# Supplementary material for: Electrophilic reactivities of cyclic enones and α,β-unsaturated lactones
Source: PubMed Central journal article supplement — Chem Sci. 2021 Feb 9;12(13):4850–65. doi: 10.1039/d0sc06628a (PMC8179571; doi:10.1039/d0sc06628a), 2021-02-09
Supplement: SC-012-D0SC06628A-s001.pdf [file SC-012-D0SC06628A-s001.pdf]

– Electronic Supplementary Information –

## **Electrophilic Reactivities of Cyclic Enones and $\alpha,\beta$ -Unsaturated Lactones**

Robert J. Mayer,<sup>a</sup> Patrick W. A. Allihn,<sup>b</sup> Nathalie Hampel,<sup>a</sup> Peter Mayer,<sup>a</sup>  
Stephan A. Sieber,<sup>b</sup> Armin R. Ofial<sup>a,\*</sup>

<sup>a</sup> *Department Chemie, Ludwig-Maximilians-Universität München,  
Butenandtstr. 5-13, 81377 München, Germany.  
Contact (A.R.O.): ofial@lmu.de*

<sup>b</sup> *Department Chemie, Technische Universität München,  
Lichtenbergstraße 4, 85748 Garching, Germany.*

## Table of Contents

|                                                                                                             |      |
|-------------------------------------------------------------------------------------------------------------|------|
| <b>Additional Tables and Figures</b> .....                                                                  | S3   |
| <b>General</b> .....                                                                                        | S5   |
| <b>Product Studies</b> .....                                                                                | S6   |
| Reactions of the Michael Acceptors <b>1-5</b> with Pyridinium Ylides <b>6</b> .....                         | S6   |
| 1-Oxo-2,3-dihydro-1 <i>H</i> -cyclopenta[ <i>a</i> ]indolizine-4-carbonitrile ( <b>8</b> ) .....            | S6   |
| 6-Acetyl-8,9-dihydropyrido[2,1- <i>a</i> ]isoindol-10(7 <i>H</i> )-one ( <b>9a</b> ) .....                  | S6   |
| 10-Oxo-7,8,9,10-tetrahydropyrido[2,1- <i>a</i> ]isoindole-6-carbonitrile ( <b>9b</b> ) .....                | S7   |
| Ethyl 10-oxo-7,8,9,10-tetrahydropyrido[2,1- <i>a</i> ]isoindole-6-carboxylate ( <b>9c</b> ) .....           | S7   |
| 11-Oxo-8,9,10,11-tetrahydro-7 <i>H</i> -cyclohepta[ <i>a</i> ]indolizine-6-carbonitrile ( <b>10</b> ) ..... | S8   |
| 1-Oxo-3,4-dihydro-1 <i>H</i> -pyrano[3,4- <i>a</i> ]indolizine-5-carbonitrile ( <b>11</b> ) .....           | S8   |
| Reactions of the Michael Acceptors <b>1-5</b> with the Sulfonium Ylide <b>7</b> .....                       | S10  |
| 4-(2-Oxobicyclo[3.1.0]hexan-6-yl)benzotrile ( <b>12</b> ) .....                                             | S12  |
| 4-(2-Oxobicyclo[4.1.0]heptan-7-yl)benzotrile ( <b>13</b> ) .....                                            | S13  |
| 4-(2-Oxo-3-oxabicyclo[3.1.0]hexan-6-yl)benzotrile ( <b>14</b> ) .....                                       | S14  |
| 4-(2-Oxo-3-oxabicyclo[4.1.0]heptan-7-yl)benzotrile ( <b>15</b> ) .....                                      | S15  |
| 4-(4-Oxo-5-oxaspiro[2.4]heptan-1-yl)benzotrile ( <b>16</b> ) .....                                          | S16  |
| 4-(4-Oxo-5-oxaspiro[2.5]octan-1-yl)benzotrile ( <b>17</b> ) .....                                           | S17  |
| Cyclopropanation of Parthenolide .....                                                                      | S19  |
| <b>Kinetics with Reference Nucleophiles</b> .....                                                           | S21  |
| <b>Competition Experiments</b> .....                                                                        | S32  |
| Competition experiment between <b>4b</b> and parthenolide ( <b>22</b> ) .....                               | S33  |
| Competition experiment between <b>4b</b> and costunolid ( <b>23</b> ) .....                                 | S35  |
| Competition experiment between <b>4b</b> and dehydroleucodine ( <b>24</b> ) .....                           | S37  |
| Competition experiment between <b>4b</b> and dehydrocostus lactone ( <b>25</b> ) .....                      | S39  |
| <b>Kinetic GSH Chemoassay</b> .....                                                                         | S41  |
| <b>Crystallographic Data</b> .....                                                                          | S44  |
| <b>Computational Details</b> .....                                                                          | S52  |
| <b>Copies of NMR Spectra of Isolated Products</b> .....                                                     | S72  |
| <b>Geometries of Optimized Structures</b> .....                                                             | S92  |
| <b>References</b> .....                                                                                     | S507 |

## Additional Tables and Figures

**Table S1.** Calculated pyramidalization  $\Delta$  in the transition states of the reactions of **7** with the cyclohexenones **2a**, **2b**, and **2c**.

| Electrophile | Pyramidalization $\Delta$ (in Å) <sup>[a]</sup> |                                               |
|--------------|-------------------------------------------------|-----------------------------------------------|
|              | <i>cis</i> -TS                                  | <i>trans</i> -TS                              |
| <b>2a</b>    | 0.220<br>(2a_sy_c_1_ts1) <sup>[b]</sup>         | 0.218<br>(2a_sy_tr_4_ts1) <sup>[b]</sup>      |
| <b>2b</b>    | 0.243<br>(2b_sy_c_6_ts1) <sup>[b]</sup>         | 0.239<br>(2b_sy_tr_2_ts1) <sup>[b]</sup>      |
| <b>2c</b>    | 0.288<br>(2c_sy_c_1_ts1) <sup>[b]</sup>         | 0.302<br>(2c_sy_tr_2_ts1_rot1) <sup>[b]</sup> |

[a] Pyramidalization  $\Delta$  describes the distance of the attacked C-atom of the electrophile from the plane defined by the three surrounding atoms (for visualization see Figures 8 in the main text). [b] For geometries, see section 'Geometries of Optimized Structures'.

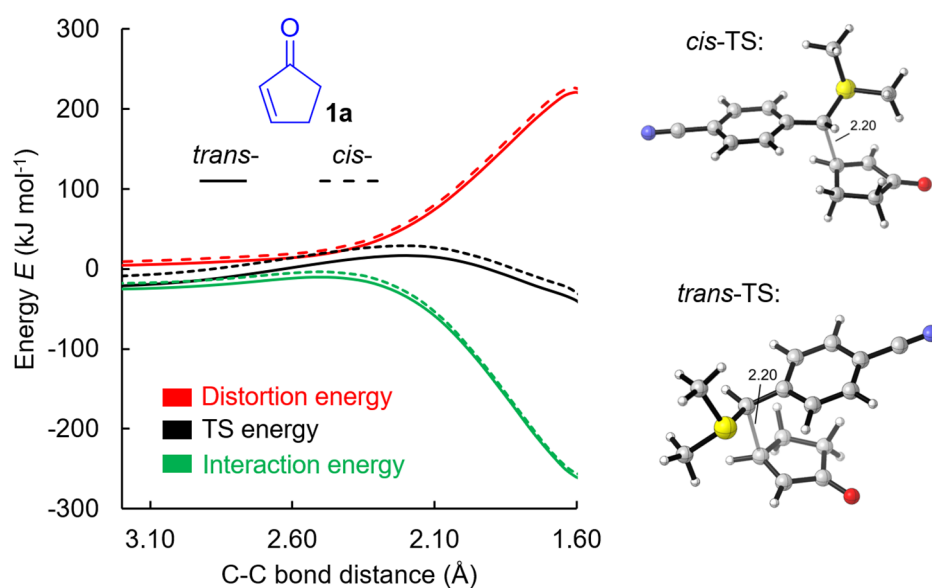

**Figure S1.** Distortion-interaction analysis (DIA) of the lowest energy conformers for the *cis*- and *trans*-transition state of the reaction of **7** with **1a**. DIA indicates that both distortion and interaction contribute to slightly favor the *trans*-TS.

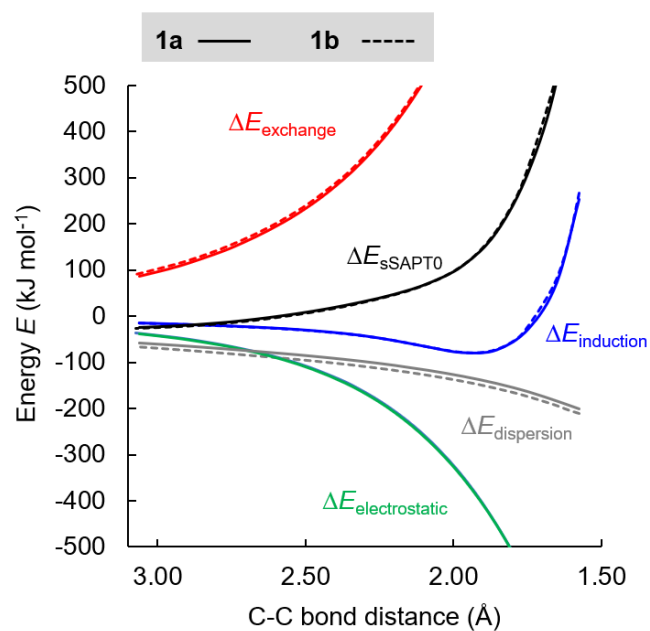

**Figure S2.** SAPT analysis of the reaction of **7** with **1a** and **1b** (both via *trans*-TS!) at the sSAPT0/jun-cc-pVDZ level of theory in the gas-phase. As indicated by the overlay of the black lines, the computation does not reveal a notable difference in the interaction energies.

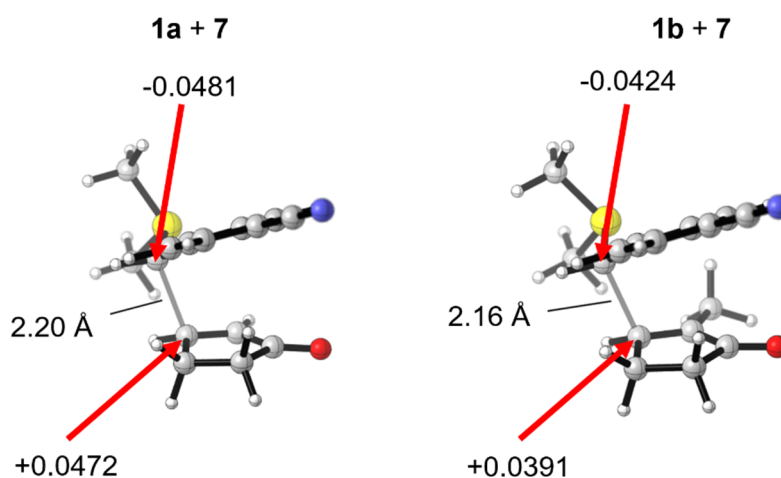

**Figure S3.** Hirshfeld atomic charge analysis for the reaction centers in the *trans*-transition states of the reactions of **7** with **1a** and **1b**.



## General

Dry DMSO (stored over molecular sieves) was used without further purification as purchased from Acros Organics for both product studies and kinetic measurements. Electrophiles **1-5** (purchased from Sigma-Aldrich, ABCR or TCI) were purified by distillation and stored under an atmosphere of dry argon.

For thin-layer chromatography, silica gel plates with F-254 fluorescence indicator (Merck) were used. Purification by flash column chromatography was performed using Merck silica gel 60 (0.040–0.063 mm) with freshly distilled solvents.

Melting points were acquired using Büchi Melting Point B-560 devices and are not corrected.

Nuclear magnetic resonance (NMR) spectra were recorded on 400 or 600 MHz spectrometers. The following abbreviations and their combinations are used in the analysis of NMR spectra: s = singlet, d = doublet, t = triplet, q = quartet, m = multiplet, br s = broad singlet. NMR signals were assigned based on information from additional 2D NMR experiments (COSY, gHSQC, gHMBC, NOESY). Chemical shifts are given in ppm. Internal reference was set to the residual solvent signals ( $\delta_{\text{H}} = 7.26$  ppm,  $\delta_{\text{C}} = 77.16$  ppm for  $\text{CDCl}_3$  and  $\delta_{\text{H}} = 2.50$  ppm,  $\delta_{\text{C}} = 39.52$  ppm for  $\text{DMSO}-d_6$ ).<sup>51</sup> The  $^{13}\text{C}$  NMR spectra were recorded under broad-band proton-decoupling.

Infrared (IR) spectra were recorded on a Perkin Elmer Spectrum BX-59343 instrument with a Smiths Detection DuraSamplIR II Diamond ATR sensor in the range 4500–600  $\text{cm}^{-1}$  as a film for liquids or neat for solids.

High resolution (HRMS) mass spectra were recorded on a Finnigan MAT 90, a Finnigan MAT 95, a Thermo Finnigan LTQ FT Ultra Fourier Transform ion cyclotron resonance or a Q Exactive GC Orbitrap GC/MS. For ionization of the samples, either electron-impact ionization (EI) or electrospray ionization (ESI) was applied.

Kinetic measurements of fast reactions ( $\tau_{1/2} < 120$  s) were performed by employing stopped-flow UV/Vis photometry on Applied Photophysics SX.20 systems. The temperature ( $20.0 \pm 0.2$  °C) was maintained constant by using circulating bath cryostats. Slower reactions were studied by conventional UV/Vis measurements which were carried out using a J&M TIDAS diode array spectrophotometer, which was controlled by TIDASDAQ3 (v3) software and connected to a Hellma 661.502-QX quartz Suprasil immersion probe (light path  $d = 5$  mm) via fiber optic cables and standard SMA connectors. All solutions were prepared by using dry DMSO and were kept under a nitrogen atmosphere.

**3-Methylenetetrahydro-2H-pyran-2-one (5b)**.<sup>52</sup> A solution of  $\delta$ -valerolactone (1.71 g, 17.1 mmol) and diethyl oxalate (5.13 g, 35.1 mmol, 2 equiv) in THF (100 mL) was added dropwise to a suspension of NaH (1.13 g, 28.2 mmol, 1.65 equiv, 60% dispersion in mineral oil) in THF (100 mL) at 0 °C under argon atmosphere. After addition of EtOH (4.50 mL), the mixture was stirred for 4 h at room temperature. Upon cooling to 0 °C, a solution of  $\text{K}_2\text{CO}_3$  (9.60 g, 69.5 mmol, 4 equiv) in water (14.1 mL) and formaldehyde (6.99 g, 86.2 mmol, 5 equiv, 37 wt. % in water) were added. After stirring for 30 min at 0 °C, the mixture was diluted with brine (50 mL) and the phases were separated. The aqueous phase was extracted with diethyl ether (3  $\times$  30 mL) and the combined organic phases were washed with brine (2  $\times$  50 mL), dried over  $\text{MgSO}_4$  and concentrated under reduced pressure. Purification by column chromatography (hexane/EtOAc 5:1) yielded **5b** as colorless oil (1.44 g, 75%). The analytical data obtained are in agreement with those reported in the literature.<sup>52</sup>

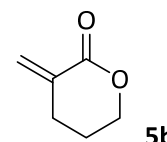

$^1\text{H}$  NMR (400 MHz,  $\text{CDCl}_3$ )  $\delta = 6.31\text{--}6.29$  (m, 1 H), 5.48–5.46 (m, 1 H), 4.30–4.27 (m, 2 H), 2.60–2.56 (m, 2 H), 1.89–1.83 (m, 2 H);  $^{13}\text{C}$  NMR (101 MHz,  $\text{CDCl}_3$ )  $\delta = 165.4, 134.2, 128.0, 69.7, 28.0, 23.1$ .

## Product Studies

### Reactions of the Michael Acceptors 1-5 with Pyridinium Ylides 6

**General procedure (GP1) for the reactions of pyridinium ylides 6 with Michael acceptors:** A flame-dried Schlenk flask under nitrogen was charged with the pyridinium salt (1 equiv) and Na<sub>2</sub>CO<sub>3</sub> (1 equiv). Under stirring, a solution of the cyclic Michael acceptor (2 equiv) in DMSO (0.2 M) was added, causing the formation of an orange solution. After stirring for 1 h at room temperature, chloranil (2 equiv) was added. Stirring the reaction mixture was continued until TLC indicated disappearance of the oxidant (usually within 1 h). Aqueous 2 M HCl was added and the reaction extracted with chloroform (3 x). The combined organic layers were washed twice with aq. 2 M NaOH followed by brine. Then the organic phase was dried over Na<sub>2</sub>SO<sub>4</sub> and concentrated under reduced pressure. Purification by column chromatography yielded the indolizines as crystalline solids.

#### 1-Oxo-2,3-dihydro-1*H*-cyclopenta[*a*]indolizine-4-carbonitrile (**8**) (RM436)

According to GP1: From cyclopentenone (**1a**, 36.2 mg, 0.441 mmol) and the pyridinium salt **6b**·HBr (43.9 mg, 0.221 mmol), **8** was obtained as colorless solid (7.6 mg, 18%) after column chromatography (50% EtOAc in pentane, silica). Slow evaporation of a CDCl<sub>3</sub> solution gave crystals suitable for single crystal X-ray diffraction experiments.

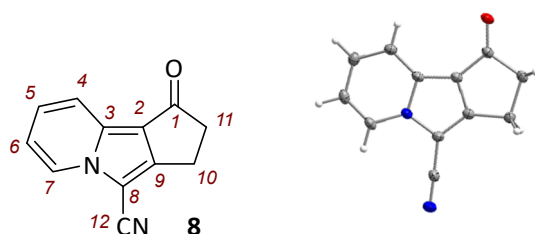

**R<sub>f</sub>** (50% EtOAc in pentane, silica, UV) = 0.36; **Mp** 180-191 °C; <sup>1</sup>H NMR (400 MHz, CDCl<sub>3</sub>) δ = 8.38 (dt, *J* = 7.0 Hz, 1.1 Hz, 1 H, 7-H), 8.01 (dt, *J* = 8.8 Hz, 1.2 Hz, 1 H, 4-H), 7.42 (ddd, *J* = 8.8 Hz, 7.0 Hz, 1.1 Hz, 1 H, 5-H), 7.14 (td, *J* = 6.9 Hz, 1.3 Hz, 1 H, 6-H), 3.25–3.22 (m, 2 H, 10-H), 3.00–2.98 (m, 2 H, 11-H); <sup>13</sup>C NMR (151 MHz, CDCl<sub>3</sub>) δ = 196.4 (C<sub>q</sub>, C-1), 156.1 (C<sub>q</sub>, C-9), 131.6 (C<sub>q</sub>, C-3), 127.3 (CH, C-5), 126.7 (CH, C-7), 119.6 (CH, C-4), 119.1 (C<sub>q</sub>, C-2), 116.1 (CH, C-6), 112.5 (C<sub>q</sub>, C-12), 91.8 (C<sub>q</sub>, C-8), 41.7 (CH<sub>2</sub>, C-11), 20.8 (CH<sub>2</sub>, C-10); **IR** (ATR, neat): 3085, 2926, 2208, 1686, 1633, 1542, 1499, 1402, 1236, 1084, 756 cm<sup>-1</sup>; **HRMS** (ESI): Calcd *m/z* for C<sub>12</sub>H<sub>9</sub>N<sub>2</sub>O<sup>+</sup> [M+H<sup>+</sup>]: 197.0709; Found: 197.0710.

#### 6-Acetyl-8,9-dihydropyrido[2,1-*a*]isoindol-10(7*H*)-one (**9a**) (RM516)

According to GP1: From cyclohexenone (**2a**, 29.2 mg, 0.304 mmol) and pyridinium salt **6a**·HCl (26.0 mg, 0.152 mmol), **9a** was obtained as colorless solid (32.2 mg, 93%) after column chromatography (50% EtOAc in pentane, silica).

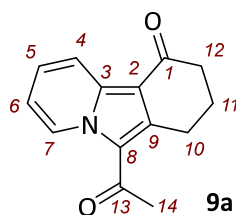

**R<sub>f</sub>** (50% EtOAc in pentane, silica, UV) = 0.30; **Mp** 179-181 °C (turns black at 170 °C); **<sup>1</sup>H NMR** (400 MHz, CDCl<sub>3</sub>) δ = 10.06 (dt, *J* = 7.1 Hz, 1.1 Hz, 1 H, 7-H), 8.51 (dt, *J* = 8.7 Hz, 1.3 Hz, 1 H, 4-H), 7.47 (ddd, *J* = 8.6 Hz, 6.9 Hz, 1.2 Hz, 1 H, 5-H), 7.06 (td, *J* = 7.0 Hz, 1.5 Hz, 1 H, 6-H), 3.22 (t, *J* = 6.2 Hz, 2 H, 10-H), 2.61 (t, *J* = 6.4 Hz, 2 H, 12-H) superimposed with 2.60 (s, 3 H, 14-H), 2.26 (p, *J* = 6.4 Hz, 2 H, 11-H); **<sup>13</sup>C NMR** (101 MHz, CDCl<sub>3</sub>) δ = 194.1 (C<sub>q</sub>, C-1), 188.1 (C<sub>q</sub>, C-13), 142.2 (C<sub>q</sub>, C-9), 137.8 (C<sub>q</sub>, C-3), 129.5 (CH, C-7), 129.0 (CH, C-5), 120.8 (C<sub>q</sub>, C-8), 119.4 (CH, C-4), 116.1 (CH, C-6), 112.3 (C<sub>q</sub>, C-2), 38.5 (CH<sub>2</sub>, C-12), 30.9 (CH<sub>3</sub>, C-14), 25.3 (CH<sub>2</sub>, C-10), 24.5 (CH<sub>2</sub>, C-11); **IR** (ATR, neat): 2950, 2920, 2850, 1648, 1604, 1502, 1485, 1451, 1401, 1365, 1177, 1142, 1119, 1082, 1031, 1017, 978, 909, 845, 776, 759, 754, 653 cm<sup>-1</sup>; **HRMS** (EI): Calcd *m/z* for [C<sub>14</sub>H<sub>13</sub>NO<sub>2</sub><sup>+</sup>] [M<sup>+</sup>]: 227.0941; Found: 227.0940.

#### 10-Oxo-7,8,9,10-tetrahydropyrido[2,1-*a*]isoindole-6-carbonitrile (**9b**) (RM290)

According to *GP1*: From cyclohexenone (**2a**, 40.0 mg, 0.416 mmol) and pyridinium salt **6b**·HBr (41.5 mg, 0.208 mmol), **9b** was obtained as colorless solid (31.5 mg, 72%) after column chromatography (50% EtOAc in pentane, silica).

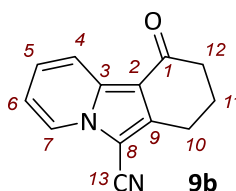

**R<sub>f</sub>** (50% EtOAc in pentane, silica, UV) = 0.40; **Mp** 145-146 °C; **<sup>1</sup>H NMR** (400 MHz, CDCl<sub>3</sub>) δ = 8.35 (dd, *J* = 8.8 Hz, 1.6 Hz, 1 H, 4-H), 8.30 (dd, *J* = 6.8 Hz, 1.5 Hz, 1 H, 7-H), 7.38 (ddd, *J* = 8.9 Hz, 6.9 Hz, 1.0 Hz, 1 H, 5-H), 7.06 (td, *J* = 6.9 Hz, 1.6 Hz, 1 H, 6-H), 3.01 (t, *J* = 6.2 Hz, 2 H, 10-H), 2.59 (dd, *J* = 6.9 Hz, 5.8 Hz, 2 H, 12-H), 2.24–2.17 (m 2 H, 11-H); **<sup>13</sup>C NMR** (101 MHz, CDCl<sub>3</sub>) δ = 193.0 (C<sub>q</sub>, C-1), 143.7 (C<sub>q</sub>, C-9), 136.3 (C<sub>q</sub>, C-3), 127.6 (CH, C-5), 125.7 (CH, C-7), 120.5 (CH, C-4), 115.8 (CH, C-6), 112.6 (C<sub>q</sub>, C-13), 111.5 (C<sub>q</sub>, C-2), 94.1 (C<sub>q</sub>, C-8), 38.9 (CH<sub>2</sub>, C-12), 24.3 (CH<sub>2</sub>, C-11), 22.0 (CH<sub>2</sub>, C-10); **IR** (ATR, neat): 2919, 2202, 1655, 1633, 1501, 1395, 1178, 1160, 1099, 957, 843, 752, 739 cm<sup>-1</sup>; **HRMS** (EI): Calcd *m/z* for [C<sub>13</sub>H<sub>10</sub>N<sub>2</sub>O<sup>+</sup>] [M<sup>+</sup>]: 210.0788; Found: 210.0789.

#### Ethyl 10-oxo-7,8,9,10-tetrahydropyrido[2,1-*a*]isoindole-6-carboxylate (**9c**) (RM517)

According to *GP1*: From cyclohexenone (**2a**, 30.1 mg, 0.313 mmol) and pyridinium salt **6c**·HBr (38.5 mg, 0.156 mmol), **9c** was obtained as pale orange solid (35.9 mg, 89%) after column chromatography (30% EtOAc in pentane, silica). The NMR spectroscopic data for **9c** agree with those reported by Tamura and co-workers.<sup>S3</sup>

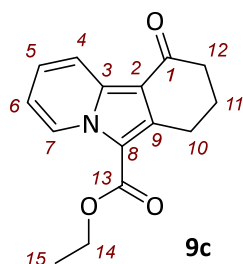

**R<sub>f</sub>** (50% EtOAc in pentane, silica, UV) = 0.55; **Mp** 147–150 °C (ref. **S3**: mp 151–152 °C, from light petroleum (bp 60–80 °C)); **<sup>1</sup>H NMR** (400 MHz, CDCl<sub>3</sub>) δ = 9.59 (dt, *J* = 7.1 Hz, 1.1 Hz, 1 H, 7-H), 8.43 (dt, *J* = 8.8 Hz, 1.3 Hz, 1 H, 4-H), 7.37 (ddd, *J* = 8.8 Hz, 6.9 Hz, 1.2 Hz, 1 H, 5-H), 7.01 (td, *J* = 7.0 Hz, 1.5 Hz, 1 H, 6-H), 4.41 (q, *J* = 7.1 Hz, 2 H, 14-H), 3.21 (t, *J* = 6.2 Hz, 2 H, 10-H), 2.58 (dd, *J* = 7.2 Hz, 5.7 Hz, 2 H, 12-H), 2.18 (p, *J* = 6.3 Hz, 2 H, 11-H), 1.43 (t, *J* = 7.1 Hz, 3 H, 15-H); **<sup>13</sup>C NMR** (101 MHz, CDCl<sub>3</sub>) δ = 194.3 (C<sub>q</sub>, C-1), 162.1 (C<sub>q</sub>, C-13), 142.6 (C<sub>q</sub>, C-9), 137.4 (C<sub>q</sub>, C-3), 128.3 (CH, C-7), 127.3 (CH, C-5), 119.6 (CH, C-4), 115.3 (CH, C-6), 111.8 (C<sub>q</sub>, C-2), 111.4 (C<sub>q</sub>, C-8), 60.3 (CH<sub>2</sub>, C-14), 39.0 (CH<sub>2</sub>, C-12), 24.4 (CH<sub>2</sub>, C-11), 24.1 (CH<sub>2</sub>, C-10), 14.7 (CH<sub>3</sub>, C-15); **IR** (ATR, neat): 2954, 2921, 2850, 1679, 1644, 1626, 1506, 1496, 1411, 1387, 1338, 1211, 1178, 1148, 1139, 1088, 1045, 1024, 781, 768 cm<sup>-1</sup>; **HRMS** (EI): Calcd *m/z* for [C<sub>15</sub>H<sub>15</sub>NO<sub>3</sub><sup>+</sup>] [M<sup>+</sup>]: 257.1046; Found: 257.1046.

#### 11-Oxo-8,9,10,11-tetrahydro-7H-cyclohepta[a]indolizine-6-carbonitrile (**10**) (RM563)

According to *GP1*: From cycloheptenone **3** (45.1 mg, 0.409 mmol) and pyridinium salt **6b**·HBr (40.7 mg, 0.204 mmol), **10** was obtained as colorless solid (39.2 mg, 86%) after column chromatography (30% EtOAc in pentane, silica).

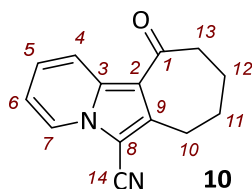

**R<sub>f</sub>** (50% EtOAc in pentane, silica, UV) = 0.45; **Mp** 127–128 °C; **<sup>1</sup>H NMR** (400 MHz, CDCl<sub>3</sub>) δ = 8.50 (dt, *J* = 9.0 Hz, 1.2 Hz, 1 H, 4-H), 8.27 (dt, *J* = 6.8 Hz, 1.1 Hz, 1 H, 7-H), 7.36 (ddd, *J* = 9.0 Hz, 6.9 Hz, 1.1 Hz, 1 H, 6-H), 7.04 (td, *J* = 6.9 Hz, 1.3 Hz, 1 H, 5-H), 3.13–3.10 (m, 2 H, 10-H), 2.79–2.76 (m, 2 H, 13-H), 2.04–1.92 (m, 4 H, 11-H and 12-H); **<sup>13</sup>C NMR** (101 MHz, CDCl<sub>3</sub>) δ = 197.3 (C<sub>q</sub>, C-1), 142.2 (C<sub>q</sub>, C-9), 138.3 (C<sub>q</sub>, C-3), 127.3 (CH, C-6), 125.4 (CH, C-7), 120.8 (CH, C-4), 115.6 (CH, C-5), 114.2 (C<sub>q</sub>, C-2), 112.9 (C<sub>q</sub>, C-14), 96.2 (C<sub>q</sub>, C-8), 42.3 (CH<sub>2</sub>, C-13), 25.03 and 25.02 (2 × CH<sub>2</sub>, C-10 and C-11), 21.8 (CH<sub>2</sub>, C-12); **IR** (ATR, neat): 2921, 2849, 2200, 1631, 1613, 1488, 1380, 1222, 1102, 918, 909, 801, 752, 739 cm<sup>-1</sup>; **HRMS** (EI): Calcd *m/z* for [C<sub>14</sub>H<sub>12</sub>N<sub>2</sub>O<sup>+</sup>] [M<sup>+</sup>]: 224.0944; Found: 224.0941.

#### 1-Oxo-3,4-dihydro-1H-pyrano[3,4-a]indolizine-5-carbonitrile (**11**) (RM438)

According to *GP1*: From **5a** (35.1 mg, 0.358 mmol) and pyridinium salt **6b**·HBr (35.6 mg, 0.179 mmol), **11** was obtained as colorless solid (29.6 mg, 78%) after column chromatography (50% EtOAc in pentane, silica).

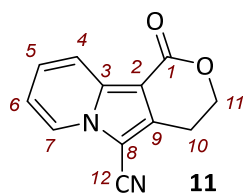

**R<sub>f</sub>** (50% EtOAc in pentane, silica, UV) = 0.40; **Mp** 265-266 °C; **<sup>1</sup>H NMR** (599 MHz, CDCl<sub>3</sub>) δ = 8.36 (dt, *J* = 6.9 Hz, 1.1 Hz, 1 H, 7-H), 8.24 (dt, *J* = 8.9 Hz, 1.2 Hz, 1 H, 4-H), 7.43 (ddd, *J* = 8.9 Hz, 6.9 Hz, 1.1 Hz, 1 H, 5-H), 7.12 (td, *J* = 6.9 Hz, 1.3 Hz, 1 H, 6-H), 4.61 (dd, *J* = 6.3 Hz, 5.9 Hz, 1 H, 11-H), 3.18 (dd, *J* = 6.4 Hz, 5.8 Hz, 1 H, 10-H); **<sup>13</sup>C NMR** (151 MHz, CDCl<sub>3</sub>) δ = 161.9 (C<sub>q</sub>, C-1), 138.2 (C<sub>q</sub>, C-9), 137.7 (C<sub>q</sub>, C-3), 127.6 (CH, C-5), 126.1 (CH, C-7), 119.9 (CH, C-4), 116.0 (CH, C-6), 112.0 (C<sub>q</sub>, C-12), 101.6 (C<sub>q</sub>, C-2), 93.6 (C<sub>q</sub>, C-8), 67.9 (CH<sub>2</sub>, C-11), 21.7 (CH<sub>2</sub>, C-10); **IR** (ATR, neat): 2923, 2850, 2203, 1699, 1633, 1502, 1462, 1400, 1307, 1257, 1201, 1157, 1085, 1066, 1040, 966, 787, 778, 752 cm<sup>-1</sup>. **HRMS** (EI): Calcd *m/z* for [C<sub>12</sub>H<sub>8</sub>N<sub>2</sub>O<sub>2</sub>]<sup>+</sup> [M<sup>+</sup>]: 212.0580; Found: 212.0581.

## Reactions of the Michael Acceptors 1-5 with the Sulfonium Ylide 7

### Initial Experiments

Product studies of simple Michael acceptors with sulfonium ylide **7** were performed at an ylide concentration of 0.15 M using the ylide in excess over the enone (0.66 equiv).<sup>S4</sup> However, cyclopropanations of cyclopentenone (**1a**) and cyclohexenone (**2a**) were inefficient with this protocol owing to a partial consumption of **7** by a concomitant rearrangement to the sulfide **18**.

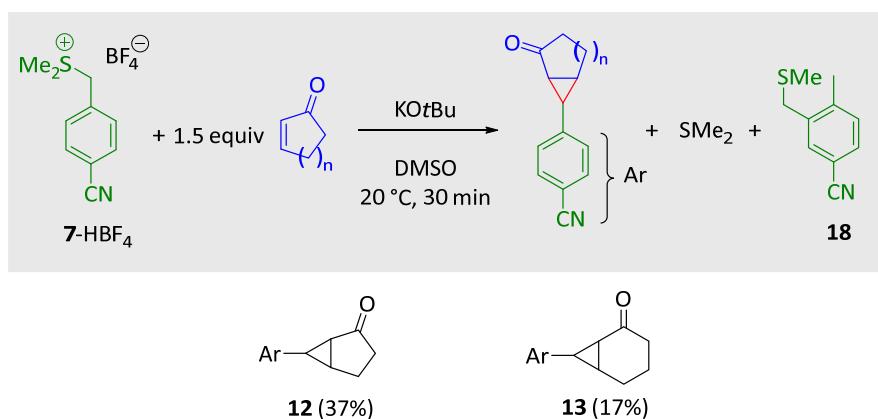

### Reaction of cyclopentenone (**1a**) with **7**

(RM445)

In a flame dried Schlenk-flask cyclopentenone **1a** (41.1 mg, 0.50 mmol) and the sulfonium salt (**7**·HBF<sub>4</sub>, 199 mg, 0.75 mmol) were dissolved in DMSO (5 mL). A solution of potassium *tert*-butoxide in DMSO (84.2 mg, 0.75 mmol in 2 mL) was added dropwise within 5 min. After stirring of the orange reaction mixture for another 5 min, saturated aq. NH<sub>4</sub>Cl was added (20 mL), and the mixture was extracted with CH<sub>2</sub>Cl<sub>2</sub> (3×), washed with brine, dried over Na<sub>2</sub>SO<sub>4</sub>, and concentrated. Purification by column chromatography (silica gel, 10 to 50% EtOAc in pentane) yielded two main fractions: (a) the rearrangement product **18** of the sulfonium ylide (48.5 mg, 37%) and (b) the cyclopropane **12** as a mixture of diastereomers (36.6 mg, 37%).

The sulfide **18** crystallized readily and its structure was characterized by single-crystal X-ray diffraction (analytics, see below).

### Reaction of cyclohexenone (**2a**) with **7**

(RM446)

Under analogous conditions as for the reaction of **1a** (RM445), the reaction of cyclohexenone **2a** (48.1 mg, 0.50 mmol) with **7**·HBF<sub>4</sub> yielded the sulfide **18** (57.6 mg, 43%) and the cyclopropane **13** (18.3 mg, 17%) after column chromatography (silica gel, 10 to 40% EtOAc in pentane).

#### 4-Methyl-3-((methylthio)methyl)benzonitrile (**18**)

(RM445)

In the reaction of the sulfonium ylide **7** with cyclopentenone (**1a**) described above (RM445), the sulfonium ylide concomitantly rearranged to the sulfide **18**. The sulfide **18**<sup>S5</sup> was isolated as major by-product (48.5 mg, 37%) and fully characterized. For reported <sup>1</sup>H NMR chemical shift of **18** in *d*<sub>6</sub>-DMSO, see ref [S5b](#).

Crystalline **18** was obtained over night by slow crystallization of the neat sample obtained after column chromatography.

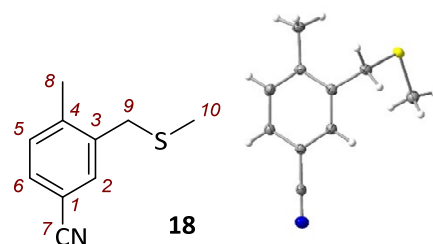

**R<sub>f</sub>** (10% EtOAc in pentane, silica, UV) = 0.67; **Mp** 66-67 °C (ref. [S5a](#): mp 57–58 °C, from methanol); **<sup>1</sup>H NMR** (400 MHz, CDCl<sub>3</sub>) δ = 7.47–7.44 (m, 2 H, 2-H and 6-H), 7.28–7.26 (m, 1 H, 5-H), 3.66 (s, 2 H, 9-H), 2.45 (s, 3 H, 8-H), 2.03 (s, 3 H, 10-H); **f**; **<sup>13</sup>C NMR** (101 MHz, CDCl<sub>3</sub>) δ = 142.8 (C<sub>q</sub>, C-3), 137.6 (C<sub>q</sub>, C-4), 132.8 (CH, C-2), 131.6 (CH, C-5), 131.0 (CH, C-6), 119.1 (C<sub>q</sub>, C-7), 109.7 (C<sub>q</sub>, C-1), 35.9 (CH<sub>2</sub>, C-9), 19.7 (CH<sub>3</sub>, C-8), 15.4 (CH<sub>3</sub>, C-10); **IR** (ATR, neat): 2953, 2917, 2852, 2222, 1603, 1497, 1435, 1104, 1029, 982, 960, 908, 822 cm<sup>-1</sup>; **HRMS** (EI): Calcd *m/z* for [C<sub>10</sub>H<sub>11</sub>NS<sup>+</sup>] [M<sup>+</sup>]: 177.0607; Found: 177.0598.

#### Rearrangement of **7** (to **18**) in DMSO solution

In a flame dried Schlenk-flask the sulfonium salt **7**·HBF<sub>4</sub> (100 mg, 0.377 mmol) was dissolved in DMSO (3 mL). A solution of KO<sup>t</sup>Bu in DMSO (42.3 mg, 0.377 mmol in 1.5 mL) was added dropwise within 5 min, which yielded a dark-green solution. After stirring for another 20 min, saturated aq. NH<sub>4</sub>Cl was added (20 mL), and the mixture was extracted with dichloromethane (3 ×), washed with brine, dried over Na<sub>2</sub>SO<sub>4</sub> and concentrated to yield a dark yellow solid (60.3 mg) which almost entirely consisted of the rearrangement product **18**.

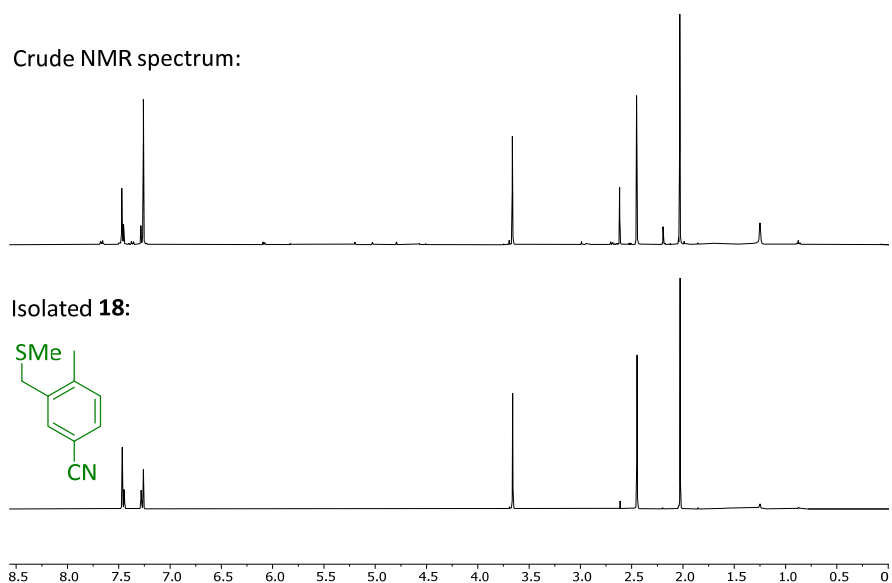

4-(2-Oxobicyclo[3.1.0]hexan-6-yl)benzonitrile (**12**)  
(RNH389)

To a mixture of cyclopentenone **1a** (287 mg, 3.50 mmol) and the sulfonium salt **7**·HBF<sub>4</sub> (186 mg, 0.700 mmol) in DMSO (26 mL) was added KOtBu (78.6 mg, 0.700 mmol) in DMSO (30 mL). After stirring for 5 min, saturated aq. NH<sub>4</sub>Cl was added (20 mL), and the mixture was extracted with dichloromethane (3 ×). The combined extracts were washed with brine, dried over Na<sub>2</sub>SO<sub>4</sub> and concentrated. At this stage, the diastereomeric ratio of the products was determined by <sup>1</sup>H NMR spectroscopy (see spectrum below). After column chromatography (30 to 60% EtOAc in pentane, silica) **12** was isolated as a yellowish oil (mixture of diastereomers, 116 mg, 84%; **12(D1)/12(D2)** = 1.00/0.81).

Aromatic part of the <sup>1</sup>H NMR spectrum after aqueous workup and extraction:

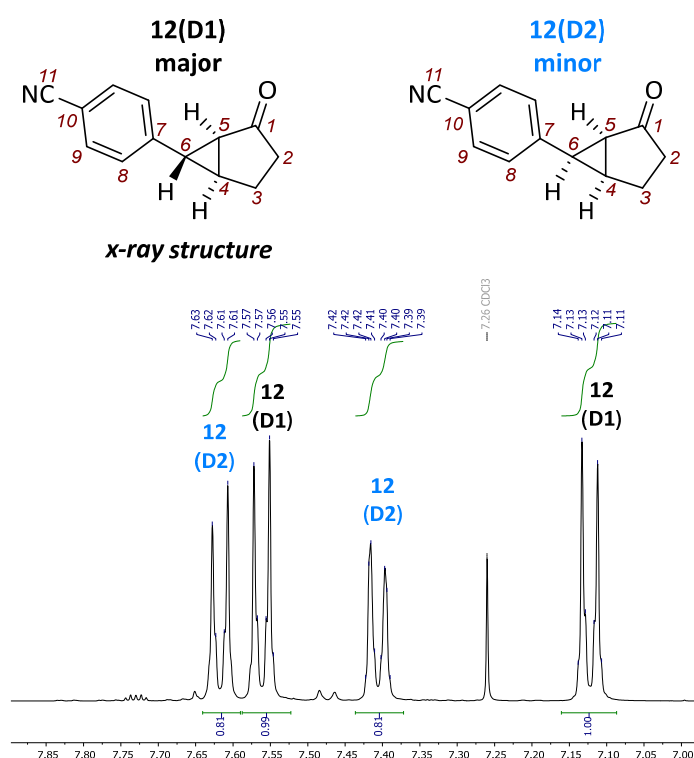

While standing for elongated time at room temperature, the major diastereomer **12(D1)** partially crystallized in an aggregate of colorless needles, leaving an oil, in which the minor diastereomer **12(D2)** was significantly enriched.

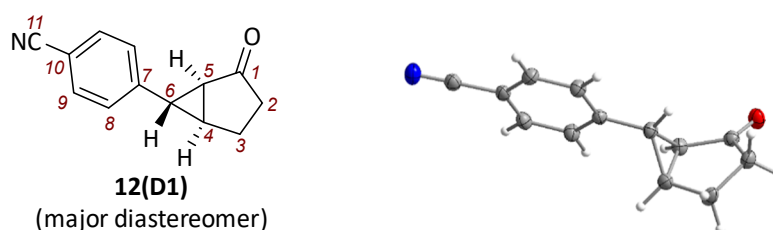

Analytical data for **12(D1)**. *R<sub>f</sub>* (30% EtOAc in pentane, silica, UV) = 0.40; *Mp* 99-103 °C; <sup>1</sup>H NMR (400 MHz, CDCl<sub>3</sub>) δ = 7.58–7.55 (m, 2 H, 9-H), 7.14–7.11 (m, 2 H, 8-H), 2.43–2.40 (m, 1 H, 4-H), 2.37 (dd, *J* = 3.8 Hz, 2.8 Hz, 1 H, 6-H), 2.35–2.16 (m, 4 H, 2-H<sub>2</sub>, 3-H<sub>2</sub>), 2.10 (dd, *J* = 5.4 Hz, 2.7 Hz, 1 H, 5-H); <sup>13</sup>C NMR (101 MHz, CDCl<sub>3</sub>) δ = 212.2 (C<sub>q</sub>, C-1), 144.9 (C<sub>q</sub>, C-7), 132.5 (CH, C-9), 126.6 (CH, C-8), 118.8 (C<sub>q</sub>, C-11), 110.5 (C<sub>q</sub>, C-10), 39.4 (CH, C-5), 32.3 (CH<sub>2</sub>, C-2), 31.4 (CH, C-4), 30.3 (CH, C-6), 23.4 (CH<sub>2</sub>, C-3); IR (ATR, neat): 2943, 2223, 1714, 1605, 1505, 1185, 1177, 1042, 878, 851, 842, 825, 799 cm<sup>-1</sup>; HRMS (EI<sup>+</sup>): Calcd *m/z* for [C<sub>13</sub>H<sub>11</sub>NO<sup>+</sup>] [M<sup>+</sup>]: 197.0835; Found: 197.0834.



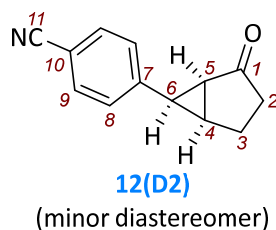

**Analytical data for 12(D2).** Oil, NMR spectroscopic analytics for a **12(D2)**-enriched mixture which contains additional contaminations.  $R_f$  (30% EtOAc in pentane, silica, UV) = 0.40;  $^1\text{H NMR}$  (400 MHz,  $\text{CDCl}_3$ )  $\delta$  = 7.64–7.61 (m, 2 H, 9- $\text{H}^{\text{D}2}$ ), 7.58–7.55 (m, 2 H, 9- $\text{H}^{\text{D}1}$ ), 7.43–7.39 (m, 2 H, 8- $\text{H}^{\text{D}2}$ ), 7.14–7.11 (m, 2 H, 8- $\text{H}^{\text{D}1}$ ), 2.79 (t,  $J$  = 8.8 Hz, 1 H, 6- $\text{H}^{\text{D}2}$ ), 2.48 (dt,  $J$  = 8.2 Hz, 5.6 Hz, 1 H, 4- $\text{H}^{\text{D}2}$ ), 2.43–2.40 (m, 1 H, 4- $\text{H}^{\text{D}1}$ ), 2.37–2.17 (m, 5 H + 2  $\text{H}^{\text{D}2}$ , 2- $\text{H}_2^{\text{D}1}$  3- $\text{H}_2^{\text{D}1}$  6- $\text{H}^{\text{D}}$ ; 3- $\text{H}^{\text{D}2}$  and 5- $\text{H}^{\text{D}2}$ ), 2.10 (dd,  $J$  = 5.4 Hz, 2.7 Hz, 1 H, 5- $\text{H}^{\text{D}1}$ ), 1.99–1.84 (m, 2 H, 2- $\text{H}^{\text{D}2}$  and 3- $\text{H}^{\text{D}2}$ ), 0.91–0.80 (m, 1 H, 2- $\text{H}^{\text{D}2}$ );  $^{13}\text{C NMR}$  (101 MHz,  $\text{CDCl}_3$ )  $\delta$  = 213.9 ( $\text{C}_q$ , C-1 $^{\text{D}2}$ ), 212.2 ( $\text{C}_q$ , C-1 $^{\text{D}1}$ ), 144.9 ( $\text{C}_q$ , C-7 $^{\text{D}1}$ ), 141.0 ( $\text{C}_q$ , C-7 $^{\text{D}2}$ ), 132.7 (CH, C-9 $^{\text{D}2}$ ), 132.5 (CH, C-9 $^{\text{D}1}$ ), 130.6 (CH, C-8 $^{\text{D}2}$ ), 126.6 (CH, C-8 $^{\text{D}1}$ ), 118.8 ( $\text{C}_q$ , C-11 $^{\text{D}1}$ ), 118.7 ( $\text{C}_q$ , C-11 $^{\text{D}2}$ ), 111.4 ( $\text{C}_q$ , C-10 $^{\text{D}2}$ ), 110.5 ( $\text{C}_q$ , C-10 $^{\text{D}1}$ ), 39.4 (CH, C-5 $^{\text{D}1}$ ), 35.1 ( $\text{CH}_2$ , C-2 $^{\text{D}2}$ ), 33.8 (CH, C-5 $^{\text{D}2}$ ), 32.3 ( $\text{CH}_2$ , C-2 $^{\text{D}1}$ ), 31.4 (CH, C-4 $^{\text{D}1}$ ), 30.3 (CH, C-6 $^{\text{D}1}$ ), 28.7 (CH, C-6 $^{\text{D}2}$ ), 27.7 (CH, C-4 $^{\text{D}2}$ ), 23.4 ( $\text{CH}_2$ , C-3 $^{\text{D}1}$ ), 20.2 ( $\text{CH}_2$ , C-3 $^{\text{D}2}$ ).

#### 4-(2-Oxobicyclo[4.1.0]heptan-7-yl)benzonitrile (**13**) (RNH503)

A solution of cyclohexenone **2a** (674 mg, 7.00 mmol) and the sulfonium salt **7**· $\text{HBF}_4$  (186 mg, 0.700 mmol) in DMSO (26 mL) was mixed with a solution of  $\text{KOtBu}$  (78.6 mg, 0.700 mmol) in DMSO (30 mL). After stirring for 5 min, saturated aq.  $\text{NH}_4\text{Cl}$  was added (20 mL), and the mixture was extracted with dichloromethane (3  $\times$ ). The combined extracts were washed with brine, dried over  $\text{Na}_2\text{SO}_4$  and concentrated. At this stage, the diastereomeric ratio of the products was determined by  $^1\text{H NMR}$  spectroscopy (see spectrum below). After column chromatography (30% EtOAc in pentane, silica) **13** was isolated as a colorless oil (mixture of diastereomers, 55.1 mg, 37%).

A diastereomeric ratio of d.r. = 1:0.15 was determined from the  $^1\text{H NMR}$  spectrum of the crude material after aq workup. After column chromatography d.r. changed to 1:0.08. Only the resonances for the major diastereomer are reported. Further unassigned resonances originate mainly from the minor diastereomer.

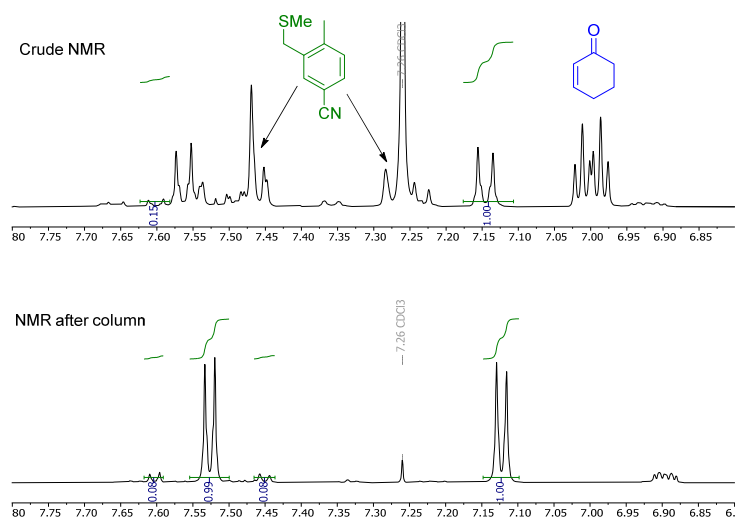

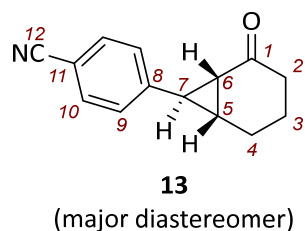

**R<sub>f</sub>** (30% EtOAc in pentane, silica, UV) = 0.30; **<sup>1</sup>H NMR** (599 MHz, CDCl<sub>3</sub>) δ = 7.57–7.55 (m, 2 H, 10-H), 7.16–7.13 (m, 2 H, 9-H), 2.65 (t, *J* = 4.6 Hz, 1 H, 7-H), 2.43–2.38 (m, 1 H, 2-H), 2.21–2.00 (m, 5 H, 2-H', 6-H, 5-H, 3-H<sub>2</sub>), 1.86–1.75 (m, 2 H, 4-H<sub>2</sub>); **<sup>13</sup>C NMR** (151 MHz, CDCl<sub>3</sub>) δ = 205.6 (C<sub>q</sub>, C-1), 145.7 (C<sub>q</sub>, C-8), 132.5 (CH, C-10), 126.8 (CH, C-9), 118.9 (C<sub>q</sub>, C-12), 110.3 (C<sub>q</sub>, C-11), 37.4 (CH, C-6), 37.1 (CH<sub>2</sub>, C-2), 27.5 (CH, C-7), 27.4 (CH, C-5), 21.3 (CH<sub>2</sub>, C-3), 18.6 (CH<sub>2</sub>, C-4); the relative stereochemistry was assigned based on additional data from NOESY experiments; **HRMS** (EI<sup>+</sup>): Calcd *m/z* for [C<sub>14</sub>H<sub>13</sub>NO<sup>+</sup>] [M<sup>+</sup>]: 211.0992; Found: 211.0991.

#### 4-(2-Oxo-3-oxabicyclo[3.1.0]hexan-6-yl)benzimidazole (14) (RNH394)

A solution of furanone **4a** (589 mg, 7.00 mmol) and the sulfonium salt **7**·HBF<sub>4</sub> (186 mg, 0.702 mmol) in DMSO (26 mL) was mixed with a solution of KOtBu (78.6 mg, 0.700 mmol) in DMSO (30 mL). Aq workup (as described for **12**, RNH389) followed by column chromatography (30 to 60% EtOAc in pentane, silica) and preparative TLC (80% EtOAc in pentane) furnished two diastereomers of **14** (total: 29.3 mg, 21%).

The <sup>1</sup>H NMR spectrum of the crude material after extraction and removal of solvents indicates a diastereomeric ratio d.r. ≈ 1:1.

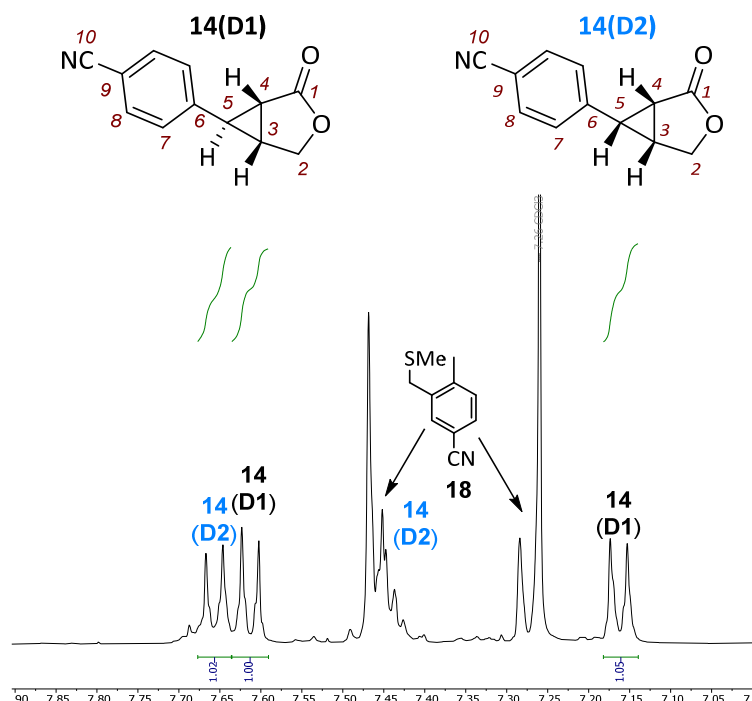

Analytical data for **14(D1)**. Yield: 22.2 mg (after column chromatography but still containing minor impurities); **R<sub>f</sub>** (30% EtOAc in pentane, silica, UV) = 0.23; **Mp** 117–118 °C; **<sup>1</sup>H NMR** (400 MHz, CDCl<sub>3</sub>) δ = 7.62–7.60 (m, 2 H, 8-H), 7.18–7.15 (m, 2 H, 7-H), 4.50 (dd, *J* = 9.7 Hz, 4.7 Hz, 1 H, 2-H), 4.44 (d, *J* = 9.7 Hz, 1 H, 2-H'), 2.62–2.55 (m, 1 H, 3-H), 2.41 (dd, *J* = 6.2 Hz, 2.8 Hz, 1 H, 4-H), 2.35 (t, *J* = 3.3 Hz, 1 H, 5-

H);  $^{13}\text{C}$  NMR (101 MHz,  $\text{CDCl}_3$ )  $\delta$  = 174.1 ( $\text{C}_q$ , C-1), 142.9 ( $\text{C}_q$ , C-6), 132.7 (CH, C-8), 126.7 (CH, C-7), 118.6 ( $\text{C}_q$ , C-10), 111.2 ( $\text{C}_q$ , C-9), 69.7 ( $\text{CH}_2$ , C-2), 29.1 (CH, C-5), 28.1 (CH, C-4), 27.0 (CH, C-3); HRMS (EI $^+$ ): Calcd  $m/z$  for  $[\text{C}_{12}\text{H}_8\text{NO}_2]^+$   $[\text{M}-\text{H}^+]$ : 198.0550; Found: 198.0549.

Analytical data for **14(D2)**. Yield: 7.1 mg (after preparative TLC);  $R_f$  (30% EtOAc in pentane, silica, UV) = 0.11;  $\text{Mp}$  86 °C;  $^1\text{H}$  NMR (400 MHz,  $\text{CDCl}_3$ )  $\delta$  = 7.66–7.64 (m, 2 H, 8-H), 7.46–7.43 (m, 2 H, 7-H), 4.41 (dt,  $J$  = 10.1 Hz, 2.6 Hz, 1 H, 2-H), 3.99 (d,  $J$  = 10.1 Hz, 1 H, 2-H'), 2.81 (t,  $J$  = 8.4 Hz, 1 H, 5-H), 2.68–2.65 (m, 2 H, 3-H and 4-H);  $^{13}\text{C}$  NMR (101 MHz,  $\text{CDCl}_3$ )  $\delta$  = 174.2 ( $\text{C}_q$ , C-1), 138.1 ( $\text{C}_q$ , C-6), 132.9 (CH, C-8), 130.5 (CH, C-7), 118.6 ( $\text{C}_q$ , C-10), 112.1 ( $\text{C}_q$ , C-9), 65.8 ( $\text{CH}_2$ , C-2), 26.0 (CH, C-5), 24.0 (CH, C-3 or C-4), 23.8 (CH, C-3 or C-4); IR (ATR, neat): 2915, 2228, 1760, 1609, 1365, 1175, 1065, 1035, 982, 844  $\text{cm}^{-1}$ ; HRMS (EI $^+$ ): Calcd  $m/z$  for  $[\text{C}_{12}\text{H}_8\text{NO}_2]^+$   $[\text{M}-\text{H}^+]$ : 198.0550; Found: 198.0550.

#### 4-(2-Oxo-3-oxabicyclo[4.1.0]heptan-7-yl)benzotrile (15) (RM447, RNH399)

A solution of pyranone **5a** (687 mg, 7.00 mmol) and the sulfonium salt **7**· $\text{HBF}_4$  (186 mg, 0.700 mmol) in DMSO (26 mL) was mixed with a solution of  $\text{KOtBu}$  (78.5 mg, 0.700 mmol) in DMSO (30 mL). Aq workup (as described for **12**, RNH389) followed by column chromatography (10 to 50% EtOAc in pentane, silica) yielded **15** as a colorless oil (mixture of diastereomers, 31.1 mg, 21%).

Due to superimposed resonances in the crude  $^1\text{H}$  NMR spectrum, the diastereomeric ratio was determined after column chromatography to be d.r. = 1.7:1.0.

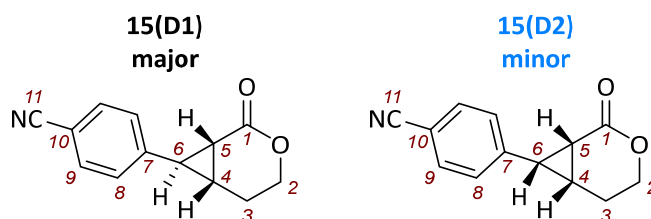

One of the two diastereomers was separately isolated from an independent experiment (RM447, see below), which facilitates the assignment of the NMR resonances.

$^1\text{H}$  NMR (400 MHz,  $\text{CDCl}_3$ )  $\delta$  = 7.64–7.62 (m, 2 H, 9- $\text{H}^{\text{D}2}$ ), 7.61–7.58 (m, 2 H, 9- $\text{H}^{\text{D}1}$ ), 7.46–7.43 (m, 2 H, 8- $\text{H}^{\text{D}2}$ ), 7.20–7.18 (m, 2 H, 8- $\text{H}^{\text{D}1}$ ), 4.41–4.35 (m, 1 H, 2- $\text{H}^{\text{D}1}$ ), 4.26 (td,  $J$  = 12.6 Hz, 3.6 Hz, 1 H, 2- $\text{H}'^{\text{D}1}$ ), 3.96 (ddd,  $J$  = 12.0 Hz, 6.6 Hz, 3.3 Hz, 1 H, 2- $\text{H}^{\text{D}2}$ ), 3.02 (ddd,  $J$  = 12.0 Hz, 11.1 Hz, 4.5 Hz, 1 H, 2- $\text{H}'^{\text{D}2}$ ), 2.94 (t,  $J$  = 4.4 Hz, 1 H, 6- $\text{H}^{\text{D}1}$ ), 2.78 (t,  $J$  = 9.2 Hz, 1 H, 6- $\text{H}^{\text{D}2}$ ), 2.36 (dd,  $J$  = 9.7 Hz, 7.8 Hz, 1 H, 5- $\text{H}^{\text{D}2}$ ), 2.33–2.25 (m, 1 H, 3- $\text{H}^{\text{D}1}$  and 1 H, 3- $\text{H}^{\text{D}2}$ ), 2.21 (dd,  $J$  = 8.9 Hz, 3.9 Hz, 1 H, 5- $\text{H}^{\text{D}1}$ ), 2.19–2.08 (m, 2 H, 3- $\text{H}'^{\text{D}1}$  and 4- $\text{H}^{\text{D}1}$ ), 1.96–1.90 (m, 1 H, 3- $\text{H}'^{\text{D}2}$ );  $^{13}\text{C}$  NMR (101 MHz,  $\text{CDCl}_3$ )  $\delta$  = 170.0 ( $\text{C}_q$ , C-1 $^{\text{D}2}$ ), 168.5 ( $\text{C}_q$ , C-1 $^{\text{D}1}$ ), 143.9 ( $\text{C}_q$ , C-10 $^{\text{D}1}$ ), 141.3 ( $\text{C}_q$ , C-10 $^{\text{D}2}$ ), 133.0 (CH, C-9 $^{\text{D}2}$ ), 132.6 (CH, C-9 $^{\text{D}1}$ ), 129.9 (CH, C-8 $^{\text{D}2}$ ), 127.0 (CH, C-8 $^{\text{D}1}$ ), 118.6 ( $\text{C}_q$ , C-11 $^{\text{D}1}$ ), 118.5 ( $\text{C}_q$ , C-11 $^{\text{D}2}$ ), 111.8 ( $\text{C}_q$ , C-10 $^{\text{D}2}$ ), 111.0 ( $\text{C}_q$ , C-10 $^{\text{D}1}$ ), 65.9 ( $\text{CH}_2$ , C-2 $^{\text{D}2}$ ), 64.6 ( $\text{CH}_2$ , C-2 $^{\text{D}1}$ ), 28.1 (CH, C-5 $^{\text{D}2}$ ), 27.2 (CH, C-5 $^{\text{D}1}$ ), 24.8 (CH, C-6 $^{\text{D}1}$ ), 24.4 (CH, C-4 $^{\text{D}1}$ ), 20.4 ( $\text{CH}_2$ , C-3 $^{\text{D}1}$ ), 19.6 (CH, C-4 $^{\text{D}2}$ ), 19.1 ( $\text{CH}_2$ , C-3 $^{\text{D}2}$ ), 18.8 (CH, C-6 $^{\text{D}2}$ ).

#### 4-((1R,6R,7R)-2-Oxo-3-oxabicyclo[4.1.0]heptan-7-yl)benzotrile **15(D1)** (and enantiomer) (RM447)

The diastereomer **15(D1)** was also isolated from a reaction of **5a** with **7** under non-optimized reaction conditions: From pyranone **5a** (49.1 mg, 0.500 mmol), the sulfonium salt **7**· $\text{HBF}_4$  (199 mg, 0.751 mmol)

and KOtBu (84.2 mg), a single diastereomer of **15** was obtained as colorless solid (7.1 mg, 7%) after aq workup (as described for **12**, RNH389), column chromatography (10 to 50% EtOAc in pentane, silica) and subsequent preparative TLC (50% EtOAc in pentane). Assignments of NMR signals are based on additional gHSQC and gHMBC experiments. Slow evaporation of a CDCl<sub>3</sub> solution gave crystals suitable for single crystal X-ray analysis.

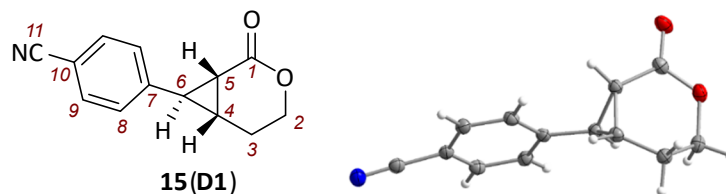

**R<sub>f</sub>** (40% EtOAc in pentane, silica, UV) = 0.43; **<sup>1</sup>H NMR** (400 MHz, CDCl<sub>3</sub>) δ = 7.62–7.59 (m, 2 H, 9-H), 7.21–7.18 (m, 2 H, 8-H), 4.39 (ddt, *J* = 12.2 Hz, 6.2 Hz, 1.4 Hz, 1 H, 2-H), 4.27 (td, *J* = 12.7 Hz, 3.5 Hz, 1 H, 2-H'), 2.95–2.93 (m, 1 H, 6-H), 2.35–2.26 (m, 1 H, 3-H), 2.24–2.21 (m, 1 H, 5-H), 2.19–2.13 (m, 2 H, 4-H, 3-H'); **<sup>13</sup>C NMR** (101 MHz, CDCl<sub>3</sub>) δ = 168.5 (C<sub>q</sub>, C-1), 143.9 (C<sub>q</sub>, C-10), 132.7 (CH, C-9), 127.0 (CH, C-8), 118.6 (C<sub>q</sub>, C-11), 111.1 (C<sub>q</sub>, C-10), 64.6 (CH<sub>2</sub>, C-2), 27.2 (CH, C-5), 24.9 (CH, C-6), 24.4 (CH, C-4), 20.4 (CH<sub>2</sub>, C-3); **HRMS** (EI<sup>+</sup>): Calcd *m/z* for [C<sub>13</sub>H<sub>11</sub>NO<sub>2</sub><sup>+</sup>] [*M*<sup>+</sup>]: 213.0784; Found: 213.0788.

#### 4-(4-Oxo-5-oxaspiro[2.4]heptan-1-yl)benzonitrile (**16**) (RNH382, RM444)

A solution of methylene furanone **4b** (99.9 mg, 1.02 mmol) and the sulfonium salt **7**·HBF<sub>4</sub> (180 mg, 0.679 mmol) in DMSO (5 mL) was mixed with a solution of KOtBu (76.2 mg, 0.679 mmol) in DMSO (2 mL). Aq workup (as described for **12**, RNH389) followed by column chromatography (10 to 50% EtOAc in pentane, silica) furnished **16** (two diastereomers, 67 mg, 46%).

The diastereomeric ratio was determined as **16(D1)/16(D2)** = 1.00/0.23 from the <sup>1</sup>H NMR spectrum of the crude material after aqueous workup.

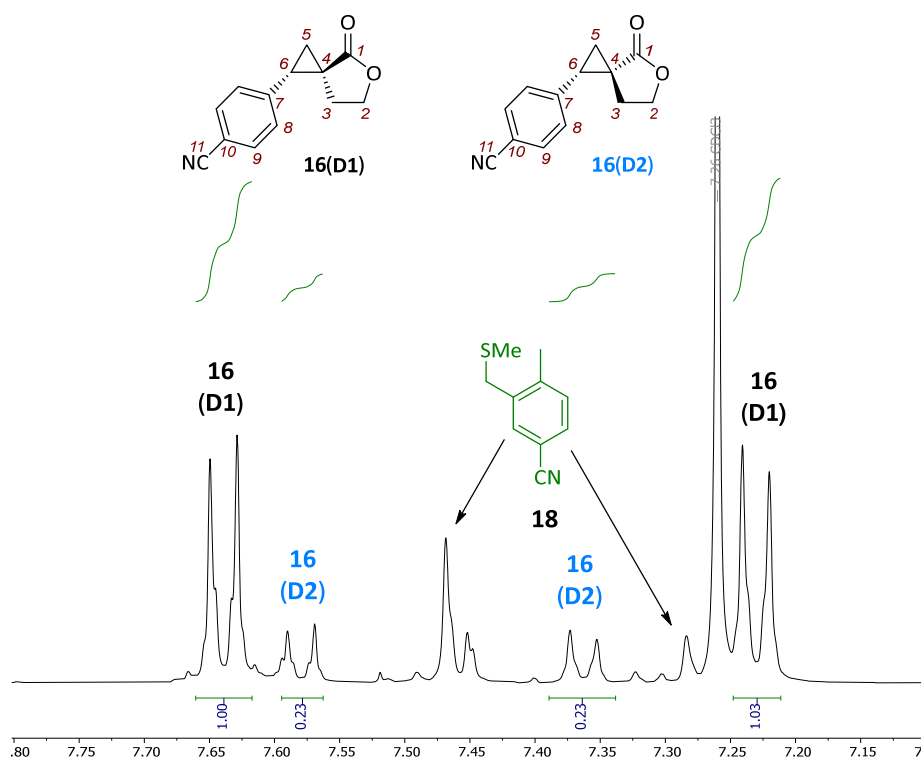

Slow evaporation of a  $\text{CDCl}_3$  solution of **16(D1)** in a separate experiment (RNH444) gave crystals suitable for single crystal X-ray diffraction that allowed for an unambiguous assignment of the relative stereochemistry.

#### 4-((1S,3S)-4-Oxo-5-oxaspiro[2.4]heptan-1-yl)benzonitrile (and enantiomer)

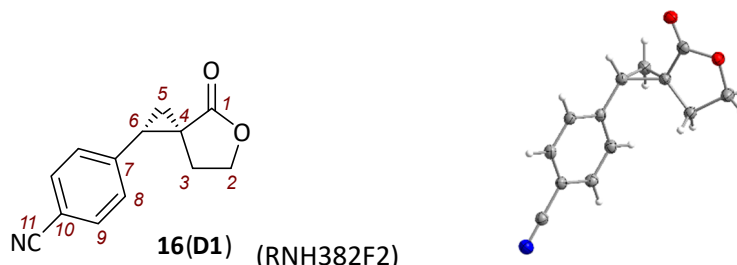

**R<sub>f</sub>** (40% EtOAc in pentane, silica, UV) = 0.43; **Mp** 126–127 °C; **<sup>1</sup>H NMR** (400 MHz,  $\text{CDCl}_3$ )  $\delta$  = 7.65–7.62 (m, 2 H, 9-H), 7.25–7.22 (m, 2 H, 8-H), 4.43 (td,  $J$  = 8.9 Hz, 6.1 Hz, 1 H, 2-H), 4.30 (td,  $J$  = 9.0 Hz, 6.2 Hz, 1 H, 2-H'), 2.79 (dd,  $J$  = 9.3 Hz, 7.1 Hz, 1 H, 6-H), 2.18 (ddd,  $J$  = 13.0 Hz, 8.8 Hz, 6.2 Hz, 1 H, 3-H), 1.92–1.85 (m, 1 H, 3-H', superimposed with resonances of 5-H), 1.88 (dd,  $J$  = 9.3 Hz, 5.2 Hz, 1 H, 5-H, superimposed with resonances of 3-H'), 1.50 (dd,  $J$  = 7.1 Hz, 5.3 Hz, 1 H, 5-H'); **<sup>13</sup>C NMR** (101 MHz,  $\text{CDCl}_3$ )  $\delta$  = 178.6 ( $\text{C}_q$ , C-1), 142.1 ( $\text{C}_q$ , C-7), 132.6 (CH, C-9), 128.8 (CH, C-8), 118.7 ( $\text{C}_q$ , C-11), 111.2 ( $\text{C}_q$ , C-10), 65.9 ( $\text{CH}_2$ , C-2), 30.6 (CH, C-6), 28.4 ( $\text{C}_q$ , C-4), 25.4 ( $\text{CH}_2$ , C-3), 19.2 ( $\text{CH}_2$ , C-5); **IR** (ATR, neat): 3010, 2913, 2223, 1754, 1607, 1508, 1388, 1374, 1226, 1200, 1132, 1118, 1024, 1017, 996, 854, 833, 744, 737  $\text{cm}^{-1}$ ; **HRMS** (EI<sup>+</sup>): Calcd  $m/z$  for  $[\text{C}_{13}\text{H}_{11}\text{NO}_2]^+$  [ $\text{M}^{++}$ ]: 213.0784; Found: 213.0793.

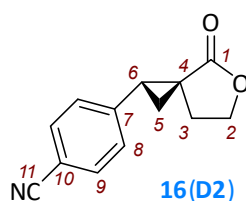

Analytical data for **16(D2)**. **R<sub>f</sub>** (40% EtOAc in pentane, silica, UV) = 0.23; **Mp** 112–114 °C; **<sup>1</sup>H NMR** (400 MHz,  $\text{CDCl}_3$ )  $\delta$  = 7.59–7.56 (m, 2 H, 9-H), 7.38–7.35 (m, 2 H, 8-H), 4.48 (td,  $J$  = 9.0 Hz, 3.3 Hz, 1 H, 2-H), 4.41 (td,  $J$  = 9.2 Hz, 7.5 Hz, 1 H, 2-H'), 2.67–2.60 (m, 2 H, 3-H and 6-H), 2.34 (ddd,  $J$  = 12.9 Hz, 7.5 Hz, 3.3 Hz, 1 H, 3-H'), 1.95 (dd,  $J$  = 7.7 Hz, 5.5 Hz, 1 H, 5-H), 1.63 (dd,  $J$  = 8.8 Hz, 5.5 Hz, 1 H, 5-H'); **<sup>13</sup>C NMR** (101 MHz,  $\text{CDCl}_3$ )  $\delta$  = 175.5 ( $\text{C}_q$ , C-1), 141.0 ( $\text{C}_q$ , C-7), 132.0 (CH, C-9), 129.8 (CH, C-8), 119.0 ( $\text{C}_q$ , C-11), 111.0 ( $\text{C}_q$ , C-10), 65.7 ( $\text{CH}_2$ , C-2), 34.1 (CH, C-6), 31.8 ( $\text{CH}_2$ , C-3), 28.6 ( $\text{C}_q$ , C-4), 17.9 ( $\text{CH}_2$ , C-5); **IR** (ATR, neat): 2922, 2853, 2226, 1749, 1606, 1382, 1372, 1274, 1256, 1192, 1123, 1106, 1027, 1015, 999, 860, 851, 843, 760, 708  $\text{cm}^{-1}$ ; **HRMS** (EI<sup>+</sup>): Calcd  $m/z$  for  $[\text{C}_{13}\text{H}_{11}\text{NO}_2]^+$  [ $\text{M}^{++}$ ]: 213.0784; Found: 213.0782.

#### 4-(4-Oxo-5-oxaspiro[2.5]octan-1-yl)benzonitrile (**17**) (RNH142)

A solution of methylene pyranone **5b** (105.3 mg, 0.939) and the sulfonium salt **7**· $\text{HBF}_4$  (166 mg, 0.626 mmol) in DMSO (5 mL) was mixed with a solution of  $\text{KO}t\text{Bu}$  (70.3 mg, 0.626 mmol) in DMSO (2 mL). Aq workup (as described for **12**, RNH389) followed by column chromatography (5 to 30% EtOAc in pentane, silica) furnished **17** (two diastereomers, in total: 98.1 mg, 69%).

The  $^1\text{H}$  NMR spectrum of the crude material after extraction and removal of solvents indicates a diastereomeric ratio d.r.  $\approx$  1:0.31.

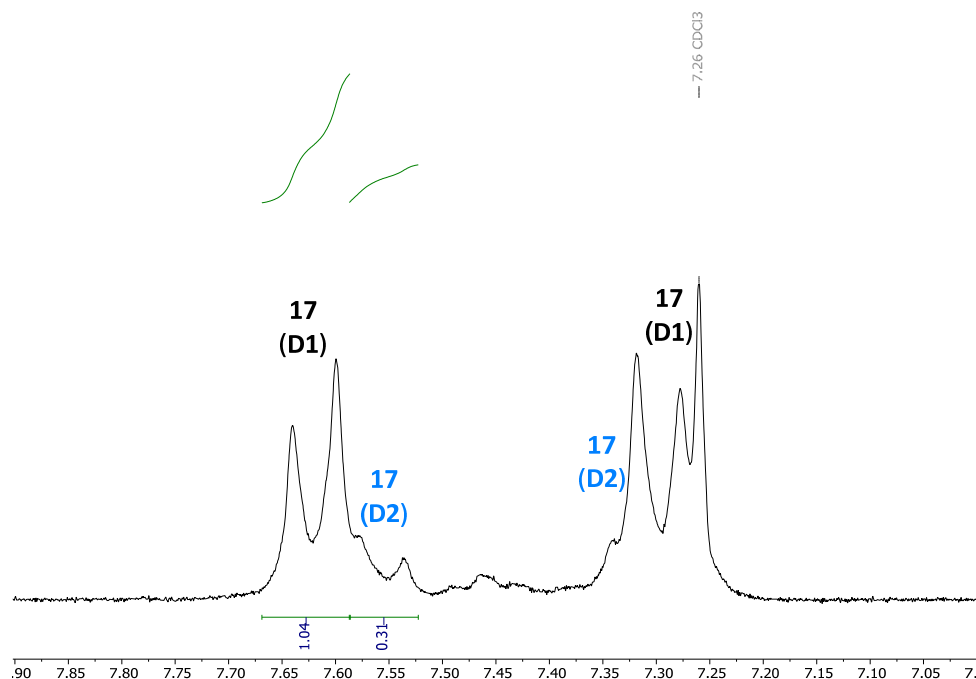

Slow evaporation of a  $\text{CDCl}_3$  solution gave crystals suitable for single crystal X-ray diffraction that allowed for an unambiguous assignment of the stereochemistry of the diastereomers.

#### 4-((1R,3S)-4-Oxo-5-oxaspiro[2.5]octan-1-yl)benzotrile (and enantiomer)

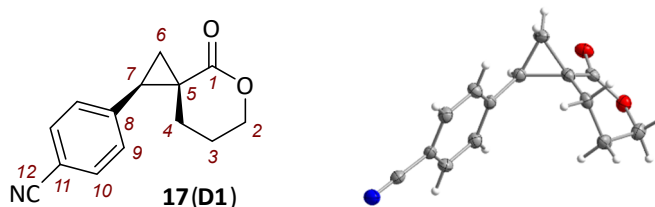

Yield: 79.8 mg as colorless oil which slowly crystallized.  $R_f$  (20% EtOAc in pentane, silica, UV) = 0.26; **Mp** 106–107 °C;  $^1\text{H}$  NMR (400 MHz,  $\text{CDCl}_3$ )  $\delta$  = 7.63–7.60 (m, 2 H, 10-H), 7.32–7.29 (m, 2 H, 9-H), 4.46–4.36 (m, 2 H, 2-H<sub>2</sub>), 3.03 (dd,  $J$  = 9.1 Hz, 7.3 Hz, 1 H, 7-H), 1.96 (dd,  $J$  = 9.1 Hz, 4.8 Hz, 1 H, 6-H), 1.91–1.82 (m, 1 H, 3-H), 1.78–1.69 (m, 1 H, 3-H'), 1.57–1.50 (m, 1 H, 4-H), 1.37–1.28 (m, 1 H, 4-H') 1.29 (dd,  $J$  = 7.3 Hz, 4.9 Hz, 1 H, 6'-H);  $^{13}\text{C}$  NMR (101 MHz,  $\text{CDCl}_3$ )  $\delta$  = 173.5 (C<sub>q</sub>, C-1), 141.8 (C<sub>q</sub>, C-8), 132.3 (CH, C-10), 129.9 (CH, C-9), 118.7 (C<sub>q</sub>, C-12), 111.1 (C<sub>q</sub>, C-11), 70.4 (CH<sub>2</sub>, C-2), 33.7 (CH, C-7), 26.7 (C<sub>q</sub>, C-5), 25.0 (CH<sub>2</sub>, C-4), 23.1 (CH<sub>2</sub>, C-3), 21.8 (CH<sub>2</sub>, C-6); **IR** (ATR, neat): 2954, 2925, 2226, 1711, 1608, 1401, 1298, 1259, 1145, 1006, 850  $\text{cm}^{-1}$ ; **HRMS** (EI): Calcd  $m/z$  for [ $\text{C}_{14}\text{H}_{13}\text{NO}_2$ ]<sup>+</sup> [ $\text{M}^{*+}$ ]: 227.0941; Found: 227.0934.

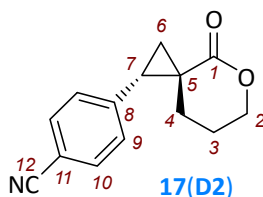

Analytical data for **17(D2)**. Yield: 18.3 mg as colorless crystalline solid.  $R_f$  (20% EtOAc in pentane, silica, UV): 0.18; **Mp** 136–137 °C;  $^1\text{H}$  NMR (400 MHz,  $\text{CDCl}_3$ )  $\delta$  = 7.58–7.55 (m, 2 H, 10-H), 7.35–7.32 (m, 2 H,

9-H), 4.40–4.36 (m, 2 H, 2-H<sub>2</sub>), 2.39 (t, *J* = 8.1 Hz, 1 H, 7-H), 2.27 (ddd, *J* = 13.9 Hz, 9.4 Hz, 5.1 Hz, 1 H, 4-H), 2.17 (dd, *J* = 7.6 Hz, 5.3 Hz, 1 H, 6-H), 2.16–2.00 (m, 2 H, 3-H<sub>2</sub>), 1.71 (dt, *J* = 13.6, 5.4 Hz, 1 H, 4-H'), 1.34 (dd, *J* = 8.6, 5.3 Hz, 1 H, 6-H'); <sup>13</sup>C NMR (101 MHz, CDCl<sub>3</sub>) δ = 169.7 (C<sub>q</sub>, C-1), 141.5 (C<sub>q</sub>, C-8), 132.0 (CH, C-9), 129.9 (CH, C-10), 119.0 (C<sub>q</sub>, C-12), 110.8 (C<sub>q</sub>, C-11), 69.8 (CH<sub>2</sub>, C-2), 37.3 (CH, C-7), 31.4 (CH<sub>2</sub>, C-4), 30.5 (C<sub>q</sub>, C-5), 23.4 (CH<sub>2</sub>, C-3), 19.2 (CH<sub>2</sub>, C-6); IR (ATR, neat): 2923, 2853, 2225, 1715, 1608, 1401, 1350, 1276, 1138, 1067, 1017, 845, 728 cm<sup>-1</sup>; HRMS (EI<sup>+</sup>): Calcd *m/z* for [C<sub>14</sub>H<sub>13</sub>NO<sub>2</sub><sup>+</sup>] [M<sup>+</sup>]: 227.0941; Found: 227.0934.

### Cyclopropanation of Parthenolide (RNH378)

A solution of parthenolide **22** (100 mg, 0.40 mmol) and the sulfonium salt **7**·HBF<sub>4</sub> (107 mg, 0.40 mmol) in DMSO (5 mL) was mixed with a solution of KO<sup>t</sup>Bu (45.2 mg, 0.40 mmol) in DMSO (2 mL). Aq workup (as described for **12**, RNH389) followed by preparative TLC (30% EtOAc in pentane, silica) delivered a mixture of the two major diastereomers (d.r. = 1:0.85, from the <sup>1</sup>H NMR spectrum, see below). Subsequent crystallization through slow diffusion of diethyl ether into a CDCl<sub>3</sub> solution yielded **26** (21.2 mg, 14%).

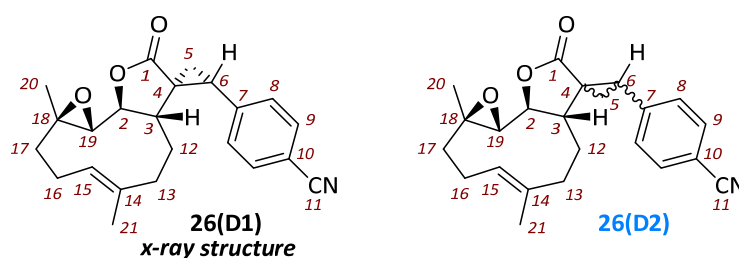

<sup>1</sup>H NMR spectrum of the aromatic region of the crude product:

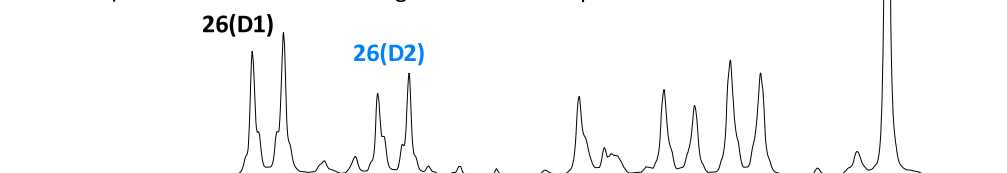

<sup>1</sup>H NMR spectrum of the isolated mixture of diastereoisomers (d.r. = 1 : 0.85):

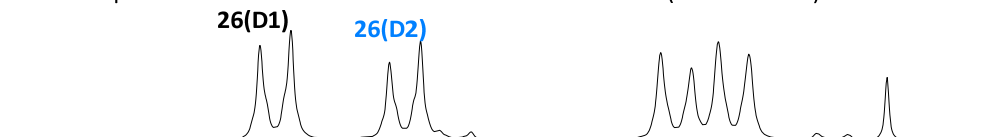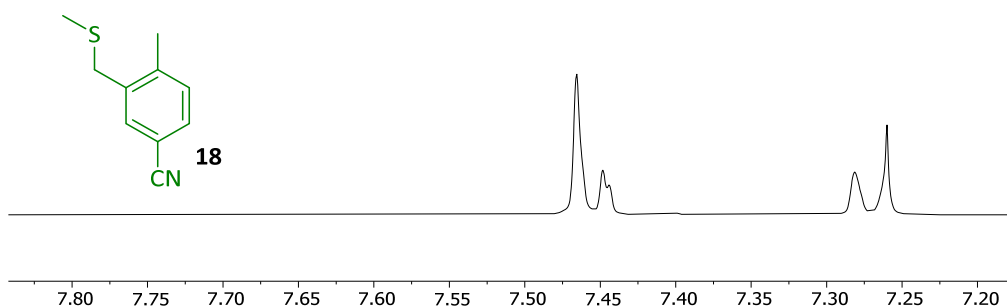

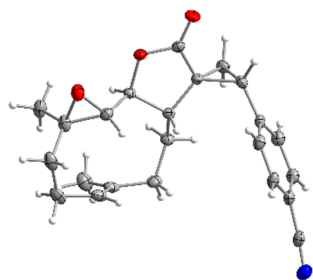

X-ray crystal structure of **26(D1)** arbitrarily taken from the diastereomeric mixture of crystalline material.

Due to superimposed resonances in the NMR spectra, we were not able to assign the stereochemistry of **26(D2)**.

**R<sub>f</sub>** (30% EtOAc in pentane, silica, UV) = 0.29; **Mp** 209-210 °C; **<sup>1</sup>H NMR** (400 MHz, CDCl<sub>3</sub>) δ = 7.67 (d, *J* = 8.3 Hz, 2 H, 9-H<sup>D1</sup>), 7.58 (d, *J* = 8.3 Hz, 2 H, 9-H<sup>D2</sup>), 7.40 (d, *J* = 8.1 Hz, 2 H, 8-H<sup>D2</sup>), 7.36 (d, *J* = 8.1 Hz, 2 H, 8-H<sup>D1</sup>), 5.22 (d, *J* = 11.1 Hz, 1 H, 15-H<sup>D2</sup>), 4.94 (d, *J* = 11.1 Hz, 1 H, 15-H<sup>D1</sup>), 3.98–3.92 (m, 1 H, 2-H<sup>D1</sup> and 1 H, 2-H<sup>D2</sup>), 2.91 (dd, *J* = 9.3 Hz, 7.2 Hz, 1 H, 6-H<sup>D1</sup>), 2.85 (d, *J* = 8.7 Hz, 1 H, 19-H<sup>D2</sup>), 2.72 (d, *J* = 8.8 Hz, 1 H, 19-H<sup>D1</sup>), 2.65 (t, *J* = 9.5 Hz, 1 H, 3-H<sup>D2</sup>), 2.46–2.26 (m, 1 H, 16-H<sup>D1</sup> and 3 H, 6-H<sup>D2</sup>, 13-H<sup>D2</sup>, 16-H<sup>D2</sup>), 2.21–2.08 (m, 2 H, 16-H<sup>D1</sup>, 17-H<sup>D1</sup> and 3 H, 13-H<sup>D2</sup>, 16-H<sup>D2</sup>, 17-H<sup>D2</sup>), 2.02 (t, *J* = 8.7 Hz, 1 H, 3-H<sup>D1</sup>), 1.73–1.55 (m, 6 H, 5-H<sup>D1</sup>, 13-H<sup>D1</sup>, 21-H<sup>D1</sup> and 6 H, 5-H<sup>D2</sup>, 12-H<sup>D2</sup>, 21-H<sup>D2</sup>), 1.37–1.17 (m, 5 H, 12-H<sup>D1</sup>, 17-H<sup>D1</sup>, 20-H<sup>D1</sup> and 5 H, 12-H<sup>D2</sup>, 17-H<sup>D2</sup>, 20-H<sup>D2</sup>), 0.98–0.86 (m, 2 H, 12-H<sup>D1</sup>, 13-H<sup>D1</sup>); **<sup>13</sup>C NMR** (101 MHz, CDCl<sub>3</sub>) δ = 177.6 (C<sub>q</sub>, C-1<sup>D1</sup>), 174.9 (C<sub>q</sub>, C-1<sup>D2</sup>), 140.6 (C<sub>q</sub>, C-7<sup>D1</sup>), 140.5 (C<sub>q</sub>, C-7<sup>D2</sup>), 134.3 (C<sub>q</sub>, C-14<sup>D2</sup>), 134.2 (C<sub>q</sub>, C-14<sup>D1</sup>), 132.6 (CH, C-9<sup>D1</sup>), 131.8 (CH, C-9<sup>D2</sup>), 130.2 (CH, C-8<sup>D1</sup>), 130.1 (CH, C-8<sup>D2</sup>), 126.0 (CH, C-15<sup>D2</sup>), 125.1 (CH, C-15<sup>D1</sup>), 119.1 (C<sub>q</sub>, C-11<sup>D2</sup>), 118.6 (C<sub>q</sub>, C-11<sup>D1</sup>), 111.4 (C<sub>q</sub>, C-10<sup>D1</sup>), 110.8 (C<sub>q</sub>, C-10<sup>D2</sup>), 83.0 (CH, C-2<sup>D1</sup>), 81.9 (CH, C-2<sup>D2</sup>), 66.8 (CH, C-19<sup>D1</sup>), 66.5 (CH, C-19<sup>D2</sup>), 61.8 (C<sub>q</sub>, C-18<sup>D2</sup>), 61.7 (C<sub>q</sub>, C-18<sup>D1</sup>), 47.3 (CH, C-3<sup>D2</sup>), 43.5 (CH, C-3<sup>D1</sup>), 41.2 (CH<sub>2</sub>, C-13<sup>D2</sup>), 40.0 (CH<sub>2</sub>, C-13<sup>D1</sup>), 36.6 (CH<sub>2</sub>, C-17<sup>D2</sup>), 36.4 (CH<sub>2</sub>, C-17<sup>D1</sup>), 31.4 (C<sub>q</sub>, C-4<sup>D1</sup>), 31.0 (C<sub>q</sub>, C-4<sup>D2</sup>), 28.9 (CH<sub>2</sub>, C-12<sup>D1</sup>), 28.2 (CH, C-6<sup>D1</sup>), 27.7 (CH, C-6<sup>D2</sup>), 26.9 (CH<sub>2</sub>, C-12<sup>D2</sup>), 24.3 (CH<sub>2</sub>, C-16<sup>D2</sup>), 24.1 (CH<sub>2</sub>, C-16<sup>D1</sup>), 17.4 (CH<sub>3</sub>, C-20<sup>D2</sup>), 17.3 (CH<sub>3</sub>, C-20<sup>D1</sup>), 17.1 (CH<sub>3</sub>, C-21<sup>D1</sup>), 17.0 (CH<sub>2</sub>, C-5<sup>D2</sup>), 16.9 (CH<sub>3</sub>, C-21<sup>D2</sup>), 15.9 (CH<sub>2</sub>, C-5<sup>D1</sup>); **HRMS** (EI<sup>+</sup>): Calcd *m/z* for [C<sub>23</sub>H<sub>25</sub>NO<sub>3</sub><sup>+</sup>] [M<sup>+</sup>]: 363.1829; Found: 363.1832.



## Kinetics with Reference Nucleophiles

### Reactions of cyclopentenone (**1a**) with reference nucleophiles

**1a** + **6a** (from **6a**·HCl + 1 equiv KOTBu) in DMSO (conventional UV/Vis, detection at 427 nm) RM1005

| [ <b>6a</b> ] <sub>0</sub> , M | [ <b>1a</b> ] <sub>0</sub> , M | <i>k</i> <sub>obs</sub> , s <sup>-1</sup> |
|--------------------------------|--------------------------------|-------------------------------------------|
| 1.00 × 10 <sup>-4</sup>        | 2.88 × 10 <sup>-3</sup>        | 4.62 × 10 <sup>-3</sup>                   |
| 1.00 × 10 <sup>-4</sup>        | 4.26 × 10 <sup>-3</sup>        | 6.66 × 10 <sup>-3</sup>                   |
| 1.00 × 10 <sup>-4</sup>        | 5.78 × 10 <sup>-3</sup>        | 8.75 × 10 <sup>-3</sup>                   |
| 1.00 × 10 <sup>-4</sup>        | 7.19 × 10 <sup>-3</sup>        | 1.12 × 10 <sup>-2</sup>                   |

$$k_2 = 1.51 \pm 0.05 \text{ M}^{-1} \text{ s}^{-1}$$

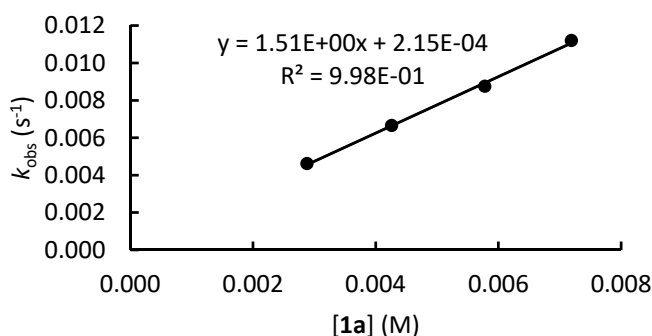

**1a** + **7** (from **7**·HBF<sub>4</sub> + 1 equiv KOTBu) in DMSO (conventional UV/Vis, detection at 378 nm) RM1005

| [ <b>7</b> ] <sub>0</sub> , M | [ <b>1a</b> ] <sub>0</sub> , M | <i>k</i> <sub>obs</sub> , s <sup>-1</sup> |
|-------------------------------|--------------------------------|-------------------------------------------|
| 1.00 × 10 <sup>-4</sup>       | 2.89 × 10 <sup>-3</sup>        | 3.89 × 10 <sup>-3</sup>                   |
| 1.00 × 10 <sup>-4</sup>       | 4.75 × 10 <sup>-3</sup>        | 5.94 × 10 <sup>-3</sup>                   |
| 1.00 × 10 <sup>-4</sup>       | 6.52 × 10 <sup>-3</sup>        | 8.04 × 10 <sup>-3</sup>                   |
| 1.00 × 10 <sup>-4</sup>       | 8.27 × 10 <sup>-3</sup>        | 9.51 × 10 <sup>-3</sup>                   |

$$k_2 = 1.06 \pm 0.05 \text{ M}^{-1} \text{ s}^{-1}$$

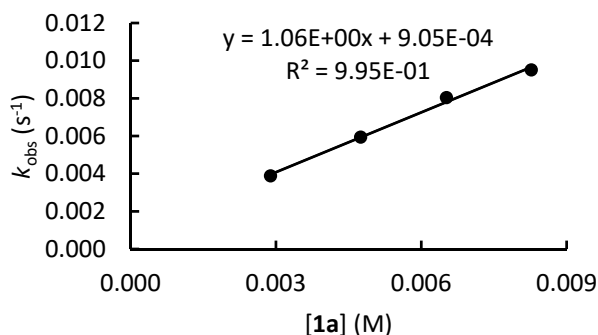

**1a** + **6c** (from **6c**·HBr + 1 equiv KOTBu) in DMSO (sequential mixing stopped-flow, detection at 425 nm)

RM1005

| [ <b>6c</b> ] <sub>0</sub> , M | [ <b>1a</b> ] <sub>0</sub> , M | <i>k</i> <sub>obs</sub> , s <sup>-1</sup> |                         |                         |                         |                         | average |
|--------------------------------|--------------------------------|-------------------------------------------|-------------------------|-------------------------|-------------------------|-------------------------|---------|
|                                |                                | 1                                         | 2                       | 3                       | 4                       |                         |         |
| 1.00 × 10 <sup>-4</sup>        | 1.00 × 10 <sup>-3</sup>        | 1.66 × 10 <sup>-1</sup>                   | 1.66 × 10 <sup>-1</sup> | 1.65 × 10 <sup>-1</sup> | 1.66 × 10 <sup>-1</sup> | 1.66 × 10 <sup>-1</sup> |         |
| 1.00 × 10 <sup>-4</sup>        | 2.00 × 10 <sup>-3</sup>        | 3.22 × 10 <sup>-1</sup>                   | 3.28 × 10 <sup>-1</sup> | 3.19 × 10 <sup>-1</sup> | 3.22 × 10 <sup>-1</sup> | 3.23 × 10 <sup>-1</sup> |         |
| 1.00 × 10 <sup>-4</sup>        | 3.00 × 10 <sup>-3</sup>        | 4.91 × 10 <sup>-1</sup>                   | 4.94 × 10 <sup>-1</sup> | 4.93 × 10 <sup>-1</sup> | 4.89 × 10 <sup>-1</sup> | 4.92 × 10 <sup>-1</sup> |         |
| 1.00 × 10 <sup>-4</sup>        | 4.00 × 10 <sup>-3</sup>        | 6.47 × 10 <sup>-1</sup>                   | 6.59 × 10 <sup>-1</sup> | 6.54 × 10 <sup>-1</sup> | 6.52 × 10 <sup>-1</sup> | 6.53 × 10 <sup>-1</sup> |         |
| 1.00 × 10 <sup>-4</sup>        | 5.00 × 10 <sup>-3</sup>        | 8.05 × 10 <sup>-1</sup>                   | 8.06 × 10 <sup>-1</sup> | 8.16 × 10 <sup>-1</sup> | 8.18 × 10 <sup>-1</sup> | 8.11 × 10 <sup>-1</sup> |         |

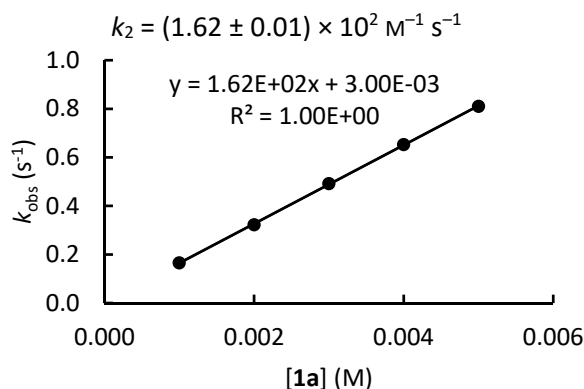

## Reactions of 2-methylcyclopentenone (**1b**) with reference nucleophiles

**1b** + **6a** (from **6a**·HCl + 1 equiv KOTBu) in DMSO (conventional UV/Vis, detection at 427 nm) RM885

| [ <b>6a</b> ] <sub>0</sub> , M | [ <b>1b</b> ] <sub>0</sub> , M | <i>k</i> <sub>obs</sub> , s <sup>-1</sup> |
|--------------------------------|--------------------------------|-------------------------------------------|
| 1.00 × 10 <sup>-4</sup>        | 3.91 × 10 <sup>-3</sup>        | 5.80 × 10 <sup>-4</sup>                   |
| 1.00 × 10 <sup>-4</sup>        | 5.85 × 10 <sup>-3</sup>        | 6.67 × 10 <sup>-4</sup>                   |
| 1.00 × 10 <sup>-4</sup>        | 7.77 × 10 <sup>-3</sup>        | 7.26 × 10 <sup>-4</sup>                   |
| 1.00 × 10 <sup>-4</sup>        | 9.68 × 10 <sup>-3</sup>        | 7.97 × 10 <sup>-4</sup>                   |

$$k_2 = (3.69 \pm 0.19) \times 10^{-2} \text{ M}^{-1} \text{ s}^{-1}$$

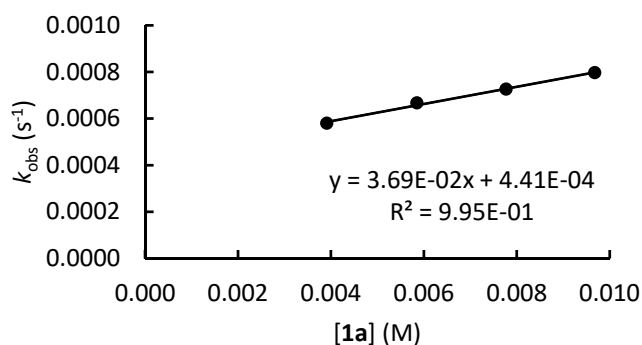

**1b** + **7** (from **7**·HBF<sub>4</sub> + 1 equiv KOTBu) in DMSO (conventional UV/Vis, detection at 378 nm) RM892

| [ <b>7</b> ] <sub>0</sub> , M | [ <b>1b</b> ] <sub>0</sub> , M | <i>k</i> <sub>obs</sub> , s <sup>-1</sup> |
|-------------------------------|--------------------------------|-------------------------------------------|
| 1.00 × 10 <sup>-4</sup>       | 9.81 × 10 <sup>-4</sup>        | 9.00 × 10 <sup>-4</sup>                   |
| 1.00 × 10 <sup>-4</sup>       | 1.47 × 10 <sup>-3</sup>        | 1.44 × 10 <sup>-3</sup>                   |
| 1.00 × 10 <sup>-4</sup>       | 1.96 × 10 <sup>-3</sup>        | 1.91 × 10 <sup>-3</sup>                   |
| 1.00 × 10 <sup>-4</sup>       | 2.45 × 10 <sup>-3</sup>        | 2.46 × 10 <sup>-3</sup>                   |

$$k_2 = 1.05 \pm 0.02 \text{ M}^{-1} \text{ s}^{-1}$$

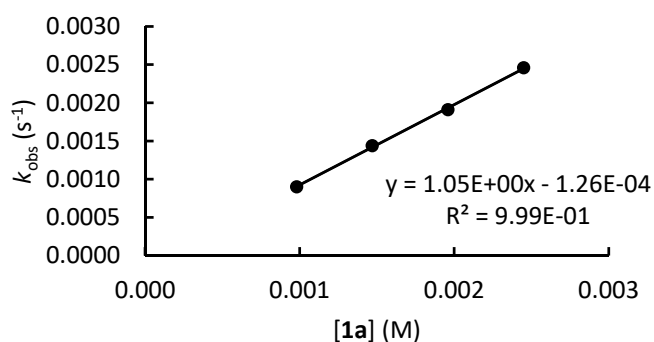

**1b** + **6c** (from **6c**·HBr + 1 equiv KOTBu) in DMSO (conventional UV/Vis, detection at 425 nm) RM902

| [ <b>6c</b> ] <sub>0</sub> , M | [ <b>1b</b> ] <sub>0</sub> , M | <i>k</i> <sub>obs</sub> , s <sup>-1</sup> |
|--------------------------------|--------------------------------|-------------------------------------------|
| 1.00 × 10 <sup>-4</sup>        | 9.82 × 10 <sup>-4</sup>        | 8.75 × 10 <sup>-3</sup>                   |
| 1.00 × 10 <sup>-4</sup>        | 1.96 × 10 <sup>-3</sup>        | 1.92 × 10 <sup>-2</sup>                   |
| 1.00 × 10 <sup>-4</sup>        | 2.93 × 10 <sup>-3</sup>        | 2.65 × 10 <sup>-2</sup>                   |
| 1.00 × 10 <sup>-4</sup>        | 3.90 × 10 <sup>-3</sup>        | 3.17 × 10 <sup>-2</sup>                   |

$$k_2 = 7.83 \pm 0.85 \text{ M}^{-1} \text{ s}^{-1}$$

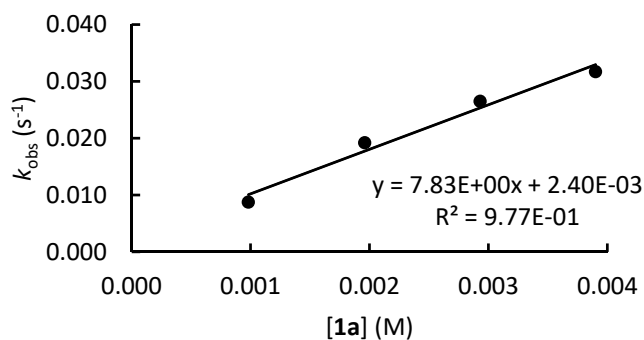

### Reactions of 3-methylcyclopentenone (1c) with reference nucleophiles

1c + 6c (from 6c·HBr + 1 equiv KOTBu) in DMSO (conventional UV/Vis, detection at 425 nm) RM1022

| [6c] <sub>0</sub> , M   | [1c] <sub>0</sub> , M   | k <sub>obs</sub> , s <sup>-1</sup> |
|-------------------------|-------------------------|------------------------------------|
| 1.00 × 10 <sup>-4</sup> | 3.86 × 10 <sup>-3</sup> | 1.41 × 10 <sup>-3</sup>            |
| 1.00 × 10 <sup>-4</sup> | 5.77 × 10 <sup>-3</sup> | 1.61 × 10 <sup>-3</sup>            |
| 1.00 × 10 <sup>-4</sup> | 7.68 × 10 <sup>-3</sup> | 1.89 × 10 <sup>-3</sup>            |
| 1.00 × 10 <sup>-4</sup> | 9.58 × 10 <sup>-3</sup> | 2.30 × 10 <sup>-3</sup>            |

$$k_2 = (1.55 \pm 0.18) \times 10^{-1} \text{ M}^{-1} \text{ s}^{-1}$$

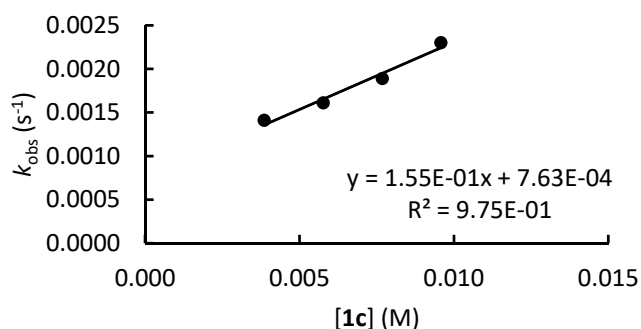

### Reactions of cyclohexenone (2a) with reference nucleophiles

2a + 6a (from 6a·HCl + 1 equiv KOTBu) in DMSO (conventional UV/Vis, detection at 427 nm) RM488

| [6a] <sub>0</sub> , M   | [2a] <sub>0</sub> , M   | k <sub>obs</sub> , s <sup>-1</sup> |
|-------------------------|-------------------------|------------------------------------|
| 1.00 × 10 <sup>-4</sup> | 3.91 × 10 <sup>-3</sup> | 2.93 × 10 <sup>-4</sup>            |
| 1.00 × 10 <sup>-4</sup> | 5.83 × 10 <sup>-3</sup> | 4.17 × 10 <sup>-4</sup>            |
| 1.00 × 10 <sup>-4</sup> | 7.76 × 10 <sup>-3</sup> | 5.64 × 10 <sup>-4</sup>            |
| 1.00 × 10 <sup>-4</sup> | 9.67 × 10 <sup>-3</sup> | 7.31 × 10 <sup>-4</sup>            |

$$k_2 = (7.60 \pm 0.36) \times 10^{-2} \text{ M}^{-1} \text{ s}^{-1}$$

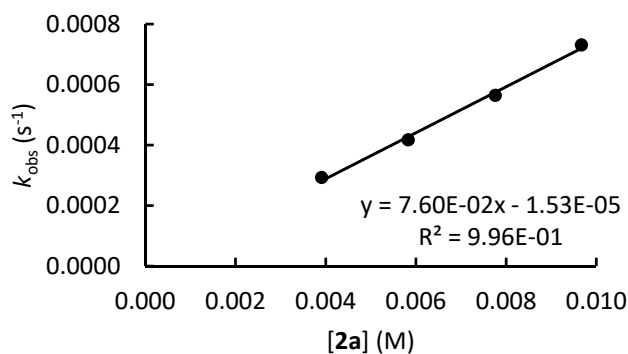

2a + 7 (from 7·HBF<sub>4</sub> + 1 equiv KOTBu) in DMSO (conventional UV/Vis, detection at 378 nm) RM497

| [7] <sub>0</sub> , M    | [2a] <sub>0</sub> , M   | k <sub>obs</sub> , s <sup>-1</sup> |
|-------------------------|-------------------------|------------------------------------|
| 1.00 × 10 <sup>-4</sup> | 3.91 × 10 <sup>-3</sup> | 2.84 × 10 <sup>-3</sup>            |
| 1.00 × 10 <sup>-4</sup> | 7.77 × 10 <sup>-3</sup> | 4.94 × 10 <sup>-3</sup>            |
| 1.00 × 10 <sup>-4</sup> | 9.65 × 10 <sup>-3</sup> | 5.79 × 10 <sup>-3</sup>            |
| 1.00 × 10 <sup>-4</sup> | 1.16 × 10 <sup>-2</sup> | 6.83 × 10 <sup>-3</sup>            |

$$k_2 = (5.16 \pm 0.12) \times 10^{-1} \text{ M}^{-1} \text{ s}^{-1}$$

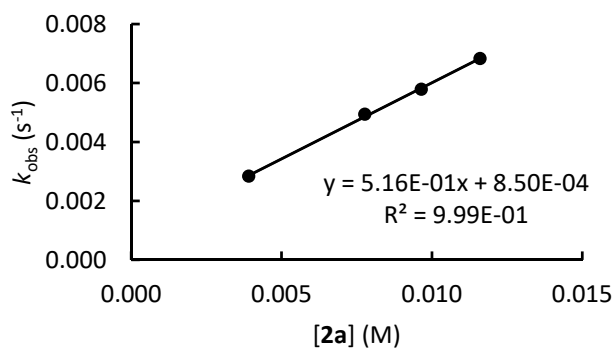

**2a + 6c** (from **6c**·HBr + 1 equiv KOTBu) in DMSO (sequential mixing stopped-flow – 1 measurement per concentration, detection at 425 nm) RM1002

| [ <b>6c</b> ] <sub>0</sub> , M | [ <b>2a</b> ] <sub>0</sub> , M | <i>k</i> <sub>obs</sub> , s <sup>-1</sup> |
|--------------------------------|--------------------------------|-------------------------------------------|
| 1.00 × 10 <sup>-4</sup>        | 2.00 × 10 <sup>-3</sup>        | 2.06 × 10 <sup>-2</sup>                   |
| 1.00 × 10 <sup>-4</sup>        | 3.00 × 10 <sup>-3</sup>        | 3.11 × 10 <sup>-2</sup>                   |
| 1.00 × 10 <sup>-4</sup>        | 4.00 × 10 <sup>-3</sup>        | 4.16 × 10 <sup>-2</sup>                   |
| 1.00 × 10 <sup>-4</sup>        | 5.00 × 10 <sup>-3</sup>        | 5.26 × 10 <sup>-2</sup>                   |

$$k_2 = (1.07 \pm 0.01) \times 10^1 \text{ M}^{-1} \text{ s}^{-1}$$

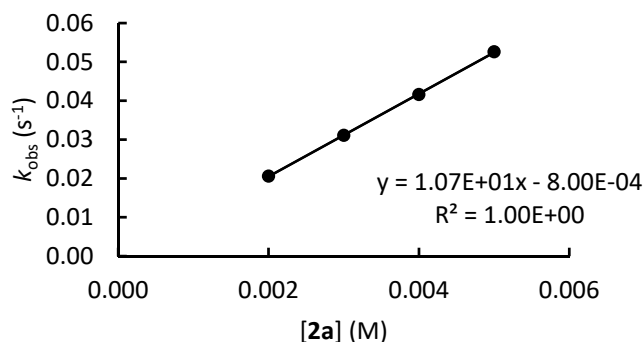

### Reactions of 2-methylcyclohexenone (**2b**) with reference nucleophiles

**2b + 6c** (from **6c**·HBr + 1 equiv KOTBu) in DMSO (conventional UV/Vis, detection at 425 nm) RM1047

| [ <b>6c</b> ] <sub>0</sub> , M | [ <b>2b</b> ] <sub>0</sub> , M | <i>k</i> <sub>obs</sub> , s <sup>-1</sup> |
|--------------------------------|--------------------------------|-------------------------------------------|
| 1.00 × 10 <sup>-4</sup>        | 5.79 × 10 <sup>-3</sup>        | 2.89 × 10 <sup>-3</sup>                   |
| 1.00 × 10 <sup>-4</sup>        | 7.70 × 10 <sup>-3</sup>        | 4.06 × 10 <sup>-3</sup>                   |
| 1.00 × 10 <sup>-4</sup>        | 9.62 × 10 <sup>-3</sup>        | 5.12 × 10 <sup>-3</sup>                   |
| 1.00 × 10 <sup>-4</sup>        | 1.15 × 10 <sup>-2</sup>        | 5.71 × 10 <sup>-3</sup>                   |

$$k_2 = (5.00 \pm 0.49) \times 10^{-1} \text{ M}^{-1} \text{ s}^{-1}$$

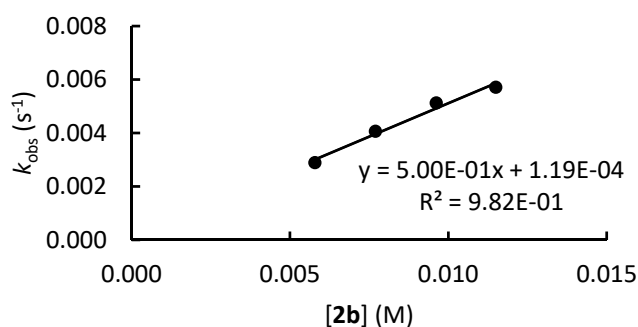

### Reactions of 3-methylcyclohexenone (**2c**) with reference nucleophiles

**2c + 6c** (from **6c**·HBr + 1 equiv KOTBu) in DMSO (conventional UV/Vis, detection at 425 nm) RM901

| [ <b>6c</b> ] <sub>0</sub> , M | [ <b>2c</b> ] <sub>0</sub> , M | <i>k</i> <sub>obs</sub> , s <sup>-1</sup> |
|--------------------------------|--------------------------------|-------------------------------------------|
| 1.00 × 10 <sup>-4</sup>        | 8.81 × 10 <sup>-3</sup>        | 7.97 × 10 <sup>-4</sup>                   |
| 1.00 × 10 <sup>-4</sup>        | 1.17 × 10 <sup>-2</sup>        | 9.54 × 10 <sup>-4</sup>                   |
| 1.00 × 10 <sup>-4</sup>        | 1.46 × 10 <sup>-2</sup>        | 1.18 × 10 <sup>-3</sup>                   |
| 1.00 × 10 <sup>-4</sup>        | 1.72 × 10 <sup>-2</sup>        | 1.54 × 10 <sup>-3</sup>                   |

$$k_2 = (8.70 \pm 1.31) \times 10^{-2} \text{ M}^{-1} \text{ s}^{-1}$$

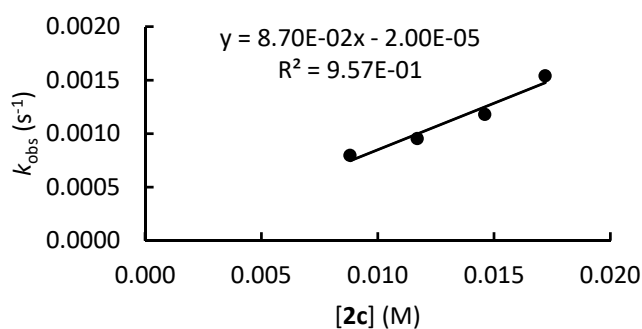

### Reactions of cycloheptenone (**3**) with reference nucleophiles

**3** + **6a** (from **6a**·HCl + 1 equiv K<sub>Ot</sub>Bu) in DMSO (conventional UV/Vis, detection at 427 nm) RM559

| [ <b>6a</b> ] <sub>0</sub> , M | [ <b>3</b> ] <sub>0</sub> , M | <i>k</i> <sub>obs</sub> , s <sup>-1</sup> |
|--------------------------------|-------------------------------|-------------------------------------------|
| 1.00 × 10 <sup>-4</sup>        | 7.70 × 10 <sup>-3</sup>       | 7.59 × 10 <sup>-4</sup>                   |
| 1.00 × 10 <sup>-4</sup>        | 9.57 × 10 <sup>-3</sup>       | 9.48 × 10 <sup>-4</sup>                   |
| 1.00 × 10 <sup>-4</sup>        | 1.14 × 10 <sup>-2</sup>       | 1.08 × 10 <sup>-3</sup>                   |
| 1.00 × 10 <sup>-4</sup>        | 1.33 × 10 <sup>-2</sup>       | 1.22 × 10 <sup>-3</sup>                   |

$$k_2 = (8.13 \pm 0.49) \times 10^{-2} \text{ M}^{-1} \text{ s}^{-1}$$

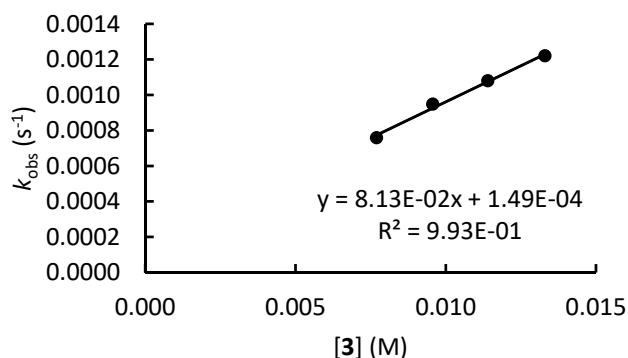

**3** + **7** (from **7**·HBF<sub>4</sub> + 1 equiv K<sub>Ot</sub>Bu) in DMSO (conventional UV/Vis, detection at 378 nm) RM558

| [ <b>7</b> ] <sub>0</sub> , M | [ <b>3</b> ] <sub>0</sub> , M | <i>k</i> <sub>obs</sub> , s <sup>-1</sup> |
|-------------------------------|-------------------------------|-------------------------------------------|
| 1.00 × 10 <sup>-4</sup>       | 4.84 × 10 <sup>-3</sup>       | 3.86 × 10 <sup>-3</sup>                   |
| 1.00 × 10 <sup>-4</sup>       | 6.77 × 10 <sup>-3</sup>       | 4.73 × 10 <sup>-3</sup>                   |
| 1.00 × 10 <sup>-4</sup>       | 7.76 × 10 <sup>-3</sup>       | 5.33 × 10 <sup>-3</sup>                   |
| 1.00 × 10 <sup>-4</sup>       | 1.15 × 10 <sup>-2</sup>       | 7.36 × 10 <sup>-3</sup>                   |

$$k_2 = (5.31 \pm 0.17) \times 10^{-1} \text{ M}^{-1} \text{ s}^{-1}$$

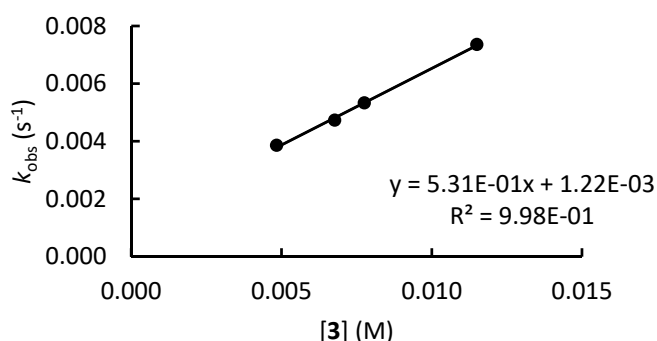

**3** + **6c** (from **6c**·HBr + 1 equiv K<sub>Ot</sub>Bu) in DMSO (sequential mixing stopped-flow, 1 repeat per concentration, detection at 425 nm) RM561

| [ <b>6c</b> ] <sub>0</sub> , M | [ <b>3</b> ] <sub>0</sub> , M | <i>k</i> <sub>obs</sub> , s <sup>-1</sup> |
|--------------------------------|-------------------------------|-------------------------------------------|
| 1.00 × 10 <sup>-4</sup>        | 1.00 × 10 <sup>-3</sup>       | 7.60 × 10 <sup>-3</sup>                   |
| 1.00 × 10 <sup>-4</sup>        | 2.00 × 10 <sup>-3</sup>       | 1.69 × 10 <sup>-2</sup>                   |
| 1.00 × 10 <sup>-4</sup>        | 3.00 × 10 <sup>-3</sup>       | 3.16 × 10 <sup>-2</sup>                   |
| 1.00 × 10 <sup>-4</sup>        | 4.00 × 10 <sup>-3</sup>       | 4.37 × 10 <sup>-2</sup>                   |
| 1.00 × 10 <sup>-4</sup>        | 5.00 × 10 <sup>-3</sup>       | 5.36 × 10 <sup>-2</sup>                   |

$$k_2 = (1.19 \pm 0.05) \times 10^1 \text{ M}^{-1} \text{ s}^{-1}$$

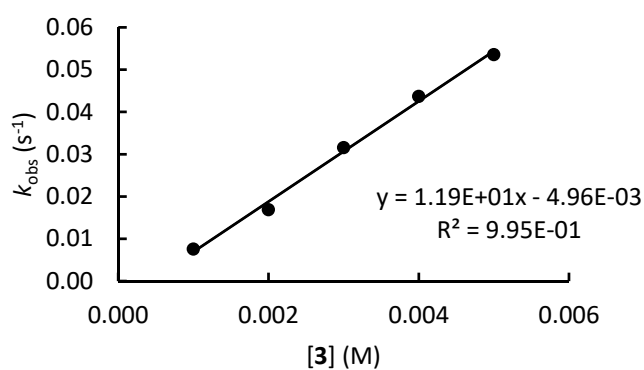

### Reactions of furanone (4a) with reference nucleophiles

**4a + 6a** (from 6a·HCl + 1 equiv KOTBu) in DMSO (conventional UV/Vis, detection at 427 nm) RM493

| [6a] <sub>0</sub> , M   | [4a] <sub>0</sub> , M   | k <sub>obs</sub> , s <sup>-1</sup> |
|-------------------------|-------------------------|------------------------------------|
| 1.00 × 10 <sup>-4</sup> | 1.96 × 10 <sup>-3</sup> | 8.83 × 10 <sup>-4</sup>            |
| 1.00 × 10 <sup>-4</sup> | 2.93 × 10 <sup>-3</sup> | 1.27 × 10 <sup>-3</sup>            |
| 1.00 × 10 <sup>-4</sup> | 3.91 × 10 <sup>-3</sup> | 1.74 × 10 <sup>-3</sup>            |
| 1.00 × 10 <sup>-4</sup> | 4.82 × 10 <sup>-3</sup> | 2.06 × 10 <sup>-3</sup>            |
| 1.00 × 10 <sup>-4</sup> | 5.83 × 10 <sup>-3</sup> | 2.48 × 10 <sup>-3</sup>            |

$$k_2 = (4.14 \pm 0.10) \times 10^{-1} \text{ M}^{-1} \text{ s}^{-1}$$

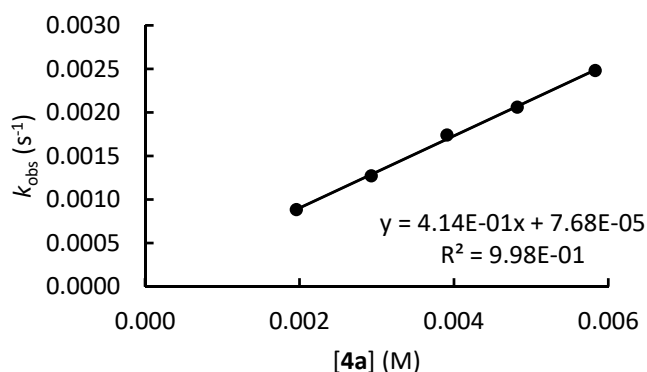

**4a + 7** (from 7·HBF<sub>4</sub> + 1 equiv KOTBu) in DMSO (conventional UV/Vis, detection at 378 nm) RM442

| [7] <sub>0</sub> , M    | [4a] <sub>0</sub> , M   | k <sub>obs</sub> , s <sup>-1</sup> |
|-------------------------|-------------------------|------------------------------------|
| 1.00 × 10 <sup>-4</sup> | 9.87 × 10 <sup>-4</sup> | 3.12 × 10 <sup>-3</sup>            |
| 1.00 × 10 <sup>-4</sup> | 1.97 × 10 <sup>-3</sup> | 6.31 × 10 <sup>-3</sup>            |
| 1.00 × 10 <sup>-4</sup> | 2.94 × 10 <sup>-3</sup> | 9.28 × 10 <sup>-3</sup>            |
| 1.00 × 10 <sup>-4</sup> | 3.91 × 10 <sup>-3</sup> | 1.15 × 10 <sup>-2</sup>            |

$$k_2 = 2.89 \pm 0.16 \text{ M}^{-1} \text{ s}^{-1}$$

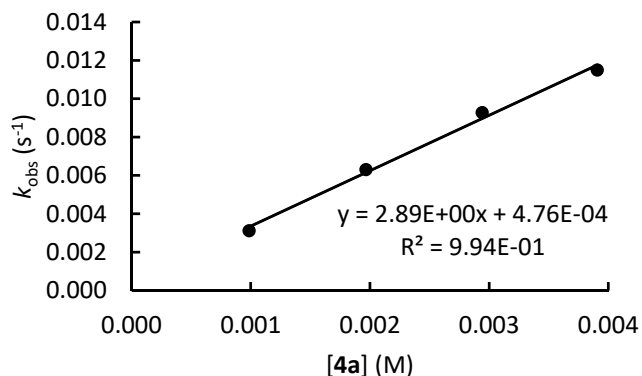

**4a + 6c** (from 6c·HBr + 1 equiv KOTBu) in DMSO (sequential mixing stopped-flow, detection at 425 nm)

RM500

| [6c] <sub>0</sub> , M   | [4a] <sub>0</sub> , M   | k <sub>obs</sub> , s <sup>-1</sup> |
|-------------------------|-------------------------|------------------------------------|
| 1.00 × 10 <sup>-4</sup> | 2.00 × 10 <sup>-3</sup> | 1.68 × 10 <sup>-1</sup>            |
| 1.00 × 10 <sup>-4</sup> | 3.00 × 10 <sup>-3</sup> | 2.57 × 10 <sup>-1</sup>            |
| 1.00 × 10 <sup>-4</sup> | 4.00 × 10 <sup>-3</sup> | 3.37 × 10 <sup>-1</sup>            |
| 1.00 × 10 <sup>-4</sup> | 5.00 × 10 <sup>-3</sup> | 4.11 × 10 <sup>-1</sup>            |

$$k_2 = (8.09 \pm 0.02) \times 10^1 \text{ M}^{-1} \text{ s}^{-1}$$

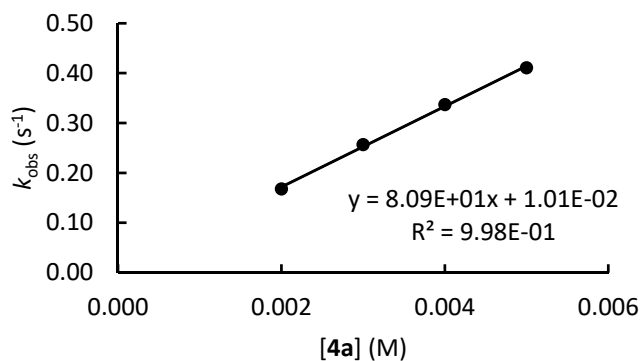

## Reactions of methylene furanone (**4b**) with reference nucleophiles

**4b** + **6a** (from **6a**·HCl with 1 equiv KOtBu) in DMSO (conventional UV/Vis, detection at 427 nm) RM490

| [ <b>6a</b> ] <sub>0</sub> , M | [ <b>4b</b> ] <sub>0</sub> , M | <i>k</i> <sub>obs</sub> , s <sup>-1</sup> |
|--------------------------------|--------------------------------|-------------------------------------------|
| 1.00 × 10 <sup>-4</sup>        | 9.79 × 10 <sup>-4</sup>        | 5.93 × 10 <sup>-3</sup>                   |
| 1.00 × 10 <sup>-4</sup>        | 1.96 × 10 <sup>-3</sup>        | 1.08 × 10 <sup>-2</sup>                   |
| 1.00 × 10 <sup>-4</sup>        | 2.93 × 10 <sup>-3</sup>        | 1.72 × 10 <sup>-2</sup>                   |
| 1.00 × 10 <sup>-4</sup>        | 3.91 × 10 <sup>-3</sup>        | 2.16 × 10 <sup>-2</sup>                   |

$$k_2 = 5.47 \pm 0.27 \text{ M}^{-1} \text{ s}^{-1}$$

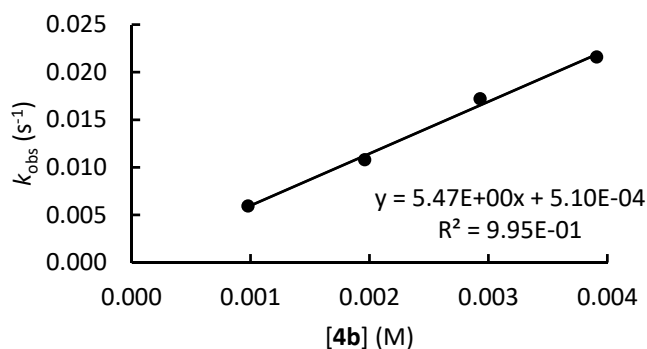

**4b** + **7** (from **7**-HBF<sub>4</sub> + 1 equiv KOtBu) in DMSO (sequential mixing stopped-flow, detection at 378 nm) RM487

RM487

| [ <b>7</b> ] <sub>0</sub> , M | [ <b>4b</b> ] <sub>0</sub> , M | <i>k</i> <sub>obs</sub> , s <sup>-1</sup> |                         |                         |                         |
|-------------------------------|--------------------------------|-------------------------------------------|-------------------------|-------------------------|-------------------------|
|                               |                                | 1                                         | 2                       | 3                       | average                 |
| 1.00 × 10 <sup>-4</sup>       | 3.00 × 10 <sup>-3</sup>        | 3.24 × 10 <sup>-2</sup>                   | 3.50 × 10 <sup>-2</sup> | 4.00 × 10 <sup>-2</sup> | 3.58 × 10 <sup>-2</sup> |
| 1.00 × 10 <sup>-4</sup>       | 5.00 × 10 <sup>-3</sup>        | 4.65 × 10 <sup>-2</sup>                   | 5.02 × 10 <sup>-2</sup> | 5.78 × 10 <sup>-2</sup> | 5.15 × 10 <sup>-2</sup> |
| 1.00 × 10 <sup>-4</sup>       | 7.00 × 10 <sup>-3</sup>        | 6.15 × 10 <sup>-2</sup>                   | 6.42 × 10 <sup>-2</sup> | 7.25 × 10 <sup>-2</sup> | 6.61 × 10 <sup>-2</sup> |
| 1.00 × 10 <sup>-4</sup>       | 1.00 × 10 <sup>-2</sup>        | 9.82 × 10 <sup>-2</sup>                   | 9.15 × 10 <sup>-2</sup> | 9.46 × 10 <sup>-2</sup> | 9.48 × 10 <sup>-2</sup> |

$$k_2 = 8.39 \pm 0.38 \text{ M}^{-1} \text{ s}^{-1}$$

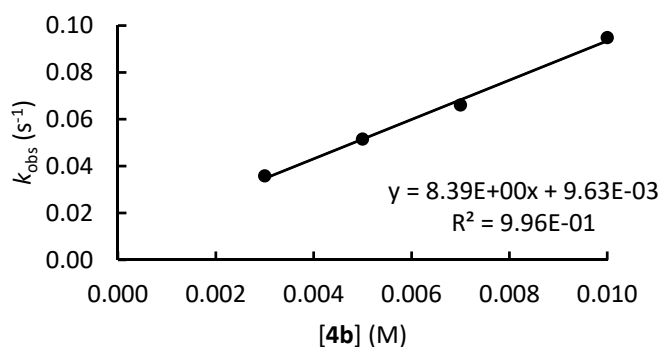

**4b + 6c** (from **6c**·HBr + 1 equiv KOTBu) in DMSO (sequential mixing stopped-flow, detection at 425 nm)

RM501

| [6c] <sub>0</sub> , M   | [4b] <sub>0</sub> , M   | <i>k</i> <sub>obs</sub> , s <sup>-1</sup> |      |      |      |         |
|-------------------------|-------------------------|-------------------------------------------|------|------|------|---------|
|                         |                         | 1                                         | 2    | 3    | 4    | average |
| 1.00 × 10 <sup>-4</sup> | 2.00 × 10 <sup>-3</sup> | 1.16                                      | 1.16 | 1.18 | 1.19 | 1.17    |
| 1.00 × 10 <sup>-4</sup> | 3.00 × 10 <sup>-3</sup> | 1.79                                      | 1.82 | 1.82 | 1.75 | 1.80    |
| 1.00 × 10 <sup>-4</sup> | 4.00 × 10 <sup>-3</sup> | 2.36                                      | 2.33 | 2.29 | 2.32 | 2.33    |
| 1.00 × 10 <sup>-4</sup> | 5.00 × 10 <sup>-3</sup> | 2.99                                      | 3.10 | 3.03 | 2.97 | 3.02    |
| 1.00 × 10 <sup>-4</sup> | 6.00 × 10 <sup>-3</sup> | 3.74                                      | 3.46 | 3.60 | 3.56 | 3.59    |

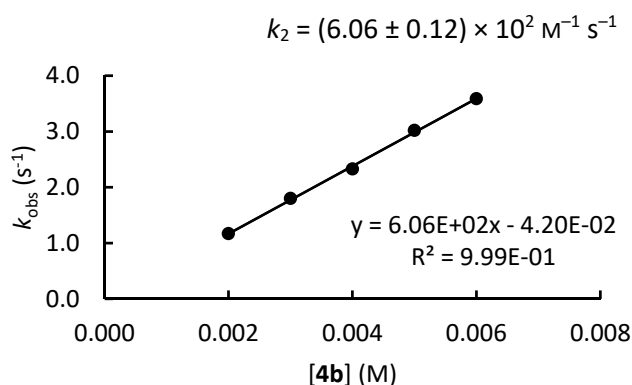

### Reactions of pyranone (5a) with reference nucleophiles

**5a + 6a** (from **6a**·H + 1 equiv KOTBu) in DMSO (conventional UV/Vis, detection at 427 nm) RM492

| [6a] <sub>0</sub> , M   | [5a] <sub>0</sub> , M   | <i>k</i> <sub>obs</sub> , s <sup>-1</sup> |
|-------------------------|-------------------------|-------------------------------------------|
| 1.00 × 10 <sup>-4</sup> | 3.93 × 10 <sup>-3</sup> | 4.35 × 10 <sup>-4</sup>                   |
| 1.00 × 10 <sup>-4</sup> | 5.87 × 10 <sup>-3</sup> | 6.38 × 10 <sup>-4</sup>                   |
| 1.00 × 10 <sup>-4</sup> | 7.35 × 10 <sup>-3</sup> | 7.59 × 10 <sup>-4</sup>                   |
| 1.00 × 10 <sup>-4</sup> | 7.78 × 10 <sup>-3</sup> | 8.02 × 10 <sup>-4</sup>                   |
| 1.00 × 10 <sup>-4</sup> | 9.38 × 10 <sup>-3</sup> | 9.72 × 10 <sup>-4</sup>                   |

$$k_2 = (9.68 \pm 0.27) \times 10^{-2} \text{ M}^{-1} \text{ s}^{-1}$$

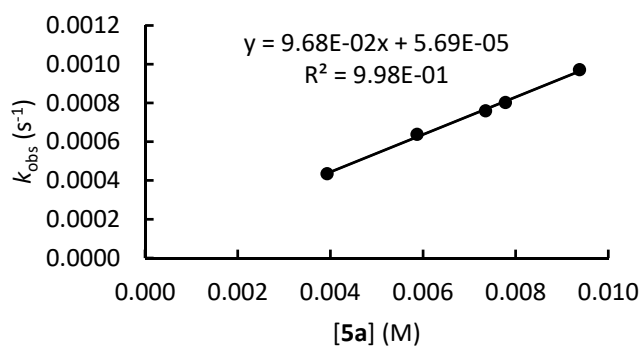

**5a + 7** (from **7**·HBF<sub>4</sub> + 1 equiv KOTBu) in DMSO (conventional UV/Vis, detection at 378 nm) RM498

| [7] <sub>0</sub> , M    | [5a] <sub>0</sub> , M   | <i>k</i> <sub>obs</sub> , s <sup>-1</sup> |
|-------------------------|-------------------------|-------------------------------------------|
| 1.00 × 10 <sup>-4</sup> | 5.85 × 10 <sup>-3</sup> | 2.68 × 10 <sup>-3</sup>                   |
| 1.00 × 10 <sup>-4</sup> | 7.76 × 10 <sup>-3</sup> | 3.44 × 10 <sup>-3</sup>                   |
| 1.00 × 10 <sup>-4</sup> | 9.65 × 10 <sup>-3</sup> | 4.28 × 10 <sup>-3</sup>                   |
| 1.00 × 10 <sup>-4</sup> | 1.16 × 10 <sup>-2</sup> | 5.03 × 10 <sup>-3</sup>                   |

$$k_2 = (4.12 \pm 0.08) \times 10^{-1} \text{ M}^{-1} \text{ s}^{-1}$$

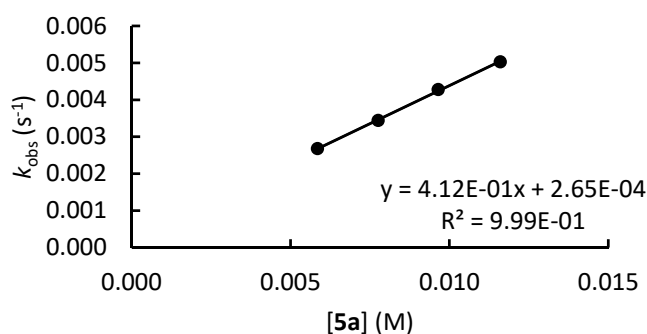



### Reactions of methylene pyranone (5b) with reference nucleophiles

**5b + 6a** (from **6a**·HCl + 1 equiv KOTu) in DMSO (conventional UV/Vis, detection at 427 nm) RM890

| [6a] <sub>0</sub> , M   | [5b] <sub>0</sub> , M   | k <sub>obs</sub> , s <sup>-1</sup> |
|-------------------------|-------------------------|------------------------------------|
| 1.00 × 10 <sup>-4</sup> | 9.78 × 10 <sup>-4</sup> | 7.93 × 10 <sup>-3</sup>            |
| 1.00 × 10 <sup>-4</sup> | 1.95 × 10 <sup>-3</sup> | 1.46 × 10 <sup>-2</sup>            |
| 1.00 × 10 <sup>-4</sup> | 2.93 × 10 <sup>-3</sup> | 2.16 × 10 <sup>-2</sup>            |
| 1.00 × 10 <sup>-4</sup> | 3.90 × 10 <sup>-3</sup> | 2.71 × 10 <sup>-2</sup>            |

$$k_2 = 6.62 \pm 0.23 \text{ M}^{-1} \text{ s}^{-1}$$

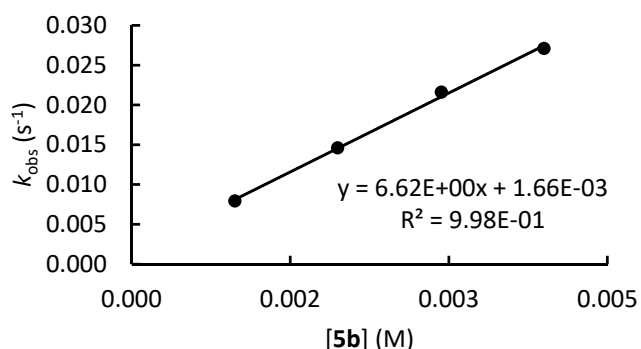

**5b + 7** (from **7**·HBF<sub>4</sub> + 1 equiv KOTu) in DMSO (conventional UV/Vis, detection at 378 nm) RM891

| [7] <sub>0</sub> , M    | [5b] <sub>0</sub> , M   | k <sub>obs</sub> , s <sup>-1</sup> |
|-------------------------|-------------------------|------------------------------------|
| 1.00 × 10 <sup>-4</sup> | 9.68 × 10 <sup>-4</sup> | 6.03 × 10 <sup>-3</sup>            |
| 1.00 × 10 <sup>-4</sup> | 1.93 × 10 <sup>-3</sup> | 1.10 × 10 <sup>-2</sup>            |
| 1.00 × 10 <sup>-4</sup> | 2.90 × 10 <sup>-3</sup> | 1.60 × 10 <sup>-2</sup>            |
| 1.00 × 10 <sup>-4</sup> | 3.85 × 10 <sup>-3</sup> | 2.07 × 10 <sup>-2</sup>            |

$$k_2 = 5.10 \pm 0.04 \text{ M}^{-1} \text{ s}^{-1}$$

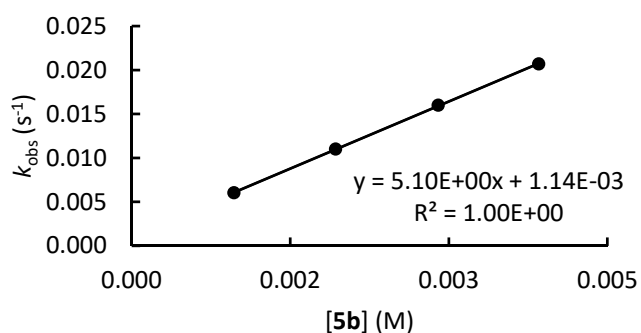

**5b + 6c** (from **6c**·HBr + 1 equiv KOTu) in DMSO (sequential mixing stopped-flow, detection at 425 nm)

RM896

| [6c] <sub>0</sub> , M   | [5b] <sub>0</sub> , M   | k <sub>obs</sub> , s <sup>-1</sup> |      |      | average |
|-------------------------|-------------------------|------------------------------------|------|------|---------|
|                         |                         | 1                                  | 2    | 3    |         |
| 1.00 × 10 <sup>-4</sup> | 2.00 × 10 <sup>-3</sup> | 1.06                               | 1.05 | 1.05 | 1.05    |
| 1.00 × 10 <sup>-4</sup> | 3.00 × 10 <sup>-3</sup> | 1.67                               | 1.72 | 1.71 | 1.70    |
| 1.00 × 10 <sup>-4</sup> | 4.00 × 10 <sup>-3</sup> | 2.29                               | 2.28 | 2.25 | 2.27    |
| 1.00 × 10 <sup>-4</sup> | 5.00 × 10 <sup>-3</sup> | 2.97                               | 2.92 | 2.90 | 2.93    |
| 1.00 × 10 <sup>-4</sup> | 6.00 × 10 <sup>-3</sup> | 3.46                               | 3.44 | 3.41 | 3.44    |

$$k_2 = (6.01 \pm 0.14) \times 10^2 \text{ M}^{-1} \text{ s}^{-1}$$

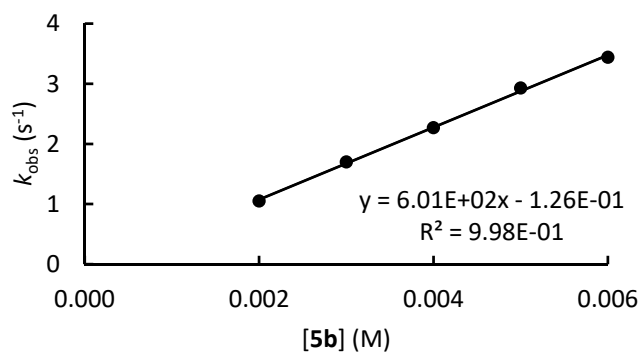

### Reactions of carvone (19) with reference nucleophiles

19 + 6c (from 6c·HBr + 1 equiv KOTBu) in DMSO (conventional UV/Vis, detection at 425 nm) RM1055

| [6c] <sub>0</sub> , M   | [19] <sub>0</sub> , M   | k <sub>obs</sub> , s <sup>-1</sup> |
|-------------------------|-------------------------|------------------------------------|
| 1.00 × 10 <sup>-4</sup> | 5.79 × 10 <sup>-3</sup> | 4.31 × 10 <sup>-3</sup>            |
| 1.00 × 10 <sup>-4</sup> | 7.71 × 10 <sup>-3</sup> | 5.38 × 10 <sup>-3</sup>            |
| 1.00 × 10 <sup>-4</sup> | 9.62 × 10 <sup>-3</sup> | 6.46 × 10 <sup>-3</sup>            |
| 1.00 × 10 <sup>-4</sup> | 1.15 × 10 <sup>-2</sup> | 7.45 × 10 <sup>-3</sup>            |

$$k_2 = (5.52 \pm 0.06) \times 10^{-1} \text{ M}^{-1} \text{ s}^{-1}$$

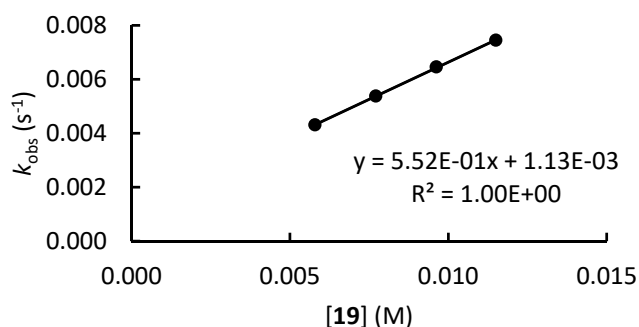

### Reactions of verbenone (20) with reference nucleophiles

20 + 6c (from 6c·HBr + 1 equiv KOTBu) in DMSO (conventional UV/Vis, detection at 425 nm) RM1057

| [6c] <sub>0</sub> , M   | [20] <sub>0</sub> , M   | k <sub>obs</sub> , s <sup>-1</sup> |
|-------------------------|-------------------------|------------------------------------|
| 1.00 × 10 <sup>-4</sup> | 9.59 × 10 <sup>-3</sup> | 1.28 × 10 <sup>-3</sup>            |
| 1.00 × 10 <sup>-4</sup> | 1.34 × 10 <sup>-2</sup> | 1.45 × 10 <sup>-3</sup>            |
| 1.00 × 10 <sup>-4</sup> | 1.72 × 10 <sup>-2</sup> | 1.95 × 10 <sup>-3</sup>            |
| 1.00 × 10 <sup>-4</sup> | 2.10 × 10 <sup>-2</sup> | 2.17 × 10 <sup>-3</sup>            |

$$k_2 = (8.33 \pm 1.16) \times 10^{-2} \text{ M}^{-1} \text{ s}^{-1}$$

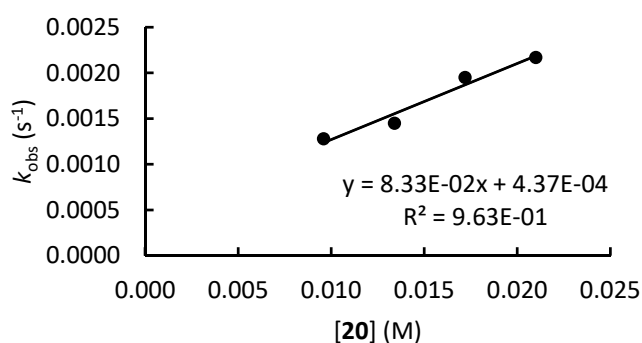

### Reactions of nootkatone (21) with reference nucleophiles

21 + 6c (from 6c·HBr + 1 equiv KOTBu) in DMSO (conventional UV/Vis, detection at 425 nm) RM1061

| [6c] <sub>0</sub> , M   | [21] <sub>0</sub> , M   | k <sub>obs</sub> , s <sup>-1</sup> |
|-------------------------|-------------------------|------------------------------------|
| 1.00 × 10 <sup>-4</sup> | 9.61 × 10 <sup>-3</sup> | 4.85 × 10 <sup>-4</sup>            |
| 1.00 × 10 <sup>-4</sup> | 1.34 × 10 <sup>-2</sup> | 5.82 × 10 <sup>-4</sup>            |
| 1.00 × 10 <sup>-4</sup> | 1.70 × 10 <sup>-2</sup> | 6.83 × 10 <sup>-4</sup>            |
| 1.00 × 10 <sup>-4</sup> | 2.07 × 10 <sup>-2</sup> | 7.89 × 10 <sup>-4</sup>            |

$$k_2 = (2.75 \pm 0.05) \times 10^{-2} \text{ M}^{-1} \text{ s}^{-1}$$

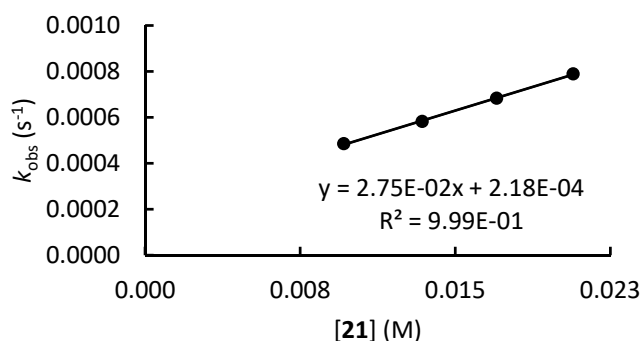

### Reactions of parthenolide (**22**) with reference nucleophiles

**22** + **6c** (from **6c**·HBr + 1 equiv KOtBu) in DMSO (sequential mixing stopped-flow, detection at 425 nm)

RM1052

| [ <b>6c</b> ] <sub>0</sub> , M | [ <b>22</b> ] <sub>0</sub> , M | <i>k</i> <sub>obs</sub> , s <sup>-1</sup> |      |      |      |      | <i>average</i> |
|--------------------------------|--------------------------------|-------------------------------------------|------|------|------|------|----------------|
|                                |                                | 1                                         | 2    | 3    | 4    | 5    |                |
| 1.00 × 10 <sup>-4</sup>        | 2.00 × 10 <sup>-3</sup>        | 1.40                                      | 1.38 | 1.39 | 1.37 | 1.38 | 1.38           |
| 1.00 × 10 <sup>-4</sup>        | 3.00 × 10 <sup>-3</sup>        | 2.20                                      | 2.18 | 2.16 | 2.18 | 2.14 | 2.17           |
| 1.00 × 10 <sup>-4</sup>        | 4.00 × 10 <sup>-3</sup>        | 2.82                                      | 2.80 | 2.75 | 2.77 | 2.81 | 2.79           |
| 1.00 × 10 <sup>-4</sup>        | 5.00 × 10 <sup>-3</sup>        | 3.58                                      | 3.59 | 3.62 | 3.55 | 3.62 | 3.59           |

$$k_2 = (7.25 \pm 0.25) \times 10^2 \text{ M}^{-1} \text{ s}^{-1}$$

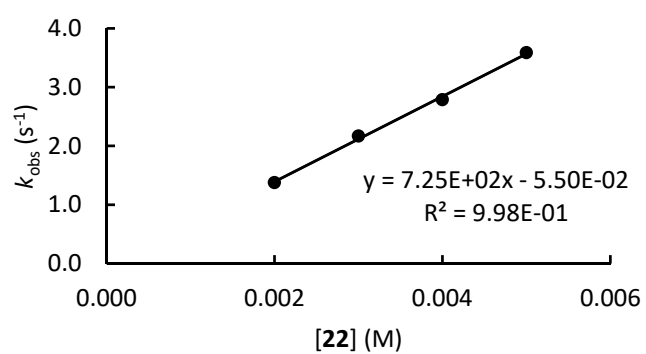

## Competition Experiments

Competition experiments were performed as outlined in the main text. Reaction mixtures in  $d_6$ -DMSO were analyzed without further workup.  $^1\text{H}$  NMR spectra were recorded at 400 MHz with a pulse delay of 20 seconds and subsequently processed with phase and baseline correction (MestReNova version 12.0.4).

To identify the significant resonances in the reaction mixtures of the competition experiments, we also analyzed the solutions of the reactions of the sulfonium ylide **7** with the individual electrophiles in  $d_6$ -DMSO. The comparison of the  $^1\text{H}$  NMR spectra obtained for the different species under identical conditions facilitated the assignment of the resonances to be used for the determination of the competition constants.

As a consequence, well-resolved resonances of the diastereomeric products were selected, integrated, and utilized for the determination of the competition constants  $\kappa$ . The spectral ranges and integrals used for the spectroscopic analysis are marked in each of the  $^1\text{H}$  NMR spectra.

Competition experiment between **4b** and parthenolide (**22**)  
(RNH513)

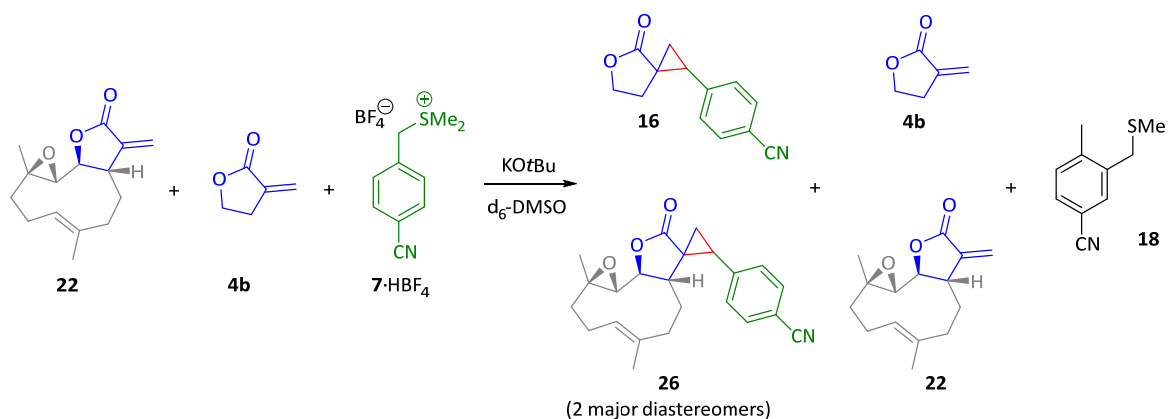

In a glovebox, parthenolide **22** (4.20 mg, 0.0169 mmol),  $\alpha$ -methylenefuranone **4b** (1.66 mg, 0.0169 mmol) and the sulfonium tetrafluoroborate **7**-HBF<sub>4</sub> (3.73 mg, 0.0141 mmol) were dissolved in d<sub>6</sub>-DMSO (0.4 mL) and then mixed with a solution of KOtBu (1.5 mg, 0.013 mmol) in d<sub>6</sub>-DMSO (0.4 mL).

The resulting reaction mixture was transferred into an NMR tube and analyzed by <sup>1</sup>H NMR spectroscopy.

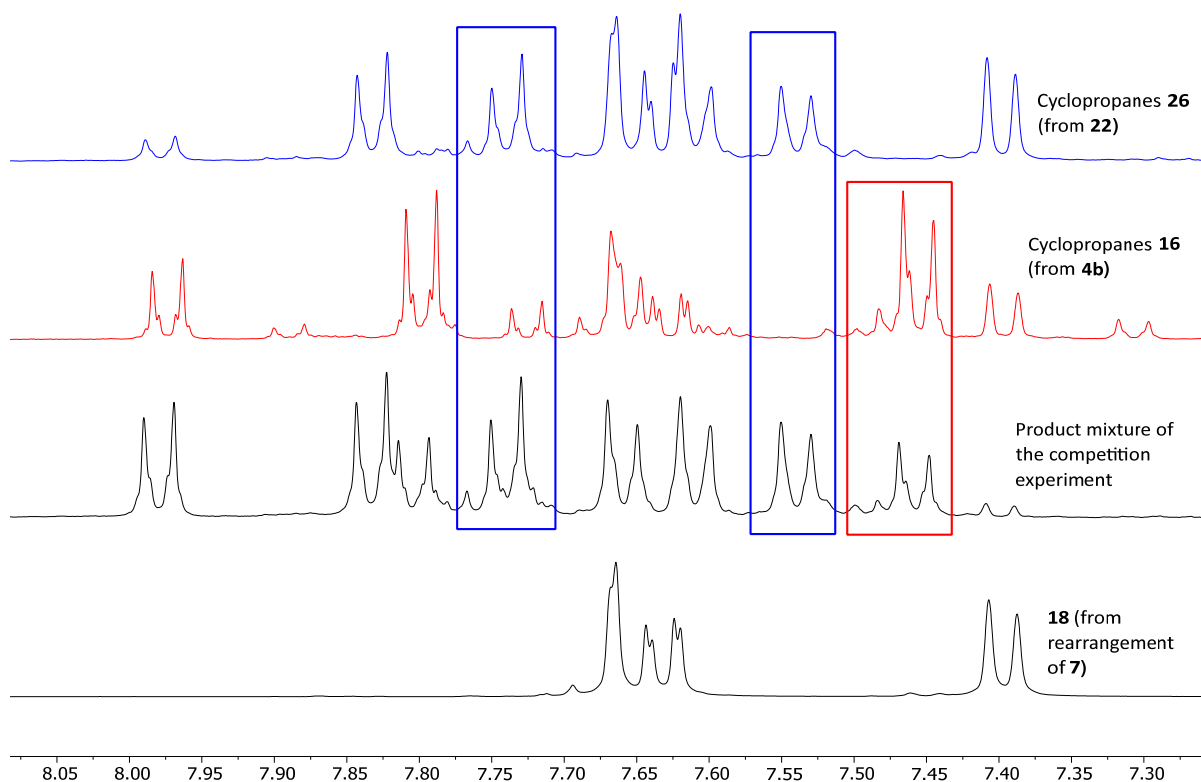

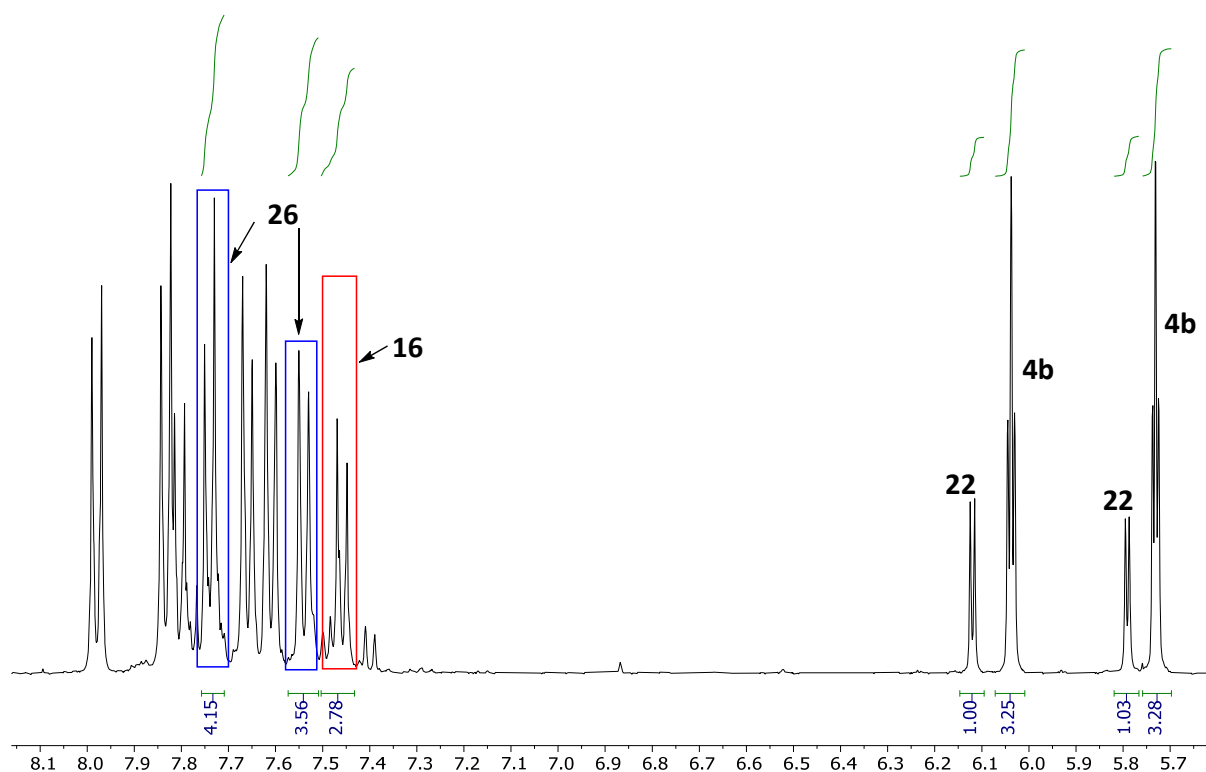

Well resolved resonances in the aromatic region of the <sup>1</sup>H NMR spectrum were selected for integration. Integrals over resonances assigned to both major diastereomers of **16** as well as those assigned to the two major diastereomers of **26** were used to determine the competition constant  $\kappa$ .

| Species   | Integrals / number of protons | Integral, normalized to 1 H |
|-----------|-------------------------------|-----------------------------|
| <b>22</b> | 1.00 / 1 H                    | 1.00 / 1 H                  |
| <b>4b</b> | 3.25 / 1 H                    | 3.25 / 1 H                  |
| <b>26</b> | two diastereomers: 7.71 / 2 H | 3.86 / 1 H                  |
| <b>16</b> | two diastereomers: 2.78 / 2 H | 1.39 / 1 H                  |

$$\kappa = \frac{\lg\left(1 + \frac{[\mathbf{26}]}{[\mathbf{22}]}\right)}{\lg\left(1 + \frac{[\mathbf{16}]}{[\mathbf{4b}]}\right)} = \frac{\lg\left(1 + \frac{3.86}{1.00}\right)}{\lg\left(1 + \frac{1.39}{3.25}\right)} = 4.4$$

Competition experiment between **4b** and costunolid (**23**)  
(RNH447)

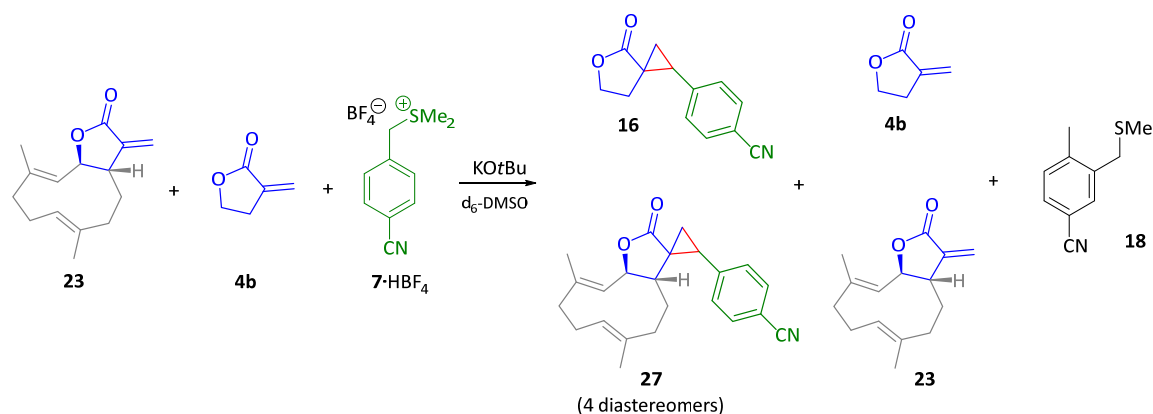

In a glovebox, costunolid (**23**, 4.26 mg, 0.0183 mmol),  $\alpha$ -methylenefuranone (**4b**, 1.80 mg, 0.0183 mmol) and the sulfonium tetrafluoroborate **7·HBF<sub>4</sub>** (4.04 mg, 0.0152 mmol) were dissolved in **d<sub>6</sub>-DMSO** (0.4 mL) and then mixed with a solution of **KOtBu** (1.6 mg, 0.014 mmol) in **d<sub>6</sub>-DMSO** (0.4 mL).

The resulting reaction mixture was transferred into an NMR tube and analyzed by <sup>1</sup>H NMR spectroscopy.

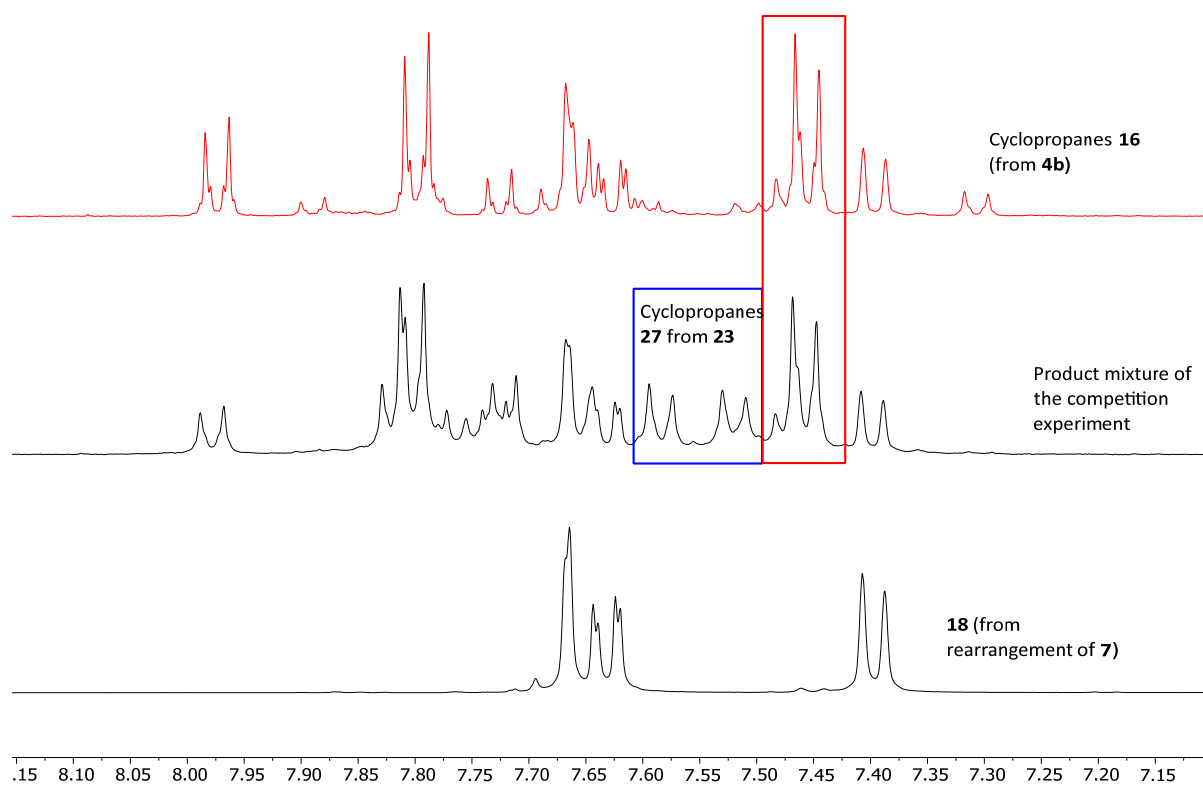

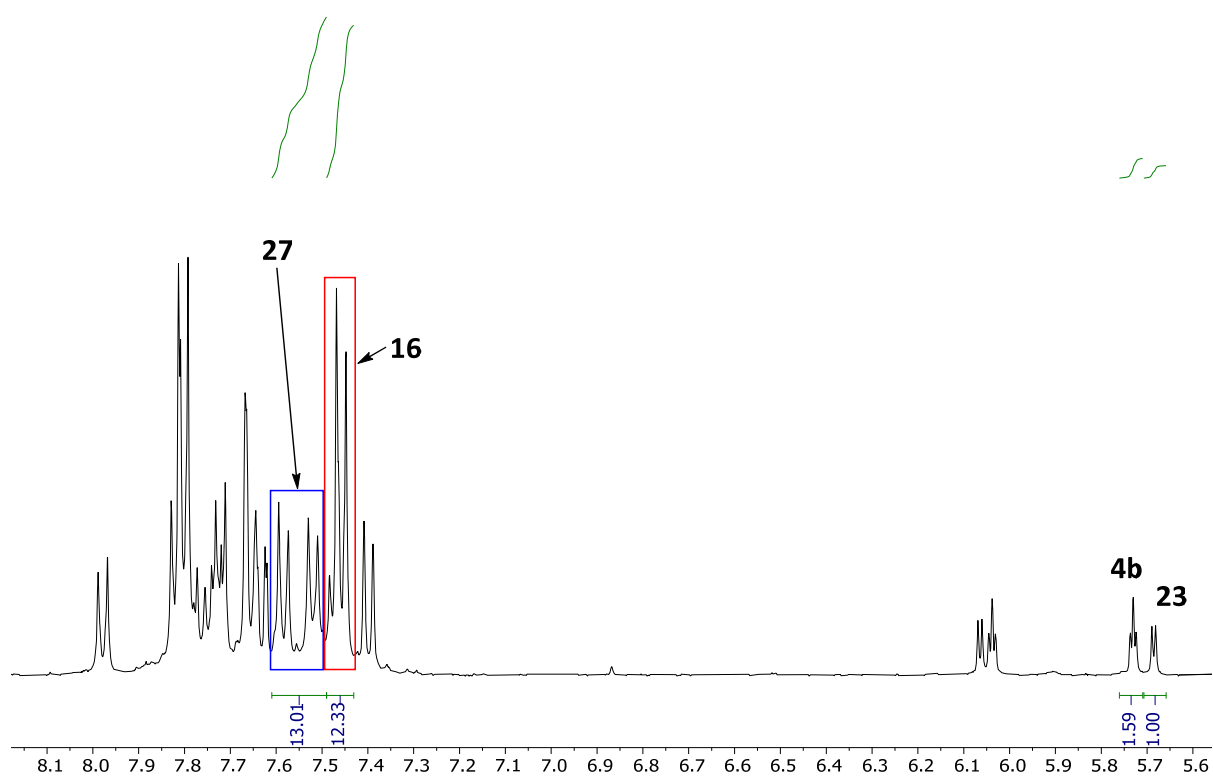

Well resolved resonances in the aromatic region of the  $^1\text{H}$  NMR spectrum were selected for integration. Integrals over resonances assigned to both major diastereomers of **16** and **27**, respectively, were used to determine the competition constant  $\kappa$ .

| Species   | Integrals / number of protons  | Integral, normalized to 1 H |
|-----------|--------------------------------|-----------------------------|
| <b>23</b> | 1.00 / 1 H                     | 1.00 / 1 H                  |
| <b>4b</b> | 1.59 / 1 H                     | 1.59 / 1 H                  |
| <b>27</b> | two diastereomers: 13.01 / 2 H | 6.51 / 1 H                  |
| <b>16</b> | two diastereomers: 12.33 / 2 H | 6.17 / 1 H                  |

$$\kappa = \frac{\lg\left(1 + \frac{[\mathbf{27}]}{[\mathbf{23}]}\right)}{\lg\left(1 + \frac{[\mathbf{16}]}{[\mathbf{4b}]}\right)} = \frac{\lg\left(1 + \frac{6.51}{1.00}\right)}{\lg\left(1 + \frac{6.17}{1.59}\right)} = 1.3$$



Competition experiment between **4b** and dehydroleucodine (**24**)  
(RNH448)

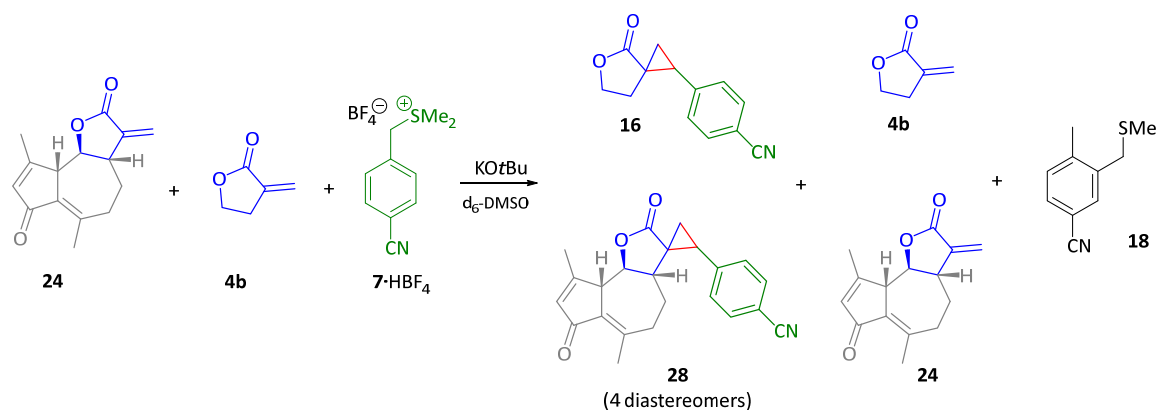

In a glovebox, dehydroleucodine (**24**, 4.48 mg, 0.0183 mmol),  $\alpha$ -methylene-furanone (**4b**, 1.85 mg, 0.0188 mmol) and the sulfonium tetrafluoroborate **7-HBF<sub>4</sub>** (4.03 mg, 0.0152 mmol) were dissolved in  $\text{d}_6\text{-DMSO}$  (0.4 mL) and then mixed with a solution of  $\text{KOtBu}$  (1.6 mg, 0.014 mmol) in  $\text{d}_6\text{-DMSO}$  (0.4 mL).

The resulting reaction mixture was transferred into an NMR tube and analyzed by  $^1\text{H}$  NMR spectroscopy.

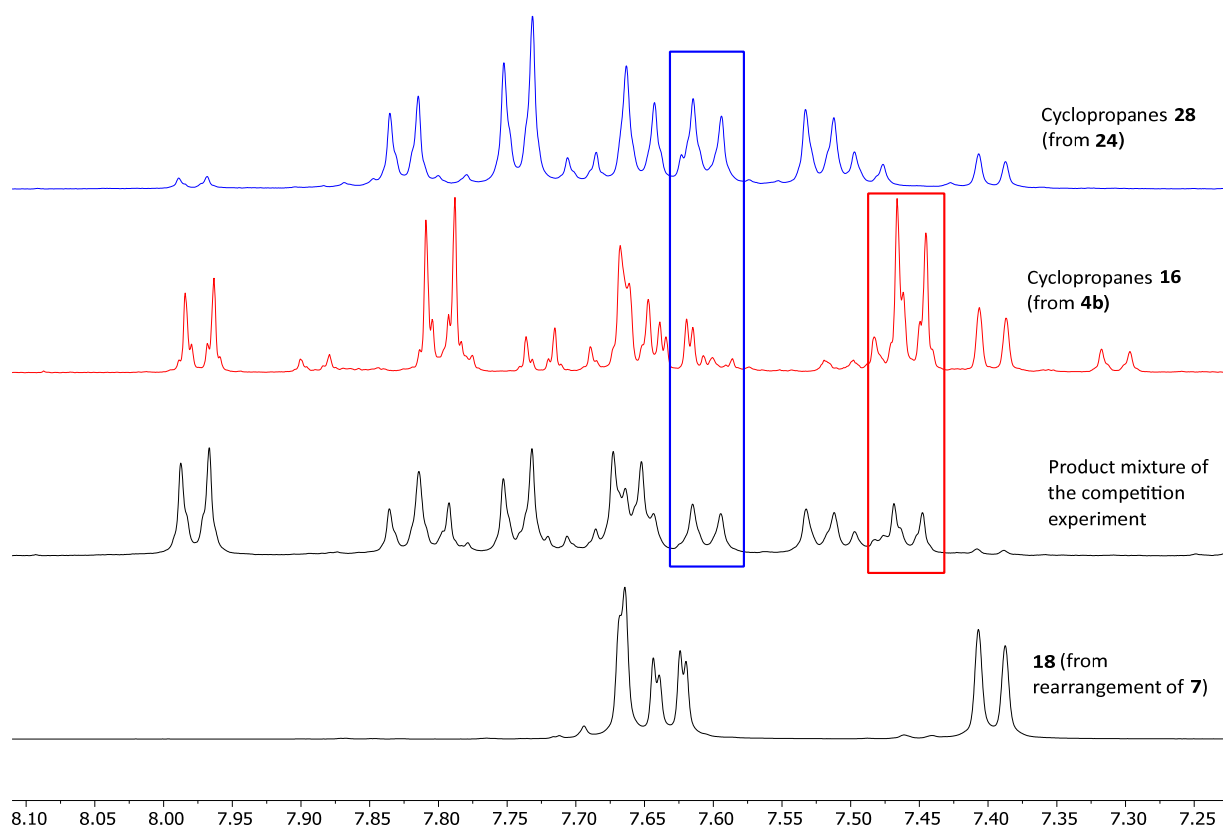

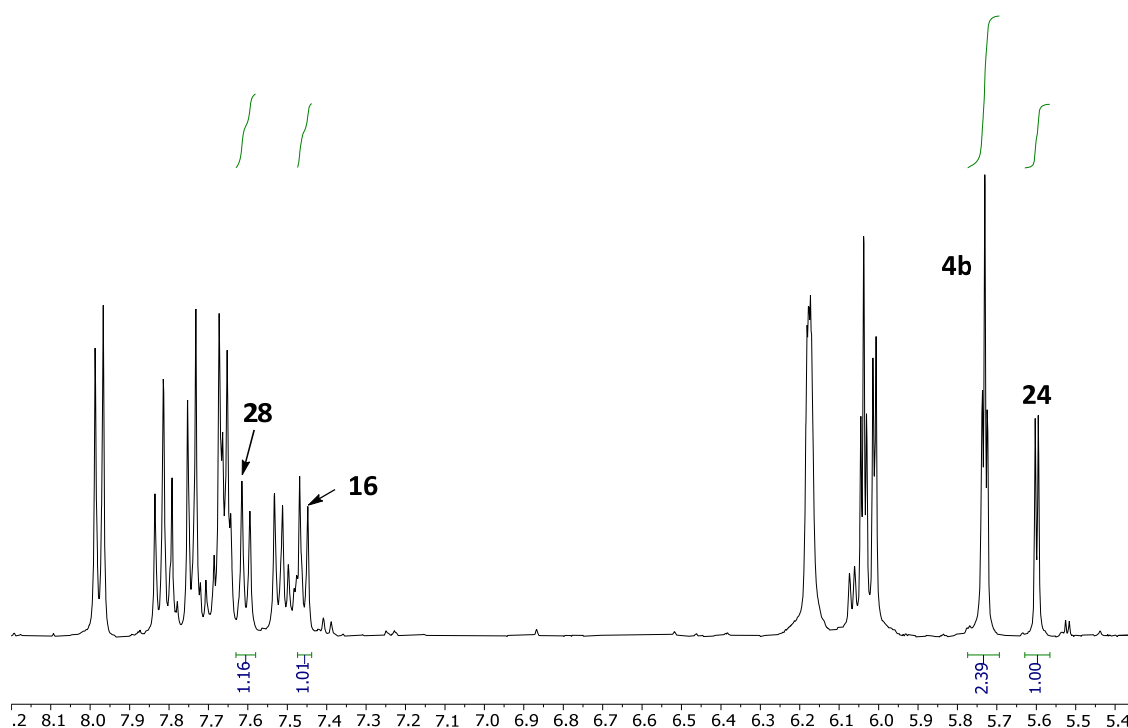

Well resolved resonances in the aromatic region of the  $^1\text{H}$  NMR spectrum were selected for integration. Integrals over resonances assigned to one diastereomer of **16** and **28**, respectively, were used for the evaluation. Both integrals were corrected for the diastereomeric ratios for **16** and **28** (independently determined under identical conditions) to determine the competition constant  $\kappa$ .

| Species   | Integrals / number of protons                                                                                 | Integral, normalized to 1 H |
|-----------|---------------------------------------------------------------------------------------------------------------|-----------------------------|
| <b>24</b> | 1.00 / 1 H                                                                                                    | 1.00 / 1 H                  |
| <b>4b</b> | 2.39 / 1 H                                                                                                    | 2.39 / 1 H                  |
| <b>28</b> | Single diastereomer: 1.16 / 2 H<br>Corrected for a diastereomeric ratio of (dr: 0.294 : 1) to give 3.94 / 2 H | 1.97 / 1 H                  |
| <b>16</b> | Single diastereomer: 1.01 / 2 H<br>Corrected for a diastereomeric ratio of (dr: 0.810 : 1) to give 1.25 / 2 H | 0.63 / 1 H                  |

$$\kappa = \frac{\lg\left(1 + \frac{[\mathbf{28}]}{[\mathbf{24}]}\right)}{\lg\left(1 + \frac{[\mathbf{16}]}{[\mathbf{4b}]}\right)} = \frac{\lg\left(1 + \frac{1.97}{1.00}\right)}{\lg\left(1 + \frac{0.63}{2.39}\right)} = 4.6$$

Competition experiment between **4b** and dehydrocostus lactone (**25**)  
(RNH380)

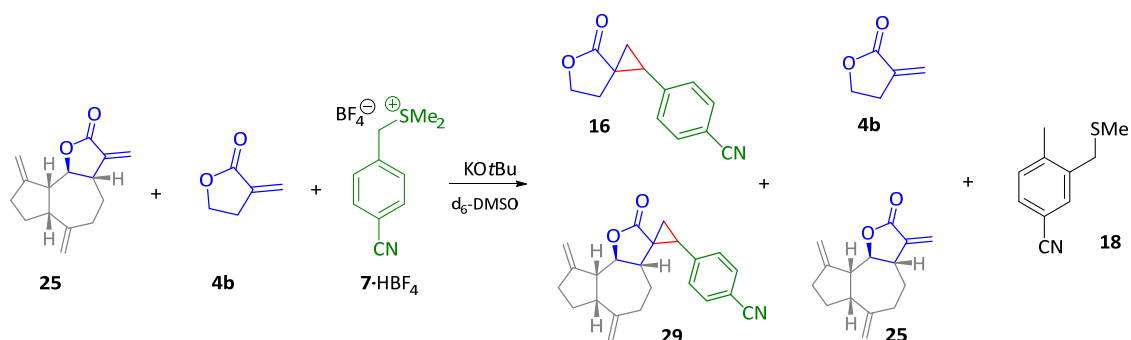

In a glovebox, dehydrocostus lactone (**25**, 4.0 mg, 0.0174 mmol),  $\alpha$ -methylene-furanone (**4b**, 1.7 mg, 0.0173 mmol) and the sulfonium tetrafluoroborate **7**·HBF<sub>4</sub> (3.8 mg, 0.0145 mmol) were dissolved in d<sub>6</sub>-DMSO (0.4 mL) and then mixed with a solution of KOtBu (1.5 mg, 0.013 mmol) in d<sub>6</sub>-DMSO (0.4 mL).

The resulting reaction mixture was transferred into an NMR tube and analyzed by <sup>1</sup>H NMR spectroscopy.

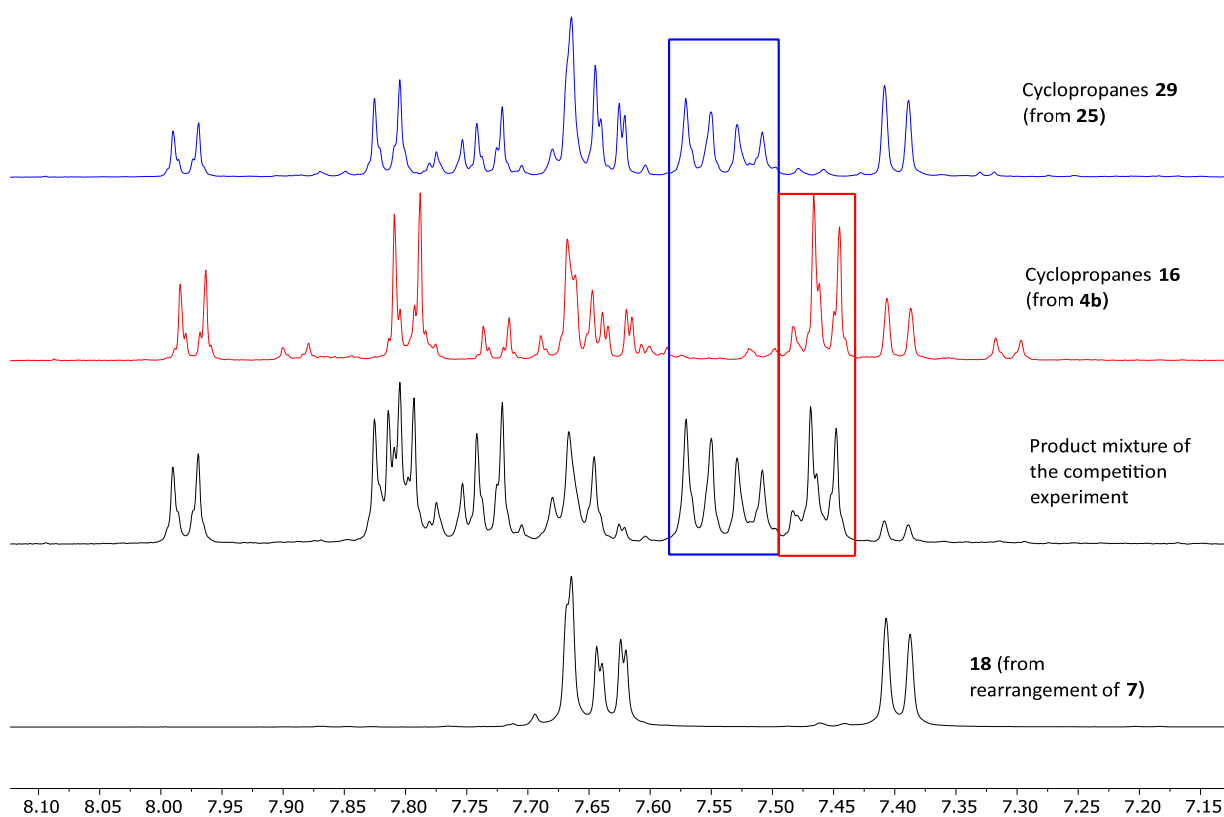

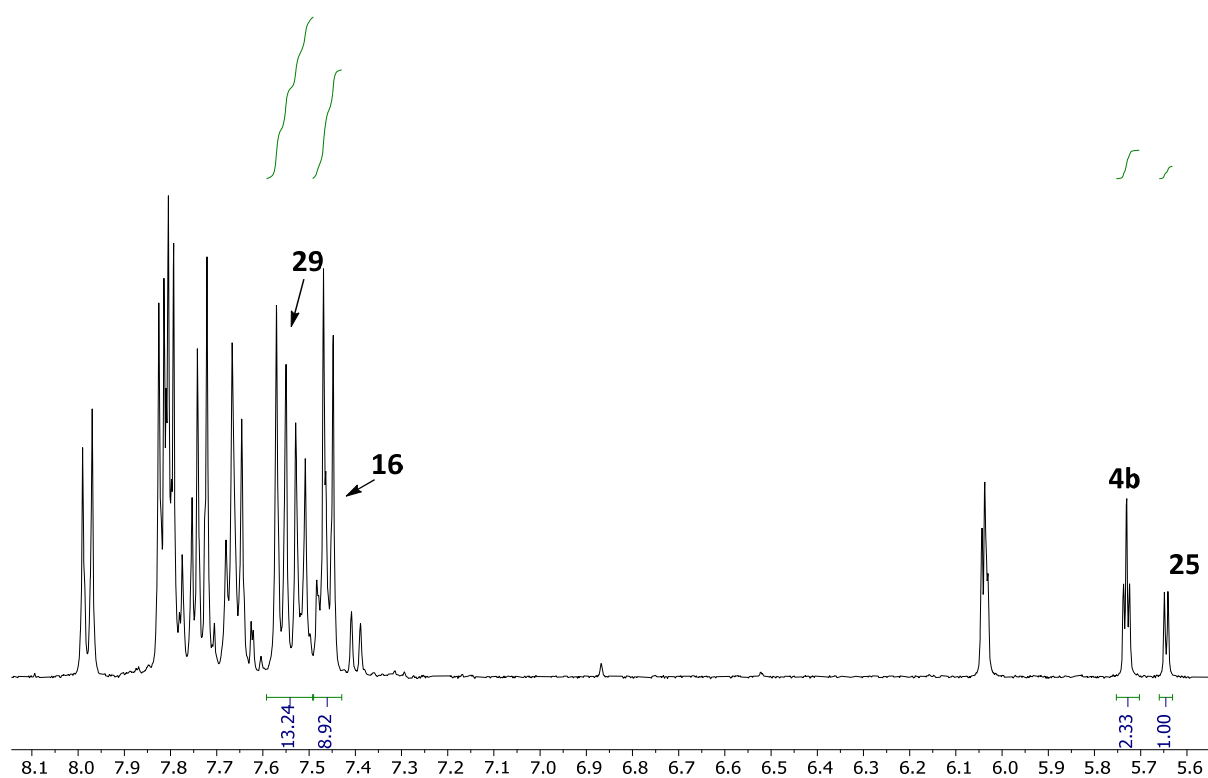

Well resolved resonances in the aromatic region of the <sup>1</sup>H NMR spectrum were selected for integration. Integrals over resonances assigned to both major diastereomers of **16** and **29**, respectively, were used to determine the competition constant  $\kappa$ .

| Species   | Integrals / number of protons  | Integral, normalized to 1 H |
|-----------|--------------------------------|-----------------------------|
| <b>25</b> | 1.00 / 1 H                     | 1.00 / 1 H                  |
| <b>4b</b> | 2.33 / 1 H                     | 2.33 / 1 H                  |
| <b>29</b> | two diastereomers: 13.24 / 2 H | 6.62 / 1 H                  |
| <b>16</b> | two diastereomers: 8.92 / 2 H  | 4.46 / 1 H                  |

$$\kappa = \frac{\lg\left(1 + \frac{[\mathbf{29}]}{[\mathbf{25}]}\right)}{\lg\left(1 + \frac{[\mathbf{16}]}{[\mathbf{4b}]}\right)} = \frac{\lg\left(1 + \frac{6.62}{1.00}\right)}{\lg\left(1 + \frac{4.46}{2.33}\right)} = 1.9$$

## Kinetic GSH Chemoassay

A kinetic glutathione (GSH) chemoassay was used to determine the reactivity of cyclic Michael acceptors in aqueous solution.<sup>56</sup>

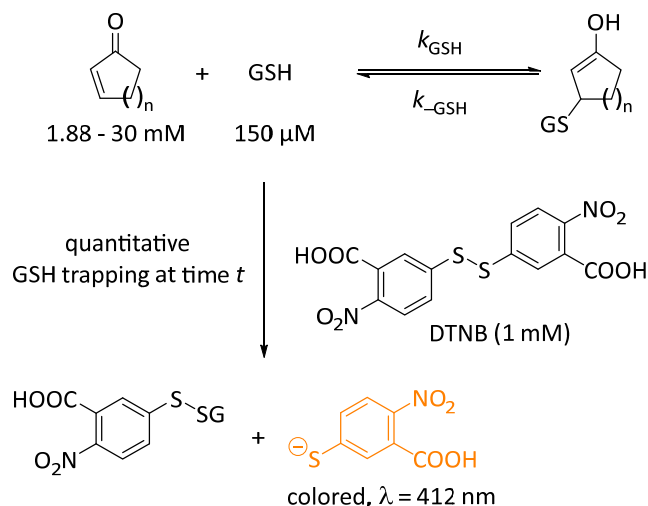

Second-order rate constants ( $k_2$ ) for the reactions of GSH with cyclic enones and  $\alpha,\beta$ -unsaturated lactones (electrophiles) were determined by a series of pseudo-first order kinetic measurements at variable electrophile concentrations. In aqueous solutions, the reactions of GSH with the electrophiles were monitored by following the consumption of GSH. For each kinetic run, 15-20 time-dependent GSH concentrations,  $[\text{GSH}]_t$ , were determined by quantitative trapping with DTNB (indicated by the formation of the colored thiophenolate, detected at  $\lambda = 412$  nm). Assuming the validity of the Lambert-Beer law for the sub-millimolar solutions of the thiophenolate, the measured absorbance  $A$  (at 412 nm) is a measure of  $[\text{GSH}]_t$ .

### General Procedure.

180  $\mu\text{L}$  of GSH solution (10 $\times$  stock solution, pH 7.40; final concentration: 150  $\mu\text{M}$ ) in phosphate buffer (64.8 mM  $\text{Na}_2\text{HPO}_4$ , 15.3 mM  $\text{KH}_2\text{PO}_4$ , pH 7.40) were added to 1620  $\mu\text{L}$  electrophile solution in phosphate buffer and incubated in a 2 mL Eppendorf tube at 20  $^\circ\text{C}$  with shaking at 300 rpm. After certain time intervals, 100  $\mu\text{L}$  of the reaction mixture or control were added to 2  $\mu\text{L}$  of DTNB solution in phosphate buffer (100 $\times$  stock solution, pH 7.40; final concentration: 1 mM) in a transparent flat bottom 96-well plate (*Greiner*). The absorbance ( $\lambda = 412$  nm) was measured at 20  $^\circ\text{C}$  using an Infinite M Nano Plus plate reader (*Tecan*). This procedure was repeated 15 to 20 times to determine a sufficient number of time-dependent GSH concentrations,  $[\text{GSH}]_t$ , during the course of a given reaction. Electrophile solutions were prepared in four different concentrations with equal concentration gaps (1x, 2x, 3x, 4x) and were in the range from 1.88 to 30 mM. As controls, solutions without electrophile were used containing either no GSH (blank; 0% relative absorbance) or 150  $\mu\text{M}$  GSH (control; 100% relative absorbance). All solutions were pre-incubated at 20  $^\circ\text{C}$  prior to measurement.

### Determination of the rate constants $k_{\text{GSH}}$ and $k_{-\text{GSH}}$ .

Contributions of the forward (expressed by  $k_{\text{GSH}}$ ) and reverse reaction (expressed by  $k_{-\text{GSH}}$ ) to  $k_{\text{obs}}$  in our experimental setup were considered by applying the equation  $k_{\text{obs}} = k_{\text{GSH}}[\text{electrophile}] + k_{-\text{GSH}}$ .<sup>S6b</sup>

First-order rate constant  $k_{\text{obs}}$  ( $\text{s}^{-1}$ ) for individual kinetic runs were determined by fitting the mono-exponential function  $A_t = A_0 \cdot \exp^{-k_{\text{obs}}t} + C$  to the observed  $A_t$  (at 412 nm).

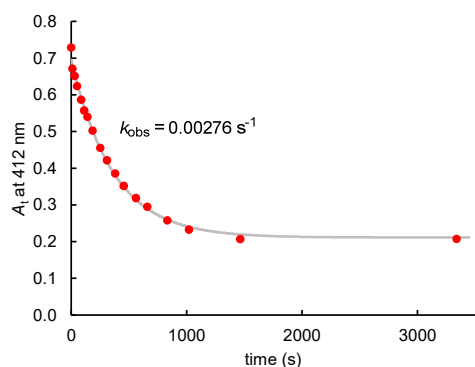

Decay of the thiophenolate absorbance (red dots) during the reaction of GSH (0.15 mM) with cyclopentenone **1a** (3.75 mM) in water (pH = 7.40, phosphate buffer) and fitted curve (grey, for  $k_{\text{obs}}$  determination).

At the end of our kinetic GSH chemoassays used to determine the rates of GSH adduct formation with excess Michael acceptors, the remaining (free) GSH is quantitatively trapped by the DTNB reagent. This GSH trapping eliminates the entire GSH from the equilibrium with the electrophile. Thus, it triggers the reverse reaction to re-establish the GSH/enone/Michael adduct equilibrium. In this way, the reverse reaction (that is, Michael adduct dissociation) can be monitored at 412 nm.<sup>S6c</sup>

Photometric tracing the solutions of the chemoassays for the Michael acceptors **2a**, **4a**, **4b**, **5a**, and **5b** did not indicate GSH formation over a time of 10 hours (at r.t. under aerobic conditions). However, a significant increase of absorption due to further DTNB consumption by released GSH was observed for the GSH-cyclopentenone (**1a**) adduct and, in a much slower process, for the GSH-**1b** adduct. For the retro-Michael addition of the GSH-**1a** adduct a first-order rate constant of  $k = 2.8 \times 10^{-4} \text{ s}^{-1}$  ( $t_{1/2} = 40 \text{ min}$ ) was roughly determined. Esterbauer and colleagues reported  $k(20 \text{ }^\circ\text{C}) = 5.16 \times 10^{-6} \text{ s}^{-1}$  ( $t_{1/2} = 37 \text{ h}$ ) for the dissociation of the GSH-cyclohexenone (**2a**) adduct.<sup>S6c</sup>

Linear correlations were obtained for all investigated GSH/electrophile couples by plotting  $k_{\text{obs}}$  vs [enone]. The slope of a  $k_{\text{obs}}$  vs [enone] plot corresponds to the second-order rate constant  $k_{\text{GSH}}$  ( $\text{M}^{-1} \text{ s}^{-1}$ ) and intercept on the ordinate reflects (in theory) the contribution of the retro-Michael addition ( $k_{-\text{GSH}}$ ). Our experiments do not allow to derive  $k_{-\text{GSH}}$  reliably from the intercepts on the ordinate, however, because these intercepts are usually at least one order of magnitude smaller than the values of the slopes and, thus, in the range of the experimental error.

**GSH + 1a** in H<sub>2</sub>O

| [GSH] <sub>0</sub> , M  | [1a] <sub>0</sub> , M   | k <sub>obs</sub> , s <sup>-1</sup> |
|-------------------------|-------------------------|------------------------------------|
| 1.50 × 10 <sup>-4</sup> | 1.88 × 10 <sup>-3</sup> | 1.52 × 10 <sup>-3</sup>            |
| 1.50 × 10 <sup>-4</sup> | 3.75 × 10 <sup>-3</sup> | 2.76 × 10 <sup>-3</sup>            |
| 1.50 × 10 <sup>-4</sup> | 5.63 × 10 <sup>-3</sup> | 4.77 × 10 <sup>-3</sup>            |
| 1.50 × 10 <sup>-4</sup> | 7.50 × 10 <sup>-3</sup> | 6.69 × 10 <sup>-3</sup>            |

$$k_2 = (9.34 \pm 0.66) \times 10^{-1} \text{ M}^{-1} \text{ s}^{-1}$$

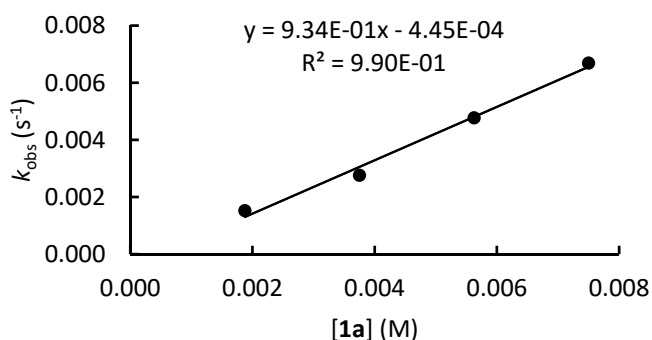**GSH + 2a** in H<sub>2</sub>O

| [GSH] <sub>0</sub> , M  | [2a] <sub>0</sub> , M   | k <sub>obs</sub> , s <sup>-1</sup> |
|-------------------------|-------------------------|------------------------------------|
| 1.50 × 10 <sup>-4</sup> | 3.75 × 10 <sup>-3</sup> | 4.14 × 10 <sup>-4</sup>            |
| 1.50 × 10 <sup>-4</sup> | 7.50 × 10 <sup>-3</sup> | 8.23 × 10 <sup>-4</sup>            |
| 1.50 × 10 <sup>-4</sup> | 1.13 × 10 <sup>-2</sup> | 1.37 × 10 <sup>-3</sup>            |
| 1.50 × 10 <sup>-4</sup> | 1.50 × 10 <sup>-2</sup> | 1.71 × 10 <sup>-3</sup>            |

$$k_2 = (1.18 \pm 0.07) \times 10^{-1} \text{ M}^{-1} \text{ s}^{-1}$$

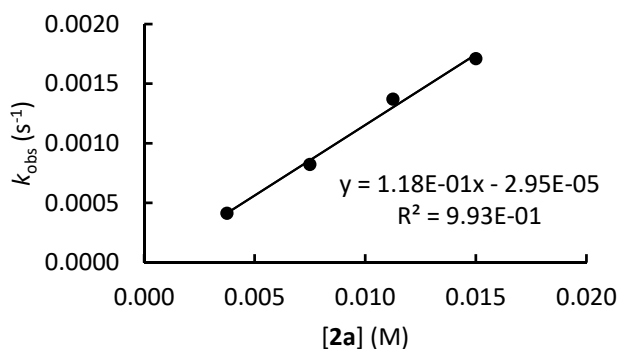**GSH + 4a** in H<sub>2</sub>O

| [GSH] <sub>0</sub> , M  | [4a] <sub>0</sub> , M   | k <sub>obs</sub> , s <sup>-1</sup> |
|-------------------------|-------------------------|------------------------------------|
| 1.50 × 10 <sup>-4</sup> | 7.50 × 10 <sup>-3</sup> | 1.64 × 10 <sup>-4</sup>            |
| 1.50 × 10 <sup>-4</sup> | 1.50 × 10 <sup>-2</sup> | 2.91 × 10 <sup>-4</sup>            |
| 1.50 × 10 <sup>-4</sup> | 2.25 × 10 <sup>-2</sup> | 4.31 × 10 <sup>-4</sup>            |
| 1.50 × 10 <sup>-4</sup> | 3.00 × 10 <sup>-2</sup> | 6.00 × 10 <sup>-4</sup>            |

$$k_2 = (1.93 \pm 0.09) \times 10^{-2} \text{ M}^{-1} \text{ s}^{-1}$$

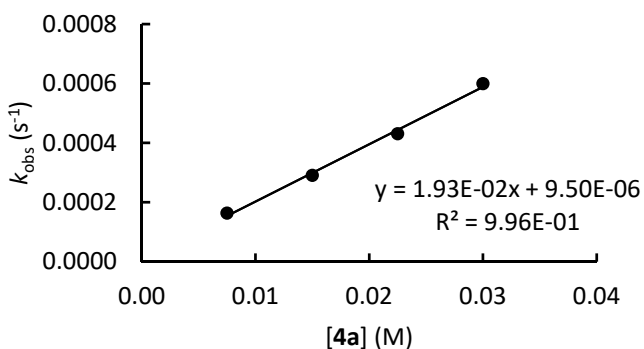**GSH + 4b** in H<sub>2</sub>O

| [GSH] <sub>0</sub> , M  | [4b] <sub>0</sub> , M   | k <sub>obs</sub> , s <sup>-1</sup> |
|-------------------------|-------------------------|------------------------------------|
| 1.50 × 10 <sup>-4</sup> | 3.00 × 10 <sup>-3</sup> | 1.02 × 10 <sup>-3</sup>            |
| 1.50 × 10 <sup>-4</sup> | 5.00 × 10 <sup>-3</sup> | 2.38 × 10 <sup>-3</sup>            |
| 1.50 × 10 <sup>-4</sup> | 8.00 × 10 <sup>-3</sup> | 3.72 × 10 <sup>-3</sup>            |
| 1.50 × 10 <sup>-4</sup> | 1.00 × 10 <sup>-2</sup> | 5.21 × 10 <sup>-3</sup>            |

$$k_2 = (5.75 \pm 0.40) \times 10^{-1} \text{ M}^{-1} \text{ s}^{-1}$$

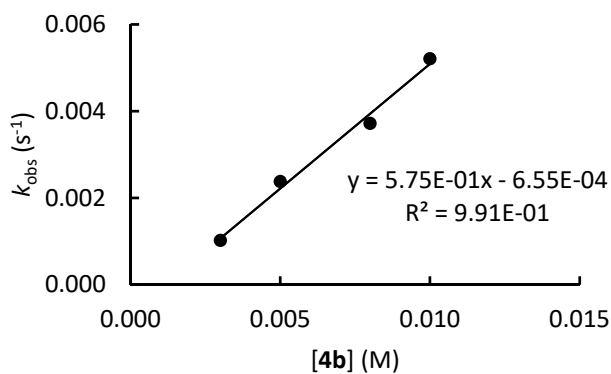

### GSH + 5a in H<sub>2</sub>O

| [GSH] <sub>0</sub> , M  | [5a] <sub>0</sub> , M   | <i>k</i> <sub>obs</sub> , s <sup>-1</sup> |
|-------------------------|-------------------------|-------------------------------------------|
| 1.50 × 10 <sup>-4</sup> | 7.50 × 10 <sup>-3</sup> | 1.14 × 10 <sup>-3</sup>                   |
| 1.50 × 10 <sup>-4</sup> | 1.50 × 10 <sup>-2</sup> | 2.48 × 10 <sup>-3</sup>                   |
| 1.50 × 10 <sup>-4</sup> | 2.25 × 10 <sup>-2</sup> | 4.20 × 10 <sup>-3</sup>                   |
| 1.50 × 10 <sup>-4</sup> | 3.00 × 10 <sup>-2</sup> | 4.99 × 10 <sup>-3</sup>                   |

$$k_2 = (1.77 \pm 0.17) \times 10^{-1} \text{ M}^{-1} \text{ s}^{-1}$$

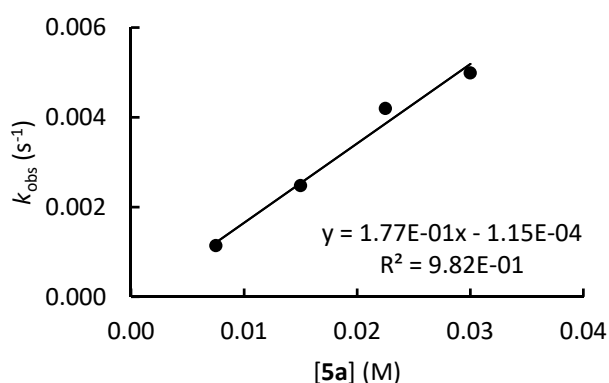

### GSH + 5b in H<sub>2</sub>O

| [GSH] <sub>0</sub> , M  | [5b] <sub>0</sub> , M   | <i>k</i> <sub>obs</sub> , s <sup>-1</sup> |
|-------------------------|-------------------------|-------------------------------------------|
| 1.50 × 10 <sup>-4</sup> | 3.00 × 10 <sup>-3</sup> | 3.60 × 10 <sup>-3</sup>                   |
| 1.50 × 10 <sup>-4</sup> | 6.00 × 10 <sup>-3</sup> | 7.13 × 10 <sup>-3</sup>                   |
| 1.50 × 10 <sup>-4</sup> | 9.00 × 10 <sup>-3</sup> | 1.10 × 10 <sup>-2</sup>                   |
| 1.50 × 10 <sup>-4</sup> | 1.20 × 10 <sup>-2</sup> | 1.66 × 10 <sup>-2</sup>                   |

$$k_2 = 1.43 \pm 0.11 \text{ M}^{-1} \text{ s}^{-1}$$

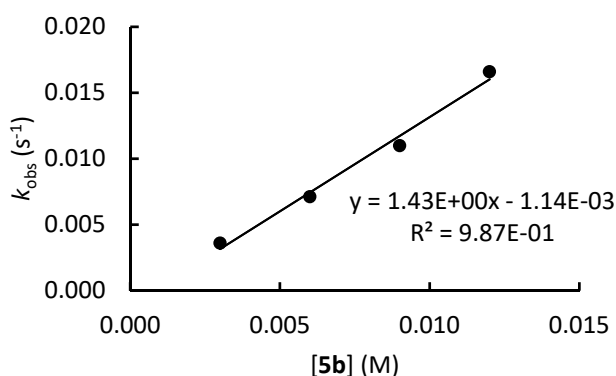

## Crystallographic Data

The X-ray intensity data of **8**, **12(D1)**, **15(D1)**, **16(D1)**, **17(D1)**, **18** and **26(D1)** were measured on a Bruker D8 Venture TXS system equipped with a multilayer mirror monochromator and a Mo K $\alpha$  rotating anode X-ray tube ( $\lambda = 0.71073 \text{ \AA}$ ). The frames were integrated with the Bruker SAINT software package.<sup>57</sup> Data were corrected for absorption effects using the Multi-Scan method (SADABS).<sup>58</sup> The structures were solved and refined using the Bruker SHELXTL Software Package.<sup>59</sup> All hydrogen atoms have been calculated in ideal geometry riding on their parent atoms. In **12(D1)**, the O-atom is disordered; the site occupation factor ratio of the two parts refined to 0.966/0.034. The figures have been drawn at the 50% ellipsoid probability level. The less-occupied moieties of disordered parts have been omitted for the figures. Crystallographic data have been deposited with the Cambridge Crystallographic Data Centre, CCDC, 12 Union Road, Cambridge CB21EZ, UK. Copies of the data can be obtained free of charge on quoting the depository numbers CCDC (<https://www.ccdc.cam.ac.uk/structures/>).



Crystallographic data for **8**.

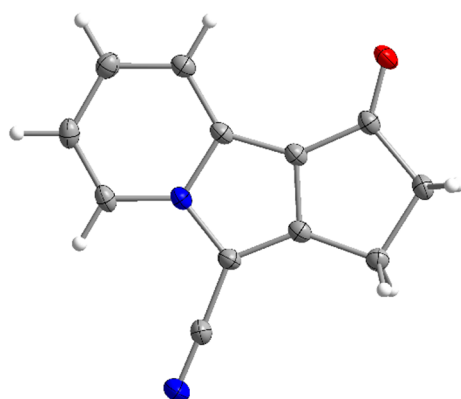

(wv580)

Molecular structure of **8** drawn at the 50% ellipsoid probability level at  $T = 108$  K (CCDC 2044215).

|                                            |                                   |
|--------------------------------------------|-----------------------------------|
| net formula                                | $C_{12}H_8N_2O$                   |
| $M_r/g\ mol^{-1}$                          | 196.20                            |
| crystal size/mm                            | $0.100 \times 0.030 \times 0.020$ |
| $T/K$                                      | 108.(2)                           |
| radiation                                  | MoK $\alpha$                      |
| diffractometer                             | 'Bruker D8 Venture TXS'           |
| crystal system                             | monoclinic                        |
| space group                                | 'P 1 21/c 1'                      |
| $a/\text{\AA}$                             | 14.2681(7)                        |
| $b/\text{\AA}$                             | 3.9182(2)                         |
| $c/\text{\AA}$                             | 17.1782(10)                       |
| $\alpha/^\circ$                            | 90                                |
| $\beta/^\circ$                             | 109.954(2)                        |
| $\gamma/^\circ$                            | 90                                |
| $V/\text{\AA}^3$                           | 902.70(8)                         |
| $Z$                                        | 4                                 |
| calc. density/ $g\ cm^{-3}$                | 1.444                             |
| $\mu/mm^{-1}$                              | 0.095                             |
| absorption correction                      | Multi-Scan                        |
| transmission factor range                  | 0.86–1.00                         |
| refls. measured                            | 8211                              |
| $R_{int}$                                  | 0.0394                            |
| mean $\sigma(I)/I$                         | 0.0335                            |
| $\theta$ range                             | 3.219–26.732                      |
| observed refls.                            | 1521                              |
| $x, y$ (weighting scheme)                  | 0.0426, 0.5869                    |
| hydrogen refinement                        | constr                            |
| refls in refinement                        | 1897                              |
| parameters                                 | 136                               |
| restraints                                 | 0                                 |
| $R(F_{obs})$                               | 0.0460                            |
| $R_w(F^2)$                                 | 0.1119                            |
| $S$                                        | 1.089                             |
| shift/error $_{max}$                       | 0.001                             |
| max electron density/ $e\ \text{\AA}^{-3}$ | 0.243                             |
| min electron density/ $e\ \text{\AA}^{-3}$ | -0.243                            |

Crystallographic data for **12(D1)**

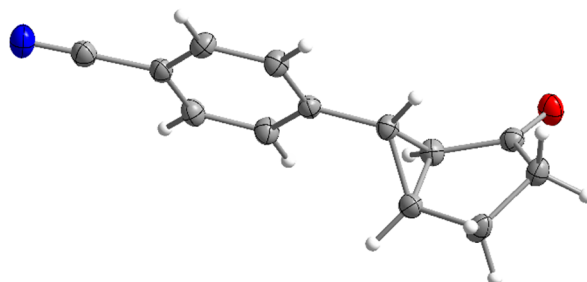

(yv471)

Molecular structure drawn at the 50% ellipsoid probability level at  $T = 102$  K (CCDC 2044216).

|                                            |                                   |
|--------------------------------------------|-----------------------------------|
| net formula                                | $C_{13}H_{11}NO$                  |
| $M_r/g\ mol^{-1}$                          | 197.23                            |
| crystal size/mm                            | $0.120 \times 0.100 \times 0.090$ |
| $T/K$                                      | 102.(2)                           |
| radiation                                  | MoK $\alpha$                      |
| diffractometer                             | 'Bruker D8 Venture TXS'           |
| crystal system                             | monoclinic                        |
| space group                                | 'P 1 21/c 1'                      |
| $a/\text{\AA}$                             | 10.8844(9)                        |
| $b/\text{\AA}$                             | 9.9707(7)                         |
| $c/\text{\AA}$                             | 9.1680(7)                         |
| $\alpha/^\circ$                            | 90                                |
| $\beta/^\circ$                             | 91.835(3)                         |
| $\gamma/^\circ$                            | 90                                |
| $V/\text{\AA}^3$                           | 994.45(13)                        |
| $Z$                                        | 4                                 |
| calc. density/ $g\ cm^{-3}$                | 1.317                             |
| $\mu/mm^{-1}$                              | 0.084                             |
| absorption correction                      | Multi-Scan                        |
| transmission factor range                  | 0.93–0.99                         |
| refls. measured                            | 17273                             |
| $R_{int}$                                  | 0.0482                            |
| mean $\sigma(I)/I$                         | 0.0321                            |
| $\theta$ range                             | 3.019–28.282                      |
| observed refls.                            | 2059                              |
| $x, y$ (weighting scheme)                  | 0.0483, 0.4815                    |
| hydrogen refinement                        | constr                            |
| refls in refinement                        | 2461                              |
| parameters                                 | 141                               |
| restraints                                 | 0                                 |
| $R(F_{obs})$                               | 0.0415                            |
| $R_w(F^2)$                                 | 0.1163                            |
| $S$                                        | 1.043                             |
| shift/error $_{max}$                       | 0.001                             |
| max electron density/ $e\ \text{\AA}^{-3}$ | 0.241                             |
| min electron density/ $e\ \text{\AA}^{-3}$ | -0.214                            |

Crystallographic data for **15(D1)**

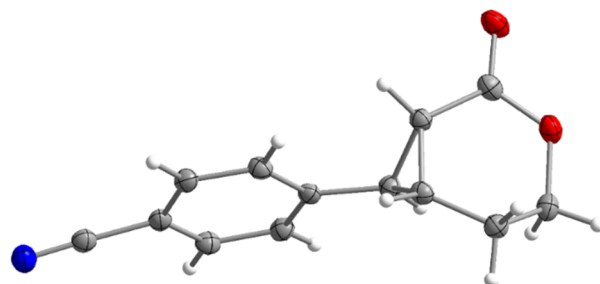

(wv581)

Molecular structure drawn at the 50% ellipsoid probability level at  $T = 108$  K (CCDC 2044217).

|                                            |                                   |
|--------------------------------------------|-----------------------------------|
| net formula                                | $C_{13}H_{11}NO_2$                |
| $M_r/g\ mol^{-1}$                          | 213.23                            |
| crystal size/mm                            | $0.080 \times 0.060 \times 0.050$ |
| $T/K$                                      | 108.(2)                           |
| radiation                                  | MoK $\alpha$                      |
| diffractometer                             | 'Bruker D8 Venture TXS'           |
| crystal system                             | monoclinic                        |
| space group                                | 'P 1 21/c 1'                      |
| $a/\text{\AA}$                             | 10.6358(4)                        |
| $b/\text{\AA}$                             | 9.5636(4)                         |
| $c/\text{\AA}$                             | 10.4269(4)                        |
| $\alpha/^\circ$                            | 90                                |
| $\beta/^\circ$                             | 100.187(2)                        |
| $\gamma/^\circ$                            | 90                                |
| $V/\text{\AA}^3$                           | 1043.87(7)                        |
| $Z$                                        | 4                                 |
| calc. density/ $g\ cm^{-3}$                | 1.357                             |
| $\mu/mm^{-1}$                              | 0.092                             |
| absorption correction                      | Multi-Scan                        |
| transmission factor range                  | 0.92–0.99                         |
| refls. measured                            | 10661                             |
| $R_{int}$                                  | 0.0344                            |
| mean $\sigma(I)/I$                         | 0.0279                            |
| $\theta$ range                             | 2.885–27.081                      |
| observed refls.                            | 1971                              |
| $x, y$ (weighting scheme)                  | 0.0433, 0.5066                    |
| hydrogen refinement                        | constr                            |
| Flack parameter                            | ?                                 |
| refls in refinement                        | 2298                              |
| parameters                                 | 145                               |
| restraints                                 | 0                                 |
| $R(F_{obs})$                               | 0.0401                            |
| $R_w(F^2)$                                 | 0.1025                            |
| $S$                                        | 1.036                             |
| shift/error $_{max}$                       | 0.001                             |
| max electron density/ $e\ \text{\AA}^{-3}$ | 0.243                             |
| min electron density/ $e\ \text{\AA}^{-3}$ | -0.205                            |

Crystallographic data for **16(D1)**

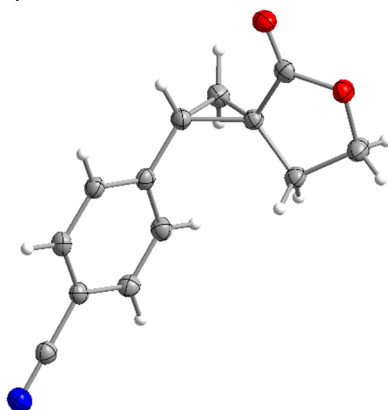

(vv629)

Molecular structure drawn at the 50% ellipsoid probability level at  $T = 103$  K (CCDC 2044218).

|                                            |                                   |
|--------------------------------------------|-----------------------------------|
| net formula                                | $C_{13}H_{11}NO_2$                |
| $M_r/g\ mol^{-1}$                          | 213.23                            |
| crystal size/mm                            | $0.100 \times 0.080 \times 0.050$ |
| $T/K$                                      | 103.(2)                           |
| radiation                                  | MoK $\alpha$                      |
| diffractometer                             | 'Bruker D8 Venture TXS'           |
| crystal system                             | monoclinic                        |
| space group                                | 'P 1 21/n 1'                      |
| $a/\text{\AA}$                             | 12.1957(10)                       |
| $b/\text{\AA}$                             | 7.1469(5)                         |
| $c/\text{\AA}$                             | 12.4085(11)                       |
| $\alpha/^\circ$                            | 90                                |
| $\beta/^\circ$                             | 105.197(3)                        |
| $\gamma/^\circ$                            | 90                                |
| $V/\text{\AA}^3$                           | 1043.72(15)                       |
| $Z$                                        | 4                                 |
| calc. density/ $g\ cm^{-3}$                | 1.357                             |
| $\mu/mm^{-1}$                              | 0.092                             |
| absorption correction                      | Multi-Scan                        |
| transmission factor range                  | 0.94–0.99                         |
| refls. measured                            | 14056                             |
| $R_{int}$                                  | 0.0402                            |
| mean $\sigma(I)/I$                         | 0.0254                            |
| $\theta$ range                             | 3.320–26.371                      |
| observed refls.                            | 1670                              |
| $x, y$ (weighting scheme)                  | 0.0342, 0.9886                    |
| hydrogen refinement                        | constr                            |
| refls in refinement                        | 2124                              |
| parameters                                 | 145                               |
| restraints                                 | 0                                 |
| $R(F_{obs})$                               | 0.0431                            |
| $R_w(F^2)$                                 | 0.1092                            |
| $S$                                        | 1.054                             |
| shift/error $_{max}$                       | 0.001                             |
| max electron density/ $e\ \text{\AA}^{-3}$ | 0.181                             |
| min electron density/ $e\ \text{\AA}^{-3}$ | -0.261                            |

Crystallographic data for **17(D1)**

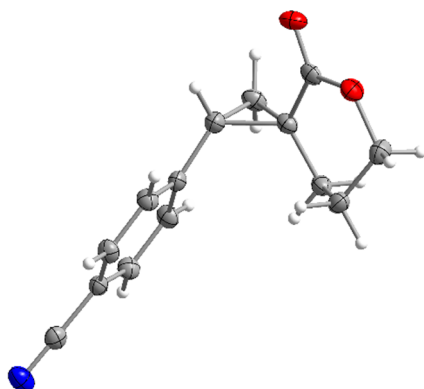

(wv638)

Molecular structure drawn at the 50% ellipsoid probability level at  $T = 112$  K (CCDC 2044219).

|                                            |                                   |
|--------------------------------------------|-----------------------------------|
| net formula                                | $C_{14}H_{13}NO_2$                |
| $M_r/g\ mol^{-1}$                          | 227.25                            |
| crystal size/mm                            | $0.080 \times 0.030 \times 0.030$ |
| $T/K$                                      | 112.(2)                           |
| radiation                                  | MoK $\alpha$                      |
| diffractometer                             | 'Bruker D8 Venture TXS'           |
| crystal system                             | monoclinic                        |
| space group                                | 'P 1 21/c 1'                      |
| $a/\text{\AA}$                             | 11.6656(4)                        |
| $b/\text{\AA}$                             | 9.4061(4)                         |
| $c/\text{\AA}$                             | 10.7626(5)                        |
| $\alpha/^\circ$                            | 90                                |
| $\beta/^\circ$                             | 97.797(2)                         |
| $\gamma/^\circ$                            | 90                                |
| $V/\text{\AA}^3$                           | 1170.04(8)                        |
| $Z$                                        | 4                                 |
| calc. density/ $g\ cm^{-3}$                | 1.290                             |
| $\mu/mm^{-1}$                              | 0.087                             |
| absorption correction                      | Multi-Scan                        |
| transmission factor range                  | 0.92–1.00                         |
| refls. measured                            | 11194                             |
| $R_{int}$                                  | 0.0421                            |
| mean $\sigma(I)/I$                         | 0.0367                            |
| $\theta$ range                             | 3.246–26.363                      |
| observed refls.                            | 1856                              |
| $x, y$ (weighting scheme)                  | 0.0360, 0.5952                    |
| hydrogen refinement                        | constr                            |
| refls in refinement                        | 2388                              |
| parameters                                 | 154                               |
| restraints                                 | 0                                 |
| $R(F_{obs})$                               | 0.0434                            |
| $R_w(F^2)$                                 | 0.1005                            |
| $S$                                        | 1.032                             |
| shift/error $_{max}$                       | 0.001                             |
| max electron density/ $e\ \text{\AA}^{-3}$ | 0.226                             |
| min electron density/ $e\ \text{\AA}^{-3}$ | -0.199                            |

Crystallographic data for **18**

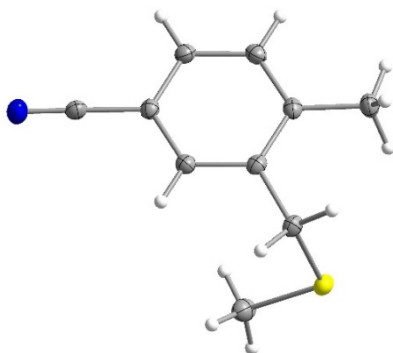

(vv592)

Molecular structure drawn at the 50% ellipsoid probability level at  $T = 103$  K (CCDC 2044220).

|                                            |                                   |
|--------------------------------------------|-----------------------------------|
| net formula                                | $C_{10}H_{11}NS$                  |
| $M_r/g\ mol^{-1}$                          | 177.26                            |
| crystal size/mm                            | $0.080 \times 0.060 \times 0.030$ |
| $T/K$                                      | 103.(2)                           |
| radiation                                  | MoK $\alpha$                      |
| diffractometer                             | 'Bruker D8 Venture TXS'           |
| crystal system                             | triclinic                         |
| space group                                | 'P -1'                            |
| $a/\text{\AA}$                             | 7.3211(2)                         |
| $b/\text{\AA}$                             | 7.9973(2)                         |
| $c/\text{\AA}$                             | 8.7918(3)                         |
| $\alpha/^\circ$                            | 69.1780(10)                       |
| $\beta/^\circ$                             | 74.1170(10)                       |
| $\gamma/^\circ$                            | 83.7140(10)                       |
| $V/\text{\AA}^3$                           | 462.72(2)                         |
| $Z$                                        | 2                                 |
| calc. density/ $g\ cm^{-3}$                | 1.272                             |
| $\mu/mm^{-1}$                              | 0.291                             |
| absorption correction                      | Multi-Scan                        |
| transmission factor range                  | 0.9226–0.9705                     |
| refls. measured                            | 8722                              |
| $R_{int}$                                  | 0.0244                            |
| mean $\sigma(I)/I$                         | 0.0205                            |
| $\theta$ range                             | 3.345–27.099                      |
| observed refls.                            | 1867                              |
| $x, y$ (weighting scheme)                  | 0.0274, 0.2230                    |
| hydrogen refinement                        | constr                            |
| refls in refinement                        | 2031                              |
| parameters                                 | 111                               |
| restraints                                 | 0                                 |
| $R(F_{obs})$                               | 0.0266                            |
| $R_w(F^2)$                                 | 0.0704                            |
| $S$                                        | 1.065                             |
| shift/error $_{max}$                       | 0.001                             |
| max electron density/ $e\ \text{\AA}^{-3}$ | 0.295                             |
| min electron density/ $e\ \text{\AA}^{-3}$ | -0.192                            |

Crystallographic data for **26(D1)**

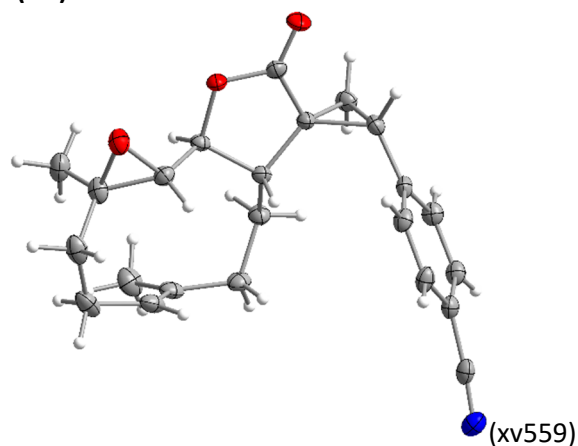

Molecular structure drawn at the 50% ellipsoid probability level at  $T = 103$  K (CCDC 2044221).

|                                            |                                   |
|--------------------------------------------|-----------------------------------|
| net formula                                | $C_{23}H_{25}NO_3$                |
| $M_r/g\ mol^{-1}$                          | 363.44                            |
| crystal size/mm                            | $0.100 \times 0.040 \times 0.020$ |
| $T/K$                                      | 103.(2)                           |
| radiation                                  | MoK $\alpha$                      |
| diffractometer                             | 'Bruker D8 Venture TXS'           |
| crystal system                             | monoclinic                        |
| space group                                | 'C 1 2 1'                         |
| $a/\text{\AA}$                             | 21.9099(11)                       |
| $b/\text{\AA}$                             | 6.5137(4)                         |
| $c/\text{\AA}$                             | 14.4743(8)                        |
| $\alpha/^\circ$                            | 90                                |
| $\beta/^\circ$                             | 115.663(2)                        |
| $\gamma/^\circ$                            | 90                                |
| $V/\text{\AA}^3$                           | 1861.93(18)                       |
| $Z$                                        | 4                                 |
| calc. density/ $g\ cm^{-3}$                | 1.297                             |
| $\mu/mm^{-1}$                              | 0.085                             |
| absorption correction                      | Multi-Scan                        |
| transmission factor range                  | 0.94–1.00                         |
| refls. measured                            | 10760                             |
| $R_{int}$                                  | 0.0360                            |
| mean $\sigma(I)/I$                         | 0.0431                            |
| $\theta$ range                             | 3.080–26.370                      |
| observed refls.                            | 3410                              |
| $x, y$ (weighting scheme)                  | 0.0438, 1.4361                    |
| hydrogen refinement                        | constr                            |
| Flack parameter                            | -0.2(6)                           |
| refls in refinement                        | 3790                              |
| parameters                                 | 246                               |
| restraints                                 | 1                                 |
| $R(F_{obs})$                               | 0.0423                            |
| $R_w(F^2)$                                 | 0.1041                            |
| $S$                                        | 1.070                             |
| shift/error $_{max}$                       | 0.001                             |
| max electron density/ $e\ \text{\AA}^{-3}$ | 0.177                             |
| min electron density/ $e\ \text{\AA}^{-3}$ | -0.185                            |

## Computational Details

Initially, all structures were subjected to a conformational search with the OPLS3<sup>S10</sup> force field as implemented in MacroModel<sup>S11</sup> with the MCMC method in gas phase. All subsequent quantum-chemical calculations were performed with the Gaussian 16 A.03 set of codes.<sup>S12</sup> All structures were optimized at the M06-2X/6-31+G(d,p)<sup>S13</sup> level of theory considering solvation by the SMD model for DMSO.<sup>S14</sup> Thermal corrections at 298 K were obtained at the same level of theory from vibrational frequencies and are unscaled. Transition states were validated by the presence of one imaginary frequency and IRC calculations. All conformers were Boltzmann weighted. Finally, a free energy correction +7.91 kJ mol<sup>-1</sup> was applied to all free energies to consider the conversion from gas phase (1 atm) to liquid phase (1 M).

The distortion-interaction analysis was performed either on the whole reaction pathway obtained from IRC calculations (the Hessian was recalculated every 3 steps) or alternatively, when two transition states with highly similar C-C bond lengths were compared, directly at the TS geometries. Input files for the DIA calculations were prepared using the autoDIAS python script.<sup>S15</sup> For a recent protocols article on the method, see ref. S16.

SAPT<sup>S17</sup> calculations were performed with the PSI4 (v1.3.2) package<sup>S18</sup> on the same points used for the distortion-interaction analysis. For the computations, the SAPT0 method was used together with the jun-cc-pvdz basis set applying “df” as option for scf\_type. Such a computation produces both the SAPT0/jun-cc-pvdz as well as the scaled sSAPT0/jun-cc-pvdz energies as output of which we used the latter for our analysis as recommended recently.<sup>S17b</sup>

**Table S2.** Electronic and Gibbs energies for all species at the SMD(DMSO)/M06-2X/6-31+G(d,p) level.

| Compound                          | Filename (.log)     | $E_{\text{tot}}$ (hartree) | $G_{298}$ (hartree) | Weighting |
|-----------------------------------|---------------------|----------------------------|---------------------|-----------|
| <b>7</b>                          | sy_1                | -840.355846                | -840.212336         | 0.8595    |
|                                   | sy_2                | -840.354449                | -840.210628         | 0.1405    |
|                                   | weighted:           |                            | -840.212096         |           |
|                                   | dimethylsulfide     | -477.935305                | -477.885651         |           |
| <b>1a + 7</b>                     |                     |                            |                     |           |
| <b>1a</b>                         | 1a                  | -269.254647                | -269.184823         |           |
| <i>trans</i> -TS1 ( <b>1a+7</b> ) | 1a_sy_tr_1_ts1      | -1109.598903               | -1109.362268        | 0.0063    |
|                                   | 1a_sy_tr_3_ts1      | -1109.604033               | -1109.366342        | 0.4716    |
|                                   | 1a_sy_tr_3_ts1_rot1 | -1109.598903               | -1109.362272        | 0.0063    |
|                                   | 1a_sy_tr_5_ts1      | -1109.598272               | -1109.361096        | 0.0018    |
|                                   | 1a_sy_tr_7_ts1      | -1109.600123               | -1109.364118        | 0.0446    |
|                                   | 1a_sy_tr_8_ts1      | -1109.604033               | -1109.366334        | 0.4676    |
|                                   | 1a_sy_tr_9_ts1      | -1109.600799               | -1109.361046        | 0.0017    |
|                                   | weighted:           |                            | -1109.366169        |           |
| <i>trans</i> -IM ( <b>1a+7</b> )  | 1a_sy_tr_1          | -1109.625308               | -1109.385434        | 0.0112    |
|                                   | 1a_sy_tr_2          | -1109.625716               | -1109.384735        | 0.0053    |



|                              |                 |                                   |              |                      |
|------------------------------|-----------------|-----------------------------------|--------------|----------------------|
|                              | 1a_sy_tr_3      | -1109.629946                      | -1109.389085 | 0.5385               |
|                              | 1a_sy_tr_4      | -1109.626523                      | -1109.387140 | 0.0685               |
|                              | 1a_sy_tr_5      | -1109.628148                      | -1109.388018 | 0.1738               |
|                              | 1a_sy_tr_6      | -1109.628036                      | -1109.387753 | 0.1312               |
|                              | 1a_sy_tr_7      | -1109.626480                      | -1109.386745 | 0.0451               |
|                              | 1a_sy_tr_8      | -1109.622710                      | -1109.380750 | 0.0001               |
|                              | 1a_sy_tr_9      | -1109.625757                      | -1109.385433 | 0.0112               |
|                              | 1a_sy_tr_10     | -1109.620392                      | -1109.379087 | 0.0000               |
|                              | 1a_sy_tr_11     | -1109.623366                      | -1109.382999 | 0.0008               |
|                              | 1a_sy_tr_12     | -1109.623916                      | -1109.384662 | 0.0050               |
|                              | 1a_sy_tr_13     | -1109.625495                      | -1109.383970 | 0.0024               |
|                              | 1a_sy_tr_14     | -1109.619529                      | -1109.378647 | 0.0000               |
|                              | 1a_sy_tr_15     | -1109.623600                      | -1109.382813 | 0.0007               |
|                              | 1a_sy_tr_16     | -1109.616295                      | -1109.375284 | 0.0000               |
|                              | 1a_sy_tr_17     | -1109.624947                      | -1109.384889 | 0.0063               |
|                              | 1a_sy_tr_18     | -1109.617760                      | -1109.375792 | 0.0000               |
|                              | weighted:       |                                   | -1109.388310 |                      |
| <i>trans</i> -TS2 (1a+7)     | 1a_sy_tr_5_ts2  | -1109.619245                      | -1109.380612 | 0.3755               |
|                              | 1a_sy_tr_7_ts2  | -1109.618109                      | -1109.379913 | 0.1789               |
|                              | 1a_sy_tr_15_ts2 | -1109.615788                      | -1109.376805 | 0.0066               |
|                              | 1a_sy_tr_17_ts2 | -1109.618447                      | -1109.380759 | 0.4390               |
|                              | weighted:       |                                   | -1109.380526 |                      |
| <i>trans</i> -product (1a+7) | 1a_sy_tr_prod_1 | -631.741910                       | -631.572455  | 1.0000               |
|                              | weighted:       |                                   | -631.572455  |                      |
|                              |                 | $G_{\text{trans}}^{\ddagger}$     | 73.5         | $\text{kJ mol}^{-1}$ |
|                              |                 | $G_{\text{IM, trans}}^0$          | 15.3         | $\text{kJ mol}^{-1}$ |
|                              |                 | $G_{\text{cp, trans}}^{\ddagger}$ | 35.8         | $\text{kJ mol}^{-1}$ |
|                              |                 | $G_{\text{trans}}^0$              | -160.0       | $\text{kJ mol}^{-1}$ |
| <i>cis</i> -TS1 (1a+7)       | 1a_sy_c_1_ts1   | -1109.594532                      | -1109.357683 | 0.0023               |
|                              | 1a_sy_c_2_ts1   | -1109.596717                      | -1109.358648 | 0.0063               |
|                              | 1a_sy_c_3_ts1   | -1109.599461                      | -1109.363347 | 0.9131               |
|                              | 1a_sy_c_4_ts1   | -1109.596602                      | -1109.360183 | 0.0319               |
|                              | 1a_sy_c_7_ts1   | -1109.597215                      | -1109.360538 | 0.0465               |
|                              | weighted:       |                                   | -1109.363073 |                      |
| <i>cis</i> -IM (1a+7)        | 1a_sy_c_1       | -1109.619867                      | -1109.379193 | 0.0000               |
|                              | 1a_sy_c_1_r     | -1109.619199                      | -1109.377574 | 0.0000               |
|                              | 1a_sy_c_2       | -1109.628122                      | -1109.387720 | 0.1514               |
|                              | 1a_sy_c_2_r     | -1109.626722                      | -1109.386229 | 0.0311               |
|                              | 1a_sy_c_3       | -1109.627767                      | -1109.388073 | 0.2202               |
|                              | 1a_sy_c_4       | -1109.626849                      | -1109.386179 | 0.0295               |
|                              | 1a_sy_c_5       | -1109.623616                      | -1109.382361 | 0.0005               |
|                              | 1a_sy_c_6       | -1109.627832                      | -1109.386436 | 0.0388               |

|                                     |                |              |              |        |
|-------------------------------------|----------------|--------------|--------------|--------|
|                                     | 1a_sy_c_7      | -1109.628358 | -1109.388215 | 0.2558 |
|                                     | 1a_sy_c_8      | -1109.629117 | -1109.388271 | 0.2715 |
|                                     | 1a_sy_c_8_r    | -1109.622692 | -1109.380877 | 0.0001 |
|                                     | 1a_sy_c_9      | -1109.623551 | -1109.383077 | 0.0011 |
|                                     | weighted:      |              | -1109.387923 |        |
| <i>cis</i> -TS2 ( <b>1a+7</b> )     | 1a_sy_tr_1_ts2 | -1109.609851 | -1109.370427 | 0.0024 |
|                                     | 1a_sy_tr_2_ts2 | -1109.613865 | -1109.376055 | 0.9392 |
|                                     | 1a_sy_tr_8_ts2 | -1109.611967 | -1109.373435 | 0.0584 |
|                                     | weighted:      |              | -1109.375888 |        |
| <i>cis</i> -product ( <b>1a+7</b> ) | 1a_sy_c_prod_1 | -631.738876  | -631.569661  | 1.0000 |
|                                     | weighted:      |              | -631.569661  |        |

|                          |        |                      |
|--------------------------|--------|----------------------|
| $G_{cis}^{\ddagger}$     | 81.6   | $\text{kJ mol}^{-1}$ |
| $G_{IM, cis}^0$          | 16.3   | $\text{kJ mol}^{-1}$ |
| $G_{cp, cis}^{\ddagger}$ | 47.9   | $\text{kJ mol}^{-1}$ |
| $G_{cis}^0$              | -152.7 | $\text{kJ mol}^{-1}$ |

| <b>1b + 7</b>                         |                 |              |              |        |
|---------------------------------------|-----------------|--------------|--------------|--------|
| <b>1b</b>                             | 1b              | -308.557006  | -308.461468  |        |
| <i>trans</i> -TS1 ( <b>1b+7</b> )     | 1b_sy_tr_1_ts1  | -1148.899282 | -1148.637808 | 0.1926 |
|                                       | 1b_sy_tr_2_ts1  | -1148.903732 | -1148.639159 | 0.8071 |
|                                       | 1b_sy_tr_4_ts1  | -1148.894302 | -1148.631711 | 0.0003 |
|                                       | weighted:       |              | -1148.638897 |        |
| <i>trans</i> -IM ( <b>1b+7</b> )      | 1b_sy_tr_1      | -1148.924233 | -1148.656123 | 0.0148 |
|                                       | 1b_sy_tr_1_r    | -1148.921115 | -1148.653803 | 0.0013 |
|                                       | 1b_sy_tr_2      | -1148.926530 | -1148.660045 | 0.9451 |
|                                       | 1b_sy_tr_3      | -1148.915723 | -1148.648427 | 0.0000 |
|                                       | 1b_sy_tr_3_r    | -1148.919162 | -1148.652944 | 0.0005 |
|                                       | 1b_sy_tr_4      | -1148.914301 | -1148.646533 | 0.0000 |
|                                       | 1b_sy_tr_4_r    | -1148.918291 | -1148.650342 | 0.0000 |
|                                       | 1b_sy_tr_5_r    | -1148.923961 | -1148.656632 | 0.0253 |
|                                       | 1b_sy_tr_6      | -1148.922404 | -1148.655817 | 0.0107 |
|                                       | 1b_sy_tr_       | -1148.921184 | -1148.654353 | 0.0023 |
|                                       | weighted:       |              | -1148.659831 |        |
| <i>trans</i> -TS2 ( <b>1b+7</b> )     | 1b_sy_tr_1_ts2  | -1148.915553 | -1148.651428 | 0.5113 |
|                                       | 1b_sy_tr_3_ts2  | -1148.912492 | -1148.648567 | 0.0246 |
|                                       | 1b_sy_tr_5_ts2  | -1148.916502 | -1148.651336 | 0.4641 |
|                                       | weighted:       |              | -1148.651315 |        |
| <i>trans</i> -product ( <b>1b+7</b> ) | 1b_sy_tr_prod_1 | -671.039596  | -670.845628  | 1.0000 |
|                                       | weighted:       |              | -670.845628  |        |

|                                     |                |                                   |              |                      |
|-------------------------------------|----------------|-----------------------------------|--------------|----------------------|
|                                     |                | $G_{\text{trans}}^{\ddagger}$     | 83.7         | $\text{kJ mol}^{-1}$ |
|                                     |                | $G_{\text{IM, trans}}^0$          | 28.8         | $\text{kJ mol}^{-1}$ |
|                                     |                | $G_{\text{cp, trans}}^{\ddagger}$ | 51.1         | $\text{kJ mol}^{-1}$ |
|                                     |                | $G_{\text{trans}}^0$              | -150.9       | $\text{kJ mol}^{-1}$ |
| <i>cis</i> -TS1 ( <b>1b+7</b> )     | 1b_sy_c_1_ts1  | -1148.898970                      | -1148.636706 | 0.0374               |
|                                     | 1b_sy_c_2_ts1  | -1148.895924                      | -1148.631604 | 0.0002               |
|                                     | 1b_sy_c_5_ts1  | -1148.903091                      | -1148.639735 | 0.9272               |
|                                     | 1b_sy_c_7_ts1  | -1148.895968                      | -1148.631432 | 0.0001               |
|                                     | 1b_sy_c_9_ts1  | -1148.900072                      | -1148.636649 | 0.0352               |
|                                     | weighted:      |                                   | -1148.639511 |                      |
| <i>cis</i> -IM ( <b>1b+7</b> )      | 1b_sy_c_1      | -1148.923877                      | -1148.656831 | 0.0988               |
|                                     | 1b_sy_c_2      | -1148.924549                      | -1148.657560 | 0.2139               |
|                                     | 1b_sy_c_2_r    | -1148.920525                      | -1148.653822 | 0.0041               |
|                                     | 1b_sy_c_3      | -1148.921817                      | -1148.654560 | 0.0089               |
|                                     | 1b_sy_c_3_r    | -1148.923673                      | -1148.657351 | 0.1714               |
|                                     | 1b_sy_c_4      | -1148.922023                      | -1148.655541 | 0.0252               |
|                                     | 1b_sy_c_5      | -1148.924316                      | -1148.658191 | 0.4179               |
|                                     | 1b_sy_c_6      | -1148.922539                      | -1148.655652 | 0.0283               |
|                                     | 1b_sy_c_7      | -1148.921669                      | -1148.654367 | 0.0072               |
|                                     | 1b_sy_c_8      | -1148.920771                      | -1148.655049 | 0.0149               |
|                                     | 1b_sy_c_9      | -1148.922391                      | -1148.654605 | 0.0093               |
|                                     | weighted:      |                                   | -1148.657481 |                      |
| <i>cis</i> -TS2 ( <b>1b+7</b> )     | 1b_sy_c_2_ts2  | -1148.909187                      | -1148.644906 | 0.0522               |
|                                     | 1b_sy_c_3_ts2  | -1148.911075                      | -1148.647641 | 0.9478               |
|                                     | weighted:      |                                   | -1148.647499 |                      |
| <i>cis</i> -product ( <b>1b+7</b> ) | 1b_sy_c_prod_1 | -671.038631                       | -670.843098  | 1.0000               |
|                                     | weighted:      |                                   | -670.843098  |                      |
|                                     |                | $G_{\text{cis}}^{\ddagger}$       | 82.1         | $\text{kJ mol}^{-1}$ |
|                                     |                | $G_{\text{IM, cis}}^0$            | 34.9         | $\text{kJ mol}^{-1}$ |
|                                     |                | $G_{\text{cp, cis}}^{\ddagger}$   | 61.2         | $\text{kJ mol}^{-1}$ |
|                                     |                | $G_{\text{cis}}^0$                | -144.3       | $\text{kJ mol}^{-1}$ |

### 1c + 7

|                                   |                |              |              |        |
|-----------------------------------|----------------|--------------|--------------|--------|
| <b>1c</b>                         | 1c             | -308.559579  | -308.464111  |        |
| <i>trans</i> -TS1 ( <b>1c+7</b> ) | 1c_sy_tr_1_ts1 | -1148.897964 | -1148.633780 | 0.1002 |
|                                   | 1c_sy_tr_3_ts1 | -1148.900288 | -1148.634393 | 0.1921 |
|                                   | 1c_sy_tr_4_ts1 | -1148.890393 | -1148.625291 | 0.0000 |
|                                   | 1c_sy_tr_5_ts1 | -1148.897964 | -1148.633779 | 0.1001 |
|                                   | 1c_sy_tr_6_ts1 | -1148.893354 | -1148.629890 | 0.0016 |
|                                   | 1c_sy_tr_7_ts1 | -1148.900280 | -1148.635477 | 0.6060 |
|                                   | 1c_sy_tr_8_ts1 | -1148.883946 | -1148.619500 | 0.0000 |

|                              |                    |                            |              |                      |
|------------------------------|--------------------|----------------------------|--------------|----------------------|
|                              | weighted:          |                            | -1148.634920 |                      |
| <i>trans</i> -IM (1c+7)      | 1c_sy_tr_1         | -1148.923895               | -1148.656063 | 0.3364               |
|                              | 1c_sy_tr_1_r       | -1148.921621               | -1148.654207 | 0.0470               |
|                              | 1c_sy_tr_2         | -1148.923706               | -1148.655727 | 0.2356               |
|                              | 1c_sy_tr_2_r       | -1148.921327               | -1148.653884 | 0.0334               |
|                              | 1c_sy_tr_3         | -1148.922801               | -1148.655927 | 0.2912               |
|                              | 1c_sy_tr_3_r       | -1148.921652               | -1148.653689 | 0.0272               |
|                              | 1c_sy_tr_4         | -1148.915933               | -1148.648386 | 0.0001               |
|                              | 1c_sy_tr_4_r       | -1148.914135               | -1148.645211 | 0.0000               |
|                              | 1c_sy_tr_6         | -1148.922026               | -1148.653756 | 0.0292               |
|                              | 1c_sy_tr_8         | -1148.912723               | -1148.644372 | 0.0000               |
|                              | weighted:          |                            | -1148.655651 |                      |
| <i>trans</i> -TS2 (1c+7)     | 1c_sy_tr_1_ts2     | -1148.913277               | -1148.648062 | 0.5173               |
|                              | 1c_sy_tr_3_ts2     | -1148.913536               | -1148.647973 | 0.4708               |
|                              | 1c_sy_tr_4_ts2     | -1148.909209               | -1148.644509 | 0.0120               |
|                              | weighted:          |                            | -1148.647978 |                      |
| <i>trans</i> -product (1c+7) | 1c_sy_tr_prod_1    | -671.038783                | -670.844292  | 1.0000               |
|                              | weighted:          |                            | -670.844292  |                      |
|                              |                    | $G_{trans}^{\ddagger}$     | 101.1        | $\text{kJ mol}^{-1}$ |
|                              |                    | $G_{IM, trans}^0$          | 46.7         | $\text{kJ mol}^{-1}$ |
|                              |                    | $G_{cp, trans}^{\ddagger}$ | 66.8         | $\text{kJ mol}^{-1}$ |
|                              |                    | $G_{trans}^0$              | -140.5       | $\text{kJ mol}^{-1}$ |
| <i>cis</i> -TS1 (1c+7)       | 1c_sy_c_1_ts1      | -1148.896350               | -1148.631598 | 0.0143               |
|                              | 1c_sy_c_2_ts1      | -1148.898837               | -1148.635293 | 0.7188               |
|                              | 1c_sy_c_2_ts1_rot2 | -1148.899003               | -1148.633883 | 0.1613               |
|                              | 1c_sy_c_3_ts1      | -1148.889646               | -1148.623554 | 0.0000               |
|                              | 1c_sy_c_4_ts1      | -1148.894568               | -1148.631059 | 0.0081               |
|                              | 1c_sy_c_5_ts1      | -1148.894166               | -1148.629198 | 0.0011               |
|                              | 1c_sy_c_6_ts1      | -1148.897410               | -1148.633399 | 0.0965               |
|                              | weighted:          |                            | -1148.634789 |                      |
| <i>cis</i> -IM (1c+7)        | 1c_sy_c_1          | -1148.925402               | -1148.657742 | 0.8734               |
|                              | 1c_sy_c_1_r        | -1148.919706               | -1148.651395 | 0.0010               |
|                              | 1c_sy_c_2          | -1148.922955               | -1148.655814 | 0.1131               |
|                              | 1c_sy_c_2_r        | -1148.920616               | -1148.652602 | 0.0038               |
|                              | 1c_sy_c_3          | -1148.915104               | -1148.646643 | 0.0000               |
|                              | 1c_sy_c_3_r        | -1148.910035               | -1148.641648 | 0.0000               |
|                              | 1c_sy_c_5          | -1148.916494               | -1148.647842 | 0.0000               |
|                              | 1c_sy_c_5_r        | -1148.915963               | -1148.647959 | 0.0000               |
|                              | 1c_sy_c_6          | -1148.921622               | -1148.653379 | 0.0086               |
|                              | weighted:          |                            | -1148.657460 |                      |

|                                     |                          |              |              |                      |
|-------------------------------------|--------------------------|--------------|--------------|----------------------|
| <i>cis</i> -TS2 ( <b>1c+7</b> )     | 1c_sy_c_1_ts2            | -1148.912371 | -1148.645824 | 0.2601               |
|                                     | 1c_sy_c_2_ts2            | -1148.913310 | -1148.646798 | 0.7309               |
|                                     | 1c_sy_c_4_ts2            | -1148.909111 | -1148.642647 | 0.0090               |
|                                     | weighted:                |              | -1148.646507 |                      |
| <i>cis</i> -product ( <b>1c+7</b> ) | 1c_sy_c_prod_1           | -671.038738  | -670.843261  | 1.0000               |
|                                     | weighted:                |              | -670.843261  |                      |
|                                     | $G_{cis}^{\ddagger}$     |              | 101.5        | kJ mol <sup>-1</sup> |
|                                     | $G_{IM, cis}^0$          |              | 41.9         | kJ mol <sup>-1</sup> |
|                                     | $G_{cp, cis}^{\ddagger}$ |              | 70.7         | kJ mol <sup>-1</sup> |
|                                     | $G_{cis}^0$              |              | -137.7       | kJ mol <sup>-1</sup> |

| <b>2a + 7</b>                     |                 |              |              |        |
|-----------------------------------|-----------------|--------------|--------------|--------|
| <b>2a</b>                         | <b>2a</b>       | -308.554827  | -308.456692  |        |
| <i>trans</i> -TS1 ( <b>2a+7</b> ) | 2a_sy_tr_1_ts1  | -1148.894884 | -1148.629917 | 0.0034 |
|                                   | 2a_sy_tr_2_ts1  | -1148.897692 | -1148.631838 | 0.0260 |
|                                   | 2a_sy_tr_3_ts1  | -1148.899940 | -1148.633875 | 0.2251 |
|                                   | 2a_sy_tr_4_ts1  | -1148.900930 | -1148.634997 | 0.7397 |
|                                   | 2a_sy_tr_5_ts1  | -1148.890743 | -1148.625570 | 0.0000 |
|                                   | 2a_sy_tr_6_ts1  | -1148.897008 | -1148.629291 | 0.0017 |
|                                   | 2a_sy_tr_9_ts1  | -1148.895747 | -1148.630080 | 0.0040 |
|                                   | 2a_sy_tr_10_ts1 | -1148.891534 | -1148.624931 | 0.0000 |
|                                   | weighted:       |              | -1148.634615 |        |
| <i>trans</i> -IM ( <b>2a+7</b> )  | 2a_sy_tr_1      | -1148.924672 | -1148.656669 | 0.0399 |
|                                   | 2a_sy_tr_1_r    | -1148.925066 | -1148.657470 | 0.0932 |
|                                   | 2a_sy_tr_2      | -1148.921535 | -1148.652694 | 0.0006 |
|                                   | 2a_sy_tr_2_r    | -1148.925047 | -1148.656087 | 0.0215 |
|                                   | 2a_sy_tr_3      | -1148.926550 | -1148.659311 | 0.6566 |
|                                   | 2a_sy_tr_4      | -1148.926753 | -1148.658092 | 0.1803 |
|                                   | 2a_sy_tr_5      | -1148.918379 | -1148.648867 | 0.0000 |
|                                   | 2a_sy_tr_5_r    | -1148.920812 | -1148.651445 | 0.0002 |
|                                   | 2a_sy_tr_6      | -1148.923445 | -1148.654919 | 0.0062 |
|                                   | 2a_sy_tr_7      | -1148.919293 | -1148.649629 | 0.0000 |
|                                   | 2a_sy_tr_8      | -1148.922771 | -1148.653554 | 0.0015 |
|                                   | 2a_sy_tr_9      | -1148.919112 | -1148.648765 | 0.0000 |
|                                   | 2a_sy_tr_10     | -1148.913664 | -1148.645527 | 0.0000 |
|                                   | weighted:       |              | -1148.658703 |        |
| <i>trans</i> -TS2 ( <b>2a+7</b> ) | 2a_sy_tr_1_ts2  | -1148.913683 | -1148.647659 | 0.0668 |
|                                   | 2a_sy_tr_2_ts2  | -1148.917918 | -1148.650050 | 0.8422 |
|                                   | 2a_sy_tr_5_ts2  | -1148.911014 | -1148.644646 | 0.0027 |
|                                   | 2a_sy_tr_6_ts2  | -1148.914344 | -1148.647922 | 0.0883 |
|                                   | weighted:       |              | -1148.649687 |        |

|                                       |                 |             |             |        |
|---------------------------------------|-----------------|-------------|-------------|--------|
| <i>trans</i> -product ( <b>2a+7</b> ) | 2a_sy_tr_prod_1 | -671.042180 | -670.845110 | 0.7933 |
|                                       | 2a_sy_tr_prod_3 | -671.041286 | -670.843842 | 0.2067 |
|                                       | weighted:       |             | -670.844848 |        |

|                            |        |                      |
|----------------------------|--------|----------------------|
| $G_{trans}^{\ddagger}$     | 82.4   | $\text{kJ mol}^{-1}$ |
| $G_{IM, trans}^0$          | 19.2   | $\text{kJ mol}^{-1}$ |
| $G_{cp, trans}^{\ddagger}$ | 42.9   | $\text{kJ mol}^{-1}$ |
| $G_{trans}^0$              | -161.4 | $\text{kJ mol}^{-1}$ |

|                                 |                    |              |              |        |
|---------------------------------|--------------------|--------------|--------------|--------|
| <i>cis</i> -TS1 ( <b>2a+7</b> ) | 2a_sy_c_1_ts1      | -1148.899474 | -1148.634535 | 0.5156 |
|                                 | 2a_sy_c_1_ts1_rot1 | -1148.899949 | -1148.634444 | 0.4681 |
|                                 | 2a_sy_c_2_ts1      | -1148.893432 | -1148.627928 | 0.0005 |
|                                 | 2a_sy_c_3_ts1      | -1148.896106 | -1148.630073 | 0.0046 |
|                                 | 2a_sy_c_5_ts1      | -1148.894081 | -1148.629270 | 0.0019 |
|                                 | 2a_sy_c_6_ts1      | -1148.885578 | -1148.619405 | 0.0000 |
|                                 | 2a_sy_c_9_ts1      | -1148.894657 | -1148.630732 | 0.0091 |
|                                 | 2a_sy_c_10_ts1     | -1148.892092 | -1148.626848 | 0.0001 |
|                                 | weighted:          |              | -1148.634423 |        |

|                                |             |              |              |        |
|--------------------------------|-------------|--------------|--------------|--------|
| <i>cis</i> -IM ( <b>2a+7</b> ) | 2a_sy_c_1   | -1148.926606 | -1148.658355 | 0.1470 |
|                                | 2a_sy_c_1_r | -1148.923134 | -1148.655454 | 0.0068 |
|                                | 2a_sy_c_2   | -1148.921443 | -1148.653821 | 0.0012 |
|                                | 2a_sy_c_2_r | -1148.920176 | -1148.650347 | 0.0000 |
|                                | 2a_sy_c_3   | -1148.925093 | -1148.656159 | 0.0143 |
|                                | 2a_sy_c_3_r | -1148.917886 | -1148.647668 | 0.0000 |
|                                | 2a_sy_c_4   | -1148.927681 | -1148.658100 | 0.1121 |
|                                | 2a_sy_c_5   | -1148.925303 | -1148.656483 | 0.0202 |
|                                | 2a_sy_c_5_r | -1148.924186 | -1148.656302 | 0.0167 |
|                                | 2a_sy_c_6   | -1148.917717 | -1148.648975 | 0.0000 |
|                                | 2a_sy_c_9   | -1148.924544 | -1148.656358 | 0.0177 |
|                                | 2a_sy_c_10  | -1148.926757 | -1148.658008 | 0.1018 |
|                                | 2a_sy_c_11  | -1148.926589 | -1148.659620 | 0.5622 |
| weighted:                      |             | -1148.658838 |              |        |

|                                 |               |              |              |        |
|---------------------------------|---------------|--------------|--------------|--------|
| <i>cis</i> -TS2 ( <b>2a+7</b> ) | 2a_sy_c_1_ts2 | -1148.908680 | -1148.642389 | 0.4933 |
|                                 | 2a_sy_c_2_ts2 | -1148.905568 | -1148.638389 | 0.0071 |
|                                 | 2a_sy_c_3_ts2 | -1148.905715 | -1148.638639 | 0.0093 |
|                                 | 2a_sy_c_5_ts2 | -1148.908244 | -1148.642383 | 0.4904 |
|                                 | weighted:     |              | -1148.642323 |        |

|                                     |                |             |             |        |
|-------------------------------------|----------------|-------------|-------------|--------|
| <i>cis</i> -product ( <b>2a+7</b> ) | 2a_sy_c_prod_1 | -671.036095 | -670.838777 | 0.6317 |
|                                     | 2a_sy_c_prod_2 | -671.035810 | -670.838268 | 0.3683 |
|                                     | weighted:      |             | -670.838590 |        |

|                          |      |                      |
|--------------------------|------|----------------------|
| $G_{cis}^{\ddagger}$     | 82.9 | $\text{kJ mol}^{-1}$ |
| $G_{IM, cis}^0$          | 18.8 | $\text{kJ mol}^{-1}$ |
| $G_{cp, cis}^{\ddagger}$ | 62.2 | $\text{kJ mol}^{-1}$ |

$G_{cis}^0$  -145.0 kJ mol<sup>-1</sup>

| <b>2b + 7</b>                         |                 |                          |              |                      |
|---------------------------------------|-----------------|--------------------------|--------------|----------------------|
| <b>2b</b>                             | 2b              | -347.855437              | -347.731078  |                      |
| <i>trans</i> -TS1 ( <b>2b+7</b> )     | 2b_sy_tr_1_ts1  | -1188.194723             | -1187.903549 | 0.1179               |
|                                       | 2b_sy_tr_2_ts1  | -1188.196708             | -1187.905447 | 0.8820               |
|                                       | 2b_sy_tr_4_ts1  | -1188.190142             | -1187.897392 | 0.0002               |
|                                       | weighted:       |                          | -1187.905222 |                      |
| <i>trans</i> -IM ( <b>2b+7</b> )      | 2b_sy_tr_1      | -1188.219901             | -1187.924348 | 0.4926               |
|                                       | 2b_sy_tr_1_r    | -1188.215150             | -1187.919531 | 0.0030               |
|                                       | 2b_sy_tr_2      | -1188.217872             | -1187.923122 | 0.1343               |
|                                       | 2b_sy_tr_2_r    | -1188.219526             | -1187.924078 | 0.3700               |
|                                       | 2b_sy_tr_3      | -1188.213041             | -1187.916449 | 0.0001               |
|                                       | 2b_sy_tr_3_r    | -1188.210536             | -1187.913962 | 0.0000               |
|                                       | 2b_sy_tr_4      | -1188.209724             | -1187.913235 | 0.0000               |
|                                       | weighted:       |                          | -1187.924068 |                      |
| <i>trans</i> -TS2 ( <b>2b+7</b> )     | 2b_sy_tr_2_ts2  | -1188.213398             | -1187.919527 | 1.0000               |
|                                       | weighted:       |                          | -1187.919527 |                      |
| <i>trans</i> -product ( <b>2b+7</b> ) | 2b_sy_tr_prod_1 | -710.338002              | -710.114710  | 0.2676               |
|                                       | 2b_sy_tr_prod_2 | -710.338504              | -710.115660  | 0.7324               |
|                                       | weighted:       |                          | -710.115406  |                      |
|                                       |                 | $G_{trans}^\ddagger$     | 92.4         | kJ mol <sup>-1</sup> |
|                                       |                 | $G_{IM, trans}^0$        | 42.9         | kJ mol <sup>-1</sup> |
|                                       |                 | $G_{cp, trans}^\ddagger$ | 54.8         | kJ mol <sup>-1</sup> |
|                                       |                 | $G_{trans}^0$            | -151.3       | kJ mol <sup>-1</sup> |
| <i>cis</i> -TS1 ( <b>2b+7</b> )       | 2b_sy_c_1_ts1   | -1188.197351             | -1187.906244 | 0.2079               |
|                                       | 2b_sy_c_3_ts1   | -1188.192173             | -1187.900576 | 0.0005               |
|                                       | 2b_sy_c_4_ts1   | -1188.199021             | -1187.906695 | 0.3352               |
|                                       | 2b_sy_c_5_ts1   | -1188.191938             | -1187.900444 | 0.0004               |
|                                       | 2b_sy_c_6_ts1   | -1188.199549             | -1187.906976 | 0.4516               |
|                                       | 2b_sy_c_8_ts1   | -1188.191256             | -1187.898463 | 0.0001               |
|                                       | 2b_sy_c_9_ts1   | -1188.188341             | -1187.897608 | 0.0000               |
|                                       | 2b_sy_c_10_ts1  | -1188.195169             | -1187.902587 | 0.0043               |
|                                       | weighted:       |                          | -1187.906704 |                      |
| <i>cis</i> -IM ( <b>2b+7</b> )        | 2b_sy_c_1       | -1188.221650             | -1187.925979 | 0.3991               |
|                                       | 2b_sy_c_2       | -1188.221040             | -1187.925393 | 0.2144               |
|                                       | 2b_sy_c_3       | -1188.216998             | -1187.921815 | 0.0048               |
|                                       | 2b_sy_c_4       | -1188.219190             | -1187.924424 | 0.0767               |
|                                       | 2b_sy_c_5       | -1188.221138             | -1187.925413 | 0.2192               |
|                                       | 2b_sy_c_5_r     | -1188.213091             | -1187.917522 | 0.0001               |

|                                     |                |              |              |        |
|-------------------------------------|----------------|--------------|--------------|--------|
|                                     | 2b_sy_c_6      | -1188.218403 | -1187.924305 | 0.0677 |
|                                     | 2b_sy_c_8      | -1188.218087 | -1187.921415 | 0.0032 |
|                                     | 2b_sy_c_9      | -1188.216787 | -1187.921593 | 0.0038 |
|                                     | 2b_sy_c_10     | -1188.216412 | -1187.921139 | 0.0024 |
|                                     | 2b_sy_c_11     | -1188.216023 | -1187.921224 | 0.0026 |
|                                     | 2b_sy_c_12     | -1188.216527 | -1187.922003 | 0.0059 |
|                                     | 2b_sy_c_13     | -1188.214075 | -1187.918434 | 0.0001 |
|                                     | weighted:      |              | -1187.925397 |        |
| <i>cis</i> -TS2 ( <b>2b+7</b> )     | 2b_sy_c_3_ts2  | -1188.204776 | -1187.912026 | 0.9947 |
|                                     | 2b_sy_c_5_ts2  | -1188.200729 | -1187.907087 | 0.0053 |
|                                     | weighted:      |              | -1187.912000 |        |
| <i>cis</i> -product ( <b>2b+7</b> ) | 2b_sy_c_prod_1 | -710.334261  | -710.111105  | 0.5710 |
|                                     | 2b_sy_c_prod_2 | -710.334347  | -710.110835  | 0.4290 |
|                                     | weighted:      |              | -710.110989  |        |

|                          |        |                      |
|--------------------------|--------|----------------------|
| $G_{cis}^{\ddagger}$     | 88.5   | $\text{kJ mol}^{-1}$ |
| $G_{IM, cis}^0$          | 39.4   | $\text{kJ mol}^{-1}$ |
| $G_{cp, cis}^{\ddagger}$ | 74.6   | $\text{kJ mol}^{-1}$ |
| $G_{cis}^0$              | -139.7 | $\text{kJ mol}^{-1}$ |

| <b>2c + 7</b>                     |                     |                    |                    |              |
|-----------------------------------|---------------------|--------------------|--------------------|--------------|
| <b>2c</b>                         | <b>2c</b>           | <b>-347.858736</b> | <b>-347.734627</b> |              |
| <i>trans</i> -TS1 ( <b>2c+7</b> ) | 2c_sy_tr_1_ts1      | -1188.193159       | -1187.900369       | 0.0053       |
|                                   | 2c_sy_tr_2_ts1      | -1188.196459       | -1187.904146       | 0.2916       |
|                                   | 2c_sy_tr_2_ts1_rot1 | -1188.197381       | -1187.904938       | 0.6750       |
|                                   | 2c_sy_tr_3_ts1      | -1188.194255       | -1187.901401       | 0.0159       |
|                                   | 2c_sy_tr_4_ts1      | -1188.186984       | -1187.894064       | 0.0000       |
|                                   | 2c_sy_tr_5_ts1      | -1188.194165       | -1187.901153       | 0.0122       |
|                                   | weighted:           |                    |                    | -1187.904581 |
| <i>trans</i> -IM ( <b>2c+7</b> )  | 2c_sy_tr_1          | -1188.223312       | -1187.926841       | 0.7749       |
|                                   | 2c_sy_tr_1_r        | -1188.218497       | -1187.921981       | 0.0045       |
|                                   | 2c_sy_tr_2          | -1188.222035       | -1187.925091       | 0.1212       |
|                                   | 2c_sy_tr_2_r        | -1188.219126       | -1187.922576       | 0.0084       |
|                                   | 2c_sy_tr_3          | -1188.219683       | -1187.924555       | 0.0686       |
|                                   | 2c_sy_tr_3_r        | -1188.217718       | -1187.921957       | 0.0044       |
|                                   | 2c_sy_tr_4          | -1188.215194       | -1187.917228       | 0.0000       |
|                                   | 2c_sy_tr_4_r        | -1188.211473       | -1187.913923       | 0.0000       |
|                                   | 2c_sy_tr_5          | -1188.218650       | -1187.922762       | 0.0103       |
|                                   | 2c_sy_tr_5_r        | -1188.218692       | -1187.922493       | 0.0077       |
|                                   | weighted:           |                    |                    | -1187.926317 |
| <i>trans</i> -TS2 ( <b>2c+7</b> ) | 2c_sy_tr_1_ts2      | -1188.209239       | -1187.915302       | 0.0641       |
|                                   | 2c_sy_tr_2_ts2      | -1188.212485       | -1187.917664       | 0.7841       |



|                                       |                                   |              |              |                      |
|---------------------------------------|-----------------------------------|--------------|--------------|----------------------|
|                                       | 2c_sy_tr_3_ts2                    | -1188.209102 | -1187.916115 | 0.1518               |
|                                       | weighted:                         |              | -1187.917277 |                      |
| <i>trans</i> -product ( <b>2c+7</b> ) | 2c_sy_tr_prod_1                   | -710.339129  | -710.116305  | 0.9043               |
|                                       | 2c_sy_tr_prod_2                   | -710.337435  | -710.114186  | 0.0957               |
|                                       | weighted:                         |              | -710.116102  |                      |
|                                       | $G_{\text{trans}}^{\ddagger}$     |              | 103.4        | $\text{kJ mol}^{-1}$ |
|                                       | $G_{\text{IM, trans}}^0$          |              | 46.3         | $\text{kJ mol}^{-1}$ |
|                                       | $G_{\text{cp, trans}}^{\ddagger}$ |              | 70.0         | $\text{kJ mol}^{-1}$ |
|                                       | $G_{\text{trans}}^0$              |              | -143.9       | $\text{kJ mol}^{-1}$ |
| <i>cis</i> -TS1 ( <b>2c+7</b> )       | 2c_sy_c_1_ts1                     | -1188.197325 | -1187.905200 | 0.9687               |
|                                       | 2c_sy_c_2_ts1                     | -1188.190157 | -1187.898392 | 0.0007               |
|                                       | 2c_sy_c_3_ts1                     | -1188.194357 | -1187.901557 | 0.0204               |
|                                       | 2c_sy_c_4_ts1                     | -1188.191200 | -1187.898661 | 0.0009               |
|                                       | 2c_sy_c_5_ts1                     | -1188.192721 | -1187.900656 | 0.0078               |
|                                       | 2c_sy_c_6_ts1                     | -1188.181433 | -1187.887990 | 0.0000               |
|                                       | 2c_sy_c_7_ts1                     | -1188.190960 | -1187.897350 | 0.0002               |
|                                       | 2c_sy_c_8_ts1                     | -1188.191867 | -1187.898887 | 0.0012               |
|                                       | weighted:                         |              | -1187.905070 |                      |
| <i>cis</i> -IM ( <b>2c+7</b> )        | 2c_sy_c_1                         | -1188.221464 | -1187.925398 | 0.3036               |
|                                       | 2c_sy_c_1_r                       | -1188.215464 | -1187.919253 | 0.0004               |
|                                       | 2c_sy_c_2                         | -1188.222327 | -1187.925863 | 0.4970               |
|                                       | 2c_sy_c_2_r                       | -1188.216957 | -1187.920097 | 0.0011               |
|                                       | 2c_sy_c_3                         | -1188.219690 | -1187.923455 | 0.0387               |
|                                       | 2c_sy_c_3_r                       | -1188.213699 | -1187.917754 | 0.0001               |
|                                       | 2c_sy_c_4                         | -1188.221039 | -1187.924680 | 0.1418               |
|                                       | 2c_sy_c_4_r                       | -1188.215831 | -1187.919912 | 0.0009               |
|                                       | 2c_sy_c_5                         | -1188.218014 | -1187.921647 | 0.0057               |
|                                       | 2c_sy_c_6                         | -1188.211850 | -1187.914347 | 0.0000               |
|                                       | 2c_sy_c_7                         | -1188.213307 | -1187.917057 | 0.0000               |
|                                       | 2c_sy_c_8                         | -1188.219059 | -1187.922248 | 0.0108               |
|                                       | weighted:                         |              | -1187.925383 |                      |
| <i>cis</i> -TS2 ( <b>2c+7</b> )       | 2c_sy_c_1_ts2                     | -1188.206877 | -1187.912240 | 0.3551               |
|                                       | 2c_sy_c_2_ts2                     | -1188.206186 | -1187.912588 | 0.5136               |
|                                       | 2c_sy_c_3_ts2                     | -1188.204986 | -1187.911301 | 0.1313               |
|                                       | weighted:                         |              | -1187.912295 |                      |
| <i>cis</i> -product ( <b>2c+7</b> )   | 2c_sy_c_prod_1                    | -710.335667  | -710.112280  | 0.7692               |
|                                       | 2c_sy_c_prod_2                    | -710.334844  | -710.111144  | 0.2308               |
|                                       | weighted:                         |              | -710.112018  |                      |
|                                       | $G_{\text{cis}}^{\ddagger}$       |              | 102.1        | $\text{kJ mol}^{-1}$ |
|                                       | $G_{\text{IM, cis}}^0$            |              | 48.7         | $\text{kJ mol}^{-1}$ |

|                          |        |                      |
|--------------------------|--------|----------------------|
| $G_{cp, cis}^{\ddagger}$ | 83.1   | $\text{kJ mol}^{-1}$ |
| $G_{cis}^0$              | -133.1 | $\text{kJ mol}^{-1}$ |

| <b>3 + 7</b>            |                    |              |              |        |
|-------------------------|--------------------|--------------|--------------|--------|
| <b>3</b>                | 3_1                | -347.841829  | -347.717170  | 0.5769 |
|                         | 3_2                | -347.842288  | -347.716448  | 0.2683 |
|                         | 3_3                | -347.841624  | -347.715929  | 0.1548 |
|                         | weighted:          |              | -347.716784  |        |
| <i>trans</i> -TS1 (3+7) | 3_sy_tr_1_ts1      | -1188.184029 | -1187.889922 | 0.0027 |
|                         | 3_sy_tr_2_ts1      | -1188.183718 | -1187.891680 | 0.0176 |
|                         | 3_sy_tr_2_ts1_rot1 | -1188.189309 | -1187.895467 | 0.9766 |
|                         | 3_sy_tr_3_ts1      | -1188.149303 | -1187.859282 | 0.0000 |
|                         | 3_sy_tr_4_ts1      | -1188.147624 | -1187.857305 | 0.0000 |
|                         | 3_sy_tr_28_ts1     | -1188.184841 | -1187.890034 | 0.0031 |
|                         | weighted:          |              | -1187.895369 |        |
| <i>trans</i> -IM (3+7)  | 3_sy_tr_1          | -1188.207326 | -1187.911047 | 0.0001 |
|                         | 3_sy_tr_1_r        | -1188.209881 | -1187.913528 | 0.0009 |
|                         | 3_sy_tr_2          | -1188.208322 | -1187.913153 | 0.0006 |
|                         | 3_sy_tr_3          | -1188.216597 | -1187.919563 | 0.5474 |
|                         | 3_sy_tr_3_r        | -1188.211486 | -1187.915408 | 0.0067 |
|                         | 3_sy_tr_4          | -1188.210041 | -1187.914807 | 0.0035 |
|                         | 3_sy_tr_5          | -1188.210590 | -1187.913495 | 0.0009 |
|                         | 3_sy_tr_5_r        | -1188.209506 | -1187.913446 | 0.0008 |
|                         | 3_sy_tr_6          | -1188.212937 | -1187.917412 | 0.0559 |
|                         | 3_sy_tr_7          | -1188.212463 | -1187.915778 | 0.0099 |
|                         | 3_sy_tr_8          | -1188.212677 | -1187.916733 | 0.0272 |
|                         | 3_sy_tr_9          | -1188.210529 | -1187.912761 | 0.0004 |
|                         | 3_sy_tr_10         | -1188.209132 | -1187.912577 | 0.0003 |
|                         | 3_sy_tr_11         | -1188.209338 | -1187.913773 | 0.0012 |
|                         | 3_sy_tr_12         | -1188.205200 | -1187.906442 | 0.0000 |
|                         | 3_sy_tr_13         | -1188.209593 | -1187.911592 | 0.0001 |
|                         | 3_sy_tr_14         | -1188.210222 | -1187.912824 | 0.0004 |
|                         | 3_sy_tr_15         | -1188.205831 | -1187.908595 | 0.0000 |
|                         | 3_sy_tr_16         | -1188.203612 | -1187.906745 | 0.0000 |
|                         | 3_sy_tr_17         | -1188.213285 | -1187.916867 | 0.0314 |
|                         | 3_sy_tr_18         | -1188.209489 | -1187.913496 | 0.0009 |
|                         | 3_sy_tr_19         | -1188.206143 | -1187.909305 | 0.0000 |
|                         | 3_sy_tr_20         | -1188.204846 | -1187.908400 | 0.0000 |
|                         | 3_sy_tr_21         | -1188.202158 | -1187.904658 | 0.0000 |
|                         | 3_sy_tr_22         | -1188.204891 | -1187.908924 | 0.0000 |
|                         | 3_sy_tr_23         | -1188.211905 | -1187.916194 | 0.0154 |
|                         | 3_sy_tr_24         | -1188.207351 | -1187.909305 | 0.0000 |
|                         | 3_sy_tr_25         | -1188.209144 | -1187.912435 | 0.0003 |
| 3_sy_tr_26              | -1188.205010       | -1187.908473 | 0.0000       |        |
| 3_sy_tr_28              | -1188.215766       | -1187.918948 | 0.2851       |        |

|                             |                |              |              |        |
|-----------------------------|----------------|--------------|--------------|--------|
|                             | 3_sy_tr_30     | -1188.203749 | -1187.908468 | 0.0000 |
|                             | 3_sy_tr_31     | -1188.201950 | -1187.904686 | 0.0000 |
|                             | 3_sy_tr_32     | -1188.204204 | -1187.906718 | 0.0000 |
|                             | 3_sy_tr_33     | -1188.213534 | -1187.915842 | 0.0106 |
|                             | weighted:      |              | -1187.918889 |        |
| <i>trans</i> -TS2 (3+7)     | 3_sy_tr_1_ts2  | -1188.201534 | -1187.907174 | 0.1258 |
|                             | 3_sy_tr_3_ts2  | -1188.189189 | -1187.896800 | 0.0000 |
|                             | 3_sy_tr_4_ts2  | -1188.174825 | -1187.884660 | 0.0000 |
|                             | 3_sy_tr_5_ts2  | -1188.204024 | -1187.909002 | 0.8742 |
|                             | weighted:      |              | -1187.908772 |        |
| <i>trans</i> -product (3+7) | 3_sy_tr_prod_1 | -710.333932  | -710.108814  | 0.2154 |
|                             | 3_sy_tr_prod_3 | -710.328888  | -710.104027  | 0.0013 |
|                             | 3_sy_tr_prod_4 | -710.335303  | -710.109820  | 0.6258 |
|                             | 3_sy_tr_prod_5 | -710.331802  | -710.107889  | 0.0808 |
|                             | 3_sy_tr_prod_6 | -710.325079  | -710.102268  | 0.0002 |
|                             | 3_sy_tr_prod_7 | -710.333263  | -710.107837  | 0.0765 |
|                             | weighted:      |              | -710.109286  |        |

|                            |        |                      |
|----------------------------|--------|----------------------|
| $G_{trans}^{\ddagger}$     | 80.7   | $\text{kJ mol}^{-1}$ |
| $G_{IM, trans}^0$          | 19.0   | $\text{kJ mol}^{-1}$ |
| $G_{cp, trans}^{\ddagger}$ | 45.5   | $\text{kJ mol}^{-1}$ |
| $G_{trans}^0$              | -172.8 | $\text{kJ mol}^{-1}$ |

|                       |               |              |              |        |
|-----------------------|---------------|--------------|--------------|--------|
| <i>cis</i> -TS1 (3+7) | 3_sy_c_1_ts1  | -1188.185890 | -1187.893970 | 0.6639 |
|                       | 3_sy_c_2_ts1  | -1188.186643 | -1187.892858 | 0.2043 |
|                       | 3_sy_c_3_ts1  | -1188.180471 | -1187.887218 | 0.0005 |
|                       | 3_sy_c_4_ts1  | -1188.177862 | -1187.885701 | 0.0001 |
|                       | 3_sy_c_5_ts1  | -1188.183749 | -1187.891186 | 0.0347 |
|                       | 3_sy_c_6_ts1  | -1188.149506 | -1187.859207 | 0.0000 |
|                       | 3_sy_c_7_ts1  | -1188.182986 | -1187.889490 | 0.0057 |
|                       | 3_sy_c_9_ts1  | -1188.182786 | -1187.890041 | 0.0103 |
|                       | 3_sy_c_10_ts1 | -1188.184416 | -1187.891969 | 0.0796 |
|                       | 3_sy_c_11_ts1 | -1188.174490 | -1187.881602 | 0.0000 |
|                       | 3_sy_c_14_ts1 | -1188.180926 | -1187.887748 | 0.0009 |
|                       | 3_sy_c_15_ts1 | -1188.144571 | -1187.853562 | 0.0000 |
|                       | 3_sy_c_16_ts1 | -1188.145192 | -1187.855855 | 0.0000 |
|                       | 3_sy_c_18_ts1 | -1188.144341 | -1187.853174 | 0.0000 |
|                       | weighted:     |              | -1187.893411 |        |
| <i>cis</i> -IM (3+7)  | 3_sy_c_1      | -1188.219004 | -1187.921972 | 0.6639 |
|                       | 3_sy_c_1_r    | -1188.209494 | -1187.912810 | 0.0000 |
|                       | 3_sy_c_2      | -1188.214634 | -1187.917953 | 0.0094 |
|                       | 3_sy_c_2_r    | -1188.206945 | -1187.909878 | 0.0000 |
|                       | 3_sy_c_3      | -1188.213514 | -1187.915601 | 0.0008 |
|                       | 3_sy_c_3_r    | -1188.203491 | -1187.905974 | 0.0000 |

|                           |                          |              |              |                      |
|---------------------------|--------------------------|--------------|--------------|----------------------|
|                           | 3_sy_c_4                 | -1188.209052 | -1187.912496 | 0.0000               |
|                           | 3_sy_c_4_r               | -1188.199929 | -1187.902293 | 0.0000               |
|                           | 3_sy_c_5                 | -1188.212430 | -1187.914097 | 0.0002               |
|                           | 3_sy_c_5_r               | -1188.202315 | -1187.906217 | 0.0000               |
|                           | 3_sy_c_6                 | -1188.212155 | -1187.916524 | 0.0021               |
|                           | 3_sy_c_7                 | -1188.209216 | -1187.912247 | 0.0000               |
|                           | 3_sy_c_8                 | -1188.218091 | -1187.920458 | 0.1334               |
|                           | 3_sy_c_9                 | -1188.210105 | -1187.913571 | 0.0001               |
|                           | 3_sy_c_10                | -1188.213830 | -1187.917055 | 0.0036               |
|                           | 3_sy_c_11                | -1188.203218 | -1187.906152 | 0.0000               |
|                           | 3_sy_c_12                | -1188.215197 | -1187.917715 | 0.0073               |
|                           | 3_sy_c_13                | -1188.214574 | -1187.918247 | 0.0128               |
|                           | 3_sy_c_14                | -1188.211194 | -1187.915060 | 0.0004               |
|                           | 3_sy_c_15                | -1188.211851 | -1187.916059 | 0.0013               |
|                           | 3_sy_c_16                | -1188.211006 | -1187.914012 | 0.0001               |
|                           | 3_sy_c_17                | -1188.204376 | -1187.908324 | 0.0000               |
|                           | 3_sy_c_18                | -1188.218447 | -1187.920655 | 0.1644               |
|                           | 3_sy_c_19                | -1188.210132 | -1187.914059 | 0.0002               |
|                           | 3_sy_c_20                | -1188.208113 | -1187.912387 | 0.0000               |
|                           | weighted:                |              | -1187.921387 |                      |
| <i>cis</i> -TS2 (3+7)     | 3_sy_c_1_ts2             | -1188.198829 | -1187.904510 | 0.9969               |
|                           | 3_sy_c_2_ts2             | -1188.191007 | -1187.896588 | 0.0002               |
|                           | 3_sy_c_3_ts2             | -1188.194080 | -1187.898992 | 0.0029               |
|                           | 3_sy_c_4_ts2             | -1188.187454 | -1187.891773 | 0.0000               |
|                           | weighted:                |              | -1187.904493 |                      |
| <i>cis</i> -product (3+7) | 3_sy_c_prod_1            | -710.326302  | -710.101515  | 0.3846               |
|                           | 3_sy_c_prod_2            | -710.325325  | -710.101286  | 0.3019               |
|                           | 3_sy_c_prod_3            | -710.321169  | -710.095727  | 0.0008               |
|                           | 3_sy_c_prod_4            | -710.327045  | -710.101123  | 0.2538               |
|                           | 3_sy_c_prod_5            | -710.325137  | -710.099745  | 0.0589               |
|                           | weighted:                |              | -710.101237  |                      |
|                           | $G_{cis}^{\ddagger}$     | 85.8         |              | $\text{kJ mol}^{-1}$ |
|                           | $G_{IM, cis}^0$          | 12.4         |              | $\text{kJ mol}^{-1}$ |
|                           | $G_{cp, cis}^{\ddagger}$ | 56.7         |              | $\text{kJ mol}^{-1}$ |
|                           | $G_{cis}^0$              | -151.7       |              | $\text{kJ mol}^{-1}$ |
| <b>4a + 7</b>             |                          |              |              |                      |
| <b>4a</b>                 | 4a                       | -305.169162  | -305.121481  |                      |
| <i>trans</i> -TS1 (4a+7)  | 4a_tr_sy_1_ts1           | -1145.513164 | -1145.299771 | 0.0260               |
|                           | 4a_tr_sy_1_ts1_rot1      | -1145.517009 | -1145.303189 | 0.9733               |
|                           | 4a_tr_sy_2_ts1           | -1145.509975 | -1145.295422 | 0.0003               |
|                           | 4a_tr_sy_3_ts1           | -1145.510896 | -1145.296046 | 0.0005               |
|                           | weighted:                |              | -1145.303094 |                      |

|                                       |                 |                            |              |                      |
|---------------------------------------|-----------------|----------------------------|--------------|----------------------|
| <i>trans</i> -IM ( <b>4a+7</b> )      | 4a_tr_sy_1      | -1145.539079               | -1145.321585 | 0.0761               |
|                                       | 4a_tr_sy_1_r    | -1145.538032               | -1145.322058 | 0.1257               |
|                                       | 4a_tr_sy_2      | -1145.532897               | -1145.315260 | 0.0001               |
|                                       | 4a_tr_sy_2_r    | -1145.534954               | -1145.317944 | 0.0016               |
|                                       | 4a_tr_sy_3      | -1145.538633               | -1145.322024 | 0.1213               |
|                                       | 4a_tr_sy_3_r    | -1145.540568               | -1145.323644 | 0.6752               |
|                                       | weighted:       |                            | -1145.323081 |                      |
| <i>trans</i> -TS2 ( <b>4a+7</b> )     | 4a_tr_sy_1_ts2  | -1145.528959               | -1145.314181 | 0.1338               |
|                                       | 4a_tr_sy_2_ts2  | -1145.526993               | -1145.313160 | 0.0453               |
|                                       | 4a_tr_sy_3_ts2  | -1145.530449               | -1145.315892 | 0.8208               |
|                                       | weighted:       |                            | -1145.315539 |                      |
| <i>trans</i> -product ( <b>4a+7</b> ) | 4a_sy_tr_prod_1 | -667.656198                | -667.508900  | 1.0000               |
|                                       | weighted:       |                            | -667.508900  |                      |
|                                       |                 | $G_{trans}^{\ddagger}$     | 72.8         | $\text{kJ mol}^{-1}$ |
|                                       |                 | $G_{IM, trans}^0$          | 20.3         | $\text{kJ mol}^{-1}$ |
|                                       |                 | $G_{cp, trans}^{\ddagger}$ | 40.1         | $\text{kJ mol}^{-1}$ |
|                                       |                 | $G_{trans}^0$              | -159.5       | $\text{kJ mol}^{-1}$ |
| <i>cis</i> -TS1 ( <b>4a+7</b> )       | 4a_c_sy_1_ts1   | -1145.510167               | -1145.295519 | 0.0030               |
|                                       | 4a_c_sy_2_ts1   | -1145.510667               | -1145.295834 | 0.0042               |
|                                       | 4a_c_sy_3_ts1   | -1145.513676               | -1145.300727 | 0.7511               |
|                                       | 4a_c_sy_4_ts1   | -1145.513067               | -1145.299588 | 0.2244               |
|                                       | 4a_c_sy_5_ts1   | -1145.509046               | -1145.294380 | 0.0009               |
|                                       | 4a_c_sy_6_ts1   | -1145.511051               | -1145.297118 | 0.0164               |
|                                       | weighted:       |                            | -1145.300371 |                      |
| <i>cis</i> -IM ( <b>4a+7</b> )        | 4a_c_sy_1       | -1145.534119               | -1145.316808 | 0.0001               |
|                                       | 4a_c_sy_1_r     | -1145.533225               | -1145.315769 | 0.0000               |
|                                       | 4a_c_sy_2       | -1145.541329               | -1145.323806 | 0.2088               |
|                                       | 4a_c_sy_2_r     | -1145.536344               | -1145.318996 | 0.0013               |
|                                       | 4a_c_sy_3       | -1145.541560               | -1145.323898 | 0.2301               |
|                                       | 4a_c_sy_4       | -1145.540016               | -1145.323299 | 0.1220               |
|                                       | 4a_c_sy_5       | -1145.536186               | -1145.319337 | 0.0018               |
|                                       | 4a_c_sy_6       | -1145.541383               | -1145.324500 | 0.4358               |
| weighted:                             |                 | -1145.324052               |              |                      |
| <i>cis</i> -TS2 ( <b>4a+7</b> )       | 4a_c_sy_1_ts2   | -1145.523943               | -1145.307249 | 0.0963               |
|                                       | 4a_c_sy_2_ts2   | -1145.525706               | -1145.309361 | 0.9037               |
|                                       | weighted:       |                            | -1145.309158 |                      |
| <i>cis</i> -product ( <b>4a+7</b> )   | 4a_sy_c_prod_1  | -667.654360                | -667.507922  | 1.0000               |
|                                       | weighted:       |                            | -667.507922  |                      |

|                          |        |                      |
|--------------------------|--------|----------------------|
| $G_{cis}^{\ddagger}$     | 79.9   | $\text{kJ mol}^{-1}$ |
| $G_{IM, cis}^0$          | 17.7   | $\text{kJ mol}^{-1}$ |
| $G_{cp, cis}^{\ddagger}$ | 56.8   | $\text{kJ mol}^{-1}$ |
| $G_{cis}^0$              | -156.9 | $\text{kJ mol}^{-1}$ |

| <b>4b + 7</b>                         |                  |              |              |              |
|---------------------------------------|------------------|--------------|--------------|--------------|
| <b>4b</b>                             | 4b               | -344.460189  | -344.386215  |              |
| TS1 ( <b>4b+7</b> )                   | 4b_sy_1_ts1      | -1184.805843 | -1184.565470 | 0.0318       |
|                                       | 4b_sy_2_ts1      | -1184.804409 | -1184.564051 | 0.0071       |
|                                       | 4b_sy_3_ts1      | -1184.804612 | -1184.565061 | 0.0206       |
|                                       | 4b_sy_4_ts1      | -1184.802892 | -1184.561105 | 0.0003       |
|                                       | 4b_sy_5_ts1      | -1184.809791 | -1184.567745 | 0.3546       |
|                                       | 4b_sy_5_ts1_rot1 | -1184.809658 | -1184.567323 | 0.2267       |
|                                       | 4b_sy_7_ts1      | -1184.806622 | -1184.567714 | 0.3432       |
|                                       | 4b_sy_8_ts1      | -1184.806199 | -1184.564178 | 0.0081       |
|                                       | 4b_sy_9_ts1      | -1184.807422 | -1184.564135 | 0.0077       |
|                                       |                  | weighted:    |              | -1184.567427 |
| IM ( <b>4b+7</b> )                    | 4b_sy_1          | -1184.836314 | -1184.591825 | 0.0050       |
|                                       | 4b_sy_1_r        | -1184.835794 | -1184.593051 | 0.0185       |
|                                       | 4b_sy_2          | -1184.837004 | -1184.591934 | 0.0057       |
|                                       | 4b_sy_2_r        | -1184.833907 | -1184.589561 | 0.0005       |
|                                       | 4b_sy_3          | -1184.841202 | -1184.596529 | 0.7380       |
|                                       | 4b_sy_3_r        | -1184.835577 | -1184.593157 | 0.0207       |
|                                       | 4b_sy_5          | -1184.838755 | -1184.595005 | 0.1467       |
|                                       | 4b_sy_5_r        | -1184.834609 | -1184.593099 | 0.0194       |
|                                       | 4b_sy_6          | -1184.833774 | -1184.588194 | 0.0001       |
|                                       | 4b_sy_7          | -1184.837589 | -1184.593869 | 0.0440       |
|                                       | 4b_sy_8          | -1184.833581 | -1184.587721 | 0.0001       |
|                                       | 4b_sy_9          | -1184.835301 | -1184.590555 | 0.0013       |
|                                       |                  | weighted:    |              | -1184.595925 |
| <i>cis</i> -TS2 ( <b>4b+7</b> )       | 4b_sy_c_1_ts2    | -1184.826011 | -1184.585731 | 1.0000       |
|                                       | weighted:        |              | -1184.585731 |              |
| <i>cis</i> -product ( <b>4b+7</b> )   | 4b_sy_c_prod_1   | -706.954852  | -706.781326  | 0.5723       |
|                                       | 4b_sy_c_prod_2   | -706.954584  | -706.781051  | 0.4277       |
|                                       | weighted:        |              | -706.781209  |              |
| <i>trans</i> -TS2 ( <b>4b+7</b> )     | 4b_sy_tr_2_ts2   | -1184.826876 | -1184.585464 | 0.2818       |
|                                       | 4b_sy_tr_3_ts2   | -1184.828172 | -1184.586346 | 0.7182       |
|                                       | weighted:        |              | -1184.586098 |              |
| <i>trans</i> -product ( <b>4b+7</b> ) | 4b_sy_tr_prod_1  | -706.952817  | -706.780289  | 0.7928       |
|                                       | 4b_sy_tr_prod_2  | -706.951166  | -706.779023  | 0.2072       |
|                                       | weighted:        |              | -706.780026  |              |

|                              |                 |                                 |              |                      |              |
|------------------------------|-----------------|---------------------------------|--------------|----------------------|--------------|
|                              |                 | $G^\ddagger$                    | 73.8         | $\text{kJ mol}^{-1}$ |              |
|                              |                 | $G_{\text{IM}}^0$               | -1.0         | $\text{kJ mol}^{-1}$ |              |
|                              |                 | $G_{\text{cp, cis}}^\ddagger$   | 25.8         | $\text{kJ mol}^{-1}$ |              |
|                              |                 | $G_{\text{cis}}^0$              | -179.3       | $\text{kJ mol}^{-1}$ |              |
|                              |                 | $G_{\text{cp, trans}}^\ddagger$ | 24.8         | $\text{kJ mol}^{-1}$ |              |
|                              |                 | $G_{\text{trans}}^0$            | -179.7       | $\text{kJ mol}^{-1}$ |              |
| <b>5a + 7</b>                |                 |                                 |              |                      |              |
| <b>5a</b>                    | <b>5a</b>       |                                 | -344.464791  | -344.389281          |              |
| <i>trans</i> -TS1 (5a+7)     | 5a_sy_tr_1_ts1  |                                 | -1184.806162 | -1184.564227         | 0.0045       |
|                              | 5a_sy_tr_2_ts1  |                                 | -1184.807952 | -1184.566052         | 0.0313       |
|                              | 5a_sy_tr_3_ts1  |                                 | -1184.802698 | -1184.560344         | 0.0001       |
|                              | 5a_sy_tr_4_ts1  |                                 | -1184.811847 | -1184.569146         | 0.8317       |
|                              | 5a_sy_tr_5_ts1  |                                 | -1184.809270 | -1184.567367         | 0.1262       |
|                              | 5a_sy_tr_6_ts1  |                                 | -1184.807480 | -1184.564358         | 0.0052       |
|                              | 5a_sy_tr_9_ts1  |                                 | -1184.803884 | -1184.561259         | 0.0002       |
|                              | 5a_sy_tr_10_ts1 |                                 | -1184.806991 | -1184.562699         | 0.0009       |
|                              |                 | weighted:                       |              |                      | -1184.568770 |
| <i>trans</i> -IM (5a+7)      | 5a_sy_tr_1      |                                 | -1184.835642 | -1184.590990         | 0.0504       |
|                              | 5a_sy_tr_1_r    |                                 | -1184.835938 | -1184.590648         | 0.0350       |
|                              | 5a_sy_tr_2      |                                 | -1184.831928 | -1184.587004         | 0.0007       |
|                              | 5a_sy_tr_2_r    |                                 | -1184.835128 | -1184.590051         | 0.0186       |
|                              | 5a_sy_tr_3      |                                 | -1184.829438 | -1184.582809         | 0.0000       |
|                              | 5a_sy_tr_3_r    |                                 | -1184.832276 | -1184.586730         | 0.0005       |
|                              | 5a_sy_tr_4      |                                 | -1184.837388 | -1184.593467         | 0.6958       |
|                              | 5a_sy_tr_5      |                                 | -1184.836886 | -1184.592249         | 0.1912       |
|                              | 5a_sy_tr_6      |                                 | -1184.829806 | -1184.583446         | 0.0000       |
|                              | 5a_sy_tr_7      |                                 | -1184.833221 | -1184.587679         | 0.0015       |
|                              | 5a_sy_tr_8      |                                 | -1184.833795 | -1184.589014         | 0.0062       |
|                              | 5a_sy_tr_9      |                                 | -1184.825549 | -1184.578730         | 0.0000       |
|                              | 5a_sy_tr_10     |                                 | -1184.829851 | -1184.584542         | 0.0001       |
|                              | weighted:       |                                 |              | -1184.592902         |              |
| <i>trans</i> -TS2 (5a+7)     | 5a_sy_tr_1_ts2  |                                 | -1184.824604 | -1184.581885         | 0.9320       |
|                              | 5a_sy_tr_3_ts2  |                                 | -1184.822244 | -1184.579416         | 0.0680       |
|                              |                 | weighted:                       |              |                      | -1184.581718 |
| <i>trans</i> -product (5a+7) | 5a_sy_tr_prod_1 |                                 | -706.950864  | -706.776810          | 0.0728       |
|                              | 5a_sy_tr_prod_2 |                                 | -706.954244  | -706.779210          | 0.9272       |
|                              |                 | weighted:                       |              |                      | -706.779035  |
|                              |                 | $G_{\text{trans}}^\ddagger$     | 78.3         | $\text{kJ mol}^{-1}$ |              |
|                              |                 | $G_{\text{IM, trans}}^0$        | 15.0         | $\text{kJ mol}^{-1}$ |              |
|                              |                 | $G_{\text{cp, trans}}^\ddagger$ | 44.3         | $\text{kJ mol}^{-1}$ |              |
|                              |                 | $G_{\text{trans}}^0$            | -165.6       | $\text{kJ mol}^{-1}$ |              |

|                            |                |              |              |        |
|----------------------------|----------------|--------------|--------------|--------|
| <i>cis</i> -TS1 (5a+7)     | 5a_sy_c_1_ts1  | -1184.797740 | -1184.554515 | 0.0000 |
|                            | 5a_sy_c_2_ts1  | -1184.806708 | -1184.564583 | 0.0146 |
|                            | 5a_sy_c_3_ts1  | -1184.805021 | -1184.561146 | 0.0004 |
|                            | 5a_sy_c_4_ts1  | -1184.810520 | -1184.568525 | 0.9502 |
|                            | 5a_sy_c_5_ts1  | -1184.807181 | -1184.564958 | 0.0216 |
|                            | 5a_sy_c_6_ts1  | -1184.806080 | -1184.564399 | 0.0120 |
|                            | 5a_sy_c_7_ts1  | -1184.804524 | -1184.562001 | 0.0009 |
|                            | 5a_sy_c_9_ts1  | -1184.803155 | -1184.560819 | 0.0003 |
|                            | weighted:      |              | -1184.568330 |        |
| <i>cis</i> -IM (5a+7)      | 5a_sy_c_1      | -1184.828479 | -1184.583478 | 0.0000 |
|                            | 5a_sy_c_1_r    | -1184.827150 | -1184.581328 | 0.0000 |
|                            | 5a_sy_c_2      | -1184.836086 | -1184.590896 | 0.0749 |
|                            | 5a_sy_c_2_r    | -1184.834393 | -1184.590451 | 0.0467 |
|                            | 5a_sy_c_3      | -1184.836586 | -1184.590964 | 0.0805 |
|                            | 5a_sy_c_3_r    | -1184.831011 | -1184.585385 | 0.0002 |
|                            | 5a_sy_c_4      | -1184.837415 | -1184.592573 | 0.4432 |
|                            | 5a_sy_c_4_r    | -1184.834335 | -1184.588763 | 0.0078 |
|                            | 5a_sy_c_5      | -1184.835094 | -1184.589432 | 0.0159 |
|                            | 5a_sy_c_5_r    | -1184.829238 | -1184.582795 | 0.0000 |
|                            | 5a_sy_c_6      | -1184.835378 | -1184.590568 | 0.0529 |
|                            | 5a_sy_c_7      | -1184.832311 | -1184.587040 | 0.0013 |
| 5a_sy_c_9                  | -1184.837641   | -1184.592129 | 0.2766       |        |
|                            | weighted:      |              | -1184.591901 |        |
| <i>cis</i> -TS2 (5a+7)     | 5a_sy_c_1_ts2  | -1184.817478 | -1184.573220 | 0.0082 |
|                            | 5a_sy_c_2_ts2  | -1184.819665 | -1184.577333 | 0.6432 |
|                            | 5a_sy_c_3_ts2  | -1184.818810 | -1184.575771 | 0.1228 |
|                            | 5a_sy_c_4_ts2  | -1184.819507 | -1184.576287 | 0.2121 |
|                            | 5a_sy_c_5_ts2  | -1184.816684 | -1184.573704 | 0.0137 |
|                            | weighted:      |              | -1184.576836 |        |
| <i>cis</i> -product (5a+7) | 5a_sy_c_prod_1 | -706.946613  | -706.772324  | 0.0863 |
|                            | 5a_sy_c_prod_2 | -706.949332  | -706.774549  | 0.9137 |
|                            | weighted:      |              | -706.774357  |        |

|                          |        |                      |
|--------------------------|--------|----------------------|
| $G_{cis}^{\ddagger}$     | 79.5   | $\text{kJ mol}^{-1}$ |
| $G_{IM, cis}^0$          | 17.6   | $\text{kJ mol}^{-1}$ |
| $G_{cp, cis}^{\ddagger}$ | 57.2   | $\text{kJ mol}^{-1}$ |
| $G_{cis}^0$              | -153.3 | $\text{kJ mol}^{-1}$ |

| <b>5b + 7</b> |             |              |              |        |
|---------------|-------------|--------------|--------------|--------|
| <b>5b</b>     | <b>5b</b>   | -383.756315  | -383.654836  |        |
| TS1 (5b+7)    | 5b_sy_1_ts1 | -1224.100343 | -1223.831375 | 0.0002 |
|               | 5b_sy_2_ts1 | -1224.101024 | -1223.833043 | 0.0014 |



|                             |                  |              |              |        |
|-----------------------------|------------------|--------------|--------------|--------|
|                             | 5b_sy_5_ts1      | -1224.109021 | -1223.838310 | 0.3825 |
|                             | 5b_sy_5_ts1_rot1 | -1224.105940 | -1223.836293 | 0.0451 |
|                             | 5b_sy_5_ts1_rot2 | -1224.102673 | -1223.835417 | 0.0178 |
|                             | 5b_sy_6_ts1      | -1224.101417 | -1223.832618 | 0.0009 |
|                             | 5b_sy_7_ts1      | -1224.103166 | -1223.835392 | 0.0173 |
|                             | 5b_sy_8_ts1      | -1224.103061 | -1223.835508 | 0.0196 |
|                             | 5b_sy_9_ts1      | -1224.103900 | -1223.836508 | 0.0566 |
|                             | 5b_sy_10_ts1     | -1224.108368 | -1223.838480 | 0.4584 |
|                             | weighted:        |              | -1223.838023 |        |
| <b>IM (5b+7)</b>            | 5b_sy_1          | -1224.135225 | -1223.861724 | 0.0016 |
|                             | 5b_sy_1_r        | -1224.132898 | -1223.862576 | 0.0040 |
|                             | 5b_sy_2          | -1224.134619 | -1223.860940 | 0.0007 |
|                             | 5b_sy_2_r2       | -1224.132990 | -1223.861002 | 0.0008 |
|                             | 5b_sy_2_r3       | -1224.133619 | -1223.861551 | 0.0014 |
|                             | 5b_sy_2_r4       | -1224.134822 | -1223.862744 | 0.0048 |
|                             | 5b_sy_2_r        | -1224.132985 | -1223.862451 | 0.0035 |
|                             | 5b_sy_3          | -1224.139800 | -1223.866229 | 0.1940 |
|                             | 5b_sy_3_r        | -1224.134609 | -1223.863511 | 0.0109 |
|                             | 5b_sy_4          | -1224.136769 | -1223.864097 | 0.0202 |
|                             | 5b_sy_5          | -1224.139418 | -1223.866172 | 0.1825 |
|                             | 5b_sy_5_r        | -1224.133617 | -1223.861611 | 0.0014 |
|                             | 5b_sy_6          | -1224.139000 | -1223.865617 | 0.1014 |
|                             | 5b_sy_6_r        | -1224.134754 | -1223.863392 | 0.0096 |
|                             | 5b_sy_8          | -1224.135715 | -1223.863432 | 0.0100 |
|                             | 5b_sy_9          | -1224.135248 | -1223.863493 | 0.0107 |
|                             | 5b_sy_10         | -1224.138546 | -1223.866859 | 0.3784 |
|                             | 5b_sy_11         | -1224.135620 | -1223.861248 | 0.0010 |
|                             | 5b_sy_12         | -1224.131082 | -1223.859022 | 0.0001 |
|                             | 5b_sy_13         | -1224.131722 | -1223.857915 | 0.0000 |
|                             | 5b_sy_14         | -1224.135394 | -1223.864316 | 0.0255 |
|                             | 5b_sy_15         | -1224.135189 | -1223.864677 | 0.0374 |
|                             | 5b_sy_16         | -1224.131624 | -1223.859344 | 0.0001 |
|                             | weighted:        |              | -1223.866052 |        |
| <b>trans-TS2 (5b+7)</b>     | 5b_tr_1_ts2      | -1224.125656 | -1223.856115 | 0.0366 |
|                             | 5b_tr_2_ts2      | -1224.125901 | -1223.856194 | 0.0398 |
|                             | 5b_tr_3_ts2      | -1224.127012 | -1223.856848 | 0.0797 |
|                             | 5b_tr_4_ts2      | -1224.127615 | -1223.858876 | 0.6839 |
|                             | 5b_tr_6_ts2      | -1224.127318 | -1223.857505 | 0.1599 |
|                             | weighted:        |              | -1223.858287 |        |
| <b>trans-product (5b+7)</b> | 5b_sy_tr_prod_1  | -746.248951  | -746.048930  | 0.8079 |
|                             | 5b_sy_tr_prod_2  | -746.246987  | -746.046869  | 0.0908 |
|                             | 5b_sy_tr_prod_3  | -746.248289  | -746.046959  | 0.0999 |
|                             | 5b_sy_tr_prod_5  | -746.243114  | -746.042902  | 0.0014 |
|                             | weighted:        |              | -746.048538  |        |

|                                     |                |              |              |        |
|-------------------------------------|----------------|--------------|--------------|--------|
| <i>cis</i> -TS2 ( <b>5b+7</b> )     | 5b_c_2_r2_ts2  | -1224.122817 | -1223.853019 | 0.0554 |
|                                     | 5b_c_2_r3_ts2  | -1224.124495 | -1223.855387 | 0.6815 |
|                                     | 5b_c_2_r4_ts2  | -1224.124738 | -1223.854489 | 0.2632 |
|                                     | weighted:      |              | -1223.855019 |        |
| <i>cis</i> -product ( <b>5b+7</b> ) | 5b_sy_c_prod_1 | -746.250103  | -746.049796  | 0.1640 |
|                                     | 5b_sy_c_prod_2 | -746.250315  | -746.051214  | 0.7373 |
|                                     | 5b_sy_c_prod_4 | -746.250173  | -746.049317  | 0.0987 |
|                                     | weighted:      |              | -746.050794  |        |

|                                 |        |                      |
|---------------------------------|--------|----------------------|
| $G^\ddagger$                    | 68.6   | $\text{kJ mol}^{-1}$ |
| $G_{\text{IM}}^0$               | -5.0   | $\text{kJ mol}^{-1}$ |
| $G_{\text{cp, cis}}^\ddagger$   | 24.0   | $\text{kJ mol}^{-1}$ |
| $G_{\text{cis}}^0$              | -181.9 | $\text{kJ mol}^{-1}$ |
| $G_{\text{cp, trans}}^\ddagger$ | 15.4   | $\text{kJ mol}^{-1}$ |
| $G_{\text{trans}}^0$            | -176.0 | $\text{kJ mol}^{-1}$ |

#### (*E*)/(*Z*)-Pentenone + 7

|                        |                    |              |              |           |
|------------------------|--------------------|--------------|--------------|-----------|
|                        | e_pentenone_1      | -270.451269  | -270.363875  | 0.5909    |
|                        | e_pentenone_2      | -270.450203  | -270.363528  | 0.4091    |
|                        | weighted:          |              | -270.363733  |           |
|                        | z_pentenone_1      | -270.444870  | -270.357441  | 0.0683    |
|                        | z_pentenone_2      | -270.446077  | -270.359906  | 0.9317    |
|                        | weighted:          |              | -270.359738  |           |
| TS1 (( <i>E</i> ) + 7) | e_pent_sr_oe_1_ts1 | -1110.795242 | -1110.539755 | 0.0004    |
|                        | e_pent_sr_oe_2_ts1 | -1110.790301 | -1110.534896 | 0.0000    |
|                        | e_pent_sr_oe_3_ts1 | -1110.788381 | -1110.532292 | 0.0000    |
|                        | e_pent_sr_oe_4_ts1 | -1110.790716 | -1110.535082 | 0.0000    |
|                        | e_pent_sr_oe_5_ts1 | -1110.796443 | -1110.540731 | 0.0012    |
|                        | e_pent_sr_oz_1_ts1 | -1110.801484 | -1110.546202 | 0.4026    |
|                        | e_pent_sr_oz_2_ts1 | -1110.796298 | -1110.542684 | 0.0097    |
|                        | e_pent_sr_oz_3_ts1 | -1110.788832 | -1110.532474 | 0.0000    |
|                        | e_pent_sr_oz_4_ts1 | -1110.792300 | -1110.536466 | 0.0000    |
|                        | e_pent_sr_oz_5_ts1 | -1110.792847 | -1110.538800 | 0.0002    |
|                        | e_pent_ss_oe_1_ts1 | -1110.786641 | -1110.531790 | 0.0000    |
|                        | e_pent_ss_oe_2_ts1 | -1110.795386 | -1110.541174 | 0.0020    |
|                        | e_pent_ss_oe_3_ts1 | -1110.795054 | -1110.538157 | 0.0001    |
|                        | e_pent_ss_oe_4_ts1 | -1110.789144 | -1110.532308 | 0.0000    |
|                        | e_pent_ss_oe_6_ts1 | -1110.786268 | -1110.531902 | 0.0000    |
|                        | e_pent_ss_oe_8_ts1 | -1110.795454 | -1110.539326 | 0.0003    |
|                        | e_pent_ss_oe_9_ts1 | -1110.797873 | -1110.543229 | 0.0172/OE |
|                        | e_pent_ss_oz_1_ts1 | -1110.792437 | -1110.538884 | 0.0002    |
|                        | e_pent_ss_oz_2_ts1 | -1110.799715 | -1110.546510 | 0.5582/OZ |

|                     |              |              |        |
|---------------------|--------------|--------------|--------|
| e_pent_ss_oz_3_ts1  | -1110.795402 | -1110.542361 | 0.0069 |
| e_pent_ss_oz_4_ts1  | -1110.792524 | -1110.538930 | 0.0002 |
| e_pent_ss_oz_7_ts1  | -1110.792911 | -1110.538552 | 0.0001 |
| e_pent_ss_oz_9_ts1  | -1110.793003 | -1110.537945 | 0.0001 |
| e_pent_ss_oz_10_ts1 | -1110.794199 | -1110.540323 | 0.0008 |

OE/OZ indicates the conformers used for calculating the individual barriers.

weighted: -1110.546230

TS1 ((Z) + 7)

|                                   |              |              |           |
|-----------------------------------|--------------|--------------|-----------|
| z_pent_sr_oe_1_ts1                | -1110.786849 | -1110.531722 | 0.0001    |
| z_pent_sr_oe_2_ts1                | -1110.791650 | -1110.533101 | 0.0003    |
| z_pent_sr_oe_3_ts1                | -1110.789976 | -1110.532492 | 0.0001    |
| z_pent_sr_oe_4_ts1                | -1110.782538 | -1110.525927 | 0.0000    |
| z_pent_sr_oe_5_ts1                | -1110.794017 | -1110.537695 | 0.0358    |
| z_pent_sr_oz_1_ts1                | -1110.793767 | -1110.539544 | 0.2540    |
| z_pent_sr_oz_2_ts1                | -1110.792782 | -1110.538747 | 0.1091    |
| z_pent_sr_oz_3_ts1                | -1110.789926 | -1110.535578 | 0.0038    |
| z_pent_sr_oz_4_ts1                | -1110.791960 | -1110.534964 | 0.0020    |
| z_pent_sr_oz_5_ts1                | -1110.789497 | -1110.535227 | 0.0026    |
| z_pent_ss_oe_1_ts1                | -1110.783853 | -1110.529108 | 0.0000    |
| z_pent_ss_oe_2_ts1                | -1110.788299 | -1110.534079 | 0.0008    |
| z_pent_ss_oe_3_ts1                | -1110.785720 | -1110.528311 | 0.0000    |
| z_pent_ss_oe_4_ts1                | -1110.786007 | -1110.530420 | 0.0000    |
| z_pent_ss_oe_7_ts1                | -1110.786640 | -1110.531784 | 0.0001    |
| z_pent_ss_oe_8_fr_ts1             | -1110.795242 | -1110.537716 | 0.0366/OE |
| z_pent_ss_oz_1_ts1                | -1110.787994 | -1110.534438 | 0.0011    |
| z_pent_ss_oz_2_ts1                | -1110.785855 | -1110.532474 | 0.0001    |
| z_pent_ss_oz_3_ts1 <sup>[a]</sup> | -1110.793031 | -1110.539616 | 0.2741/OZ |
| z_pent_ss_oz_6_ts1 <sup>[a]</sup> | -1110.795465 | -1110.539590 | 0.2666/OZ |
| z_pent_ss_oz_9_ts1                | -1110.791775 | -1110.536726 | 0.0128    |

OE/OZ indicates the conformers used for calculating the individual barriers.

weighted: -1110.539269

|                                    |      |                      |
|------------------------------------|------|----------------------|
| $G_{(E),\text{weighted}}^\ddagger$ | 70.4 | $\text{kJ mol}^{-1}$ |
| $G_{(Z),\text{weighted}}^\ddagger$ | 78.2 | $\text{kJ mol}^{-1}$ |

$G^\ddagger$  of most favorable conformer for each transition state (highlighted in green):

|                                   |      |                      |
|-----------------------------------|------|----------------------|
| $G_{(E),\text{s-trans}}^\ddagger$ | 78.3 | $\text{kJ mol}^{-1}$ |
| $G_{(Z),\text{s-trans}}^\ddagger$ | 82.3 | $\text{kJ mol}^{-1}$ |
| $G_{(E),\text{s-cis}}^\ddagger$   | 69.7 | $\text{kJ mol}^{-1}$ |
| $G_{(Z),\text{s-cis}}^\ddagger$   | 77.3 | $\text{kJ mol}^{-1}$ |

[a] For the picture shown in Figure 6 in the main text, the structure for “z\_pent\_ss\_oz\_6\_ts1” was used as it has a similar conformation as the other systems. This conformer is slightly disfavored by 0.04 kJ/mol relative to the most favorable conformer, “z\_pent\_ss\_oz\_3\_ts1”.

# Copies of NMR Spectra of Isolated Products

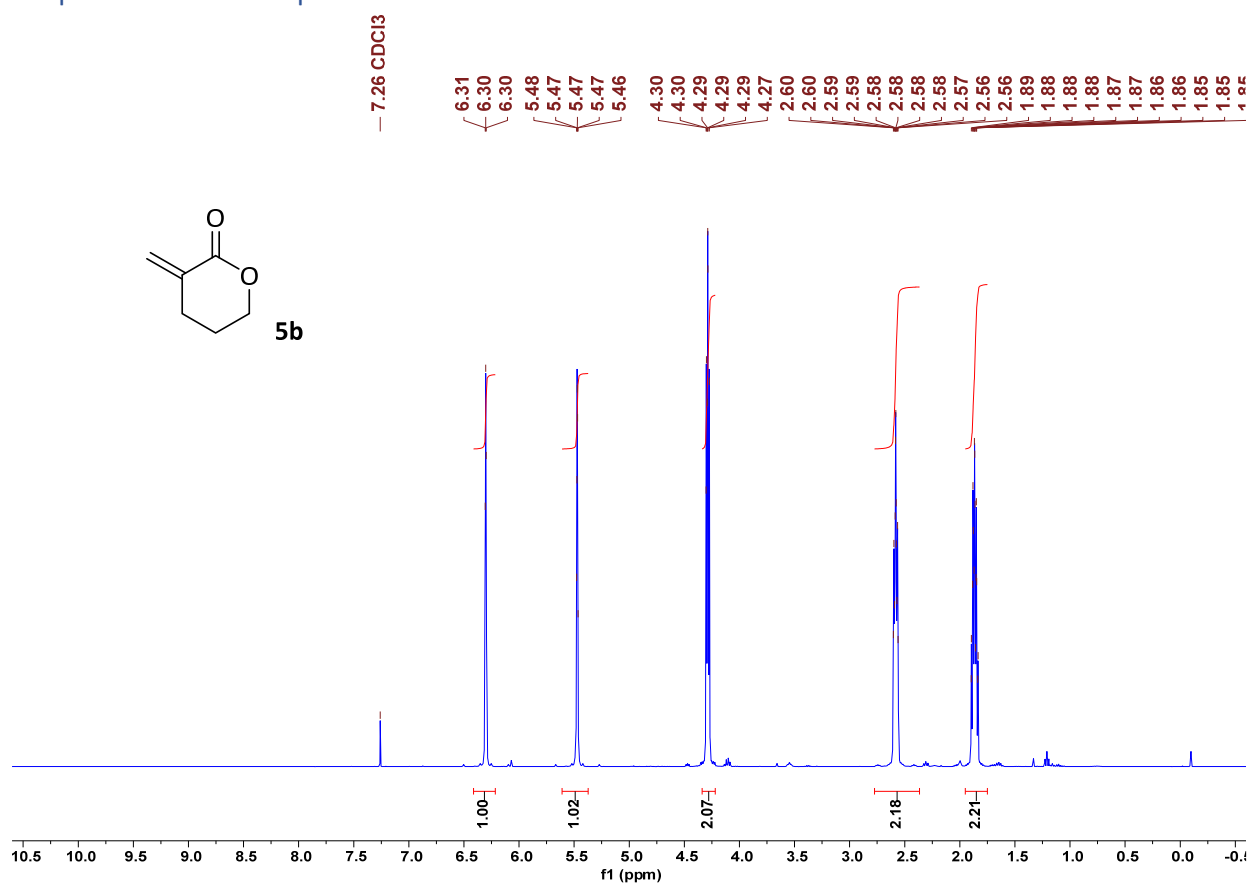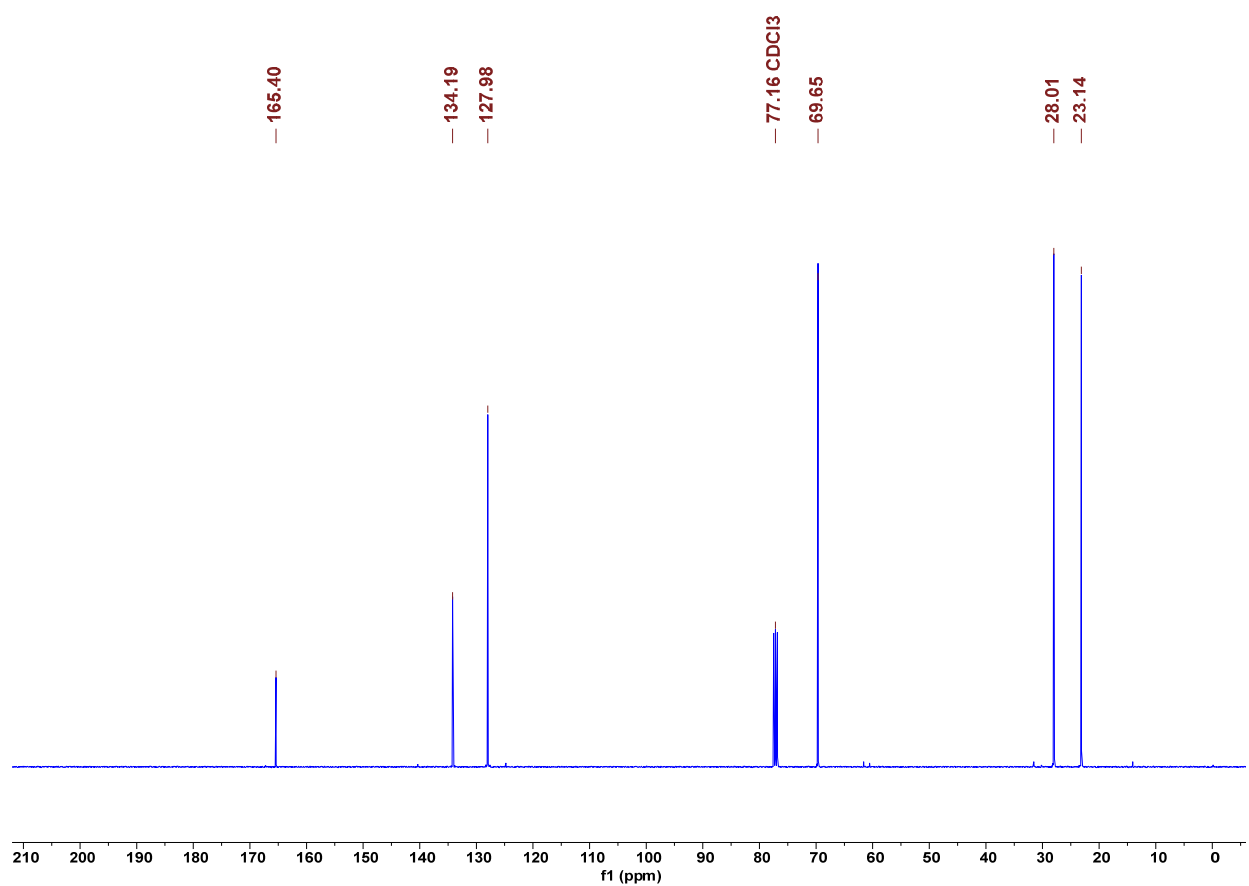

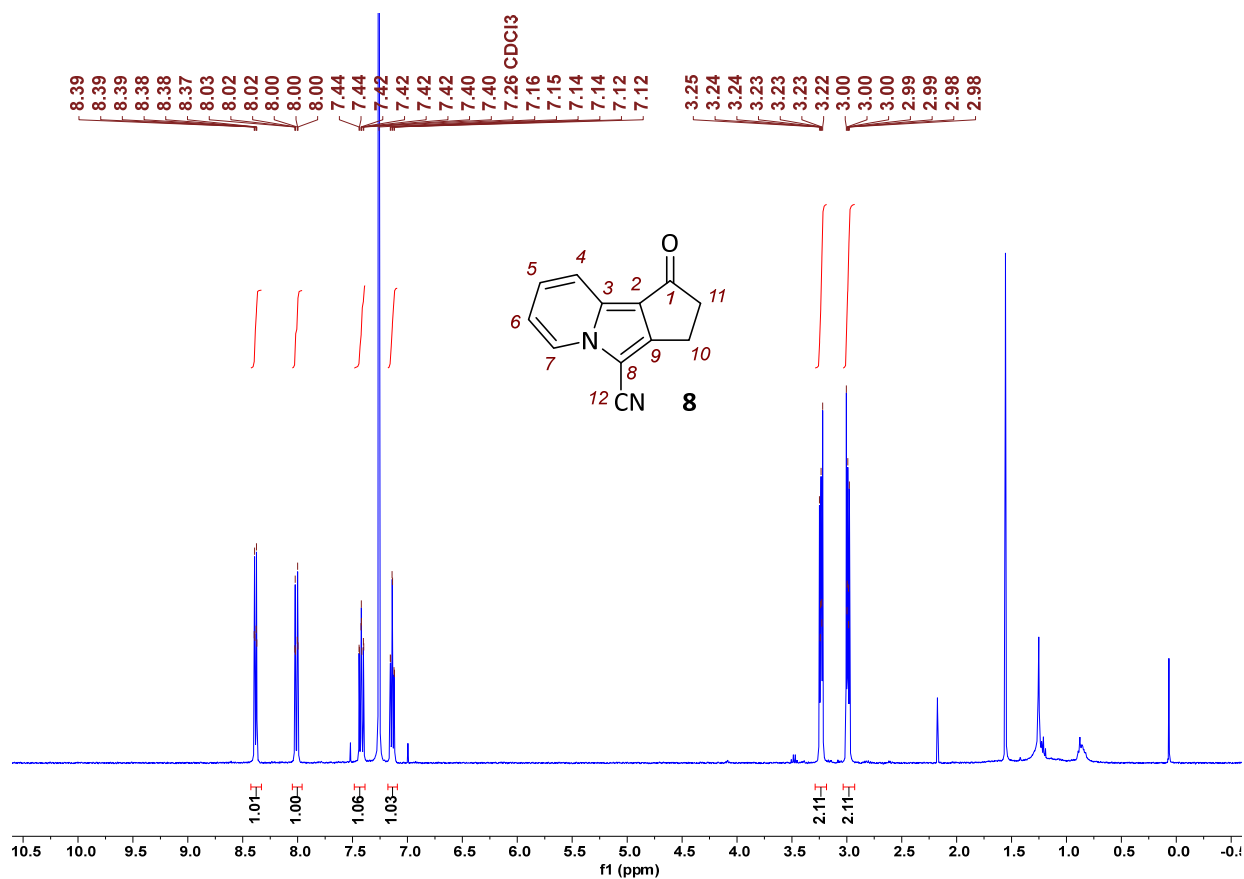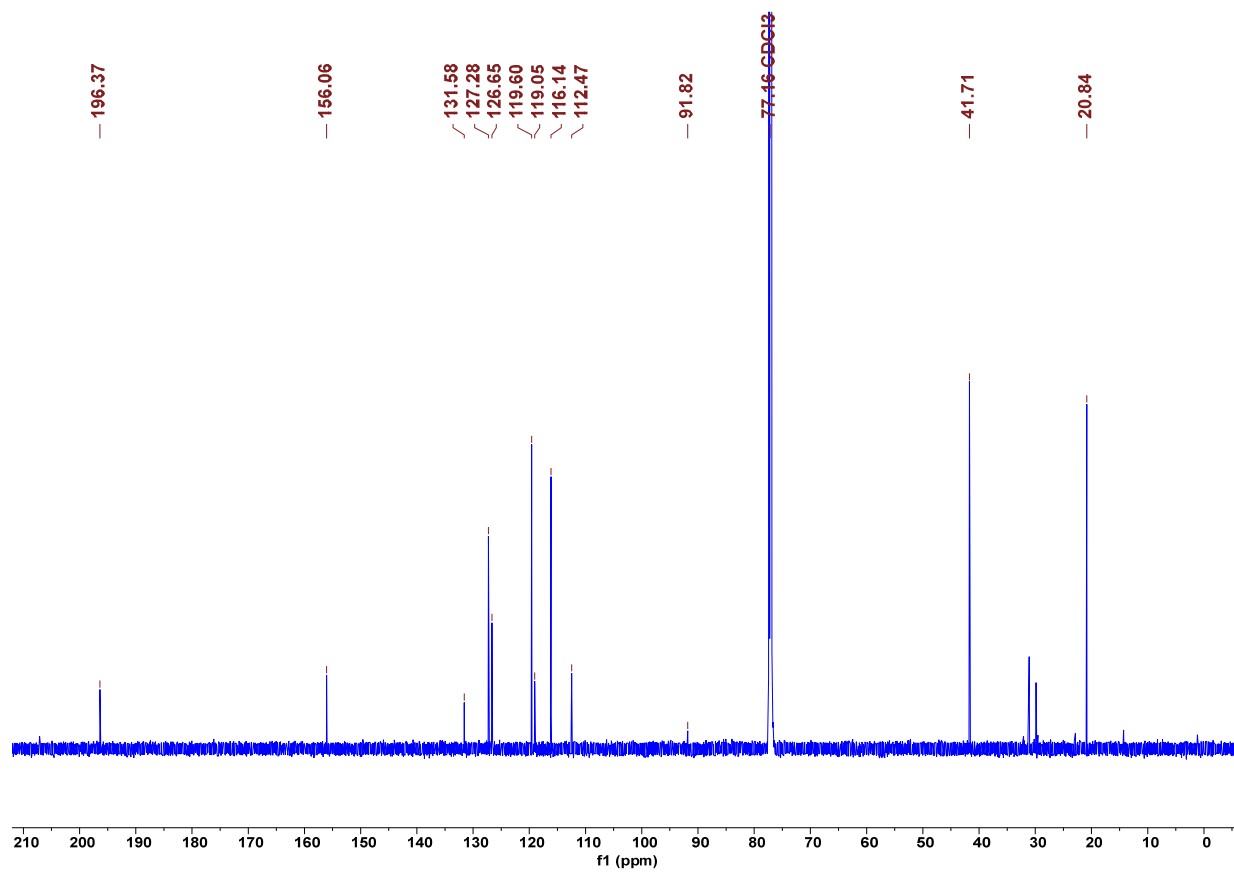

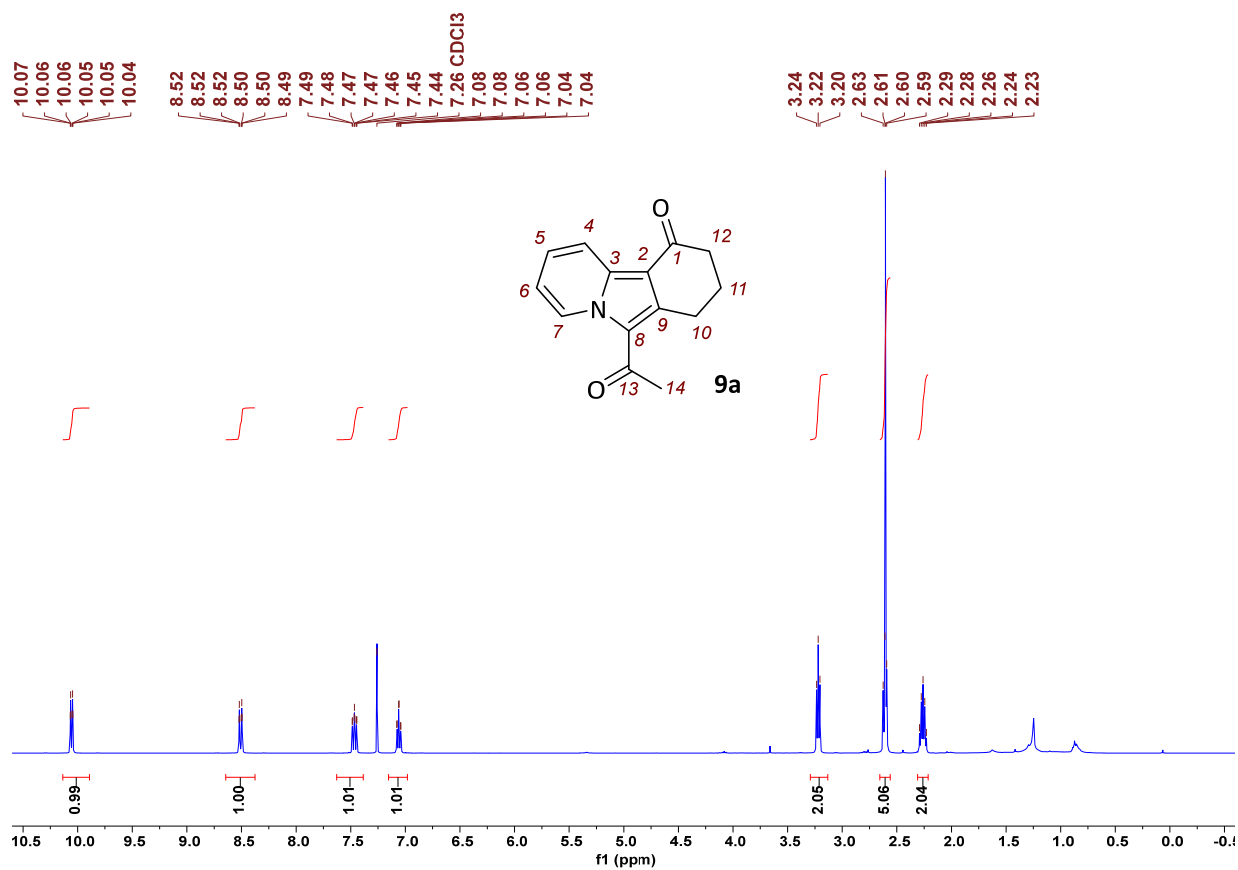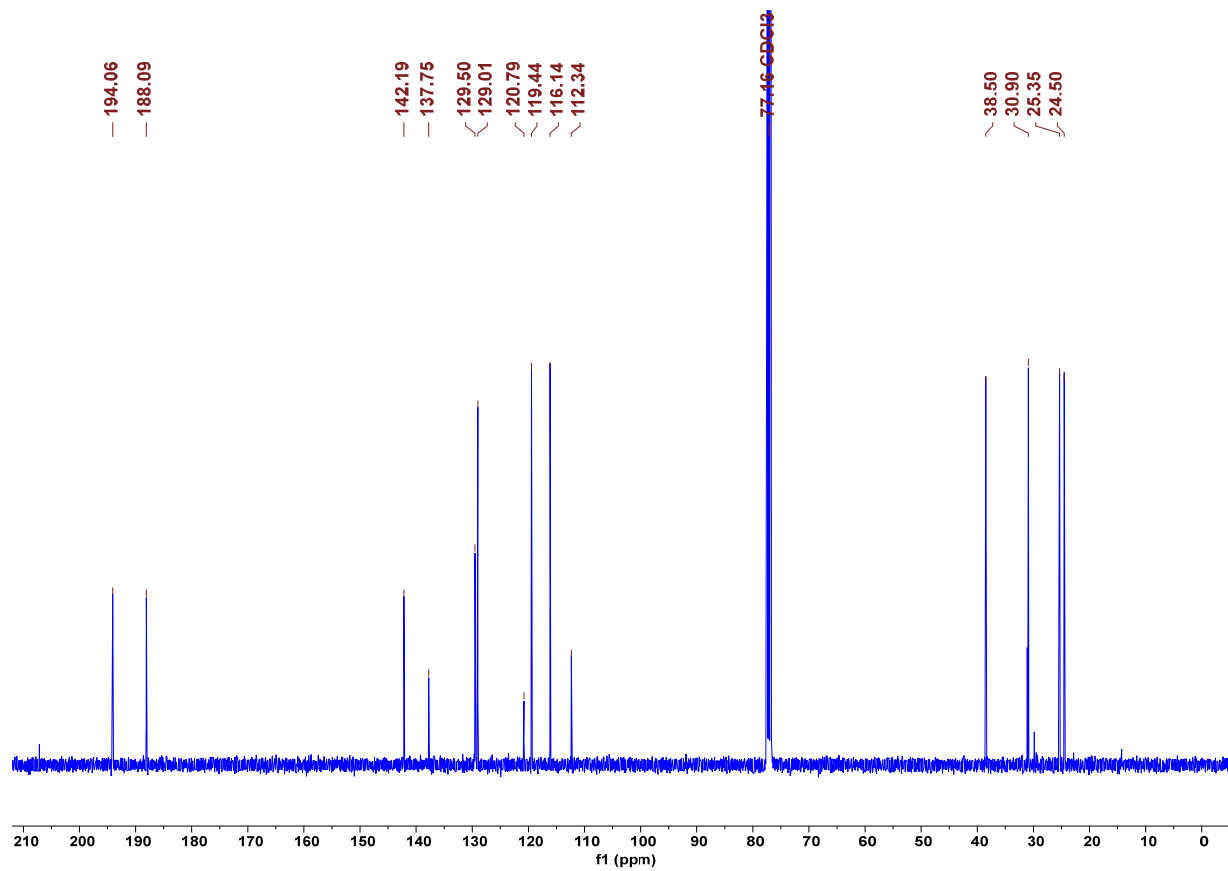

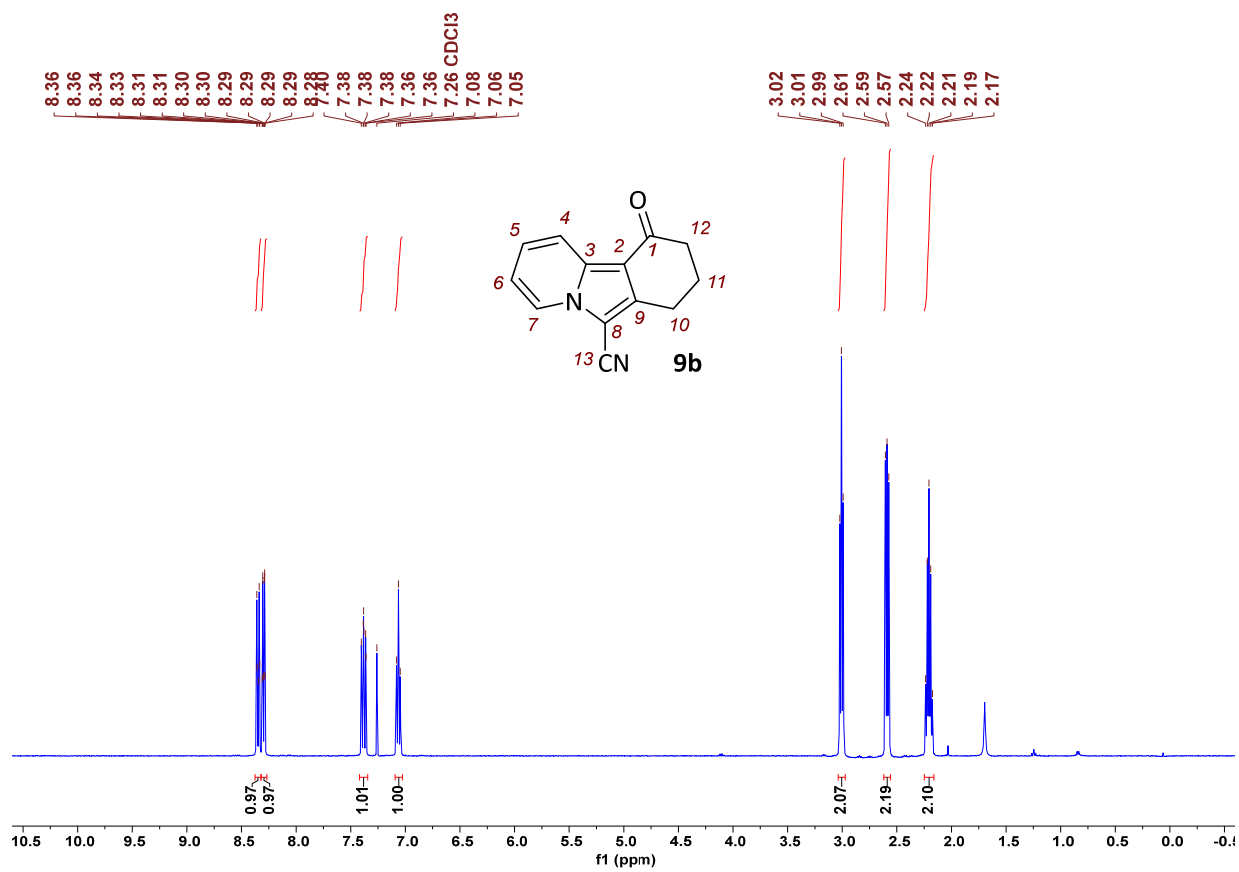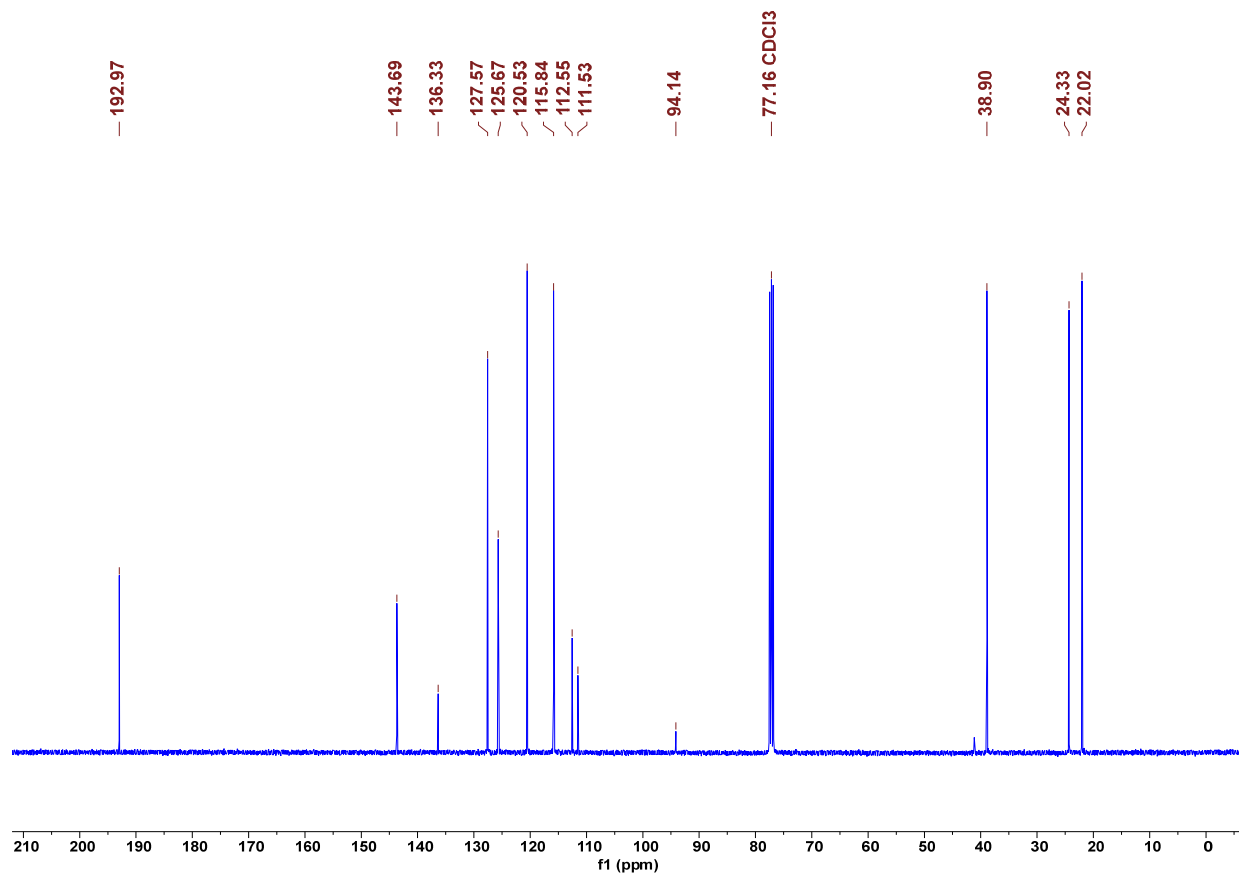

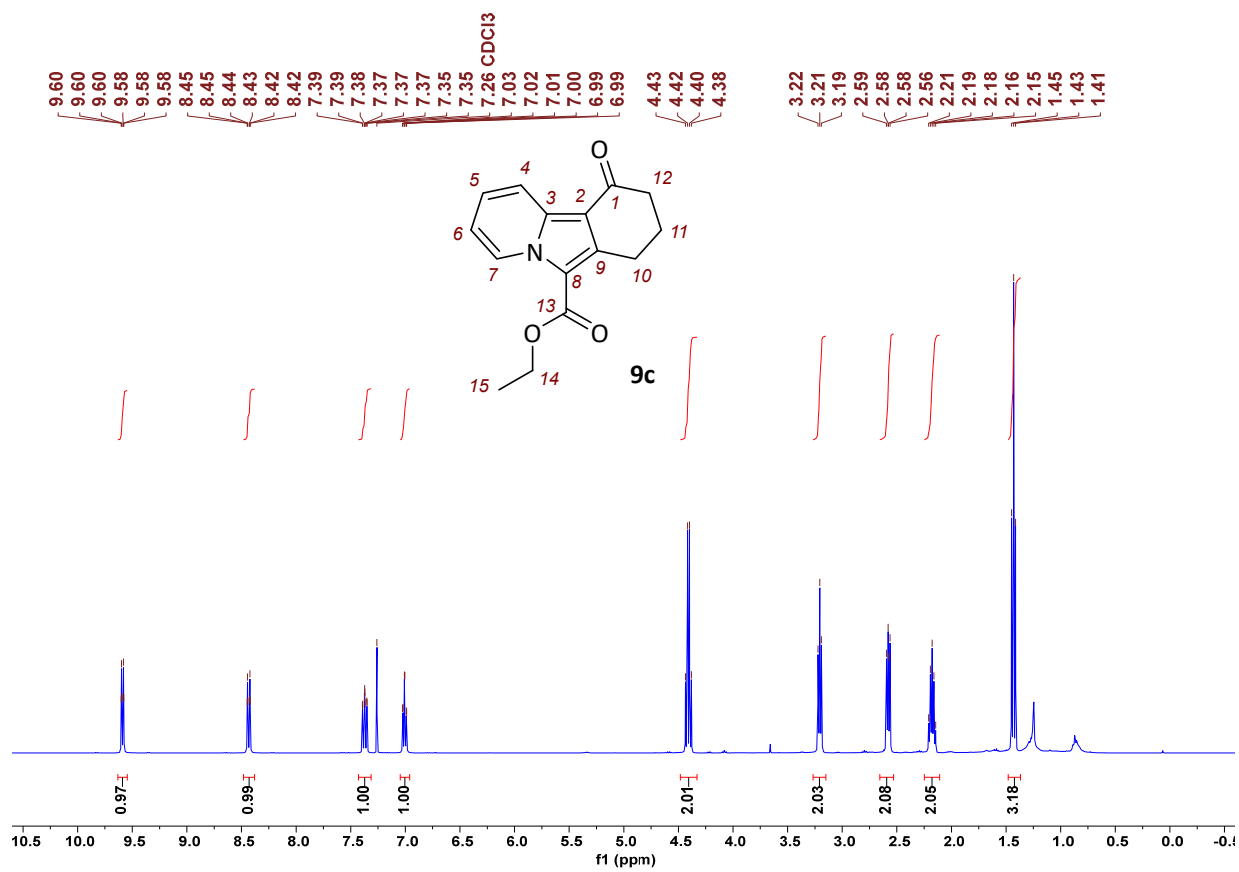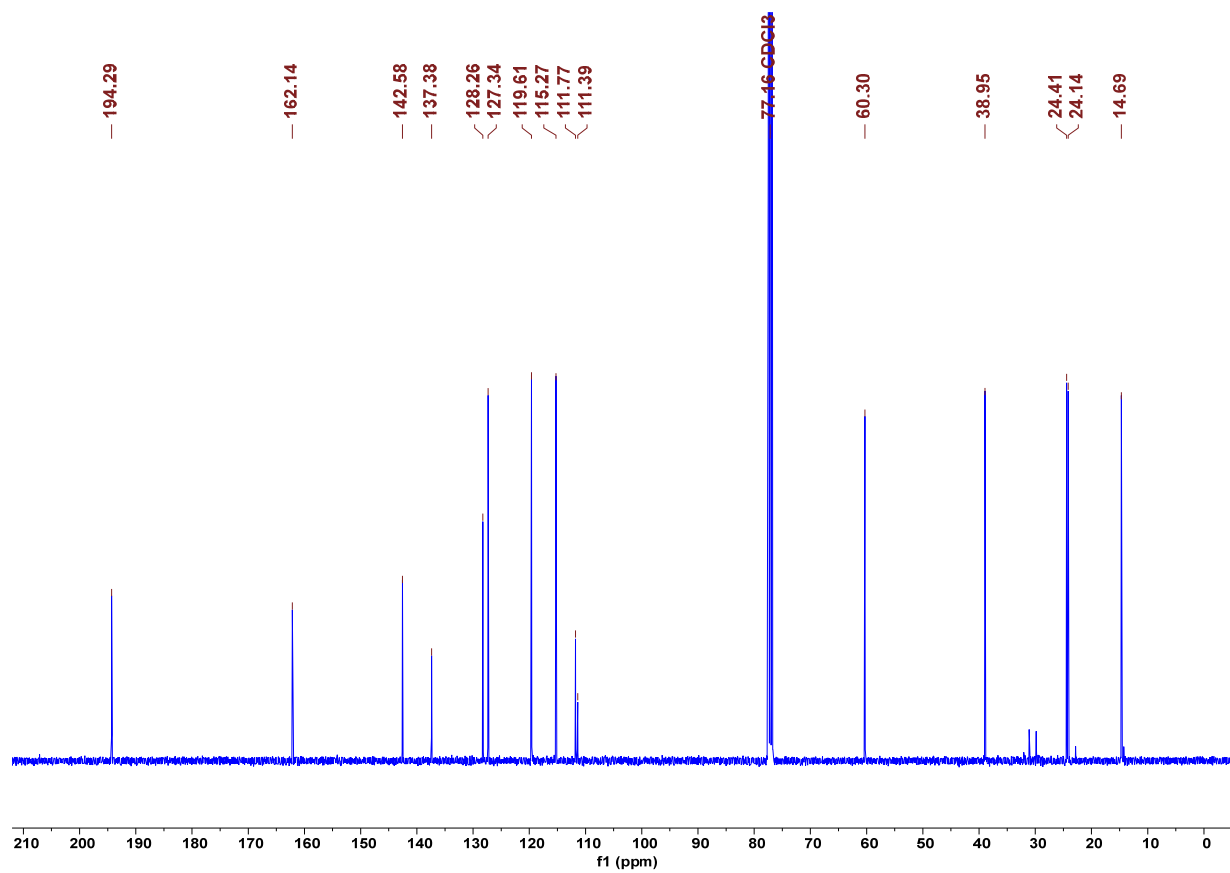



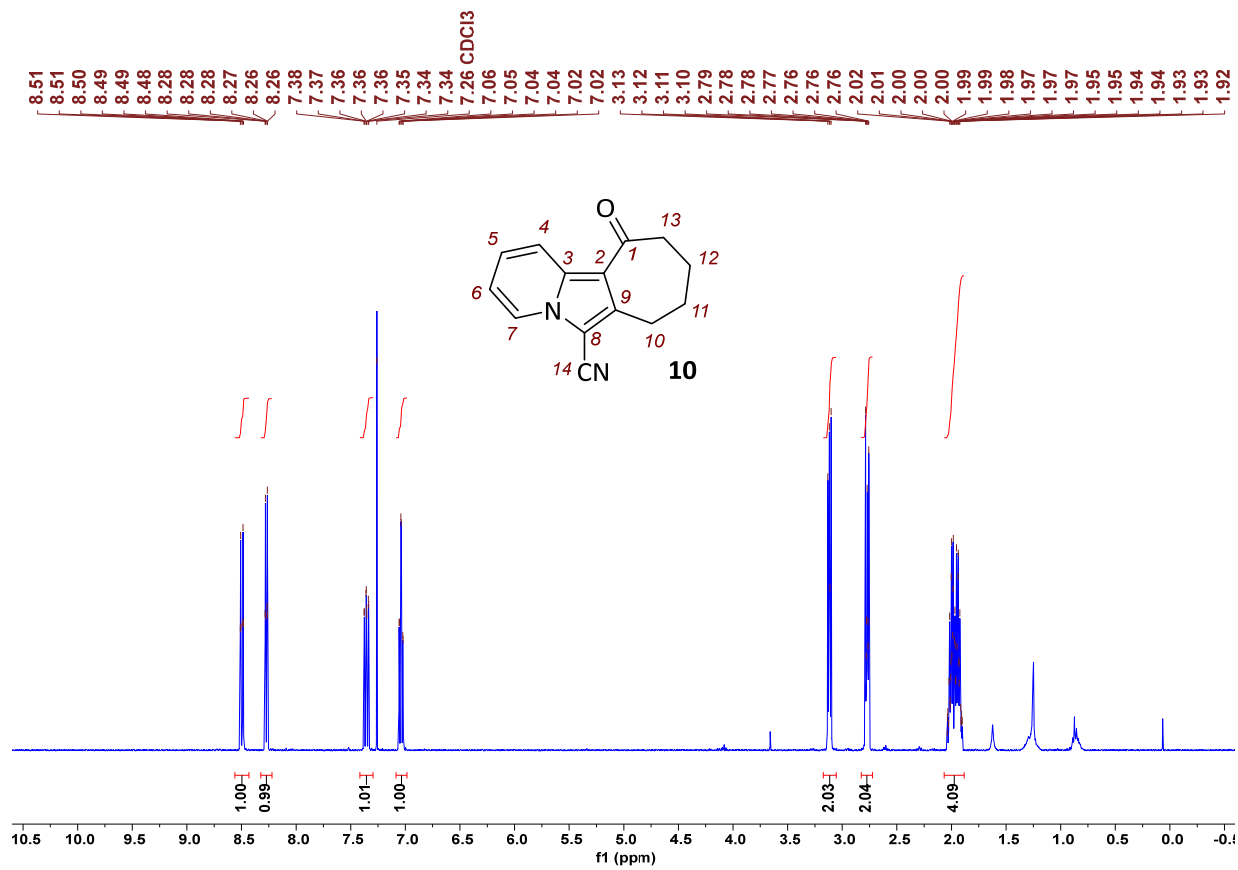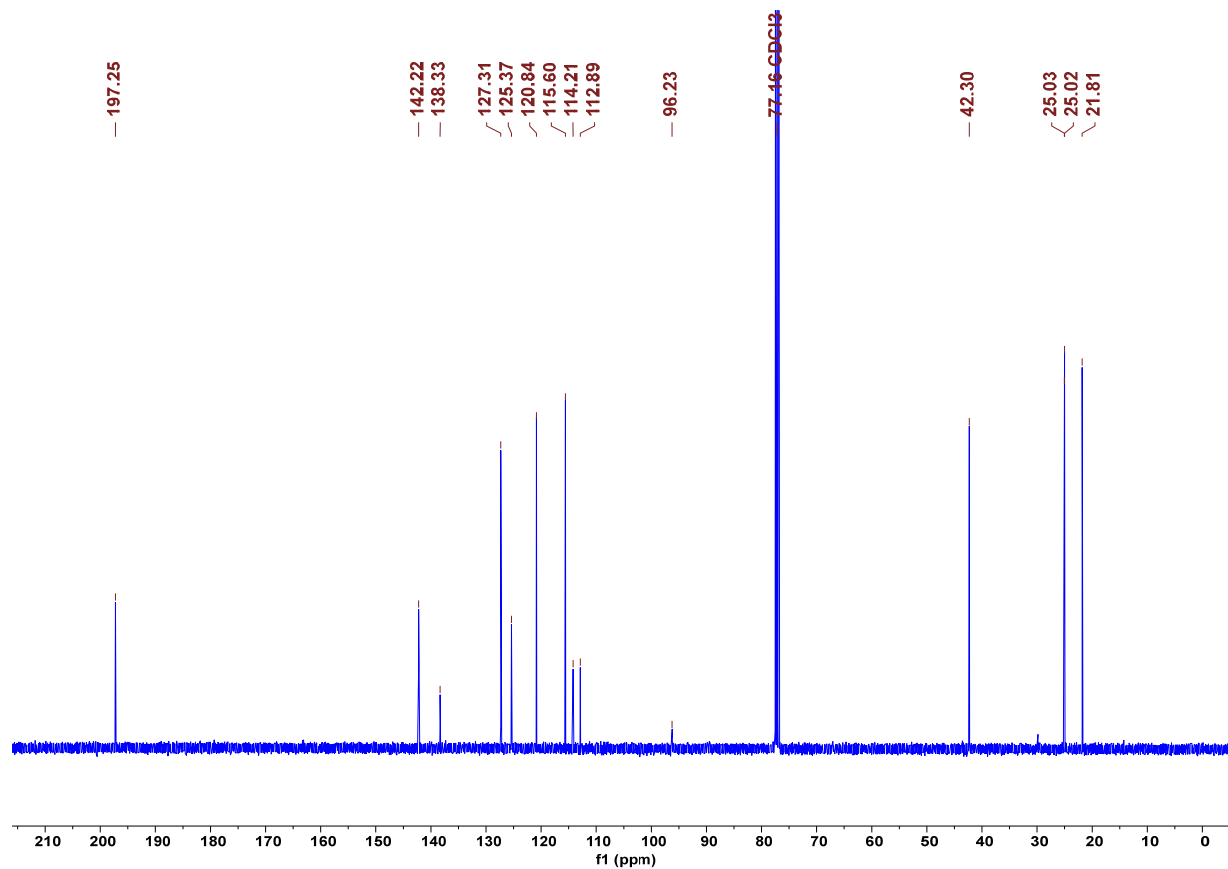

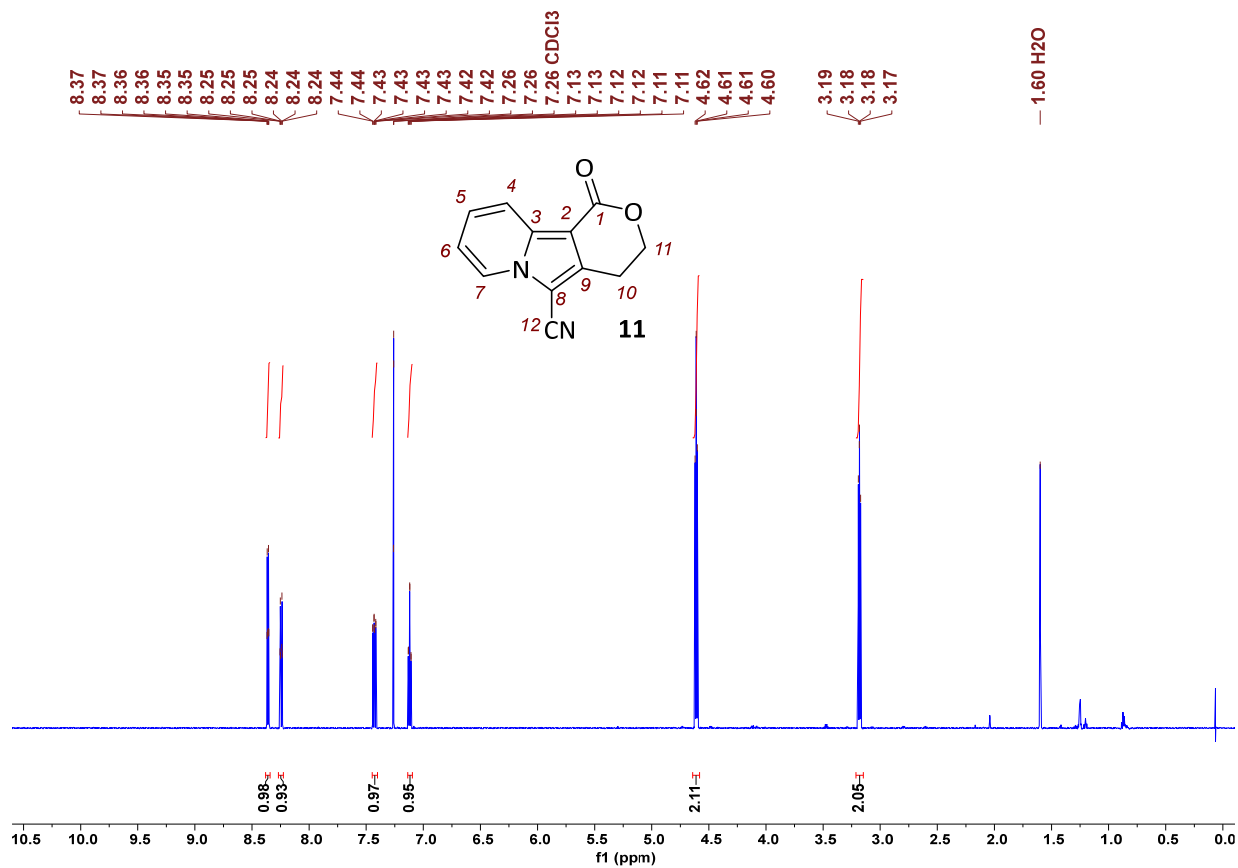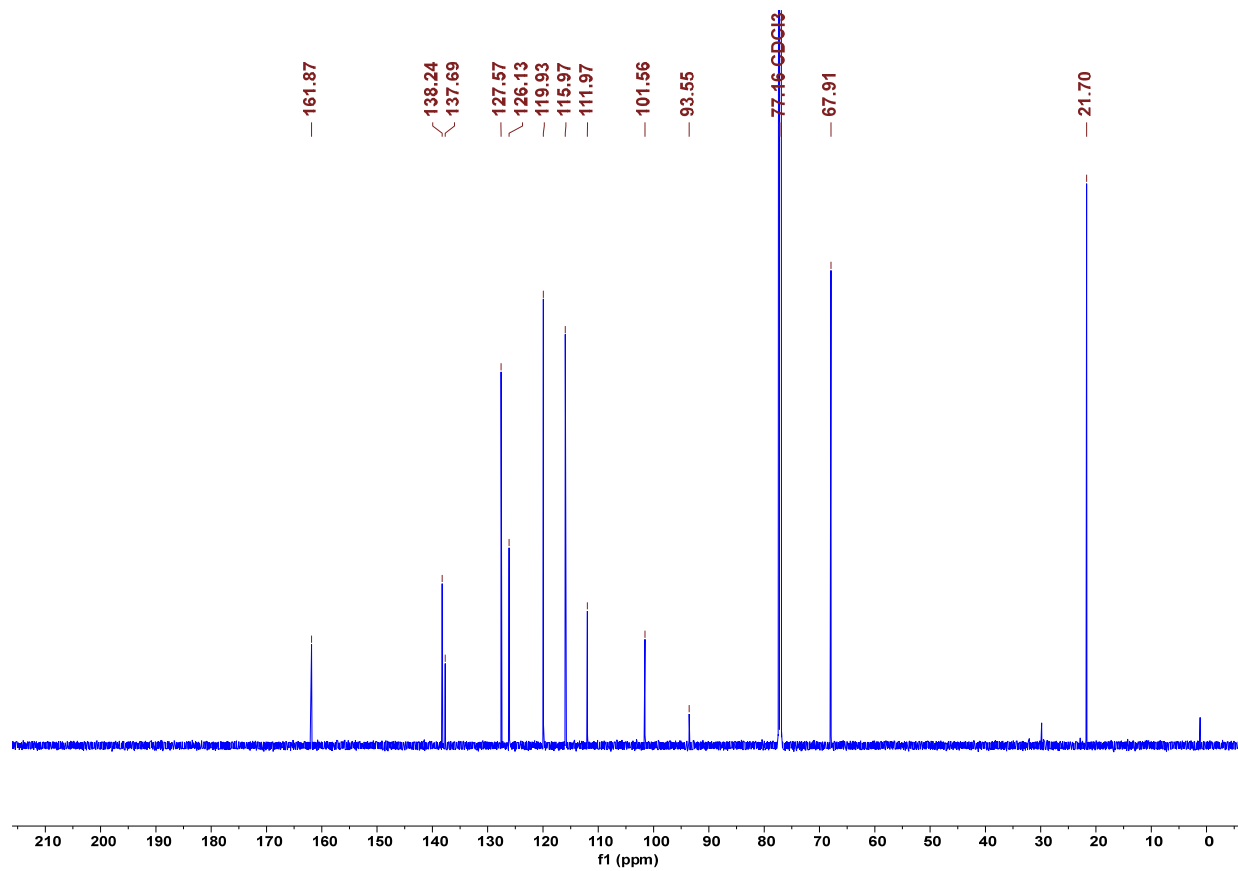

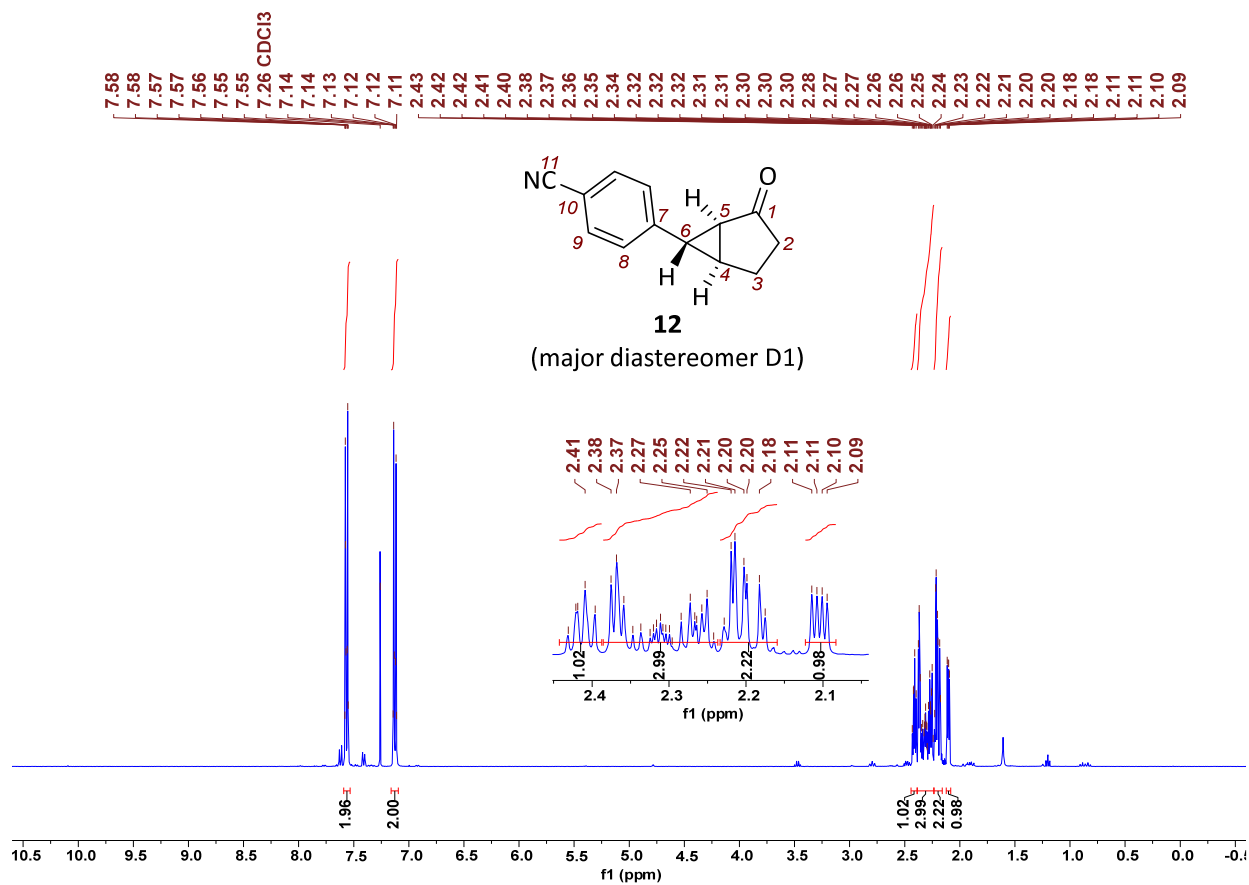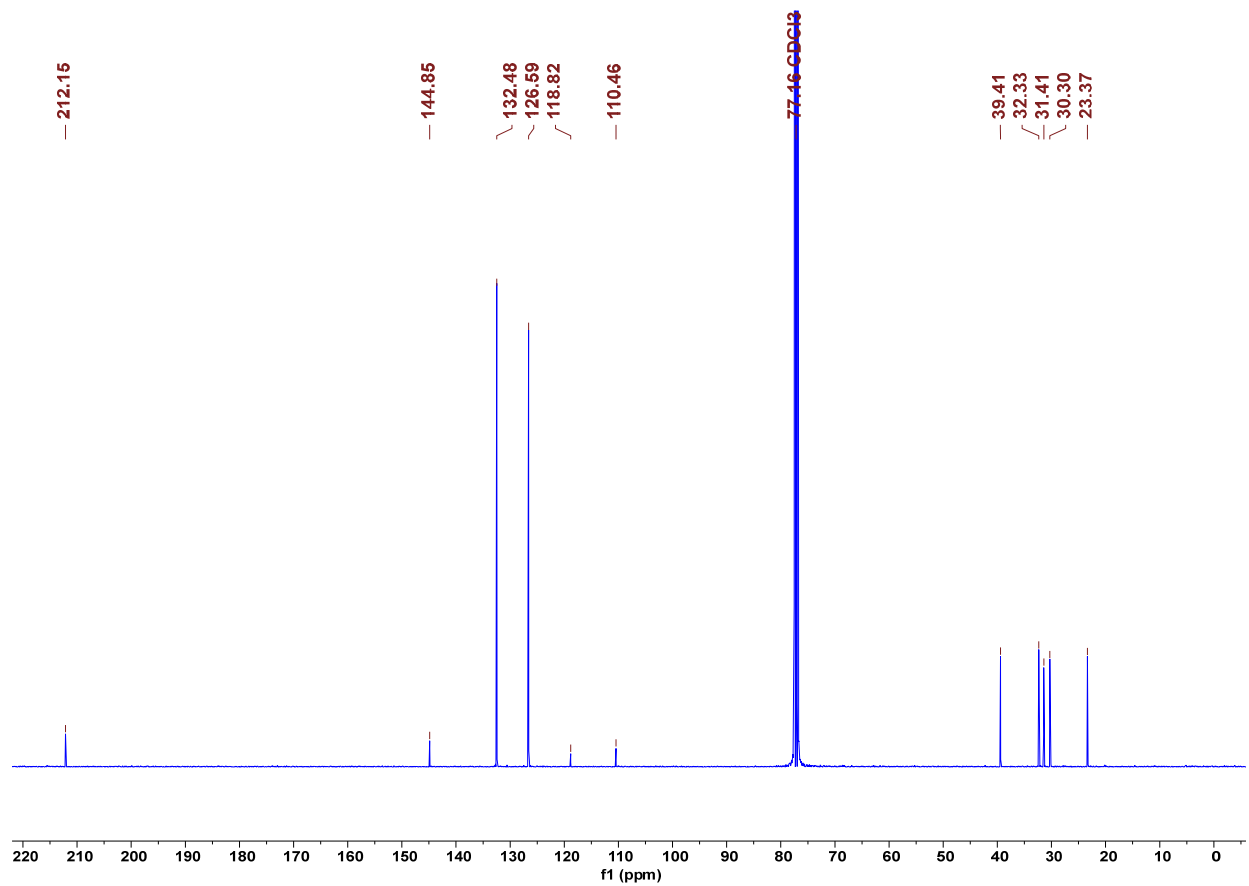

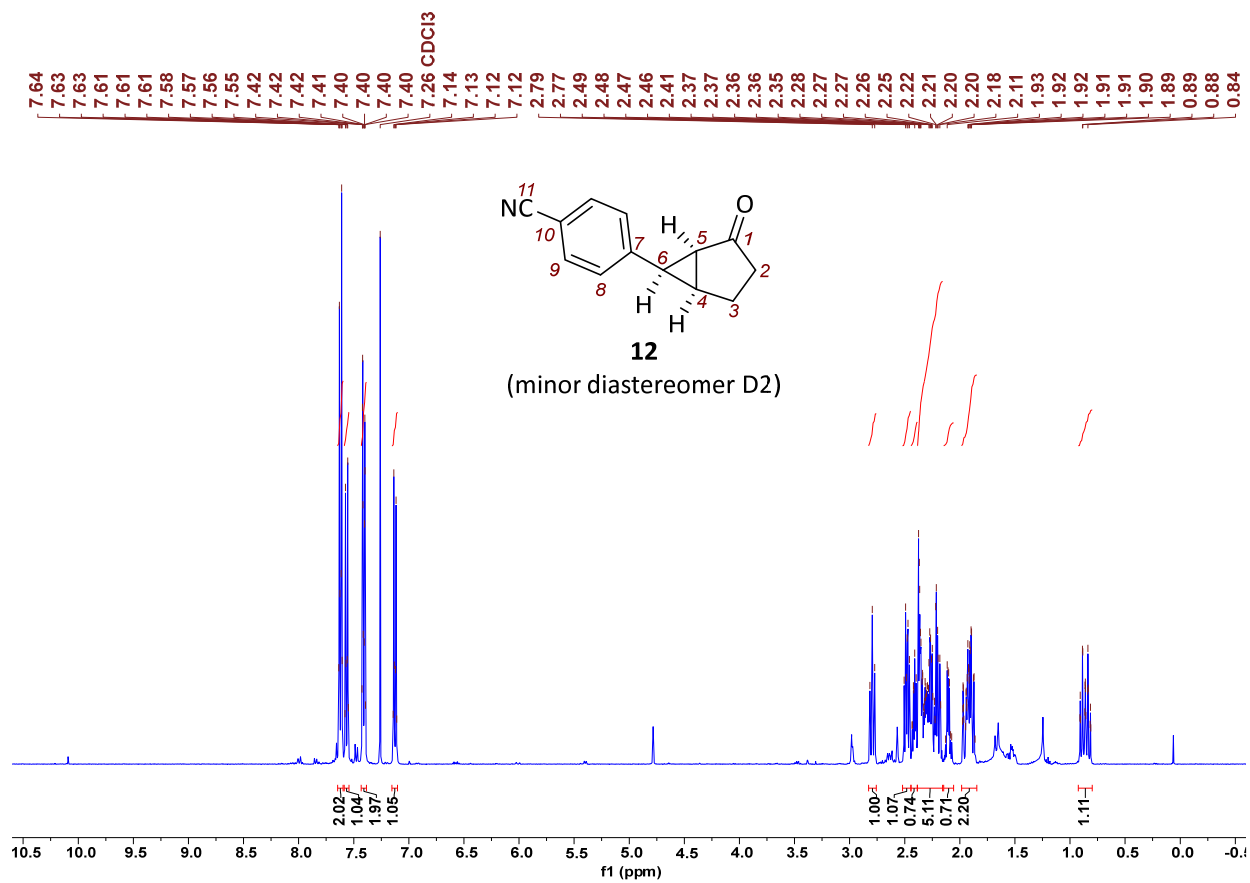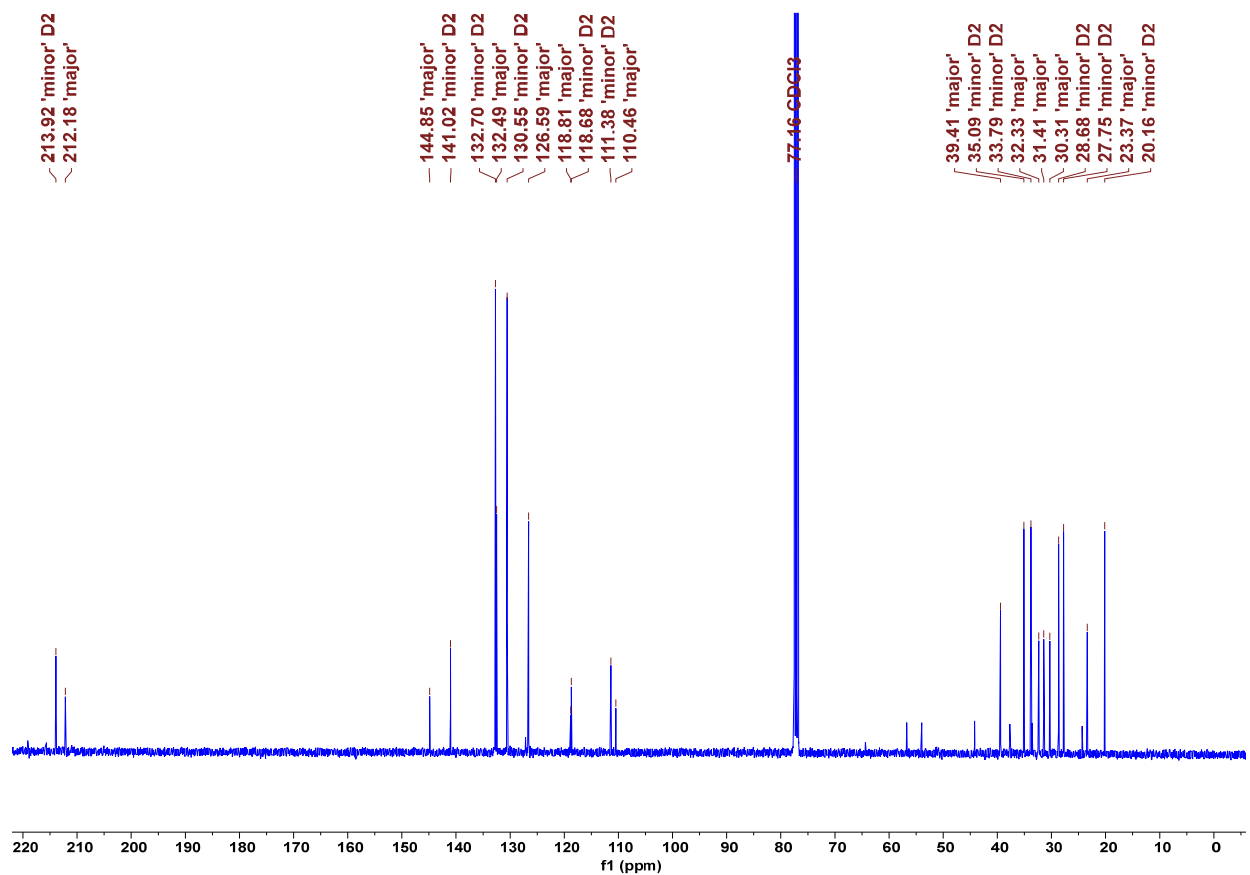

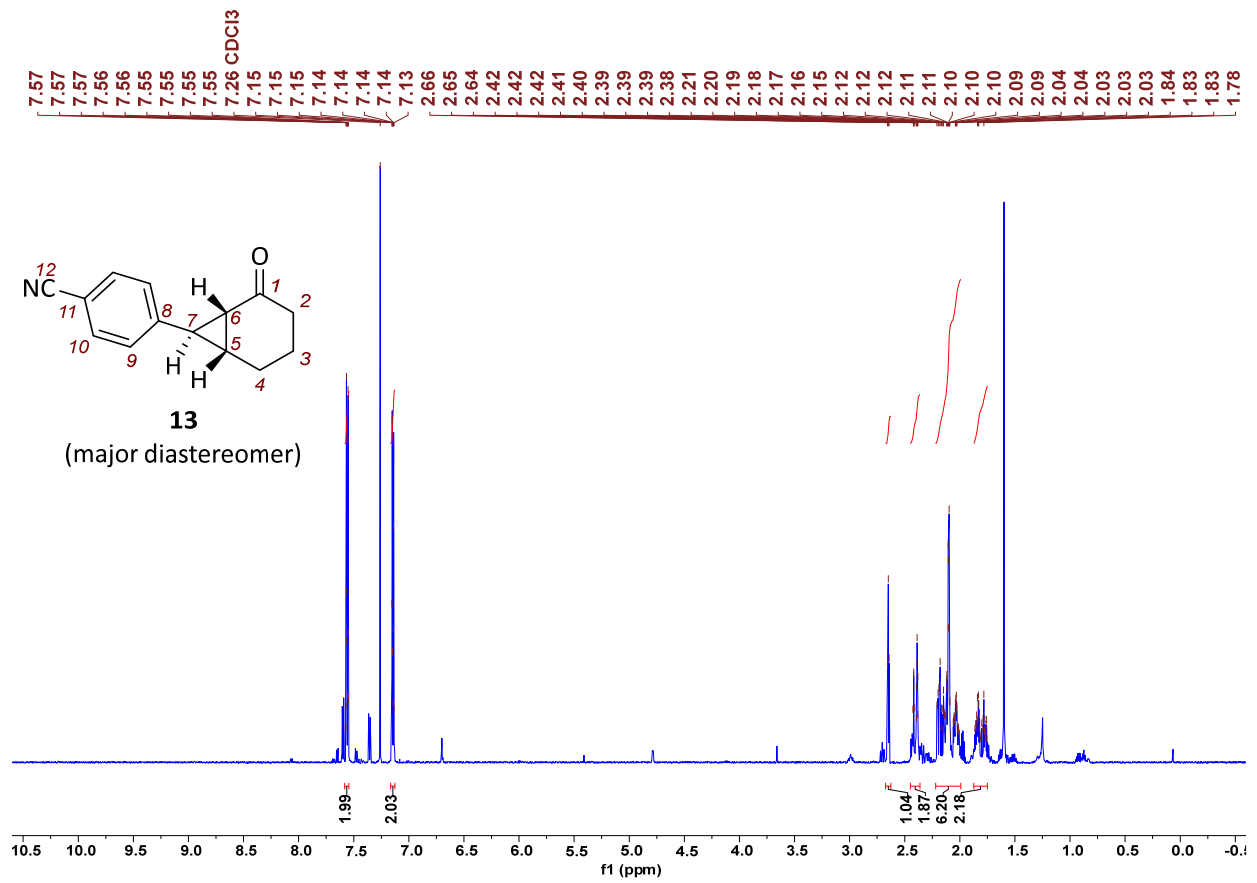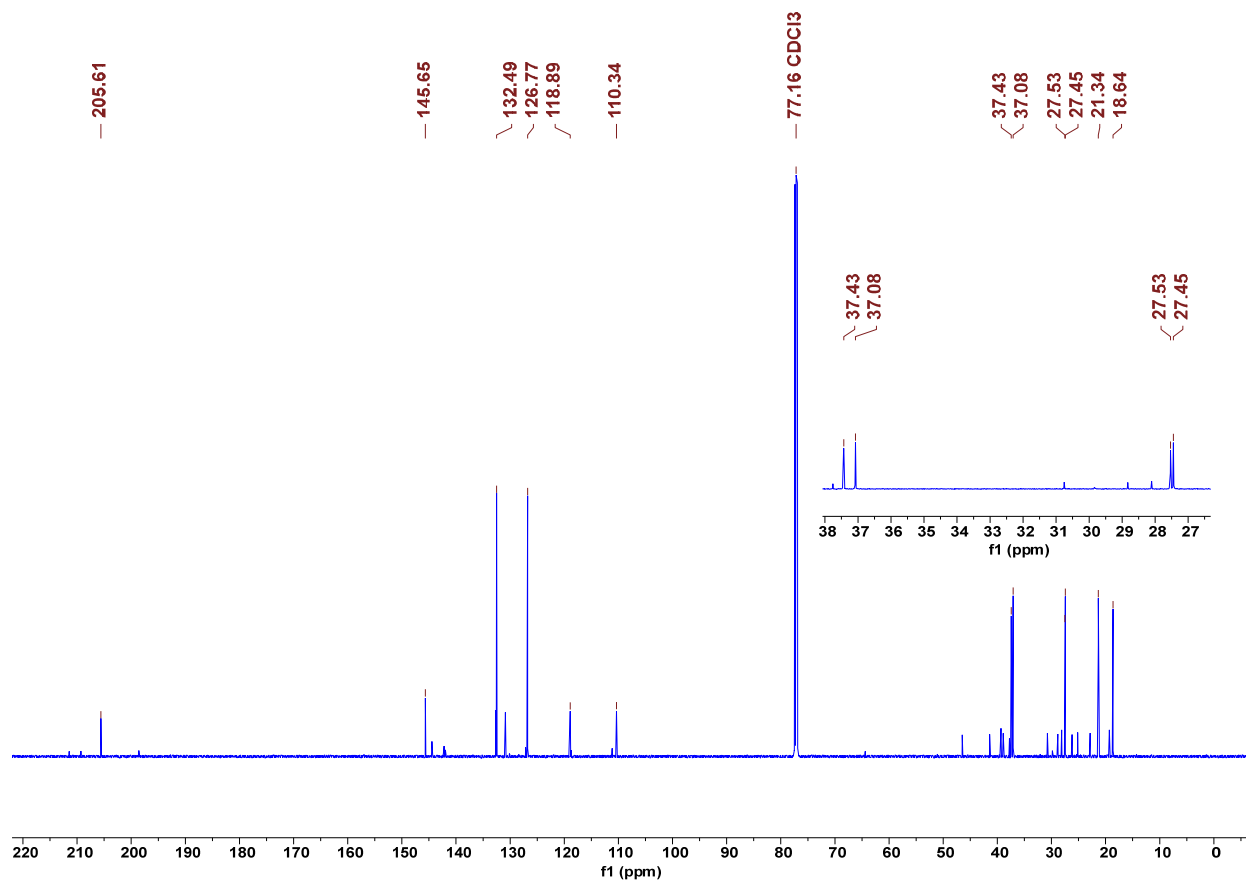

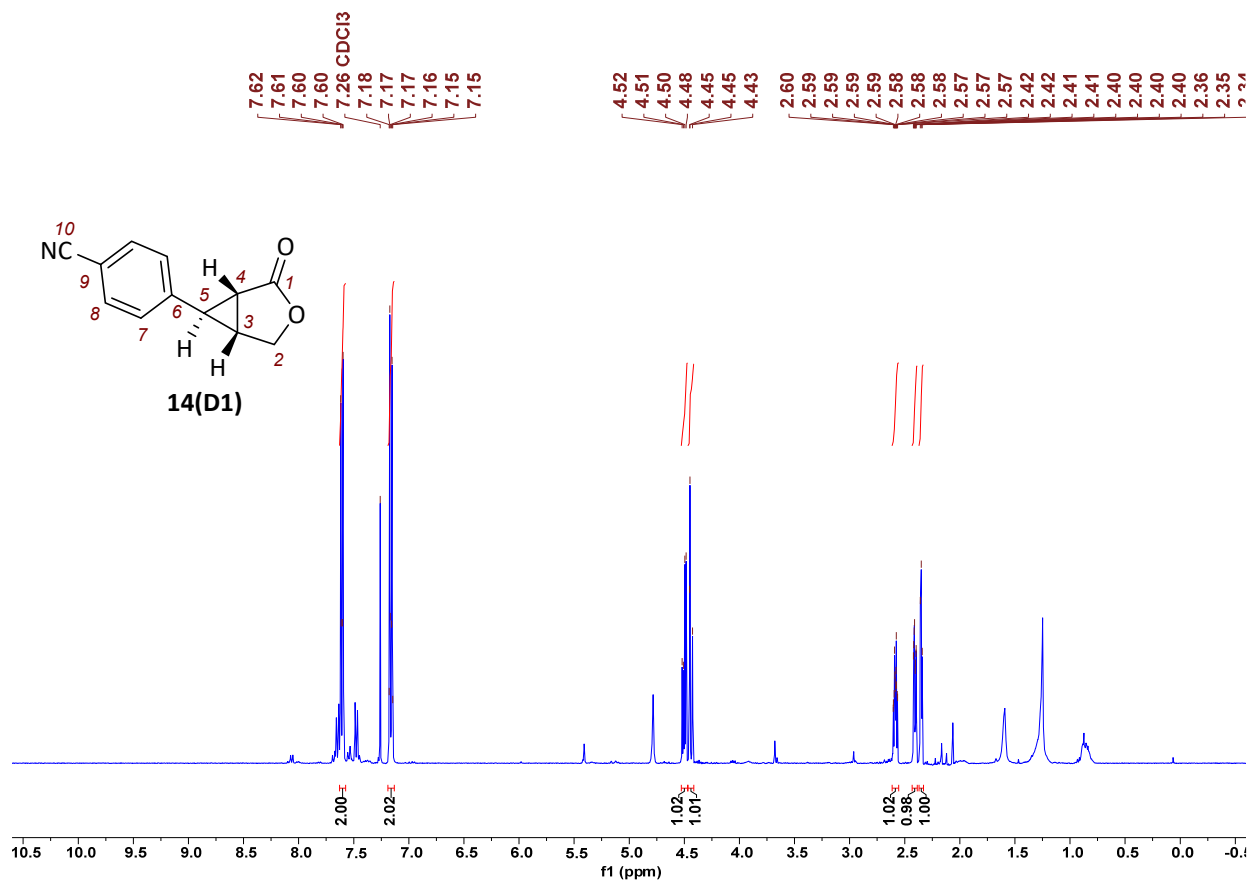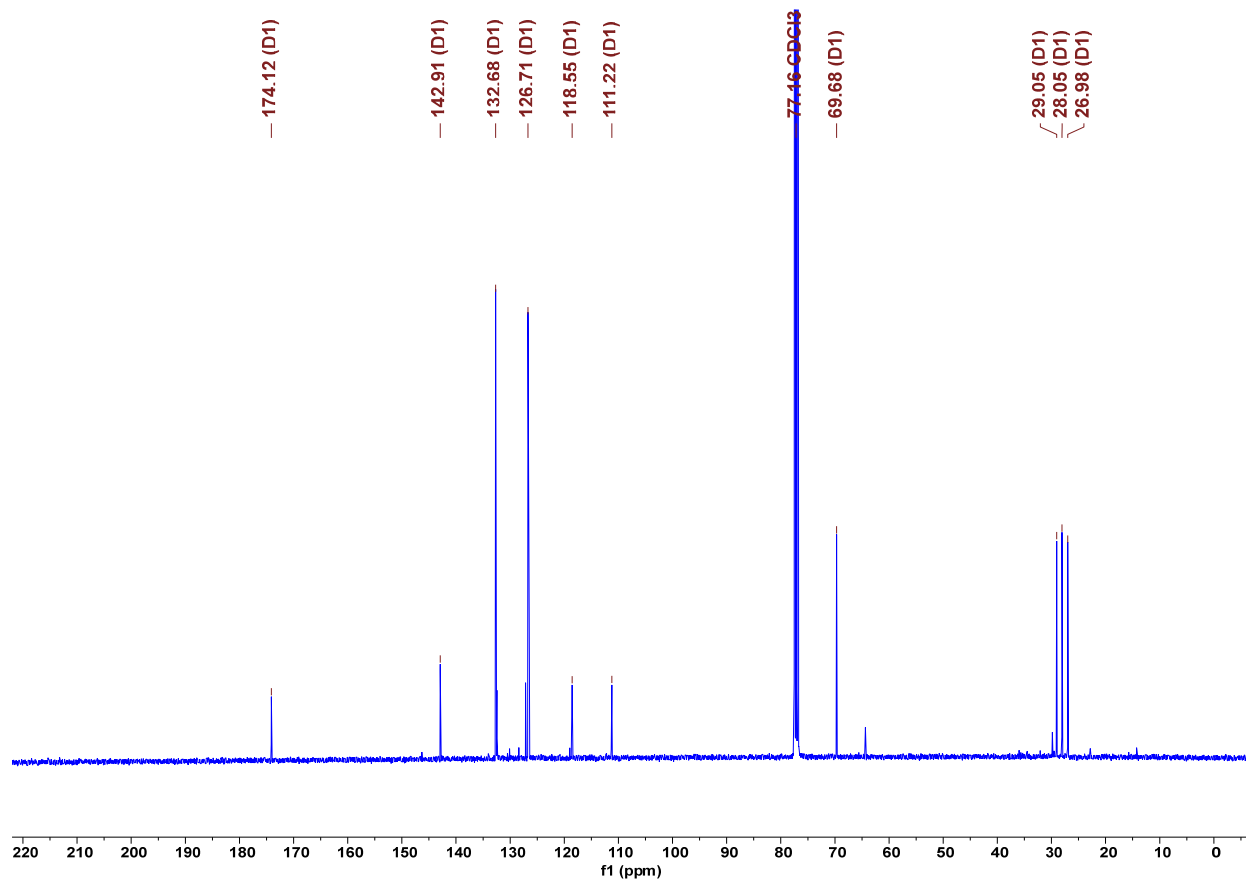

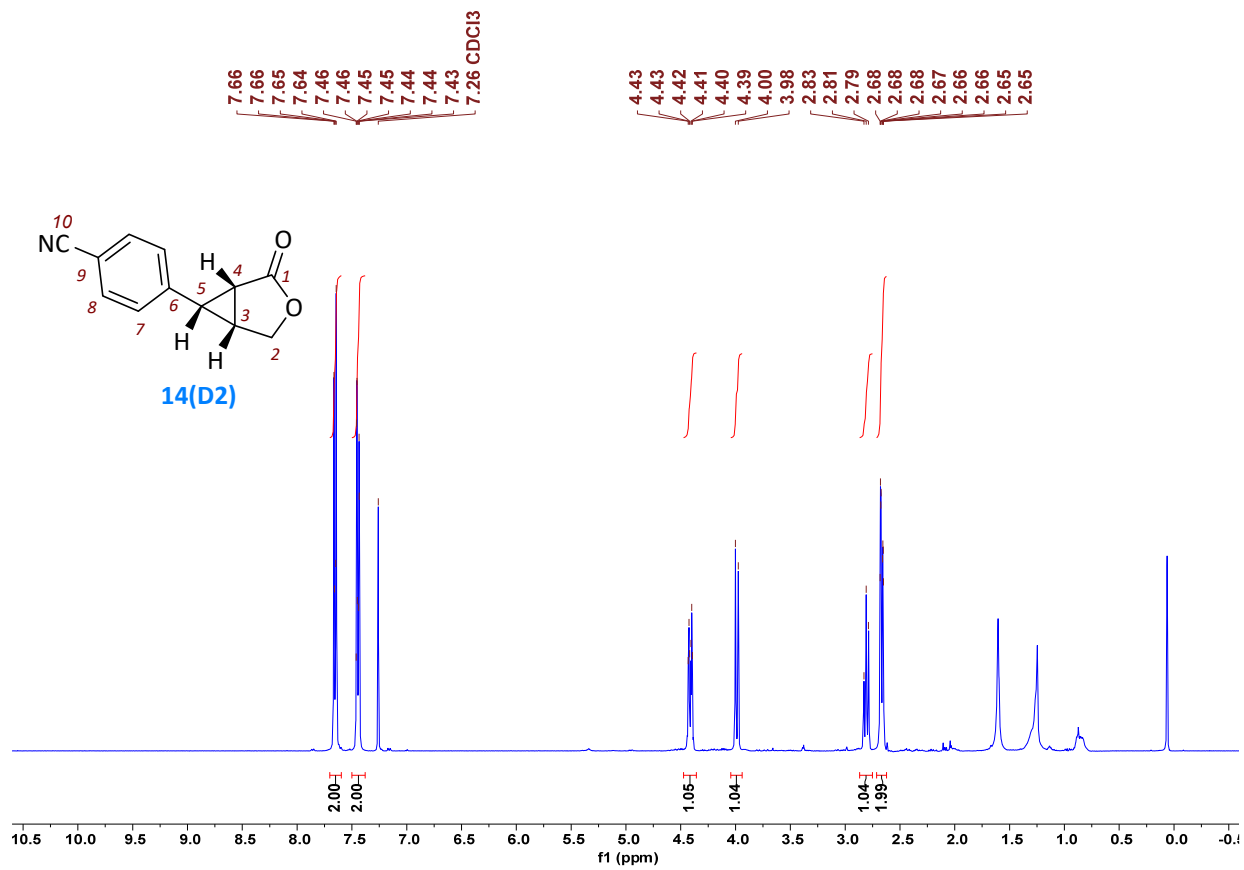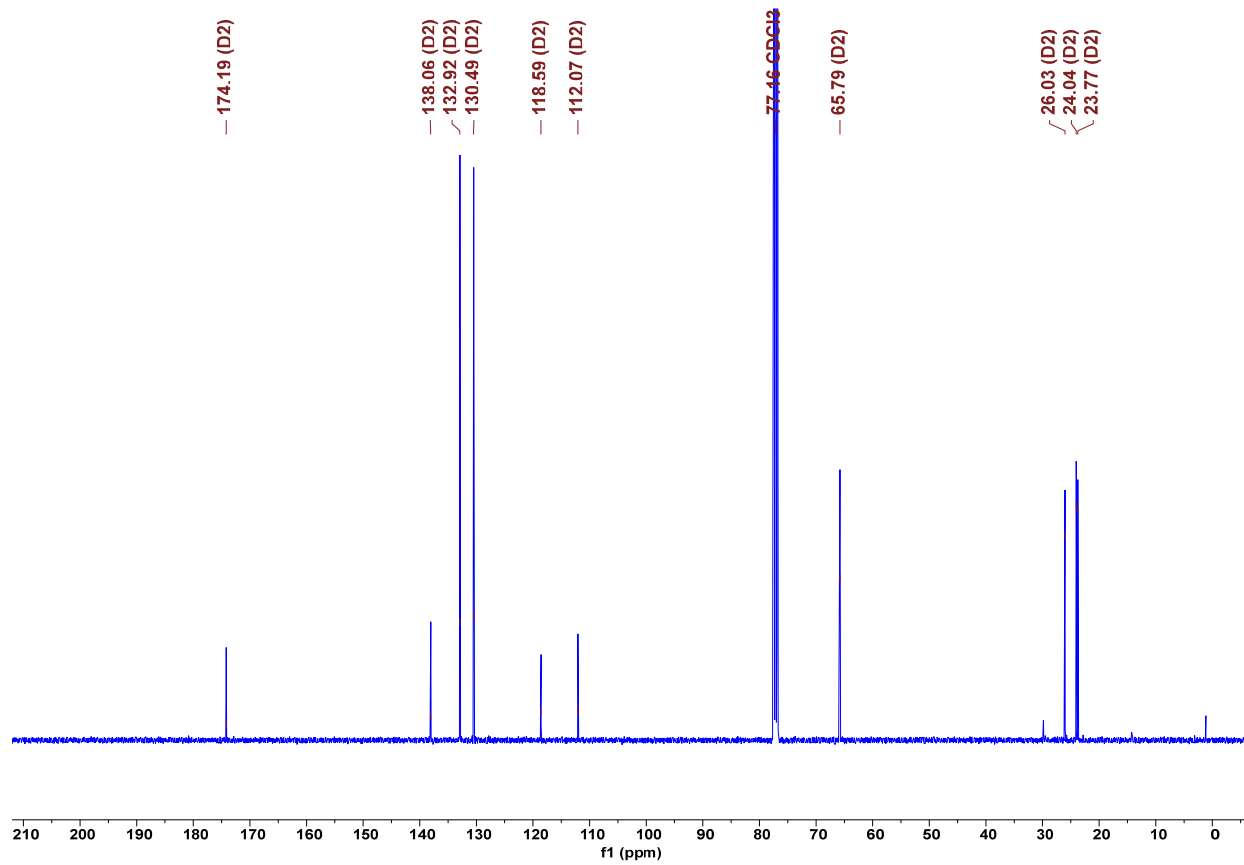

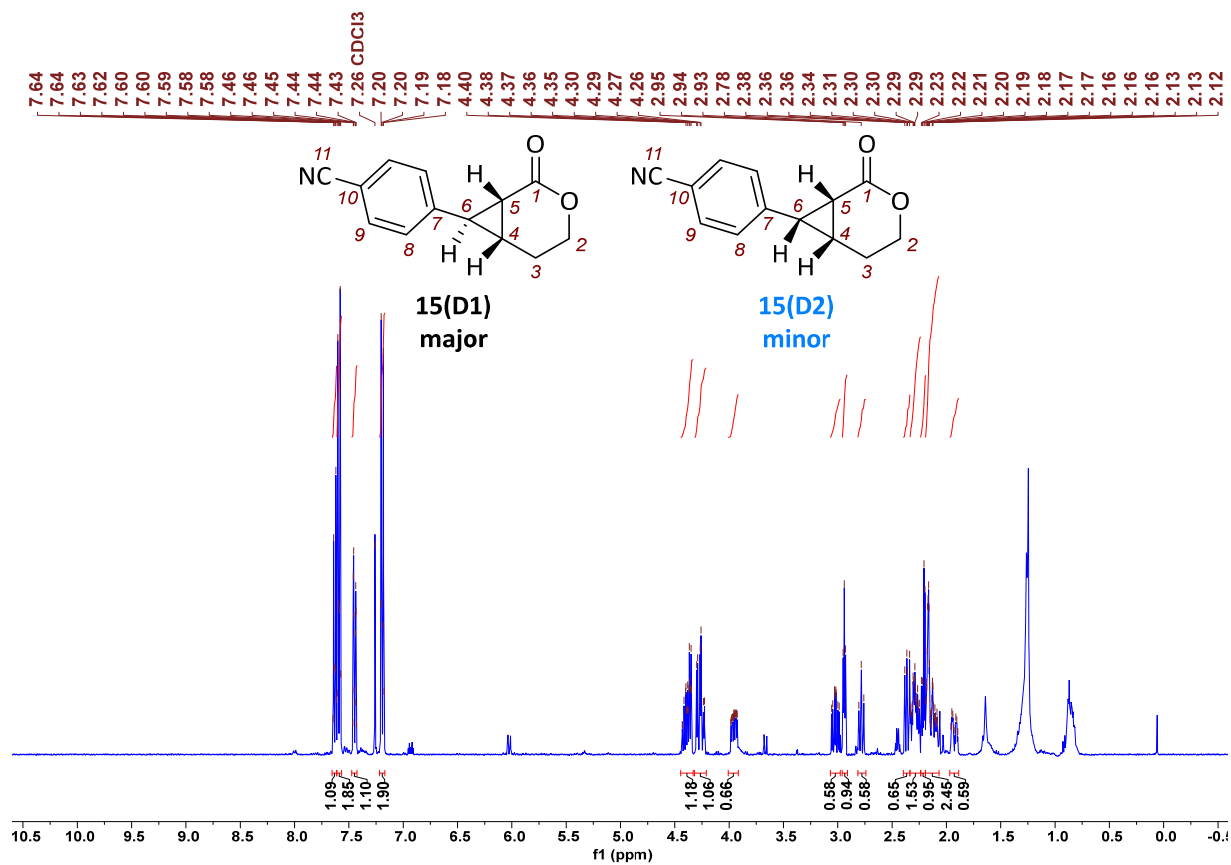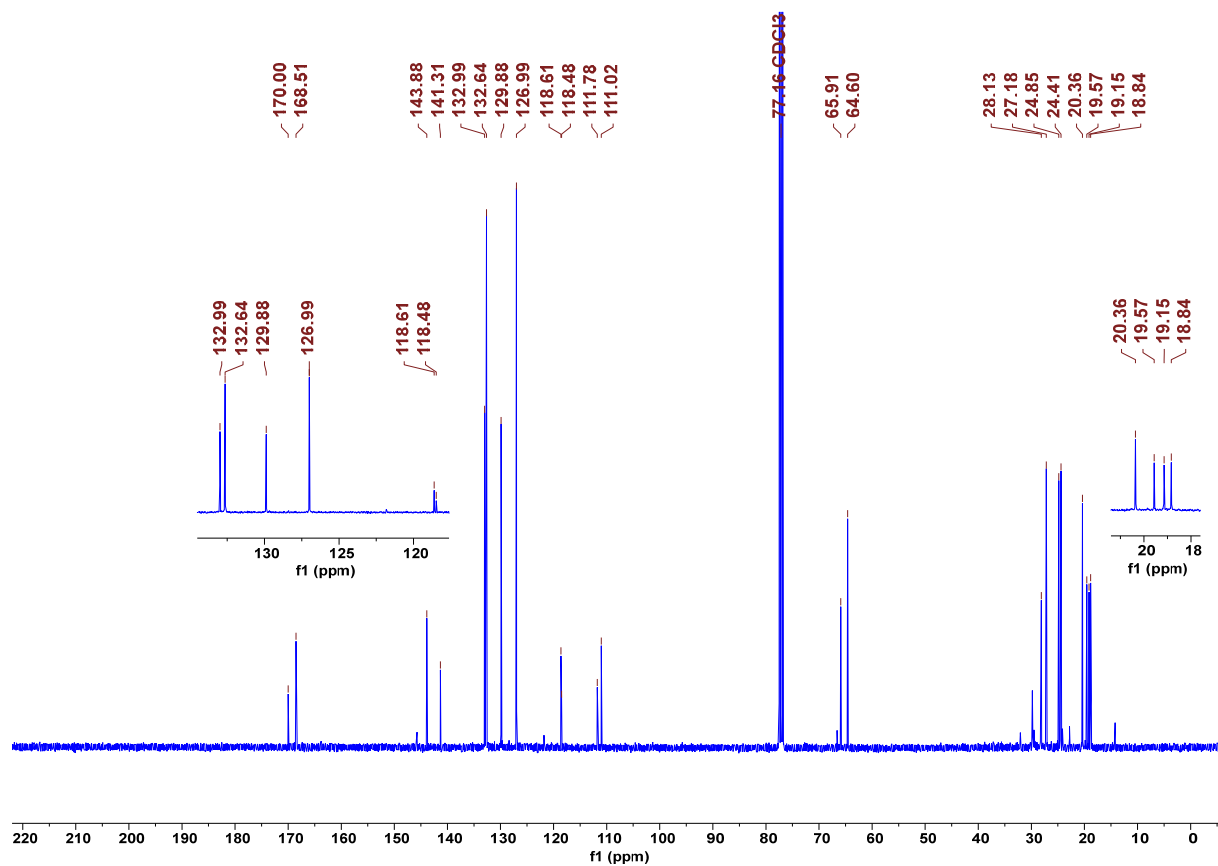



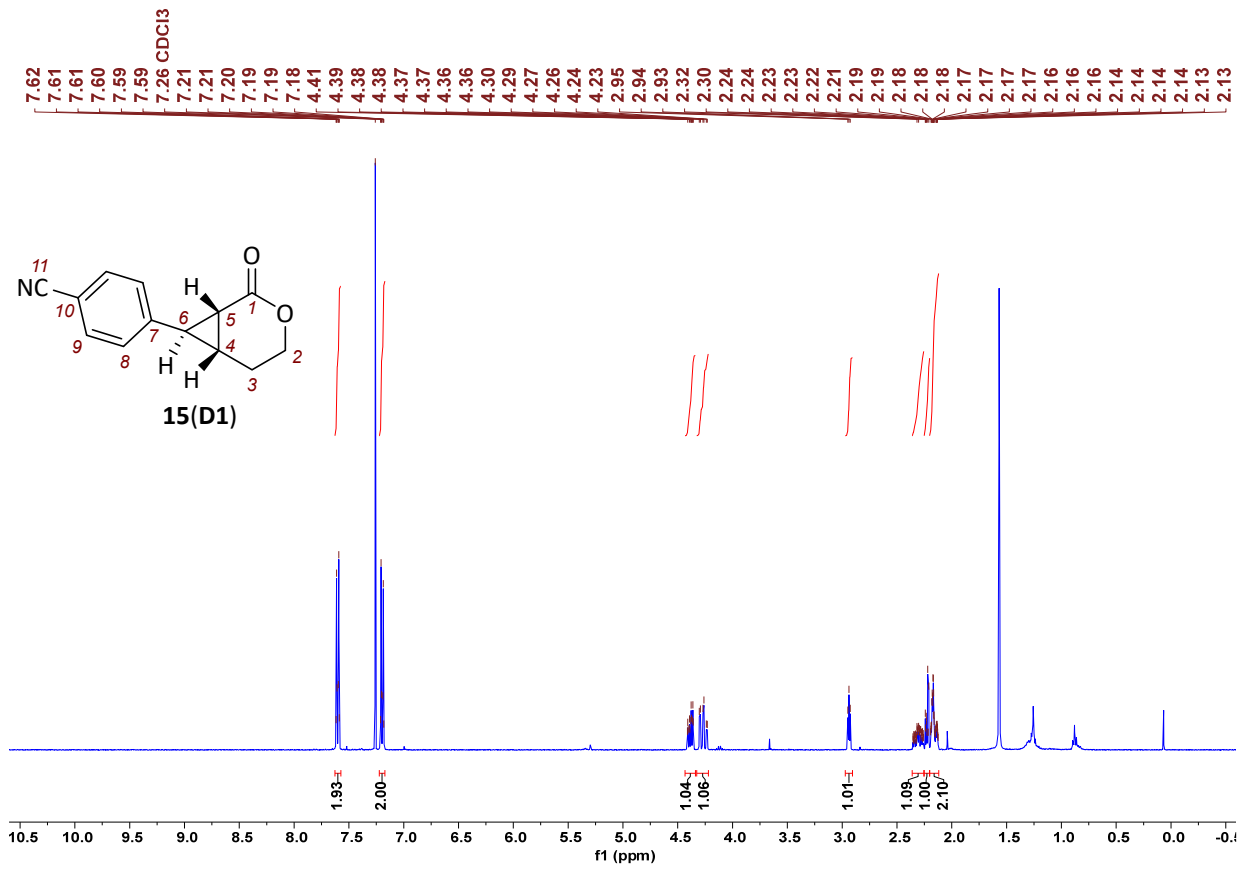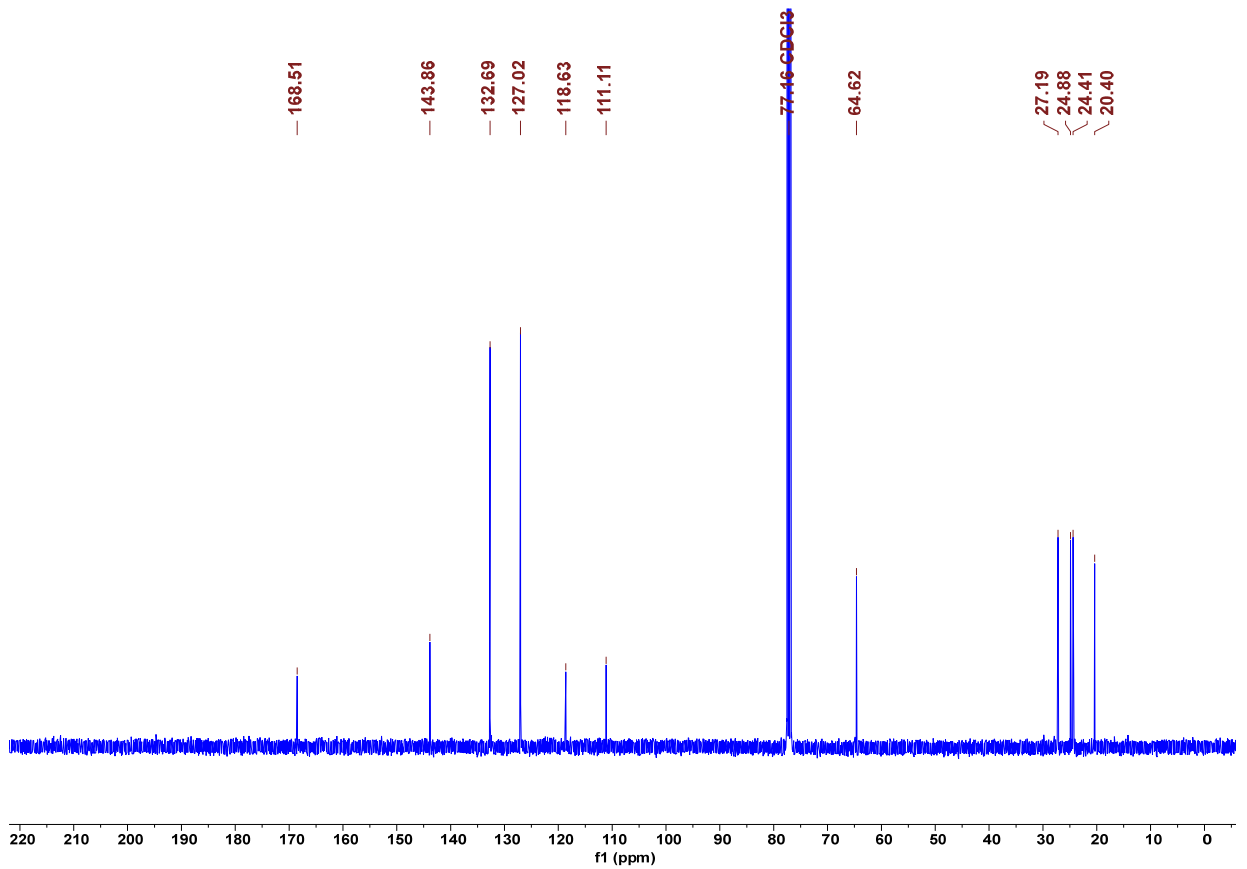

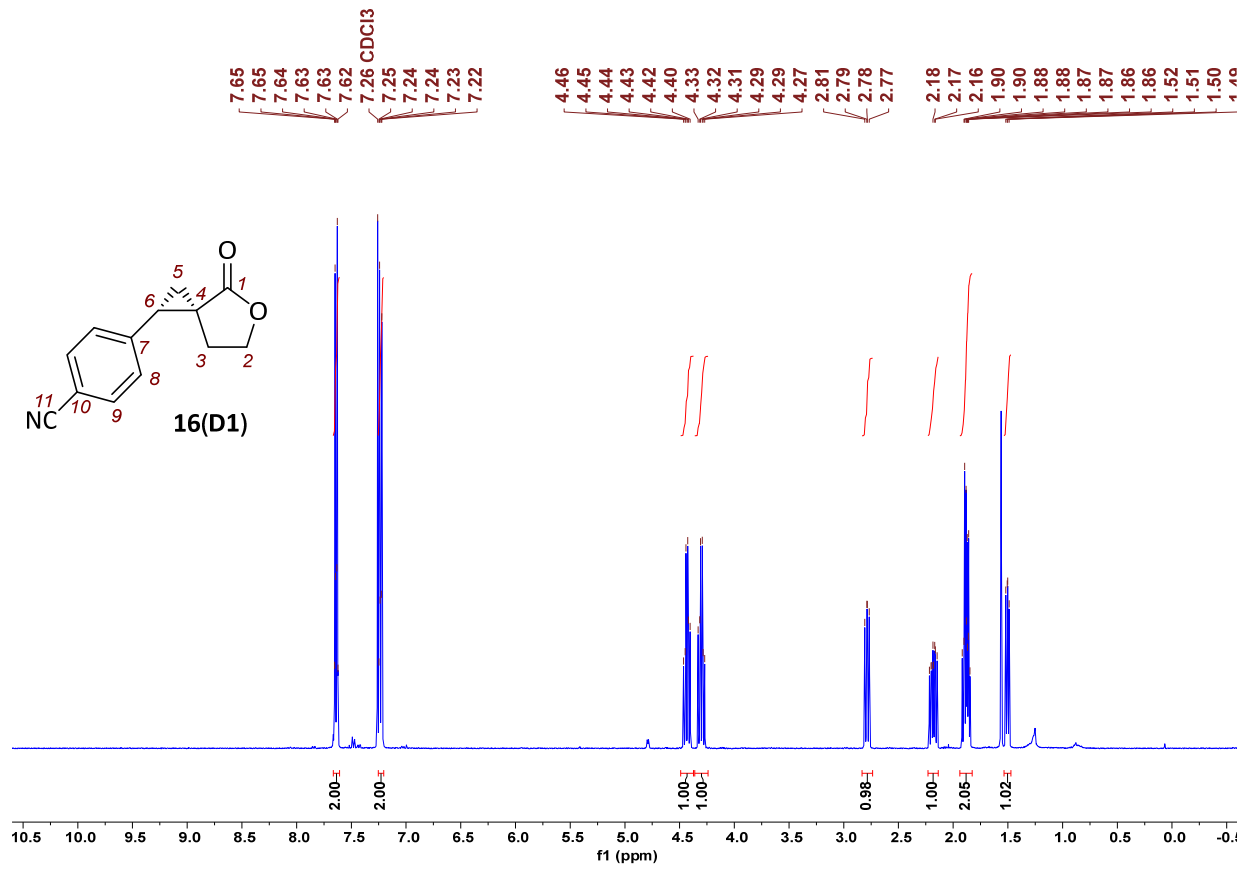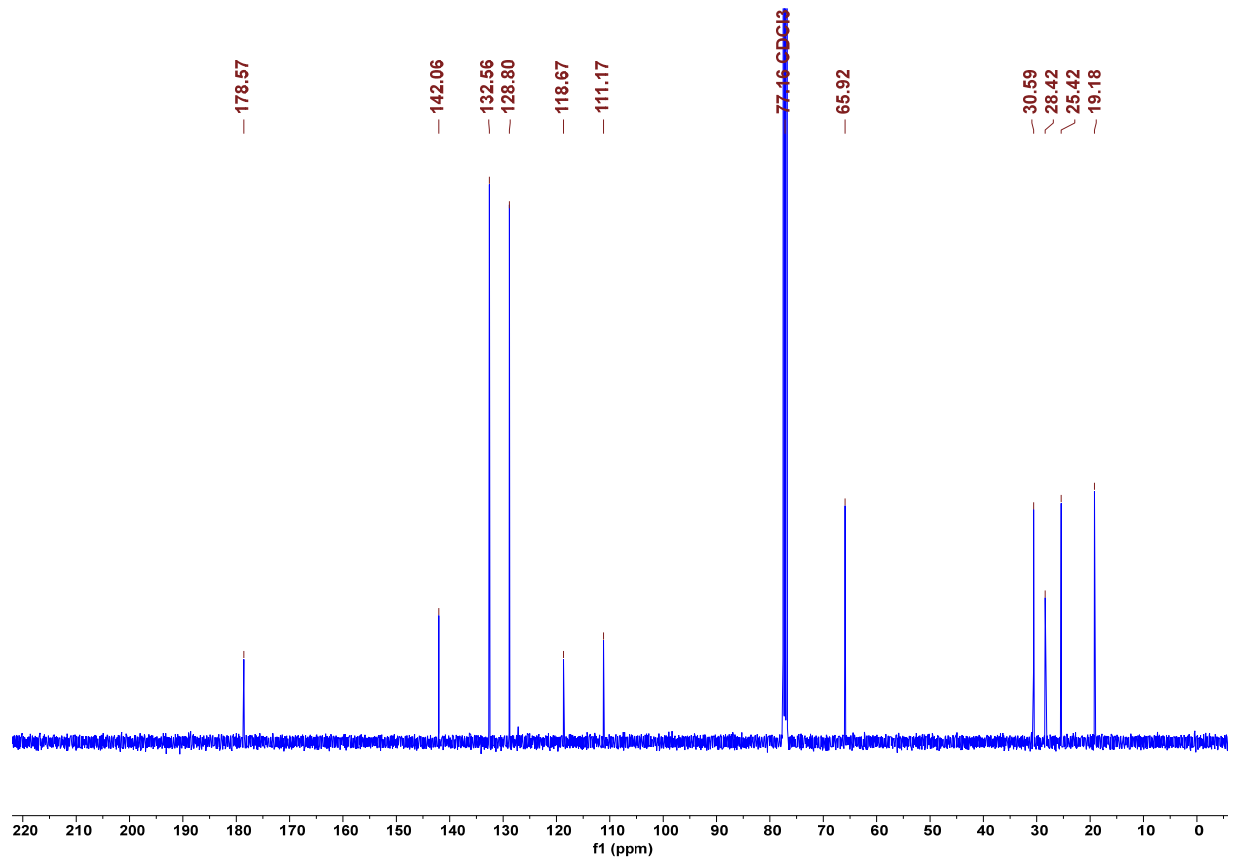

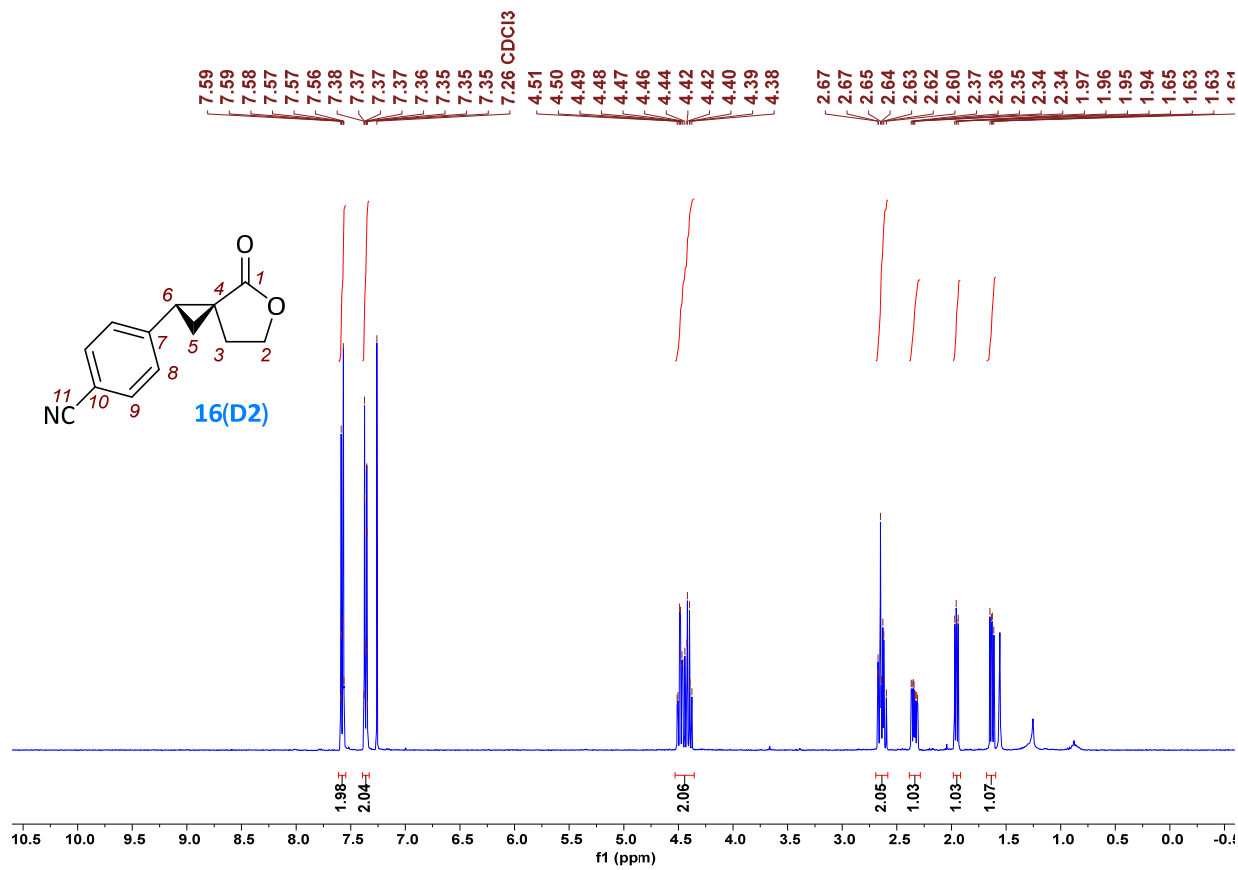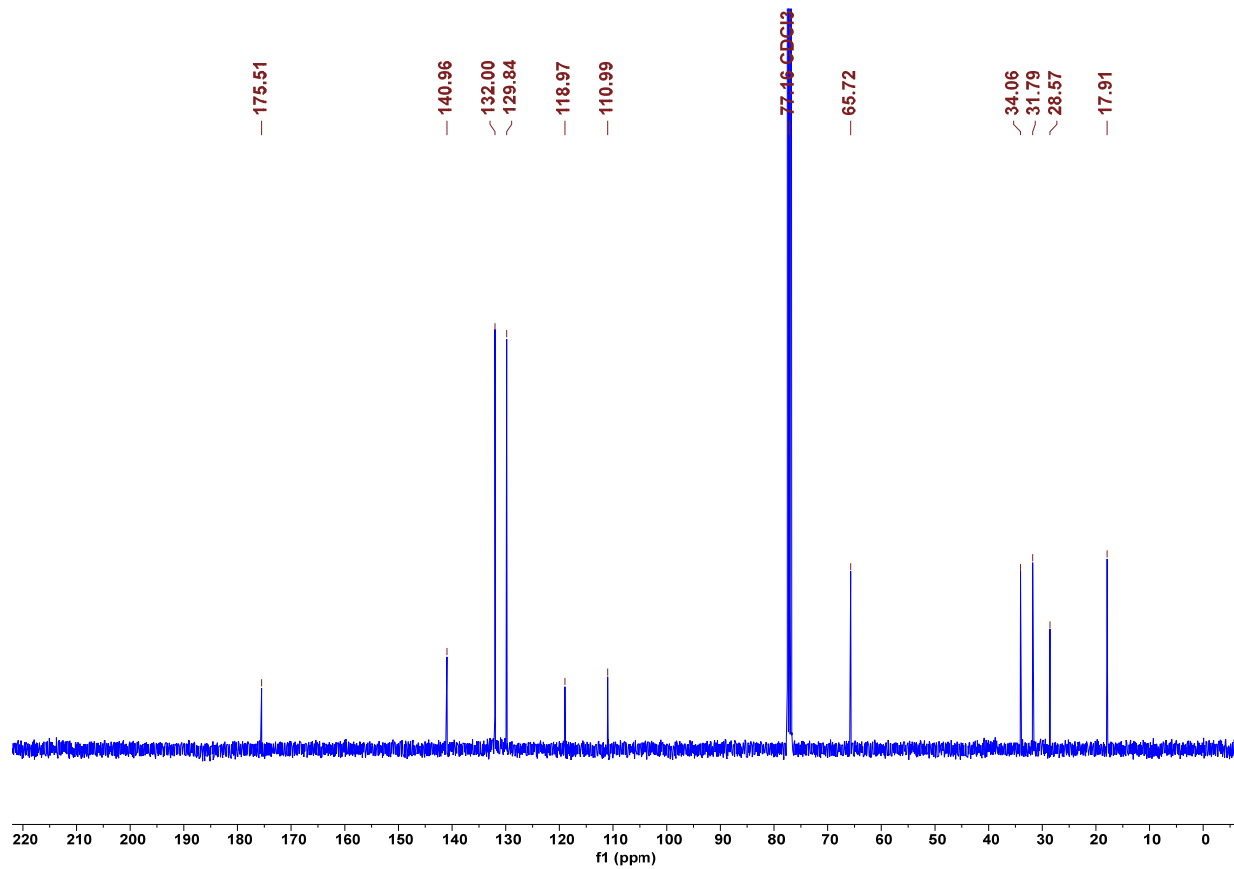

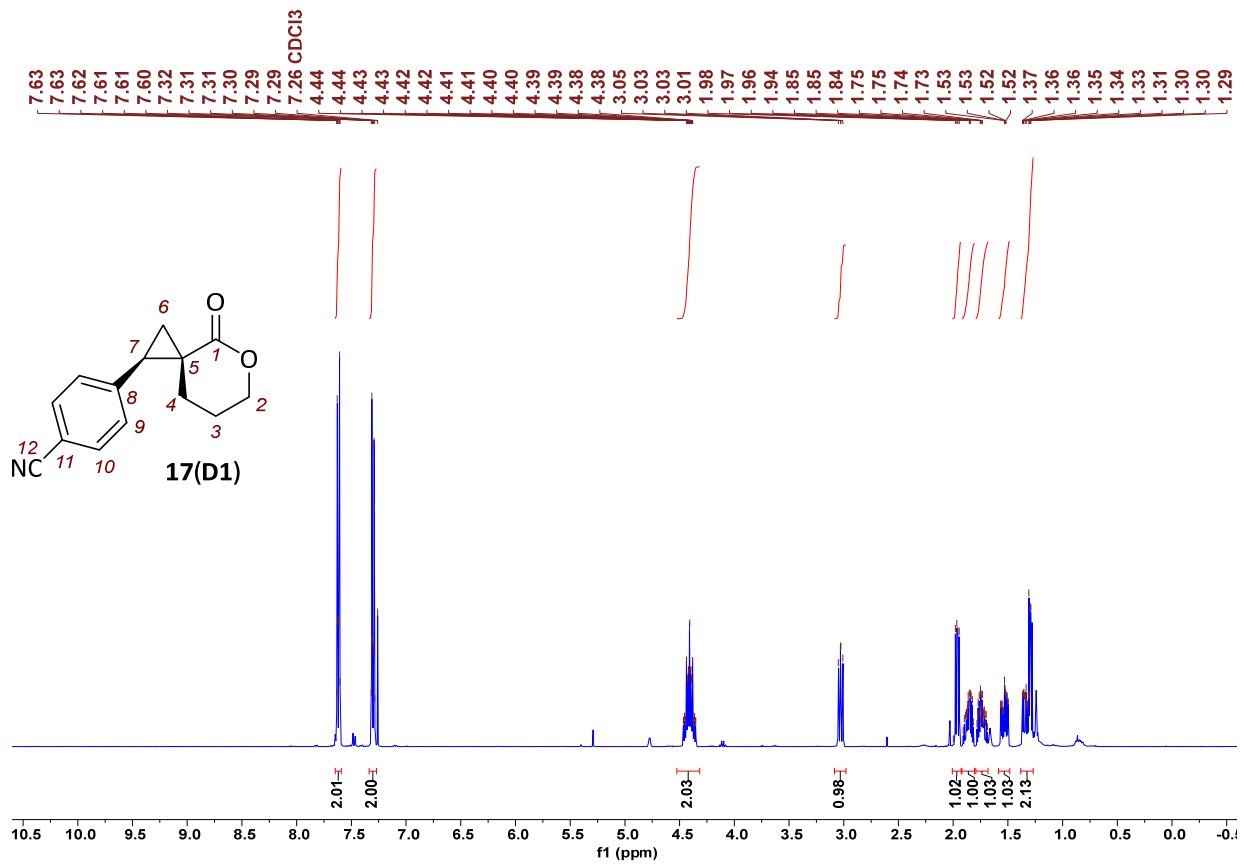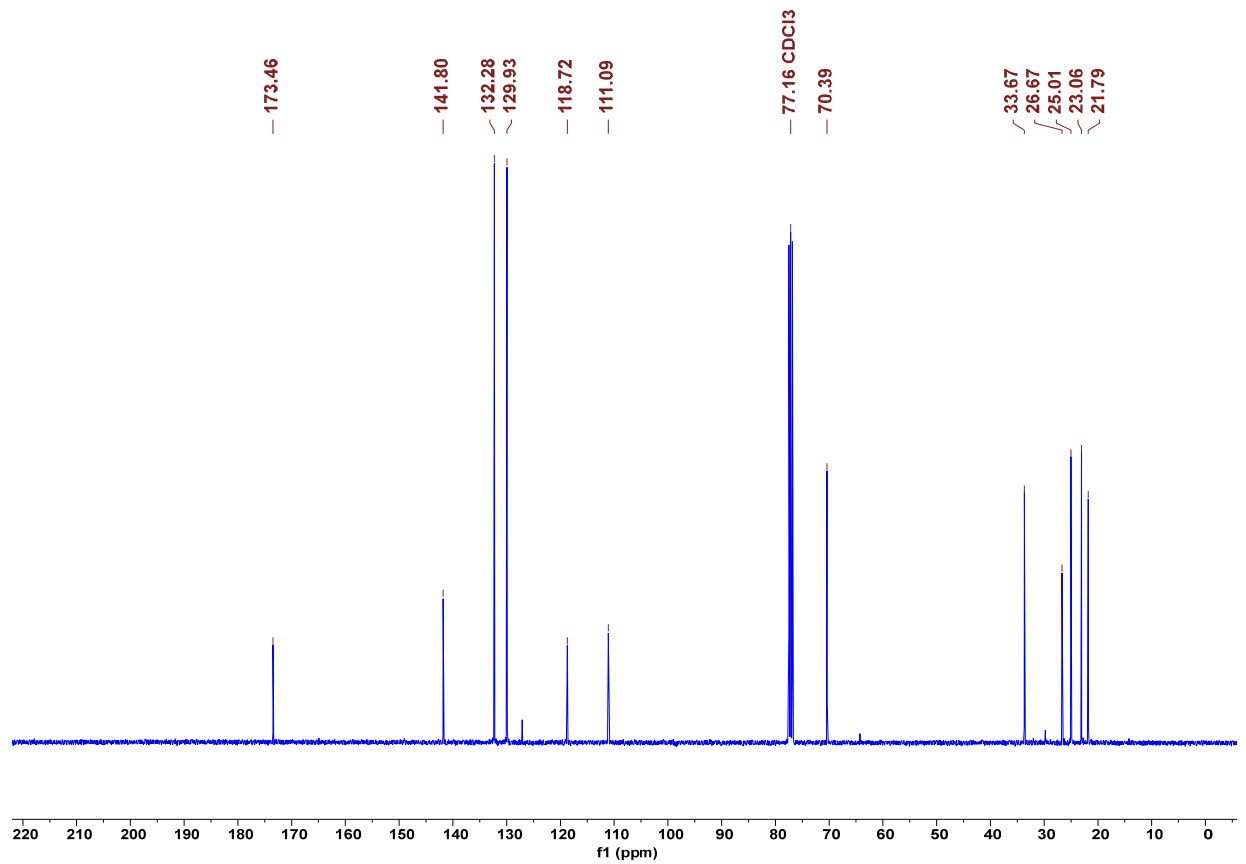

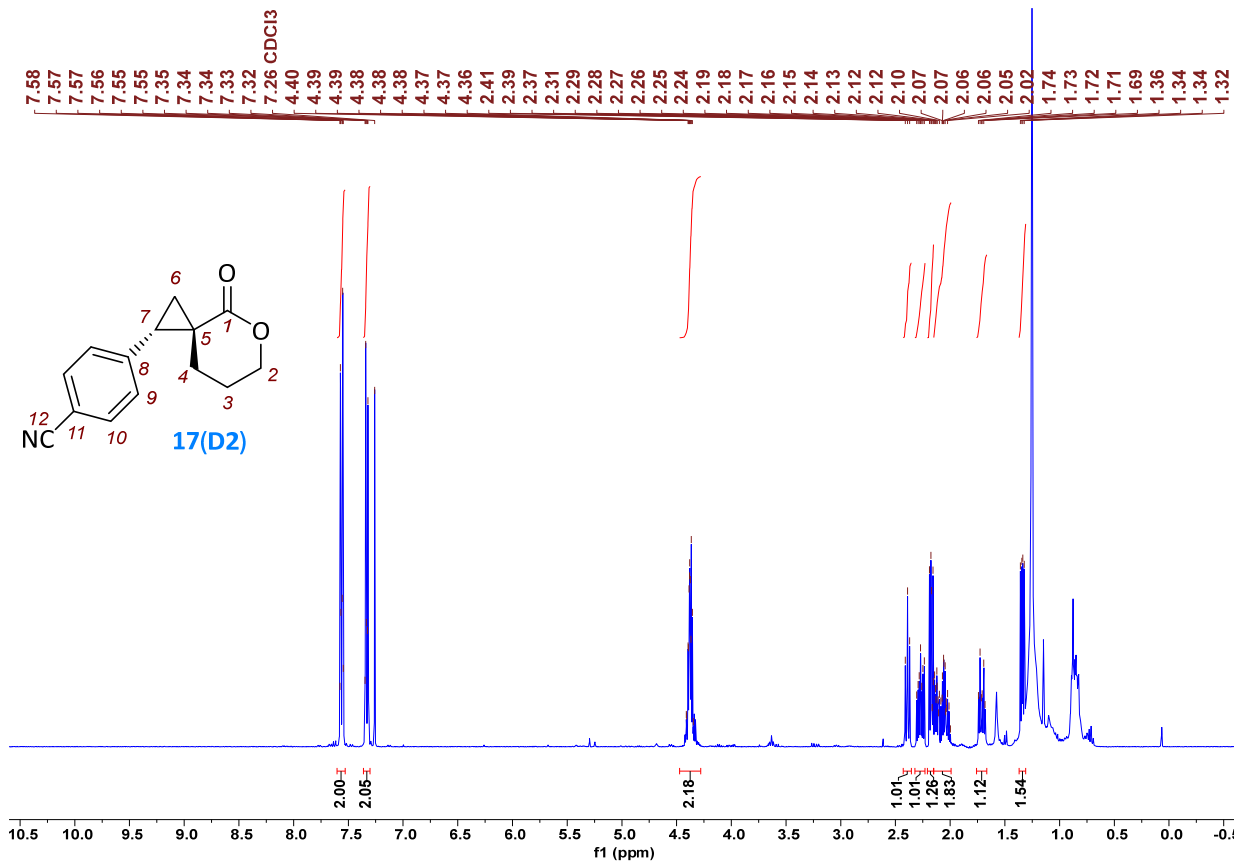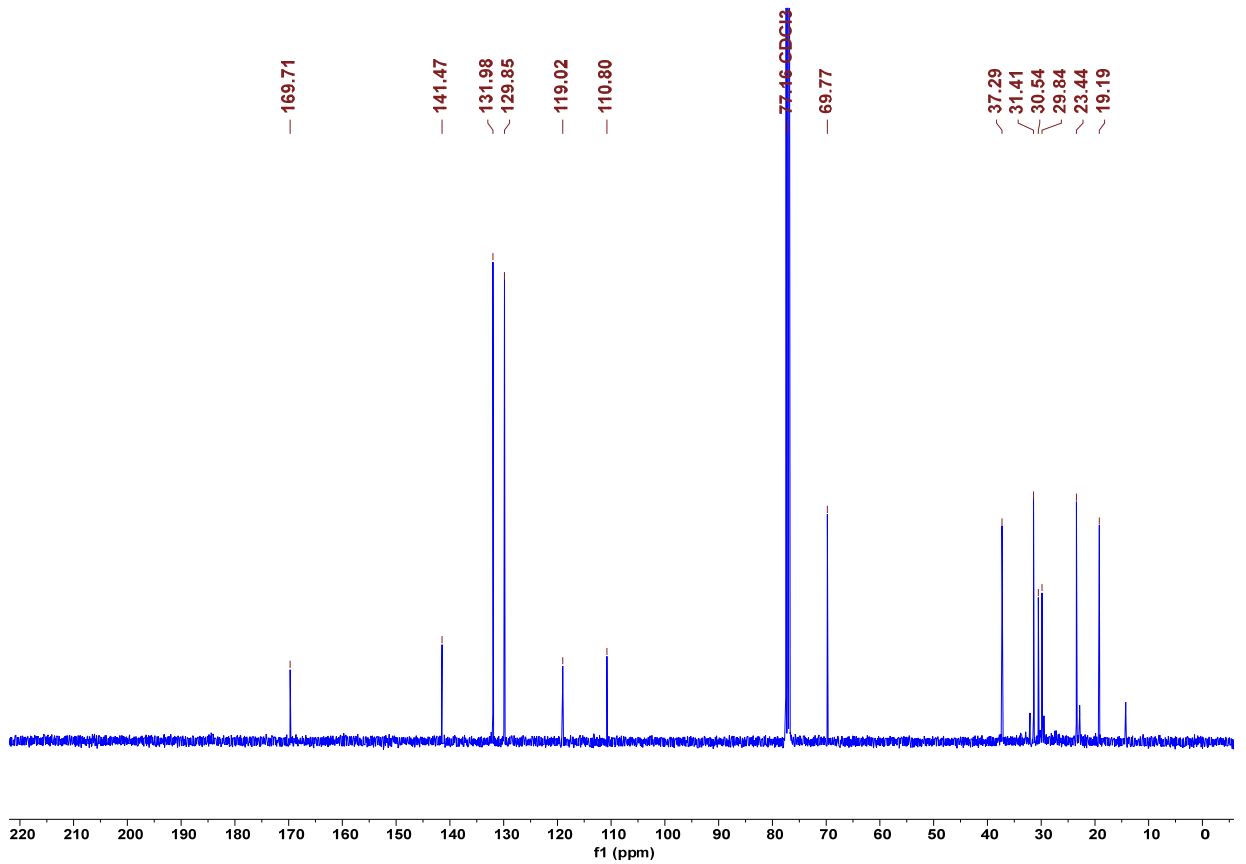

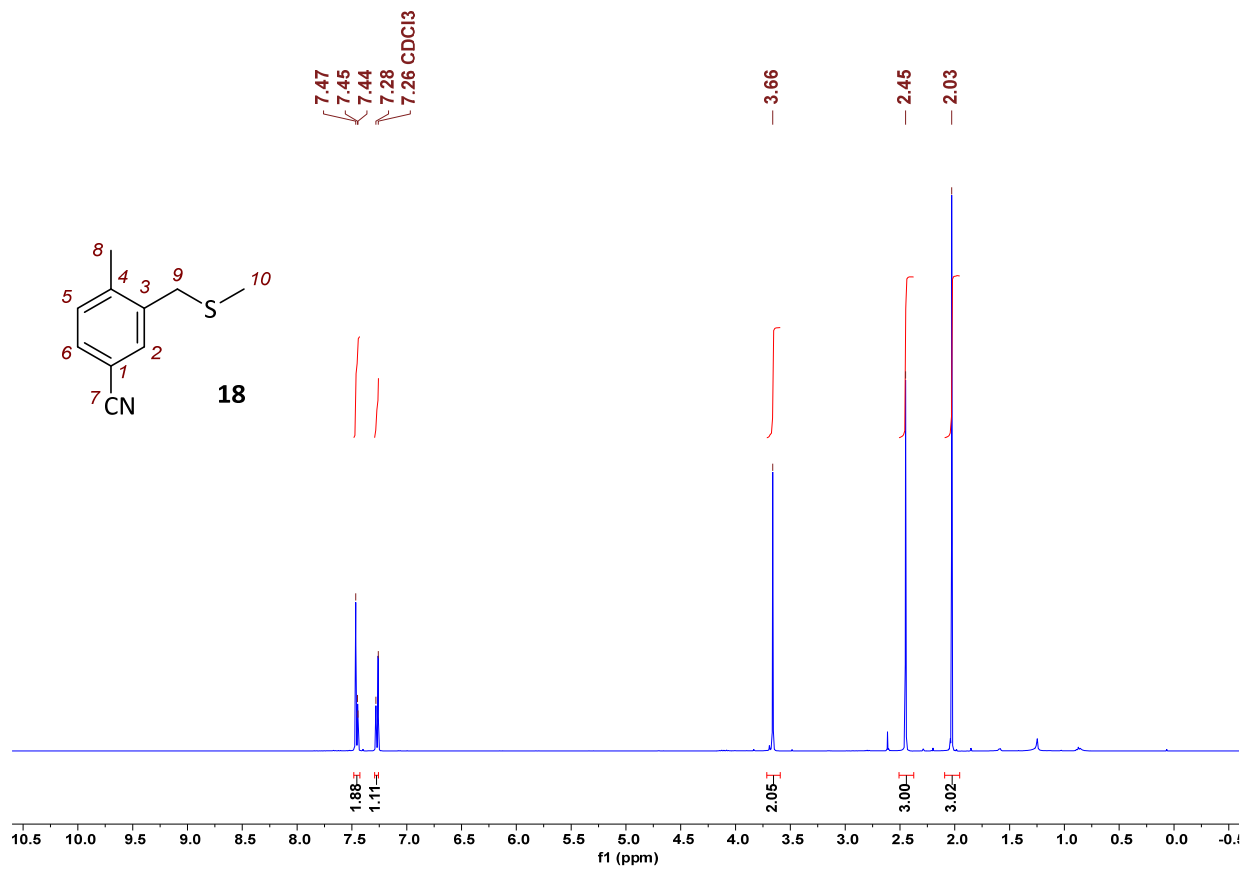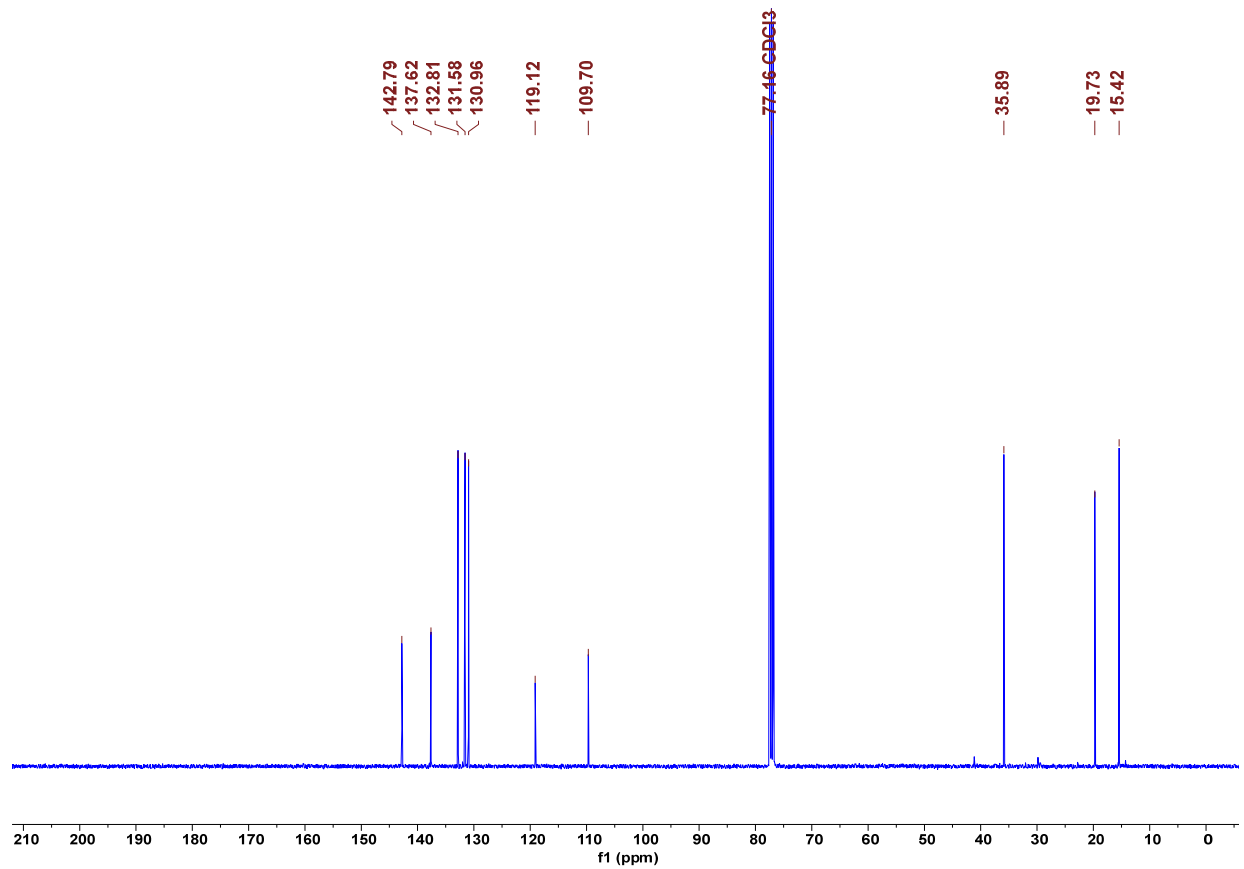

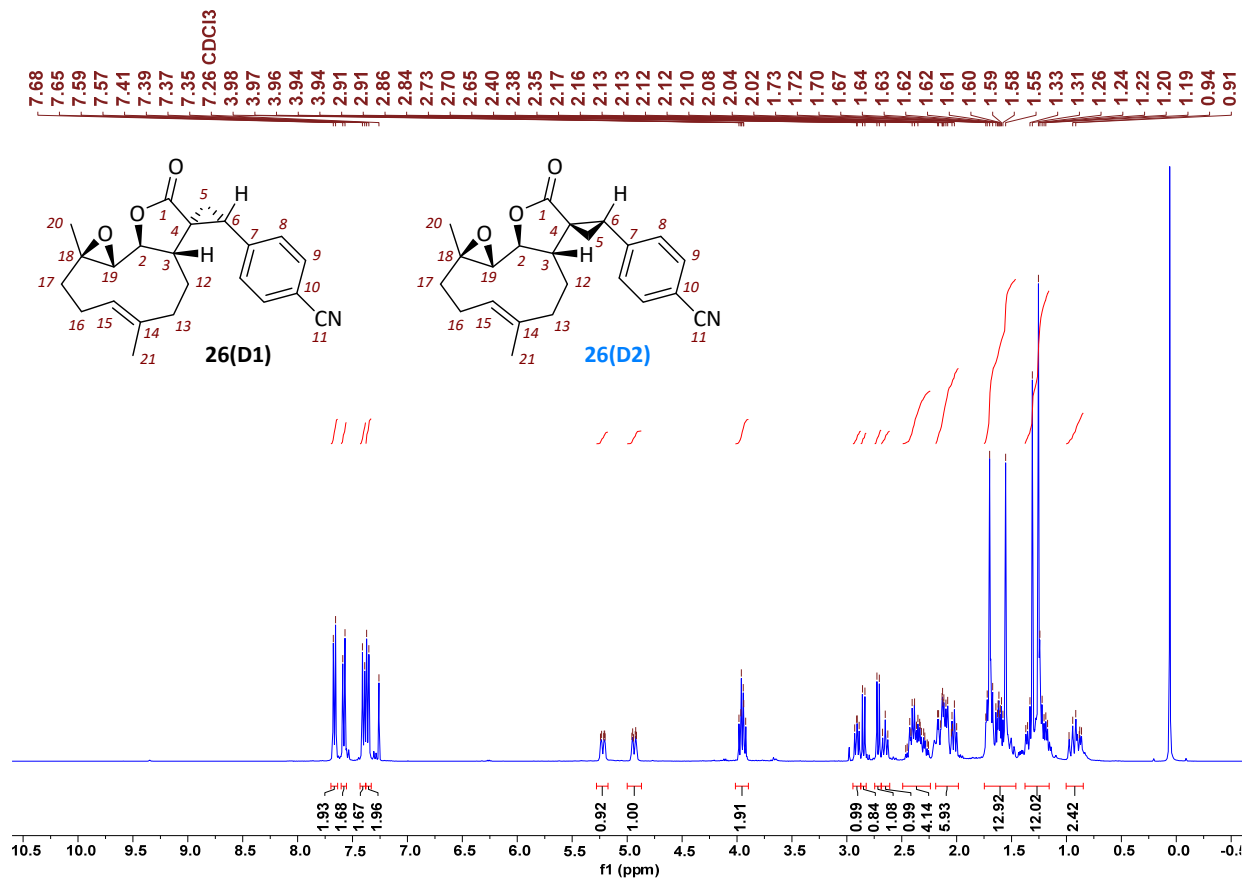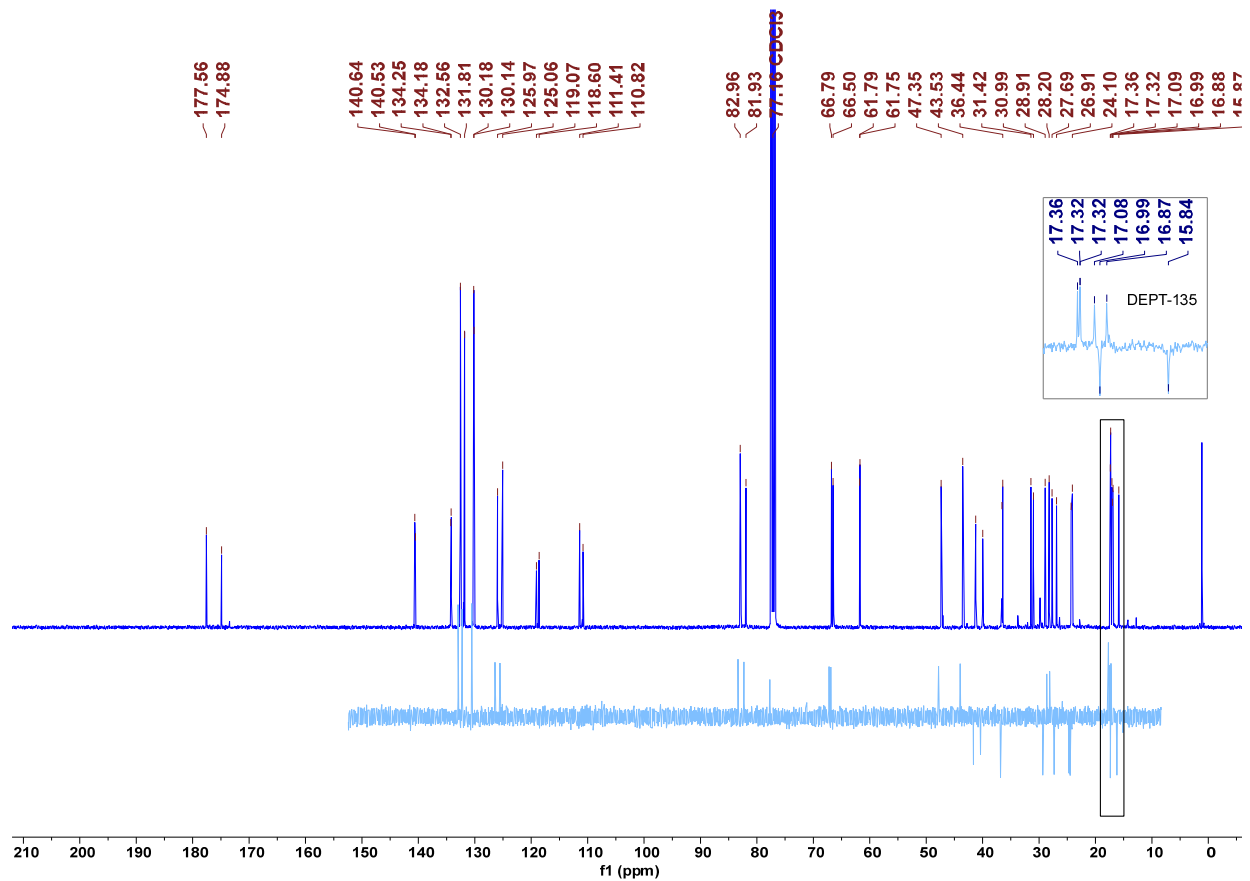

## Geometries of Optimized Structures

Filename (cf. Table S2), cartesian coordinates (in Å), electronic energies (in Hartree), enthalpies (in Hartree), Gibbs free energies (in Hartree), and the number of the imaginary vibrational frequencies (NImag) for all stationary points at the SMD(DMSO)/M06-2X/6-31+G(d,p) level of theory.

1a.log

E = -269.254647

H = -269.150003

G = -269.184822

NImag=0

|   |            |            |            |
|---|------------|------------|------------|
| C | -1.0203441 | 0.1290731  | -0.5485736 |
| C | -0.2196870 | 1.3540136  | -0.1936494 |
| C | 1.2056527  | 0.8232277  | 0.0132978  |
| C | 1.1148917  | -0.6763319 | -0.2400737 |
| C | -0.2884637 | -0.9943957 | -0.5756443 |
| O | 2.0440005  | -1.4638806 | -0.1744684 |
| H | -2.0852381 | 0.1826537  | -0.7569641 |
| H | -0.6289976 | 1.8279859  | 0.7047834  |
| H | -0.2824361 | 2.0947835  | -0.9978192 |
| H | 1.9293794  | 1.2577125  | -0.6825554 |
| H | 1.5814155  | 0.9898885  | 1.0270998  |
| H | -0.6318732 | -1.9973302 | -0.8027328 |

1a\_sy\_c\_1.log

E = -1109.619867

H = -1109.314207

G = -1109.379194

NImag=0

|   |            |           |            |
|---|------------|-----------|------------|
| C | 2.6910487  | 3.5066805 | 0.7322146  |
| C | 1.6315231  | 2.5668680 | 0.2254245  |
| C | 2.6695367  | 3.6834528 | 2.1040234  |
| O | 3.4041492  | 4.4002643 | 2.8557700  |
| C | 0.6476738  | 3.0562902 | -0.8680736 |
| C | 1.1383422  | 2.9715953 | -2.3013709 |
| C | 2.5011281  | 3.0171943 | -2.6142673 |
| C | 2.9232420  | 2.9419197 | -3.9369740 |
| C | 1.9730184  | 2.8230059 | -4.9569119 |
| C | 0.6061138  | 2.7722681 | -4.6598248 |
| C | 0.1998407  | 2.8451277 | -3.3336710 |
| C | 1.5248217  | 2.8504856 | 2.7012745  |
| C | 0.8957416  | 2.0944597 | 1.5218005  |
| S | -0.0474248 | 4.7805634 | -0.7202788 |
| C | -0.3177889 | 5.1183874 | 1.0304997  |
| C | 1.3020390  | 5.9149490 | -1.0971997 |
| C | 2.4069418  | 2.7450085 | -6.3269274 |
| N | 2.7558406  | 2.6828730 | -7.4293936 |
| H | 3.4293757  | 3.9816131 | 0.0923301  |
| H | 2.0545319  | 1.6762322 | -0.2690471 |
| H | -0.2756709 | 2.4674024 | -0.8019991 |
| H | 3.2435746  | 3.1058843 | -1.8287320 |
| H | 3.9802295  | 2.9742896 | -4.1795003 |
| H | -0.1224534 | 2.6701974 | -5.4570915 |
| H | -0.8601179 | 2.7931016 | -3.0982569 |
| H | 1.9269576  | 2.1748537 | 3.4647354  |
| H | 0.8155961  | 3.5149532 | 3.2132604  |
| H | -0.1840221 | 2.2612681 | 1.4507208  |
| H | 1.0301507  | 1.0148060 | 1.6319300  |
| H | -0.7366123 | 6.1264812 | 1.0731503  |



|   |            |           |            |
|---|------------|-----------|------------|
| H | -1.0501169 | 4.4028102 | 1.4062342  |
| H | 0.6284164  | 5.0616270 | 1.5662723  |
| H | 0.8814863  | 6.9182220 | -0.9970380 |
| H | 1.6029496  | 5.7479083 | -2.1326146 |
| H | 2.1277374  | 5.7553562 | -0.4053684 |

1a\_sy\_c\_1\_r.log

E = -1109.619199

H = -1109.313354

G = -1109.377575

NImag=0

|   |            |            |            |
|---|------------|------------|------------|
| C | -0.6483422 | -1.9312622 | -0.4576022 |
| C | -1.3709077 | -0.7347737 | -1.0161392 |
| C | -1.2651490 | -2.4713529 | 0.6597322  |
| O | -0.9210691 | -3.4377244 | 1.4095567  |
| C | -0.4687702 | 0.5170325  | -0.8491401 |
| C | 0.0451344  | 0.8711706  | 0.5290163  |
| C | -0.8034924 | 1.0723800  | 1.6256483  |
| C | -0.2822123 | 1.3728340  | 2.8777088  |
| C | 1.1039486  | 1.4833732  | 3.0389262  |
| C | 1.9660310  | 1.2965603  | 1.9538050  |
| C | 1.4283700  | 0.9934132  | 0.7085668  |
| C | -2.5608878 | -1.6890288 | 0.9331718  |
| C | -2.7406232 | -0.7682356 | -0.2835228 |
| S | -1.0774095 | 2.1055878  | -1.6592038 |
| C | -2.2295485 | 1.5535495  | -2.9334855 |
| C | -2.2025204 | 2.9449982  | -0.5261290 |
| C | 1.6462665  | 1.7984056  | 4.3340780  |
| N | 2.0829627  | 2.0536542  | 5.3758193  |
| H | 0.3062821  | -2.2710052 | -0.8524519 |
| H | -1.5337850 | -0.8111307 | -2.0980754 |
| H | 0.4062130  | 0.3385674  | -1.4842197 |
| H | -1.8794719 | 1.0025391  | 1.5160789  |
| H | -0.9422046 | 1.5241191  | 3.7253956  |
| H | 3.0390943  | 1.3841452  | 2.0868688  |
| H | 2.0942020  | 0.8383293  | -0.1355958 |
| H | -3.4006617 | -2.3812595 | 1.0596733  |
| H | -2.4572354 | -1.1412199 | 1.8787200  |
| H | -3.1238534 | 0.2232783  | -0.0259096 |
| H | -3.4683877 | -1.2084793 | -0.9728269 |
| H | -2.6046336 | 2.4581579  | -3.4164627 |
| H | -1.6732969 | 0.9544977  | -3.6559493 |
| H | -3.0467530 | 0.9849107  | -2.4874272 |
| H | -2.6297937 | 3.7696856  | -1.1016955 |
| H | -1.6151898 | 3.3465367  | 0.2998217  |
| H | -2.9886880 | 2.2772994  | -0.1749635 |

1a\_sy\_c\_1\_ts1.log

E = -1109.594532

H = -1109.292116

G = -1109.357683

NImag=1

|   |            |            |            |
|---|------------|------------|------------|
| C | -2.9258991 | -0.5828908 | 0.8577836  |
| C | -1.5541670 | -0.6376377 | 1.0908991  |
| C | -3.3493363 | -1.7150809 | 0.0844580  |
| O | -4.4852695 | -1.9832566 | -0.3308433 |
| C | -0.4556054 | 0.4901510  | -0.4608850 |
| C | 0.9665075  | 0.2783080  | -0.3489145 |
| C | 1.7825541  | 1.0311335  | 0.5318668  |
| C | 3.1333956  | 0.7608785  | 0.6727937  |

|   |            |            |            |
|---|------------|------------|------------|
| C | 3.7202488  | -0.2884107 | -0.0517284 |
| C | 2.9288021  | -1.0608750 | -0.9222442 |
| C | 1.5838465  | -0.7793846 | -1.0650753 |
| C | -2.1204269 | -2.5861453 | -0.1807990 |
| C | -1.0533823 | -2.0327687 | 0.7690100  |
| S | -0.9400191 | 2.1923214  | -0.3922609 |
| C | -2.4458628 | 2.1937150  | -1.3825133 |
| C | -1.6307766 | 2.5731045  | 1.2435888  |
| C | 5.1141872  | -0.5726665 | 0.0968851  |
| N | 6.2456186  | -0.8033840 | 0.2165953  |
| H | -3.6014053 | 0.2169819  | 1.1389212  |
| H | -1.0499656 | -0.0521283 | 1.8552121  |
| H | -0.9571549 | 0.0095069  | -1.2982468 |
| H | 1.3534157  | 1.8354536  | 1.1248774  |
| H | 3.7401768  | 1.3539288  | 1.3501805  |
| H | 3.3816357  | -1.8695835 | -1.4876516 |
| H | 0.9829111  | -1.3718001 | -1.7502122 |
| H | -2.3491310 | -3.6452865 | -0.0361409 |
| H | -1.8266577 | -2.4483170 | -1.2300917 |
| H | -0.0406819 | -2.0533032 | 0.3628096  |
| H | -1.0373479 | -2.6056444 | 1.7047022  |
| H | -2.9186589 | 3.1702161  | -1.2632504 |
| H | -2.1551452 | 2.0393923  | -2.4224615 |
| H | -3.1017471 | 1.3936829  | -1.0344836 |
| H | -1.8806219 | 3.6362290  | 1.2200052  |
| H | -0.8493491 | 2.3982234  | 1.9851050  |
| H | -2.5150912 | 1.9742148  | 1.4534581  |

1a\_sy\_c\_2.log

E = -1109.628122

H = -1109.322708

G = -1109.387720

NImag=0

|   |            |           |            |
|---|------------|-----------|------------|
| C | 2.8497975  | 3.2555513 | 0.8135849  |
| C | 1.7272651  | 2.3756227 | 0.3239393  |
| C | 2.6772417  | 3.6922958 | 2.1197700  |
| O | 3.3855048  | 4.4756288 | 2.8242885  |
| C | 0.7898470  | 3.0123258 | -0.7363766 |
| C | 1.2332366  | 2.9687292 | -2.1750784 |
| C | 2.5845025  | 3.0418273 | -2.5378504 |
| C | 2.9610521  | 2.9947532 | -3.8742707 |
| C | 1.9773398  | 2.8716749 | -4.8628688 |
| C | 0.6241897  | 2.7861247 | -4.5188917 |
| C | 0.2637835  | 2.8318165 | -3.1773012 |
| C | 1.3797033  | 3.0856743 | 2.6758354  |
| C | 0.9515376  | 2.0436135 | 1.6337254  |
| S | 0.4592055  | 4.7546762 | -0.1600265 |
| C | 1.6214238  | 5.8183776 | -1.0368969 |
| C | -1.0514098 | 5.1695586 | -1.0586220 |
| C | 2.3640182  | 2.8225111 | -6.2482563 |
| N | 2.6747455  | 2.7840606 | -7.3631842 |
| H | 3.6954208  | 3.5589129 | 0.2031884  |
| H | 2.0613020  | 1.4429213 | -0.1535105 |
| H | -0.2101173 | 2.5663922 | -0.6753474 |
| H | 3.3523276  | 3.1323245 | -1.7782208 |
| H | 4.0079953  | 3.0502929 | -4.1534662 |
| H | -0.1299527 | 2.6780306 | -5.2912299 |
| H | -0.7845899 | 2.7486350 | -2.9034149 |
| H | 1.5573365  | 2.6479755 | 3.6640373  |
| H | 0.6374573  | 3.8844052 | 2.8082099  |
| H | -0.1320252 | 2.0133121 | 1.4719924  |

|   |            |           |            |
|---|------------|-----------|------------|
| H | 1.2535573  | 1.0447468 | 1.9630199  |
| H | 1.3614961  | 6.8425158 | -0.7593910 |
| H | 2.6244193  | 5.5744147 | -0.6883444 |
| H | 1.5201783  | 5.6750937 | -2.1141809 |
| H | -1.3071117 | 6.1966431 | -0.7908049 |
| H | -1.8391353 | 4.4928775 | -0.7233754 |
| H | -0.8918426 | 5.0874840 | -2.1353812 |

la\_sy\_c\_2\_r.log

E = -1109.626722  
H = -1109.321416  
G = -1109.386229

NImag=0

|   |            |            |            |
|---|------------|------------|------------|
| C | 0.2315518  | -1.7888184 | -1.3663476 |
| C | -0.7653785 | -0.7323031 | -1.7530262 |
| C | -0.3510424 | -2.8556619 | -0.6986784 |
| O | 0.1690997  | -3.8823067 | -0.1613767 |
| C | -0.6197135 | 0.5135244  | -0.8239616 |
| C | -0.9899408 | 0.2855224  | 0.6226165  |
| C | -2.3067243 | 0.3639921  | 1.0934308  |
| C | -2.6029299 | 0.0803265  | 2.4213228  |
| C | -1.5715499 | -0.2954326 | 3.2889979  |
| C | -0.2487562 | -0.3688568 | 2.8376463  |
| C | 0.0333941  | -0.0669123 | 1.5110019  |
| C | -1.8729943 | -2.6257333 | -0.6529577 |
| C | -2.1241472 | -1.4651483 | -1.6254206 |
| S | -1.6122836 | 1.9384538  | -1.4773261 |
| C | -1.0105013 | 3.2956376  | -0.4509999 |
| C | -0.7627140 | 2.3057008  | -3.0260737 |
| C | -1.8720601 | -0.5953732 | 4.6636889  |
| N | -2.1136361 | -0.8358531 | 5.7705457  |
| H | 1.3040997  | -1.6485758 | -1.4776328 |
| H | -0.6216430 | -0.3622766 | -2.7765742 |
| H | 0.4149704  | 0.8705554  | -0.8839981 |
| H | -3.1233336 | 0.6435848  | 0.4334650  |
| H | -3.6237127 | 0.1436589  | 2.7828173  |
| H | 0.5455376  | -0.6513184 | 3.5205092  |
| H | 1.0584369  | -0.1108040 | 1.1563297  |
| H | -2.4123876 | -3.5373686 | -0.9321157 |
| H | -2.1614862 | -2.3811405 | 0.3787809  |
| H | -2.9468785 | -0.8077039 | -1.3219869 |
| H | -2.3828975 | -1.8620941 | -2.6121381 |
| H | -1.3975966 | 4.2216777  | -0.8798218 |
| H | -1.4062660 | 3.1586715  | 0.5561398  |
| H | 0.0814801  | 3.2897116  | -0.4507595 |
| H | -1.0472584 | 3.3226737  | -3.3035257 |
| H | -1.1107912 | 1.6076749  | -3.7867171 |
| H | 0.3164985  | 2.2307653  | -2.8761283 |

la\_sy\_c\_2\_ts1.log

E = -1109.596717  
H = -1109.293713  
G = -1109.358648

NImag=1

|   |            |            |            |
|---|------------|------------|------------|
| C | -1.4693990 | -1.8705846 | 0.1249581  |
| C | -1.3770451 | -1.1889140 | -1.0888573 |
| C | -2.8007528 | -1.7963997 | 0.6461940  |
| O | -3.2464713 | -2.2602552 | 1.7063823  |
| C | -0.4359173 | 0.7509447  | -0.9743689 |
| C | 0.9182441  | 0.4458459  | -0.5660606 |

|   |            |            |            |
|---|------------|------------|------------|
| C | 1.3487088  | 0.3794501  | 0.7784506  |
| C | 2.6322563  | -0.0344919 | 1.1025732  |
| C | 3.5270411  | -0.4105549 | 0.0913381  |
| C | 3.1182523  | -0.3679468 | -1.2528586 |
| C | 1.8399569  | 0.0541107  | -1.5681779 |
| C | -3.6543213 | -0.9991149 | -0.3455479 |
| C | -2.7756661 | -0.8707621 | -1.5955184 |
| S | -1.4372416 | 1.9025269  | -0.1196177 |
| C | -1.7840383 | 1.2845853  | 1.5564969  |
| C | -0.4340009 | 3.3594090  | 0.2866632  |
| C | 4.8521914  | -0.8377500 | 0.4269766  |
| N | 5.9259683  | -1.1841160 | 0.6975999  |
| H | -0.6503635 | -2.3637497 | 0.6379598  |
| H | -0.5894118 | -1.3997493 | -1.8076710 |
| H | -0.5697455 | 0.9580460  | -2.0344387 |
| H | 0.6827821  | 0.6533319  | 1.5886792  |
| H | 2.9446749  | -0.0726007 | 2.1415011  |
| H | 3.8094004  | -0.6583567 | -2.0379771 |
| H | 1.5331288  | 0.0938783  | -2.6099052 |
| H | -4.6091074 | -1.5013932 | -0.5234327 |
| H | -3.8831976 | -0.0213580 | 0.1000223  |
| H | -2.8470040 | 0.1011931  | -2.0914602 |
| H | -3.0472503 | -1.6321867 | -2.3365438 |
| H | -2.8204893 | 1.5362322  | 1.7857929  |
| H | -1.6428259 | 0.2036804  | 1.5675723  |
| H | -1.1129212 | 1.7661451  | 2.2691183  |
| H | -1.0550583 | 4.0234802  | 0.8925088  |
| H | -0.1714727 | 3.8421640  | -0.6557751 |
| H | 0.4600098  | 3.0576275  | 0.8349675  |

1a\_sy\_c\_3.log

E = -1109.627767

H = -1109.322417

G = -1109.388074

NImag=0

|   |            |           |            |
|---|------------|-----------|------------|
| C | 2.5893875  | 3.9935605 | 1.4774016  |
| C | 2.5444006  | 3.3145599 | 0.1370121  |
| C | 1.9750525  | 3.2372563 | 2.4651411  |
| O | 1.7043861  | 3.5156845 | 3.6732645  |
| C | 1.3393486  | 3.7372283 | -0.7576901 |
| C | 1.4850697  | 3.3633299 | -2.2091676 |
| C | 0.5169972  | 2.5554111 | -2.8136827 |
| C | 0.6423360  | 2.1743774 | -4.1449903 |
| C | 1.7469850  | 2.6179172 | -4.8801933 |
| C | 2.7224927  | 3.4322056 | -4.2905653 |
| C | 2.5888701  | 3.7960187 | -2.9570640 |
| C | 1.5800642  | 1.8802252 | 1.8502903  |
| C | 2.3376254  | 1.8268940 | 0.5172962  |
| S | 1.0889966  | 5.5750702 | -0.6033565 |
| C | -0.0070034 | 5.9510710 | -1.9890816 |
| C | -0.1111089 | 5.6906966 | 0.7432900  |
| C | 1.8826384  | 2.2330112 | -6.2602064 |
| N | 1.9910973  | 1.9233022 | -7.3708319 |
| H | 2.9305839  | 5.0168132 | 1.6185561  |
| H | 3.4514670  | 3.4496040 | -0.4647395 |
| H | 0.4077452  | 3.3214804 | -0.3563591 |
| H | -0.3404026 | 2.2211492 | -2.2364927 |
| H | -0.1063120 | 1.5440173 | -4.6132517 |
| H | 3.5724204  | 3.7708601 | -4.8734802 |
| H | 3.3485828  | 4.4279457 | -2.5039176 |
| H | 1.8319781  | 1.0541564 | 2.5235361  |

|   |            |           |            |
|---|------------|-----------|------------|
| H | 0.4900898  | 1.8590320 | 1.7065810  |
| H | 1.8198594  | 1.2573987 | -0.2637915 |
| H | 3.3214374  | 1.3700518 | 0.6653906  |
| H | -0.3812668 | 6.9634435 | -1.8231695 |
| H | 0.5737530  | 5.9183349 | -2.9112741 |
| H | -0.8296850 | 5.2333441 | -2.0142737 |
| H | -0.4165732 | 6.7373134 | 0.8064939  |
| H | 0.3886761  | 5.3754092 | 1.6589030  |
| H | -0.9633891 | 5.0481262 | 0.5127230  |

1a\_sy\_c\_3\_ts1.log

E = -1109.599461  
H = -1109.297106  
G = -1109.363346

NImag=1

|   |            |            |            |
|---|------------|------------|------------|
| C | 2.5412308  | -0.8786370 | -1.2452133 |
| C | 1.2722264  | -1.1446965 | -0.7352918 |
| C | 3.5482298  | -1.3975635 | -0.3657298 |
| O | 4.7808818  | -1.3227225 | -0.4698012 |
| C | 0.4205283  | 0.4720623  | 0.4957670  |
| C | -0.9907755 | 0.2605567  | 0.3131790  |
| C | -1.7041968 | -0.4962051 | 1.2774959  |
| C | -3.0342899 | -0.8262632 | 1.0975437  |
| C | -3.7128454 | -0.4065766 | -0.0608125 |
| C | -3.0293359 | 0.3428683  | -1.0315032 |
| C | -1.6955500 | 0.6651377  | -0.8490124 |
| C | 2.8356022  | -2.0628494 | 0.8142915  |
| C | 1.3807425  | -2.1972594 | 0.3519529  |
| S | 1.1247296  | 1.8843578  | -0.2808535 |
| C | 0.3456694  | 3.3377322  | 0.4713226  |
| C | 2.7328788  | 1.9630977  | 0.5273303  |
| C | -5.0911292 | -0.7395928 | -0.2493694 |
| N | -6.2094722 | -1.0105526 | -0.4025443 |
| H | 2.7613221  | -0.2973741 | -2.1347402 |
| H | 0.3765649  | -1.0829551 | -1.3497427 |
| H | 0.8089706  | 0.3456673  | 1.5059070  |
| H | -1.1922915 | -0.8129896 | 2.1820031  |
| H | -3.5612921 | -1.4019291 | 1.8523654  |
| H | -3.5497641 | 0.6663205  | -1.9278662 |
| H | -1.1924127 | 1.2378672  | -1.6244508 |
| H | 3.3158132  | -3.0043573 | 1.0927180  |
| H | 2.9102443  | -1.3794459 | 1.6721339  |
| H | 0.6441229  | -2.0769648 | 1.1502270  |
| H | 1.2134707  | -3.1802754 | -0.1059209 |
| H | 0.8539033  | 4.2262052  | 0.0893378  |
| H | -0.7013079 | 3.3473187  | 0.1626829  |
| H | 0.4307632  | 3.2683393  | 1.5572802  |
| H | 3.2094141  | 2.8921591  | 0.2101781  |
| H | 3.3210700  | 1.1088597  | 0.1944754  |
| H | 2.5849004  | 1.9489892  | 1.6091634  |

1a\_sy\_c\_4.log

E = -1109.626849  
H = -1109.321183  
G = -1109.386179

NImag=0

|   |           |           |           |
|---|-----------|-----------|-----------|
| C | 2.7615693 | 3.3574711 | 0.7698546 |
| C | 1.5978874 | 2.5999384 | 0.1862207 |
| C | 2.7535058 | 3.4088868 | 2.1549203 |
| O | 3.5752004 | 3.9396830 | 2.9645113 |

|   |            |           |            |
|---|------------|-----------|------------|
| C | 0.7578016  | 3.3643849 | -0.8786098 |
| C | 1.1960046  | 3.1613638 | -2.3104810 |
| C | 2.5253905  | 3.3698325 | -2.7007579 |
| C | 2.9127111  | 3.1669004 | -4.0190799 |
| C | 1.9614010  | 2.7467400 | -4.9571702 |
| C | 0.6309834  | 2.5325763 | -4.5821279 |
| C | 0.2567869  | 2.7467439 | -3.2602461 |
| C | 1.5141671  | 2.6653654 | 2.6767394  |
| C | 0.7415546  | 2.2027140 | 1.4319598  |
| S | 0.8556222  | 5.1836511 | -0.5489827 |
| C | -0.3910331 | 5.7985666 | -1.7049005 |
| C | -0.0454952 | 5.3955614 | 0.9991023  |
| C | 2.3584656  | 2.5324958 | -6.3237600 |
| N | 2.6778192  | 2.3608816 | -7.4236093 |
| H | 3.5796772  | 3.7496804 | 0.1717443  |
| H | 1.9012953  | 1.6866816 | -0.3485897 |
| H | -0.3066962 | 3.1174898 | -0.7934031 |
| H | 3.2676571  | 3.6914432 | -1.9766175 |
| H | 3.9413423  | 3.3289889 | -4.3235216 |
| H | -0.0972750 | 2.2064968 | -5.3171755 |
| H | -0.7754355 | 2.5868317 | -2.9621299 |
| H | 1.8421702  | 1.8257642 | 3.3010698  |
| H | 0.9258772  | 3.3277776 | 3.3251517  |
| H | -0.2465631 | 2.6703414 | 1.3825178  |
| H | 0.5715640  | 1.1226137 | 1.4347409  |
| H | -0.5615820 | 6.8479920 | -1.4566980 |
| H | 0.0150947  | 5.7227097 | -2.7144592 |
| H | -1.3137358 | 5.2232322 | -1.6064206 |
| H | -0.2244208 | 6.4675375 | 1.1066895  |
| H | 0.5918155  | 5.0405542 | 1.8088431  |
| H | -0.9892277 | 4.8492083 | 0.9544750  |

la\_sy\_c\_4\_ts1.log

E = -1109.596603

H = -1109.294017

G = -1109.360184

NImag=1

|   |            |            |            |
|---|------------|------------|------------|
| C | 1.7588144  | -1.4811927 | -0.8166067 |
| C | 1.2197508  | -1.3122527 | 0.4596718  |
| C | 3.1871041  | -1.5583148 | -0.7738860 |
| O | 3.9850166  | -1.6785885 | -1.7160008 |
| C | 0.3110758  | 0.6654573  | 0.7286593  |
| C | -1.0701924 | 0.3913740  | 0.4189934  |
| C | -1.6063847 | 0.4148931  | -0.8922067 |
| C | -2.9110647 | 0.0231497  | -1.1423133 |
| C | -3.7303047 | -0.4162184 | -0.0906855 |
| C | -3.2169431 | -0.4611897 | 1.2174969  |
| C | -1.9148981 | -0.0663619 | 1.4615571  |
| C | 3.6262615  | -1.5496209 | 0.6948238  |
| C | 2.3270995  | -1.4098230 | 1.5041813  |
| S | 1.1595668  | 1.6908176  | -0.4118164 |
| C | 0.5096013  | 3.3652084  | -0.1740299 |
| C | 2.7696912  | 1.8720632  | 0.3670728  |
| C | -5.0794373 | -0.8166872 | -0.3487231 |
| N | -6.1738979 | -1.1424147 | -0.5567786 |
| H | 1.1863810  | -1.5641277 | -1.7350128 |
| H | 0.2286022  | -1.6704217 | 0.7223972  |
| H | 0.5392476  | 0.9298157  | 1.7608696  |
| H | -0.9996152 | 0.7440741  | -1.7316800 |
| H | -3.3030702 | 0.0540729  | -2.1542603 |
| H | -3.8466826 | -0.8030694 | 2.0332018  |

|   |            |            |            |
|---|------------|------------|------------|
| H | -1.5267188 | -0.1016165 | 2.4758946  |
| H | 4.1422179  | -2.4927747 | 0.9033559  |
| H | 4.3504938  | -0.7481266 | 0.8752244  |
| H | 2.3377738  | -0.5432668 | 2.1716277  |
| H | 2.1445706  | -2.2895742 | 2.1303376  |
| H | 1.0871937  | 4.0450837  | -0.8044991 |
| H | -0.5338167 | 3.3564133  | -0.4942030 |
| H | 0.5899096  | 3.6374387  | 0.8798574  |
| H | 3.2824664  | 2.6920649  | -0.1385232 |
| H | 3.3247921  | 0.9482352  | 0.2157175  |
| H | 2.6373236  | 2.0909176  | 1.4285393  |

1a\_sy\_c\_5.log

E = -1109.623616  
H = -1109.317751  
G = -1109.382360

NImag=0

|   |            |           |            |
|---|------------|-----------|------------|
| C | 2.1012286  | 4.0976199 | 1.5565838  |
| C | 2.3429015  | 3.7353566 | 0.1149485  |
| C | 1.9322358  | 2.9836437 | 2.3659557  |
| O | 1.6553257  | 2.8920171 | 3.6019896  |
| C | 1.0933640  | 3.7907624 | -0.8086552 |
| C | 1.3357934  | 3.3322566 | -2.2303212 |
| C | 2.3941655  | 3.8504810 | -2.9876450 |
| C | 2.6180467  | 3.4032009 | -4.2843293 |
| C | 1.7775654  | 2.4248793 | -4.8281879 |
| C | 0.7167579  | 1.8968688 | -4.0829189 |
| C | 0.5027235  | 2.3569266 | -2.7894164 |
| C | 2.1161547  | 1.7273944 | 1.4955938  |
| C | 2.7858148  | 2.2473073 | 0.2201418  |
| S | 0.2915578  | 5.4639342 | -0.9505943 |
| C | -0.7117767 | 5.6289513 | 0.5386295  |
| C | 1.6032557  | 6.6688203 | -0.6724877 |
| C | 2.0092830  | 1.9548503 | -6.1682282 |
| N | 2.1956603  | 1.5762557 | -7.2467555 |
| H | 2.0030472  | 5.1157695 | 1.9216425  |
| H | 3.1271800  | 4.3297867 | -0.3716038 |
| H | 0.2847586  | 3.1963053 | -0.3652361 |
| H | 3.0580507  | 4.6020611 | -2.5703950 |
| H | 3.4375423  | 3.8033226 | -4.8721276 |
| H | 0.0731066  | 1.1373026 | -4.5141341 |
| H | -0.3163611 | 1.9495985 | -2.2034003 |
| H | 2.7137451  | 0.9725597 | 2.0173411  |
| H | 1.1326652  | 1.2798245 | 1.2930932  |
| H | 2.5475970  | 1.6606289 | -0.6731870 |
| H | 3.8738151  | 2.2331386 | 0.3429920  |
| H | -1.1665890 | 6.6209216 | 0.4957994  |
| H | -1.4876402 | 4.8627345 | 0.4878521  |
| H | -0.0948883 | 5.5069867 | 1.4269255  |
| H | 1.1236125  | 7.6495427 | -0.7006807 |
| H | 2.3138714  | 6.5870855 | -1.4966570 |
| H | 2.0862291  | 6.4999044 | 0.2892727  |

1a\_sy\_c\_6.log

E = -1109.627832  
H = -1109.322223  
G = -1109.386436

NImag=0

|   |           |           |           |
|---|-----------|-----------|-----------|
| C | 2.7090650 | 3.5619201 | 0.8762186 |
| C | 1.6435279 | 2.6260849 | 0.3581492 |

|   |            |           |            |
|---|------------|-----------|------------|
| C | 2.8719421  | 3.4577003 | 2.2529149  |
| O | 3.7201387  | 3.9972046 | 3.0253170  |
| C | 0.7056882  | 3.1605515 | -0.7448607 |
| C | 1.1821121  | 3.0444202 | -2.1685182 |
| C | 2.5398326  | 3.1540590 | -2.4957972 |
| C | 2.9588930  | 3.0434121 | -3.8153429 |
| C | 2.0112685  | 2.8168943 | -4.8209770 |
| C | 0.6530398  | 2.6911106 | -4.5103458 |
| C | 0.2493236  | 2.8028252 | -3.1848277 |
| C | 1.8254978  | 2.4684972 | 2.7940125  |
| C | 0.8410583  | 2.2826472 | 1.6379402  |
| S | 0.2859989  | 4.9221423 | -0.2952500 |
| C | 1.4388126  | 5.9705879 | -1.2026539 |
| C | -1.2039127 | 5.2120668 | -1.2742303 |
| C | 2.4420463  | 2.7022255 | -6.1893880 |
| N | 2.7883592  | 2.6112983 | -7.2906956 |
| H | 3.4318490  | 4.0707931 | 0.2444253  |
| H | 2.0505133  | 1.6953859 | -0.0757328 |
| H | -0.2760122 | 2.6760784 | -0.6655838 |
| H | 3.2781592  | 3.3224150 | -1.7188521 |
| H | 4.0104181  | 3.1279256 | -4.0686852 |
| H | -0.0708743 | 2.5014303 | -5.2957738 |
| H | -0.8020066 | 2.6893660 | -2.9343966 |
| H | 2.3361243  | 1.5294227 | 3.0481353  |
| H | 1.3583816  | 2.8432055 | 3.7110394  |
| H | 0.0168250  | 2.9997534 | 1.7470636  |
| H | 0.3964239  | 1.2840171 | 1.5805261  |
| H | 1.1306025  | 6.9988878 | -1.0004398 |
| H | 2.4392101  | 5.7951128 | -0.8095284 |
| H | 1.3806983  | 5.7547790 | -2.2708357 |
| H | -1.5128689 | 6.2411924 | -1.0809050 |
| H | -1.9749177 | 4.5227012 | -0.9262920 |
| H | -0.9989174 | 5.0712858 | -2.3369295 |

1a\_sy\_c\_7.log

E = -1109.628358

H = -1109.322813

G = -1109.388215

NImag=0

|   |            |           |            |
|---|------------|-----------|------------|
| C | 1.7270994  | 3.8818607 | 1.7375521  |
| C | 2.0743893  | 3.5764877 | 0.3034944  |
| C | 2.3081238  | 2.9804709 | 2.6193534  |
| O | 2.3284981  | 2.9581172 | 3.8879278  |
| C | 0.9088061  | 3.6882215 | -0.6944982 |
| C | 1.2203878  | 3.3244884 | -2.1221858 |
| C | 2.4166895  | 3.7129787 | -2.7407853 |
| C | 2.6817700  | 3.3466715 | -4.0552441 |
| C | 1.7441540  | 2.5817839 | -4.7585162 |
| C | 0.5482796  | 2.1789658 | -4.1531793 |
| C | 0.2963609  | 2.5538674 | -2.8394675 |
| C | 3.0562082  | 1.9148374 | 1.7980957  |
| C | 2.5513236  | 2.1013526 | 0.3643871  |
| S | 0.1772151  | 5.3906604 | -0.5413386 |
| C | 1.4755879  | 6.5116820 | -1.0886906 |
| C | -0.9700401 | 5.4956891 | -1.9256788 |
| C | 2.0169146  | 2.1988328 | -6.1186065 |
| N | 2.2359961  | 1.8910548 | -7.2132760 |
| H | 1.2637798  | 4.8115070 | 2.0605374  |
| H | 2.8951578  | 4.2041534 | -0.0825464 |
| H | 0.0763250  | 3.0736376 | -0.3297917 |
| H | 3.1558162  | 4.2947699 | -2.1989079 |



|   |            |           |            |
|---|------------|-----------|------------|
| H | 3.6083201  | 3.6453888 | -4.5340265 |
| H | -0.1685268 | 1.5808920 | -4.7058195 |
| H | -0.6281749 | 2.2427984 | -2.3609159 |
| H | 4.1348094  | 2.1090988 | 1.8774827  |
| H | 2.8775945  | 0.9089658 | 2.1927746  |
| H | 1.6877104  | 1.4465708 | 0.1904755  |
| H | 3.2969418  | 1.8762363 | -0.4045081 |
| H | 1.0397681  | 7.5130161 | -1.0722894 |
| H | 2.2969232  | 6.4572048 | -0.3723776 |
| H | 1.8017802  | 6.2542031 | -2.0976167 |
| H | -1.4284469 | 6.4855866 | -1.8781582 |
| H | -1.7331587 | 4.7275756 | -1.7853460 |
| H | -0.4382830 | 5.3592722 | -2.8688100 |

1a\_sy\_c\_7\_ts1.log

E = -1109.597215

H = -1109.294348

G = -1109.360538

NImag=1

|   |            |            |            |
|---|------------|------------|------------|
| C | -2.9563358 | -0.4458108 | 0.9853411  |
| C | -1.6155514 | -0.8166252 | 0.9218933  |
| C | -3.7474811 | -1.2839621 | 0.1312394  |
| O | -4.9668691 | -1.2384140 | -0.0821232 |
| C | -0.5014649 | 0.3513205  | -0.5713157 |
| C | 0.9084873  | 0.1293155  | -0.3647464 |
| C | 1.6678378  | 0.7568541  | 0.6528314  |
| C | 2.9976962  | 0.4315630  | 0.8653126  |
| C | 3.6194810  | -0.5476863 | 0.0761537  |
| C | 2.8847271  | -1.1974223 | -0.9313820 |
| C | 1.5612544  | -0.8601047 | -1.1442913 |
| C | -2.8101532 | -2.2996784 | -0.5274972 |
| C | -1.5010079 | -2.1768171 | 0.2597089  |
| S | -1.2554987 | 1.9215690  | -0.4447421 |
| C | -1.1957165 | 2.5145209  | 1.2715531  |
| C | -0.1700782 | 3.1446454  | -1.2198241 |
| C | 4.9924729  | -0.8849147 | 0.2986042  |
| N | 6.1058745  | -1.1586372 | 0.4787861  |
| H | -3.3621924 | 0.3985573  | 1.5334185  |
| H | -0.8765105 | -0.5187420 | 1.6625585  |
| H | -0.9309345 | -0.1241792 | -1.4513672 |
| H | 1.2151931  | 1.5002143  | 1.2993199  |
| H | 3.5598076  | 0.9283774  | 1.6501159  |
| H | 3.3625962  | -1.9537770 | -1.5464330 |
| H | 1.0063293  | -1.3555744 | -1.9363999 |
| H | -3.2479176 | -3.3013711 | -0.5195633 |
| H | -2.6726954 | -2.0037271 | -1.5757842 |
| H | -0.6003829 | -2.2881578 | -0.3490791 |
| H | -1.4547352 | -2.9345620 | 1.0516899  |
| H | -2.0140791 | 3.2288962  | 1.3782774  |
| H | -1.3489158 | 1.6735627  | 1.9469871  |
| H | -0.2434463 | 3.0072908  | 1.4686300  |
| H | -0.6024889 | 4.1316525  | -1.0394559 |
| H | -0.1518429 | 2.9298177  | -2.2892495 |
| H | 0.8320891  | 3.0776668  | -0.7921568 |

1a\_sy\_c\_8.log

E = -1109.629117

H = -1109.323353

G = -1109.388271

NImag=0

|   |            |           |            |
|---|------------|-----------|------------|
| C | 2.1969190  | 4.1198793 | 1.6431375  |
| C | 2.4347350  | 3.6665600 | 0.2277301  |
| C | 2.0542954  | 3.0562731 | 2.5237124  |
| O | 1.7884381  | 3.0357246 | 3.7644641  |
| C | 1.1604172  | 3.6724975 | -0.6618723 |
| C | 1.3524845  | 3.3126855 | -2.1115219 |
| C | 2.4309585  | 3.8061440 | -2.8583573 |
| C | 2.5899252  | 3.4455571 | -4.1916119 |
| C | 1.6645319  | 2.5799431 | -4.7853213 |
| C | 0.5855550  | 2.0724219 | -4.0518506 |
| C | 0.4384705  | 2.4433404 | -2.7215112 |
| C | 2.2589297  | 1.7490955 | 1.7340504  |
| C | 2.8889084  | 2.1932428 | 0.4092492  |
| S | 0.3118634  | 5.3087463 | -0.4449271 |
| C | 1.5054586  | 6.5278346 | -1.0208937 |
| C | -0.8936354 | 5.3578183 | -1.7831280 |
| C | 1.8269409  | 2.2029127 | -6.1645388 |
| N | 1.9566508  | 1.8997364 | -7.2746689 |
| H | 2.0715650  | 5.1622935 | 1.9275078  |
| H | 3.2052498  | 4.2428496 | -0.2991347 |
| H | 0.4193517  | 2.9999833 | -0.2113544 |
| H | 3.1607090  | 4.4700331 | -2.4061992 |
| H | 3.4253435  | 3.8270554 | -4.7690521 |
| H | -0.1228309 | 1.3972566 | -4.5202519 |
| H | -0.3954428 | 2.0519032 | -2.1453128 |
| H | 2.8886235  | 1.0497990 | 2.2941271  |
| H | 1.2851725  | 1.2612260 | 1.5881700  |
| H | 2.6195485  | 1.5585683 | -0.4425616 |
| H | 3.9802507  | 2.1834011 | 0.4953621  |
| H | 1.0111688  | 7.4986425 | -0.9465396 |
| H | 2.3674046  | 6.5021223 | -0.3523282 |
| H | 1.7909002  | 6.3239695 | -2.0540235 |
| H | -1.4148959 | 6.3133544 | -1.6962843 |
| H | -1.5979580 | 4.5380475 | -1.6278552 |
| H | -0.3954064 | 5.2742812 | -2.7505103 |

1a\_sy\_c\_8\_r.log

E = -1109.622692

H = -1109.316830

G = -1109.380877

NImag=0

|   |            |            |            |
|---|------------|------------|------------|
| C | -1.1520157 | -0.0348257 | 2.1228427  |
| C | -1.7022955 | -0.4365054 | 0.7834591  |
| C | -2.0534054 | 0.6851253  | 2.8913175  |
| O | -1.9198202 | 1.2319910  | 4.0302733  |
| C | -0.9338776 | 0.3048953  | -0.3446920 |
| C | -0.8630760 | 1.8106196  | -0.3315437 |
| C | -2.0026788 | 2.6252851  | -0.2841019 |
| C | -1.8832463 | 4.0087918  | -0.2477686 |
| C | -0.6104552 | 4.5915995  | -0.2657827 |
| C | 0.5383313  | 3.7963599  | -0.3241236 |
| C | 0.4012368  | 2.4137124  | -0.3584579 |
| C | -3.3880044 | 0.7734710  | 2.1305739  |
| C | -3.2266935 | -0.1686378 | 0.9282075  |
| S | -1.4350517 | -0.3776376 | -2.0183303 |
| C | -2.6530582 | 0.7396232  | -2.7396786 |
| C | -0.0011870 | 0.0312717  | -3.0326760 |
| C | -0.4839951 | 6.0246142  | -0.2299588 |
| N | -0.3819343 | 7.1778537  | -0.2029857 |
| H | -0.1153359 | -0.2085066 | 2.4022608  |
| H | -1.5449717 | -1.4999641 | 0.5489531  |

|   |            |            |            |
|---|------------|------------|------------|
| H | 0.0930015  | -0.0786593 | -0.3046487 |
| H | -2.9955604 | 2.1905300  | -0.2819063 |
| H | -2.7678860 | 4.6355353  | -0.2073618 |
| H | 1.5209088  | 4.2558736  | -0.3390290 |
| H | 1.2908255  | 1.7911559  | -0.3973675 |
| H | -4.2170934 | 0.4785535  | 2.7833361  |
| H | -3.5673033 | 1.8175174  | 1.8429500  |
| H | -3.6974844 | 0.2045065  | 0.0124557  |
| H | -3.7058230 | -1.1271502 | 1.1497346  |
| H | -2.8581396 | 0.3472286  | -3.7381112 |
| H | -3.5632711 | 0.7057919  | -2.1405020 |
| H | -2.2488162 | 1.7510070  | -2.8006001 |
| H | -0.2354936 | -0.2643710 | -4.0572283 |
| H | 0.8446426  | -0.5491407 | -2.6609776 |
| H | 0.1978416  | 1.1034779  | -2.9759196 |

la\_sy\_c\_9.log

E = -1109.623551  
H = -1109.317825  
G = -1109.383077

NImag=0

|   |            |           |            |
|---|------------|-----------|------------|
| C | 1.6625500  | 3.8930771 | 1.6009635  |
| C | 1.9927905  | 3.6398378 | 0.1528754  |
| C | 2.2065724  | 2.9290502 | 2.4402876  |
| O | 2.2293802  | 2.8558499 | 3.7066848  |
| C | 0.8581681  | 3.8253240 | -0.8721770 |
| C | 1.2129579  | 3.3558549 | -2.2652624 |
| C | 0.4117494  | 2.3936307 | -2.8873789 |
| C | 0.7276421  | 1.9200130 | -4.1556646 |
| C | 1.8582204  | 2.4218709 | -4.8091908 |
| C | 2.6705589  | 3.3856897 | -4.1991506 |
| C | 2.3456526  | 3.8457106 | -2.9292225 |
| C | 2.9032279  | 1.8686274 | 1.5717741  |
| C | 2.3946257  | 2.1373526 | 0.1543886  |
| S | 0.2386433  | 5.5752275 | -1.0542339 |
| C | -0.9702139 | 5.7633716 | 0.2702859  |
| C | 1.5846924  | 6.6375221 | -0.4972346 |
| C | 2.1903121  | 1.9417890 | -6.1242522 |
| N | 2.4568781  | 1.5555513 | -7.1830156 |
| H | 1.2672782  | 4.8290278 | 1.9839671  |
| H | 2.8479021  | 4.2370106 | -0.2092252 |
| H | -0.0398567 | 3.3012751 | -0.5233825 |
| H | -0.4642394 | 2.0090768 | -2.3729939 |
| H | 0.1073178  | 1.1711308 | -4.6368648 |
| H | 3.5460585  | 3.7644909 | -4.7158443 |
| H | 2.9889451  | 4.5851969 | -2.4598035 |
| H | 3.9892665  | 2.0171605 | 1.6483056  |
| H | 2.6873276  | 0.8544151 | 1.9238371  |
| H | 1.4962767  | 1.5346111 | -0.0318637 |
| H | 3.1177495  | 1.9039434 | -0.6331151 |
| H | -1.3209907 | 6.7963787 | 0.2250614  |
| H | -1.7947183 | 5.0828686 | 0.0513857  |
| H | -0.5223853 | 5.5413163 | 1.2370802  |
| H | 1.1950346  | 7.6573697 | -0.5244175 |
| H | 2.4052416  | 6.5413376 | -1.2097033 |
| H | 1.8972841  | 6.3648398 | 0.5109997  |

la\_sy\_c\_prod\_1.log

E = -631.738876  
H = -631.517360

G = -631.569661  
 NImag=0

|   |            |            |             |
|---|------------|------------|-------------|
| C | 1.3273116  | 0.0752224  | -3.1443791  |
| C | -0.1143880 | 0.4543975  | -3.1417364  |
| C | -0.8774831 | -0.7322537 | -3.7125871  |
| C | 0.1175723  | -1.8489560 | -4.0267529  |
| C | 1.5173824  | -1.2205411 | -3.9212160  |
| O | 2.2111675  | 0.6797459  | -2.5670201  |
| C | -0.7901536 | 0.5300440  | -4.5024121  |
| C | -0.0325720 | 0.6555678  | -5.7869229  |
| C | 0.9642138  | 1.6271803  | -5.9398895  |
| C | 1.6502960  | 1.7585900  | -7.1408453  |
| C | 1.3344381  | 0.9053194  | -8.2059281  |
| C | 0.3343915  | -0.0659113 | -8.0729376  |
| C | -0.3430086 | -0.1822913 | -6.8645449  |
| H | -1.6910622 | 1.1398757  | -4.4743912  |
| H | -0.4815493 | 1.0858035  | -2.3413634  |
| H | -1.8402646 | -1.0003830 | -3.2921564  |
| C | 2.0428082  | 1.0306838  | -9.4514049  |
| N | 2.6132338  | 1.1319339  | -10.4546066 |
| H | 0.0045398  | -2.6347284 | -3.2748254  |
| H | -0.0665097 | -2.2989035 | -5.0067418  |
| H | 1.9500632  | -0.9750441 | -4.8986034  |
| H | 2.2363343  | -1.8540586 | -3.3961935  |
| H | 1.2067346  | 2.2836693  | -5.1085548  |
| H | 2.4241821  | 2.5102720  | -7.2579930  |
| H | 0.0968829  | -0.7185167 | -8.9067299  |
| H | -1.1209611 | -0.9324177 | -6.7542638  |

1a\_sy\_tr\_1.log  
 E = -1109.625308  
 H = -1109.319791  
 G = -1109.385435  
 NImag=0

|   |            |           |            |
|---|------------|-----------|------------|
| C | 5.1854047  | 1.2381520 | 1.8128887  |
| C | 3.7037935  | 1.4464244 | 1.9712516  |
| C | 3.3322244  | 2.2564809 | 0.7062173  |
| C | 4.3756719  | 1.8347882 | -0.3334817 |
| C | 5.5956771  | 1.3967417 | 0.4955180  |
| O | 6.7230801  | 1.2014708 | -0.0525826 |
| C | 3.2868064  | 2.0792639 | 3.3139874  |
| C | 1.8020449  | 2.3187999 | 3.4565970  |
| C | 1.1254744  | 3.3151646 | 2.7397108  |
| C | -0.2490622 | 3.4663928 | 2.8664972  |
| C | -0.9600907 | 2.6059397 | 3.7122595  |
| C | -0.3003607 | 1.6060354 | 4.4336771  |
| C | 1.0778709  | 1.4745237 | 4.3045428  |
| S | 4.2461361  | 3.6550586 | 3.5835261  |
| C | 5.7299271  | 3.1076743 | 4.4603575  |
| C | 3.3661748  | 4.3809039 | 4.9884816  |
| C | -2.3847165 | 2.7580453 | 3.8463519  |
| N | -3.5311121 | 2.8812081 | 3.9546009  |
| H | 5.7979121  | 0.7745427 | 2.5830024  |
| H | 3.1287548  | 0.5007849 | 1.9715841  |
| H | 3.4530811  | 3.3282400 | 0.9070610  |
| H | 2.2977147  | 2.0932315 | 0.3891241  |
| H | 4.6320688  | 2.6313005 | -1.0401402 |
| H | 4.0318526  | 0.9731160 | -0.9229493 |
| H | 3.6234328  | 1.4346418 | 4.1335069  |
| H | 1.6641363  | 3.9925171 | 2.0834960  |
| H | -0.7706714 | 4.2422364 | 2.3161600  |

|   |            |           |           |
|---|------------|-----------|-----------|
| H | -0.8597229 | 0.9475659 | 5.0898215 |
| H | 1.5972941  | 0.7049873 | 4.8680278 |
| H | 6.4216594  | 2.7013553 | 3.7260635 |
| H | 6.1512052  | 3.9953894 | 4.9373468 |
| H | 5.4538916  | 2.3612219 | 5.2078337 |
| H | 2.4267062  | 4.8045265 | 4.6345317 |
| H | 4.0054864  | 5.1756403 | 5.3771798 |
| H | 3.1929543  | 3.6168343 | 5.7494488 |

la\_sy\_tr\_10.log

E = -1109.620392  
H = -1109.314675  
G = -1109.379087

NImag=0

|   |            |            |            |
|---|------------|------------|------------|
| C | 4.5251204  | 2.6000321  | 1.5391890  |
| C | 4.3071186  | 1.5485144  | 2.5954493  |
| C | 3.6759482  | 0.3772223  | 1.7952436  |
| C | 4.2133841  | 0.5558277  | 0.3729008  |
| C | 4.5283326  | 2.0583773  | 0.2624582  |
| O | 4.7818885  | 2.5903653  | -0.8631154 |
| C | 3.4354819  | 1.8411589  | 3.8365834  |
| C | 1.9711462  | 2.1631569  | 3.6442595  |
| C | 1.5247499  | 3.0924688  | 2.6939944  |
| C | 0.1657264  | 3.3349088  | 2.5324666  |
| C | -0.7574373 | 2.6491610  | 3.3303775  |
| C | -0.3281399 | 1.7219983  | 4.2862272  |
| C | 1.0333115  | 1.4861660  | 4.4338841  |
| S | 4.1393092  | 3.1301719  | 4.9914758  |
| C | 3.7486401  | 4.7469991  | 4.2956903  |
| C | 5.9214223  | 3.0532914  | 4.7278941  |
| C | -2.1647819 | 2.9003475  | 3.1650099  |
| N | -3.2974223 | 3.1020989  | 3.0324376  |
| H | 4.8654505  | 3.6112324  | 1.7446069  |
| H | 5.2564779  | 1.1814328  | 3.0225382  |
| H | 2.5860020  | 0.4914452  | 1.7844108  |
| H | 3.9061448  | -0.5940624 | 2.2448986  |
| H | 3.5066585  | 0.2363976  | -0.4004539 |
| H | 5.1450737  | -0.0060577 | 0.2169871  |
| H | 3.4972411  | 0.9613788  | 4.4887596  |
| H | 2.2408912  | 3.6173178  | 2.0724925  |
| H | -0.1809258 | 4.0503781  | 1.7940827  |
| H | -1.0514220 | 1.1944814  | 4.8988851  |
| H | 1.3731771  | 0.7612971  | 5.1685555  |
| H | 2.6890126  | 4.9402910  | 4.4643288  |
| H | 4.3455255  | 5.4617146  | 4.8671505  |
| H | 4.0030542  | 4.7904017  | 3.2375487  |
| H | 6.2607802  | 2.0589766  | 5.0217430  |
| H | 6.3595879  | 3.8025046  | 5.3899648  |
| H | 6.1593719  | 3.2656037  | 3.6844751  |

la\_sy\_tr\_11.log

E = -1109.623366  
H = -1109.317970  
G = -1109.382998

NImag=0

|   |           |           |           |
|---|-----------|-----------|-----------|
| C | 4.6602085 | 2.4149752 | 1.4336181 |
| C | 4.3911805 | 1.4414442 | 2.5498569 |
| C | 3.7108372 | 0.2522367 | 1.8257518 |
| C | 4.2338150 | 0.3281383 | 0.3876846 |
| C | 4.6237050 | 1.8046998 | 0.1894962 |

|   |            |            |            |
|---|------------|------------|------------|
| O | 4.8910460  | 2.2583070  | -0.9671481 |
| C | 3.5447513  | 1.9047314  | 3.7598957  |
| C | 2.0894035  | 2.2368535  | 3.5661612  |
| C | 1.6302655  | 3.0312680  | 2.5049225  |
| C | 0.2734859  | 3.2906876  | 2.3555407  |
| C | -0.6372860 | 2.7567128  | 3.2753632  |
| C | -0.1969830 | 1.9628601  | 4.3395343  |
| C | 1.1628264  | 1.7086903  | 4.4747746  |
| S | 4.4759187  | 3.2872944  | 4.5930576  |
| C | 3.7678998  | 3.2840784  | 6.2505285  |
| C | 3.7917041  | 4.8339832  | 3.9681754  |
| C | -2.0426225 | 3.0266496  | 3.1233922  |
| N | -3.1736638 | 3.2440377  | 3.0021830  |
| H | 5.0543887  | 3.4173136  | 1.5889250  |
| H | 5.3238817  | 1.0766391  | 3.0181597  |
| H | 2.6255900  | 0.4036787  | 1.8223610  |
| H | 3.9121771  | -0.7001259 | 2.3266802  |
| H | 3.4993483  | 0.0048280  | -0.3579081 |
| H | 5.1329406  | -0.2883294 | 0.2480972  |
| H | 3.6192096  | 1.1296793  | 4.5330491  |
| H | 2.3382595  | 3.4393976  | 1.7923467  |
| H | -0.0816791 | 3.9030676  | 1.5333606  |
| H | -0.9101721 | 1.5510208  | 5.0456842  |
| H | 1.5096382  | 1.0851513  | 5.2943172  |
| H | 4.0468904  | 2.3450511  | 6.7309603  |
| H | 4.2097173  | 4.1253746  | 6.7879718  |
| H | 2.6830617  | 3.3935705  | 6.1896487  |
| H | 3.9790722  | 4.8923649  | 2.8959237  |
| H | 4.3348475  | 5.6292066  | 4.4835426  |
| H | 2.7252361  | 4.8871632  | 4.1918913  |

la\_sy\_tr\_12.log

E = -1109.623916

H = -1109.318575

G = -1109.384663

NImag=0

|   |            |           |            |
|---|------------|-----------|------------|
| C | 5.0178458  | 0.8142725 | 1.9231682  |
| C | 3.6353226  | 1.3977247 | 1.8205342  |
| C | 3.7664288  | 2.4319547 | 0.6671180  |
| C | 5.0113514  | 2.0072501 | -0.1247148 |
| C | 5.8149353  | 1.1084476 | 0.8295257  |
| O | 6.9910207  | 0.7325576 | 0.5299174  |
| C | 3.1300438  | 1.9276419 | 3.1812706  |
| C | 1.6668909  | 2.2473899 | 3.3371995  |
| C | 0.9465902  | 2.9347662 | 2.3510723  |
| C | -0.4034081 | 3.2105267 | 2.5262667  |
| C | -1.0437500 | 2.7959788 | 3.7007187  |
| C | -0.3410801 | 2.1072353 | 4.6945915  |
| C | 1.0091911  | 1.8374146 | 4.5034489  |
| S | 4.2217364  | 3.3479841 | 3.7202643  |
| C | 4.2448133  | 3.1265488 | 5.5091702  |
| C | 3.2055129  | 4.8363913 | 3.6081558  |
| C | -2.4428724 | 3.0785993 | 3.8852423  |
| N | -3.5683552 | 3.3064612 | 4.0347492  |
| H | 5.2901037  | 0.1050960 | 2.7024656  |
| H | 2.8667235  | 0.6501166 | 1.5549376  |
| H | 3.9229715  | 3.4401837 | 1.0731070  |
| H | 2.8675315  | 2.4777259 | 0.0466413  |
| H | 5.6135413  | 2.8569478 | -0.4653940 |
| H | 4.7464316  | 1.4228275 | -1.0160479 |
| H | 3.3956192  | 1.1764940 | 3.9335672  |

|   |            |           |           |
|---|------------|-----------|-----------|
| H | 1.4369375  | 3.2696224 | 1.4435600 |
| H | -0.9607535 | 3.7430995 | 1.7629902 |
| H | -0.8476236 | 1.7850453 | 5.5982189 |
| H | 1.5585070  | 1.2921821 | 5.2660620 |
| H | 4.8071837  | 2.2159772 | 5.7213343 |
| H | 4.7579421  | 3.9912821 | 5.9342503 |
| H | 3.2236679  | 3.0578534 | 5.8898247 |
| H | 2.9805778  | 5.0253532 | 2.5571930 |
| H | 3.8227267  | 5.6466530 | 4.0028577 |
| H | 2.2928948  | 4.7244952 | 4.1958334 |

1a\_sy\_tr\_13.log

E = -1109.625495

H = -1109.319769

G = -1109.383970

NImag=0

|   |            |            |            |
|---|------------|------------|------------|
| C | 4.8612448  | 0.6405883  | 1.7534507  |
| C | 3.5339527  | 1.3358576  | 1.6549513  |
| C | 3.7799327  | 2.4364509  | 0.5753401  |
| C | 5.3026679  | 2.5314518  | 0.3876646  |
| C | 5.8827425  | 1.2838725  | 1.0729421  |
| O | 7.1170627  | 1.0024227  | 0.9681284  |
| C | 3.0601293  | 1.8535118  | 3.0362389  |
| C | 1.6060500  | 2.2083974  | 3.2146017  |
| C | 0.8323139  | 2.7098958  | 2.1603328  |
| C | -0.5063657 | 3.0279723  | 2.3558415  |
| C | -1.0806370 | 2.8410205  | 3.6185520  |
| C | -0.3267923 | 2.3261111  | 4.6790497  |
| C | 1.0086539  | 2.0075552  | 4.4659603  |
| S | 4.2007726  | 3.2607445  | 3.5115732  |
| C | 4.4503116  | 2.9893240  | 5.2759948  |
| C | 3.1621885  | 4.7366273  | 3.5523913  |
| C | -2.4656242 | 3.1723705  | 3.8256169  |
| N | -3.5797154 | 3.4404200  | 3.9930109  |
| H | 4.9982041  | -0.2612242 | 2.3463923  |
| H | 2.7123643  | 0.6767454  | 1.3366723  |
| H | 3.3345075  | 3.4023757  | 0.8413503  |
| H | 3.2989952  | 2.1251356  | -0.3567612 |
| H | 5.7307801  | 3.4286507  | 0.8548987  |
| H | 5.5941641  | 2.5532384  | -0.6682126 |
| H | 3.3265035  | 1.1018535  | 3.7870663  |
| H | 1.2659253  | 2.8523530  | 1.1762704  |
| H | -1.1055541 | 3.4152818  | 1.5385070  |
| H | -0.7853851 | 2.1719821  | 5.6500910  |
| H | 1.5952327  | 1.5907021  | 5.2802761  |
| H | 5.0146905  | 2.0614051  | 5.3843134  |
| H | 5.0359967  | 3.8301642  | 5.6525030  |
| H | 3.4879596  | 2.9291657  | 5.7875081  |
| H | 2.8209020  | 4.9406999  | 2.5361578  |
| H | 3.8067293  | 5.5495222  | 3.8939302  |
| H | 2.3196958  | 4.5983545  | 4.2321956  |

1a\_sy\_tr\_14.log

E = -1109.619529

H = -1109.313997

G = -1109.378647

NImag=0

|   |           |           |           |
|---|-----------|-----------|-----------|
| C | 5.0280423 | 1.0588229 | 2.0674048 |
| C | 3.5670868 | 1.3548614 | 2.2064423 |
| C | 3.1878138 | 2.1049671 | 0.8929182 |

|   |            |           |            |
|---|------------|-----------|------------|
| C | 4.4765639  | 2.2048769 | 0.0580252  |
| C | 5.5752842  | 1.5102878 | 0.8803513  |
| O | 6.7626150  | 1.4323475 | 0.4307852  |
| C | 3.1423041  | 2.0618150 | 3.5304891  |
| C | 1.6516516  | 2.3068692 | 3.6064085  |
| C | 1.0457458  | 3.4904651 | 3.1705728  |
| C | -0.3367758 | 3.6319456 | 3.2016364  |
| C | -1.1247156 | 2.5738020 | 3.6669245  |
| C | -0.5346977 | 1.3815175 | 4.1030359  |
| C | 0.8482087  | 1.2590246 | 4.0728494  |
| S | 4.0331747  | 3.6041321 | 4.0376214  |
| C | 4.6614604  | 4.4630595 | 2.5781047  |
| C | 5.5744369  | 2.9919806 | 4.7476100  |
| C | -2.5558585 | 2.7145312 | 3.7002648  |
| N | -3.7082188 | 2.8275127 | 3.7270909  |
| H | 5.5828087  | 0.5011701 | 2.8184604  |
| H | 2.9539032  | 0.4409235 | 2.2825040  |
| H | 2.7589992  | 3.0911349 | 1.0940972  |
| H | 2.4119107  | 1.5440168 | 0.3647082  |
| H | 4.7712342  | 3.2418739 | -0.1527330 |
| H | 4.3828895  | 1.7039125 | -0.9124564 |
| H | 3.4268797  | 1.3979576 | 4.3555187  |
| H | 1.6387462  | 4.3227270 | 2.7998199  |
| H | -0.8029770 | 4.5522983 | 2.8664162  |
| H | -1.1535275 | 0.5681677 | 4.4670867  |
| H | 1.3130920  | 0.3399977 | 4.4186523  |
| H | 3.8207536  | 4.8587450 | 2.0079554  |
| H | 5.2551974  | 5.2911858 | 2.9725006  |
| H | 5.2782198  | 3.7859814 | 1.9893951  |
| H | 5.3174961  | 2.3289393 | 5.5753176  |
| H | 6.1070284  | 3.8674229 | 5.1256089  |
| H | 6.1480240  | 2.4717268 | 3.9812128  |

la\_sy\_tr\_15.log

E = -1109.623600

H = -1109.317826

G = -1109.382813

NImag=0

|   |            |           |            |
|---|------------|-----------|------------|
| C | 3.4698261  | 1.5069331 | 1.0888579  |
| C | 3.9670263  | 2.5964576 | 2.0133878  |
| C | 5.5044338  | 2.4144561 | 1.9581959  |
| C | 5.7765365  | 1.7606253 | 0.5995378  |
| C | 4.4665553  | 1.0374432 | 0.2458822  |
| O | 4.4181388  | 0.2050366 | -0.7116332 |
| C | 3.3723932  | 2.4136086 | 3.4144855  |
| C | 1.8577663  | 2.4009251 | 3.4603628  |
| C | 1.1029045  | 3.2995891 | 2.6971750  |
| C | -0.2853583 | 3.2827100 | 2.7600998  |
| C | -0.9233493 | 2.3549796 | 3.5917689  |
| C | -0.1813840 | 1.4489049 | 4.3583877  |
| C | 1.2059593  | 1.4812302 | 4.2887431  |
| S | 3.8617310  | 3.6914517 | 4.6971756  |
| C | 4.0300098  | 5.2402949 | 3.7907556  |
| C | 5.5756475  | 3.3329639 | 5.1328567  |
| C | -2.3607473 | 2.3300978 | 3.6565357  |
| N | -3.5174463 | 2.3111061 | 3.7095043  |
| H | 2.4164197  | 1.2689088 | 0.9696284  |
| H | 3.7006316  | 3.6069148 | 1.6612380  |
| H | 5.8093695  | 1.7276955 | 2.7577779  |
| H | 6.0468208  | 3.3554828 | 2.0978207  |
| H | 6.6256708  | 1.0690881 | 0.6160993  |



|   |            |           |            |
|---|------------|-----------|------------|
| H | 5.9822667  | 2.5093964 | -0.1779328 |
| H | 3.7567527  | 1.4901204 | 3.8644458  |
| H | 1.5934101  | 4.0129059 | 2.0414697  |
| H | -0.8732271 | 3.9764716 | 2.1683052  |
| H | -0.6876215 | 0.7311637 | 4.9952415  |
| H | 1.7909609  | 0.7810775 | 4.8789535  |
| H | 3.0549498  | 5.4942940 | 3.3710471  |
| H | 4.3212472  | 5.9935230 | 4.5257925  |
| H | 4.7874750  | 5.1447383 | 3.0125033  |
| H | 5.6194965  | 2.2958945 | 5.4701578  |
| H | 5.8230020  | 4.0008383 | 5.9606421  |
| H | 6.2380322  | 3.5054726 | 4.2866311  |

1a\_sy\_tr\_15\_ts2.log  
E = -1109.615788  
H = -1109.311787  
G = -1109.376805

NImag=1

|   |            |            |            |
|---|------------|------------|------------|
| C | 1.6262229  | 1.8075266  | 0.6162962  |
| C | 1.9069105  | 0.3228913  | 0.6615783  |
| C | 3.3676654  | 0.2267981  | 0.1671896  |
| C | 3.5962600  | 1.4822175  | -0.6850305 |
| C | 2.5570589  | 2.4914185  | -0.1805629 |
| O | 2.6055128  | 3.7097095  | -0.4848327 |
| C | 0.9116255  | -0.0706784 | -0.3815512 |
| C | -0.5481986 | 0.1408316  | -0.1745148 |
| C | -1.1022638 | 0.2611693  | 1.1086719  |
| C | -2.4740710 | 0.3857543  | 1.2729058  |
| C | -3.3065393 | 0.3803366  | 0.1450349  |
| C | -2.7694880 | 0.2564230  | -1.1416156 |
| C | -1.3936895 | 0.1390972  | -1.2919516 |
| S | 0.8339468  | -2.2881397 | -0.6775993 |
| C | -0.2902519 | -2.8067472 | 0.6383191  |
| C | 2.3714796  | -2.9604212 | -0.0041499 |
| C | -4.7296054 | 0.5051187  | 0.3116543  |
| N | -5.8758429 | 0.6045141  | 0.4455776  |
| H | 0.7553743  | 2.2704895  | 1.0646545  |
| H | 1.7407548  | -0.1792327 | 1.6204327  |
| H | 3.5741974  | -0.6950142 | -0.3803910 |
| H | 4.0204902  | 0.2455068  | 1.0455689  |
| H | 3.4228603  | 1.2955356  | -1.7531235 |
| H | 4.6079274  | 1.8876905  | -0.5884186 |
| H | 1.2386582  | 0.1361533  | -1.4012436 |
| H | -0.4609569 | 0.2610688  | 1.9846623  |
| H | -2.9046397 | 0.4833540  | 2.2639498  |
| H | -3.4235116 | 0.2562680  | -2.0071599 |
| H | -0.9667915 | 0.0453248  | -2.2870154 |
| H | -1.3043253 | -2.5149417 | 0.3618614  |
| H | -0.2335113 | -3.8948407 | 0.7145953  |
| H | -0.0035529 | -2.3459135 | 1.5866837  |
| H | 3.1621394  | -2.8225350 | -0.7418412 |
| H | 2.2166970  | -4.0291220 | 0.1609942  |
| H | 2.6272069  | -2.4678904 | 0.9363912  |

1a\_sy\_tr\_16.log  
E = -1109.616295  
H = -1109.310697  
G = -1109.375284

NImag=0

|   |           |           |           |
|---|-----------|-----------|-----------|
| C | 4.8502958 | 0.7150452 | 1.6979242 |
|---|-----------|-----------|-----------|

|   |            |            |            |
|---|------------|------------|------------|
| C | 3.5514827  | 1.4648898  | 1.7550154  |
| C | 3.7707126  | 2.6887537  | 0.8096827  |
| C | 5.1803363  | 2.5344110  | 0.2108208  |
| C | 5.7944827  | 1.2907707  | 0.8718961  |
| O | 6.9929166  | 0.9509741  | 0.6114717  |
| C | 3.0747602  | 1.7307196  | 3.2030889  |
| C | 1.6197529  | 2.0959005  | 3.4025600  |
| C | 0.9207892  | 2.8582232  | 2.4593242  |
| C | -0.4114845 | 3.1918717  | 2.6719088  |
| C | -1.0494368 | 2.7633188  | 3.8417910  |
| C | -0.3653377 | 1.9978427  | 4.7926683  |
| C | 0.9645016  | 1.6667709  | 4.5631495  |
| S | 4.0431871  | 2.9485029  | 4.2632401  |
| C | 3.2702356  | 4.5638817  | 4.0322663  |
| C | 5.6781095  | 3.2507450  | 3.5534569  |
| C | -2.4278985 | 3.1104441  | 4.0668359  |
| N | -3.5367598 | 3.3906699  | 4.2481104  |
| H | 5.0171096  | -0.1910025 | 2.2769036  |
| H | 2.7017915  | 0.8693698  | 1.3768690  |
| H | 3.6704225  | 3.6369654  | 1.3453555  |
| H | 3.0041355  | 2.7013869  | 0.0300667  |
| H | 5.8222958  | 3.4071299  | 0.3893329  |
| H | 5.1528521  | 2.3873047  | -0.8754962 |
| H | 3.2683416  | 0.8136285  | 3.7694542  |
| H | 1.4105372  | 3.1988674  | 1.5536745  |
| H | -0.9557426 | 3.7804633  | 1.9408723  |
| H | -0.8719323 | 1.6644845  | 5.6921610  |
| H | 1.4985058  | 1.0631250  | 5.2926848  |
| H | 2.2899548  | 4.5423425  | 4.5094850  |
| H | 3.9162755  | 5.2735312  | 4.5537125  |
| H | 3.1915651  | 4.8214341  | 2.9762464  |
| H | 6.2421557  | 2.3204014  | 3.5849714  |
| H | 6.1308332  | 3.9943693  | 4.2143261  |
| H | 5.5998538  | 3.6356630  | 2.5382693  |

la\_sy\_tr\_17.log

E = -1109.624947

H = -1109.319485

G = -1109.384888

NImag=0

|   |            |            |            |
|---|------------|------------|------------|
| C | 3.3667570  | 1.8337283  | 0.8288459  |
| C | 4.0628032  | 2.8315892  | 1.7194473  |
| C | 5.5510800  | 2.3969728  | 1.6086859  |
| C | 5.5171480  | 0.9158292  | 1.2155141  |
| C | 4.1463132  | 0.7210656  | 0.5493164  |
| O | 3.8791165  | -0.3336794 | -0.1055522 |
| C | 3.5261044  | 2.7279165  | 3.1748868  |
| C | 2.0224882  | 2.6182334  | 3.2800163  |
| C | 1.4525302  | 1.5675759  | 4.0029607  |
| C | 0.0706022  | 1.4478990  | 4.1047120  |
| C | -0.7441117 | 2.3991996  | 3.4818032  |
| C | -0.1855746 | 3.4629285  | 2.7606521  |
| C | 1.1954808  | 3.5661338  | 2.6639554  |
| S | 3.9341219  | 4.2632625  | 4.1623321  |
| C | 5.7200981  | 4.2376449  | 4.4091856  |
| C | 3.3817366  | 3.8043593  | 5.8176932  |
| C | -2.1748783 | 2.2838722  | 3.5831106  |
| N | -3.3263398 | 2.1912293  | 3.6654468  |
| H | 2.3252356  | 1.9306448  | 0.5357618  |
| H | 3.9368419  | 3.8757314  | 1.3942472  |
| H | 6.1251663  | 2.5724860  | 2.5207427  |

|   |            |           |           |
|---|------------|-----------|-----------|
| H | 6.0173937  | 2.9835337 | 0.8104025 |
| H | 5.5883472  | 0.2531192 | 2.0890994 |
| H | 6.3281817  | 0.6376549 | 0.5340143 |
| H | 4.0046514  | 1.8993692 | 3.7110797 |
| H | 2.0944128  | 0.8345037 | 4.4829673 |
| H | -0.3750276 | 0.6286384 | 4.6590941 |
| H | -0.8299908 | 4.1924245 | 2.2816872 |
| H | 1.6290467  | 4.3843725 | 2.0945224 |
| H | 6.2009001  | 4.5465131 | 3.4811159 |
| H | 5.9268326  | 4.9739715 | 5.1890988 |
| H | 6.0410004  | 3.2423715 | 4.7220563 |
| H | 2.2913049  | 3.8028161 | 5.8233814 |
| H | 3.7542913  | 4.5705462 | 6.5003800 |
| H | 3.7818358  | 2.8222429 | 6.0779366 |

la\_sy\_tr\_17\_ts2.log

E = -1109.618448

H = -1109.314824

G = -1109.380760

NImag=1

|   |            |            |            |
|---|------------|------------|------------|
| C | 1.8765822  | -1.6479354 | -0.6383780 |
| C | 1.9007946  | -0.1675490 | -0.9352113 |
| C | 3.3513205  | 0.2451467  | -0.6205621 |
| C | 3.8496565  | -0.7896704 | 0.3976962  |
| C | 2.9683995  | -2.0265650 | 0.1625001  |
| O | 3.2472463  | -3.1475429 | 0.6532522  |
| C | 0.9420985  | 0.1964365  | 0.1445031  |
| C | -0.4874998 | -0.1914748 | 0.0726638  |
| C | -1.2218607 | -0.3154386 | 1.2609655  |
| C | -2.5710538 | -0.6432090 | 1.2319804  |
| C | -3.1962233 | -0.8495955 | -0.0035357 |
| C | -2.4773171 | -0.7314050 | -1.2009020 |
| C | -1.1300766 | -0.4018680 | -1.1577431 |
| S | 0.8092613  | 2.4537461  | 0.1255905  |
| C | -0.2750758 | 2.8531135  | 1.5113578  |
| C | -0.3029496 | 2.7951134  | -1.2528512 |
| C | -4.5929861 | -1.1905976 | -0.0444978 |
| N | -5.7181389 | -1.4637604 | -0.0771135 |
| H | 1.0683417  | -2.3087695 | -0.9294622 |
| H | 1.5703786  | 0.1441678  | -1.9305840 |
| H | 3.4288596  | 1.2781254  | -0.2670168 |
| H | 3.9300956  | 0.1648449  | -1.5459026 |
| H | 3.7159627  | -0.4519307 | 1.4340909  |
| H | 4.9073790  | -1.0398045 | 0.2737986  |
| H | 1.3622938  | 0.1676776  | 1.1505776  |
| H | -0.7249803 | -0.1599929 | 2.2149031  |
| H | -3.1366892 | -0.7432382 | 2.1522977  |
| H | -2.9747679 | -0.8967509 | -2.1508082 |
| H | -0.5765475 | -0.3129233 | -2.0874661 |
| H | 0.2296505  | 2.5516198  | 2.4313423  |
| H | -0.4441111 | 3.9321798  | 1.5242492  |
| H | -1.2269322 | 2.3265345  | 1.4097145  |
| H | 0.1814571  | 2.4567694  | -2.1709674 |
| H | -0.4713134 | 3.8731292  | -1.3058532 |
| H | -1.2520171 | 2.2733738  | -1.1091832 |

la\_sy\_tr\_18.log

E = -1109.617759

H = -1109.312020

G = -1109.375792

NImag=0

|   |            |            |            |
|---|------------|------------|------------|
| C | 4.8056861  | 0.7852582  | 1.5901890  |
| C | 3.4835798  | 1.4905430  | 1.6773559  |
| C | 3.6549517  | 2.6966389  | 0.7053910  |
| C | 5.1645684  | 2.8439082  | 0.4672995  |
| C | 5.7874030  | 1.5290193  | 0.9643602  |
| O | 7.0289676  | 1.3023398  | 0.8039173  |
| C | 3.0356314  | 1.7734184  | 3.1331454  |
| C | 1.5706892  | 2.1151957  | 3.3536777  |
| C | 0.7821161  | 2.6737315  | 2.3421245  |
| C | -0.5608996 | 2.9575278  | 2.5692629  |
| C | -1.1210108 | 2.6807241  | 3.8200220  |
| C | -0.3477950 | 2.1147422  | 4.8411597  |
| C | 0.9895769  | 1.8340055  | 4.5981090  |
| S | 3.9584271  | 3.0090466  | 4.1789068  |
| C | 3.8038497  | 4.6313756  | 3.4083764  |
| C | 5.7337425  | 2.7031338  | 4.0542603  |
| C | -2.5098520 | 2.9733515  | 4.0580417  |
| N | -3.6271442 | 3.2095247  | 4.2501315  |
| H | 4.9896169  | -0.1617523 | 2.0933885  |
| H | 2.6436122  | 0.8678987  | 1.3278605  |
| H | 3.1860672  | 3.6163556  | 1.0639852  |
| H | 3.1553119  | 2.4406158  | -0.2342128 |
| H | 5.6103806  | 3.6836444  | 1.0210806  |
| H | 5.4085866  | 3.0093638  | -0.5878691 |
| H | 3.2512621  | 0.8673863  | 3.7142626  |
| H | 1.2008631  | 2.8828911  | 1.3645550  |
| H | -1.1719862 | 3.3875124  | 1.7826751  |
| H | -0.7942854 | 1.8927398  | 5.8046152  |
| H | 1.5885546  | 1.3807892  | 5.3841153  |
| H | 2.7489932  | 4.8017929  | 3.1829964  |
| H | 4.1380500  | 5.3499369  | 4.1594842  |
| H | 4.4236919  | 4.6966579  | 2.5153566  |
| H | 5.9164831  | 1.6715687  | 4.3578590  |
| H | 6.1895326  | 3.3906643  | 4.7712686  |
| H | 6.0995776  | 2.8871498  | 3.0459483  |

la\_sy\_tr\_1\_ts1.log

E = -1109.598903  
H = -1109.296457  
G = -1109.362268

NImag=1

|   |            |            |            |
|---|------------|------------|------------|
| C | 2.5670005  | -1.4077189 | 1.0989586  |
| C | 1.2418092  | -1.3537804 | 0.6708458  |
| C | 1.1676750  | -1.7546672 | -0.7928676 |
| C | 2.6077117  | -1.5833559 | -1.2909187 |
| C | 3.4544996  | -1.5295115 | -0.0155889 |
| O | 4.6947788  | -1.5638567 | -0.0209458 |
| C | 0.3733495  | 0.6420800  | 0.6930609  |
| C | -1.0183133 | 0.3807506  | 0.4064611  |
| C | -1.6108835 | 0.4970080  | -0.8753628 |
| C | -2.9256829 | 0.1246092  | -1.0970656 |
| C | -3.7024133 | -0.3848434 | -0.0440748 |
| C | -3.1373749 | -0.5142617 | 1.2358189  |
| C | -1.8246544 | -0.1368007 | 1.4518750  |
| S | 1.1949653  | 1.7217506  | -0.4217691 |
| C | 2.8562401  | 1.8455776  | 0.2690537  |
| C | 0.5999752  | 3.3932324  | -0.0349734 |
| C | -5.0629215 | -0.7651076 | -0.2721780 |
| N | -6.1662370 | -1.0745048 | -0.4568194 |
| H | 2.9052710  | -1.2962331 | 2.1236636  |

|   |            |            |            |
|---|------------|------------|------------|
| H | 0.4089917  | -1.5897829 | 1.3292877  |
| H | 0.4307123  | -1.1800623 | -1.3616046 |
| H | 0.8622622  | -2.8065299 | -0.8451077 |
| H | 2.7435560  | -0.6379608 | -1.8345287 |
| H | 2.9495356  | -2.3859126 | -1.9502601 |
| H | 0.6110928  | 0.8947655  | 1.7263177  |
| H | -1.0406887 | 0.8872392  | -1.7143354 |
| H | -3.3598795 | 0.2278442  | -2.0867073 |
| H | -3.7356047 | -0.9047076 | 2.0534213  |
| H | -1.3998172 | -0.2298035 | 2.4477684  |
| H | 3.4377054  | 0.9755740  | -0.0301141 |
| H | 3.3006854  | 2.7484657  | -0.1535983 |
| H | 2.7895139  | 1.9184611  | 1.3566132  |
| H | -0.4620255 | 3.4243291  | -0.2847528 |
| H | 1.1520468  | 4.1037478  | -0.6545346 |
| H | 0.7562492  | 3.5876829  | 1.0281989  |

la\_sy\_tr\_1\_ts2.log

E = -1109.609852

H = -1109.305550

G = -1109.370427

NImag=1

|   |            |            |            |
|---|------------|------------|------------|
| C | -1.5632511 | 2.0112265  | 0.9927931  |
| C | -2.1134055 | 0.8144946  | 0.2594842  |
| C | -0.8863468 | 2.8870867  | 0.1272315  |
| O | -0.2570783 | 3.9392993  | 0.3949894  |
| C | -1.0983760 | -0.1260630 | 0.8274866  |
| C | 0.3558764  | -0.1624594 | 0.4916443  |
| C | 0.8507578  | -0.1784193 | -0.8211246 |
| C | 2.2168258  | -0.2573026 | -1.0624243 |
| C | 3.1060019  | -0.3393915 | 0.0147809  |
| C | 2.6306651  | -0.3511947 | 1.3321510  |
| C | 1.2643042  | -0.2691634 | 1.5574731  |
| C | -1.0397403 | 2.3780210  | -1.3125514 |
| C | -2.0437737 | 1.2153124  | -1.2280784 |
| S | -1.6669180 | -2.2828929 | 0.4379482  |
| C | -3.4411827 | -2.1244961 | 0.1355928  |
| C | -1.1168607 | -2.6908701 | -1.2337642 |
| C | 4.5198811  | -0.4250210 | -0.2344405 |
| N | 5.6586105  | -0.4945779 | -0.4347357 |
| H | -1.6529374 | 2.1500098  | 2.0645798  |
| H | -3.1168606 | 0.5043050  | 0.5604823  |
| H | -1.2620235 | -0.2702212 | 1.8953152  |
| H | 0.1757585  | -0.1481010 | -1.6673880 |
| H | 2.5933431  | -0.2654931 | -2.0798775 |
| H | 3.3252514  | -0.4224281 | 2.1624943  |
| H | 0.8907690  | -0.2742660 | 2.5775381  |
| H | -1.3947277 | 3.1906711  | -1.9544050 |
| H | -0.0560488 | 2.0787872  | -1.6940379 |
| H | -1.8120364 | 0.3747378  | -1.8889733 |
| H | -3.0399349 | 1.5719728  | -1.5068508 |
| H | -3.8385299 | -3.1094984 | -0.1191777 |
| H | -3.9113895 | -1.7694895 | 1.0543284  |
| H | -3.6233260 | -1.4222265 | -0.6809580 |
| H | -1.5913977 | -3.6312449 | -1.5246827 |
| H | -0.0343469 | -2.8238886 | -1.2145668 |
| H | -1.3942483 | -1.8993650 | -1.9326445 |

la\_sy\_tr\_2.log

E = -1109.625716

```

H =      -1109.320001
G =      -1109.384735
NImag=0
C      4.9556630      0.8211800      1.9090951
C      3.5063472      1.1982286      1.9796295
C      3.2722385      1.9474153      0.6406581
C      4.6584416      2.4313018      0.1876000
C      5.6572079      1.5761716      0.9855154
O      6.9096217      1.6785008      0.7893015
C      3.1688329      2.0169934      3.2641302
C      1.6967460      2.3139669      3.4286002
C      1.0471048      3.3864612      2.8038913
C      -0.3255805      3.5563457      2.9374259
C      -1.0618076      2.6395751      3.6964757
C      -0.4283563      1.5627000      4.3266325
C      0.9461863      1.4123629      4.1928061
S      4.1525946      3.5893596      3.3203038
C      5.7984281      3.1003903      3.8972958
C      3.5349608      4.3312496      4.8490014
C      -2.4835039      2.8099045      3.8354523
N      -3.6281360      2.9462852      3.9473739
H      5.4344547      0.2119964      2.6728286
H      2.8164361      0.3451307      2.0621951
H      2.5356209      2.7527432      0.7158659
H      2.8767455      1.2261879      -0.0807683
H      4.8353012      3.4919709      0.4158468
H      4.8177106      2.3113148      -0.8896865
H      3.5215726      1.4552659      4.1367582
H      1.6000378      4.1125489      2.2135476
H      -0.8245585      4.3918640      2.4580868
H      -1.0057496      0.8602429      4.9184641
H      1.4452269      0.5829775      4.6859009
H      6.3822946      2.7622220      3.0408046
H      6.2371887      4.0008691      4.3339517
H      5.6955227      2.3152823      4.6489132
H      2.5279504      4.7094670      4.6752864
H      4.2046618      5.1594912      5.0869889
H      3.5446947      3.5823329      5.6440274

```

```

1a_sy_tr_2_ts2.log
E =      -1109.613865
H =      -1109.310184
G =      -1109.376054
NImag=1
C      1.6916791      1.9525600      -0.9442660
C      2.1501405      0.9683281      0.1021292
C      0.7968116      2.8959581      -0.4062904
O      0.1540484      3.8014139      -0.9885686
C      1.2522319      -0.1029802      -0.4144344
C      -0.2304188      -0.1496537      -0.2249119
C      -0.8250270      -0.2194307      1.0425723
C      -2.2043494      -0.3312551      1.1724536
C      -3.0019590      -0.3840487      0.0241595
C      -2.4238443      -0.3375133      -1.2509907
C      -1.0446238      -0.2311314      -1.3643523
C      0.6941743      2.6690170      1.1092384
C      1.7950502      1.6476665      1.4373427
S      1.8331079      -2.0534685      0.5292753
C      0.8436672      -3.1350816      -0.5260440
C      3.4441263      -2.2293138      -0.2678199
C      -4.4298313      -0.4978917      0.1546160

```

|   |            |            |            |
|---|------------|------------|------------|
| N | -5.5796982 | -0.5898715 | 0.2592751  |
| H | 1.9748863  | 1.8952343  | -1.9894090 |
| H | 3.1984481  | 0.6577508  | 0.0489302  |
| H | 1.5501090  | -0.4482203 | -1.4065016 |
| H | -0.2145464 | -0.2031117 | 1.9390836  |
| H | -2.6614084 | -0.3833882 | 2.1550060  |
| H | -3.0499878 | -0.3871004 | -2.1355533 |
| H | -0.5873093 | -0.1978833 | -2.3492671 |
| H | 0.8294488  | 3.6176257  | 1.6381802  |
| H | -0.3140189 | 2.3086476  | 1.3485833  |
| H | 1.5291921  | 0.9370687  | 2.2254810  |
| H | 2.6930452  | 2.1757439  | 1.7723346  |
| H | 1.2299061  | -4.1537284 | -0.4539763 |
| H | -0.1854263 | -3.1087338 | -0.1624206 |
| H | 0.8863415  | -2.7860158 | -1.5617301 |
| H | 3.7347106  | -3.2816532 | -0.2507786 |
| H | 4.1677748  | -1.6445092 | 0.3018578  |
| H | 3.3952532  | -1.8685059 | -1.2990712 |

la\_sy\_tr\_3.log

E = -1109.629946

H = -1109.324552

G = -1109.389085

NImag=0

|   |            |            |            |
|---|------------|------------|------------|
| C | 4.5856214  | 2.3975522  | 1.4594287  |
| C | 4.5232885  | 1.5967453  | 2.7266279  |
| C | 3.8642288  | 0.2669776  | 2.2715795  |
| C | 3.0768909  | 0.6182280  | 1.0032556  |
| C | 3.7344315  | 1.9084985  | 0.4773793  |
| O | 3.4509121  | 2.3609451  | -0.6740201 |
| C | 3.6807801  | 2.2365391  | 3.8796758  |
| C | 2.2100351  | 2.3866653  | 3.5870123  |
| C | 1.3157249  | 1.5034976  | 4.2028390  |
| C | -0.0390079 | 1.5343474  | 3.8957878  |
| C | -0.5064738 | 2.4737136  | 2.9690535  |
| C | 0.3706213  | 3.3820527  | 2.3648216  |
| C | 1.7239395  | 3.3369350  | 2.6782231  |
| S | 4.3585506  | 3.9074864  | 4.2504966  |
| C | 6.0573983  | 3.5413304  | 4.7259533  |
| C | 3.6179506  | 4.2387449  | 5.8605304  |
| C | -1.9074763 | 2.5149574  | 2.6437447  |
| N | -3.0352883 | 2.5476668  | 2.3821846  |
| H | 5.1304761  | 3.3357508  | 1.3706747  |
| H | 5.5008703  | 1.3847956  | 3.1794738  |
| H | 3.2558775  | -0.1942702 | 3.0576724  |
| H | 4.6672651  | -0.4353379 | 2.0266713  |
| H | 2.0157987  | 0.8184176  | 1.2097790  |
| H | 3.1156461  | -0.1725510 | 0.2461267  |
| H | 3.8185743  | 1.6642593  | 4.8051427  |
| H | 1.6869450  | 0.7778683  | 4.9209596  |
| H | -0.7291590 | 0.8432453  | 4.3679372  |
| H | -0.0063391 | 4.1119752  | 1.6560611  |
| H | 2.4000568  | 4.0366592  | 2.1984898  |
| H | 6.6307598  | 3.3494869  | 3.8186767  |
| H | 6.4423592  | 4.4329149  | 5.2247020  |
| H | 6.0735737  | 2.6812348  | 5.3982975  |
| H | 2.5439621  | 4.3651814  | 5.7112492  |
| H | 4.0519457  | 5.1689727  | 6.2315625  |
| H | 3.8275604  | 3.4089140  | 6.5382502  |

la\_sy\_tr\_3\_ts1.log  
E = -1109.604033  
H = -1109.301434  
G = -1109.366342

NImag=1

|   |            |            |            |
|---|------------|------------|------------|
| C | -1.1598034 | 2.1085941  | -0.5378447 |
| C | -1.4548702 | 1.5817338  | 0.7166977  |
| C | -0.3331885 | 1.9119265  | 1.6865087  |
| C | 0.8299730  | 2.3549742  | 0.7876665  |
| C | 0.1950300  | 2.5768811  | -0.5895233 |
| O | 0.7917169  | 3.1149679  | -1.5340570 |
| C | -1.3530961 | -0.6146096 | 0.6784298  |
| C | 0.0324454  | -0.8557550 | 0.3745592  |
| C | 0.9281691  | -1.1740418 | 1.4285435  |
| C | 2.2917545  | -1.2337817 | 1.2235982  |
| C | 2.8187202  | -0.9867390 | -0.0594657 |
| C | 1.9523588  | -0.7062741 | -1.1258888 |
| C | 0.5842683  | -0.6435111 | -0.9141263 |
| S | -2.4818680 | -1.0154174 | -0.6027150 |
| C | -4.0467256 | -0.3055033 | -0.0582010 |
| C | -2.8580560 | -2.7740337 | -0.3893915 |
| C | 4.2320399  | -1.0452271 | -0.2782377 |
| N | 5.3785584  | -1.0920236 | -0.4531611 |
| H | -1.8347537 | 2.1449496  | -1.3877170 |
| H | -2.4636335 | 1.4997523  | 1.1083184  |
| H | -0.0835269 | 1.0784243  | 2.3488819  |
| H | -0.6719541 | 2.7380563  | 2.3231554  |
| H | 1.6076461  | 1.5865063  | 0.6982301  |
| H | 1.3139263  | 3.2756843  | 1.1274439  |
| H | -1.7164856 | -0.9385354 | 1.6543834  |
| H | 0.5267024  | -1.3642389 | 2.4202036  |
| H | 2.9603917  | -1.4728093 | 2.0448614  |
| H | 2.3584101  | -0.5274171 | -2.1170002 |
| H | -0.0613158 | -0.4167880 | -1.7564937 |
| H | -4.0439171 | 0.7598855  | -0.2882007 |
| H | -4.8349318 | -0.8003272 | -0.6284612 |
| H | -4.1757515 | -0.4827946 | 1.0116818  |
| H | -1.9365799 | -3.3254959 | -0.5843764 |
| H | -3.6234073 | -3.0518264 | -1.1174366 |
| H | -3.2047814 | -2.9442253 | 0.6317825  |

la\_sy\_tr\_3\_ts1\_rot1.log

E = -1109.598903  
H = -1109.296458  
G = -1109.362272

NImag=1

|   |            |            |            |
|---|------------|------------|------------|
| C | -2.5486144 | 1.4362597  | 1.1271682  |
| C | -1.2205710 | 1.3634999  | 0.7108713  |
| C | -1.1219897 | 1.8018932  | -0.7405896 |
| C | -2.5602077 | 1.6770294  | -1.2573421 |
| C | -3.4213605 | 1.6083747  | 0.0076077  |
| O | -4.6604133 | 1.6713132  | -0.0090846 |
| C | -0.3979011 | -0.6517375 | 0.6873724  |
| C | 1.0022609  | -0.4147840 | 0.4217567  |
| C | 1.8091070  | 0.0557966  | 1.4887589  |
| C | 3.1322393  | 0.4087373  | 1.2960175  |
| C | 3.7076069  | 0.3009269  | 0.0187259  |
| C | 2.9306252  | -0.1620254 | -1.0553407 |
| C | 1.6054759  | -0.5100181 | -0.8568378 |
| S | -1.2319866 | -1.6818350 | -0.4644747 |
| C | -2.9028908 | -1.7860960 | 0.2060129  |



|   |            |            |            |
|---|------------|------------|------------|
| C | -0.6792832 | -3.3763710 | -0.1172513 |
| C | 5.0786952  | 0.6559076  | -0.1855177 |
| N | 6.1906106  | 0.9447907  | -0.3507930 |
| H | -2.9000734 | 1.3050149  | 2.1450716  |
| H | -0.3895663 | 1.5624445  | 1.3836848  |
| H | -0.3922481 | 1.2261361  | -1.3174151 |
| H | -0.7923762 | 2.8475290  | -0.7611706 |
| H | -2.7116484 | 0.7498689  | -1.8275917 |
| H | -2.8768463 | 2.5045621  | -1.8981210 |
| H | -0.6522023 | -0.9265883 | 1.7109819  |
| H | 1.3760583  | 0.1316576  | 2.4825665  |
| H | 3.7305454  | 0.7631973  | 2.1297972  |
| H | 3.3727280  | -0.2484783 | -2.0430889 |
| H | 1.0354248  | -0.8643051 | -1.7117046 |
| H | -3.4611135 | -0.8949646 | -0.0746650 |
| H | -3.3633363 | -2.6664691 | -0.2460009 |
| H | -2.8494385 | -1.8904494 | 1.2917372  |
| H | 0.3843438  | -3.4251728 | -0.3570844 |
| H | -1.2407178 | -4.0570676 | -0.7613904 |
| H | -0.8513000 | -3.5956964 | 0.9386252  |

la\_sy\_tr\_4.log

E = -1109.626523

H = -1109.321249

G = -1109.387140

NImag=0

|   |            |            |            |
|---|------------|------------|------------|
| C | 4.4137503  | 2.5147135  | 1.3645747  |
| C | 4.3353540  | 1.6646127  | 2.6032693  |
| C | 3.7314689  | 0.3382556  | 2.0793902  |
| C | 4.1820666  | 0.2758121  | 0.6163691  |
| C | 4.3780484  | 1.7483159  | 0.2085036  |
| O | 4.5199910  | 2.0744351  | -1.0103086 |
| C | 3.5235023  | 2.2195350  | 3.7999749  |
| C | 2.0401613  | 2.3927625  | 3.5944210  |
| C | 1.5173923  | 3.3260711  | 2.6893032  |
| C | 0.1435016  | 3.4284053  | 2.5006595  |
| C | -0.7146318 | 2.5921904  | 3.2236394  |
| C | -0.2066590 | 1.6612187  | 4.1374727  |
| C | 1.1678992  | 1.5732397  | 4.3197022  |
| S | 4.2076346  | 3.8715975  | 4.2647343  |
| C | 5.9240595  | 3.4939243  | 4.6612362  |
| C | 3.5131157  | 4.0886588  | 5.9140167  |
| C | -2.1370416 | 2.6966630  | 3.0315590  |
| N | -3.2818352 | 2.7804831  | 2.8776953  |
| H | 4.6620978  | 3.5746384  | 1.3723142  |
| H | 5.3269512  | 1.4370137  | 3.0325858  |
| H | 2.6379261  | 0.3991043  | 2.1134490  |
| H | 4.0389578  | -0.5221029 | 2.6826409  |
| H | 3.4628772  | -0.2283636 | -0.0378219 |
| H | 5.1437272  | -0.2457570 | 0.5094217  |
| H | 3.6975297  | 1.5913355  | 4.6816972  |
| H | 2.1791976  | 3.9761957  | 2.1268583  |
| H | -0.2633728 | 4.1497964  | 1.7999181  |
| H | -0.8814430 | 1.0224019  | 4.6974762  |
| H | 1.5714492  | 0.8543500  | 5.0270884  |
| H | 6.4654774  | 3.3612860  | 3.7239468  |
| H | 6.3193405  | 4.3591443  | 5.1975245  |
| H | 5.9704629  | 2.5966256  | 5.2816624  |
| H | 2.4361733  | 4.2270476  | 5.8047773  |
| H | 3.9602704  | 4.9889594  | 6.3393373  |
| H | 3.7381991  | 3.2114306  | 6.5237114  |

la\_sy\_tr\_5.log

E = -1109.628148  
H = -1109.322722  
G = -1109.388018

NImag=0

|   |            |            |            |
|---|------------|------------|------------|
| C | 3.5954943  | 1.3111382  | 1.0367959  |
| C | 4.0741530  | 2.4580674  | 1.8928965  |
| C | 5.6134350  | 2.2803799  | 1.8886993  |
| C | 5.9174972  | 1.5226809  | 0.5922039  |
| C | 4.6142386  | 0.7724772  | 0.2638834  |
| O | 4.5925967  | -0.1392286 | -0.6196141 |
| C | 3.4808926  | 2.3845750  | 3.3069424  |
| C | 1.9791068  | 2.4491292  | 3.3965497  |
| C | 1.2312092  | 3.2923839  | 2.5641204  |
| C | -0.1545670 | 3.3286911  | 2.6599053  |
| C | -0.8002948 | 2.5091735  | 3.5933364  |
| C | -0.0689061 | 1.6536940  | 4.4244037  |
| C | 1.3165548  | 1.6307761  | 4.3191797  |
| S | 4.2951236  | 3.6985165  | 4.3614663  |
| C | 3.4669571  | 3.5504814  | 5.9537946  |
| C | 3.6242928  | 5.2625655  | 3.7727862  |
| C | -2.2354917 | 2.5421178  | 3.6944637  |
| N | -3.3902156 | 2.5696634  | 3.7772960  |
| H | 2.5443857  | 1.0622690  | 0.9163707  |
| H | 3.8187089  | 3.4447888  | 1.4697330  |
| H | 5.9000665  | 1.6603296  | 2.7482838  |
| H | 6.1479965  | 3.2326587  | 1.9745824  |
| H | 6.7638588  | 0.8335793  | 0.6823193  |
| H | 6.1433067  | 2.2091195  | -0.2355209 |
| H | 3.8401805  | 1.4708651  | 3.7964071  |
| H | 1.7253483  | 3.9210912  | 1.8296345  |
| H | -0.7348372 | 3.9804586  | 2.0154360  |
| H | -0.5808003 | 1.0167744  | 5.1379784  |
| H | 1.8916950  | 0.9655916  | 4.9573304  |
| H | 3.6669067  | 2.5498274  | 6.3416780  |
| H | 3.9141565  | 4.2994035  | 6.6105775  |
| H | 2.3961168  | 3.7268787  | 5.8396833  |
| H | 3.9676860  | 5.4186654  | 2.7489299  |
| H | 4.0386540  | 6.0369533  | 4.4218517  |
| H | 2.5349943  | 5.2542637  | 3.8352155  |

la\_sy\_tr\_5\_ts1.log

E = -1109.598272  
H = -1109.295366  
G = -1109.361096

NImag=1

|   |            |            |            |
|---|------------|------------|------------|
| C | -1.1415892 | -1.9130105 | 0.8447741  |
| C | -1.6904734 | -0.6359526 | 0.9530891  |
| C | -3.1410234 | -0.6801517 | 0.4946661  |
| C | -3.1868977 | -1.9230736 | -0.4021576 |
| C | -1.9720248 | -2.7491076 | 0.0308899  |
| O | -1.7983456 | -3.9311404 | -0.3006940 |
| C | -0.8139915 | 0.6312581  | -0.5476645 |
| C | 0.6046920  | 0.4064829  | -0.3753545 |
| C | 1.4240643  | 1.0932101  | 0.5496306  |
| C | 2.7474398  | 0.7329993  | 0.7440571  |
| C | 3.2957408  | -0.3445096 | 0.0299975  |
| C | 2.4968856  | -1.0580091 | -0.8762888 |
| C | 1.1780975  | -0.6836168 | -1.0720477 |

|   |            |            |            |
|---|------------|------------|------------|
| S | -1.5372233 | 2.2255253  | -0.4776410 |
| C | -0.3402627 | 3.4933077  | -0.9761218 |
| C | -1.7977323 | 2.6891616  | 1.2524777  |
| C | 4.6639217  | -0.7174954 | 0.2318124  |
| N | 5.7723024  | -1.0189339 | 0.3955091  |
| H | -0.1881200 | -2.2298552 | 1.2530488  |
| H | -1.3835332 | 0.0538954  | 1.7353401  |
| H | -3.4793091 | 0.2314368  | -0.0069744 |
| H | -3.7752691 | -0.8194804 | 1.3788355  |
| H | -3.0582321 | -1.6541945 | -1.4587291 |
| H | -4.1083292 | -2.5051294 | -0.3167328 |
| H | -1.2504051 | 0.1390018  | -1.4149555 |
| H | 1.0287939  | 1.9113265  | 1.1416839  |
| H | 3.3608098  | 1.2763546  | 1.4561072  |
| H | 2.9165395  | -1.8952321 | -1.4253988 |
| H | 0.5687455  | -1.2314830 | -1.7854214 |
| H | -0.0092828 | 3.2393328  | -1.9844532 |
| H | -0.8746312 | 4.4456720  | -0.9859096 |
| H | 0.5033834  | 3.5350359  | -0.2876343 |
| H | -2.5952847 | 2.0603652  | 1.6506601  |
| H | -2.1295241 | 3.7296994  | 1.2395305  |
| H | -0.8879188 | 2.5865126  | 1.8427665  |

la\_sy\_tr\_5\_ts2.log

E = -1109.619245

H = -1109.315585

G = -1109.380612

NImag=1

|   |            |            |            |
|---|------------|------------|------------|
| C | -1.9449361 | -1.5720455 | 0.5435110  |
| C | -1.8657444 | -0.0871637 | 0.8056539  |
| C | -3.2841250 | 0.4198232  | 0.4849013  |
| C | -3.8501119 | -0.5970499 | -0.5163419 |
| C | -3.0587792 | -1.8894574 | -0.2514648 |
| O | -3.4209667 | -2.9983630 | -0.7165280 |
| C | -0.8843780 | 0.2039194  | -0.2793141 |
| C | 0.5269701  | -0.2405466 | -0.1776203 |
| C | 1.1564603  | -0.4144101 | 1.0640414  |
| C | 2.4962230  | -0.7746283 | 1.1285540  |
| C | 3.2162343  | -0.9647120 | -0.0577808 |
| C | 2.6014123  | -0.7975314 | -1.3051816 |
| C | 1.2628279  | -0.4352509 | -1.3554209 |
| S | -0.6535777 | 2.4445759  | -0.3532353 |
| C | 1.0571218  | 2.7758016  | -0.8273606 |
| C | -0.5463269 | 2.7861114  | 1.4151436  |
| C | 4.6039523  | -1.3378280 | 0.0054956  |
| N | 5.7217187  | -1.6371345 | 0.0557041  |
| H | -1.1821938 | -2.2781745 | 0.8511963  |
| H | -1.5153780 | 0.2138878  | 1.7958813  |
| H | -3.2952729 | 1.4507412  | 0.1129058  |
| H | -3.8667970 | 0.3954918  | 1.4110210  |
| H | -3.6873077 | -0.2895802 | -1.5580022 |
| H | -4.9234636 | -0.7689598 | -0.3941006 |
| H | -1.2979864 | 0.1419742  | -1.2847999 |
| H | 0.6011943  | -0.2788926 | 1.9867621  |
| H | 2.9847874  | -0.9109840 | 2.0875261  |
| H | 3.1686729  | -0.9520787 | -2.2169691 |
| H | 0.7765637  | -0.2996573 | -2.3177652 |
| H | 1.1762767  | 2.5073746  | -1.8783879 |
| H | 1.2466575  | 3.8441233  | -0.6991456 |
| H | 1.7420712  | 2.1935188  | -0.2057767 |
| H | -1.5389498 | 2.6501047  | 1.8480082  |

|   |            |           |           |
|---|------------|-----------|-----------|
| H | -0.2307611 | 3.8231979 | 1.5477940 |
| H | 0.1725356  | 2.1113957 | 1.8879959 |

1a\_sy\_tr\_6.log

E = -1109.628036  
H = -1109.322477  
G = -1109.387752

NImag=0

|   |            |            |            |
|---|------------|------------|------------|
| C | 3.5217944  | 1.7624959  | 0.7525315  |
| C | 4.1203536  | 2.7643195  | 1.7086368  |
| C | 5.6356080  | 2.4427420  | 1.6346999  |
| C | 5.7133441  | 0.9730262  | 1.2060383  |
| C | 4.3839699  | 0.7108842  | 0.4763513  |
| O | 4.2134459  | -0.3405316 | -0.2148865 |
| C | 3.5594488  | 2.5317878  | 3.1321116  |
| C | 2.0593667  | 2.5286125  | 3.2607109  |
| C | 1.2680654  | 3.4237194  | 2.5283066  |
| C | -0.1148013 | 3.4081966  | 2.6540732  |
| C | -0.7148377 | 2.4852477  | 3.5203199  |
| C | 0.0602870  | 1.5815187  | 4.2546208  |
| C | 1.4436438  | 1.6111018  | 4.1193106  |
| S | 4.3243940  | 3.7838258  | 4.3023741  |
| C | 3.6676399  | 3.3322056  | 5.9176719  |
| C | 3.4453725  | 5.3252924  | 3.9928277  |
| C | -2.1477553 | 2.4610591  | 3.6509552  |
| N | -3.3008001 | 2.4417874  | 3.7572441  |
| H | 2.4871840  | 1.8034187  | 0.4240386  |
| H | 3.9321207  | 3.8108937  | 1.4304210  |
| H | 6.1692707  | 2.6493618  | 2.5689782  |
| H | 6.0800919  | 3.0778452  | 0.8618473  |
| H | 5.7885686  | 0.2928215  | 2.0657512  |
| H | 6.5679216  | 0.7631745  | 0.5541698  |
| H | 3.9675459  | 1.5946948  | 3.5316344  |
| H | 1.7306475  | 4.1318596  | 1.8471055  |
| H | -0.7291387 | 4.0983309  | 2.0854011  |
| H | -0.4163229 | 0.8656878  | 4.9159513  |
| H | 2.0533547  | 0.9073500  | 4.6797123  |
| H | 4.0221671  | 2.3267740  | 6.1517411  |
| H | 4.0765237  | 4.0459884  | 6.6357267  |
| H | 2.5772717  | 3.3774736  | 5.9074082  |
| H | 3.6217684  | 5.6154280  | 2.9556825  |
| H | 3.8841060  | 6.0687267  | 4.6616430  |
| H | 2.3810793  | 5.2030800  | 4.1991896  |

1a\_sy\_tr\_7.log

E = -1109.626480  
H = -1109.320959  
G = -1109.386745

NImag=0

|   |            |            |            |
|---|------------|------------|------------|
| C | 3.4988199  | 1.2682825  | 1.1462591  |
| C | 3.9400757  | 2.5649451  | 1.7801930  |
| C | 5.4809758  | 2.5059380  | 1.6410704  |
| C | 5.7276246  | 1.6201833  | 0.4156946  |
| C | 4.4802213  | 0.7243639  | 0.3292713  |
| O | 4.4549777  | -0.2898176 | -0.4329876 |
| C | 3.4504041  | 2.6558818  | 3.2337331  |
| C | 1.9478373  | 2.5707563  | 3.3632734  |
| C | 1.1132926  | 3.4402564  | 2.6493281  |
| C | -0.2668329 | 3.3523665  | 2.7769881  |
| C | -0.8170436 | 2.3802694  | 3.6221831  |

|   |            |           |            |
|---|------------|-----------|------------|
| C | 0.0050040  | 1.5018229 | 4.3359500  |
| C | 1.3854058  | 1.6074882 | 4.2052024  |
| S | 3.9544255  | 4.2855270 | 4.0038231  |
| C | 5.6529069  | 4.0086899 | 4.5556795  |
| C | 3.1206159  | 4.2206268 | 5.6045520  |
| C | -2.2465109 | 2.2847904 | 3.7584126  |
| N | -3.3967544 | 2.2090398 | 3.8690951  |
| H | 2.4689311  | 0.9215606 | 1.1663851  |
| H | 3.5573057  | 3.4579543 | 1.2539422  |
| H | 5.8985707  | 2.0161709 | 2.5297695  |
| H | 5.9357730  | 3.4986204 | 1.5553892  |
| H | 6.6453700  | 1.0270231 | 0.4881149  |
| H | 5.7946208  | 2.2140947 | -0.5064733 |
| H | 3.9307930  | 1.8902811 | 3.8547749  |
| H | 1.5345572  | 4.1914188 | 1.9866094  |
| H | -0.9164345 | 4.0257099 | 2.2277082  |
| H | -0.4332744 | 0.7510275 | 4.9849564  |
| H | 2.0322183  | 0.9329918 | 4.7587302  |
| H | 6.3225059  | 4.1112762 | 3.7039095  |
| H | 5.8658652  | 4.7920460 | 5.2861744  |
| H | 5.7317923  | 3.0206449 | 5.0129213  |
| H | 2.0537862  | 4.3774006 | 5.4439567  |
| H | 3.5296927  | 5.0365818 | 6.2034077  |
| H | 3.3141815  | 3.2552869 | 6.0774025  |

la\_sy\_tr\_7\_ts1.log

E = -1109.600123

H = -1109.297596

G = -1109.364118

NImag=1

|   |            |            |            |
|---|------------|------------|------------|
| C | 0.3595394  | -1.9528871 | -1.0677460 |
| C | 1.4999932  | -1.1536868 | -0.9448707 |
| C | 2.5187744  | -1.8876707 | -0.0806881 |
| C | 1.6546211  | -2.8641337 | 0.7249615  |
| C | 0.3677676  | -3.0003461 | -0.0942998 |
| O | -0.4716062 | -3.8938618 | 0.1015517  |
| C | 1.0852763  | 0.5571861  | 0.3020559  |
| C | -0.3525216 | 0.6908455  | 0.2372779  |
| C | -1.0416635 | 1.4997827  | -0.6960451 |
| C | -2.4219331 | 1.4629817  | -0.7975603 |
| C | -3.1665557 | 0.6056570  | 0.0296519  |
| C | -2.5048510 | -0.2174443 | 0.9530153  |
| C | -1.1236129 | -0.1753661 | 1.0466764  |
| S | 1.9965099  | 1.9286329  | -0.3134706 |
| C | 3.7043645  | 1.3606880  | -0.2530553 |
| C | 2.0390387  | 3.1659738  | 1.0100146  |
| C | -4.5943010 | 0.5702085  | -0.0731573 |
| N | -5.7513415 | 0.5422359  | -0.1568891 |
| H | -0.4649681 | -1.7788792 | -1.7514414 |
| H | 1.8415320  | -0.5289640 | -1.7676934 |
| H | 3.1271960  | -1.2299953 | 0.5432670  |
| H | 3.2006180  | -2.4347439 | -0.7437803 |
| H | 1.3921406  | -2.4438094 | 1.7053086  |
| H | 2.1184426  | -3.8395691 | 0.8950852  |
| H | 1.4876910  | 0.2148206  | 1.2564593  |
| H | -0.4968392 | 2.1676398  | -1.3575072 |
| H | -2.9320353 | 2.0960018  | -1.5170157 |
| H | -3.0768264 | -0.8860869 | 1.5891237  |
| H | -0.6182327 | -0.8158486 | 1.7644155  |
| H | 3.8402307  | 0.5939197  | -1.0165581 |
| H | 4.3332755  | 2.2233509  | -0.4809047 |

|   |           |           |           |
|---|-----------|-----------|-----------|
| H | 3.9255518 | 0.9740612 | 0.7437382 |
| H | 1.0190556 | 3.5315882 | 1.1411657 |
| H | 2.6927526 | 3.9824446 | 0.6947067 |
| H | 2.4053989 | 2.6965532 | 1.9251532 |

la\_sy\_tr\_7\_ts2.log  
E = -1109.618109  
H = -1109.314514  
G = -1109.379913  
NImag=1

|   |            |            |            |
|---|------------|------------|------------|
| C | 1.7863197  | -1.7652787 | -0.4561499 |
| C | 1.7627954  | -0.3786249 | -1.0510209 |
| C | 3.2169206  | 0.1039408  | -0.9078333 |
| C | 3.7704576  | -0.6695338 | 0.2958164  |
| C | 2.9161327  | -1.9474068 | 0.3609906  |
| O | 3.2449018  | -2.9335865 | 1.0644481  |
| C | 0.8512151  | 0.1992072  | -0.0252707 |
| C | -0.5836680 | -0.1824346 | 0.0204697  |
| C | -1.2888057 | -0.5136878 | -1.1457840 |
| C | -2.6429906 | -0.8124170 | -1.0862886 |
| C | -3.3020232 | -0.7789393 | 0.1501661  |
| C | -2.6122640 | -0.4476314 | 1.3226047  |
| C | -1.2580538 | -0.1494298 | 1.2483084  |
| S | 0.7189702  | 2.3946222  | -0.4602420 |
| C | 1.6120788  | 2.9914281  | 0.9921801  |
| C | -0.9567280 | 2.9096088  | -0.0248330 |
| C | -4.7051374 | -1.0894652 | 0.2149437  |
| N | -5.8350463 | -1.3387057 | 0.2670824  |
| H | 0.9815853  | -2.4831674 | -0.5670760 |
| H | 1.3761593  | -0.2796561 | -2.0691337 |
| H | 3.3000466  | 1.1922710  | -0.8093532 |
| H | 3.7562961  | -0.1853173 | -1.8152197 |
| H | 3.6477604  | -0.1147638 | 1.2365928  |
| H | 4.8320398  | -0.9153027 | 0.2009484  |
| H | 1.3037324  | 0.3378019  | 0.9577987  |
| H | -0.7825302 | -0.5378076 | -2.1057035 |
| H | -3.1916261 | -1.0701164 | -1.9861569 |
| H | -3.1336386 | -0.4264484 | 2.2737039  |
| H | -0.7115519 | 0.1106430  | 2.1511160  |
| H | 2.6549371  | 2.6821325  | 0.8972017  |
| H | 1.5566344  | 4.0812953  | 1.0230911  |
| H | 1.1738488  | 2.5630681  | 1.8970489  |
| H | -1.6454279 | 2.4643750  | -0.7458005 |
| H | -1.0109561 | 3.9985900  | -0.0912776 |
| H | -1.2029734 | 2.5795731  | 0.9866172  |

la\_sy\_tr\_8.log  
E = -1109.622710  
H = -1109.316948  
G = -1109.380750  
NImag=0

|   |           |           |            |
|---|-----------|-----------|------------|
| C | 4.6411446 | 2.4500279 | 1.5940829  |
| C | 4.4669669 | 1.4796860 | 2.7246084  |
| C | 3.7895241 | 0.2571415 | 2.0365093  |
| C | 3.1290462 | 0.8119209 | 0.7690750  |
| C | 3.8698468 | 2.1317880 | 0.4861619  |
| O | 3.7016680 | 2.7509804 | -0.6099854 |
| C | 3.5796080 | 1.9063596 | 3.9331781  |
| C | 2.1276044 | 2.2051223 | 3.6421827  |
| C | 1.7253167 | 3.1905306 | 2.7278123  |

|   |            |            |            |
|---|------------|------------|------------|
| C | 0.3780062  | 3.3760173  | 2.4406160  |
| C | -0.5797962 | 2.5735729  | 3.0708818  |
| C | -0.1967381 | 1.5907896  | 3.9903366  |
| C | 1.1531328  | 1.4173105  | 4.2692858  |
| S | 4.2778371  | 3.2693339  | 4.9873842  |
| C | 4.0862075  | 4.8391615  | 4.1199339  |
| C | 6.0622170  | 3.0352224  | 4.8730826  |
| C | -1.9745878 | 2.7634437  | 2.7715414  |
| N | -3.0971464 | 2.9160212  | 2.5310804  |
| H | 5.2426214  | 3.3528291  | 1.6638915  |
| H | 5.4100706  | 1.1528699  | 3.1805538  |
| H | 3.0938338  | -0.2677919 | 2.7013235  |
| H | 4.5778262  | -0.4520386 | 1.7649731  |
| H | 2.0596631  | 1.0223103  | 0.9100353  |
| H | 3.2142940  | 0.1322438  | -0.0858672 |
| H | 3.6112688  | 1.0904324  | 4.6658291  |
| H | 2.4621081  | 3.7982411  | 2.2173286  |
| H | 0.0679181  | 4.1337072  | 1.7286376  |
| H | -0.9462778 | 0.9745514  | 4.4754107  |
| H | 1.4569189  | 0.6516173  | 4.9774492  |
| H | 3.0399740  | 5.1380714  | 4.1833985  |
| H | 4.7009172  | 5.5508373  | 4.6765501  |
| H | 4.4255671  | 4.7561706  | 3.0882422  |
| H | 6.2945417  | 2.0346005  | 5.2411213  |
| H | 6.5111689  | 3.7836123  | 5.5287528  |
| H | 6.3960282  | 3.1694056  | 3.8433020  |

la\_sy\_tr\_8\_ts1.log

E = -1109.604033

H = -1109.301433

G = -1109.366335

NImag=1

|   |            |            |            |
|---|------------|------------|------------|
| C | -0.8912074 | 2.2070739  | -0.8252749 |
| C | -1.3311076 | 1.8369706  | 0.4428137  |
| C | -0.2506851 | 2.1391600  | 1.4670681  |
| C | 1.0152199  | 2.3693099  | 0.6294125  |
| C | 0.5077896  | 2.5233999  | -0.8085789 |
| O | 1.2260631  | 2.9026925  | -1.7455632 |
| C | -1.4734562 | -0.3513763 | 0.6057484  |
| C | -0.1056650 | -0.7647181 | 0.4368642  |
| C | 0.5559878  | -0.7363168 | -0.8168003 |
| C | 1.9199574  | -0.9623933 | -0.9112962 |
| C | 2.6720600  | -1.2285320 | 0.2419666  |
| C | 2.0315472  | -1.2945247 | 1.4951070  |
| C | 0.6721828  | -1.0725749 | 1.5834607  |
| S | -2.5468143 | -0.7526828 | -0.7220121 |
| C | -4.0566046 | 0.1671546  | -0.3702610 |
| C | -3.1322232 | -2.4331429 | -0.3857089 |
| C | 4.0818385  | -1.4557762 | 0.1437867  |
| N | 5.2253777  | -1.6392311 | 0.0666163  |
| H | -1.4962377 | 2.2323444  | -1.7266454 |
| H | -2.3677842 | 1.8993209  | 0.7576280  |
| H | -0.1432336 | 1.3515219  | 2.2179840  |
| H | -0.5388666 | 3.0535730  | 1.9993952  |
| H | 1.7063312  | 1.5184404  | 0.6706816  |
| H | 1.5740416  | 3.2624772  | 0.9249414  |
| H | -1.9387628 | -0.5400710 | 1.5739157  |
| H | 0.0008952  | -0.5250186 | -1.7250897 |
| H | 2.4123882  | -0.9231568 | -1.8783234 |
| H | 2.6096000  | -1.5224331 | 2.3853856  |
| H | 0.1829906  | -1.1234585 | 2.5523994  |

|   |            |            |            |
|---|------------|------------|------------|
| H | -3.9179313 | 1.1991893  | -0.6921933 |
| H | -4.8531118 | -0.2945704 | -0.9565253 |
| H | -4.2800032 | 0.1083344  | 0.6971564  |
| H | -2.2670675 | -3.0947679 | -0.4564210 |
| H | -3.8706470 | -2.6976336 | -1.1458115 |
| H | -3.5670538 | -2.4667228 | 0.6151777  |

la\_sy\_tr\_8\_ts2.log

E = -1109.611967  
H = -1109.308086  
G = -1109.373435

NImag=1

|   |            |            |            |
|---|------------|------------|------------|
| C | 2.3312247  | 1.4011231  | -1.0508765 |
| C | 2.4147113  | 0.1393627  | -0.2321727 |
| C | 1.9715607  | 2.5117058  | -0.2682478 |
| O | 1.7491100  | 3.6947179  | -0.6224340 |
| C | 1.1494010  | -0.4326202 | -0.7864858 |
| C | -0.2407814 | -0.0307033 | -0.4451178 |
| C | -0.7034926 | 0.1413029  | 0.8691110  |
| C | -2.0397108 | 0.4311174  | 1.1179993  |
| C | -2.9344238 | 0.5436354  | 0.0484859  |
| C | -2.4967472 | 0.3620071  | -1.2698529 |
| C | -1.1609829 | 0.0706511  | -1.5028710 |
| C | 1.8840181  | 2.0716296  | 1.1986529  |
| C | 2.4616799  | 0.6477067  | 1.2246388  |
| S | 1.1687607  | -2.6574066 | -0.3286428 |
| C | 1.2075088  | -2.7685242 | 1.4716432  |
| C | -0.5338716 | -3.1680758 | -0.6421306 |
| C | -4.3178983 | 0.8398249  | 0.3076965  |
| N | -5.4321708 | 1.0774497  | 0.5160962  |
| H | 2.4889018  | 1.4283061  | -2.1236360 |
| H | 3.2528419  | -0.5287868 | -0.4624869 |
| H | 1.2547260  | -0.6525425 | -1.8479956 |
| H | -0.0321586 | 0.0385110  | 1.7119999  |
| H | -2.3905808 | 0.5623589  | 2.1361779  |
| H | -3.1973522 | 0.4462662  | -2.0939596 |
| H | -0.8164989 | -0.0777251 | -2.5226182 |
| H | 2.4474562  | 2.7649800  | 1.8310051  |
| H | 0.8371947  | 2.1225599  | 1.5234817  |
| H | 1.9747167  | -0.0232013 | 1.9372613  |
| H | 3.5186753  | 0.6917776  | 1.5045951  |
| H | 1.0688353  | -3.8143011 | 1.7558771  |
| H | 2.1880764  | -2.4279330 | 1.8085666  |
| H | 0.4173120  | -2.1564562 | 1.9118312  |
| H | -0.6355459 | -4.2249159 | -0.3858883 |
| H | -0.7354257 | -3.0299101 | -1.7064738 |
| H | -1.2251180 | -2.5666239 | -0.0458572 |

la\_sy\_tr\_9.log

E = -1109.625757  
H = -1109.320223  
G = -1109.385434

NImag=0

|   |           |           |            |
|---|-----------|-----------|------------|
| C | 4.8259797 | 2.2496661 | 1.5213599  |
| C | 4.5526894 | 1.3341054 | 2.6783675  |
| C | 3.8306759 | 0.1267578 | 2.0167644  |
| C | 3.2760182 | 0.6537086 | 0.6867522  |
| C | 4.0908370 | 1.9267364 | 0.3915357  |
| O | 3.9965271 | 2.5131371 | -0.7313664 |
| C | 3.6723110 | 1.8941173 | 3.8367195  |



|   |            |            |            |
|---|------------|------------|------------|
| C | 2.2308629  | 2.2241206  | 3.5509221  |
| C | 1.8337470  | 3.0683659  | 2.5020344  |
| C | 0.4856880  | 3.3029839  | 2.2590116  |
| C | -0.4798166 | 2.6937770  | 3.0689583  |
| C | -0.1027870 | 1.8533323  | 4.1218897  |
| C | 1.2485311  | 1.6282606  | 4.3545307  |
| S | 4.5952075  | 3.2935896  | 4.6339773  |
| C | 3.7350060  | 3.4595353  | 6.2094887  |
| C | 4.0883820  | 4.8286334  | 3.8370255  |
| C | -1.8756488 | 2.9367343  | 2.8164464  |
| N | -2.9989653 | 3.1322866  | 2.6135409  |
| H | 5.4707110  | 3.1233532  | 1.5909280  |
| H | 5.4635332  | 0.9873028  | 3.1881962  |
| H | 3.0654377  | -0.3096721 | 2.6691686  |
| H | 4.5773722  | -0.6506420 | 1.8272224  |
| H | 2.2113216  | 0.9170606  | 0.7488913  |
| H | 3.3812592  | -0.0670449 | -0.1316478 |
| H | 3.7010646  | 1.1641890  | 4.6559734  |
| H | 2.5773714  | 3.5295311  | 1.8623718  |
| H | 0.1802907  | 3.9520246  | 1.4448772  |
| H | -0.8575069 | 1.3853152  | 4.7449308  |
| H | 1.5469808  | 0.9728055  | 5.1682008  |
| H | 3.9195342  | 2.5524898  | 6.7870567  |
| H | 4.1638051  | 4.3228963  | 6.7219623  |
| H | 2.6672399  | 3.6066116  | 6.0339300  |
| H | 4.3921123  | 4.7909411  | 2.7907200  |
| H | 4.6311718  | 5.6223338  | 4.3554850  |
| H | 3.0120558  | 4.9691560  | 3.9415750  |

1a\_sy\_tr\_9\_ts1.log

E = -1109.600799

H = -1109.297691

G = -1109.361047

NImag=1

|   |            |            |            |
|---|------------|------------|------------|
| C | 1.2116656  | -2.0295943 | -0.6772944 |
| C | 1.6057777  | -1.6590411 | 0.6096098  |
| C | 0.5806317  | -2.1768718 | 1.6125432  |
| C | -0.6452629 | -2.5309317 | 0.7577251  |
| C | -0.1217678 | -2.5504610 | -0.6802091 |
| O | -0.7774504 | -2.9935439 | -1.6359754 |
| C | 1.3958917  | 0.4609445  | 0.9747268  |
| C | 0.0281725  | 0.7324752  | 0.5921217  |
| C | -0.4056279 | 0.6994488  | -0.7510290 |
| C | -1.7516304 | 0.8121441  | -1.0718432 |
| C | -2.7030676 | 0.9520566  | -0.0534556 |
| C | -2.2943544 | 0.9995652  | 1.2925567  |
| C | -0.9516528 | 0.8935235  | 1.6012995  |
| S | 2.7400626  | 1.2864736  | 0.2057403  |
| C | 2.1596523  | 2.8743410  | -0.4414205 |
| C | 3.2033008  | 0.4855540  | -1.3506466 |
| C | -4.0932340 | 1.0637970  | -0.3842518 |
| N | -5.2187682 | 1.1550329  | -0.6500022 |
| H | 1.8055598  | -1.9406359 | -1.5797410 |
| H | 2.6485578  | -1.6079373 | 0.9110057  |
| H | 0.3621504  | -1.4610206 | 2.4099567  |
| H | 0.9930588  | -3.0744890 | 2.0883170  |
| H | -1.4396607 | -1.7785372 | 0.8312953  |
| H | -1.0851532 | -3.5006317 | 1.0094818  |
| H | 1.5945801  | 0.5105050  | 2.0439679  |
| H | 0.3107760  | 0.5690145  | -1.5542618 |
| H | -2.0715711 | 0.7777028  | -2.1086288 |

|   |            |            |            |
|---|------------|------------|------------|
| H | -3.0334323 | 1.1227072  | 2.0780662  |
| H | -0.6359202 | 0.9306429  | 2.6403729  |
| H | 1.8011741  | 3.4590059  | 0.4070180  |
| H | 3.0178206  | 3.3674599  | -0.9028150 |
| H | 1.3651534  | 2.7216819  | -1.1732208 |
| H | 3.5893545  | -0.5069210 | -1.1192255 |
| H | 4.0057588  | 1.1011394  | -1.7638892 |
| H | 2.3672749  | 0.4352592  | -2.0473758 |

la\_sy\_tr\_prod\_1.log  
E = -631.741910  
H = -631.520098  
G = -631.572454

NImag=0

|   |            |            |            |
|---|------------|------------|------------|
| C | 0.0623270  | 3.5059294  | 0.3623326  |
| C | 0.7667342  | 2.2199024  | 0.6217071  |
| C | -0.2715857 | 1.2402404  | 1.1068657  |
| C | -1.6362385 | 1.9263271  | 1.0971122  |
| C | -1.3384105 | 3.4286366  | 0.9566510  |
| O | 0.5171619  | 4.4484187  | -0.2564090 |
| C | 0.7240980  | 1.7736756  | 2.0875530  |
| C | 1.8279051  | 0.9175943  | 2.5934942  |
| C | 2.4221924  | -0.0799026 | 1.8052725  |
| C | 3.4440611  | -0.8708208 | 2.3121015  |
| C | 3.8870374  | -0.6698057 | 3.6262315  |
| C | 3.3071141  | 0.3218648  | 4.4261549  |
| C | 2.2858129  | 1.1056927  | 3.9047918  |
| H | 0.3674611  | 2.5056709  | 2.8085762  |
| H | 1.6325296  | 1.9510103  | 0.0263542  |
| H | -0.1998590 | 0.1926550  | 0.8315956  |
| C | 4.9445938  | -1.4862533 | 4.1555053  |
| N | 5.7972310  | -2.1445362 | 4.5825391  |
| H | -2.2013596 | 1.5740150  | 0.2293299  |
| H | -2.2140250 | 1.6924818  | 1.9955009  |
| H | -1.3199600 | 3.9403154  | 1.9264992  |
| H | -2.0460661 | 3.9607575  | 0.3180313  |
| H | 2.0906937  | -0.2458724 | 0.7841887  |
| H | 3.9000933  | -1.6407517 | 1.6982767  |
| H | 3.6558984  | 0.4736655  | 5.4424649  |
| H | 1.8337595  | 1.8761894  | 4.5224791  |

lb.log  
E = -308.557006  
H = -308.422842  
G = -308.461468

NImag=0

|   |            |            |            |
|---|------------|------------|------------|
| C | 0.9410857  | -0.1810061 | -0.9842478 |
| C | 0.3069281  | 1.1024825  | -0.5168417 |
| C | 0.9799174  | 1.3813106  | 0.8345731  |
| C | 1.9519666  | 0.2294843  | 1.0350312  |
| C | 1.8551464  | -0.6778843 | -0.1346915 |
| O | 2.6876428  | 0.0744531  | 1.9961803  |
| C | 2.6856480  | -1.9134113 | -0.2449537 |
| H | 0.6673646  | -0.6454213 | -1.9286709 |
| H | -0.7783352 | 0.9848443  | -0.4281113 |
| H | 0.4791643  | 1.9032809  | -1.2438658 |
| H | 1.5343998  | 2.3243404  | 0.8500373  |
| H | 0.2723866  | 1.4019390  | 1.6688251  |
| H | 2.4738838  | -2.4487804 | -1.1734938 |
| H | 3.7520327  | -1.6653176 | -0.2193115 |

H 2.4923674 -2.5850142 0.5982408

1b\_sy\_c\_1.log

E = -1148.923877

H = -1148.588789

G = -1148.656831

NImag=0

|   |            |            |            |
|---|------------|------------|------------|
| C | -0.1096670 | 3.5505088  | -0.1169639 |
| C | 0.2246127  | 4.9415297  | 0.3553389  |
| C | -1.2151742 | 3.5516332  | -0.9498290 |
| O | -1.7424528 | 2.5903036  | -1.5995589 |
| C | 1.3118448  | 5.6995189  | -0.4684578 |
| C | 1.8656876  | 6.9174090  | 0.2241412  |
| C | 2.4757634  | 6.8133644  | 1.4817428  |
| C | 2.9704112  | 7.9431607  | 2.1200122  |
| C | 2.8446666  | 9.1920391  | 1.4982055  |
| C | 2.2339327  | 9.3119905  | 0.2449865  |
| C | 1.7529900  | 8.1704187  | -0.3865294 |
| C | -1.7774133 | 4.9813223  | -1.0262899 |
| C | -1.1058693 | 5.7077831  | 0.1465923  |
| S | 2.7067641  | 4.5441142  | -0.8809613 |
| C | 2.1437648  | 3.8429887  | -2.4494717 |
| C | 3.9835328  | 5.6589387  | -1.5025325 |
| C | 3.3514636  | 10.3666683 | 2.1569405  |
| N | 3.7594615  | 11.3123964 | 2.6864083  |
| C | 0.6573473  | 2.3139709  | 0.2569112  |
| H | 0.5488578  | 4.9701137  | 1.4052691  |
| H | 0.9136538  | 5.9764680  | -1.4521224 |
| H | 2.5739367  | 5.8460674  | 1.9684050  |
| H | 3.4485313  | 7.8652463  | 3.0906962  |
| H | 2.1428756  | 10.2852063 | -0.2258363 |
| H | 1.2821807  | 8.2524679  | -1.3620371 |
| H | -1.5151217 | 5.4320913  | -1.9947902 |
| H | -2.8709045 | 4.9776964  | -0.9601921 |
| H | -1.7134127 | 5.5948154  | 1.0503268  |
| H | -0.9589924 | 6.7812468  | -0.0233009 |
| H | 2.9221099  | 3.1603837  | -2.7956462 |
| H | 1.2105350  | 3.3118681  | -2.2583662 |
| H | 1.9933726  | 4.6577953  | -3.1607189 |
| H | 4.7266348  | 5.0336041  | -2.0020481 |
| H | 4.4390262  | 6.1700014  | -0.6538042 |
| H | 3.5417108  | 6.3704360  | -2.2034513 |
| H | -0.0233210 | 1.4549936  | 0.3114287  |
| H | 1.4533552  | 2.0147871  | -0.4488091 |
| H | 1.1405054  | 2.4182520  | 1.2376121  |

1b\_sy\_c\_1\_ts1.log

E = -1148.898970

H = -1148.567032

G = -1148.636707

NImag=1

|   |            |            |            |
|---|------------|------------|------------|
| C | 2.4457628  | -0.8872201 | 0.9640706  |
| C | 1.1452102  | -1.1355726 | 0.5105333  |
| C | 3.3887603  | -1.4035998 | 0.0213027  |
| O | 4.6291905  | -1.3244736 | 0.0670062  |
| C | 0.2393053  | 0.4573275  | -0.6175052 |
| C | -1.1690124 | 0.2562049  | -0.3748395 |
| C | -1.8113084 | 0.6454882  | 0.8270233  |
| C | -3.1383936 | 0.3328253  | 1.0679031  |
| C | -3.8743819 | -0.3924372 | 0.1175785  |

|   |            |            |            |
|---|------------|------------|------------|
| C | -3.2569426 | -0.7979458 | -1.0787697 |
| C | -1.9332120 | -0.4766675 | -1.3164347 |
| C | 2.6180780  | -2.0585577 | -1.1245715 |
| C | 1.1889163  | -2.1857812 | -0.5850360 |
| S | 0.9563047  | 1.8978194  | 0.1055024  |
| C | 2.5484397  | 1.9602711  | -0.7369639 |
| C | 0.1528576  | 3.3201915  | -0.6792974 |
| C | -5.2462748 | -0.7156631 | 0.3645708  |
| N | -6.3589638 | -0.9786482 | 0.5645097  |
| C | 2.8494711  | -0.1078681 | 2.1800294  |
| H | 0.2965644  | -1.0993429 | 1.1935120  |
| H | 0.5687602  | 0.3463584  | -1.6511658 |
| H | -1.2646423 | 1.1991263  | 1.5869887  |
| H | -3.6120235 | 0.6445775  | 1.9937889  |
| H | -3.8253401 | -1.3546939 | -1.8174965 |
| H | -1.4684478 | -0.7815062 | -2.2499980 |
| H | 2.6516081  | -1.3766454 | -1.9863111 |
| H | 3.0751210  | -3.0038681 | -1.4295686 |
| H | 1.0396691  | -3.1707107 | -0.1256633 |
| H | 0.4131668  | -2.0574573 | -1.3444698 |
| H | 3.0460765  | 2.8789025  | -0.4218323 |
| H | 3.1319373  | 1.0918901  | -0.4328465 |
| H | 2.3759227  | 1.9599969  | -1.8153655 |
| H | 0.6802693  | 4.2225752  | -0.3610820 |
| H | -0.8801283 | 3.3493444  | -0.3277865 |
| H | 0.1924519  | 3.1993350  | -1.7635007 |
| H | 3.5808814  | -0.6626104 | 2.7801741  |
| H | 3.3240584  | 0.8529805  | 1.9305575  |
| H | 1.9851856  | 0.1063712  | 2.8173282  |

1b\_sy\_c\_2.log

E = -1148.924549

H = -1148.589610

G = -1148.657559

NImag=0

|   |            |            |            |
|---|------------|------------|------------|
| C | -0.1181276 | 3.5158573  | -0.4805544 |
| C | 0.3706521  | 4.7407468  | 0.2513557  |
| C | -1.4088672 | 3.6884722  | -0.9570986 |
| O | -2.1480121 | 2.8924806  | -1.6228272 |
| C | 1.2788265  | 5.6944191  | -0.5798443 |
| C | 1.8632288  | 6.8706538  | 0.1589999  |
| C | 2.4333811  | 6.7334936  | 1.4317856  |
| C | 2.9534364  | 7.8391180  | 2.0950331  |
| C | 2.8996949  | 9.0963196  | 1.4829744  |
| C | 2.3267993  | 9.2524208  | 0.2153545  |
| C | 1.8141457  | 8.1378947  | -0.4362856 |
| C | -1.9061833 | 5.0860688  | -0.5499821 |
| C | -0.9377567 | 5.5165783  | 0.5575613  |
| S | 2.5713731  | 4.6967491  | -1.4521808 |
| C | 3.6773418  | 5.9340645  | -2.1529606 |
| C | 3.6075369  | 4.0223171  | -0.1420782 |
| C | 3.4345900  | 10.2430614 | 2.1681932  |
| N | 3.8657272  | 11.1657841 | 2.7194035  |
| C | 0.6287485  | 2.2145035  | -0.5493103 |
| H | 0.9111204  | 4.4938249  | 1.1763033  |
| H | 0.6972908  | 6.0563038  | -1.4374898 |
| H | 2.4700063  | 5.7655452  | 1.9212061  |
| H | 3.3942960  | 7.7329937  | 3.0806035  |
| H | 2.2852884  | 10.2328744 | -0.2472725 |
| H | 1.3654699  | 8.2507803  | -1.4194702 |
| H | -1.8756949 | 5.7644089  | -1.4145653 |

|   |            |           |            |
|---|------------|-----------|------------|
| H | -2.9474598 | 5.0420907 | -0.2128809 |
| H | -1.3142095 | 5.1806678 | 1.5292421  |
| H | -0.7886709 | 6.6010086 | 0.6178088  |
| H | 4.4671318  | 5.3872704 | -2.6722981 |
| H | 3.1050503  | 6.5254633 | -2.8703268 |
| H | 4.0961452  | 6.5627633 | -1.3654041 |
| H | 4.3525763  | 3.3929889 | -0.6332292 |
| H | 2.9792588  | 3.4122855 | 0.5092237  |
| H | 4.0919851  | 4.8282881 | 0.4115654  |
| H | 1.0628919  | 1.9353566 | 0.4227394  |
| H | -0.0722022 | 1.4223398 | -0.8382209 |
| H | 1.4556908  | 2.1739426 | -1.2778731 |

1b\_sy\_c\_2\_r.log

E = -1148.920525  
H = -1148.585339  
G = -1148.653822

NImag=0

|   |            |            |            |
|---|------------|------------|------------|
| C | -1.2848058 | -0.0563248 | -2.0638075 |
| C | -1.6458716 | -0.5696615 | -0.6993975 |
| C | -2.3348666 | 0.5917665  | -2.6877919 |
| O | -2.3755564 | 1.1868506  | -3.8162166 |
| C | -0.7703530 | 0.1267319  | 0.3783707  |
| C | -0.6794943 | 1.6301485  | 0.3833433  |
| C | -1.8118073 | 2.4564494  | 0.3651831  |
| C | -1.6788812 | 3.8382630  | 0.3519739  |
| C | -0.3985653 | 4.4072429  | 0.3604486  |
| C | 0.7423077  | 3.6000141  | 0.3823283  |
| C | 0.5914333  | 2.2172883  | 0.3934256  |
| C | -3.5791679 | 0.5273445  | -1.7907410 |
| C | -3.1869814 | -0.3870346 | -0.6181246 |
| S | -1.1655490 | -0.5787870 | 2.0638384  |
| C | 0.3783440  | -0.3126988 | 2.9572136  |
| C | -2.2212031 | 0.6097592  | 2.9157888  |
| C | -0.2565120 | 5.8392870  | 0.3511242  |
| N | -0.1417657 | 6.9916625  | 0.3459650  |
| C | 0.1076602  | -0.1606464 | -2.6041940 |
| H | -1.3991852 | -1.6373319 | -0.5717157 |
| H | 0.2455013  | -0.2680967 | 0.2521580  |
| H | -2.8083847 | 2.0296751  | 0.3706893  |
| H | -2.5568672 | 4.4753454  | 0.3362437  |
| H | 1.7296654  | 4.0495045  | 0.3886021  |
| H | 1.4743446  | 1.5836916  | 0.4020754  |
| H | -3.8525153 | 1.5431245  | -1.4747337 |
| H | -4.4343084 | 0.1357072  | -2.3538757 |
| H | -3.6481764 | -1.3710770 | -0.7425736 |
| H | -3.5310402 | -0.0111006 | 0.3516581  |
| H | 0.2094373  | -0.6154299 | 3.9924020  |
| H | 1.1386930  | -0.9481448 | 2.5008603  |
| H | 0.6576513  | 0.7416593  | 2.9035235  |
| H | -2.3724185 | 0.2048575  | 3.9188844  |
| H | -3.1785619 | 0.6705330  | 2.3979096  |
| H | -1.7287570 | 1.5820344  | 2.9629533  |
| H | 0.5029493  | -1.1869320 | -2.5596779 |
| H | 0.1210160  | 0.1578296  | -3.6523436 |
| H | 0.8356029  | 0.4716390  | -2.0667682 |

1b\_sy\_c\_2\_ts1.log

E = -1148.895924  
H = -1148.563325

G = -1148.631604  
 NImag=1

|   |            |            |            |
|---|------------|------------|------------|
| C | -2.8723733 | -0.5318961 | -0.7283389 |
| C | -1.5019576 | -0.7896359 | -0.8460252 |
| C | -3.4725795 | -1.5056967 | 0.1331540  |
| O | -4.6614114 | -1.5763183 | 0.4892739  |
| C | -0.3257522 | 0.2974262  | 0.5941871  |
| C | 1.0908125  | 0.0979089  | 0.3604136  |
| C | 1.8151805  | 0.7513678  | -0.6641537 |
| C | 3.1473711  | 0.4556477  | -0.9069136 |
| C | 3.8022993  | -0.5192574 | -0.1403323 |
| C | 3.1020186  | -1.1947513 | 0.8739734  |
| C | 1.7758696  | -0.8858293 | 1.1158388  |
| C | -2.3957541 | -2.4944782 | 0.5775261  |
| C | -1.2095256 | -2.1924515 | -0.3438638 |
| S | -1.0418245 | 1.8976142  | 0.6165798  |
| C | 0.0842508  | 3.0134033  | 1.4921603  |
| C | -0.9593926 | 2.6366497  | -1.0384067 |
| C | 5.1773724  | -0.8276996 | -0.3935959 |
| N | 6.2917911  | -1.0778031 | -0.5985040 |
| C | -3.6509741 | 0.6061655  | -1.3166888 |
| H | -0.9014839 | -0.3851615 | -1.6605117 |
| H | -0.7212492 | -0.2131308 | 1.4718877  |
| H | 1.3323722  | 1.4904794  | -1.2930020 |
| H | 3.6841847  | 0.9710042  | -1.6973378 |
| H | 3.6070536  | -1.9480455 | 1.4706532  |
| H | 1.2451728  | -1.4023721 | 1.9112381  |
| H | -2.1474871 | -2.2876295 | 1.6270284  |
| H | -2.7580900 | -3.5247179 | 0.5203888  |
| H | -1.2115185 | -2.8693729 | -1.2069728 |
| H | -0.2351876 | -2.2893879 | 0.1409937  |
| H | -0.3259311 | 4.0231395  | 1.4164988  |
| H | 0.1122557  | 2.6942283  | 2.5350118  |
| H | 1.0776361  | 2.9652282  | 1.0419257  |
| H | -1.7657339 | 3.3708987  | -1.0917427 |
| H | -1.1170492 | 1.8574577  | -1.7833928 |
| H | 0.0036766  | 3.1269226  | -1.1846302 |
| H | -3.2228941 | 0.9484972  | -2.2646858 |
| H | -4.6822149 | 0.2893053  | -1.5067767 |
| H | -3.7136682 | 1.4789301  | -0.6491470 |

lb\_sy\_c\_2\_ts2.log  
 E = -1148.909187  
 H = -1148.575707  
 G = -1148.644906  
 NImag=1

|   |            |            |            |
|---|------------|------------|------------|
| C | -2.3228010 | -1.2188327 | 0.6054854  |
| C | -2.2662542 | 0.1118711  | -0.1050192 |
| C | -1.9634708 | -2.2660688 | -0.2564761 |
| O | -1.8424154 | -3.4890058 | 0.0175698  |
| C | -1.0167100 | 0.5602086  | 0.5835288  |
| C | 0.3610509  | 0.0742632  | 0.3159382  |
| C | 0.9222632  | -0.0218617 | -0.9682411 |
| C | 2.2447175  | -0.4129315 | -1.1363943 |
| C | 3.0285807  | -0.7056539 | -0.0144157 |
| C | 2.4942715  | -0.5992197 | 1.2759383  |
| C | 1.1736464  | -0.2034345 | 1.4292609  |
| C | -1.7404505 | -1.7152098 | -1.6668044 |
| C | -2.2269760 | -0.2580129 | -1.6017089 |
| S | -0.8665198 | 2.7968763  | 0.3485041  |
| C | 0.8390958  | 3.1567539  | 0.8169618  |

|   |            |            |            |
|---|------------|------------|------------|
| C | -0.7697668 | 3.0562354  | -1.4339033 |
| C | 4.3973815  | -1.1103016 | -0.1889555 |
| N | 5.5000038  | -1.4363012 | -0.3293071 |
| C | -2.6886396 | -1.4072475 | 2.0468257  |
| H | -3.0843977 | 0.8047324  | 0.1335180  |
| H | -1.1902250 | 0.6811402  | 1.6533197  |
| H | 0.3379171  | 0.2185909  | -1.8472917 |
| H | 2.6716651  | -0.4854890 | -2.1311691 |
| H | 3.1094047  | -0.8217807 | 2.1414740  |
| H | 0.7577255  | -0.1094981 | 2.4286589  |
| H | -0.6784086 | -1.8056700 | -1.9290662 |
| H | -2.2986314 | -2.3113674 | -2.3961925 |
| H | -3.2572113 | -0.2025089 | -1.9665477 |
| H | -1.6394535 | 0.4364103  | -2.2082942 |
| H | 1.0316312  | 4.2189220  | 0.6496624  |
| H | 0.9499324  | 2.9284124  | 1.8790075  |
| H | 1.5299803  | 2.5499145  | 0.2260315  |
| H | -0.5393125 | 4.1082040  | -1.6174110 |
| H | -1.7452601 | 2.8182043  | -1.8614119 |
| H | 0.0054160  | 2.4240551  | -1.8721303 |
| H | -3.2231889 | -0.5342740 | 2.4397247  |
| H | -3.3441808 | -2.2788250 | 2.1646419  |
| H | -1.8227245 | -1.5805507 | 2.7040948  |

1b\_sy\_c\_3.log

E = -1148.921817

H = -1148.586512

G = -1148.654561

NImag=0

|   |            |            |            |
|---|------------|------------|------------|
| C | -0.0377793 | 4.0317006  | 0.1574978  |
| C | -0.1426716 | 5.4343737  | -0.3913466 |
| C | -0.8377039 | 3.1268754  | -0.5256362 |
| O | -1.0207241 | 1.8855993  | -0.3102842 |
| C | 1.1930443  | 6.0926063  | -0.8812633 |
| C | 1.8413242  | 7.1043647  | 0.0333209  |
| C | 2.0465453  | 6.8493471  | 1.3945523  |
| C | 2.6483110  | 7.8008127  | 2.2089334  |
| C | 3.0440754  | 9.0254551  | 1.6580442  |
| C | 2.8402951  | 9.2993010  | 0.3014078  |
| C | 2.2426493  | 8.3346441  | -0.5010740 |
| C | -1.5756981 | 3.8373566  | -1.6639187 |
| C | -1.1679960 | 5.3145555  | -1.5656859 |
| S | 2.4110090  | 4.7400440  | -1.2267488 |
| C | 1.7940788  | 4.0607167  | -2.7802131 |
| C | 3.8171093  | 5.6817841  | -1.8626289 |
| C | 3.6621898  | 10.0165651 | 2.4986265  |
| N | 4.1601897  | 10.8143819 | 3.1743380  |
| C | 0.6298043  | 3.6816761  | 1.4536085  |
| H | -0.5205011 | 6.1452545  | 0.3615853  |
| H | 1.0513224  | 6.5674128  | -1.8582554 |
| H | 1.7338598  | 5.9063555  | 1.8288934  |
| H | 2.8078907  | 7.6021508  | 3.2634726  |
| H | 3.1476192  | 10.2528524 | -0.1149341 |
| H | 2.0842151  | 8.5408644  | -1.5557647 |
| H | -1.3182065 | 3.3837931  | -2.6304994 |
| H | -2.6541420 | 3.6912780  | -1.5306901 |
| H | -2.0318556 | 5.9530348  | -1.3610969 |
| H | -0.7316594 | 5.6728106  | -2.5036652 |
| H | 2.5773632  | 3.4096427  | -3.1736026 |
| H | 0.9025143  | 3.4764206  | -2.5552991 |
| H | 1.5821171  | 4.8757321  | -3.4755253 |

|   |           |           |            |
|---|-----------|-----------|------------|
| H | 4.5051267 | 4.9574218 | -2.3038320 |
| H | 4.3003645 | 6.1820572 | -1.0223595 |
| H | 3.4833817 | 6.4025060 | -2.6120032 |
| H | 0.4103319 | 2.6326639 | 1.6822558  |
| H | 1.7264218 | 3.7872579 | 1.4521582  |
| H | 0.2608838 | 4.2894310 | 2.2956324  |

lb\_sy\_c\_3\_r.log

E = -1148.923673

H = -1148.588625

G = -1148.657351

NImag=0

|   |            |            |            |
|---|------------|------------|------------|
| C | -0.6444809 | -1.9559132 | 0.4666766  |
| C | -1.2501709 | -0.6840997 | 0.9972015  |
| C | -1.3700789 | -2.4827698 | -0.5865902 |
| O | -1.1326381 | -3.5021422 | -1.3175949 |
| C | -0.3451320 | 0.5295179  | 0.6386158  |
| C | -0.0210361 | 0.7088818  | -0.8269189 |
| C | -0.9642722 | 1.1735691  | -1.7516496 |
| C | -0.6340743 | 1.2992680  | -3.0958986 |
| C | 0.6544303  | 0.9585887  | -3.5214202 |
| C | 1.6125368  | 0.5042433  | -2.6079383 |
| C | 1.2693468  | 0.3914233  | -1.2663937 |
| C | -2.6188459 | -1.6183323 | -0.8225285 |
| C | -2.6720657 | -0.6657465 | 0.3809995  |
| S | -1.0804728 | 2.1175568  | 1.2447256  |
| C | -1.2172451 | 1.8328944  | 3.0191118  |
| C | 0.3468872  | 3.2185791  | 1.1858356  |
| C | 1.0009730  | 1.0881031  | -4.9118616 |
| N | 1.2805797  | 1.1932071  | -6.0307978 |
| C | 0.6600389  | -2.4903918 | 0.9721004  |
| H | -1.3056200 | -0.6816273 | 2.0959583  |
| H | 0.5901710  | 0.4404492  | 1.2042086  |
| H | -1.9683171 | 1.4414955  | -1.4362321 |
| H | -1.3664989 | 1.6579128  | -3.8113825 |
| H | 2.6114997  | 0.2507310  | -2.9467078 |
| H | 2.0112161  | 0.0492648  | -0.5506029 |
| H | -2.5189092 | -1.0868636 | -1.7786854 |
| H | -3.5134147 | -2.2469523 | -0.8998826 |
| H | -3.3646292 | -1.0578008 | 1.1324247  |
| H | -3.0282360 | 0.3393948  | 0.1256448  |
| H | -1.3658444 | 2.8101127  | 3.4829411  |
| H | -2.0905350 | 1.2045964  | 3.1962888  |
| H | -0.3035010 | 1.3622691  | 3.3877020  |
| H | 0.0515052  | 4.1598622  | 1.6531606  |
| H | 0.5934143  | 3.3865776  | 0.1361010  |
| H | 1.1816195  | 2.7590529  | 1.7188581  |
| H | 0.8474129  | -3.4757955 | 0.5311097  |
| H | 1.5269807  | -1.8568578 | 0.7212895  |
| H | 0.6730564  | -2.6057023 | 2.0666144  |

lb\_sy\_c\_3\_ts2.log

E = -1148.911075

H = -1148.577826

G = -1148.647641

NImag=1

|   |           |           |            |
|---|-----------|-----------|------------|
| C | 1.8770632 | 1.6697625 | 0.4935085  |
| C | 2.0921592 | 0.5468124 | -0.4948306 |
| C | 1.0652049 | 2.6697916 | -0.0632617 |
| O | 0.6217682 | 3.7069399 | 0.4956130  |



|   |            |            |            |
|---|------------|------------|------------|
| C | 1.1144112  | -0.3507200 | 0.1858223  |
| C | -0.3708218 | -0.1950743 | 0.1156166  |
| C | -1.0870628 | -0.3104663 | -1.0843504 |
| C | -2.4742011 | -0.2241142 | -1.0910582 |
| C | -3.1585986 | -0.0280971 | 0.1136180  |
| C | -2.4609204 | 0.0709708  | 1.3246261  |
| C | -1.0763472 | -0.0257785 | 1.3161723  |
| C | 0.7755859  | 2.3378232  | -1.5315259 |
| C | 1.6975609  | 1.1496334  | -1.8538104 |
| S | 1.3554781  | -2.4221708 | -0.5695763 |
| C | 3.0181461  | -2.7184021 | 0.0691550  |
| C | 0.3779805  | -3.2606310 | 0.6963004  |
| C | -4.5942319 | 0.0594051  | 0.1084179  |
| N | -5.7504719 | 0.1291016  | 0.1047008  |
| C | 2.4216875  | 1.7067264  | 1.8893270  |
| H | 3.0944023  | 0.1024882  | -0.4969498 |
| H | 1.4424468  | -0.6248858 | 1.1917037  |
| H | -0.5681965 | -0.4840596 | -2.0214119 |
| H | -3.0258585 | -0.3143122 | -2.0209515 |
| H | -3.0006553 | 0.2154214  | 2.2546113  |
| H | -0.5270492 | 0.0419615  | 2.2513414  |
| H | -0.2896072 | 2.1012443  | -1.6503918 |
| H | 0.9810748  | 3.2094802  | -2.1613997 |
| H | 2.6166369  | 1.5173486  | -2.3203767 |
| H | 1.2605916  | 0.4176152  | -2.5394312 |
| H | 3.1781902  | -3.7952539 | 0.1528518  |
| H | 3.7317435  | -2.2997240 | -0.6419153 |
| H | 3.1353698  | -2.2425624 | 1.0468729  |
| H | 0.6299899  | -4.3228872 | 0.6944393  |
| H | -0.6767345 | -3.1351014 | 0.4437595  |
| H | 0.5859042  | -2.8234858 | 1.6770755  |
| H | 3.0456744  | 2.5955359  | 2.0547450  |
| H | 1.6329713  | 1.7352705  | 2.6550959  |
| H | 3.0468444  | 0.8301858  | 2.0947693  |

lb\_sy\_c\_4.log

E = -1148.922023

H = -1148.586950

G = -1148.655541

NImag=0

|   |            |            |            |
|---|------------|------------|------------|
| C | -0.0528697 | 3.9675345  | 0.1857919  |
| C | -0.1920543 | 5.4289565  | -0.1598039 |
| C | -0.7840467 | 3.1558454  | -0.6690407 |
| O | -0.8678437 | 1.8858402  | -0.7105106 |
| C | 1.0863359  | 6.1009278  | -0.7797523 |
| C | 1.7736696  | 7.1132774  | 0.1034459  |
| C | 2.0497497  | 8.3901873  | -0.3952832 |
| C | 2.6766748  | 9.3423386  | 0.4009393  |
| C | 3.0393554  | 9.0048244  | 1.7090991  |
| C | 2.7704134  | 7.7297983  | 2.2232274  |
| C | 2.1342118  | 6.7932572  | 1.4190298  |
| C | -1.5406319 | 4.0291393  | -1.6804583 |
| C | -1.3938292 | 5.4585468  | -1.1447243 |
| S | 2.3312072  | 4.7903072  | -1.2033967 |
| C | 1.6958853  | 4.0590748  | -2.7271009 |
| C | 3.6513391  | 5.8060314  | -1.9110931 |
| C | 3.6939331  | 9.9813040  | 2.5390841  |
| N | 4.2215417  | 10.7671475 | 3.2063462  |
| C | 0.6794937  | 3.4646399  | 1.3936544  |
| H | -0.4202528 | 6.0462578  | 0.7217019  |
| H | 0.8633277  | 6.5677672  | -1.7454745 |

|   |            |            |            |
|---|------------|------------|------------|
| H | 1.7712130  | 8.6416413  | -1.4146242 |
| H | 2.8877585  | 10.3342262 | 0.0153975  |
| H | 3.0547215  | 7.4830068  | 3.2406802  |
| H | 1.9162453  | 5.8083525  | 1.8228362  |
| H | -1.1127561 | 3.9031486  | -2.6845146 |
| H | -2.5863253 | 3.7081210  | -1.7432871 |
| H | -2.2890956 | 5.7313096  | -0.5771580 |
| H | -1.2708629 | 6.2103091  | -1.9315097 |
| H | 2.5603660  | 3.6682244  | -3.2679986 |
| H | 1.0237110  | 3.2468805  | -2.4543622 |
| H | 1.1898098  | 4.8262331  | -3.3174050 |
| H | 4.3650181  | 5.1181806  | -2.3686106 |
| H | 4.1364534  | 6.3526503  | -1.1016547 |
| H | 3.2407156  | 6.4895539  | -2.6577161 |
| H | 0.3369967  | 3.9502758  | 2.3208342  |
| H | 0.4976508  | 2.3885184  | 1.4953176  |
| H | 1.7724703  | 3.6015645  | 1.3617936  |

1b\_sy\_c\_5.log

E = -1148.924316

H = -1148.589569

G = -1148.658191

NImag=0

|   |            |            |            |
|---|------------|------------|------------|
| C | -0.4850573 | 4.8535952  | -1.0172849 |
| C | 0.7760951  | 4.1597537  | -0.5839507 |
| C | -1.2050362 | 5.3426606  | 0.0590641  |
| O | -2.2763110 | 6.0347637  | 0.0841048  |
| C | 2.0203264  | 5.0476316  | -0.9127062 |
| C | 2.0990342  | 6.3187876  | -0.1043424 |
| C | 2.7332451  | 6.4001686  | 1.1408281  |
| C | 2.6941091  | 7.5766364  | 1.8801726  |
| C | 2.0018642  | 8.6818152  | 1.3734405  |
| C | 1.3672277  | 8.6185392  | 0.1271611  |
| C | 1.4288245  | 7.4408808  | -0.6070797 |
| C | -0.4904676 | 4.9441532  | 1.3603150  |
| C | 0.5637715  | 3.9143504  | 0.9283854  |
| S | 3.5853337  | 4.0845133  | -0.7080983 |
| C | 3.4256347  | 2.8372584  | -2.0021554 |
| C | 4.7926326  | 5.1876815  | -1.4704763 |
| C | 1.9513326  | 9.9003147  | 2.1365620  |
| N | 1.9114870  | 10.8817934 | 2.7502224  |
| C | -0.8010383 | 5.1131840  | -2.4572330 |
| H | 0.9328859  | 3.2134001  | -1.1220322 |
| H | 2.0044860  | 5.2925178  | -1.9816662 |
| H | 3.2602592  | 5.5467570  | 1.5592379  |
| H | 3.1878979  | 7.6372591  | 2.8441085  |
| H | 0.8386340  | 9.4835899  | -0.2593831 |
| H | 0.9468115  | 7.3865064  | -1.5786284 |
| H | -0.0392626 | 5.8411052  | 1.8090175  |
| H | -1.2013372 | 4.5422507  | 2.0911501  |
| H | 0.1671580  | 2.9020641  | 1.0550877  |
| H | 1.4906404  | 3.9692049  | 1.5117549  |
| H | 4.4299717  | 2.4506729  | -2.1864402 |
| H | 2.7861614  | 2.0353515  | -1.6345807 |
| H | 3.0137431  | 3.2970097  | -2.9032093 |
| H | 5.7279749  | 4.6319554  | -1.5587443 |
| H | 4.9302344  | 6.0445842  | -0.8094994 |
| H | 4.4267163  | 5.4990900  | -2.4511281 |
| H | -1.7971377 | 5.5623780  | -2.5378520 |
| H | -0.0962100 | 5.8078134  | -2.9460753 |
| H | -0.7970353 | 4.1972083  | -3.0671466 |

1b\_sy\_c\_5\_ts1.log

E = -1148.903091

H = -1148.570933

G = -1148.639735

NImag=1

|   |            |            |            |
|---|------------|------------|------------|
| C | -0.4535551 | 2.3935070  | -0.2859195 |
| C | -1.2829413 | 1.5794448  | 0.4921484  |
| C | 0.8386085  | 2.5079302  | 0.3161762  |
| O | 1.8151790  | 3.1686170  | -0.0813504 |
| C | -1.3985310 | -0.3183394 | -0.4377620 |
| C | -0.0392796 | -0.8069423 | -0.3907173 |
| C | 0.4581365  | -1.7121757 | 0.5797130  |
| C | 1.8088263  | -1.9889071 | 0.6762374  |
| C | 2.7189392  | -1.3647008 | -0.1968686 |
| C | 2.2482799  | -0.4874877 | -1.1841614 |
| C | 0.8925224  | -0.2194281 | -1.2803486 |
| C | 0.8443693  | 1.7066166  | 1.6201133  |
| C | -0.6229334 | 1.3009959  | 1.8337300  |
| S | -2.5996513 | -1.3441923 | 0.3366507  |
| C | -4.0679317 | -0.3017766 | 0.4138819  |
| C | -3.1352373 | -2.5297081 | -0.9260388 |
| C | 4.1198193  | -1.6431485 | -0.0917555 |
| N | 5.2548558  | -1.8689779 | -0.0056120 |
| C | -0.8197413 | 3.0069582  | -1.6006443 |
| H | -2.3629830 | 1.6902376  | 0.4392894  |
| H | -1.7552550 | 0.0261566  | -1.4095776 |
| H | -0.2172609 | -2.1986491 | 1.2777429  |
| H | 2.1720593  | -2.6819179 | 1.4287051  |
| H | 2.9488804  | -0.0179644 | -1.8680572 |
| H | 0.5346261  | 0.4525360  | -2.0538583 |
| H | 1.5041057  | 0.8384638  | 1.4968320  |
| H | 1.2492898  | 2.3136871  | 2.4359075  |
| H | -1.0951896 | 1.9303072  | 2.5969927  |
| H | -0.7366809 | 0.2609159  | 2.1594933  |
| H | -4.9166110 | -0.9633042 | 0.5968242  |
| H | -3.9574904 | 0.3905267  | 1.2488299  |
| H | -4.1897520 | 0.2303726  | -0.5320775 |
| H | -3.9497586 | -3.1271108 | -0.5107404 |
| H | -2.2782233 | -3.1668053 | -1.1517362 |
| H | -3.4587810 | -1.9825133 | -1.8138468 |
| H | -0.1679538 | 3.8591828  | -1.8194563 |
| H | -0.7147835 | 2.2995747  | -2.4375944 |
| H | -1.8579508 | 3.3585272  | -1.6103764 |

1b\_sy\_c\_6.log

E = -1148.922539

H = -1148.587482

G = -1148.655652

NImag=0

|   |            |           |            |
|---|------------|-----------|------------|
| C | -0.2493888 | 3.7174249 | -0.9019009 |
| C | 0.3992397  | 4.7998595 | -0.0727252 |
| C | -1.6209947 | 3.6780977 | -0.6941971 |
| O | -2.4775240 | 2.8288638 | -1.1049292 |
| C | 1.4449246  | 5.6987397 | -0.7712153 |
| C | 1.9400053  | 6.8643801 | 0.0465673  |
| C | 2.2880992  | 6.7216607 | 1.3968516  |
| C | 2.7268709  | 7.8170026 | 2.1310980  |
| C | 2.8140781  | 9.0695199 | 1.5119998  |
| C | 2.4616550  | 9.2306823 | 0.1672923  |

|   |            |            |            |
|---|------------|------------|------------|
| C | 2.0275765  | 8.1257886  | -0.5547814 |
| C | -2.0301801 | 4.8166702  | 0.2465386  |
| C | -0.7926961 | 5.7111370  | 0.3340525  |
| S | 2.8560204  | 4.6743249  | -1.4193464 |
| C | 4.0566760  | 5.9018596  | -1.9651472 |
| C | 3.6876313  | 4.0191067  | 0.0382270  |
| C | 3.2641213  | 10.2067682 | 2.2701165  |
| N | 3.6267577  | 11.1221938 | 2.8797055  |
| C | 0.4826864  | 2.5448991  | -1.4964113 |
| H | 0.8796067  | 4.3894796  | 0.8342532  |
| H | 1.0126734  | 6.0666851  | -1.7103458 |
| H | 2.2080419  | 5.7566811  | 1.8879161  |
| H | 2.9952865  | 7.7077619  | 3.1765922  |
| H | 2.5268719  | 10.2073963 | -0.3003747 |
| H | 1.7493908  | 8.2429276  | -1.5985250 |
| H | -2.9187740 | 5.3460143  | -0.1149598 |
| H | -2.2890950 | 4.3807287  | 1.2216747  |
| H | -0.6424837 | 6.1665942  | 1.3174098  |
| H | -0.8756421 | 6.5279390  | -0.3942539 |
| H | 4.9103291  | 5.3470778  | -2.3600028 |
| H | 3.5964019  | 6.4886951  | -2.7624760 |
| H | 4.3591421  | 6.5349386  | -1.1294712 |
| H | 4.5166326  | 3.4117013  | -0.3316202 |
| H | 2.9830092  | 3.3877112  | 0.5812099  |
| H | 4.0590816  | 4.8345108  | 0.6607182  |
| H | -0.2331380 | 1.7243533  | -1.6287685 |
| H | 0.9450789  | 2.7236263  | -2.4772186 |
| H | 1.2859272  | 2.1751984  | -0.8372525 |

1b\_sy\_c\_7.log

E = -1148.921669

H = -1148.586444

G = -1148.654366

NImag=0

|   |            |            |            |
|---|------------|------------|------------|
| C | -0.1604845 | 4.0842685  | 0.1977398  |
| C | -0.4139770 | 5.4974656  | -0.2790347 |
| C | -0.6539894 | 3.1389235  | -0.6928547 |
| O | -0.6083640 | 1.8682218  | -0.6271922 |
| C | 0.8033130  | 6.2957588  | -0.8478893 |
| C | 1.6216054  | 7.1434835  | 0.0906765  |
| C | 1.8941963  | 6.7510965  | 1.4063833  |
| C | 2.6319614  | 7.5699684  | 2.2528700  |
| C | 3.1024289  | 8.8004509  | 1.7805381  |
| C | 2.8326402  | 9.2146613  | 0.4715024  |
| C | 2.0926460  | 8.3843205  | -0.3612924 |
| C | -1.3343350 | 3.8485514  | -1.8701362 |
| C | -1.4807974 | 5.2986561  | -1.3946271 |
| S | 1.8346816  | 5.0908828  | -1.8228208 |
| C | 2.9213504  | 6.1970782  | -2.7488875 |
| C | 3.0338448  | 4.3620989  | -0.6959818 |
| C | 3.8640500  | 9.6539898  | 2.6537871  |
| N | 4.4776003  | 10.3408891 | 3.3557909  |
| C | 0.3663122  | 3.6959467  | 1.5479926  |
| H | -0.8101882 | 6.1525018  | 0.5124114  |
| H | 0.4545942  | 6.9527088  | -1.6532792 |
| H | 1.5263215  | 5.8034360  | 1.7795523  |
| H | 2.8404855  | 7.2623972  | 3.2721966  |
| H | 3.1925575  | 10.1749770 | 0.1177302  |
| H | 1.8696850  | 8.7078592  | -1.3744671 |
| H | -0.7193392 | 3.7576714  | -2.7761325 |
| H | -2.2976299 | 3.3752326  | -2.0893251 |

|   |            |           |            |
|---|------------|-----------|------------|
| H | -2.4684671 | 5.4331836 | -0.9419808 |
| H | -1.3906538 | 6.0362882 | -2.1999757 |
| H | 3.5576992  | 5.5648035 | -3.3712865 |
| H | 2.2977974  | 6.8298373 | -3.3830987 |
| H | 3.5297012  | 6.7962218 | -2.0690760 |
| H | 3.7972196  | 3.9023266 | -1.3282308 |
| H | 2.5208444  | 3.5999605 | -0.1119992 |
| H | 3.4802132  | 5.1311303 | -0.0625277 |
| H | 0.1018997  | 2.6480689 | 1.7327976  |
| H | 1.4588584  | 3.7656619 | 1.6778712  |
| H | -0.0756817 | 4.3008211 | 2.3540559  |

1b\_sy\_c\_7\_ts1.log

E = -1148.895968  
H = -1148.563438  
G = -1148.631432

NImag=1

|   |            |            |            |
|---|------------|------------|------------|
| C | 1.5611500  | -1.6913985 | 0.0092895  |
| C | 1.3676407  | -0.9589186 | -1.1711473 |
| C | 2.9125412  | -1.5686878 | 0.4454231  |
| O | 3.4254804  | -2.0378934 | 1.4789642  |
| C | 0.3979716  | 0.8895813  | -0.9485825 |
| C | -0.9712462 | 0.5834666  | -0.5718436 |
| C | -1.4606033 | 0.5662906  | 0.7529145  |
| C | -2.7493708 | 0.1449239  | 1.0380512  |
| C | -3.5944087 | -0.2851493 | 0.0041177  |
| C | -3.1310282 | -0.2809584 | -1.3213075 |
| C | -1.8455671 | 0.1506305  | -1.5974213 |
| C | 3.6824008  | -0.7178695 | -0.5658204 |
| C | 2.7231291  | -0.5838484 | -1.7549224 |
| S | 1.3976173  | 1.9900842  | -0.0185955 |
| C | 0.4117219  | 3.4419599  | 0.4439983  |
| C | 1.6992014  | 1.2562915  | 1.6217066  |
| C | -4.9256790 | -0.7235595 | 0.2997508  |
| N | -6.0039631 | -1.0789000 | 0.5385576  |
| C | 0.5098190  | -2.4030889 | 0.8071531  |
| H | 0.5546650  | -1.2066546 | -1.8530070 |
| H | 0.5316259  | 1.1669291  | -1.9928504 |
| H | -0.8328754 | 0.8739176  | 1.5818746  |
| H | -3.1058482 | 0.1416207  | 2.0633115  |
| H | -3.7834329 | -0.6094899 | -2.1243559 |
| H | -1.4967680 | 0.1600806  | -2.6265960 |
| H | 3.9081720  | 0.2555853  | -0.1082102 |
| H | 4.6402114  | -1.1816885 | -0.8190470 |
| H | 2.9729957  | -1.3116356 | -2.5358845 |
| H | 2.7352365  | 0.4056356  | -2.2214978 |
| H | 1.0396669  | 4.0680129  | 1.0820502  |
| H | 0.1686437  | 3.9697888  | -0.4794108 |
| H | -0.4934528 | 3.1368896  | 0.9707416  |
| H | 2.7563910  | 1.3943732  | 1.8523151  |
| H | 1.4582476  | 0.1940579  | 1.5815583  |
| H | 1.0812297  | 1.7670817  | 2.3614307  |
| H | 0.8332002  | -3.4151493 | 1.0798229  |
| H | 0.2823454  | -1.8858375 | 1.7507282  |
| H | -0.4271534 | -2.4858706 | 0.2450395  |

1b\_sy\_c\_8.log

E = -1148.920771  
H = -1148.585698  
G = -1148.655049

NImag=0

|   |            |            |            |
|---|------------|------------|------------|
| C | -0.5764671 | 5.1679314  | -0.8436362 |
| C | 0.7239314  | 4.4104764  | -0.7380518 |
| C | -1.5197481 | 4.6594669  | 0.0357304  |
| O | -2.7627270 | 4.9216239  | 0.1432769  |
| C | 1.9734514  | 5.3050663  | -0.9497200 |
| C | 2.1080715  | 6.5337321  | -0.0757861 |
| C | 2.4902473  | 6.4759992  | 1.2716744  |
| C | 2.5826754  | 7.6356180  | 2.0328737  |
| C | 2.2956632  | 8.8708323  | 1.4430247  |
| C | 1.9377690  | 8.9497211  | 0.0928010  |
| C | 1.8575054  | 7.7827943  | -0.6565899 |
| C | -0.8693928 | 3.5640445  | 0.8929594  |
| C | 0.6343735  | 3.7086589  | 0.6346551  |
| S | 3.5104052  | 4.2977487  | -0.7329842 |
| C | 3.3511290  | 3.0342376  | -2.0088098 |
| C | 4.7506577  | 5.3743363  | -1.4776664 |
| C | 2.3888467  | 10.0733895 | 2.2275287  |
| N | 2.4642749  | 11.0415805 | 2.8583938  |
| C | -0.9238604 | 5.9882868  | -2.0492406 |
| H | 0.7924198  | 3.6523339  | -1.5406896 |
| H | 2.0039796  | 5.6166151  | -2.0010208 |
| H | 2.7366423  | 5.5310593  | 1.7454851  |
| H | 2.8780266  | 7.5852410  | 3.0754905  |
| H | 1.7358196  | 9.9133297  | -0.3630214 |
| H | 1.6012416  | 7.8437804  | -1.7096792 |
| H | -1.1360670 | 3.6575704  | 1.9515675  |
| H | -1.2482847 | 2.5911146  | 0.5488850  |
| H | 1.1767926  | 2.7562382  | 0.6539872  |
| H | 1.0625777  | 4.3494530  | 1.4098976  |
| H | 4.3429607  | 2.5942813  | -2.1335141 |
| H | 2.6535270  | 2.2750541  | -1.6543149 |
| H | 3.0067275  | 3.4906983  | -2.9388705 |
| H | 5.6796218  | 4.8041764  | -1.5363027 |
| H | 4.8843005  | 6.2345969  | -0.8197096 |
| H | 4.4155522  | 5.6830781  | -2.4699398 |
| H | -2.0015368 | 6.1882700  | -2.0481510 |
| H | -0.4146533 | 6.9604473  | -2.1101396 |
| H | -0.6855537 | 5.4588174  | -2.9874932 |

1b\_sy\_c\_9.log

E = -1148.922391

H = -1148.587417

G = -1148.654605

NImag=0

|   |            |           |            |
|---|------------|-----------|------------|
| C | -0.4253966 | 4.7333598 | -0.9051177 |
| C | 0.9328230  | 4.2048771 | -0.5388273 |
| C | -1.1192773 | 5.2034491 | 0.1973048  |
| O | -2.2585343 | 5.7719534 | 0.2680995  |
| C | 2.0352537  | 5.2038082 | -1.0219693 |
| C | 2.1032239  | 6.4834494 | -0.2281859 |
| C | 2.9122423  | 6.6430828 | 0.9019713  |
| C | 2.8634329  | 7.8146710 | 1.6485470  |
| C | 1.9868486  | 8.8355657 | 1.2646137  |
| C | 1.1758648  | 8.6946923 | 0.1319524  |
| C | 1.2464887  | 7.5234332 | -0.6113329 |
| C | -0.2741454 | 4.9638134 | 1.4566268  |
| C | 0.8582591  | 4.0339915 | 0.9987406  |
| S | 3.7322437  | 4.4685391 | -1.1993732 |
| C | 3.8610513  | 3.1252115 | 0.0007334  |
| C | 3.5334554  | 3.5278833 | -2.7248371 |

|   |            |            |            |
|---|------------|------------|------------|
| C | 1.9275155  | 10.0483298 | 2.0361775  |
| N | 1.8804232  | 11.0255535 | 2.6561387  |
| C | -0.8654901 | 4.8852898  | -2.3274436 |
| H | 1.1528852  | 3.2477690  | -1.0358281 |
| H | 1.8254578  | 5.4522393  | -2.0695472 |
| H | 3.5883638  | 5.8564064  | 1.2273991  |
| H | 3.4926437  | 7.9368900  | 2.5237017  |
| H | 0.5065836  | 9.4966903  | -0.1615509 |
| H | 0.6284950  | 7.4087051  | -1.4969971 |
| H | 0.1054080  | 5.9298087  | 1.8216181  |
| H | -0.8800237 | 4.5318217  | 2.2612257  |
| H | 0.5968975  | 2.9917482  | 1.2106235  |
| H | 1.8051968  | 4.2358794  | 1.5094026  |
| H | 4.7736828  | 2.5845742  | -0.2595290 |
| H | 3.9638891  | 3.5552711  | 0.9971401  |
| H | 2.9932930  | 2.4677161  | -0.0645644 |
| H | 4.4465369  | 2.9460084  | -2.8627621 |
| H | 3.4211806  | 4.2453585  | -3.5389385 |
| H | 2.6631974  | 2.8736282  | -2.6510095 |
| H | -0.7773494 | 3.9523027  | -2.9040736 |
| H | -1.9155525 | 5.1967597  | -2.3545802 |
| H | -0.2927682 | 5.6456691  | -2.8870491 |

lb\_sy\_c\_9\_ts1.log

E = -1148.900072

H = -1148.568033

G = -1148.636649

NImag=1

|   |            |            |            |
|---|------------|------------|------------|
| C | -0.6933572 | 2.3233104  | -0.1666663 |
| C | -1.4067588 | 1.3430051  | 0.5254866  |
| C | 0.5825435  | 2.5389118  | 0.4453778  |
| O | 1.4683068  | 3.3425065  | 0.1039352  |
| C | -1.3027144 | -0.4491859 | -0.6316175 |
| C | 0.0835931  | -0.8270909 | -0.5686742 |
| C | 0.5927265  | -1.8051572 | 0.3212579  |
| C | 1.9529099  | -1.9969183 | 0.4742288  |
| C | 2.8596139  | -1.2037436 | -0.2537702 |
| C | 2.3791768  | -0.2419389 | -1.1562294 |
| C | 1.0156462  | -0.0626743 | -1.3140639 |
| C | 0.6940822  | 1.6385506  | 1.6766458  |
| C | -0.6981212 | 1.0051747  | 1.8274270  |
| S | -2.4773812 | -1.7167376 | -0.2139021 |
| C | -3.0685163 | -1.4162908 | 1.4742083  |
| C | -3.9178596 | -1.1629075 | -1.1442093 |
| C | 4.2687502  | -1.3902146 | -0.0852161 |
| N | 5.4111787  | -1.5428933 | 0.0520848  |
| C | -1.1312883 | 2.9899566  | -1.4317910 |
| H | -2.4933780 | 1.3069418  | 0.4770966  |
| H | -1.6361023 | 0.0289485  | -1.5510983 |
| H | -0.0849899 | -2.4154845 | 0.9150658  |
| H | 2.3261934  | -2.7496863 | 1.1615972  |
| H | 3.0804167  | 0.3589054  | -1.7275902 |
| H | 0.6494439  | 0.6735722  | -2.0229966 |
| H | 1.4750973  | 0.8881303  | 1.4986141  |
| H | 0.9981803  | 2.2268918  | 2.5482491  |
| H | -1.2528096 | 1.4522568  | 2.6610833  |
| H | -0.6459171 | -0.0705083 | 2.0167415  |
| H | -3.9114647 | -2.0948793 | 1.6235520  |
| H | -2.2664394 | -1.6781736 | 2.1650634  |
| H | -3.3800332 | -0.3793741 | 1.6001532  |
| H | -4.7656057 | -1.7804361 | -0.8437522 |

|   |            |            |            |
|---|------------|------------|------------|
| H | -3.7018784 | -1.3095715 | -2.2031900 |
| H | -4.1039249 | -0.1096255 | -0.9246499 |
| H | -2.2152755 | 3.1491914  | -1.4527151 |
| H | -0.6392280 | 3.9612701  | -1.5471341 |
| H | -0.8767578 | 2.3943011  | -2.3223220 |

lb\_sy\_c\_prod\_1.log

E = -671.038631

H = -670.787707

G = -670.843098

NImag=0

|   |            |            |            |
|---|------------|------------|------------|
| C | 0.9753701  | -0.2892521 | -1.7831079 |
| C | 0.3332128  | 0.3834398  | -2.9549733 |
| C | -0.9038337 | -0.4440584 | -3.2764940 |
| C | -1.0297047 | -1.5829293 | -2.2669126 |
| C | 0.3084901  | -1.6294763 | -1.5101889 |
| O | 1.8591860  | 0.2029735  | -1.1069993 |
| C | 0.2609663  | -0.4663913 | -4.2146577 |
| C | 1.1102007  | -1.6733223 | -4.4601521 |
| C | 2.4987008  | -1.6188670 | -4.2839849 |
| C | 3.2918289  | -2.7316126 | -4.5344363 |
| C | 2.6872145  | -3.9184158 | -4.9685088 |
| C | 1.3016077  | -3.9882963 | -5.1582589 |
| C | 0.5236439  | -2.8644185 | -4.9041572 |
| H | 0.1318258  | 0.1526102  | -5.1020289 |
| C | 0.4291569  | 1.8821231  | -3.0585780 |
| H | -1.8053231 | 0.0644369  | -3.6035881 |
| C | 3.4994494  | -5.0769878 | -5.2253740 |
| N | 4.1539440  | -6.0101692 | -5.4325757 |
| H | -1.8422633 | -1.3465553 | -1.5743452 |
| H | -1.2713443 | -2.5355395 | -2.7476886 |
| H | 0.9727321  | -2.4268554 | -1.8643085 |
| H | 0.1894048  | -1.7594068 | -0.4317691 |
| H | 2.9608768  | -0.6956894 | -3.9442189 |
| H | 4.3672047  | -2.6892013 | -4.3955895 |
| H | 0.8460743  | -4.9126920 | -5.4983177 |
| H | -0.5516948 | -2.9106524 | -5.0507356 |
| H | 1.4679343  | 2.1951050  | -3.2048330 |
| H | -0.1595957 | 2.2411456  | -3.9073124 |
| H | 0.0533350  | 2.3623547  | -2.1496049 |

lb\_sy\_tr\_.log

E = -1148.921184

H = -1148.586210

G = -1148.654353

NImag=0

|   |            |           |            |
|---|------------|-----------|------------|
| C | -0.3129241 | 3.0392955 | 1.2494343  |
| C | 0.6638731  | 2.3323639 | 0.3465333  |
| C | -0.9726087 | 2.1613211 | 2.0891008  |
| O | -1.9270359 | 2.3667395 | 2.9115554  |
| C | 1.9372974  | 3.1627123 | 0.0765385  |
| C | 2.8919139  | 2.6918094 | -0.9893109 |
| C | 3.3561152  | 1.3701901 | -1.0482981 |
| C | 4.2193693  | 0.9695831 | -2.0600191 |
| C | 4.6268689  | 1.8981936 | -3.0257402 |
| C | 4.1767733  | 3.2213418 | -2.9811856 |
| C | 3.3130408  | 3.6072096 | -1.9624305 |
| C | -0.4227628 | 0.7475981 | 1.8554111  |
| C | 0.8484232  | 0.9513356 | 1.0214334  |
| S | 2.7947713  | 3.5364002 | 1.6979275  |



|   |            |            |            |
|---|------------|------------|------------|
| C | 4.2608596  | 2.4850894  | 1.7749739  |
| C | 3.5813199  | 5.1130500  | 1.3109103  |
| C | 5.5182614  | 1.4850650  | -4.0776121 |
| N | 6.2358141  | 1.1534657  | -4.9238541 |
| C | -0.6931187 | 4.4744875  | 1.0497439  |
| H | 0.2599279  | 2.1971287  | -0.6765468 |
| H | 1.6066184  | 4.1722226  | -0.1948667 |
| H | 3.0571448  | 0.6460475  | -0.2987750 |
| H | 4.5782741  | -0.0532353 | -2.1045673 |
| H | 4.4971812  | 3.9327448  | -3.7349364 |
| H | 2.9533546  | 4.6318664  | -1.9258501 |
| H | -0.2346424 | 0.2272583  | 2.8014376  |
| H | -1.1746357 | 0.1603583  | 1.3094756  |
| H | 1.0210224  | 0.1487523  | 0.2990641  |
| H | 1.7161410  | 0.9752746  | 1.6937260  |
| H | 4.7880737  | 2.7817110  | 2.6845634  |
| H | 3.9473902  | 1.4438262  | 1.8568836  |
| H | 4.8880758  | 2.6452302  | 0.8967603  |
| H | 4.2027360  | 5.3827424  | 2.1669135  |
| H | 2.7910423  | 5.8534592  | 1.1772664  |
| H | 4.1888104  | 5.0145521  | 0.4086900  |
| H | -1.5572646 | 4.7095801  | 1.6810049  |
| H | 0.0988081  | 5.1962788  | 1.3116422  |
| H | -0.9721093 | 4.6959504  | 0.0064026  |

lb\_sy\_tr\_1.log

E = -1148.924233

H = -1148.588877

G = -1148.656122

NImag=0

|   |            |            |            |
|---|------------|------------|------------|
| C | -0.3334372 | 3.0032956  | 1.0602151  |
| C | 0.6291887  | 2.4434486  | 0.0551395  |
| C | -0.5043046 | 2.1561570  | 2.1399197  |
| O | -1.0885284 | 2.3694672  | 3.2547841  |
| C | 2.0100594  | 3.1732365  | 0.0980941  |
| C | 2.9720770  | 2.7225844  | -0.9749975 |
| C | 3.7831251  | 1.5853934  | -0.8635669 |
| C | 4.5886475  | 1.1836517  | -1.9219997 |
| C | 4.5782245  | 1.9195403  | -3.1124141 |
| C | 3.7735812  | 3.0571397  | -3.2412820 |
| C | 2.9826211  | 3.4529188  | -2.1700139 |
| C | 0.2029272  | 0.8229582  | 1.8567016  |
| C | 0.6790355  | 0.9326570  | 0.3988816  |
| S | 2.7641336  | 2.9890422  | 1.7838503  |
| C | 4.3736330  | 3.7801915  | 1.5514533  |
| C | 1.9803789  | 4.2704257  | 2.7936549  |
| C | 5.4090777  | 1.5064838  | -4.2115161 |
| N | 6.0781231  | 1.1744326  | -5.0966708 |
| C | -0.8415824 | 4.4099848  | 0.9913712  |
| H | 0.3177168  | 2.5945945  | -0.9912818 |
| H | 1.8456629  | 4.2524032  | -0.0028715 |
| H | 3.8103899  | 1.0011365  | 0.0527274  |
| H | 5.2205275  | 0.3067332  | -1.8292992 |
| H | 3.7763154  | 3.6251729  | -4.1656396 |
| H | 2.3625043  | 4.3402941  | -2.2608626 |
| H | 1.0312210  | 0.6874444  | 2.5663133  |
| H | -0.4833256 | -0.0173646 | 2.0128721  |
| H | -0.0211781 | 0.4142441  | -0.2628676 |
| H | 1.6609476  | 0.4802999  | 0.2317528  |
| H | 4.7927609  | 3.9312999  | 2.5478711  |
| H | 5.0174591  | 3.1134299  | 0.9789312  |

|   |            |           |           |
|---|------------|-----------|-----------|
| H | 4.2375865  | 4.7349298 | 1.0385920 |
| H | 2.6271476  | 4.3946358 | 3.6654171 |
| H | 0.9927860  | 3.9172932 | 3.0934132 |
| H | 1.9277696  | 5.1974611 | 2.2198139 |
| H | -0.0424492 | 5.1684595 | 0.9771143 |
| H | -1.4534178 | 4.5969832 | 0.0963541 |
| H | -1.4647054 | 4.6158404 | 1.8690449 |

lb\_sy\_tr\_1\_r.log

E = -1148.921115  
H = -1148.586023  
G = -1148.653804

NImag=0

|   |            |            |            |
|---|------------|------------|------------|
| C | 1.6118996  | -1.7002628 | 1.5982012  |
| C | 1.1356288  | -1.1390371 | 0.2756527  |
| C | 2.9716678  | -1.5035777 | 1.7787406  |
| O | 3.7134778  | -1.8052437 | 2.7709824  |
| C | 0.4372807  | 0.2313377  | 0.4915010  |
| C | -0.6277344 | 0.2048052  | 1.5612591  |
| C | -1.7375419 | -0.6409246 | 1.4429554  |
| C | -2.6976545 | -0.6853004 | 2.4448146  |
| C | -2.5409761 | 0.1219329  | 3.5790977  |
| C | -1.4375665 | 0.9728326  | 3.7082906  |
| C | -0.4906566 | 1.0150587  | 2.6908096  |
| C | 3.5452415  | -0.8153772 | 0.5332770  |
| C | 2.4541724  | -1.0000976 | -0.5265060 |
| S | -0.4715661 | 0.8354566  | -1.0426090 |
| C | -1.1385030 | 2.4105605  | -0.4613091 |
| C | 0.7872518  | 1.4564339  | -2.1783345 |
| C | -3.5293430 | 0.0778842  | 4.6239734  |
| N | -4.3255939 | 0.0435807  | 5.4642276  |
| C | 0.7430623  | -2.4158978 | 2.5917259  |
| H | 0.4168768  | -1.7993020 | -0.2363222 |
| H | 1.1750266  | 1.0139675  | 0.7064653  |
| H | -1.8485231 | -1.2849525 | 0.5739832  |
| H | -3.5574435 | -1.3413392 | 2.3593010  |
| H | -1.3296659 | 1.5934824  | 4.5917201  |
| H | 0.3688560  | 1.6732891  | 2.7791965  |
| H | 3.7390116  | 0.2458640  | 0.7463291  |
| H | 4.5014453  | -1.2645771 | 0.2433634  |
| H | 2.6201661  | -1.9381592 | -1.0664623 |
| H | 2.4446953  | -0.1964986 | -1.2650929 |
| H | -1.5256399 | 2.9327665  | -1.3381759 |
| H | -1.9514978 | 2.2032247  | 0.2345423  |
| H | -0.3437675 | 2.9876511  | 0.0167366  |
| H | 0.2686110  | 2.1421512  | -2.8521469 |
| H | 1.1860831  | 0.6198793  | -2.7499708 |
| H | 1.5673764  | 1.9794293  | -1.6218378 |
| H | 0.1886812  | -1.7604336 | 3.2830030  |
| H | -0.0085462 | -3.0502466 | 2.1004791  |
| H | 1.3729528  | -3.0643475 | 3.2130438  |

lb\_sy\_tr\_1\_ts1.log

E = -1148.899282  
H = -1148.567516  
G = -1148.637808

NImag=1

|   |           |            |            |
|---|-----------|------------|------------|
| C | 2.4784079 | -1.3523923 | 0.6451956  |
| C | 1.1231581 | -1.3034930 | 0.3081665  |
| C | 3.2785283 | -1.3406877 | -0.5373745 |

|   |            |            |            |
|---|------------|------------|------------|
| O | 4.5202011  | -1.3112675 | -0.6162506 |
| C | 0.2381710  | 0.6221810  | 0.6252657  |
| C | -1.1666752 | 0.3731691  | 0.3947290  |
| C | -1.8383636 | 0.6276689  | -0.8263919 |
| C | -3.1594461 | 0.2573534  | -1.0116209 |
| C | -3.8627203 | -0.3870732 | 0.0187931  |
| C | -3.2188127 | -0.6527935 | 1.2390849  |
| C | -1.9002595 | -0.2769450 | 1.4193711  |
| C | 2.3551728  | -1.3278524 | -1.7558987 |
| C | 0.9534252  | -1.5658052 | -1.1787313 |
| S | 0.9898847  | 1.8191396  | -0.4219107 |
| C | 0.3447958  | 3.4342073  | 0.0981328  |
| C | 2.6545406  | 1.9502889  | 0.2596883  |
| C | -5.2292340 | -0.7664861 | -0.1713416 |
| N | -6.3372945 | -1.0756010 | -0.3255578 |
| C | 3.0470881  | -1.2396794 | 2.0241083  |
| H | 0.3554689  | -1.6527670 | 0.9980433  |
| H | 0.5308781  | 0.7777992  | 1.6642421  |
| H | -1.3267155 | 1.1250370  | -1.6464640 |
| H | -3.6557725 | 0.4670236  | -1.9541527 |
| H | -3.7606908 | -1.1475834 | 2.0392061  |
| H | -1.4131246 | -0.4768297 | 2.3700762  |
| H | 2.4390165  | -0.3465466 | -2.2428770 |
| H | 2.6642838  | -2.0779089 | -2.4898164 |
| H | 0.6464030  | -2.6090629 | -1.3167010 |
| H | 0.1788864  | -0.9441635 | -1.6386120 |
| H | 0.8789862  | 4.2076325  | -0.4589536 |
| H | -0.7172085 | 3.4585267  | -0.1523359 |
| H | 0.4948265  | 3.5448726  | 1.1740055  |
| H | 3.1114571  | 2.8291091  | -0.1989125 |
| H | 3.2187029  | 1.0571657  | -0.0050463 |
| H | 2.5857934  | 2.0699504  | 1.3427746  |
| H | 3.3370187  | -0.2050663 | 2.2647225  |
| H | 2.3242554  | -1.5600865 | 2.7819010  |
| H | 3.9489465  | -1.8517648 | 2.1324027  |

lb\_sy\_tr\_1\_ts2.log  
E = -1148.915553  
H = -1148.582477  
G = -1148.651428

NImag=1

|   |            |            |            |
|---|------------|------------|------------|
| C | 1.6400902  | -1.7423139 | -0.4190227 |
| C | 1.7014355  | -0.3568958 | -1.0266317 |
| C | 2.7389299  | -1.9409814 | 0.4326087  |
| O | 3.0113348  | -2.9403807 | 1.1504672  |
| C | 0.8174465  | 0.3146616  | -0.0263543 |
| C | -0.6365460 | 0.0185996  | 0.0030661  |
| C | -1.3685361 | -0.1481886 | -1.1815623 |
| C | -2.7319479 | -0.4015935 | -1.1357766 |
| C | -3.3725533 | -0.4941013 | 0.1076353  |
| C | -2.6564303 | -0.3292503 | 1.2987186  |
| C | -1.2926994 | -0.0682425 | 1.2369668  |
| C | 3.6495438  | -0.7040718 | 0.3737552  |
| C | 3.1761110  | 0.0488303  | -0.8760231 |
| S | 0.8472845  | 2.4946924  | -0.4507233 |
| C | -0.7618279 | 3.1082718  | 0.0926698  |
| C | 1.8504195  | 3.0065753  | 0.9621351  |
| C | -4.7850333 | -0.7627977 | 0.1586448  |
| N | -5.9222776 | -0.9783283 | 0.1989761  |
| C | 0.5878867  | -2.7740542 | -0.6884362 |
| H | 1.3247994  | -0.2664824 | -2.0511584 |

|   |            |            |            |
|---|------------|------------|------------|
| H | 1.2624234  | 0.4144238  | 0.9647708  |
| H | -0.8740696 | -0.0760713 | -2.1456893 |
| H | -3.3017603 | -0.5300056 | -2.0500510 |
| H | -3.1639552 | -0.4050139 | 2.2545500  |
| H | -0.7253852 | 0.0630949  | 2.1545175  |
| H | 3.5191970  | -0.1084962 | 1.2890826  |
| H | 4.7019539  | -0.9994981 | 0.3284184  |
| H | 3.7166611  | -0.3163851 | -1.7551976 |
| H | 3.3269619  | 1.1333601  | -0.8264054 |
| H | -0.7266151 | 4.1999980  | 0.1042634  |
| H | -1.5138073 | 2.7743646  | -0.6246841 |
| H | -0.9924491 | 2.7262919  | 1.0899124  |
| H | 1.8721813  | 4.0972550  | 1.0048755  |
| H | 2.8635341  | 2.6273020  | 0.8166642  |
| H | 1.4243119  | 2.5987833  | 1.8822809  |
| H | -0.3211722 | -2.6734495 | -0.0743518 |
| H | 0.2624969  | -2.7643586 | -1.7364869 |
| H | 1.0025286  | -3.7662004 | -0.4752215 |

lb\_sy\_tr\_2.log

E = -1148.926530

H = -1148.591736

G = -1148.660045

NImag=0

|   |            |            |            |
|---|------------|------------|------------|
| C | 0.5769079  | 2.0912138  | 1.4237520  |
| C | 0.6764736  | 3.4849524  | 0.8753410  |
| C | 0.0914631  | 1.1966273  | 0.4839511  |
| O | -0.0567588 | -0.0669262 | 0.5652957  |
| C | 2.1057618  | 3.9798948  | 0.4675736  |
| C | 2.7903879  | 3.1214462  | -0.5609297 |
| C | 3.2035614  | 1.8150216  | -0.2638640 |
| C | 3.7505667  | 1.0101336  | -1.2561675 |
| C | 3.8895405  | 1.5171992  | -2.5538863 |
| C | 3.5009564  | 2.8270781  | -2.8592324 |
| C | 2.9583186  | 3.6220954  | -1.8566819 |
| C | -0.2562901 | 1.9577148  | -0.8038225 |
| C | -0.2079867 | 3.4364419  | -0.4002242 |
| S | 3.2065914  | 4.0781939  | 1.9452931  |
| C | 4.5583738  | 5.0781126  | 1.2938200  |
| C | 2.3651521  | 5.2929929  | 2.9773683  |
| C | 4.4514912  | 0.6848515  | -3.5843939 |
| N | 4.9040107  | 0.0159213  | -4.4145898 |
| C | 1.0772467  | 1.6798859  | 2.7768611  |
| H | 0.2969417  | 4.2567846  | 1.5612082  |
| H | 2.0431791  | 5.0159706  | 0.1129270  |
| H | 3.0944589  | 1.4173011  | 0.7401748  |
| H | 4.0657778  | -0.0036292 | -1.0324561 |
| H | 3.6253444  | 3.2120241  | -3.8658430 |
| H | 2.6510823  | 4.6391157  | -2.0835760 |
| H | 0.4858022  | 1.7124110  | -1.5781886 |
| H | -1.2361676 | 1.6536554  | -1.1889722 |
| H | -1.2106784 | 3.7808244  | -0.1280477 |
| H | 0.1596246  | 4.0973368  | -1.1937781 |
| H | 5.2199737  | 5.3151790  | 2.1290033  |
| H | 5.0926908  | 4.4741964  | 0.5585765  |
| H | 4.1547019  | 5.9861108  | 0.8408745  |
| H | 3.0916058  | 5.6297235  | 3.7196754  |
| H | 1.5297991  | 4.8006375  | 3.4751494  |
| H | 2.0266070  | 6.1264343  | 2.3579147  |
| H | 2.1545912  | 1.4366304  | 2.8109052  |
| H | 0.9089714  | 2.4536937  | 3.5394973  |

H 0.5537258 0.7747489 3.1069917

1b\_sy\_tr\_2\_ts1.log

E = -1148.903732

H = -1148.571642

G = -1148.639159

NImag=1

|   |            |            |            |
|---|------------|------------|------------|
| C | -1.0222047 | 2.0212971  | -0.2165148 |
| C | -1.3668445 | 1.3374753  | 0.9516050  |
| C | 0.3223193  | 2.5079696  | -0.1287382 |
| O | 0.9518545  | 3.1662062  | -0.9753193 |
| C | -1.2243692 | -0.8001314 | 0.6924437  |
| C | 0.1621845  | -0.9732901 | 0.3259737  |
| C | 0.6663624  | -0.5457353 | -0.9257026 |
| C | 2.0276708  | -0.5539972 | -1.1874557 |
| C | 2.9291545  | -0.9819046 | -0.2025774 |
| C | 2.4495821  | -1.4306297 | 1.0430877  |
| C | 1.0911809  | -1.4274490 | 1.2942806  |
| C | 0.8932131  | 2.1367969  | 1.2405100  |
| C | -0.3020127 | 1.5616982  | 2.0143821  |
| S | -2.3734046 | -1.2444187 | -0.5608953 |
| C | -2.6984806 | -3.0092360 | -0.3046375 |
| C | -3.9484436 | -0.5783325 | 0.0090061  |
| C | 4.3362172  | -0.9800450 | -0.4704157 |
| N | 5.4766445  | -0.9793746 | -0.6851022 |
| C | -1.8645219 | 2.1769720  | -1.4444260 |
| H | -2.3990311 | 1.2237757  | 1.2739495  |
| H | -1.5275658 | -1.2126537 | 1.6567694  |
| H | -0.0133117 | -0.1949637 | -1.6967226 |
| H | 2.4012956  | -0.2124851 | -2.1479876 |
| H | 3.1485159  | -1.7795265 | 1.7969795  |
| H | 0.7225335  | -1.7741035 | 2.2558962  |
| H | 1.6965177  | 1.4025865  | 1.1008288  |
| H | 1.3334162  | 3.0184303  | 1.7170710  |
| H | -0.6859653 | 2.2898310  | 2.7385091  |
| H | -0.0600622 | 0.6520778  | 2.5723414  |
| H | -3.4748724 | -3.3218217 | -1.0065189 |
| H | -1.7679430 | -3.5403141 | -0.5125987 |
| H | -3.0141667 | -3.1670357 | 0.7287876  |
| H | -4.7314458 | -1.0744705 | -0.5674209 |
| H | -3.9682179 | 0.4925714  | -0.1916980 |
| H | -4.0658168 | -0.7844141 | 1.0751555  |
| H | -1.8242121 | 1.2919576  | -2.0990322 |
| H | -2.9190838 | 2.3526475  | -1.2033666 |
| H | -1.5064773 | 3.0236166  | -2.0395117 |

1b\_sy\_tr\_3.log

E = -1148.915723

H = -1148.580576

G = -1148.648427

NImag=0

|   |            |           |            |
|---|------------|-----------|------------|
| C | -0.3842836 | 2.7972979 | 1.0526171  |
| C | 0.7339550  | 2.1582898 | 0.2793447  |
| C | -0.5403155 | 2.2558624 | 2.3116676  |
| O | -1.3091643 | 2.6087905 | 3.2687790  |
| C | 1.8713173  | 3.1454477 | -0.0757093 |
| C | 2.8635743  | 2.7152518 | -1.1443445 |
| C | 3.0653859  | 1.3693983 | -1.4677246 |
| C | 3.9688766  | 1.0099090 | -2.4630803 |
| C | 4.6799591  | 2.0049224 | -3.1403087 |

|   |            |            |            |
|---|------------|------------|------------|
| C | 4.4848831  | 3.3573403  | -2.8341849 |
| C | 3.5766490  | 3.7001976  | -1.8424171 |
| C | 0.4517124  | 1.1006373  | 2.4934931  |
| C | 1.0916078  | 0.8941216  | 1.1128110  |
| S | 2.9268198  | 3.8643860  | 1.2793883  |
| C | 1.8615647  | 4.4397465  | 2.6199293  |
| C | 3.8417180  | 2.5175434  | 2.0531639  |
| C | 5.6167154  | 1.6356092  | -4.1685443 |
| N | 6.3711729  | 1.3387187  | -4.9953836 |
| C | -1.1254542 | 3.9945852  | 0.5442957  |
| H | 0.4125407  | 1.8533432  | -0.7331148 |
| H | 1.3984351  | 4.0721624  | -0.4279388 |
| H | 2.5129823  | 0.5877322  | -0.9595604 |
| H | 4.1208999  | -0.0343110 | -2.7149981 |
| H | 5.0322858  | 4.1234178  | -3.3729966 |
| H | 3.4125207  | 4.7501317  | -1.6134856 |
| H | 1.1824905  | 1.3728532  | 3.2703166  |
| H | -0.0601559 | 0.2027476  | 2.8583368  |
| H | 0.6420917  | 0.0264019  | 0.6196314  |
| H | 2.1653949  | 0.6972923  | 1.1645464  |
| H | 2.5188473  | 5.0070512  | 3.2834479  |
| H | 1.1114149  | 5.1022268  | 2.1839821  |
| H | 1.3947992  | 3.6072601  | 3.1429467  |
| H | 4.6047875  | 2.9929035  | 2.6726085  |
| H | 4.3211948  | 1.9394579  | 1.2600966  |
| H | 3.1859811  | 1.8977441  | 2.6626814  |
| H | -1.9732009 | 4.2071296  | 1.2049305  |
| H | -0.5143067 | 4.9132735  | 0.5066262  |
| H | -1.5195964 | 3.8494264  | -0.4727492 |

1b\_sy\_tr\_3\_r.log

E = -1148.919162

H = -1148.584340

G = -1148.652944

NImag=0

|   |            |            |            |
|---|------------|------------|------------|
| C | 1.5454229  | -1.6403671 | 1.5847429  |
| C | 0.9735786  | -1.2286563 | 0.2467258  |
| C | 2.8766853  | -1.2734549 | 1.7034500  |
| O | 3.6778605  | -1.4153151 | 2.6847637  |
| C | 0.1499276  | 0.0808530  | 0.3984621  |
| C | -0.8954230 | 0.0138561  | 1.4850962  |
| C | -1.9406753 | -0.9146146 | 1.4120016  |
| C | -2.8631643 | -1.0189301 | 2.4437329  |
| C | -2.7349248 | -0.1853602 | 3.5630859  |
| C | -1.6990661 | 0.7513875  | 3.6455455  |
| C | -0.7875522 | 0.8485522  | 2.5994586  |
| C | 3.3287059  | -0.6133002 | 0.3924272  |
| C | 2.2411005  | -1.0074002 | -0.6125050 |
| S | -0.7777214 | 0.6465467  | -1.1467375 |
| C | 0.3002677  | 1.8887790  | -1.8867953 |
| C | -0.6841487 | -0.7012908 | -2.3420849 |
| C | -3.6840340 | -0.2918621 | 4.6391862  |
| N | -4.4484919 | -0.3771140 | 5.5050670  |
| C | 0.7841320  | -2.3820664 | 2.6446596  |
| H | 0.3112245  | -1.9943630 | -0.1836379 |
| H | 0.8284202  | 0.9216340  | 0.5843097  |
| H | -2.0302215 | -1.5785633 | 0.5546496  |
| H | -3.6718201 | -1.7405777 | 2.3936408  |
| H | -1.6122901 | 1.3918480  | 4.5170636  |
| H | 0.0242082  | 1.5681516  | 2.6560863  |
| H | 3.3924584  | 0.4768736  | 0.5224950  |

|   |            |            |            |
|---|------------|------------|------------|
| H | 4.3258407  | -0.9614964 | 0.1020937  |
| H | 2.5004319  | -1.9608735 | -1.0853070 |
| H | 2.1166056  | -0.2732216 | -1.4136536 |
| H | -0.1846616 | 2.2175450  | -2.8081300 |
| H | 0.3597882  | 2.7213459  | -1.1835739 |
| H | 1.2880691  | 1.4783831  | -2.0937431 |
| H | -1.1423876 | -0.3182718 | -3.2565269 |
| H | -1.2773630 | -1.5321310 | -1.9576183 |
| H | 0.3482100  | -0.9993566 | -2.5236980 |
| H | 1.4943105  | -2.9083108 | 3.2940446  |
| H | 0.1648284  | -1.7504025 | 3.3019456  |
| H | 0.1066156  | -3.1328593 | 2.2129685  |

lb\_sy\_tr\_3\_ts2.log  
E = -1148.912492  
H = -1148.579358  
G = -1148.648567

NImag=1

|   |            |            |            |
|---|------------|------------|------------|
| C | -1.2260315 | 1.7987809  | -0.5673865 |
| C | -1.5668820 | 0.3599324  | -0.8979302 |
| C | -2.2194127 | 2.3513376  | 0.2582055  |
| O | -2.2663275 | 3.5021857  | 0.7684399  |
| C | -0.7509592 | -0.2547307 | 0.2006378  |
| C | 0.7345685  | -0.1335092 | 0.1627826  |
| C | 1.4443009  | -0.3219369 | -1.0309102 |
| C | 2.8278326  | -0.2138413 | -1.0519534 |
| C | 3.5118755  | 0.0878648  | 0.1335215  |
| C | 2.8167056  | 0.2731459  | 1.3343541  |
| C | 1.4320438  | 0.1545112  | 1.3410192  |
| C | -3.3403429 | 1.3208331  | 0.4537029  |
| C | -3.0822172 | 0.2825696  | -0.6448401 |
| S | -0.8909945 | -2.4648358 | 0.2547567  |
| C | -2.3104147 | -2.7584003 | 1.3303412  |
| C | -1.5704788 | -2.8638628 | -1.3692308 |
| C | 4.9451143  | 0.2083451  | 0.1156498  |
| N | 6.0993030  | 0.3050581  | 0.1011739  |
| C | -0.0459605 | 2.5695425  | -1.0761048 |
| H | -1.2664946 | 0.0198579  | -1.8946437 |
| H | -1.1743172 | -0.1155614 | 1.1965186  |
| H | 0.9159343  | -0.5497554 | -1.9524917 |
| H | 3.3795144  | -0.3580203 | -1.9750279 |
| H | 3.3570914  | 0.5078769  | 2.2454961  |
| H | 0.8825455  | 0.2992370  | 2.2670618  |
| H | -3.2748333 | 0.8825088  | 1.4598713  |
| H | -4.3208566 | 1.7995285  | 0.3736866  |
| H | -3.5878919 | 0.5860636  | -1.5675626 |
| H | -3.4365871 | -0.7196357 | -0.3896874 |
| H | -2.5801025 | -3.8149902 | 1.2720073  |
| H | -1.9978335 | -2.5177998 | 2.3483371  |
| H | -3.1586349 | -2.1358374 | 1.0419322  |
| H | -1.7964620 | -3.9321089 | -1.3939492 |
| H | -0.8015707 | -2.6396167 | -2.1112681 |
| H | -2.4718888 | -2.2826058 | -1.5692985 |
| H | -0.3097682 | 3.6330798  | -1.1163767 |
| H | 0.8573844  | 2.4932594  | -0.4506885 |
| H | 0.2412397  | 2.2563377  | -2.0873850 |

lb\_sy\_tr\_4.log  
E = -1148.914301  
H = -1148.578938

G = -1148.646534  
NImag=0

|   |            |           |            |
|---|------------|-----------|------------|
| C | -0.3812296 | 2.9020121 | 1.0895343  |
| C | 0.7299444  | 2.2362183 | 0.3276439  |
| C | -0.7239153 | 2.2330445 | 2.2441480  |
| O | -1.5827744 | 2.5324364 | 3.1417166  |
| C | 1.8576715  | 3.2162415 | -0.0755389 |
| C | 2.8419795  | 2.7667978 | -1.1332619 |
| C | 3.2469698  | 1.4318260 | -1.2458008 |
| C | 4.1639449  | 1.0541517 | -2.2197301 |
| C | 4.6870455  | 2.0218044 | -3.0849167 |
| C | 4.2905016  | 3.3602494 | -2.9871411 |
| C | 3.3672619  | 3.7210396 | -2.0134985 |
| C | 0.1204143  | 0.9606665 | 2.3679655  |
| C | 1.1085253  | 0.9936072 | 1.1885882  |
| S | 2.8977246  | 3.9877439 | 1.2880488  |
| C | 2.0664475  | 3.7973396 | 2.8824619  |
| C | 4.3306721  | 2.9149207 | 1.5235501  |
| C | 5.6410352  | 1.6341941 | -4.0902961 |
| N | 6.4092659  | 1.3224327 | -4.8987383 |
| C | -0.9873370 | 4.1995996 | 0.6543029  |
| H | 0.3998272  | 1.9056611 | -0.6762389 |
| H | 1.3691728  | 4.1210240 | -0.4528088 |
| H | 2.8527068  | 0.6768065 | -0.5756345 |
| H | 4.4763490  | 0.0191233 | -2.3099393 |
| H | 4.6965158  | 4.1010626 | -3.6677664 |
| H | 3.0467545  | 4.7570835 | -1.9389557 |
| H | 0.6254681  | 0.9413436 | 3.3435299  |
| H | -0.5315899 | 0.0787962 | 2.3393706  |
| H | 1.0514889  | 0.0818519 | 0.5875905  |
| H | 2.1398180  | 1.0563932 | 1.5467900  |
| H | 2.7440156  | 4.2639228 | 3.6020505  |
| H | 1.1212759  | 4.3374789 | 2.8437792  |
| H | 1.9152151  | 2.7451878 | 3.1204605  |
| H | 4.8676439  | 3.3295780 | 2.3796587  |
| H | 4.9551719  | 2.9841373 | 0.6323177  |
| H | 4.0307040  | 1.8859713 | 1.7209039  |
| H | -1.8987885 | 4.3878383 | 1.2321294  |
| H | -0.3298837 | 5.0743790 | 0.8088515  |
| H | -1.2571132 | 4.2073350 | -0.4128266 |

lb\_sy\_tr\_4\_r.log  
E = -1148.918291  
H = -1148.582759  
G = -1148.650342  
NImag=0

|   |            |            |            |
|---|------------|------------|------------|
| C | 1.2614220  | -0.9640783 | -1.3354748 |
| C | 1.4270065  | -0.7000405 | 0.1506347  |
| C | 1.4011778  | -2.3148114 | -1.6237826 |
| O | 1.4572301  | -2.9019268 | -2.7538680 |
| C | 0.4007966  | 0.3158915  | 0.6860224  |
| C | 0.4448671  | 1.6945633  | 0.0625193  |
| C | 1.6508047  | 2.3885978  | -0.0900473 |
| C | 1.6688765  | 3.6469679  | -0.6793077 |
| C | 0.4682713  | 4.2158065  | -1.1202265 |
| C | -0.7463246 | 3.5375774  | -0.9650226 |
| C | -0.7489324 | 2.2829953  | -0.3686558 |
| C | 1.5941331  | -3.0978393 | -0.3228578 |
| C | 1.2320353  | -2.1028265 | 0.7802752  |
| S | 0.4660977  | 0.6640186  | 2.5321115  |
| C | -0.2339091 | -0.7738615 | 3.3702527  |



|   |            |            |            |
|---|------------|------------|------------|
| C | 2.2028845  | 0.5518306  | 3.0022491  |
| C | 0.4823530  | 5.5151892  | -1.7383724 |
| N | 0.4935564  | 6.5612382  | -2.2352009 |
| C | 1.3810188  | 0.0777310  | -2.4119744 |
| H | 2.4334381  | -0.3077196 | 0.3851007  |
| H | -0.6100181 | -0.0965070 | 0.5794973  |
| H | 2.5892283  | 1.9439627  | 0.2275298  |
| H | 2.6032497  | 4.1836757  | -0.8056411 |
| H | -1.6704511 | 3.9888702  | -1.3104341 |
| H | -1.6864763 | 1.7470967  | -0.2496986 |
| H | 0.9847078  | -4.0079454 | -0.2971380 |
| H | 2.6457817  | -3.4113766 | -0.2614545 |
| H | 1.8206900  | -2.2436449 | 1.6924276  |
| H | 0.1745410  | -2.2289075 | 1.0417173  |
| H | -0.3600213 | -0.4780214 | 4.4139583  |
| H | -1.2096014 | -0.9745018 | 2.9241383  |
| H | 0.4263499  | -1.6351746 | 3.2898521  |
| H | 2.2313373  | 0.7021834  | 4.0836698  |
| H | 2.7426812  | 1.3603312  | 2.5074188  |
| H | 2.6113439  | -0.4230757 | 2.7366156  |
| H | 1.4622909  | -0.4413146 | -3.3740126 |
| H | 0.5348873  | 0.7748248  | -2.4854515 |
| H | 2.2816578  | 0.7024852  | -2.2943931 |

lb\_sy\_tr\_4\_ts1.log

E = -1148.894302

H = -1148.561688

G = -1148.631712

NImag=1

|   |            |            |            |
|---|------------|------------|------------|
| C | 2.6758670  | -1.0549260 | 0.7248279  |
| C | 1.2890146  | -1.2021237 | 0.5794684  |
| C | 3.3376189  | -1.2740178 | -0.5180643 |
| O | 4.5553555  | -1.1800788 | -0.7660981 |
| C | 0.2542995  | 0.6143741  | 0.8910972  |
| C | -1.1284382 | 0.3530949  | 0.5455048  |
| C | -1.7259662 | 0.6227716  | -0.7080233 |
| C | -3.0288721 | 0.2386289  | -0.9814150 |
| C | -3.7801430 | -0.4474238 | -0.0152226 |
| C | -3.2051245 | -0.7427425 | 1.2317065  |
| C | -1.9085295 | -0.3439196 | 1.5017258  |
| C | 2.3066459  | -1.7064336 | -1.5622502 |
| C | 0.9617589  | -1.7062237 | -0.8186776 |
| S | 1.1651475  | 1.9664568  | 0.2415800  |
| C | 1.6561295  | 1.5986516  | -1.4616458 |
| C | 0.0509013  | 3.3724498  | -0.0174213 |
| C | -5.1254725 | -0.8459519 | -0.3008451 |
| N | -6.2156275 | -1.1692854 | -0.5320022 |
| C | 3.3721906  | -0.6330023 | 1.9803784  |
| H | 0.6690466  | -1.5517153 | 1.4043603  |
| H | 0.4528867  | 0.6239530  | 1.9612300  |
| H | -1.1753765 | 1.1325875  | -1.4910424 |
| H | -3.4690678 | 0.4628659  | -1.9480925 |
| H | -3.7826522 | -1.2734715 | 1.9822869  |
| H | -1.4764579 | -0.5618047 | 2.4747619  |
| H | 2.3321524  | -1.0250160 | -2.4202937 |
| H | 2.5725764  | -2.7002527 | -1.9375860 |
| H | 0.5404505  | -2.7146005 | -0.7452131 |
| H | 0.2046189  | -1.0890059 | -1.3131586 |
| H | 1.8782053  | 2.5609145  | -1.9284214 |
| H | 2.5658047  | 1.0019994  | -1.4156882 |
| H | 0.8681762  | 1.0810778  | -2.0068153 |

|   |            |            |            |
|---|------------|------------|------------|
| H | 0.6718852  | 4.2156555  | -0.3269678 |
| H | -0.4192115 | 3.5874649  | 0.9436114  |
| H | -0.6992935 | 3.1507456  | -0.7755767 |
| H | 4.4239991  | -0.9358004 | 1.9576581  |
| H | 3.3552014  | 0.4590207  | 2.1173676  |
| H | 2.9071220  | -1.0736972 | 2.8698191  |

lb\_sy\_tr\_5\_r.log

E = -1148.923961  
H = -1148.588857  
G = -1148.656632

NImag=0

|   |            |            |            |
|---|------------|------------|------------|
| C | -1.5707574 | -1.5738446 | 0.9452287  |
| C | -1.4729548 | -0.6857225 | -0.2759604 |
| C | -1.9389326 | -2.8650775 | 0.6002318  |
| O | -2.2289786 | -3.8582067 | 1.3463122  |
| C | -0.2504711 | 0.2534845  | -0.2381717 |
| C | -0.2520015 | 1.3311538  | 0.8123380  |
| C | -1.4013047 | 2.0766142  | 1.1045823  |
| C | -1.3753127 | 3.0531677  | 2.0932825  |
| C | -0.1898173 | 3.2844538  | 2.8002117  |
| C | 0.9669473  | 2.5468712  | 2.5215843  |
| C | 0.9268458  | 1.5781820  | 1.5271584  |
| C | -2.0516752 | -2.9687187 | -0.9258971 |
| C | -1.3806142 | -1.6964077 | -1.4466326 |
| S | 0.0030618  | 0.9754854  | -1.9482322 |
| C | -1.4275938 | 2.0300763  | -2.2366391 |
| C | 1.2929269  | 2.2110970  | -1.7186155 |
| C | -0.1611703 | 4.2910058  | 3.8283730  |
| N | -0.1376881 | 5.1018308  | 4.6548785  |
| C | -1.6375395 | -1.0634581 | 2.3551694  |
| H | -2.3701477 | -0.0510116 | -0.3946702 |
| H | 0.6565005  | -0.3561097 | -0.1394034 |
| H | -2.3306560 | 1.8888551  | 0.5761716  |
| H | -2.2662299 | 3.6279532  | 2.3234248  |
| H | 1.8788630  | 2.7308478  | 3.0796947  |
| H | 1.8176885  | 0.9954670  | 1.3094834  |
| H | -1.5894942 | -3.8856123 | -1.3078648 |
| H | -3.1165307 | -3.0063286 | -1.1956710 |
| H | -1.8278245 | -1.3129927 | -2.3708834 |
| H | -0.3227265 | -1.9044060 | -1.6524692 |
| H | -1.2749796 | 2.4919153  | -3.2144333 |
| H | -2.3175894 | 1.3994329  | -2.2617607 |
| H | -1.4979150 | 2.7945425  | -1.4612488 |
| H | 1.4745387  | 2.6561856  | -2.6992496 |
| H | 2.1919724  | 1.6972730  | -1.3728305 |
| H | 0.9681775  | 2.9689460  | -1.0037506 |
| H | -1.8982929 | -1.9008535 | 3.0125432  |
| H | -0.7000350 | -0.6294547 | 2.7316930  |
| H | -2.4073844 | -0.2852456 | 2.4874272  |

lb\_sy\_tr\_5\_ts2.log

E = -1148.916502  
H = -1148.583232  
G = -1148.651337

NImag=1

|   |            |            |            |
|---|------------|------------|------------|
| C | -1.9549600 | -1.3957038 | 0.3647215  |
| C | -1.8050702 | 0.0704164  | 0.7137119  |
| C | -3.0572902 | -1.5786002 | -0.4842335 |
| O | -3.4762913 | -2.6418079 | -1.0167176 |

|   |            |            |            |
|---|------------|------------|------------|
| C | -0.7990996 | 0.4202694  | -0.3381224 |
| C | 0.5923681  | -0.0804229 | -0.2682002 |
| C | 1.2372918  | -0.2954847 | 0.9591885  |
| C | 2.5588639  | -0.7201803 | 0.9958722  |
| C | 3.2442682  | -0.9396781 | -0.2058062 |
| C | 2.6138017  | -0.7364524 | -1.4396487 |
| C | 1.2943177  | -0.3049949 | -1.4610943 |
| C | -3.7640481 | -0.2302301 | -0.6908339 |
| C | -3.1888785 | 0.6719691  | 0.4099855  |
| S | -0.5199618 | 2.6370011  | -0.2743888 |
| C | -0.3807811 | 2.8817446  | 1.5068482  |
| C | 1.1924279  | 2.9355694  | -0.7608350 |
| C | 4.6121819  | -1.3834751 | -0.1718888 |
| N | 5.7139268  | -1.7395917 | -0.1446765 |
| C | -1.0999999 | -2.5127602 | 0.8782556  |
| H | -1.4500311 | 0.2761354  | 1.7289446  |
| H | -1.2099544 | 0.4297845  | -1.3467864 |
| H | 0.7057364  | -0.1428843 | 1.8931524  |
| H | 3.0586871  | -0.8871168 | 1.9441713  |
| H | 3.1540578  | -0.9159340 | -2.3631848 |
| H | 0.7966914  | -0.1386292 | -2.4126705 |
| H | -3.5428277 | 0.1513537  | -1.6971227 |
| H | -4.8494221 | -0.3514739 | -0.6240477 |
| H | -3.7994840 | 0.5920549  | 1.3149501  |
| H | -3.1487274 | 1.7308183  | 0.1285267  |
| H | -0.0489313 | 3.9059759  | 1.6901786  |
| H | -1.3684302 | 2.7349357  | 1.9475036  |
| H | 0.3365006  | 2.1741711  | 1.9303224  |
| H | 1.4201011  | 3.9891799  | -0.5828605 |
| H | 1.2842870  | 2.7165011  | -1.8261698 |
| H | 1.8676669  | 2.3003277  | -0.1817677 |
| H | -1.6587722 | -3.4512305 | 0.7852859  |
| H | -0.1517531 | -2.6541589 | 0.3362552  |
| H | -0.8401381 | -2.3797722 | 1.9365388  |

lb\_sy\_tr\_6.log

E = -1148.922404  
H = -1148.587237  
G = -1148.655817

NImag=0

|   |            |           |            |
|---|------------|-----------|------------|
| C | -0.4427177 | 2.9984483 | 0.9896016  |
| C | 0.5828799  | 2.1929634 | 0.2434882  |
| C | -0.7552441 | 2.4661450 | 2.2278373  |
| O | -1.5598966 | 2.8878312 | 3.1235384  |
| C | 1.8824874  | 3.0063293 | 0.0199705  |
| C | 2.8466267  | 2.5526060 | -1.0451948 |
| C | 3.0147714  | 1.1985596 | -1.3602532 |
| C | 3.9094181  | 0.8099586 | -2.3501379 |
| C | 4.6439336  | 1.7852009 | -3.0348382 |
| C | 4.4789958  | 3.1435381 | -2.7416066 |
| C | 3.5766559  | 3.5162966 | -1.7528697 |
| C | 0.0601149  | 1.1851059 | 2.4459419  |
| C | 0.7406901  | 0.8988907 | 1.0969436  |
| S | 2.6983669  | 3.1900558 | 1.6924877  |
| C | 4.2689435  | 2.3076955 | 1.5718463  |
| C | 3.2866570  | 4.8934033 | 1.6581088  |
| C | 5.5721734  | 1.3860808 | -4.0596638 |
| N | 6.3197746  | 1.0649388 | -4.8836932 |
| C | -1.0468720 | 4.2441273 | 0.4157343  |
| H | 0.2631001  | 1.9405765 | -0.7814372 |
| H | 1.6032392  | 4.0435886 | -0.1961232 |

|   |            |            |            |
|---|------------|------------|------------|
| H | 2.4461146  | 0.4358660  | -0.8388856 |
| H | 4.0386272  | -0.2390259 | -2.5950337 |
| H | 5.0439660  | 3.8916776  | -3.2875563 |
| H | 3.4302437  | 4.5700141  | -1.5312705 |
| H | 0.7854306  | 1.3468563  | 3.2556007  |
| H | -0.5949129 | 0.3669232  | 2.7667106  |
| H | 0.2388141  | 0.0743057  | 0.5818591  |
| H | 1.7859896  | 0.5904604  | 1.2196738  |
| H | 4.7727643  | 2.4578724  | 2.5291894  |
| H | 4.0546090  | 1.2469863  | 1.4328152  |
| H | 4.8706127  | 2.7011320  | 0.7507339  |
| H | 3.8649591  | 5.0544670  | 2.5700796  |
| H | 2.4086151  | 5.5417015  | 1.6528076  |
| H | 3.9054729  | 5.0577128  | 0.7740773  |
| H | -1.8418706 | 4.6006083  | 1.0800924  |
| H | -0.3322399 | 5.0747349  | 0.2966436  |
| H | -1.4903934 | 4.0787671  | -0.5783178 |

1b\_sy\_tr\_prod\_1.log  
E = -671.039596  
H = -670.788521  
G = -670.845627

NImag=0

|   |            |            |            |
|---|------------|------------|------------|
| C | -3.1452560 | -0.7590050 | -0.0781470 |
| C | -1.8711700 | -0.2884290 | 0.5449480  |
| C | -1.8370700 | 1.2081440  | 0.3473350  |
| C | -3.1369950 | 1.6609060  | -0.3146510 |
| C | -3.7798010 | 0.3778060  | -0.8688830 |
| O | -3.6182160 | -1.8705880 | 0.0623520  |
| C | -0.9455400 | 0.3675930  | -0.5051760 |
| C | 0.5287960  | 0.2654640  | -0.3278670 |
| C | 1.2275560  | 0.8988810  | 0.7101830  |
| C | 2.6053170  | 0.7653770  | 0.8275760  |
| C | 3.3065110  | -0.0084580 | -0.1050400 |
| C | 2.6279960  | -0.6451250 | -1.1518920 |
| C | 1.2511610  | -0.5025350 | -1.2538970 |
| H | -1.2513220 | 0.2304650  | -1.5405250 |
| C | -1.3266910 | -1.0525690 | 1.7204530  |
| H | -1.3929780 | 1.8375460  | 1.1120540  |
| C | 4.7324180  | -0.1473180 | 0.0102360  |
| N | 5.8819520  | -0.2591840 | 0.1034430  |
| H | -3.7858650 | 2.1054230  | 0.4453260  |
| H | -2.9586530 | 2.4111340  | -1.0900310 |
| H | -3.5570990 | 0.2227160  | -1.9310820 |
| H | -4.8652220 | 0.3463450  | -0.7543740 |
| H | 0.7005060  | 1.5072830  | 1.4378320  |
| H | 3.1390700  | 1.2602700  | 1.6324070  |
| H | 3.1775860  | -1.2398530 | -1.8742740 |
| H | 0.7223610  | -0.9911450 | -2.0674680 |
| H | -2.1030330 | -1.1692260 | 2.4826660  |
| H | -0.9963000 | -2.0512450 | 1.4163570  |
| H | -0.4803800 | -0.5351200 | 2.1771430  |

1c.log  
E = -308.559579  
H = -308.425580  
G = -308.464111

NImag=0

|   |           |           |            |
|---|-----------|-----------|------------|
| C | 0.3297897 | 2.7547113 | -0.4777871 |
| C | 0.1859692 | 1.3235732 | -0.0151384 |

|   |            |            |            |
|---|------------|------------|------------|
| C | 1.6248330  | 0.8144503  | 0.1311831  |
| C | 2.5022090  | 1.9978936  | -0.2608035 |
| C | 1.6195122  | 3.1195829  | -0.6111258 |
| O | 3.7239190  | 1.9940491  | -0.2744543 |
| C | -0.8750075 | 3.5925889  | -0.7328009 |
| H | -0.3947711 | 0.7525874  | -0.7483110 |
| H | -0.3742435 | 1.2918277  | 0.9261265  |
| H | 1.8711657  | 0.5113978  | 1.1531215  |
| H | 1.8505322  | -0.0297889 | -0.5269938 |
| H | 1.9857755  | 4.0904004  | -0.9282400 |
| H | -0.6101827 | 4.6000056  | -1.0604750 |
| H | -1.5028940 | 3.1209103  | -1.4974909 |
| H | -1.4823077 | 3.6602092  | 0.1771918  |

lc\_sy\_c\_1.log

E = -1148.925402

H = -1148.590753

G = -1148.657742

NImag=0

|   |            |            |            |
|---|------------|------------|------------|
| C | 1.3411580  | 1.3092101  | 0.1497184  |
| C | -0.1107655 | 1.6954085  | 0.2786822  |
| C | 2.1579660  | 2.3226025  | -0.3276446 |
| O | 3.4130480  | 2.3459245  | -0.5227253 |
| C | -0.6040921 | 1.8808739  | 1.7534227  |
| C | -0.9390128 | 0.6661513  | 2.5812683  |
| C | -0.1193184 | -0.4709516 | 2.6244356  |
| C | -0.4757330 | -1.5720211 | 3.3912716  |
| C | -1.6658566 | -1.5417846 | 4.1295099  |
| C | -2.4962287 | -0.4175395 | 4.1000570  |
| C | -2.1251872 | 0.6768535  | 3.3264229  |
| C | 1.2943780  | 3.5601000  | -0.6174202 |
| C | -0.1551204 | 3.0858358  | -0.4426623 |
| S | 0.6408787  | 2.9736582  | 2.6016799  |
| C | -0.3225447 | 3.5999539  | 3.9931048  |
| C | 1.7916726  | 1.9054812  | 3.4864598  |
| C | -2.0393568 | -2.6819040 | 4.9242509  |
| N | -2.3400481 | -3.5990527 | 5.5642264  |
| C | -1.0928412 | 0.7170548  | -0.3851013 |
| H | 1.7171096  | 0.3216610  | 0.4042038  |
| H | -1.4879191 | 2.5308113  | 1.7488522  |
| H | 0.8030321  | -0.5021055 | 2.0559824  |
| H | 0.1592663  | -2.4512640 | 3.4198993  |
| H | -3.4179602 | -0.4036868 | 4.6720246  |
| H | -2.7706595 | 1.5505879  | 3.2957215  |
| H | 1.5666465  | 4.3663637  | 0.0759152  |
| H | 1.4974515  | 3.9279206  | -1.6292870 |
| H | -0.6212745 | 2.9404812  | -1.4224599 |
| H | -0.7809162 | 3.8078157  | 0.0963768  |
| H | 0.3512293  | 4.2008660  | 4.6070441  |
| H | -1.1191103 | 4.2286127  | 3.5913561  |
| H | -0.7301606 | 2.7695551  | 4.5736472  |
| H | 2.4712720  | 2.5766645  | 4.0168127  |
| H | 2.3390517  | 1.3227955  | 2.7455732  |
| H | 1.2536700  | 1.2692091  | 4.1905952  |
| H | -1.0013040 | -0.2924545 | 0.0281929  |
| H | -2.1344324 | 1.0428654  | -0.2603114 |
| H | -0.8752881 | 0.6633465  | -1.4559956 |

lc\_sy\_c\_1\_r.log

E = -1148.919706

```

H =      -1148.584816
G =      -1148.651394
NImag=0
C      0.9100290      -2.0681442      -0.1124747
C      1.6182623      -0.8903078      -0.7340456
C      1.2969790      -2.3266734      1.1925565
O      0.8810596      -3.1918499      2.0246720
C      0.5462073      0.2453894      -0.8382096
C      -0.0888268      0.7787793      0.4246112
C      0.6217806      1.4355505      1.4381986
C      -0.0333943      1.9273223      2.5618538
C      -1.4173587      1.7650826      2.6807374
C      -2.1460881      1.1140803      1.6791426
C      -1.4768741      0.6341875      0.5610024
C      2.4062441      -1.3339689      1.5772932
C      2.7883276      -0.6409048      0.2631114
S      1.0387130      1.6374881      -2.0102085
C      -0.2722714      2.8541602      -1.7856248
C      2.4465698      2.5193132      -1.3154531
C      -2.0976057      2.2742403      3.8418951
N      -2.6451238      2.6852476      4.7759673
C      2.1607393      -1.1785487      -2.1425306
H      0.0983031      -2.5800875      -0.6265655
H      -0.2570251      -0.1763897      -1.4556608
H      1.6945730      1.5677437      1.3753305
H      0.5246866      2.4329232      3.3428444
H      -3.2195331      0.9907149      1.7765654
H      -2.0406331      0.1330316      -0.2206391
H      2.0185832      -0.6383014      2.3327286
H      3.2502401      -1.8628616      2.0340652
H      3.6724021      -1.1305064      -0.1601528
H      3.0498722      0.4146739      0.3779923
H      -0.0689941      3.6671603      -2.4855476
H      -1.2185776      2.3733636      -2.0417335
H      -0.2798959      3.2185785      -0.7568707
H      2.6071608      3.3790971      -1.9705141
H      3.3164670      1.8629408      -1.3574209
H      2.2387098      2.8542481      -0.2989883
H      1.3491324      -1.3293245      -2.8647579
H      2.8131143      -0.3790605      -2.5203753
H      2.7573596      -2.0944687      -2.1081822

```

```

lc_sy_c_1_ts1.log
E =      -1148.896350
H =      -1148.564287
G =      -1148.631598
NImag=1
C      1.6828389      -1.6855179      0.5566277
C      1.5105754      -1.3031232      -0.7799045
C      2.9705113      -1.3098649      1.0424574
O      3.4579104      -1.4769110      2.1727819
C      0.3892545      0.5833558      -0.9647045
C      -0.9719930      0.3361528      -0.5195032
C      -1.3259676      0.2121056      0.8428251
C      -2.6190054      -0.1190514      1.2226606
C      -3.5985227      -0.3497402      0.2473967
C      -3.2676966      -0.2494726      -1.1148913
C      -1.9780102      0.0888956      -1.4831911
C      3.7210315      -0.6067617      -0.0940482
C      2.8615448      -0.8643097      -1.3360034
S      1.3029818      1.9307765      -0.3058049

```

|   |            |            |            |
|---|------------|------------|------------|
| C | 0.1968716  | 3.3667332  | -0.2315732 |
| C | 1.5767141  | 1.7053307  | 1.4743211  |
| C | -4.9345802 | -0.6891325 | 0.6385508  |
| N | -6.0165884 | -0.9634996 | 0.9544056  |
| C | 0.5752118  | -2.0472716 | -1.6927494 |
| H | 0.9352239  | -2.1948048 | 1.1574014  |
| H | 0.5011861  | 0.6798992  | -2.0447262 |
| H | -0.5829198 | 0.3539264  | 1.6187636  |
| H | -2.8723825 | -0.2094119 | 2.2744524  |
| H | -4.0269011 | -0.4272811 | -1.8701024 |
| H | -1.7286196 | 0.1731214  | -2.5374344 |
| H | 3.8020212  | 0.4621075  | 0.1472655  |
| H | 4.7413463  | -0.9917663 | -0.1761179 |
| H | 3.2654750  | -1.7060600 | -1.9135950 |
| H | 2.7893491  | -0.0126601 | -2.0187872 |
| H | 0.7383165  | 4.1768239  | 0.2631981  |
| H | -0.0471046 | 3.6448688  | -1.2579760 |
| H | -0.7036513 | 3.1032272  | 0.3270318  |
| H | 2.4742910  | 2.2738263  | 1.7252307  |
| H | 1.7311769  | 0.6470995  | 1.6818439  |
| H | 0.7194140  | 2.0866231  | 2.0309295  |
| H | -0.3873068 | -2.2467946 | -1.2132661 |
| H | 0.4017205  | -1.5210078 | -2.6360065 |
| H | 1.0384090  | -3.0142787 | -1.9267603 |

lc\_sy\_c\_1\_ts2.log

E = -1148.912371

H = -1148.579141

G = -1148.645823

NImag=1

|   |            |            |            |
|---|------------|------------|------------|
| C | -1.9350499 | 1.6885012  | -0.9651083 |
| C | -2.2146823 | 0.4423489  | -0.1613666 |
| C | -1.4047592 | 2.7262067  | -0.1837300 |
| O | -1.0085211 | 3.8659673  | -0.5327527 |
| C | -1.0264408 | -0.3003274 | -0.7143567 |
| C | 0.4073820  | -0.0496264 | -0.3958499 |
| C | 0.9167865  | 0.0407919  | 0.9086772  |
| C | 2.2804900  | 0.1972447  | 1.1281557  |
| C | 3.1548051  | 0.2567523  | 0.0376972  |
| C | 2.6687372  | 0.1531328  | -1.2719475 |
| C | 1.3060208  | -0.0059327 | -1.4751655 |
| C | -1.3720290 | 2.2705546  | 1.2807399  |
| C | -2.1413350 | 0.9407867  | 1.3025038  |
| S | -1.2502539 | -2.4898158 | -0.2817302 |
| C | 0.3901693  | -3.1739929 | -0.5972238 |
| C | -1.3042991 | -2.6202547 | 1.5172160  |
| C | 4.5659958  | 0.4179939  | 0.2636398  |
| N | 5.7026699  | 0.5477962  | 0.4444707  |
| C | -3.5273986 | -0.2704413 | -0.4730560 |
| H | -2.0876969 | 1.7377273  | -2.0392042 |
| H | -1.1650362 | -0.4900411 | -1.7792033 |
| H | 0.2592709  | -0.0188953 | 1.7668016  |
| H | 2.6670656  | 0.2673435  | 2.1394279  |
| H | 3.3526251  | 0.1946238  | -2.1131785 |
| H | 0.9239751  | -0.0929174 | -2.4884744 |
| H | -0.3276091 | 2.1759425  | 1.6023321  |
| H | -1.8324620 | 3.0325750  | 1.9178970  |
| H | -3.1737139 | 1.1253134  | 1.6179577  |
| H | -1.7336366 | 0.1928682  | 1.9888913  |
| H | 0.3753127  | -4.2360343 | -0.3421318 |
| H | 0.6040619  | -3.0578699 | -1.6615753 |

|   |            |            |            |
|---|------------|------------|------------|
| H | 1.1416903  | -2.6520005 | 0.0003049  |
| H | -1.2985126 | -3.6800184 | 1.7824104  |
| H | -2.2337838 | -2.1643060 | 1.8628975  |
| H | -0.4421910 | -2.1209555 | 1.9640077  |
| H | -3.5538565 | -0.6234625 | -1.5101195 |
| H | -3.6945820 | -1.1303863 | 0.1879721  |
| H | -4.3569682 | 0.4281515  | -0.3274713 |

lc\_sy\_c\_2.log

E = -1148.922955  
H = -1148.588371  
G = -1148.655814

NImag=0

|   |            |            |            |
|---|------------|------------|------------|
| C | 1.8388101  | 2.1306118  | 0.0529412  |
| C | 0.8140302  | 1.1429075  | 0.5504057  |
| C | 1.2647976  | 3.1756312  | -0.6541173 |
| O | 1.7707873  | 4.2556624  | -1.0887840 |
| C | 0.2861605  | 1.5711318  | 1.9770352  |
| C | -0.5556616 | 0.5717931  | 2.7309608  |
| C | -0.0163387 | -0.5756458 | 3.3304913  |
| C | -0.8364233 | -1.4902981 | 3.9759904  |
| C | -2.2183738 | -1.2634475 | 4.0191751  |
| C | -2.7733758 | -0.1224334 | 3.4319580  |
| C | -1.9363818 | 0.7900179  | 2.7987810  |
| C | -0.2338633 | 2.8646356  | -0.8313340 |
| C | -0.3645214 | 1.3911183  | -0.4271633 |
| S | 1.7356333  | 2.1457394  | 2.9989889  |
| C | 1.7240379  | 3.9337923  | 2.7150920  |
| C | 1.0918916  | 2.1557630  | 4.6898304  |
| C | -3.0745127 | -2.2112039 | 4.6812934  |
| N | -3.7637635 | -2.9743750 | 5.2140831  |
| C | 1.2970621  | -0.3059054 | 0.5267795  |
| H | 2.8833874  | 2.0972547  | 0.3582093  |
| H | -0.2949289 | 2.4918915  | 1.8550170  |
| H | 1.0534211  | -0.7660331 | 3.3018579  |
| H | -0.4154037 | -2.3752935 | 4.4412350  |
| H | -3.8437282 | 0.0486926  | 3.4776393  |
| H | -2.3614514 | 1.6831673  | 2.3493491  |
| H | -0.8171479 | 3.5284062  | -0.1762687 |
| H | -0.5585691 | 3.0630344  | -1.8581662 |
| H | -0.2084089 | 0.7495878  | -1.3019291 |
| H | -1.3377447 | 1.1288529  | 0.0055347  |
| H | 2.4587435  | 4.3640443  | 3.3989953  |
| H | 2.0044373  | 4.1128712  | 1.6772721  |
| H | 0.7238561  | 4.3164636  | 2.9297483  |
| H | 1.7807489  | 2.7708723  | 5.2727471  |
| H | 1.0916834  | 1.1381011  | 5.0781777  |
| H | 0.0878057  | 2.5851083  | 4.7021801  |
| H | 2.1178416  | -0.4743372 | 1.2353551  |
| H | 0.4981681  | -1.0207962 | 0.7511362  |
| H | 1.6780949  | -0.5254834 | -0.4751976 |

lc\_sy\_c\_2\_r.log

E = -1148.920616  
H = -1148.585903  
G = -1148.652602

NImag=0

|   |           |            |           |
|---|-----------|------------|-----------|
| C | 0.7123625 | -0.7070645 | 2.1392081 |
| C | 1.3324911 | -0.8065688 | 0.7692339 |
| C | 1.4912976 | -0.0068089 | 3.0466513 |



|   |            |            |            |
|---|------------|------------|------------|
| O | 1.2657959  | 0.3233519  | 4.2523055  |
| C | 0.5526498  | 0.1947413  | -0.1538883 |
| C | 0.6868372  | 1.6539725  | 0.2260040  |
| C | 1.8054374  | 2.4245187  | -0.1150476 |
| C | 1.9034919  | 3.7512312  | 0.2858105  |
| C | 0.8723728  | 4.3160775  | 1.0442079  |
| C | -0.2585721 | 3.5647998  | 1.3839123  |
| C | -0.3467806 | 2.2435141  | 0.9625654  |
| C | 2.8079475  | 0.3887739  | 2.3543750  |
| C | 2.8059947  | -0.3935476 | 1.0340590  |
| S | 0.9966416  | 0.0425974  | -1.9808520 |
| C | -0.0579534 | -1.3033467 | -2.5774336 |
| C | 0.0751340  | 1.4156249  | -2.7179030 |
| C | 0.9698916  | 5.6879693  | 1.4666105  |
| N | 1.0481799  | 6.7926740  | 1.8054549  |
| C | 1.2624623  | -2.2183337 | 0.1773154  |
| H | -0.3024926 | -1.0492378 | 2.3339252  |
| H | -0.5074538 | -0.0847555 | -0.1396725 |
| H | 2.6172175  | 2.0039679  | -0.7024899 |
| H | 2.7715004  | 4.3444228  | 0.0182586  |
| H | -1.0574774 | 4.0140497  | 1.9643220  |
| H | -1.2241058 | 1.6565652  | 1.2169529  |
| H | 2.8198505  | 1.4767301  | 2.2074038  |
| H | 3.6650691  | 0.1409067  | 2.9904376  |
| H | 3.3814589  | -1.3172786 | 1.1586831  |
| H | 3.2594286  | 0.1425412  | 0.1926534  |
| H | -0.1472608 | -1.1580857 | -3.6558115 |
| H | 0.4233555  | -2.2568232 | -2.3737707 |
| H | -1.0362616 | -1.2372238 | -2.0970877 |
| H | 0.0694349  | 1.2406592  | -3.7953961 |
| H | 0.5923500  | 2.3481668  | -2.4984838 |
| H | -0.9418571 | 1.4231609  | -2.3192740 |
| H | 0.2298518  | -2.5187926 | -0.0355250 |
| H | 1.8583746  | -2.3208690 | -0.7397919 |
| H | 1.6736469  | -2.9215139 | 0.9071394  |

lc\_sy\_c\_2\_ts1.log

E = -1148.898837

H = -1148.567259

G = -1148.635293

NImag=1

|   |            |            |            |
|---|------------|------------|------------|
| C | 2.7020068  | -0.7826992 | 1.0611490  |
| C | 1.4057117  | -1.2016382 | 0.7199553  |
| C | 3.6279062  | -1.1035167 | 0.0267698  |
| O | 4.8409340  | -0.8381919 | -0.0447149 |
| C | 0.4109362  | 0.4108088  | -0.4062713 |
| C | -1.0194801 | 0.2579040  | -0.3107215 |
| C | -1.8019639 | 0.7747257  | 0.7533938  |
| C | -3.1530996 | 0.4970437  | 0.8558293  |
| C | -3.7825193 | -0.3107385 | -0.1058562 |
| C | -3.0324551 | -0.8239483 | -1.1789289 |
| C | -1.6840824 | -0.5375302 | -1.2790547 |
| C | 2.8594036  | -1.8240058 | -1.0851832 |
| C | 1.5138152  | -2.1726000 | -0.4445495 |
| S | 1.0926398  | 1.8680255  | 0.3416826  |
| C | 2.6438453  | 2.0745624  | -0.5583701 |
| C | 0.1957111  | 3.2724951  | -0.3748177 |
| C | -5.1796904 | -0.5981567 | -0.0009678 |
| N | -6.3135029 | -0.8325778 | 0.0839484  |
| C | 0.3488585  | -1.4329397 | 1.7603471  |
| H | 2.9615398  | -0.2234035 | 1.9556958  |

|   |            |            |            |
|---|------------|------------|------------|
| H | 0.8330635  | 0.2738020  | -1.4018195 |
| H | -1.3441554 | 1.3875399  | 1.5264683  |
| H | -3.7302940 | 0.9002335  | 1.6823194  |
| H | -3.5182482 | -1.4365697 | -1.9323254 |
| H | -1.1168107 | -0.9273501 | -2.1196289 |
| H | 2.7337496  | -1.1162535 | -1.9165914 |
| H | 3.4189098  | -2.6841567 | -1.4626405 |
| H | 1.5375536  | -3.1871640 | -0.0237354 |
| H | 0.6583667  | -2.1227140 | -1.1240804 |
| H | 3.0095773  | 3.0756823  | -0.3219970 |
| H | 3.3556143  | 1.3266602  | -0.2134662 |
| H | 2.4450174  | 1.9764081  | -1.6278904 |
| H | 0.6922043  | 4.1844637  | -0.0356247 |
| H | -0.8297989 | 3.2509528  | -0.0049133 |
| H | 0.2183245  | 3.1916960  | -1.4631168 |
| H | 0.2120132  | -0.5604433 | 2.4082732  |
| H | -0.6144817 | -1.7014135 | 1.3197107  |
| H | 0.6752843  | -2.2683194 | 2.3922632  |

lc\_sy\_c\_2\_ts1\_rot2.log

E = -1148.899003

H = -1148.567242

G = -1148.633884

NImag=1

|   |            |            |            |
|---|------------|------------|------------|
| C | 0.4909261  | -2.4458573 | -0.7629758 |
| C | 1.2796460  | -1.7752439 | 0.1845480  |
| C | -0.8367987 | -2.6600283 | -0.2920212 |
| O | -1.7820949 | -3.2428813 | -0.8526127 |
| C | 1.3279388  | 0.2753174  | -0.4713982 |
| C | -0.0504103 | 0.7042809  | -0.3301271 |
| C | -0.5515326 | 1.3899762  | 0.8033181  |
| C | -1.9041505 | 1.6320310  | 0.9573385  |
| C | -2.8097729 | 1.1909539  | -0.0235115 |
| C | -2.3360886 | 0.5360910  | -1.1692259 |
| C | -0.9776172 | 0.3083438  | -1.3214459 |
| C | -0.9398509 | -2.0844792 | 1.1254815  |
| C | 0.5011142  | -1.7065850 | 1.4941274  |
| S | 2.4865314  | 1.3602846  | 0.3389485  |
| C | 4.0692165  | 0.9577165  | -0.4315535 |
| C | 2.2496288  | 2.9973198  | -0.4165249 |
| C | -4.2128877 | 1.4326308  | 0.1379299  |
| N | -5.3487199 | 1.6283155  | 0.2705764  |
| C | 2.7656384  | -2.0016313 | 0.2804871  |
| H | 0.8372569  | -2.7586473 | -1.7441372 |
| H | 1.6549556  | 0.1057973  | -1.4986360 |
| H | 0.1208867  | 1.7260219  | 1.5891670  |
| H | -2.2705006 | 2.1537867  | 1.8358465  |
| H | -3.0348509 | 0.2127585  | -1.9346535 |
| H | -0.6149254 | -0.1825515 | -2.2184415 |
| H | -1.6172237 | -1.2223539 | 1.1113590  |
| H | -1.3740645 | -2.8310649 | 1.7980390  |
| H | 0.9364310  | -2.4482744 | 2.1764311  |
| H | 0.5919199  | -0.7316934 | 1.9852545  |
| H | 4.7171494  | 1.8199353  | -0.2636887 |
| H | 4.4969350  | 0.0808584  | 0.0487660  |
| H | 3.9163057  | 0.7925728  | -1.5000125 |
| H | 3.0144710  | 3.6654130  | -0.0147289 |
| H | 1.2577392  | 3.3550515  | -0.1374029 |
| H | 2.3377470  | 2.8997662  | -1.5006220 |
| H | 3.2711551  | -1.8373065 | -0.6754649 |
| H | 3.2223607  | -1.3717647 | 1.0508735  |

H 2.9361068 -3.0449168 0.5762798

1c\_sy\_c\_2\_ts2.log

E = -1148.913310

H = -1148.580235

G = -1148.646798

NImag=1

|   |            |            |            |
|---|------------|------------|------------|
| C | -1.6013231 | 1.8809414  | -0.9277175 |
| C | -2.0350758 | 0.8704699  | 0.1068010  |
| C | -0.7297365 | 2.8451578  | -0.3973771 |
| O | -0.1214514 | 3.7771270  | -0.9791991 |
| C | -1.0992313 | -0.1898188 | -0.4076550 |
| C | 0.3876843  | -0.1489021 | -0.2289956 |
| C | 0.9945667  | -0.1995639 | 1.0333797  |
| C | 2.3787639  | -0.2304598 | 1.1542851  |
| C | 3.1706426  | -0.2167219 | 0.0011967  |
| C | 2.5819605  | -0.1838064 | -1.2696909 |
| C | 1.1980168  | -0.1603869 | -1.3735756 |
| C | -0.5993972 | 2.6112347  | 1.1148293  |
| C | -1.6577635 | 1.5477078  | 1.4436310  |
| S | -1.5276925 | -2.1698550 | 0.5098407  |
| C | -2.9070142 | -2.7577144 | -0.5028958 |
| C | -0.2102180 | -3.1495477 | -0.2505981 |
| C | 4.6035756  | -0.2472212 | 0.1225643  |
| N | 5.7574415  | -0.2721367 | 0.2202968  |
| C | -3.4964361 | 0.4449773  | 0.0582764  |
| H | -1.8837362 | 1.8089936  | -1.9737897 |
| H | -1.3819139 | -0.5226708 | -1.4096845 |
| H | 0.3922365  | -0.2359306 | 1.9348810  |
| H | 2.8440976  | -0.2708838 | 2.1334900  |
| H | 3.2040042  | -0.1810644 | -2.1585453 |
| H | 0.7335376  | -0.1399544 | -2.3554358 |
| H | 0.4242476  | 2.2891161  | 1.3414314  |
| H | -0.7655129 | 3.5504481  | 1.6523518  |
| H | -2.5655508 | 2.0411749  | 1.8067674  |
| H | -1.3597802 | 0.8305869  | 2.2150734  |
| H | -2.9188053 | -3.8486689 | -0.4549110 |
| H | -3.8361297 | -2.3666614 | -0.0901176 |
| H | -2.7797272 | -2.4290059 | -1.5375140 |
| H | -0.4519046 | -4.2063972 | -0.1202193 |
| H | 0.7277479  | -2.9238058 | 0.2584673  |
| H | -0.1339410 | -2.9058155 | -1.3137455 |
| H | -3.7443476 | -0.0315689 | -0.8966117 |
| H | -3.7425756 | -0.2493730 | 0.8718439  |
| H | -4.1297386 | 1.3302210  | 0.1723413  |

1c\_sy\_c\_3.log

E = -1148.915104

H = -1148.580177

G = -1148.646643

NImag=0

|   |            |            |            |
|---|------------|------------|------------|
| C | 1.4315546  | 1.5204157  | 0.4240442  |
| C | -0.0553497 | 1.7539857  | 0.5029960  |
| C | 2.0959636  | 2.4068265  | -0.4032103 |
| O | 3.3219419  | 2.4674701  | -0.7385167 |
| C | -0.6890561 | 1.9064420  | 1.9241577  |
| C | -1.0310886 | 0.6460445  | 2.6978576  |
| C | -0.1514825 | -0.4419025 | 2.7738294  |
| C | -0.4980751 | -1.5829066 | 3.4851061  |
| C | -1.7383039 | -1.6386985 | 4.1332409  |

|   |            |            |            |
|---|------------|------------|------------|
| C | -2.6267487 | -0.5607405 | 4.0717362  |
| C | -2.2647368 | 0.5741798  | 3.3547530  |
| C | 1.0880868  | 3.4282261  | -0.9537736 |
| C | -0.2558642 | 3.0906623  | -0.2936716 |
| S | 0.2028979  | 2.9688942  | 3.1820384  |
| C | 1.6570320  | 2.0471075  | 3.7234934  |
| C | 0.9984266  | 4.3629306  | 2.3534802  |
| C | -2.1035943 | -2.8207684 | 4.8684710  |
| N | -2.3978227 | -3.7718826 | 5.4599152  |
| C | -0.8699703 | 0.6426102  | -0.1981880 |
| H | 1.9168450  | 0.6503817  | 0.8591703  |
| H | -1.6183335 | 2.4795492  | 1.8158703  |
| H | 0.8092314  | -0.4052029 | 2.2715619  |
| H | 0.1822470  | -2.4262199 | 3.5384284  |
| H | -3.5859441 | -0.6141684 | 4.5755954  |
| H | -2.9532059 | 1.4131506  | 3.3002300  |
| H | 1.4262401  | 4.4493064  | -0.7329782 |
| H | 1.0534582  | 3.3367833  | -2.0461871 |
| H | -1.0569231 | 2.9595500  | -1.0280949 |
| H | -0.5857697 | 3.8966423  | 0.3661715  |
| H | 2.2120020  | 2.7356529  | 4.3648487  |
| H | 1.3226266  | 1.1937541  | 4.3131853  |
| H | 2.2490050  | 1.7446102  | 2.8602078  |
| H | 1.5715246  | 4.8638811  | 3.1373771  |
| H | 0.2253726  | 5.0364551  | 1.9846110  |
| H | 1.6526629  | 4.0030763  | 1.5603316  |
| H | -0.6203491 | -0.3524038 | 0.1810131  |
| H | -1.9531155 | 0.7930732  | -0.0892808 |
| H | -0.6277851 | 0.6660321  | -1.2656202 |

1c\_sy\_c\_3\_r.log

E = -1148.910035

H = -1148.575025

G = -1148.641647

NImag=0

|   |            |            |            |
|---|------------|------------|------------|
| C | 0.9000976  | -1.8209347 | 0.4645413  |
| C | 1.4381115  | -0.9609061 | -0.6503773 |
| C | 1.7413913  | -1.9305574 | 1.5552351  |
| O | 1.6035883  | -2.5641906 | 2.6495366  |
| C | 0.4111876  | 0.1920543  | -0.8994625 |
| C | -0.2326730 | 0.8717948  | 0.2914120  |
| C | 0.4874630  | 1.2118947  | 1.4452319  |
| C | -0.1339182 | 1.8683984  | 2.4969522  |
| C | -1.4937999 | 2.1970153  | 2.3984672  |
| C | -2.2259146 | 1.8694681  | 1.2549968  |
| C | -1.5874307 | 1.2081261  | 0.2094631  |
| C | 3.0216915  | -1.1300741 | 1.2753058  |
| C | 2.8455646  | -0.5207723 | -0.1268021 |
| S | 0.8842451  | 1.6532488  | -2.0362472 |
| C | 1.5732535  | 2.9436341  | -0.9760966 |
| C | 2.3402071  | 1.2448999  | -3.0274645 |
| C | -2.1403076 | 2.8809078  | 3.4867133  |
| N | -2.6593822 | 3.4331549  | 4.3624678  |
| C | 1.5503473  | -1.7821201 | -1.9487169 |
| H | -0.0740958 | -2.3006971 | 0.3903771  |
| H | -0.3962357 | -0.2325120 | -1.5062186 |
| H | 1.5405502  | 0.9705061  | 1.5291123  |
| H | 0.4240204  | 2.1284595  | 3.3903613  |
| H | -3.2778864 | 2.1255971  | 1.1870703  |
| H | -2.1553547 | 0.9455374  | -0.6793390 |
| H | 3.1599483  | -0.3703396 | 2.0561278  |

|   |           |            |            |
|---|-----------|------------|------------|
| H | 3.8894947 | -1.7973390 | 1.3340815  |
| H | 3.6115147 | -0.8898413 | -0.8169026 |
| H | 2.9571872 | 0.5671296  | -0.1038042 |
| H | 1.9432550 | 3.7111021  | -1.6591978 |
| H | 0.7656511 | 3.3536669  | -0.3698464 |
| H | 2.3831730 | 2.5609444  | -0.3551303 |
| H | 2.6813964 | 2.1996620  | -3.4342871 |
| H | 2.0264173 | 0.5978898  | -3.8452602 |
| H | 3.1203126 | 0.7861887  | -2.4206586 |
| H | 0.5727992 | -2.1957612 | -2.2222855 |
| H | 1.9328498 | -1.2214608 | -2.8060836 |
| H | 2.2317460 | -2.6199646 | -1.7729325 |

lc\_sy\_c\_3\_ts1.log

E = -1148.889646  
H = -1148.557444  
G = -1148.623554

NImag=1

|   |            |            |            |
|---|------------|------------|------------|
| C | 1.5747659  | -1.6365646 | 0.6638236  |
| C | 1.2531990  | -1.3234196 | -0.6635955 |
| C | 2.9506671  | -1.3991673 | 0.9377729  |
| O | 3.5596489  | -1.4950798 | 2.0174604  |
| C | 0.2964891  | 0.6523346  | -0.7828058 |
| C | -1.1046570 | 0.4608235  | -0.4398336 |
| C | -1.5303477 | 0.3916762  | 0.9060073  |
| C | -2.8511814 | 0.1214245  | 1.2321676  |
| C | -3.7897706 | -0.0969230 | 0.2143392  |
| C | -3.3904994 | -0.0329049 | -1.1330949 |
| C | -2.0730251 | 0.2443832  | -1.4475026 |
| C | 3.6376302  | -0.9702721 | -0.3640668 |
| C | 2.5507779  | -1.0943277 | -1.4368111 |
| S | 0.9775914  | 2.0185953  | 0.1406387  |
| C | 2.0117200  | 1.4835040  | 1.5396058  |
| C | 2.2623518  | 2.6581860  | -0.9492842 |
| C | -5.1542703 | -0.3798177 | 0.5454747  |
| N | -6.2599327 | -0.6092799 | 0.8121921  |
| C | 0.1493601  | -2.0326976 | -1.3982878 |
| H | 0.8619310  | -1.9759432 | 1.4101417  |
| H | 0.4919473  | 0.8596721  | -1.8351954 |
| H | -0.8169317 | 0.5344110  | 1.7143175  |
| H | -3.1589063 | 0.0699085  | 2.2719081  |
| H | -4.1217013 | -0.1896657 | -1.9200651 |
| H | -1.7726575 | 0.3024176  | -2.4899280 |
| H | 4.0260870  | 0.0504636  | -0.2611394 |
| H | 4.5014243  | -1.6154437 | -0.5529570 |
| H | 2.7198037  | -1.9829446 | -2.0582371 |
| H | 2.4943500  | -0.2399518 | -2.1162998 |
| H | 2.1785890  | 2.3961137  | 2.1161786  |
| H | 1.4580236  | 0.7606782  | 2.1389182  |
| H | 2.9597877  | 1.0705204  | 1.2023340  |
| H | 2.7864381  | 3.4444271  | -0.4028576 |
| H | 1.7747613  | 3.0767948  | -1.8304575 |
| H | 2.9502606  | 1.8564078  | -1.2214761 |
| H | -0.7508869 | -2.1449623 | -0.7883782 |
| H | -0.1144205 | -1.5356081 | -2.3370010 |
| H | 0.5161563  | -3.0373727 | -1.6443017 |

lc\_sy\_c\_4\_ts1.log

E = -1148.894568  
H = -1148.562896

G = -1148.631059  
NImag=1

|   |            |            |            |
|---|------------|------------|------------|
| C | -1.8659563 | -1.3123399 | -0.9061477 |
| C | -1.3843108 | -1.3144192 | 0.4123934  |
| C | -3.2817681 | -1.1561594 | -0.9592443 |
| O | -4.0235561 | -1.0859248 | -1.9540835 |
| C | -0.2919386 | 0.5881083  | 0.7562856  |
| C | 1.0972347  | 0.3652855  | 0.4148733  |
| C | 2.0298576  | 0.0885045  | 1.4442771  |
| C | 3.3411330  | -0.2447045 | 1.1619619  |
| C | 3.7772825  | -0.3052178 | -0.1739390 |
| C | 2.8764706  | -0.0231425 | -1.2122870 |
| C | 1.5631959  | 0.3075372  | -0.9218212 |
| C | -3.8219449 | -1.1927773 | 0.4757446  |
| C | -2.5748034 | -1.2209584 | 1.3736528  |
| S | -1.0896821 | 1.7188664  | -0.3410256 |
| C | -2.6439185 | 2.0775857  | 0.4879065  |
| C | -0.2530098 | 3.3055008  | -0.0845662 |
| C | 5.1356058  | -0.6423964 | -0.4730063 |
| N | 6.2372702  | -0.9165198 | -0.7143731 |
| C | -0.2407664 | -2.1896527 | 0.8441055  |
| H | -1.2468574 | -1.4522372 | -1.7878600 |
| H | -0.4827953 | 0.8579646  | 1.7963853  |
| H | 1.7007874  | 0.1358356  | 2.4786729  |
| H | 4.0391632  | -0.4520909 | 1.9672290  |
| H | 3.2113582  | -0.0678795 | -2.2439964 |
| H | 0.8865966  | 0.5068865  | -1.7490499 |
| H | -4.5039699 | -0.3583192 | 0.6678584  |
| H | -4.4129692 | -2.1093786 | 0.5822033  |
| H | -2.5661011 | -2.0976959 | 2.0309388  |
| H | -2.5053643 | -0.3432544 | 2.0227711  |
| H | -3.0518766 | 2.9750416  | 0.0192508  |
| H | -3.3250406 | 1.2458060  | 0.3254748  |
| H | -2.4602399 | 2.2441785  | 1.5513205  |
| H | -0.7669663 | 4.0582389  | -0.6863125 |
| H | 0.7762311  | 3.1934532  | -0.4302135 |
| H | -0.2806082 | 3.5611866  | 0.9762328  |
| H | 0.5843528  | -2.1842059 | 0.1266499  |
| H | 0.1430454  | -1.9128618 | 1.8310454  |
| H | -0.6247022 | -3.2161550 | 0.9095873  |

lc\_sy\_c\_4\_ts2.log  
E = -1148.909111  
H = -1148.575939  
G = -1148.642648  
NImag=1

|   |            |            |            |
|---|------------|------------|------------|
| C | -1.1530508 | 2.0741009  | -0.8902502 |
| C | -1.8249131 | 1.0128455  | -0.0557922 |
| C | -0.2444268 | 2.8454660  | -0.1481540 |
| O | 0.5270439  | 3.7577236  | -0.5335734 |
| C | -0.9797336 | -0.0937050 | -0.6366504 |
| C | 0.4934748  | -0.2416151 | -0.3852837 |
| C | 1.0227868  | -0.4810418 | 0.8897278  |
| C | 2.3894242  | -0.6622374 | 1.0693160  |
| C | 3.2415223  | -0.6154573 | -0.0389063 |
| C | 2.7280991  | -0.3984522 | -1.3244306 |
| C | 1.3613614  | -0.2231914 | -1.4870053 |
| C | -0.3210382 | 2.4147861  | 1.3225944  |
| C | -1.5148648 | 1.4497146  | 1.3959351  |
| S | -1.5827281 | -2.1654779 | -0.1004282 |
| C | -2.2258806 | -2.1104411 | 1.5871232  |

|   |            |            |            |
|---|------------|------------|------------|
| C | -3.1024610 | -2.4662703 | -1.0325625 |
| C | 4.6559201  | -0.8026570 | 0.1409022  |
| N | 5.7953012  | -0.9538182 | 0.2851409  |
| C | -3.3144782 | 0.8312395  | -0.3226815 |
| H | -1.3222777 | 2.1731720  | -1.9583138 |
| H | -1.2250762 | -0.2557112 | -1.6885670 |
| H | 0.3726976  | -0.5330725 | 1.7566602  |
| H | 2.7936206  | -0.8434175 | 2.0597790  |
| H | 3.3946253  | -0.3710720 | -2.1800989 |
| H | 0.9575576  | -0.0547094 | -2.4811673 |
| H | 0.6290182  | 1.9490112  | 1.6109463  |
| H | -0.4515996 | 3.2952351  | 1.9601547  |
| H | -2.3987414 | 1.9877476  | 1.7549558  |
| H | -1.3639782 | 0.6029712  | 2.0723615  |
| H | -2.7303161 | -3.0591966 | 1.7845890  |
| H | -1.3811368 | -2.0033559 | 2.2693256  |
| H | -2.9226862 | -1.2806226 | 1.7109374  |
| H | -3.3692727 | -3.5188224 | -0.9168908 |
| H | -2.8939760 | -2.2581969 | -2.0841661 |
| H | -3.9122030 | -1.8313046 | -0.6738781 |
| H | -3.4967364 | 0.4947314  | -1.3495248 |
| H | -3.7772305 | 0.1168003  | 0.3664890  |
| H | -3.8153850 | 1.7950005  | -0.1863651 |

lc\_sy\_c\_5.log

E = -1148.916494

H = -1148.581659

G = -1148.647842

NImag=0

|   |            |            |            |
|---|------------|------------|------------|
| C | 1.6363932  | 2.4614638  | 0.1832845  |
| C | 0.8288928  | 1.3058920  | 0.7201168  |
| C | 0.8927663  | 3.3117277  | -0.6195572 |
| O | 1.1973738  | 4.4225471  | -1.1558775 |
| C | 0.1515411  | 1.6505483  | 2.1042666  |
| C | -0.6560457 | 0.5541141  | 2.7685938  |
| C | -0.0531004 | -0.5200392 | 3.4365143  |
| C | -0.8247970 | -1.5128315 | 4.0256420  |
| C | -2.2206832 | -1.4363969 | 3.9434110  |
| C | -2.8399857 | -0.3697976 | 3.2834568  |
| C | -2.0526487 | 0.6202536  | 2.7071825  |
| C | -0.5113071 | 2.7014444  | -0.7877036 |
| C | -0.3452711 | 1.2599145  | -0.3019246 |
| S | 1.2069559  | 2.4018605  | 3.4405863  |
| C | 2.9037322  | 1.8026859  | 3.3182739  |
| C | 1.3934638  | 4.1327915  | 2.9637732  |
| C | -3.0259141 | -2.4630524 | 4.5493912  |
| N | -3.6741212 | -3.2896084 | 5.0372706  |
| C | 1.5626564  | -0.0378313 | 0.7553731  |
| H | 2.6560980  | 2.6734919  | 0.4923644  |
| H | -0.5209614 | 2.4973141  | 1.9197445  |
| H | 1.0287609  | -0.5984500 | 3.4977314  |
| H | -0.3543094 | -2.3421544 | 4.5431069  |
| H | -3.9222624 | -0.3154328 | 3.2306472  |
| H | -2.5291059 | 1.4568886  | 2.2032189  |
| H | -1.2306669 | 3.2655737  | -0.1757646 |
| H | -0.8492001 | 2.7714266  | -1.8269694 |
| H | -0.0185317 | 0.6257020  | -1.1340279 |
| H | -1.2570374 | 0.8134620  | 0.1106544  |
| H | 3.4693935  | 2.4061681  | 4.0322837  |
| H | 2.9232579  | 0.7591155  | 3.6327681  |
| H | 3.2959274  | 1.9295604  | 2.3111427  |

|   |           |            |            |
|---|-----------|------------|------------|
| H | 1.9215003 | 4.6193661  | 3.7868592  |
| H | 0.3890820 | 4.5501409  | 2.8710255  |
| H | 1.9391023 | 4.2102376  | 2.0251901  |
| H | 2.3567469 | -0.0734539 | 1.5077850  |
| H | 0.8787194 | -0.8725024 | 0.9452000  |
| H | 2.0264853 | -0.2001403 | -0.2223335 |

lc\_sy\_c\_5\_r.log

E = -1148.915963

H = -1148.581153

G = -1148.647960

NImag=0

|   |            |            |            |
|---|------------|------------|------------|
| C | 0.9112473  | 0.0600323  | 2.1235955  |
| C | 1.4002876  | -0.5071108 | 0.8149380  |
| C | 1.7715133  | 0.9892211  | 2.6851688  |
| O | 1.6603389  | 1.6931203  | 3.7368744  |
| C | 0.5127802  | 0.1449887  | -0.3016055 |
| C | 0.5690941  | 1.6589937  | -0.3831608 |
| C | 1.5987527  | 2.3387228  | -1.0433241 |
| C | 1.6290733  | 3.7286605  | -1.0747192 |
| C | 0.6159876  | 4.4506217  | -0.4364142 |
| C | -0.4296586 | 3.7876547  | 0.2180001  |
| C | -0.4485524 | 2.3991167  | 0.2313998  |
| C | 3.0153161  | 1.1014533  | 1.7895204  |
| C | 2.8884086  | -0.0527518 | 0.7851633  |
| S | 0.6327103  | -0.4544531 | -2.0876006 |
| C | 2.3182171  | -0.9899763 | -2.4560607 |
| C | -0.2617444 | -2.0225852 | -2.1315747 |
| C | 0.6427093  | 5.8887585  | -0.4616482 |
| N | 0.6637368  | 7.0466026  | -0.4821156 |
| C | 1.2581381  | -2.0341015 | 0.7687861  |
| H | -0.0780543 | -0.1763701 | 2.5114062  |
| H | -0.5236112 | -0.1494425 | -0.0941093 |
| H | 2.4017294  | 1.7993335  | -1.5372134 |
| H | 2.4316521  | 4.2496764  | -1.5857746 |
| H | -1.2163381 | 4.3556312  | 0.7032955  |
| H | -1.2590465 | 1.8794864  | 0.7332729  |
| H | 3.0164332  | 2.0859514  | 1.3028129  |
| H | 3.9286555  | 1.0399871  | 2.3918269  |
| H | 3.4941556  | -0.9027726 | 1.1191581  |
| H | 3.2455135  | 0.2093283  | -0.2151953 |
| H | 2.2509720  | -1.5068211 | -3.4164354 |
| H | 2.9468010  | -0.1056641 | -2.5649480 |
| H | 2.7042775  | -1.6588389 | -1.6881485 |
| H | -0.3936405 | -2.2650111 | -3.1879075 |
| H | -1.2359030 | -1.8585738 | -1.6676710 |
| H | 0.2922998  | -2.8082584 | -1.6216778 |
| H | 0.2028901  | -2.3326619 | 0.7782316  |
| H | 1.7405562  | -2.4973022 | -0.0984166 |
| H | 1.7325001  | -2.4510306 | 1.6619436  |

lc\_sy\_c\_5\_ts1.log

E = -1148.894166

H = -1148.562279

G = -1148.629198

NImag=1

|   |           |            |            |
|---|-----------|------------|------------|
| C | 2.8326082 | -0.5207285 | 0.9167136  |
| C | 1.4640554 | -0.8259304 | 1.0054134  |
| C | 3.4808471 | -1.3358720 | -0.0567657 |
| O | 4.6660217 | -1.3092458 | -0.4314358 |



|   |            |            |            |
|---|------------|------------|------------|
| C | 0.3770611  | 0.3593536  | -0.4744244 |
| C | -1.0636452 | 0.2017872  | -0.3914386 |
| C | -1.8738091 | 1.0277235  | 0.4249233  |
| C | -3.2359446 | 0.8118166  | 0.5455622  |
| C | -3.8398775 | -0.2551044 | -0.1382688 |
| C | -3.0585135 | -1.0919826 | -0.9530808 |
| C | -1.7002675 | -0.8604991 | -1.0779796 |
| C | 2.4399473  | -2.3016602 | -0.6305878 |
| C | 1.2489521  | -2.1688729 | 0.3208258  |
| S | 0.8806927  | 2.0690803  | -0.5687434 |
| C | 1.4850154  | 2.6404445  | 1.0410119  |
| C | 2.4334266  | 1.9544270  | -1.4778915 |
| C | -5.2467019 | -0.4859818 | -0.0097162 |
| N | -6.3873143 | -0.6733072 | 0.0938248  |
| C | 0.6268281  | -0.5198045 | 2.2152643  |
| H | 3.3447294  | 0.2629296  | 1.4646953  |
| H | 0.8389370  | -0.1391292 | -1.3261762 |
| H | -1.4307793 | 1.8433858  | 0.9918073  |
| H | -3.8380929 | 1.4593111  | 1.1754097  |
| H | -3.5267912 | -1.9080245 | -1.4947333 |
| H | -1.1109858 | -1.4945546 | -1.7346601 |
| H | 2.1852271  | -1.9715465 | -1.6470433 |
| H | 2.8445799  | -3.3147860 | -0.7054887 |
| H | 1.2952583  | -2.9379077 | 1.1037793  |
| H | 0.2709659  | -2.2587273 | -0.1574261 |
| H | 1.8797449  | 3.6445631  | 0.8694750  |
| H | 0.6318957  | 2.6985554  | 1.7179233  |
| H | 2.2574470  | 1.9814844  | 1.4298309  |
| H | 2.8736511  | 2.9529900  | -1.4999388 |
| H | 2.1939926  | 1.6280092  | -2.4911512 |
| H | 3.0928523  | 1.2417951  | -0.9799314 |
| H | 0.7532853  | 0.5083870  | 2.5631797  |
| H | -0.4350998 | -0.7046671 | 2.0312541  |
| H | 0.9456545  | -1.1874799 | 3.0264067  |

lc\_sy\_c\_6.log

E = -1148.921623

H = -1148.586977

G = -1148.653379

NImag=0

|   |            |            |            |
|---|------------|------------|------------|
| C | 1.0489909  | 0.9305622  | 0.1528182  |
| C | -0.1935683 | 1.7432156  | 0.3946836  |
| C | 2.1150918  | 1.6780703  | -0.3209811 |
| O | 3.3045784  | 1.3407951  | -0.6139196 |
| C | -0.5290955 | 2.0052050  | 1.9119105  |
| C | -0.8839069 | 0.7541935  | 2.6790201  |
| C | 0.0637340  | -0.2347329 | 2.9762490  |
| C | -0.3117128 | -1.3924718 | 3.6458420  |
| C | -1.6491441 | -1.5671288 | 4.0216957  |
| C | -2.6049866 | -0.5850567 | 3.7392752  |
| C | -2.2129765 | 0.5715965  | 3.0756150  |
| C | 1.6576277  | 3.1429537  | -0.4586016 |
| C | 0.1291717  | 3.0751436  | -0.3428777 |
| S | 0.8822920  | 2.8455752  | 2.7915872  |
| C | 0.5357272  | 4.6104100  | 2.5808737  |
| C | 0.3909706  | 2.7090637  | 4.5284420  |
| C | -2.0426507 | -2.7649359 | 4.7150692  |
| N | -2.3600752 | -3.7289514 | 5.2729817  |
| C | -1.4698932 | 1.1094908  | -0.1853327 |
| H | 1.0972296  | -0.1376507 | 0.3470783  |
| H | -1.3566995 | 2.7200730  | 1.9942033  |

|   |            |            |            |
|---|------------|------------|------------|
| H | 1.1032902  | -0.1021297 | 2.6927743  |
| H | 0.4227963  | -2.1559733 | 3.8795326  |
| H | -3.6374693 | -0.7262033 | 4.0408840  |
| H | -2.9492725 | 1.3395850  | 2.8564555  |
| H | 2.1381980  | 3.7445494  | 0.3264551  |
| H | 1.9893547  | 3.5624633  | -1.4143801 |
| H | -0.2947013 | 2.9981109  | -1.3495878 |
| H | -0.3448854 | 3.9455844  | 0.1246404  |
| H | 1.1202729  | 5.1249663  | 3.3463563  |
| H | 0.8695198  | 4.9290928  | 1.5956380  |
| H | -0.5314686 | 4.7907119  | 2.7230083  |
| H | 1.0471381  | 3.3816193  | 5.0843109  |
| H | 0.5499713  | 1.6829423  | 4.8580097  |
| H | -0.6543770 | 3.0043814  | 4.6397965  |
| H | -1.6527545 | 0.1139923  | 0.2321316  |
| H | -2.3572105 | 1.7284809  | 0.0035887  |
| H | -1.3491069 | 1.0027061  | -1.2673461 |

lc\_sy\_c\_6\_ts1.log

E = -1148.897410

H = -1148.565715

G = -1148.633398

NImag=1

|   |            |            |            |
|---|------------|------------|------------|
| C | -1.2461312 | -1.8119074 | -0.4180235 |
| C | -1.2949255 | -1.2742021 | 0.8750905  |
| C | -2.5031488 | -1.6919248 | -1.0824339 |
| O | -2.8171538 | -2.0425581 | -2.2319134 |
| C | -0.4641590 | 0.7622053  | 0.8045371  |
| C | 0.9119511  | 0.5123992  | 0.4374508  |
| C | 1.3046995  | 0.1678857  | -0.8783654 |
| C | 2.6143265  | -0.1823852 | -1.1692725 |
| C | 3.5801539  | -0.1936002 | -0.1531699 |
| C | 3.2166791  | 0.1551709  | 1.1607881  |
| C | 1.9095204  | 0.5029572  | 1.4430791  |
| C | -3.5028647 | -1.0579394 | -0.1052225 |
| C | -2.7571252 | -1.0262464 | 1.2354653  |
| S | -1.4046640 | 1.5994617  | -0.4455589 |
| C | -2.6902356 | 2.4282580  | 0.5119306  |
| C | -0.4501746 | 3.0710180  | -0.9162058 |
| C | 4.9347316  | -0.5452245 | -0.4543429 |
| N | 6.0332706  | -0.8309710 | -0.6960190 |
| C | -0.3860238 | -1.7483674 | 1.9744564  |
| H | -0.3651866 | -2.2512628 | -0.8751590 |
| H | -0.6132490 | 1.2455062  | 1.7714998  |
| H | 0.5785950  | 0.1683804  | -1.6871560 |
| H | 2.8952851  | -0.4462380 | -2.1842524 |
| H | 3.9666577  | 0.1570680  | 1.9458268  |
| H | 1.6352023  | 0.7734734  | 2.4590516  |
| H | -3.7865528 | -0.0648080 | -0.4748567 |
| H | -4.4199635 | -1.6536851 | -0.0725878 |
| H | -3.0787823 | -1.8672688 | 1.8636645  |
| H | -2.9035226 | -0.1213850 | 1.8313175  |
| H | -3.2186512 | 3.0904906  | -0.1761927 |
| H | -3.3791913 | 1.6850403  | 0.9087862  |
| H | -2.2215735 | 2.9972846  | 1.3169918  |
| H | -1.0813978 | 3.6742020  | -1.5723745 |
| H | 0.4370166  | 2.7408886  | -1.4580068 |
| H | -0.1751620 | 3.6215140  | -0.0146083 |
| H | 0.6386536  | -1.8957656 | 1.6230136  |
| H | -0.3745711 | -1.0623057 | 2.8275355  |
| H | -0.7605212 | -2.7180223 | 2.3270805  |

lc\_sy\_c\_prod\_1.log

E = -671.038738

H = -670.787963

G = -670.843261

NImag=0

|   |           |            |            |
|---|-----------|------------|------------|
| C | 1.6936520 | 1.8414329  | 0.0037070  |
| C | 2.2435918 | 0.5831733  | 0.5777069  |
| C | 2.3281145 | 0.7775098  | 2.0878848  |
| C | 1.8020819 | 2.1793797  | 2.4106225  |
| C | 1.6712078 | 2.9251208  | 1.0733858  |
| O | 1.2714755 | 1.9713156  | -1.1304201 |
| C | 3.5869137 | 0.6995688  | 1.2901389  |
| C | 4.5303906 | 1.8412971  | 1.0793786  |
| C | 4.8780511 | 2.2572341  | -0.2117983 |
| C | 5.7706970 | 3.3041238  | -0.4052955 |
| C | 6.3249538 | 3.9453353  | 0.7100418  |
| C | 5.9960375 | 3.5359285  | 2.0083344  |
| C | 5.1025181 | 2.4853684  | 2.1830485  |
| H | 4.0900583 | -0.2643509 | 1.3587606  |
| H | 1.9857918 | -0.3604695 | 0.1091018  |
| C | 1.9826741 | -0.3334482 | 3.0459832  |
| C | 7.2438947 | 5.0350132  | 0.5186711  |
| N | 7.9840512 | 5.9127276  | 0.3641449  |
| H | 0.8162682 | 2.0698018  | 2.8740989  |
| H | 2.4472255 | 2.6995317  | 3.1258877  |
| H | 2.5037222 | 3.6137129  | 0.8854419  |
| H | 0.7459988 | 3.4998884  | 0.9867487  |
| H | 4.4403719 | 1.7589467  | -1.0726951 |
| H | 6.0375351 | 3.6285095  | -1.4059582 |
| H | 6.4355390 | 4.0384606  | 2.8638422  |
| H | 4.8430029 | 2.1610140  | 3.1869292  |
| H | 2.3724785 | -1.2928635 | 2.6930170  |
| H | 2.4142657 | -0.1326754 | 4.0332277  |
| H | 0.8971367 | -0.4203871 | 3.1611629  |

lc\_sy\_tr\_1.log

E = -1148.923894

H = -1148.589048

G = -1148.656063

NImag=0

|   |            |            |            |
|---|------------|------------|------------|
| C | -4.0354345 | 2.8916809  | 1.0467227  |
| C | -2.9572919 | 2.2839033  | 1.9105991  |
| C | -3.5634581 | 3.2766930  | -0.2005342 |
| O | -4.1242841 | 3.9224761  | -1.1379580 |
| C | -3.5125815 | 1.1178774  | 2.7738214  |
| C | -2.5149628 | 0.3940183  | 3.6471828  |
| C | -2.6452575 | 0.5121645  | 5.0353663  |
| C | -1.7287340 | -0.0861031 | 5.8923708  |
| C | -0.6715773 | -0.8244816 | 5.3506553  |
| C | -0.5335512 | -0.9650949 | 3.9642932  |
| C | -1.4525785 | -0.3537153 | 3.1211073  |
| C | -2.0969362 | 2.8272016  | -0.3135918 |
| C | -1.8956263 | 1.8601692  | 0.8590133  |
| S | -4.4139601 | -0.0766309 | 1.6592659  |
| C | -4.5588736 | -1.5521426 | 2.6987048  |
| C | -6.1367992 | 0.4635536  | 1.7510880  |
| C | 0.2798998  | -1.4538098 | 6.2277534  |
| N | 1.0453150  | -1.9606461 | 6.9337210  |
| C | -2.3507973 | 3.2976486  | 2.9024848  |

|   |            |            |            |
|---|------------|------------|------------|
| H | -4.9819609 | 3.2300246  | 1.4653450  |
| H | -4.3089560 | 1.5155078  | 3.4137698  |
| H | -3.4706499 | 1.0841146  | 5.4493675  |
| H | -1.8307021 | 0.0120672  | 6.9680075  |
| H | 0.2855041  | -1.5474286 | 3.5556473  |
| H | -1.3375724 | -0.4800957 | 2.0493625  |
| H | -1.8898435 | 2.3700396  | -1.2872659 |
| H | -1.4551973 | 3.7150334  | -0.2293444 |
| H | -0.8810059 | 1.8700320  | 1.2720364  |
| H | -2.0986535 | 0.8432209  | 0.5042749  |
| H | -5.2737693 | -2.2085287 | 2.1987118  |
| H | -3.5872519 | -2.0422890 | 2.7529096  |
| H | -4.9177542 | -1.2758179 | 3.6924548  |
| H | -6.7399754 | -0.3605716 | 1.3638497  |
| H | -6.2440970 | 1.3446355  | 1.1225269  |
| H | -6.3943211 | 0.6763886  | 2.7904871  |
| H | -1.5374755 | 2.8677531  | 3.4999869  |
| H | -1.9483357 | 4.1472465  | 2.3409516  |
| H | -3.1184933 | 3.6788053  | 3.5864548  |

lc\_sy\_tr\_1\_r.log

E = -1148.921621  
H = -1148.586761  
G = -1148.654206

NImag=0

|   |            |            |            |
|---|------------|------------|------------|
| C | 1.4177504  | -1.2479294 | -0.9055370 |
| C | 1.4389255  | -0.7208568 | 0.5130660  |
| C | 1.3207411  | -2.6298215 | -0.9678989 |
| O | 1.3821111  | -3.4200002 | -1.9600026 |
| C | 0.4856644  | 0.5098986  | 0.5884286  |
| C | 0.7600719  | 1.5969327  | -0.4301450 |
| C | -0.1299352 | 1.7400085  | -1.5005171 |
| C | 0.0840181  | 2.7020016  | -2.4798999 |
| C | 1.1983828  | 3.5428721  | -2.3793371 |
| C | 2.0887620  | 3.4247423  | -1.3064387 |
| C | 1.8650647  | 2.4531582  | -0.3377609 |
| C | 1.1727803  | -3.1665566 | 0.4633546  |
| C | 0.8692753  | -1.9296180 | 1.3158953  |
| S | 0.4844878  | 1.3835254  | 2.2383518  |
| C | -0.8745995 | 2.5484750  | 2.0003004  |
| C | -0.3041552 | 0.2361260  | 3.3845510  |
| C | 1.4255698  | 4.5473466  | -3.3842301 |
| N | 1.6080315  | 5.3561498  | -4.1927429 |
| C | 2.8613046  | -0.3889838 | 0.9974796  |
| H | 1.6736639  | -0.6233547 | -1.7581150 |
| H | -0.5457422 | 0.1603046  | 0.4702031  |
| H | -0.9951293 | 1.0871213  | -1.5687347 |
| H | -0.6046198 | 2.8065932  | -3.3116948 |
| H | 2.9440908  | 4.0879576  | -1.2328906 |
| H | 2.5605490  | 2.3794538  | 0.4930851  |
| H | 0.3906776  | -3.9308954 | 0.5264796  |
| H | 2.1170786  | -3.6465564 | 0.7544649  |
| H | 1.3007910  | -1.9914390 | 2.3204456  |
| H | -0.2161823 | -1.8227594 | 1.4220527  |
| H | -1.0954305 | 2.9802508  | 2.9782360  |
| H | -0.5398850 | 3.3290886  | 1.3165557  |
| H | -1.7422987 | 2.0175021  | 1.6027070  |
| H | -0.5961802 | 0.8335453  | 4.2510941  |
| H | 0.4262507  | -0.5127285 | 3.6869448  |
| H | -1.1781436 | -0.2175276 | 2.9143843  |
| H | 2.8886871  | 0.0328614  | 2.0125766  |

|   |           |            |           |
|---|-----------|------------|-----------|
| H | 3.4442085 | -1.3159289 | 1.0141916 |
| H | 3.3688862 | 0.3031573  | 0.3193024 |

```
lc_sy_tr_1_ts1.log
E = -1148.897964
H = -1148.565952
G = -1148.633780
```

```
NImag=1
C 2.8346526 -1.0399998 0.4001838
C 1.5777417 -1.0941355 1.0344458
C 2.7840663 -1.6165800 -0.9021598
O 3.6923674 -1.7395765 -1.7420430
C 0.4902460 0.7796770 0.7371030
C -0.8940456 0.5423352 0.3966945
C -1.8338754 0.4001649 1.4479000
C -3.1512900 0.0611597 1.2002217
C -3.5891361 -0.1357068 -0.1209628
C -2.6819547 0.0173468 -1.1822024
C -1.3632358 0.3483296 -0.9260351
C 1.3499991 -2.1045597 -1.1406142
C 0.7164943 -2.0770163 0.2528743
S 1.4770395 1.5835923 -0.4964230
C 0.6157102 3.1192599 -0.9291145
C 2.7770116 2.2866507 0.5364068
C -4.9527565 -0.4791017 -0.3846112
N -6.0592986 -0.7577330 -0.5972653
C 1.4342707 -1.0634422 2.5321967
H 3.7321350 -0.6024661 0.8257200
H 0.6466460 1.2680273 1.6989122
H -1.5075419 0.5617023 2.4714361
H -3.8524956 -0.0444872 2.0224325
H -3.0177249 -0.1280227 -2.2043266
H -0.6842104 0.4384677 -1.7709218
H 0.8548096 -1.4040752 -1.8256274
H 1.3467254 -3.0897433 -1.6153850
H 0.8341425 -3.0545795 0.7400909
H -0.3495514 -1.8395144 0.2657734
H 1.3016120 3.7167748 -1.5342837
H -0.2662281 2.8635297 -1.5175133
H 0.3354595 3.6468408 -0.0158718
H 3.4870984 2.7918199 -0.1199164
H 3.2656857 1.4697238 1.0635009
H 2.3210431 2.9884607 1.2375994
H 0.3915459 -0.9332102 2.8383020
H 1.7863966 -2.0221209 2.9350535
H 2.0369991 -0.2670071 2.9787589
```

```
lc_sy_tr_1_ts2.log
E = -1148.913277
H = -1148.580291
G = -1148.648062
```

```
NImag=1
C -1.6144344 -1.7534542 0.2905110
C -1.7301211 -0.3795066 0.9122088
C -2.5904460 -1.9654843 -0.6972656
O -2.7607953 -2.9481945 -1.4604368
C -0.7362605 0.2410626 -0.0350402
C 0.7173702 -0.1263679 -0.0002620
C 1.3030031 -0.6461522 -1.1625499
C 2.6535561 -0.9651114 -1.1992882
```

|   |            |            |            |
|---|------------|------------|------------|
| C | 3.4374648  | -0.7464503 | -0.0594974 |
| C | 2.8748608  | -0.2070090 | 1.1025367  |
| C | 1.5199058  | 0.1030191  | 1.1254300  |
| C | -3.5032257 | -0.7283914 | -0.7408720 |
| C | -3.1760782 | 0.0255568  | 0.5524073  |
| S | -0.5343019 | 2.4290447  | 0.2354647  |
| C | 0.7010794  | 2.7435293  | -1.0485029 |
| C | -1.9934215 | 3.0479856  | -0.6363936 |
| C | 4.8390063  | -1.0698220 | -0.0873933 |
| N | 5.9673195  | -1.3301716 | -0.1100313 |
| C | -1.4282958 | -0.2715600 | 2.3994636  |
| H | -0.7963836 | -2.4321026 | 0.5097629  |
| H | -1.1176661 | 0.3315753  | -1.0537936 |
| H | 0.6869470  | -0.8089220 | -2.0424920 |
| H | 3.1016571  | -1.3758120 | -2.0979208 |
| H | 3.4951321  | -0.0263626 | 1.9741145  |
| H | 1.1015371  | 0.5498087  | 2.0212264  |
| H | -3.2663771 | -0.1403802 | -1.6391380 |
| H | -4.5541184 | -1.0224838 | -0.8161896 |
| H | -3.8188347 | -0.3425755 | 1.3594813  |
| H | -3.3184158 | 1.1075769  | 0.4895810  |
| H | 0.7200720  | 3.8168514  | -1.2474130 |
| H | 1.6752988  | 2.4236402  | -0.6761348 |
| H | 0.4404928  | 2.1935318  | -1.9570918 |
| H | -1.7413426 | 4.0186764  | -1.0686300 |
| H | -2.8015741 | 3.1750034  | 0.0837238  |
| H | -2.2866667 | 2.3490511  | -1.4253617 |
| H | -1.3787102 | 0.7728511  | 2.7322697  |
| H | -2.2293666 | -0.7685697 | 2.9557341  |
| H | -0.4908187 | -0.7666108 | 2.6646368  |

lc\_sy\_tr\_2.log

E = -1148.923706

H = -1148.588934

G = -1148.655727

NImag=0

|   |            |            |            |
|---|------------|------------|------------|
| C | -3.9676715 | 3.1181334  | 1.3164904  |
| C | -2.8566371 | 2.4742771  | 2.0972583  |
| C | -3.8845706 | 2.8864610  | -0.0445004 |
| O | -4.7340293 | 3.1050178  | -0.9663416 |
| C | -3.4073233 | 1.1863064  | 2.8133587  |
| C | -2.4220294 | 0.4081620  | 3.6553960  |
| C | -1.4460430 | -0.4354854 | 3.1077868  |
| C | -0.5292284 | -1.0837190 | 3.9259582  |
| C | -0.5823678 | -0.8853471 | 5.3103607  |
| C | -1.5579985 | -0.0564931 | 5.8755908  |
| C | -2.4744385 | 0.5758889  | 5.0447032  |
| C | -2.5439670 | 2.1962753  | -0.3461289 |
| C | -1.7945979 | 2.1966855  | 0.9951232  |
| S | -4.1989358 | 0.0442748  | 1.5739152  |
| C | -4.6260000 | -1.3698054 | 2.6189570  |
| C | -5.8720844 | 0.6850917  | 1.3041703  |
| C | 0.3684680  | -1.5502321 | 6.1611127  |
| N | 1.1340570  | -2.0851156 | 6.8459787  |
| C | -2.2771887 | 3.3561989  | 3.2132007  |
| H | -4.8564372 | 3.5105174  | 1.8084884  |
| H | -4.2456273 | 1.4952900  | 3.4492027  |
| H | -1.3995487 | -0.6159059 | 2.0376017  |
| H | 0.2209085  | -1.7402639 | 3.4981049  |
| H | -1.5997298 | 0.0819319  | 6.9508709  |
| H | -3.2384711 | 1.2142972  | 5.4790131  |

|   |            |            |            |
|---|------------|------------|------------|
| H | -2.7353896 | 1.1854207  | -0.7306979 |
| H | -2.0018214 | 2.7343036  | -1.1319095 |
| H | -1.0836487 | 3.0294594  | 1.0184766  |
| H | -1.2113308 | 1.2887413  | 1.1708123  |
| H | -5.2874835 | -2.0046580 | 2.0269696  |
| H | -3.7173571 | -1.9168987 | 2.8669869  |
| H | -5.1328674 | -1.0150601 | 3.5193184  |
| H | -6.4705718 | -0.1745031 | 0.9926420  |
| H | -5.8296975 | 1.4356397  | 0.5140019  |
| H | -6.2522744 | 1.1012390  | 2.2390812  |
| H | -1.3906618 | 2.9087061  | 3.6776684  |
| H | -1.9886271 | 4.3201984  | 2.7837535  |
| H | -3.0180771 | 3.5427701  | 4.0001249  |

lc\_sy\_tr\_2\_r.log

E = -1148.921327

H = -1148.586649

G = -1148.653883

NImag=0

|   |            |            |            |
|---|------------|------------|------------|
| C | 1.5385609  | -1.4697057 | -0.8533844 |
| C | 1.3330854  | -1.1648585 | 0.6103224  |
| C | 0.6131607  | -2.3699647 | -1.3592634 |
| O | 0.4309198  | -2.7978258 | -2.5411350 |
| C | 0.4861842  | 0.1610365  | 0.7139364  |
| C | 0.8601103  | 1.2521764  | -0.2676110 |
| C | 2.0403963  | 1.9966310  | -0.1541596 |
| C | 2.3562243  | 2.9685799  | -1.0973124 |
| C | 1.4805765  | 3.2031179  | -2.1627299 |
| C | 0.2904368  | 2.4757198  | -2.2828913 |
| C | -0.0122241 | 1.5107694  | -1.3311536 |
| C | -0.2859778 | -2.8288055 | -0.1993355 |
| C | 0.4586589  | -2.3712431 | 1.0580617  |
| S | 0.5378385  | 0.9916667  | 2.3874813  |
| C | -0.7553969 | 2.2376733  | 2.1987336  |
| C | -0.2929888 | -0.1453009 | 3.5122860  |
| C | 1.8024246  | 4.2081250  | -3.1406669 |
| N | 2.0602012  | 5.0173773  | -3.9280463 |
| C | 2.6330921  | -1.0801590 | 1.4162975  |
| H | 2.2400909  | -0.9084161 | -1.4668537 |
| H | -0.5724299 | -0.0882289 | 0.5725485  |
| H | 2.7278750  | 1.8329254  | 0.6699256  |
| H | 3.2726043  | 3.5426918  | -1.0096809 |
| H | -0.3850615 | 2.6681847  | -3.1097262 |
| H | -0.9333737 | 0.9414892  | -1.4182180 |
| H | -1.2697939 | -2.3474601 | -0.2959319 |
| H | -0.4521381 | -3.9109529 | -0.2306281 |
| H | 1.1388931  | -3.1629440 | 1.3922209  |
| H | -0.2077787 | -2.1409625 | 1.8930280  |
| H | -0.9555532 | 2.6442737  | 3.1920456  |
| H | -0.3742088 | 3.0238367  | 1.5461454  |
| H | -1.6501579 | 1.7732173  | 1.7784498  |
| H | -0.4753088 | 0.4164226  | 4.4309618  |
| H | 0.3772250  | -0.9795437 | 3.7201999  |
| H | -1.2334590 | -0.4819284 | 3.0722017  |
| H | 2.4616818  | -0.9665675 | 2.4958750  |
| H | 3.1922786  | -2.0096799 | 1.2733907  |
| H | 3.2742565  | -0.2578669 | 1.0824101  |

lc\_sy\_tr\_3.log

E = -1148.922800

```

H =      -1148.588229
G =      -1148.655927
NImag=0
C      -3.4610439      2.0874590      0.6519687
C      -3.8090695      2.5397471      2.0447883
C      -2.1439757      2.3285765      0.2998657
O      -1.4996368      2.0365176      -0.7559101
C      -3.9835121      1.3744874      3.0808963
C      -2.7646768      0.6282986      3.5627437
C      -1.8154766      0.0668315      2.6952804
C      -0.7012253      -0.5924474      3.1996706
C      -0.5290676      -0.7002173      4.5846882
C      -1.4666966      -0.1511439      5.4654368
C      -2.5757124      0.5060298      4.9465744
C      -1.4468876      3.0464403      1.4693947
C      -2.5705661      3.3971523      2.4547225
S      -5.2917696      0.2112702      2.4342141
C      -4.4624747      -1.1615783      1.6119102
C      -5.8283779      -0.6101980      3.9466889
C      0.6239847      -1.3844749      5.1074121
N      1.5516242      -1.9356409      5.5280790
C      -5.0870135      3.3926101      2.1114410
H      -4.1812931      1.5888681      0.0038061
H      -4.4999624      1.7718242      3.9642803
H      -1.9422522      0.1518648      1.6216573
H      0.0332741      -1.0224270      2.5266161
H      -1.3265376      -0.2380748      6.5376513
H      -3.3047392      0.9376461      5.6269655
H      -0.6912148      2.3790707      1.9040670
H      -0.9161829      3.9330766      1.1044730
H      -2.8465602      4.4510079      2.3440033
H      -2.2944716      3.2496185      3.5052871
H      -5.2610052      -1.8329046      1.2877682
H      -3.9307357      -0.7685583      0.7450348
H      -3.7907217      -1.6693697      2.3050766
H      -6.5453737      -1.3810251      3.6580222
H      -6.3154451      0.1357710      4.5765992
H      -4.9681612      -1.0548144      4.4515594
H      -5.2688970      3.7680751      3.1266374
H      -4.9801259      4.2498291      1.4404065
H      -5.9753211      2.8361020      1.7902234

```

```

lc_sy_tr_3_r.log
E =      -1148.921652
H =      -1148.587062
G =      -1148.653689
NImag=0
C      -1.5934229      -1.6190026      -0.1787860
C      -2.1743283      -0.3410941      -0.7337003
C      -1.0954243      -2.4592533      -1.1645715
O      -0.4845546      -3.5688008      -1.0788841
C      -1.0565524      0.7548916      -0.6750194
C      -0.2135045      0.8962133      0.5690581
C      -0.7541532      0.9362681      1.8618246
C      0.0704400      1.0610210      2.9720851
C      1.4566897      1.1509017      2.7954213
C      2.0159308      1.1136400      1.5147014
C      1.1762106      0.9863833      0.4141498
C      -1.3733888      -1.8105335      -2.5331975
C      -2.3932514      -0.7098965      -2.2283118
S      -1.7264250      2.4245779      -1.2272583

```



|   |            |            |            |
|---|------------|------------|------------|
| C | -2.2248081 | 3.3014059  | 0.2677685  |
| C | -0.2279679 | 3.3336889  | -1.6492491 |
| C | 2.3138151  | 1.2802704  | 3.9437488  |
| N | 3.0037552  | 1.3861385  | 4.8678613  |
| C | -3.5010760 | 0.0952442  | -0.1002042 |
| H | -1.4579509 | -1.7815128 | 0.8878096  |
| H | -0.3738976 | 0.5498815  | -1.5086787 |
| H | -1.8242503 | 0.8662164  | 2.0164303  |
| H | -0.3529724 | 1.0876543  | 3.9705216  |
| H | 3.0912431  | 1.1777452  | 1.3858302  |
| H | 1.6081863  | 0.9445927  | -0.5821055 |
| H | -0.4328752 | -1.4084930 | -2.9357966 |
| H | -1.7412582 | -2.5492990 | -3.2529684 |
| H | -3.4083370 | -1.1093243 | -2.3288185 |
| H | -2.3208602 | 0.1598905  | -2.8939066 |
| H | -2.6088581 | 4.2688542  | -0.0625878 |
| H | -3.0198920 | 2.7351690  | 0.7543908  |
| H | -1.3666236 | 3.4326146  | 0.9284772  |
| H | -0.5346306 | 4.3409881  | -1.9376845 |
| H | 0.2391585  | 2.8295345  | -2.4969693 |
| H | 0.4430023  | 3.3679048  | -0.7887996 |
| H | -3.9530774 | 0.9490346  | -0.6243028 |
| H | -4.2075338 | -0.7368365 | -0.1758802 |
| H | -3.4139242 | 0.3530435  | 0.9585099  |

lc\_sy\_tr\_3\_ts1.log

E = -1148.900288

H = -1148.568122

G = -1148.634394

NImag=1

|   |            |            |            |
|---|------------|------------|------------|
| C | -1.3627875 | -1.7996573 | 0.8256942  |
| C | -1.6851826 | -1.4349335 | -0.4894281 |
| C | -0.0833898 | -2.4272607 | 0.9039935  |
| O | 0.4971526  | -2.8889335 | 1.9014282  |
| C | -1.1809235 | 0.6384173  | -0.8586239 |
| C | 0.2316733  | 0.7559975  | -0.5498189 |
| C | 0.7356969  | 0.7254335  | 0.7682324  |
| C | 2.1015371  | 0.6857149  | 1.0128929  |
| C | 3.0034739  | 0.6709095  | -0.0586477 |
| C | 2.5271451  | 0.7205622  | -1.3812938 |
| C | 1.1652965  | 0.7674096  | -1.6132915 |
| C | 0.4975472  | -2.5098665 | -0.5107954 |
| C | -0.6558642 | -2.0722716 | -1.4223676 |
| S | -2.3535718 | 1.6922349  | -0.0782134 |
| C | -2.7494573 | 1.1344226  | 1.5988861  |
| C | -1.5262995 | 3.2503955  | 0.3347492  |
| C | 4.4138714  | 0.6207749  | 0.1938593  |
| N | 5.5552969  | 0.5803923  | 0.3962878  |
| C | -3.1065025 | -1.3663175 | -0.9933813 |
| H | -1.9917564 | -1.6340170 | 1.6941694  |
| H | -1.4131751 | 0.6992317  | -1.9213794 |
| H | 0.0605275  | 0.7135360  | 1.6158104  |
| H | 2.4730523  | 0.6521811  | 2.0323406  |
| H | 3.2286008  | 0.7264814  | -2.2097603 |
| H | 0.7984023  | 0.8078457  | -2.6352972 |
| H | 1.3686424  | -1.8473863 | -0.5779595 |
| H | 0.8431552  | -3.5287819 | -0.7114643 |
| H | -1.1350144 | -2.9452847 | -1.8843498 |
| H | -0.3512445 | -1.4082478 | -2.2368631 |
| H | -3.4001294 | 1.9108545  | 2.0084636  |
| H | -3.3012664 | 0.1982312  | 1.5360453  |

|   |            |            |            |
|---|------------|------------|------------|
| H | -1.8587414 | 1.0279098  | 2.2161283  |
| H | -2.2700574 | 3.9017606  | 0.7984742  |
| H | -1.1742141 | 3.6871496  | -0.6008488 |
| H | -0.6942019 | 3.0687598  | 1.0168273  |
| H | -3.1725599 | -0.8730409 | -1.9677097 |
| H | -3.4763009 | -2.3931484 | -1.1117967 |
| H | -3.7797302 | -0.8623716 | -0.2939312 |

lc\_sy\_tr\_3\_ts2.log

E = -1148.913536  
H = -1148.580520  
G = -1148.647973

NImag=1

|   |            |            |            |
|---|------------|------------|------------|
| C | -1.8158607 | -1.6405567 | 0.6048841  |
| C | -1.9676553 | -0.1484731 | 0.7701176  |
| C | -2.6909623 | -2.1608608 | -0.3640032 |
| O | -2.8002735 | -3.3357179 | -0.7921526 |
| C | -0.8621514 | 0.1940795  | -0.1891786 |
| C | 0.5685070  | -0.2006935 | -0.0684903 |
| C | 1.2138210  | -0.4718416 | 1.1491126  |
| C | 2.5652553  | -0.7840937 | 1.1811146  |
| C | 3.2973969  | -0.8219549 | -0.0128876 |
| C | 2.6735832  | -0.5608700 | -1.2374829 |
| C | 1.3185516  | -0.2570705 | -1.2547385 |
| C | -3.5625418 | -1.0133093 | -0.8966472 |
| C | -3.3326561 | 0.1342241  | 0.0931154  |
| S | -0.7243727 | 2.4364245  | -0.1955790 |
| C | 0.6245985  | 2.7903279  | 0.9492383  |
| C | 0.0820269  | 2.8353538  | -1.7599140 |
| C | 4.6994976  | -1.1395411 | 0.0210603  |
| N | 5.8292299  | -1.3938540 | 0.0487895  |
| C | -1.9198927 | 0.4554647  | 2.1702500  |
| H | -1.0413060 | -2.2170086 | 1.0996072  |
| H | -1.1964592 | 0.1476326  | -1.2274438 |
| H | 0.6669567  | -0.4564857 | 2.0827251  |
| H | 3.0559804  | -0.9971526 | 2.1250266  |
| H | 3.2426109  | -0.6026765 | -2.1601877 |
| H | 0.8275893  | -0.0687205 | -2.2058417 |
| H | -3.2376740 | -0.7632691 | -1.9152199 |
| H | -4.6102235 | -1.3221859 | -0.9597380 |
| H | -4.0982289 | 0.1088712  | 0.8758270  |
| H | -3.3620951 | 1.1291935  | -0.3663666 |
| H | 0.7895461  | 3.8699087  | 0.9666936  |
| H | 0.3239866  | 2.4497962  | 1.9423418  |
| H | 1.5332043  | 2.2742045  | 0.6294392  |
| H | 0.2234589  | 3.9171589  | -1.8132547 |
| H | -0.5749238 | 2.5115898  | -2.5695471 |
| H | 1.0473486  | 2.3284855  | -1.8268728 |
| H | -2.1114955 | 1.5358832  | 2.1358661  |
| H | -2.7122189 | 0.0000261  | 2.7726558  |
| H | -0.9752075 | 0.2974036  | 2.6924911  |

lc\_sy\_tr\_4.log

E = -1148.915933  
H = -1148.581276  
G = -1148.648386

NImag=0

|   |            |           |            |
|---|------------|-----------|------------|
| C | -4.0897519 | 2.8415424 | 1.2324843  |
| C | -2.9942999 | 2.2339570 | 2.0675226  |
| C | -3.7321423 | 3.0444960 | -0.0861227 |

|   |            |            |            |
|---|------------|------------|------------|
| O | -4.3658900 | 3.5843812  | -1.0492228 |
| C | -3.5094401 | 1.0702406  | 2.9774069  |
| C | -2.4603900 | 0.3669978  | 3.8154046  |
| C | -1.6080425 | -0.6132524 | 3.2925039  |
| C | -0.6358361 | -1.2065023 | 4.0893121  |
| C | -0.5111353 | -0.8160543 | 5.4268263  |
| C | -1.3611331 | 0.1548736  | 5.9691145  |
| C | -2.3313125 | 0.7332837  | 5.1610166  |
| C | -2.3049261 | 2.5103676  | -0.2938910 |
| C | -1.9225408 | 1.8056943  | 1.0182823  |
| S | -4.5569986 | -0.2602342 | 2.1994052  |
| C | -6.1989279 | 0.4713456  | 2.0423161  |
| C | -4.1332322 | -0.4952384 | 0.4587428  |
| C | 0.4933567  | -1.4282948 | 6.2550992  |
| N | 1.3017982  | -1.9209901 | 6.9221562  |
| C | -2.3842040 | 3.2695722  | 3.0379095  |
| H | -5.0106318 | 3.2106598  | 1.6801977  |
| H | -4.2501144 | 1.5057835  | 3.6602810  |
| H | -1.6920957 | -0.9397258 | 2.2599882  |
| H | 0.0201137  | -1.9676486 | 3.6805152  |
| H | -1.2645210 | 0.4442433  | 7.0102272  |
| H | -2.9971890 | 1.4835413  | 5.5779857  |
| H | -2.2688230 | 1.8389330  | -1.1612190 |
| H | -1.6438163 | 3.3566912  | -0.5203560 |
| H | -0.9187635 | 2.0703330  | 1.3669533  |
| H | -1.9163883 | 0.7250921  | 0.8677789  |
| H | -6.8661903 | -0.3431932 | 1.7525272  |
| H | -6.4872942 | 0.8541088  | 3.0227833  |
| H | -6.1805303 | 1.2629412  | 1.2949736  |
| H | -4.9201868 | -1.1469324 | 0.0705483  |
| H | -3.1739312 | -1.0089434 | 0.3953105  |
| H | -4.1291284 | 0.4636468  | -0.0589201 |
| H | -1.5454737 | 2.8693291  | 3.6193102  |
| H | -2.0130648 | 4.1118600  | 2.4448690  |
| H | -3.1409226 | 3.6521949  | 3.7332791  |

lc\_sy\_tr\_4\_r.log

E = -1148.914135

H = -1148.579039

G = -1148.645211

NImag=0

|   |            |            |            |
|---|------------|------------|------------|
| C | -1.9251226 | -1.1837545 | -1.8047201 |
| C | -1.2105946 | -0.8930963 | -0.4976648 |
| C | -3.2383095 | -1.5867053 | -1.6072724 |
| O | -4.1005216 | -2.0331609 | -2.4255199 |
| C | -0.3527343 | 0.3871165  | -0.6966823 |
| C | 0.7835134  | 0.2461182  | -1.6877981 |
| C | 1.9636702  | -0.4419195 | -1.3787270 |
| C | 2.9753912  | -0.5706487 | -2.3222733 |
| C | 2.8041767  | -0.0083320 | -3.5926476 |
| C | 1.6332198  | 0.6857338  | -3.9160179 |
| C | 0.6339740  | 0.8128226  | -2.9584159 |
| C | -3.5530413 | -1.4754134 | -0.1061774 |
| C | -2.4074035 | -0.6285005 | 0.4548137  |
| S | 0.3801157  | 1.2953467  | 0.7840893  |
| C | -1.0007199 | 2.2002831  | 1.5174614  |
| C | 0.7708558  | 0.1669880  | 2.1378373  |
| C | 3.8477245  | -0.1411307 | -4.5744293 |
| N | 4.6876815  | -0.2477189 | -5.3645726 |
| C | -0.3913771 | -2.1140468 | -0.0408233 |
| H | -1.3847723 | -1.3221390 | -2.7385858 |

|   |            |            |            |
|---|------------|------------|------------|
| H | -1.0286472 | 1.1717602  | -1.0545743 |
| H | 2.1058466  | -0.8922071 | -0.4001527 |
| H | 3.8893234  | -1.1033046 | -2.0815254 |
| H | 1.5129811  | 1.1229403  | -4.9016406 |
| H | -0.2750524 | 1.3556700  | -3.2003660 |
| H | -4.5387149 | -1.0308063 | 0.0676424  |
| H | -3.5708428 | -2.4859866 | 0.3244400  |
| H | -2.1663123 | -0.8469074 | 1.5018807  |
| H | -2.6957865 | 0.4259200  | 0.3825423  |
| H | -0.5556951 | 2.9132805  | 2.2145400  |
| H | -1.5138868 | 2.7375203  | 0.7181747  |
| H | -1.6723525 | 1.5202283  | 2.0398859  |
| H | 1.0819064  | 0.8160297  | 2.9606447  |
| H | 1.6066104  | -0.4668408 | 1.8415189  |
| H | -0.1045546 | -0.4164544 | 2.4216993  |
| H | 0.2136514  | -1.9462871 | 0.8555249  |
| H | -1.0905804 | -2.9276672 | 0.1806094  |
| H | 0.2687943  | -2.4634377 | -0.8402868 |

lc\_sy\_tr\_4\_ts1.log

E = -1148.890393

H = -1148.558271

G = -1148.625290

NImag=1

|   |            |            |            |
|---|------------|------------|------------|
| C | 2.7660741  | -0.9322796 | 0.8323180  |
| C | 1.4014941  | -1.2343231 | 0.7045648  |
| C | 3.4713118  | -1.1373795 | -0.3844156 |
| O | 4.6712944  | -0.9242042 | -0.6373167 |
| C | 0.2501397  | 0.6349363  | 0.7700012  |
| C | -1.1483448 | 0.4298491  | 0.4326623  |
| C | -1.6280340 | 0.5266009  | -0.8952930 |
| C | -2.9527821 | 0.2653880  | -1.2073169 |
| C | -3.8471159 | -0.1174132 | -0.1970353 |
| C | -3.3962675 | -0.2238791 | 1.1307126  |
| C | -2.0754311 | 0.0500308  | 1.4339400  |
| C | 2.5018259  | -1.7203130 | -1.4150239 |
| C | 1.1497395  | -1.8015285 | -0.6908693 |
| S | 0.9413263  | 2.0438361  | -0.0755871 |
| C | 2.2250613  | 2.5856896  | 1.0664996  |
| C | 1.9678334  | 1.5218218  | -1.4805180 |
| C | -5.2151967 | -0.3939842 | -0.5158262 |
| N | -6.3243951 | -0.6180348 | -0.7729659 |
| C | 0.6239783  | -1.8339435 | 1.8458046  |
| H | 3.2392458  | -0.5980722 | 1.7511406  |
| H | 0.4481760  | 0.7900483  | 1.8297447  |
| H | -0.9554135 | 0.8037663  | -1.7038691 |
| H | -3.2989564 | 0.3496134  | -2.2327459 |
| H | -4.0911338 | -0.5065239 | 1.9154724  |
| H | -1.7409256 | -0.0137590 | 2.4655383  |
| H | 2.4910777  | -1.0949428 | -2.3140153 |
| H | 2.8669175  | -2.7071736 | -1.7189970 |
| H | 0.8087519  | -2.8386304 | -0.5875248 |
| H | 0.3511681  | -1.2620741 | -1.2108440 |
| H | 2.7926973  | 3.3744570  | 0.5694596  |
| H | 1.7330306  | 2.9806793  | 1.9563190  |
| H | 2.8640936  | 1.7359033  | 1.3118587  |
| H | 2.1796754  | 2.4365692  | -2.0385073 |
| H | 1.3716882  | 0.8487124  | -2.0977558 |
| H | 2.8933428  | 1.0573716  | -1.1455089 |
| H | -0.4463237 | -1.8957262 | 1.6366694  |
| H | 0.9896464  | -2.8593240 | 1.9871439  |

H 0.7798898 -1.2902257 2.7820802

lc\_sy\_tr\_4\_ts2.log

E = -1148.909209

H = -1148.576233

G = -1148.644509

NImag=1

|   |            |            |            |
|---|------------|------------|------------|
| C | -1.3286938 | -1.8480868 | 0.4879336  |
| C | -1.5367756 | -0.4144808 | 0.9179255  |
| C | -2.3315729 | -2.2846122 | -0.3927870 |
| O | -2.4538499 | -3.3820031 | -0.9913770 |
| C | -0.6509925 | 0.1522086  | -0.1689298 |
| C | 0.8335354  | -0.0786864 | -0.1541926 |
| C | 1.6530562  | 0.4400155  | 0.8564232  |
| C | 3.0238667  | 0.2142973  | 0.8412951  |
| C | 3.5853825  | -0.5299689 | -0.2030310 |
| C | 2.7837832  | -1.0345492 | -1.2339689 |
| C | 1.4150936  | -0.7991625 | -1.2046356 |
| C | -3.3537164 | -1.1472686 | -0.5529213 |
| C | -3.0305224 | -0.1857604 | 0.5963105  |
| S | -0.6438685 | 2.3546957  | -0.4011983 |
| C | -1.9306666 | 2.5158561  | -1.6572719 |
| C | -1.4534097 | 3.1281449  | 1.0167908  |
| C | 5.0039276  | -0.7678877 | -0.2228842 |
| N | 6.1461048  | -0.9594902 | -0.2386386 |
| C | -1.1577465 | -0.1064382 | 2.3600489  |
| H | -0.4442306 | -2.4181880 | 0.7535433  |
| H | -1.0804150 | 0.0174956  | -1.1618717 |
| H | 1.2283786  | 1.0410364  | 1.6552453  |
| H | 3.6573146  | 0.6149822  | 1.6256856  |
| H | 3.2303307  | -1.6016706 | -2.0439117 |
| H | 0.7841628  | -1.1896650 | -1.9980814 |
| H | -3.2184755 | -0.6774356 | -1.5379950 |
| H | -4.3759888 | -1.5349611 | -0.5189356 |
| H | -3.5980049 | -0.4755236 | 1.4875226  |
| H | -3.2731130 | 0.8585276  | 0.3789556  |
| H | -2.1133759 | 3.5781353  | -1.8321165 |
| H | -1.5524793 | 2.0573526  | -2.5731962 |
| H | -2.8499264 | 2.0204791  | -1.3389487 |
| H | -1.6830210 | 4.1597735  | 0.7399610  |
| H | -0.7455302 | 3.1260022  | 1.8471063  |
| H | -2.3673800 | 2.5998589  | 1.2907063  |
| H | -1.1958958 | 0.9632824  | 2.5897591  |
| H | -1.8650338 | -0.6208782 | 3.0185024  |
| H | -0.1578139 | -0.4771996 | 2.6013337  |

lc\_sy\_tr\_5\_ts1.log

E = -1148.897964

H = -1148.565952

G = -1148.633778

NImag=1

|   |            |            |            |
|---|------------|------------|------------|
| C | 2.8346468  | -1.0401197 | 0.4018099  |
| C | 1.5778777  | -1.0925651 | 1.0364897  |
| C | 2.7835210  | -1.6192040 | -0.8993996 |
| O | 3.6915664  | -1.7441709 | -1.7392687 |
| C | 0.4910122  | 0.7810656  | 0.7357664  |
| C | -0.8934996 | 0.5435715  | 0.3963632  |
| C | -1.3632591 | 0.3470537  | -0.9257934 |
| C | -2.6822036 | 0.0160752  | -1.1807997 |
| C | -3.5890524 | -0.1344561 | -0.1189154 |

|   |            |            |            |
|---|------------|------------|------------|
| C | -3.1506370 | 0.0649262  | 1.2017022  |
| C | -1.8329964 | 0.4039142  | 1.4482028  |
| C | 1.3492122  | -2.1071116 | -1.1365504 |
| C | 0.7160718  | -2.0766417 | 0.2570434  |
| S | 1.4776101  | 1.5821628  | -0.4997586 |
| C | 0.6165799  | 3.1172272  | -0.9351801 |
| C | 2.7782121  | 2.2869325  | 0.5311079  |
| C | -4.9529052 | -0.4778468 | -0.3813637 |
| N | -6.0596343 | -0.7564714 | -0.5930512 |
| C | 1.4347911  | -1.0589010 | 2.5342128  |
| H | 3.7323943  | -0.6021046 | 0.8262876  |
| H | 0.6479673  | 1.2712888  | 1.6965317  |
| H | -0.6845129 | 0.4351961  | -1.7711142 |
| H | -3.0184078 | -0.1312414 | -2.2025023 |
| H | -3.8515784 | -0.0387667 | 2.0243870  |
| H | -1.5062234 | 0.5674121  | 2.4712875  |
| H | 0.8541035  | -1.4077706 | -1.8227903 |
| H | 1.3454549  | -3.0932098 | -1.6094146 |
| H | 0.8334928  | -3.0533034 | 0.7461194  |
| H | -0.3498847 | -1.8387298 | 0.2697576  |
| H | 1.3024090  | 3.7133165  | -1.5418343 |
| H | -0.2656882 | 2.8605941  | -1.5226907 |
| H | 0.3368808  | 3.6467207  | -0.0228751 |
| H | 3.4879478  | 2.7908979  | -0.1265225 |
| H | 3.2671553  | 1.4709135  | 1.0593591  |
| H | 2.3226906  | 2.9900167  | 1.2313142  |
| H | 0.3921983  | -0.9276368 | 2.8403248  |
| H | 1.7866125  | -2.0169437 | 2.9388447  |
| H | 2.0379674  | -0.2618535 | 2.9790739  |

lc\_sy\_tr\_6.log

E = -1148.922026

H = -1148.587246

G = -1148.653756

NImag=0

|   |            |            |            |
|---|------------|------------|------------|
| C | -3.9204538 | 3.3569098  | 1.4750009  |
| C | -2.7599005 | 2.5165820  | 1.9405601  |
| C | -4.1938231 | 3.2343259  | 0.1228694  |
| O | -5.1070832 | 3.7494770  | -0.5951365 |
| C | -3.2948209 | 1.3232462  | 2.8129832  |
| C | -2.3468417 | 0.4962336  | 3.6484925  |
| C | -1.1666948 | -0.0653860 | 3.1397869  |
| C | -0.3166230 | -0.7941122 | 3.9610404  |
| C | -0.6440010 | -0.9687332 | 5.3113588  |
| C | -1.8151772 | -0.4164958 | 5.8388445  |
| C | -2.6555260 | 0.3100107  | 5.0025897  |
| C | -3.1599574 | 2.2729114  | -0.4890973 |
| C | -2.0860170 | 2.1152088  | 0.5955786  |
| S | -4.4425606 | 0.2640831  | 1.8003913  |
| C | -3.4800775 | -1.1469014 | 1.2188943  |
| C | -5.4178017 | -0.5453923 | 3.0831016  |
| C | 0.2379854  | -1.7201199 | 6.1647941  |
| N | 0.9478079  | -2.3251976 | 6.8511899  |
| C | -1.7840477 | 3.2815531  | 2.8495550  |
| H | -4.5241977 | 3.9324313  | 2.1750470  |
| H | -4.0240397 | 1.7754863  | 3.4962965  |
| H | -0.8955452 | 0.0630324  | 2.0984669  |
| H | 0.5964398  | -1.2240500 | 3.5631466  |
| H | -2.0599193 | -0.5524907 | 6.8869139  |
| H | -3.5630170 | 0.7473276  | 5.4101362  |
| H | -3.6544139 | 1.3234260  | -0.7452204 |

|   |            |            |            |
|---|------------|------------|------------|
| H | -2.7586886 | 2.6768257  | -1.4248666 |
| H | -1.2796053 | 2.8337353  | 0.4121606  |
| H | -1.6192550 | 1.1269909  | 0.6078522  |
| H | -4.1904211 | -1.7940874 | 0.6997391  |
| H | -2.7290922 | -0.7915787 | 0.5124100  |
| H | -3.0244403 | -1.6740602 | 2.0584866  |
| H | -6.0766133 | -1.2567390 | 2.5811244  |
| H | -6.0107788 | 0.2224706  | 3.5828095  |
| H | -4.7604696 | -1.0604674 | 3.7866395  |
| H | -0.8813094 | 2.7024759  | 3.0744957  |
| H | -1.4828076 | 4.2052693  | 2.3467629  |
| H | -2.2605116 | 3.5516990  | 3.8002019  |

lc\_sy\_tr\_6\_ts1.log  
E = -1148.893354  
H = -1148.561559  
G = -1148.629891

NImag=1

|   |            |            |            |
|---|------------|------------|------------|
| C | -2.8280209 | -1.2669792 | -0.9069104 |
| C | -1.6165525 | -1.4994992 | -0.2529954 |
| C | -3.8246389 | -0.7903334 | -0.0019734 |
| O | -5.0035660 | -0.4785578 | -0.2325270 |
| C | -0.3499626 | 0.2764771  | -0.6946477 |
| C | 1.0712515  | 0.1783021  | -0.3917165 |
| C | 1.6043222  | 0.2605788  | 0.9166665  |
| C | 2.9504366  | 0.0400264  | 1.1623830  |
| C | 3.8131958  | -0.2934331 | 0.1074527  |
| C | 3.3069926  | -0.4060066 | -1.1975549 |
| C | 1.9641982  | -0.1693114 | -1.4345972 |
| C | -3.2048078 | -0.7294885 | 1.3992034  |
| C | -1.8441053 | -1.4215805 | 1.2497388  |
| S | -1.2939508 | 1.6909107  | -0.2570331 |
| C | -0.9577165 | 2.1482816  | 1.4580531  |
| C | -0.5205205 | 3.1266833  | -1.0554539 |
| C | 5.2027661  | -0.5290599 | 0.3632775  |
| N | 6.3283660  | -0.7198175 | 0.5700306  |
| C | -0.5797256 | -2.4594897 | -0.7627250 |
| H | -2.9930524 | -1.3917393 | -1.9730127 |
| H | -0.5736631 | 0.1403469  | -1.7538927 |
| H | 0.9559827  | 0.4611964  | 1.7614729  |
| H | 3.3368577  | 0.1068557  | 2.1746591  |
| H | 3.9713971  | -0.6671368 | -2.0154463 |
| H | 1.5815502  | -0.2491424 | -2.4484436 |
| H | -3.1243422 | 0.3218962  | 1.7024770  |
| H | -3.8637289 | -1.2165642 | 2.1239864  |
| H | -1.8924825 | -2.4508685 | 1.6297692  |
| H | -1.0167252 | -0.9305841 | 1.7718483  |
| H | -1.6675525 | 2.9419460  | 1.7007564  |
| H | -1.1334167 | 1.2886907  | 2.1040523  |
| H | 0.0648111  | 2.5153587  | 1.5572471  |
| H | -1.0513596 | 4.0246049  | -0.7296767 |
| H | -0.6311988 | 2.9957895  | -2.1330374 |
| H | 0.5340084  | 3.1724121  | -0.7753539 |
| H | 0.3565461  | -2.3853524 | -0.2020707 |
| H | -0.9666280 | -3.4789498 | -0.6360725 |
| H | -0.3702868 | -2.3088145 | -1.8262030 |

lc\_sy\_tr\_7\_ts1.log  
E = -1148.900280  
H = -1148.568550

G = -1148.635478  
NImag=1

|   |            |            |            |
|---|------------|------------|------------|
| C | -0.9909988 | 1.9345408  | -0.9141201 |
| C | -1.4457985 | 1.6076080  | 0.3696998  |
| C | 0.3581104  | 2.4012560  | -0.8953207 |
| O | 1.0582211  | 2.8030319  | -1.8400862 |
| C | -1.2675876 | -0.5598356 | 0.6416608  |
| C | 0.1406391  | -0.7872067 | 0.4344778  |
| C | 0.7458307  | -0.7215864 | -0.8431938 |
| C | 2.1241105  | -0.7772510 | -0.9860427 |
| C | 2.9410970  | -0.9111518 | 0.1445826  |
| C | 2.3605062  | -1.0165731 | 1.4236849  |
| C | 0.9876059  | -0.9596941 | 1.5583102  |
| C | 0.8442562  | 2.3976014  | 0.5583173  |
| C | -0.4094451 | 2.0789737  | 1.3852575  |
| S | -2.3330382 | -1.2034914 | -0.6247653 |
| C | -1.8441188 | -2.9310903 | -0.8929181 |
| C | -3.8641772 | -1.5129577 | 0.2814065  |
| C | 4.3648589  | -0.9646516 | -0.0023571 |
| N | 5.5186170  | -1.0068116 | -0.1190882 |
| C | -2.8988076 | 1.7351900  | 0.7486335  |
| H | -1.5831126 | 1.8518635  | -1.8212527 |
| H | -1.6516094 | -0.8307148 | 1.6261670  |
| H | 0.1368297  | -0.6126587 | -1.7361685 |
| H | 2.5740845  | -0.7096849 | -1.9717642 |
| H | 2.9945309  | -1.1441876 | 2.2955533  |
| H | 0.5418762  | -1.0401314 | 2.5459904  |
| H | 1.6324640  | 1.6435064  | 0.6680249  |
| H | 1.2844451  | 3.3694481  | 0.8032154  |
| H | -0.8025881 | 2.9874028  | 1.8596451  |
| H | -0.2394003 | 1.3500949  | 2.1839406  |
| H | -2.5836674 | -3.3799299 | -1.5598160 |
| H | -0.8638326 | -2.9375726 | -1.3707985 |
| H | -1.8124926 | -3.4464401 | 0.0688852  |
| H | -4.5335530 | -2.0426194 | -0.3984699 |
| H | -4.3065954 | -0.5617811 | 0.5699297  |
| H | -3.6377836 | -2.1219137 | 1.1585680  |
| H | -3.1422947 | 1.1970445  | 1.6694304  |
| H | -3.1144968 | 2.7989018  | 0.9141490  |
| H | -3.5599151 | 1.4006404  | -0.0574031 |

lc\_sy\_tr\_8.log  
E = -1148.912723  
H = -1148.577920  
G = -1148.644372  
NImag=0

|   |            |            |            |
|---|------------|------------|------------|
| C | -3.9869112 | 3.2101524  | 1.4142195  |
| C | -2.8575935 | 2.3529129  | 1.9250370  |
| C | -4.0578913 | 3.2841488  | 0.0395171  |
| O | -4.8716886 | 3.8981239  | -0.7234586 |
| C | -3.3799677 | 1.3741539  | 3.0115556  |
| C | -2.3981607 | 0.5540228  | 3.8206898  |
| C | -1.2566204 | -0.0212850 | 3.2467727  |
| C | -0.3959905 | -0.7950500 | 4.0136897  |
| C | -0.6813979 | -1.0045208 | 5.3690390  |
| C | -1.8146852 | -0.4358108 | 5.9583314  |
| C | -2.6634437 | 0.3419376  | 5.1784081  |
| C | -2.9109001 | 2.4504626  | -0.5537889 |
| C | -2.2815607 | 1.6969366  | 0.6302883  |
| S | -4.7339150 | 0.1438243  | 2.5060507  |
| C | -5.4449773 | 0.4941399  | 0.8777466  |



|   |            |            |            |
|---|------------|------------|------------|
| C | -3.9031781 | -1.4207441 | 2.1501214  |
| C | 0.2056505  | -1.8114367 | 6.1648879  |
| N | 0.9187880  | -2.4619229 | 6.8046041  |
| C | -1.7784896 | 3.2069252  | 2.6296401  |
| H | -4.6545799 | 3.7343179  | 2.0965898  |
| H | -3.9601315 | 1.9815837  | 3.7145285  |
| H | -1.0313102 | 0.1313794  | 2.1971046  |
| H | 0.4894683  | -1.2380857 | 3.5703121  |
| H | -2.0238991 | -0.5994951 | 7.0101137  |
| H | -3.5434018 | 0.7903816  | 5.6320928  |
| H | -3.2928865 | 1.7764807  | -1.3311905 |
| H | -2.1959727 | 3.1238623  | -1.0436518 |
| H | -1.1879009 | 1.7509961  | 0.6243382  |
| H | -2.5335335 | 0.6327893  | 0.5789432  |
| H | -6.1229359 | -0.3456668 | 0.7023099  |
| H | -5.9974202 | 1.4288169  | 0.9355574  |
| H | -4.6754254 | 0.5360805  | 0.1083393  |
| H | -4.6842805 | -2.0846956 | 1.7739392  |
| H | -3.5051243 | -1.8195885 | 3.0829060  |
| H | -3.1177337 | -1.2920308 | 1.4047708  |
| H | -0.9129237 | 2.6237241  | 2.9629382  |
| H | -1.4276859 | 3.9635306  | 1.9204312  |
| H | -2.1997896 | 3.7282489  | 3.4978758  |

lc\_sy\_tr\_8\_ts1.log

E = -1148.883946

H = -1148.551841

G = -1148.619500

NImag=1

|   |            |            |            |
|---|------------|------------|------------|
| C | -2.6500529 | -1.4377487 | -0.7492045 |
| C | -1.3862910 | -1.4772570 | -0.1554454 |
| C | -3.6509163 | -1.0488558 | 0.1853898  |
| O | -4.8655294 | -0.8637651 | -0.0035682 |
| C | -0.2804504 | 0.3857351  | -0.7681297 |
| C | 1.1493937  | 0.2961698  | -0.4729389 |
| C | 1.6854564  | 0.5585430  | 0.8094695  |
| C | 3.0288841  | 0.3586496  | 1.0870948  |
| C | 3.8859044  | -0.1294637 | 0.0896069  |
| C | 3.3784793  | -0.4090231 | -1.1904438 |
| C | 2.0394081  | -0.1906606 | -1.4607858 |
| C | -2.9841722 | -0.8583315 | 1.5512669  |
| C | -1.5447121 | -1.3465476 | 1.3518167  |
| S | -0.9275119 | 2.0481778  | -0.5193155 |
| C | -2.6743206 | 1.9164481  | -0.9600684 |
| C | -1.0781198 | 2.3872216  | 1.2496802  |
| C | 5.2729143  | -0.3440107 | 0.3755280  |
| N | 6.3965118  | -0.5183241 | 0.6065479  |
| C | -0.2888779 | -2.3643856 | -0.6716412 |
| H | -2.8485994 | -1.6266610 | -1.8001861 |
| H | -0.4839126 | 0.2269378  | -1.8318137 |
| H | 1.0385836  | 0.8887137  | 1.6153556  |
| H | 3.4174754  | 0.5641541  | 2.0797548  |
| H | 4.0414749  | -0.7821091 | -1.9650214 |
| H | 1.6572442  | -0.3975936 | -2.4565537 |
| H | -3.0455560 | 0.2026468  | 1.8252018  |
| H | -3.5306807 | -1.4147736 | 2.3186434  |
| H | -1.4112464 | -2.3467956 | 1.7853129  |
| H | -0.7778095 | -0.7037566 | 1.7944762  |
| H | -3.0463939 | 2.9396539  | -1.0374585 |
| H | -2.7434106 | 1.4195992  | -1.9290291 |
| H | -3.2225846 | 1.3652545  | -0.1978912 |

|   |            |            |            |
|---|------------|------------|------------|
| H | -1.8356564 | 3.1691516  | 1.3437281  |
| H | -0.1231434 | 2.7676841  | 1.6107036  |
| H | -1.3794881 | 1.4896647  | 1.7892659  |
| H | 0.6500810  | -2.2196744 | -0.1317632 |
| H | -0.6051789 | -3.4042177 | -0.5183390 |
| H | -0.1112241 | -2.2240004 | -1.7424115 |

lc\_sy\_tr\_prod\_1.log

E = -671.038783  
H = -670.787834  
G = -670.844292

NImag=0

|   |            |            |            |
|---|------------|------------|------------|
| C | -0.1030284 | 5.6164365  | -2.1849774 |
| C | -0.6565214 | 4.2372230  | -2.1381219 |
| C | -1.9038539 | 4.2832338  | -1.2734879 |
| C | -2.0944312 | 5.7265074  | -0.8001384 |
| C | -0.7713512 | 6.4503900  | -1.0980215 |
| O | 0.7131385  | 6.0282815  | -2.9873539 |
| C | -0.6681608 | 3.6173290  | -0.7468922 |
| C | -0.6219936 | 2.1339448  | -0.5760397 |
| C | -0.0722338 | 1.2725879  | -1.5307157 |
| C | -0.0530792 | -0.1028996 | -1.3208906 |
| C | -0.5901383 | -0.6260350 | -0.1399463 |
| C | -1.1404741 | 0.2227312  | 0.8305292  |
| C | -1.1513053 | 1.5917458  | 0.6050673  |
| H | -0.1282331 | 4.1555405  | 0.0311084  |
| H | -0.5661977 | 3.5968851  | -3.0089111 |
| C | -3.1338436 | 3.4796447  | -1.6048228 |
| C | -0.5757719 | -2.0464413 | 0.0825021  |
| N | -0.5648290 | -3.1908905 | 0.2625167  |
| H | -2.9051833 | 6.1766464  | -1.3832586 |
| H | -2.3760649 | 5.7685048  | 0.2568349  |
| H | -0.1028265 | 6.4688450  | -0.2288068 |
| H | -0.8968495 | 7.4799809  | -1.4385661 |
| H | 0.3530459  | 1.6727521  | -2.4454459 |
| H | 0.3766641  | -0.7677400 | -2.0630912 |
| H | -1.5542262 | -0.1923159 | 1.7438532  |
| H | -1.5791314 | 2.2552486  | 1.3517898  |
| H | -3.7440298 | 3.3283290  | -0.7065006 |
| H | -3.7432650 | 4.0090365  | -2.3443620 |
| H | -2.8779254 | 2.4968979  | -2.0107508 |

2a.log

E = -308.554827  
H = -308.419756  
G = -308.456691

NImag=0

|   |           |            |           |
|---|-----------|------------|-----------|
| C | 3.6391555 | -0.3862233 | 3.2290148 |
| C | 2.8534666 | -0.4470892 | 2.1412401 |
| C | 3.2381499 | -1.1660487 | 0.8817345 |
| C | 4.3388605 | -2.1952123 | 1.1326634 |
| C | 5.4823789 | -1.5770955 | 1.9375493 |
| C | 4.9938210 | -0.9770690 | 3.2374751 |
| O | 5.6975202 | -0.9370554 | 4.2382934 |
| H | 3.3244173 | 0.1272806  | 4.1338772 |
| H | 1.8850277 | 0.0501172  | 2.1594927 |
| H | 2.3501901 | -1.6380780 | 0.4490800 |
| H | 3.5749463 | -0.4184588 | 0.1479580 |
| H | 3.9184199 | -3.0391255 | 1.6935176 |
| H | 4.7165377 | -2.5895305 | 0.1851136 |

|   |           |            |           |
|---|-----------|------------|-----------|
| H | 6.2731834 | -2.2979345 | 2.1606222 |
| H | 5.9345229 | -0.7540779 | 1.3642691 |

2a\_sy\_c\_1.log

E = -1148.926606  
H = -1148.590629  
G = -1148.658355

NImag=0

|   |            |            |            |
|---|------------|------------|------------|
| C | -0.5813965 | 2.3217067  | 6.4659612  |
| C | -1.2197563 | 1.5773935  | 5.3251893  |
| C | -0.1262868 | 1.7447232  | 7.6391969  |
| O | 0.5221751  | 2.3542663  | 8.5567218  |
| C | -0.2312685 | 1.2549236  | 4.1593314  |
| C | -0.9011403 | 1.0050481  | 2.8327065  |
| C | -0.7085430 | -0.2188829 | 2.1838863  |
| C | -1.3335110 | -0.4836880 | 0.9705292  |
| C | -2.1513064 | 0.4961467  | 0.3966861  |
| C | -2.3499157 | 1.7288047  | 1.0316905  |
| C | -1.7280292 | 1.9744096  | 2.2489625  |
| C | -0.4573666 | 0.2721179  | 7.9067415  |
| C | -1.8296219 | 0.2448849  | 5.7892798  |
| C | -0.8528039 | -0.5347044 | 6.6699464  |
| S | 0.9891880  | 2.6473619  | 3.9681986  |
| C | 1.8155903  | 2.1997801  | 2.4248161  |
| C | 2.3107665  | 2.2125929  | 5.1244842  |
| C | -2.7961822 | 0.2346187  | -0.8629228 |
| N | -3.3141734 | 0.0235883  | -1.8769799 |
| H | -0.3772101 | 3.3841905  | 6.3219714  |
| H | -2.0182196 | 2.1854849  | 4.8793281  |
| H | 0.4050489  | 0.4025758  | 4.4193502  |
| H | -0.0669587 | -0.9708340 | 2.6345799  |
| H | -1.1882146 | -1.4346020 | 0.4687082  |
| H | -2.9848178 | 2.4799465  | 0.5738628  |
| H | -1.8859030 | 2.9320497  | 2.7390997  |
| H | 0.4085385  | -0.1796041 | 8.4043292  |
| H | -1.2763272 | 0.2567945  | 8.6406829  |
| H | -2.1385459 | -0.3595291 | 4.9267614  |
| H | -2.7350847 | 0.4705279  | 6.3665208  |
| H | 0.0486702  | -0.7832495 | 6.0940460  |
| H | -1.2993976 | -1.4911282 | 6.9651544  |
| H | 1.1332995  | 2.3915038  | 1.5963292  |
| H | 2.6911536  | 2.8464185  | 2.3394656  |
| H | 2.1123488  | 1.1490688  | 2.4573213  |
| H | 1.9829777  | 2.4766549  | 6.1292356  |
| H | 3.1850341  | 2.7971611  | 4.8290680  |
| H | 2.5139897  | 1.1422780  | 5.0431597  |

2a\_sy\_c\_10.log

E = -1148.926757  
H = -1148.590852  
G = -1148.658008

NImag=0

|   |            |           |           |
|---|------------|-----------|-----------|
| C | 0.3691311  | 1.5607026 | 6.5507733 |
| C | -0.5354928 | 1.3084066 | 5.3679309 |
| C | 0.2126293  | 1.0147732 | 7.8163056 |
| O | 0.9766152  | 1.2339381 | 8.8168995 |
| C | 0.2506133  | 1.0233088 | 4.0655009 |
| C | -0.5783004 | 0.8162005 | 2.8244466 |
| C | -1.6651806 | 1.6446200 | 2.5117125 |
| C | -2.4130262 | 1.4223513 | 1.3617234 |

|   |            |            |            |
|---|------------|------------|------------|
| C | -2.0751169 | 0.3595149  | 0.5157108  |
| C | -0.9994226 | -0.4827382 | 0.8183194  |
| C | -0.2595339 | -0.2467703 | 1.9705918  |
| C | -0.9630475 | 0.0628421  | 8.0602607  |
| C | -1.4591753 | 0.1032170  | 5.6080559  |
| C | -2.0624346 | 0.1640714  | 7.0073450  |
| S | 1.5371779  | 2.3484826  | 3.8174056  |
| C | 0.6101405  | 3.8839562  | 3.6605738  |
| C | 2.0870615  | 2.1016371  | 2.1202338  |
| C | -2.8483395 | 0.1265681  | -0.6752950 |
| N | -3.4701259 | -0.0607817 | -1.6341175 |
| H | 1.1742184  | 2.2883862  | 6.4424400  |
| H | -1.1830435 | 2.1776432  | 5.1597550  |
| H | 0.8918291  | 0.1484118  | 4.2300534  |
| H | -1.9480303 | 2.4593688  | 3.1708546  |
| H | -3.2554024 | 2.0620540  | 1.1204378  |
| H | -0.7503620 | -1.3079131 | 0.1595772  |
| H | 0.5762300  | -0.8973352 | 2.2128371  |
| H | -0.5707310 | -0.9638213 | 8.0960656  |
| H | -1.3536307 | 0.2801778  | 9.0609584  |
| H | -0.8738602 | -0.8232493 | 5.5090593  |
| H | -2.2466010 | 0.0747456  | 4.8471312  |
| H | -2.7973048 | -0.6389156 | 7.1352610  |
| H | -2.6029262 | 1.1136406  | 7.1239579  |
| H | 0.1128388  | 4.0783925  | 4.6124469  |
| H | 1.3472936  | 4.6656124  | 3.4640505  |
| H | -0.1037341 | 3.8176985  | 2.8381625  |
| H | 2.5289004  | 1.1052491  | 2.0550563  |
| H | 2.8516641  | 2.8575431  | 1.9294998  |
| H | 1.2508791  | 2.2124109  | 1.4279184  |

2a\_sy\_c\_10\_ts1.log

E = -1148.892092

H = -1148.558524

G = -1148.626848

NImag=1

|   |            |            |            |
|---|------------|------------|------------|
| C | 2.8071381  | -0.1624232 | 0.8991350  |
| C | 1.4849250  | -0.6172026 | 0.8690810  |
| C | 3.8343932  | -0.7477476 | 0.0928480  |
| O | 4.9922272  | -0.2969323 | 0.0100283  |
| C | 0.3084279  | 0.5140817  | -0.5567188 |
| C | -1.0922900 | 0.2124539  | -0.3638870 |
| C | -1.8612221 | 0.7135169  | 0.7140438  |
| C | -3.1712459 | 0.3089792  | 0.9138016  |
| C | -3.7589426 | -0.6274656 | 0.0495388  |
| C | -3.0130462 | -1.1521707 | -1.0198393 |
| C | -1.7100358 | -0.7339728 | -1.2194863 |
| C | 3.4544657  | -2.0045334 | -0.6770437 |
| C | 1.1762776  | -2.0244847 | 0.3691018  |
| C | 2.4453139  | -2.8385613 | 0.1105752  |
| S | 0.9545294  | 2.1371974  | -0.4194750 |
| C | 0.8349725  | 2.7244139  | 1.2930192  |
| C | -0.2159424 | 3.2744738  | -1.1996521 |
| C | -5.1111206 | -1.0485451 | 0.2597870  |
| N | -6.2069303 | -1.3902727 | 0.4303745  |
| H | 3.0678959  | 0.7370578  | 1.4542982  |
| H | 0.8160711  | -0.2542066 | 1.6482595  |
| H | 0.7549688  | 0.0965497  | -1.4578154 |
| H | -1.4276289 | 1.4124687  | 1.4203553  |
| H | -3.7427404 | 0.7068819  | 1.7467463  |
| H | -3.4662827 | -1.8743956 | -1.6918767 |

|   |            |            |            |
|---|------------|------------|------------|
| H | -1.1458263 | -1.1306036 | -2.0591385 |
| H | 3.0145143  | -1.7018272 | -1.6391453 |
| H | 4.3698005  | -2.5624345 | -0.8953778 |
| H | 0.5909326  | -1.9890106 | -0.5558953 |
| H | 0.5432034  | -2.5263883 | 1.1092022  |
| H | 2.1924666  | -3.7556026 | -0.4316775 |
| H | 2.8977848  | -3.1388537 | 1.0635469  |
| H | 1.1081260  | 1.9172085  | 1.9716220  |
| H | 1.5542610  | 3.5407264  | 1.3836335  |
| H | -0.1711886 | 3.0891340  | 1.4988357  |
| H | -0.2218170 | 3.0525296  | -2.2678311 |
| H | 0.1450189  | 4.2910646  | -1.0267157 |
| H | -1.2091466 | 3.1374927  | -0.7675034 |

2a\_sy\_c\_11.log

E = -1148.926589

H = -1148.590810

G = -1148.659620

NImag=0

|   |            |            |            |
|---|------------|------------|------------|
| C | -0.3699221 | 2.0971172  | 6.6041904  |
| C | -1.0022136 | 1.3538036  | 5.4577149  |
| C | 0.0735837  | 1.5242397  | 7.7844217  |
| O | 0.6496211  | 2.1493380  | 8.7393346  |
| C | -0.0341390 | 1.1102584  | 4.2581072  |
| C | -0.7263855 | 0.7395192  | 2.9717344  |
| C | -1.7139204 | 1.5654170  | 2.4182511  |
| C | -2.3597866 | 1.2009855  | 1.2438843  |
| C | -2.0211643 | -0.0070754 | 0.6213143  |
| C | -1.0395638 | -0.8437358 | 1.1641973  |
| C | -0.3950263 | -0.4609740 | 2.3349619  |
| C | -0.1756187 | 0.0286931  | 8.0119842  |
| C | -1.5457628 | -0.0136827 | 5.9017475  |
| C | -0.5230073 | -0.7649229 | 6.7531537  |
| S | 0.9908806  | 2.6409160  | 3.9858734  |
| C | 1.7191547  | 2.3450394  | 2.3593615  |
| C | 2.4532334  | 2.3374408  | 5.0040584  |
| C | -2.6904870 | -0.3916495 | -0.5931112 |
| N | -3.2286097 | -0.7012908 | -1.5707171 |
| H | -0.2266468 | 3.1730188  | 6.4897386  |
| H | -1.8384679 | 1.9379689  | 5.0495959  |
| H | 0.7115625  | 0.3497207  | 4.5122012  |
| H | -1.9802713 | 2.5045931  | 2.8960079  |
| H | -3.1203048 | 1.8414903  | 0.8100078  |
| H | -0.7862255 | -1.7770708 | 0.6724078  |
| H | 0.3703653  | -1.1024101 | 2.7626153  |
| H | 0.7133867  | -0.3858141 | 8.5013634  |
| H | -0.9939938 | -0.0522457 | 8.7422246  |
| H | -1.8433853 | -0.6131258 | 5.0324001  |
| H | -2.4503022 | 0.1607752  | 6.4980566  |
| H | 0.3890085  | -0.9416409 | 6.1673093  |
| H | -0.9126805 | -1.7539460 | 7.0201515  |
| H | 0.9496699  | 2.4897140  | 1.6008330  |
| H | 2.5066100  | 3.0907296  | 2.2321617  |
| H | 2.1323510  | 1.3350485  | 2.3164812  |
| H | 2.1501687  | 2.4099271  | 6.0478920  |
| H | 3.1778676  | 3.1149392  | 4.7524942  |
| H | 2.8470214  | 1.3459914  | 4.7705954  |

2a\_sy\_c\_1\_r.log

E = -1148.923134

```

H =      -1148.587459
G =      -1148.655454
NImag=0
C      0.5793097      -0.8223337      1.8855036
C      1.3173665      -0.5175606      0.6073124
C      1.0573726      -0.6210982      3.1699163
O      0.4558348      -0.9588199      4.2473051
C      0.4464882      0.4447923      -0.2673168
C      0.4248293      1.8910081      0.1603704
C     -0.5880658      2.2984924      1.0362612
C     -0.6120296      3.5940525      1.5396319
C      0.3783328      4.4998625      1.1442960
C      1.3835407      4.1151415      0.2490691
C      1.4027493      2.8132219      -0.2338967
C      2.4336412      0.0287421      3.3371301
C      2.7522699      -0.0193405      0.8506151
C      2.8880368      0.8256923      2.1183086
S      0.9746864      0.3530594      -2.0445424
C     -0.3487267      1.2686165      -2.8614859
C      0.5142517      -1.3347434      -2.4864986
C      0.3553000      5.8461522      1.6510464
N      0.3366411      6.9302582      2.0580959
H     -0.3926328      -1.3067562      1.7795265
H      1.3902487      -1.4368975      0.0081038
H     -0.5768681      0.0526224      -0.2849182
H     -1.3598482      1.5933025      1.3285223
H     -1.3926344      3.9057912      2.2256391
H      2.1425501      4.8274320      -0.0567528
H      2.2028105      2.5261961      -0.9112662
H      2.3906932      0.6668979      4.2271099
H      3.1590756      -0.7678531      3.5591965
H      3.1324818      0.5251709      -0.0238676
H      3.3941996      -0.9024687      0.9622374
H      2.2836412      1.7366293      2.0404786
H      3.9303012      1.1464462      2.2332413
H     -0.2169816      2.3278963      -2.6377865
H     -0.2400305      1.0996738      -3.9343759
H     -1.3139799      0.9046947      -2.5031659
H      1.2933567      -2.0119990      -2.1386335
H      0.4622889      -1.3652291      -3.5765902
H     -0.4541606      -1.5767074      -2.0438622

```

```

2a_sy_c_1_ts1.log
E =      -1148.899474
H =      -1148.566666
G =      -1148.634534
NImag=1
C     -2.2401339      -0.6879148      -1.3008255
C     -1.1237222      -1.0915044      -0.5613571
C     -3.5847567      -0.9240257      -0.8721663
O     -4.5843120      -0.5732246      -1.5278734
C     -0.1591596      0.5107346      0.5822793
C      1.2390395      0.2625293      0.3365722
C      1.9760332      -0.5007312      1.2761249
C      3.2881224      -0.8669766      1.0390855
C      3.9214009      -0.4780073      -0.1544337
C      3.2121217      0.2754673      -1.1032325
C      1.8961839      0.6324114      -0.8635799
C     -3.7995692      -1.7071237      0.4196212
C     -1.3163170      -2.0447650      0.5924871
C     -2.5928282      -1.7065367      1.3573446

```

|   |            |            |            |
|---|------------|------------|------------|
| S | -0.8511379 | 1.9425307  | -0.1728968 |
| C | 0.0082849  | 3.3683304  | 0.5417348  |
| C | -2.4196827 | 2.0729250  | 0.7016037  |
| C | 5.2816847  | -0.8471837 | -0.4007757 |
| N | 6.3849983  | -1.1475269 | -0.6001502 |
| H | -2.1092146 | -0.1679375 | -2.2475815 |
| H | -0.1838656 | -1.1812249 | -1.1046363 |
| H | -0.4911346 | 0.4191892  | 1.6159669  |
| H | 1.4987694  | -0.7938212 | 2.2071740  |
| H | 3.8354354  | -1.4469197 | 1.7759103  |
| H | 3.6977970  | 0.5735545  | -2.0274230 |
| H | 1.3694035  | 1.2048362  | -1.6236311 |
| H | -4.6922132 | -1.3062336 | 0.9110590  |
| H | -4.0397997 | -2.7376470 | 0.1206279  |
| H | -0.4419277 | -2.0373763 | 1.2511947  |
| H | -1.3942943 | -3.0616255 | 0.1790926  |
| H | -2.4818691 | -0.7129438 | 1.8110993  |
| H | -2.7506829 | -2.4170124 | 2.1753400  |
| H | 1.0382726  | 3.3475165  | 0.1808857  |
| H | -0.4910293 | 4.2728660  | 0.1865475  |
| H | -0.0235868 | 3.3001679  | 1.6304848  |
| H | -3.0318969 | 1.2170921  | 0.4200373  |
| H | -2.8970924 | 2.9991604  | 0.3777697  |
| H | -2.2251442 | 2.0867727  | 1.7761448  |

2a\_sy\_c\_1\_ts1\_rot1.log

E = -1148.899949

H = -1148.566782

G = -1148.634443

NImag=1

|   |            |            |            |
|---|------------|------------|------------|
| C | -0.4195008 | -2.3698302 | 0.8896562  |
| C | -1.2951444 | -1.7444793 | -0.0053181 |
| C | 0.8854380  | -2.8293252 | 0.5363326  |
| O | 1.6599527  | -3.3855790 | 1.3418650  |
| C | -1.4379830 | 0.3052177  | 0.5608398  |
| C | -0.1203222 | 0.8846261  | 0.4136474  |
| C | 0.8722516  | 0.4930369  | 1.3448930  |
| C | 2.2003520  | 0.8500448  | 1.1751270  |
| C | 2.5781240  | 1.6420215  | 0.0808788  |
| C | 1.6022896  | 2.0826809  | -0.8315185 |
| C | 0.2821208  | 1.7072740  | -0.6677388 |
| C | 1.2946841  | -2.7455607 | -0.9290366 |
| C | -0.9428876 | -1.7149023 | -1.4768334 |
| C | 0.5680068  | -1.6537446 | -1.7102878 |
| S | -2.7197827 | 1.1449334  | -0.3106611 |
| C | -3.3132263 | 2.4405157  | 0.8095488  |
| C | -4.1191467 | 0.0127288  | -0.2288517 |
| C | 3.9475960  | 2.0216024  | -0.0936979 |
| N | 5.0574605  | 2.3287477  | -0.2374375 |
| H | -0.7315620 | -2.5343070 | 1.9196122  |
| H | -2.3550514 | -1.8384998 | 0.2162543  |
| H | -1.7531518 | 0.0898666  | 1.5820408  |
| H | 0.5849698  | -0.1006745 | 2.2061042  |
| H | 2.9491461  | 0.5256269  | 1.8914664  |
| H | 1.8909770  | 2.7112312  | -1.6682594 |
| H | -0.4415543 | 2.0438429  | -1.4045041 |
| H | 2.3804664  | -2.6117117 | -0.9730841 |
| H | 1.0771575  | -3.7304297 | -1.3677066 |
| H | -1.4431683 | -0.8811974 | -1.9851813 |
| H | -1.3425673 | -2.6358051 | -1.9274643 |
| H | 0.9506032  | -0.6780643 | -1.3967027 |

|   |            |            |            |
|---|------------|------------|------------|
| H | 0.7810700  | -1.7500391 | -2.7804435 |
| H | -2.4999252 | 3.1582411  | 0.9298088  |
| H | -4.1766400 | 2.9235325  | 0.3470040  |
| H | -3.5793001 | 1.9881079  | 1.7669880  |
| H | -3.9581214 | -0.7891134 | -0.9499935 |
| H | -5.0035815 | 0.5867313  | -0.5117464 |
| H | -4.2208429 | -0.3770398 | 0.7861462  |

2a\_sy\_c\_1\_ts2.log

E = -1148.908680  
H = -1148.574519  
G = -1148.642389

NImag=1

|   |            |            |            |
|---|------------|------------|------------|
| C | -2.2182228 | 1.0276322  | -0.9426473 |
| C | -2.1714642 | 0.0067287  | 0.1680920  |
| C | -2.0378300 | 2.4132704  | -0.7699593 |
| O | -2.0856489 | 3.2482992  | -1.7122707 |
| C | -0.9528319 | -0.6392586 | -0.4047833 |
| C | 0.4627778  | -0.1920539 | -0.2298086 |
| C | 1.2190117  | 0.0950456  | -1.3734976 |
| C | 2.5629513  | 0.4328866  | -1.2745838 |
| C | 3.1671590  | 0.4624832  | -0.0124538 |
| C | 2.4335709  | 0.1539572  | 1.1399409  |
| C | 1.0896958  | -0.1754381 | 1.0244544  |
| C | -1.8791849 | 2.9546737  | 0.6479941  |
| C | -2.1094235 | 0.6112513  | 1.5721837  |
| C | -1.3487501 | 1.9380583  | 1.6548996  |
| S | -0.7978595 | -2.7156646 | 0.4834872  |
| C | 0.4845480  | -3.3428186 | -0.6237577 |
| C | -2.2591921 | -3.4214205 | -0.3080074 |
| C | 4.5606993  | 0.8003935  | 0.1016642  |
| N | 5.6829080  | 1.0717821  | 0.1936814  |
| H | -2.4923797 | 0.6813726  | -1.9359645 |
| H | -3.0069351 | -0.7029138 | 0.1198780  |
| H | -1.1336661 | -1.0565320 | -1.3965730 |
| H | 0.7431265  | 0.0603347  | -2.3494041 |
| H | 3.1419881  | 0.6649808  | -2.1622133 |
| H | 2.9160712  | 0.1660894  | 2.1115232  |
| H | 0.5310610  | -0.4304210 | 1.9199762  |
| H | -1.2306823 | 3.8359547  | 0.6041931  |
| H | -2.8725745 | 3.3111556  | 0.9566974  |
| H | -1.6988330 | -0.1190050 | 2.2806190  |
| H | -3.1462319 | 0.7944180  | 1.8805597  |
| H | -0.2815807 | 1.7879664  | 1.4739207  |
| H | -1.4374075 | 2.3354891  | 2.6722510  |
| H | 1.4477174  | -2.9727303 | -0.2669473 |
| H | 0.4788695  | -4.4341738 | -0.5927934 |
| H | 0.3014347  | -2.9926968 | -1.6437551 |
| H | -3.1291877 | -3.1658842 | 0.2986207  |
| H | -2.1515222 | -4.5073904 | -0.3483834 |
| H | -2.3703846 | -3.0166379 | -1.3178578 |

2a\_sy\_c\_2.log

E = -1148.921443  
H = -1148.585409  
G = -1148.653822

NImag=0

|   |            |           |           |
|---|------------|-----------|-----------|
| C | -0.0681873 | 2.1641864 | 6.5031665 |
| C | -0.8547424 | 1.8601691 | 5.2530703 |
| C | -0.0376180 | 1.3737299 | 7.6406299 |



|   |            |            |            |
|---|------------|------------|------------|
| O | 0.6148287  | 1.6398848  | 8.7087323  |
| C | 0.0045860  | 1.2710401  | 4.0928779  |
| C | -0.7643556 | 0.9009137  | 2.8434532  |
| C | -1.6173273 | 1.8184433  | 2.2159729  |
| C | -2.3356915 | 1.4525823  | 1.0847605  |
| C | -2.2050212 | 0.1536029  | 0.5782655  |
| C | -1.3595570 | -0.7745034 | 1.1962739  |
| C | -0.6426253 | -0.3921460 | 2.3241030  |
| C | -0.8790670 | 0.0927654  | 7.6781032  |
| C | -1.9876984 | 0.8626121  | 5.5621468  |
| C | -1.4598304 | -0.3449933 | 6.3335435  |
| S | 1.4027854  | 2.3513782  | 3.5120287  |
| C | 2.7275674  | 2.1389888  | 4.7184237  |
| C | 0.8937290  | 4.0592609  | 3.7820203  |
| C | -2.9520420 | -0.2307839 | -0.5898351 |
| N | -3.5534329 | -0.5396771 | -1.5301555 |
| H | 0.5078293  | 3.0871857  | 6.5428562  |
| H | -1.3185172 | 2.7761178  | 4.8590258  |
| H | 0.5559587  | 0.3944937  | 4.4515284  |
| H | -1.7394832 | 2.8224123  | 2.6121037  |
| H | -2.9969845 | 2.1616540  | 0.5978421  |
| H | -1.2682823 | -1.7789358 | 0.7963778  |
| H | 0.0143869  | -1.1074274 | 2.8110514  |
| H | -0.2608975 | -0.6995211 | 8.1164027  |
| H | -1.6945464 | 0.2743539  | 8.3931935  |
| H | -2.5007815 | 0.5473617  | 4.6475044  |
| H | -2.7265615 | 1.3884685  | 6.1802473  |
| H | -0.6899859 | -0.8554024 | 5.7389248  |
| H | -2.2637310 | -1.0743461 | 6.4851406  |
| H | 2.9837505  | 1.0777874  | 4.7281570  |
| H | 3.5733570  | 2.7209095  | 4.3454490  |
| H | 2.4086581  | 2.4746137  | 5.7029422  |
| H | 0.0548561  | 4.2698994  | 3.1169671  |
| H | 1.7494764  | 4.6737436  | 3.4931945  |
| H | 0.6298978  | 4.2288776  | 4.8251098  |

2a\_sy\_c\_2\_r.log

E = -1148.920176

H = -1148.584224

G = -1148.650347

NImag=0

|   |            |            |            |
|---|------------|------------|------------|
| C | 2.1736510  | -0.9958060 | 0.2413450  |
| C | 0.9434504  | -0.3845043 | 0.8629977  |
| C | 2.5322606  | -2.3331332 | 0.2775757  |
| O | 3.6204130  | -2.8213258 | -0.1853738 |
| C | 0.1341918  | 0.3596500  | -0.2530690 |
| C | -0.7737783 | -0.5014119 | -1.0933787 |
| C | -2.0883387 | -0.8062646 | -0.7220677 |
| C | -2.8541855 | -1.6820182 | -1.4813262 |
| C | -2.2972833 | -2.2646285 | -2.6258311 |
| C | -0.9899557 | -1.9581314 | -3.0198359 |
| C | -0.2409531 | -1.0709677 | -2.2563072 |
| C | 1.5775106  | -3.3215091 | 0.9509429  |
| C | 0.1191892  | -1.4067661 | 1.6671805  |
| C | 0.1443271  | -2.8116105 | 1.0630301  |
| S | -0.8008738 | 1.8625402  | 0.3325208  |
| C | 0.5540461  | 3.0287075  | 0.5668406  |
| C | -1.2969876 | 1.5939970  | 2.0484188  |
| C | -3.0837966 | -3.1766844 | -3.4128661 |
| N | -3.7175255 | -3.9105822 | -4.0462330 |
| H | 2.8701397  | -0.3003557 | -0.2300187 |

|   |            |            |            |
|---|------------|------------|------------|
| H | 1.2502228  | 0.4096718  | 1.5594867  |
| H | 0.8616540  | 0.8468009  | -0.9116986 |
| H | -2.5344792 | -0.3801859 | 0.1726023  |
| H | -3.8720774 | -1.9179877 | -1.1899389 |
| H | -0.5721341 | -2.4044285 | -3.9161446 |
| H | 0.7701081  | -0.8202409 | -2.5615151 |
| H | 1.6169716  | -4.2574277 | 0.3819091  |
| H | 1.9755354  | -3.5479668 | 1.9511532  |
| H | -0.9153066 | -1.0697795 | 1.7960692  |
| H | 0.5529318  | -1.4590194 | 2.6745869  |
| H | -0.3171484 | -2.8077034 | 0.0684351  |
| H | -0.4563581 | -3.4847011 | 1.6863425  |
| H | 0.9463208  | 3.2784560  | -0.4199140 |
| H | 0.1311675  | 3.9187428  | 1.0365665  |
| H | 1.3261258  | 2.5864654  | 1.1988061  |
| H | -2.1274726 | 0.8881809  | 2.0704827  |
| H | -1.6388531 | 2.5680586  | 2.4054584  |
| H | -0.4547938 | 1.2431412  | 2.6457011  |

2a\_sy\_c\_2\_ts1.log

E = -1148.893432

H = -1148.560378

G = -1148.627927

NImag=1

|   |            |            |            |
|---|------------|------------|------------|
| C | -2.8144514 | -0.3460521 | -0.7680793 |
| C | -1.4496029 | -0.4233064 | -1.0530501 |
| C | -3.5368046 | -1.3972752 | -0.1164660 |
| O | -4.7507704 | -1.3211191 | 0.1523131  |
| C | -0.3019309 | 0.6770354  | 0.4709068  |
| C | 1.1109115  | 0.3953133  | 0.3620772  |
| C | 1.9436616  | 1.0528574  | -0.5755710 |
| C | 3.2750112  | 0.7021079  | -0.7281208 |
| C | 3.8209090  | -0.3341553 | 0.0453586  |
| C | 3.0115561  | -1.0083462 | 0.9787453  |
| C | 1.6871151  | -0.6462716 | 1.1322768  |
| C | -2.8017250 | -2.6978690 | 0.1861231  |
| C | -0.7657480 | -1.7635357 | -0.9402657 |
| C | -1.2841492 | -2.5428516 | 0.2648463  |
| S | -0.6927975 | 2.4064143  | 0.3773761  |
| C | -2.1717552 | 2.5110131  | 1.4026753  |
| C | -1.4040931 | 2.8035860  | -1.2448374 |
| C | 5.1937336  | -0.7035589 | -0.1148569 |
| N | 6.3075920  | -1.0036360 | -0.2442234 |
| H | -3.3887534 | 0.5444030  | -1.0113930 |
| H | -1.0401905 | 0.2430697  | -1.8103401 |
| H | -0.8123238 | 0.2567655  | 1.3341587  |
| H | 1.5405516  | 1.8410008  | -1.2075320 |
| H | 3.8966918  | 1.2199344  | -1.4521555 |
| H | 3.4351919  | -1.8047791 | 1.5829538  |
| H | 1.0719650  | -1.1640018 | 1.8629811  |
| H | -3.2159095 | -3.1146997 | 1.1094987  |
| H | -3.0623021 | -3.3960599 | -0.6225875 |
| H | 0.3205432  | -1.6501497 | -0.9081870 |
| H | -0.9942896 | -2.3217273 | -1.8608383 |
| H | -1.0192333 | -2.0040651 | 1.1831971  |
| H | -0.8040767 | -3.5254815 | 0.3209658  |
| H | -1.8659348 | 2.3479496  | 2.4368607  |
| H | -2.5852117 | 3.5142435  | 1.2848063  |
| H | -2.8843033 | 1.7502037  | 1.0790267  |
| H | -0.6495889 | 2.5924685  | -2.0043735 |
| H | -1.6076551 | 3.8766237  | -1.2220224 |

H -2.3197784 2.2438461 -1.4288177

2a\_sy\_c\_2\_ts2.log

E = -1148.905568

H = -1148.571121

G = -1148.638389

NImag=1

|   |            |            |            |
|---|------------|------------|------------|
| C | -1.5869383 | 1.8114931  | -0.8007265 |
| C | -1.8936245 | 0.6725863  | 0.1416609  |
| C | -0.8685953 | 2.9721793  | -0.4627735 |
| O | -0.6202709 | 3.9032869  | -1.2760537 |
| C | -1.0206793 | -0.2741427 | -0.6249294 |
| C | 0.4607191  | -0.3981120 | -0.4387335 |
| C | 1.0090708  | -0.9664810 | 0.7184933  |
| C | 2.3838175  | -1.0894138 | 0.8657884  |
| C | 3.2253732  | -0.6426931 | -0.1605625 |
| C | 2.6945856  | -0.0895926 | -1.3314258 |
| C | 1.3153265  | 0.0189301  | -1.4659015 |
| C | -0.4532134 | 3.1744103  | 0.9909028  |
| C | -1.5472410 | 0.9739260  | 1.6036985  |
| C | -0.3290236 | 1.8834377  | 1.7941342  |
| S | -1.6828432 | -2.4186179 | -0.2269027 |
| C | -3.1217663 | -2.3828958 | -1.3167570 |
| C | -2.5134549 | -2.3763044 | 1.3780994  |
| C | 4.6511808  | -0.7647579 | -0.0128254 |
| N | 5.7990309  | -0.8632168 | 0.1064436  |
| H | -1.9997725 | 1.7576557  | -1.8050561 |
| H | -2.9387583 | 0.3482118  | 0.0741644  |
| H | -1.3306108 | -0.3829268 | -1.6634561 |
| H | 0.3614740  | -1.3108794 | 1.5204069  |
| H | 2.8056022  | -1.5268829 | 1.7643954  |
| H | 3.3550475  | 0.2469252  | -2.1235919 |
| H | 0.8948362  | 0.4464588  | -2.3711615 |
| H | 0.4878026  | 3.7344915  | 1.0008554  |
| H | -1.2127255 | 3.8289893  | 1.4424276  |
| H | -1.4160061 | 0.0427760  | 2.1655289  |
| H | -2.4218697 | 1.4779451  | 2.0340268  |
| H | 0.5889696  | 1.3688426  | 1.4982943  |
| H | -0.2245340 | 2.1134026  | 2.8605168  |
| H | -2.7597396 | -2.4076069 | -2.3461538 |
| H | -3.7357472 | -3.2655960 | -1.1262041 |
| H | -3.7041587 | -1.4742029 | -1.1448913 |
| H | -1.7508830 | -2.3219702 | 2.1573472  |
| H | -3.0819542 | -3.3020069 | 1.4930648  |
| H | -3.1830483 | -1.5160592 | 1.4401027  |

2a\_sy\_c\_3.log

E = -1148.925093

H = -1148.589305

G = -1148.656159

NImag=0

|   |            |           |           |
|---|------------|-----------|-----------|
| C | -1.1566765 | 1.8499804 | 6.1174168 |
| C | -1.1968286 | 0.4701344 | 5.5065555 |
| C | -0.4634871 | 2.1752769 | 7.2725005 |
| O | -0.4012859 | 3.3390042 | 7.7960606 |
| C | -0.2596781 | 0.3008958 | 4.2613038 |
| C | -0.9116902 | 0.4868250 | 2.9163956 |
| C | -1.8949789 | 1.4657375 | 2.7149872 |
| C | -2.4910468 | 1.6227190 | 1.4709317 |
| C | -2.1044934 | 0.7885714 | 0.4138720 |

|   |            |            |            |
|---|------------|------------|------------|
| C | -1.1309318 | -0.1981397 | 0.5987217  |
| C | -0.5416314 | -0.3411970 | 1.8500364  |
| C | 0.2715462  | 1.0656540  | 8.0377539  |
| C | -0.8818925 | -0.6095655 | 6.5523813  |
| C | 0.3937997  | -0.2843788 | 7.3247920  |
| S | 1.1980881  | 1.4432951  | 4.4748322  |
| C | 0.7929574  | 2.9907127  | 3.6440085  |
| C | 2.3573595  | 0.7639450  | 3.2649434  |
| C | -2.7225422 | 0.9440611  | -0.8763791 |
| N | -3.2189367 | 1.0695109  | -1.9151321 |
| H | -1.6913721 | 2.6546555  | 5.6132240  |
| H | -2.2002461 | 0.2609736  | 5.1129716  |
| H | 0.2364597  | -0.6778864 | 4.2742776  |
| H | -2.1994231 | 2.1118494  | 3.5329859  |
| H | -3.2513090 | 2.3807300  | 1.3145173  |
| H | -0.8458748 | -0.8449160 | -0.2242826 |
| H | 0.2083657  | -1.1124690 | 2.0036900  |
| H | 1.2609803  | 1.4537173  | 8.3084880  |
| H | -0.2719419 | 0.9350807  | 8.9844491  |
| H | -0.8051361 | -1.5919324 | 6.0711159  |
| H | -1.7243812 | -0.6554521 | 7.2540122  |
| H | 1.2494442  | -0.2755367 | 6.6358552  |
| H | 0.6059747  | -1.0772420 | 8.0511082  |
| H | -0.0193258 | 3.4649420  | 4.1934031  |
| H | 1.6961501  | 3.6027933  | 3.7011688  |
| H | 0.5245097  | 2.8015044  | 2.6034426  |
| H | 2.6104804  | -0.2515412 | 3.5750705  |
| H | 3.2497746  | 1.3921270  | 3.2970725  |
| H | 1.9220200  | 0.7733601  | 2.2638482  |

2a\_sy\_c\_3\_r.log

E = -1148.917886

H = -1148.581593

G = -1148.647668

NImag=0

|   |            |            |            |
|---|------------|------------|------------|
| C | -0.0929033 | -2.1141182 | -0.5184608 |
| C | 1.0409150  | -1.1336722 | -0.6929308 |
| C | -0.0838254 | -3.2396897 | 0.2898588  |
| O | -1.0130294 | -4.1160008 | 0.3526339  |
| C | 0.4691688  | 0.3018097  | -0.4958737 |
| C | 0.0217496  | 0.7717505  | 0.8644998  |
| C | 0.8933991  | 0.8950386  | 1.9555239  |
| C | 0.4263069  | 1.3233340  | 3.1917595  |
| C | -0.9301197 | 1.6329120  | 3.3454009  |
| C | -1.8154791 | 1.5189887  | 2.2691687  |
| C | -1.3305859 | 1.0947402  | 1.0375715  |
| C | 1.1442984  | -3.4863282 | 1.1694071  |
| C | 2.2846136  | -1.5116831 | 0.1326898  |
| C | 1.9549054  | -2.2244377 | 1.4449159  |
| S | 1.5537859  | 1.5521968  | -1.3759378 |
| C | 2.6927801  | 2.3135313  | -0.2032938 |
| C | 0.3990296  | 2.9173564  | -1.6101427 |
| C | -1.4173087 | 2.0773034  | 4.6243674  |
| N | -1.8091816 | 2.4362735  | 5.6532498  |
| H | -0.9600578 | -1.9670266 | -1.1645586 |
| H | 1.3596289  | -1.1220461 | -1.7481589 |
| H | -0.3958606 | 0.3555228  | -1.1684035 |
| H | 1.9459189  | 0.6534290  | 1.8551166  |
| H | 1.1045115  | 1.4160210  | 4.0334175  |
| H | -2.8653451 | 1.7606699  | 2.3967390  |
| H | -2.0142607 | 1.0072979  | 0.1978639  |

|   |            |            |            |
|---|------------|------------|------------|
| H | 0.7946143  | -3.9387393 | 2.1042887  |
| H | 1.7743499  | -4.2394009 | 0.6733636  |
| H | 2.9267522  | -0.6398921 | 0.3078583  |
| H | 2.8795584  | -2.2027880 | -0.4780769 |
| H | 1.3768606  | -1.5716959 | 2.1073217  |
| H | 2.8855410  | -2.4684439 | 1.9709787  |
| H | 3.3810096  | 1.5548484  | 0.1699373  |
| H | 3.2487353  | 3.0565929  | -0.7797882 |
| H | 2.1413527  | 2.7930529  | 0.6064664  |
| H | -0.3855357 | 2.5770399  | -2.2877865 |
| H | 0.9570136  | 3.7372433  | -2.0664099 |
| H | -0.0139011 | 3.2196111  | -0.6453636 |

2a\_sy\_c\_3\_ts1.log

E = -1148.896107  
H = -1148.562624  
G = -1148.630074

NImag=1

|   |            |            |            |
|---|------------|------------|------------|
| C | 2.7886824  | -0.1302909 | 0.9681289  |
| C | 1.4877927  | -0.6336082 | 0.8904054  |
| C | 3.9123155  | -0.7638953 | 0.3467846  |
| O | 5.0701511  | -0.3091799 | 0.4091461  |
| C | 0.2717597  | 0.4374529  | -0.5863820 |
| C | -1.1276642 | 0.1645357  | -0.3525113 |
| C | -1.8901005 | 0.7633203  | 0.6788560  |
| C | -3.2035481 | 0.3886591  | 0.9145265  |
| C | -3.8022734 | -0.6117245 | 0.1346647  |
| C | -3.0627266 | -1.2338802 | -0.8866693 |
| C | -1.7562367 | -0.8482593 | -1.1211480 |
| C | 3.6895889  | -2.1048161 | -0.3423123 |
| C | 1.2758774  | -2.0263790 | 0.3490213  |
| C | 2.2470806  | -2.3348755 | -0.7872077 |
| S | 0.9457761  | 2.0511297  | -0.5194799 |
| C | 0.8332125  | 2.7080308  | 1.1702731  |
| C | -0.2032532 | 3.1748747  | -1.3506776 |
| C | -5.1581111 | -0.9995783 | 0.3810949  |
| N | -6.2570963 | -1.3146536 | 0.5804926  |
| H | 2.9947301  | 0.7901913  | 1.5114010  |
| H | 0.7666118  | -0.3120159 | 1.6419429  |
| H | 0.6883866  | -0.0192837 | -1.4817823 |
| H | -1.4534831 | 1.5233190  | 1.3168154  |
| H | -3.7697250 | 0.8635239  | 1.7098768  |
| H | -3.5232696 | -2.0075806 | -1.4932104 |
| H | -1.1943616 | -1.3254944 | -1.9199190 |
| H | 4.3881780  | -2.1754453 | -1.1818478 |
| H | 3.9839244  | -2.8781178 | 0.3820756  |
| H | 0.2376849  | -2.1663673 | 0.0337933  |
| H | 1.4493019  | -2.7288199 | 1.1781494  |
| H | 2.0225186  | -1.6852243 | -1.6425800 |
| H | 2.1161051  | -3.3669310 | -1.1285398 |
| H | 0.9858922  | 1.8987041  | 1.8831913  |
| H | 1.6320562  | 3.4451705  | 1.2690143  |
| H | -0.1357421 | 3.1839196  | 1.3223399  |
| H | -0.2104341 | 2.9080134  | -2.4085014 |
| H | 0.1753638  | 4.1913071  | -1.2203240 |
| H | -1.1998780 | 3.0747409  | -0.9164969 |

2a\_sy\_c\_3\_ts2.log

E = -1148.905715  
H = -1148.571199

G = -1148.638639  
NImag=1

|   |            |            |            |
|---|------------|------------|------------|
| C | 2.5678574  | -0.3489705 | -1.0304433 |
| C | 2.1502242  | 0.7259662  | -0.0574051 |
| C | 2.9334044  | -1.6621523 | -0.6804526 |
| O | 3.3045087  | -2.5323223 | -1.5136040 |
| C | 0.7868484  | 0.8635340  | -0.6604988 |
| C | -0.4228979 | 0.0401853  | -0.3986831 |
| C | -0.9358151 | -0.1769548 | 0.8892638  |
| C | -2.1191604 | -0.8807263 | 1.0713476  |
| C | -2.8063022 | -1.3734063 | -0.0445361 |
| C | -2.3196769 | -1.1545694 | -1.3389430 |
| C | -1.1408054 | -0.4408609 | -1.5048509 |
| C | 2.9792130  | -2.0320608 | 0.7986353  |
| C | 2.2951451  | 0.3197878  | 1.4122685  |
| C | 2.0760561  | -1.1727697 | 1.6770754  |
| S | 0.0677135  | 2.9801914  | -0.1540420 |
| C | -0.6651493 | 3.0359238  | 1.4953806  |
| C | -1.4365319 | 3.0229688  | -1.1511759 |
| C | -4.0318086 | -2.1031145 | 0.1415323  |
| N | -5.0188301 | -2.6903005 | 0.2912689  |
| H | 2.6927914  | -0.0619242 | -2.0717568 |
| H | 2.6885622  | 1.6695921  | -0.2175345 |
| H | 0.8474680  | 1.1745521  | -1.7034048 |
| H | -0.4205092 | 0.2139182  | 1.7596227  |
| H | -2.5132827 | -1.0442506 | 2.0688330  |
| H | -2.8630333 | -1.5345408 | -2.1975824 |
| H | -0.7606713 | -0.2577568 | -2.5060050 |
| H | 2.7222648  | -3.0925195 | 0.8911944  |
| H | 4.0269094  | -1.9324409 | 1.1172493  |
| H | 1.6403804  | 0.9334680  | 2.0432192  |
| H | 3.3236535  | 0.5654670  | 1.7046547  |
| H | 1.0374596  | -1.4567905 | 1.4885653  |
| H | 2.2689034  | -1.3799870 | 2.7357035  |
| H | 0.1183370  | 2.8304770  | 2.2268460  |
| H | -1.0640515 | 4.0397303  | 1.6603203  |
| H | -1.4678255 | 2.3001000  | 1.5783649  |
| H | -1.1519058 | 2.8912908  | -2.1972851 |
| H | -1.9202464 | 3.9938435  | -1.0246062 |
| H | -2.1131722 | 2.2221519  | -0.8406221 |

2a\_sy\_c\_4.log  
E = -1148.927681  
H = -1148.591490  
G = -1148.658100  
NImag=0

|   |            |            |           |
|---|------------|------------|-----------|
| C | -0.0609164 | 2.0605921  | 6.6182832 |
| C | -0.8863728 | 1.6808975  | 5.4143000 |
| C | 0.0150540  | 1.3373043  | 7.7987704 |
| O | 0.6808150  | 1.6773765  | 8.8354056 |
| C | -0.0349122 | 1.1274090  | 4.2320766 |
| C | -0.7603486 | 0.8978665  | 2.9320371 |
| C | -1.6640873 | 1.8344070  | 2.4112581 |
| C | -2.3247317 | 1.5879396  | 1.2136056 |
| C | -2.0860187 | 0.3904259  | 0.5296382 |
| C | -1.1945609 | -0.5599897 | 1.0401604 |
| C | -0.5385368 | -0.2977207 | 2.2364706 |
| C | -0.7953058 | 0.0418885  | 7.9217257 |
| C | -1.9476027 | 0.6256545  | 5.7708942 |
| C | -1.3470523 | -0.5034409 | 6.6056016 |
| S | 1.4579615  | 2.2109978  | 4.0228995 |

|   |            |            |            |
|---|------------|------------|------------|
| C | 0.8044333  | 3.8410171  | 3.6217078  |
| C | 2.1190068  | 1.7144826  | 2.4212115  |
| C | -2.7699494 | 0.1320424  | -0.7096444 |
| N | -3.3199674 | -0.0750771 | -1.7074991 |
| H | 0.4864654  | 3.0039982  | 6.5838663  |
| H | -1.4128935 | 2.5646219  | 5.0281757  |
| H | 0.4484149  | 0.1955982  | 4.5487903  |
| H | -1.8699208 | 2.7601269  | 2.9387486  |
| H | -3.0237309 | 2.3134918  | 0.8112337  |
| H | -1.0212577 | -1.4879365 | 0.5053836  |
| H | 0.1539961  | -1.0316507 | 2.6393144  |
| H | -0.1597148 | -0.7003154 | 8.4186322  |
| H | -1.6235833 | 0.2493717  | 8.6148538  |
| H | -2.4238897 | 0.2322989  | 4.8651903  |
| H | -2.7310537 | 1.1244049  | 6.3556314  |
| H | -0.5445899 | -0.9972875 | 6.0413732  |
| H | -2.1055114 | -1.2709285 | 6.7979323  |
| H | 0.2308351  | 4.1998873  | 4.4776017  |
| H | 1.6710365  | 4.4861257  | 3.4630859  |
| H | 0.1936429  | 3.7950576  | 2.7188379  |
| H | 2.4079553  | 0.6638039  | 2.4903102  |
| H | 3.0047041  | 2.3290337  | 2.2475589  |
| H | 1.3784880  | 1.8701250  | 1.6347771  |

2a\_sy\_c\_5.log

E = -1148.925303

H = -1148.589480

G = -1148.656483

NImag=0

|   |            |            |            |
|---|------------|------------|------------|
| C | -0.9242131 | 1.8211136  | 5.9910981  |
| C | -0.6481889 | 0.4968461  | 5.3114693  |
| C | -0.8013657 | 2.0613027  | 7.3517233  |
| O | -1.0337321 | 3.1766756  | 7.9302869  |
| C | 0.1341143  | 0.6266212  | 3.9689497  |
| C | -0.7183181 | 0.6381984  | 2.7211942  |
| C | -0.3814165 | -0.1991307 | 1.6526396  |
| C | -1.1515665 | -0.2170075 | 0.4950344  |
| C | -2.2686098 | 0.6203411  | 0.4069718  |
| C | -2.6189152 | 1.4643880  | 1.4684095  |
| C | -1.8434223 | 1.4667944  | 2.6203796  |
| C | -0.3405335 | 0.9131731  | 8.2565211  |
| C | 0.0926502  | -0.4819775 | 6.2345581  |
| C | -0.5151190 | -0.4689475 | 7.6318361  |
| S | 1.1211423  | 2.1971343  | 3.9617868  |
| C | 2.0958260  | 1.9723955  | 2.4558065  |
| C | 2.4119126  | 1.9036296  | 5.1873471  |
| C | -3.0703452 | 0.6134514  | -0.7881151 |
| N | -3.7147786 | 0.6082990  | -1.7502817 |
| H | -1.3346906 | 2.6320595  | 5.3901704  |
| H | -1.5875603 | 0.0002866  | 5.0128884  |
| H | 0.8856709  | -0.1662654 | 3.8760803  |
| H | 0.4884996  | -0.8453063 | 1.7283315  |
| H | -0.8925115 | -0.8695124 | -0.3320748 |
| H | -3.4898005 | 2.1062910  | 1.3881983  |
| H | -2.1233372 | 2.1158426  | 3.4447078  |
| H | 0.7179624  | 1.0773308  | 8.5090284  |
| H | -0.8997591 | 0.9974819  | 9.1952140  |
| H | 1.1511460  | -0.2003860 | 6.3094858  |
| H | 0.0590660  | -1.4857649 | 5.7942103  |
| H | -0.0493512 | -1.2390431 | 8.2574060  |
| H | -1.5843034 | -0.7137658 | 7.5647925  |

|   |           |           |           |
|---|-----------|-----------|-----------|
| H | 1.4406482 | 2.1304787 | 1.5983564 |
| H | 2.8732932 | 2.7391730 | 2.4683899 |
| H | 2.5377412 | 0.9740214 | 2.4370547 |
| H | 1.9542383 | 1.9793507 | 6.1734685 |
| H | 3.1520912 | 2.6950237 | 5.0507075 |
| H | 2.8596362 | 0.9219033 | 5.0208685 |

2a\_sy\_c\_5\_r.log

E = -1148.924186  
H = -1148.588407  
G = -1148.656302

NImag=0

|   |            |            |            |
|---|------------|------------|------------|
| C | -0.6103672 | -1.7959147 | -0.0356493 |
| C | -1.2813310 | -0.5847314 | 0.5716426  |
| C | -1.2400925 | -2.7384428 | -0.8296817 |
| O | -0.6834284 | -3.7639534 | -1.3558598 |
| C | -0.2770076 | 0.5984478  | 0.5389113  |
| C | 0.2042884  | 1.0437606  | -0.8235997 |
| C | 1.4850311  | 0.6536774  | -1.2329324 |
| C | 1.9703811  | 1.0067504  | -2.4856746 |
| C | 1.1684954  | 1.7756755  | -3.3370797 |
| C | -0.1056316 | 2.1912343  | -2.9366154 |
| C | -0.5804800 | 1.8234178  | -1.6826555 |
| C | -2.7365171 | -2.5632966 | -1.1187736 |
| C | -2.6216144 | -0.2824630 | -0.1002067 |
| C | -3.4402369 | -1.5675759 | -0.1986162 |
| S | -0.9733185 | 2.0840311  | 1.3969191  |
| C | 0.5213007  | 3.0589354  | 1.6589398  |
| C | -1.2796063 | 1.4775608  | 3.0665896  |
| C | 1.6640182  | 2.1522326  | -4.6344260 |
| N | 2.0625921  | 2.4556962  | -5.6785589 |
| H | 0.4413931  | -1.9561627 | 0.2047841  |
| H | -1.4829231 | -0.7472754 | 1.6440233  |
| H | 0.5898689  | 0.3230582  | 1.1513969  |
| H | 2.1059705  | 0.0654858  | -0.5638268 |
| H | 2.9606309  | 0.6965374  | -2.8021828 |
| H | -0.7156101 | 2.7949104  | -3.6002009 |
| H | -1.5703340 | 2.1573949  | -1.3858122 |
| H | -2.8443572 | -2.2463623 | -2.1662593 |
| H | -3.1980698 | -3.5550927 | -1.0478260 |
| H | -2.4564684 | 0.0993269  | -1.1155815 |
| H | -3.1741196 | 0.4861745  | 0.4577427  |
| H | -4.4491057 | -1.3487459 | -0.5661193 |
| H | -3.5514561 | -2.0006802 | 0.8050947  |
| H | 0.8591506  | 3.4180515  | 0.6854403  |
| H | 0.2485990  | 3.9048612  | 2.2924243  |
| H | 1.2815856  | 2.4380721  | 2.1371549  |
| H | -2.2140305 | 0.9156625  | 3.0615359  |
| H | -1.3839055 | 2.3593399  | 3.7023799  |
| H | -0.4419530 | 0.8580053  | 3.3933422  |

2a\_sy\_c\_5\_ts1.log

E = -1148.894081  
H = -1148.561051  
G = -1148.629270

NImag=1

|   |            |            |            |
|---|------------|------------|------------|
| C | -1.8478431 | -0.9615970 | -1.0637918 |
| C | -1.1420860 | -1.1326784 | 0.1337060  |
| C | -3.2763681 | -0.9631888 | -1.1399285 |
| O | -3.9135612 | -0.7164921 | -2.1825329 |



|   |            |            |            |
|---|------------|------------|------------|
| C | -0.0619808 | 0.6600892  | 0.7537677  |
| C | 1.3070751  | 0.3423235  | 0.4289100  |
| C | 2.0939580  | -0.3187162 | 1.4043931  |
| C | 3.3754831  | -0.7549693 | 1.1246194  |
| C | 3.9230963  | -0.5483495 | -0.1539836 |
| C | 3.1582991  | 0.0909752  | -1.1417147 |
| C | 1.8733130  | 0.5224312  | -0.8563317 |
| C | -4.0496875 | -1.3751813 | 0.1122045  |
| C | -1.9184206 | -1.4335887 | 1.4063970  |
| C | -3.2056544 | -2.1956546 | 1.0862175  |
| S | -0.8133479 | 1.9171975  | -0.2152997 |
| C | -0.0127660 | 3.4706667  | 0.2593466  |
| C | -2.3967386 | 2.1155488  | 0.6131355  |
| C | 5.2523475  | -0.9896091 | -0.4477424 |
| N | 6.3305184  | -1.3480819 | -0.6845698 |
| H | -1.3053167 | -0.8570926 | -2.0018489 |
| H | -0.1526626 | -1.5783146 | 0.0603228  |
| H | -0.2948257 | 0.7774319  | 1.8117029  |
| H | 1.6779289  | -0.4795620 | 2.3954022  |
| H | 3.9631041  | -1.2530515 | 1.8896717  |
| H | 3.5760982  | 0.2451038  | -2.1318625 |
| H | 1.3057757  | 1.0071476  | -1.6467223 |
| H | -4.4120438 | -0.4654666 | 0.6135646  |
| H | -4.9364365 | -1.9230170 | -0.2223082 |
| H | -2.1996649 | -0.5002386 | 1.9082574  |
| H | -1.2833615 | -1.9882987 | 2.1045204  |
| H | -3.7650364 | -2.3890572 | 2.0078761  |
| H | -2.9649679 | -3.1679610 | 0.6393479  |
| H | 1.0215443  | 3.4229887  | -0.0865593 |
| H | -0.5357008 | 4.2867150  | -0.2445814 |
| H | -0.0540836 | 3.5843737  | 1.3439042  |
| H | -2.9914012 | 1.2255803  | 0.4121034  |
| H | -2.8823050 | 2.9919844  | 0.1808840  |
| H | -2.2296480 | 2.2488564  | 1.6840059  |

2a\_sy\_c\_5\_ts2.log

E = -1148.908244

H = -1148.574162

G = -1148.642383

NImag=1

|   |            |            |            |
|---|------------|------------|------------|
| C | -2.2302794 | -0.6512024 | 1.1075459  |
| C | -2.2006532 | 0.4282170  | 0.0489486  |
| C | -1.8777171 | -1.9836961 | 0.8432269  |
| O | -1.7378324 | -2.8810118 | 1.7189845  |
| C | -0.8385129 | 0.8815001  | 0.4782117  |
| C | 0.4310387  | 0.1223003  | 0.2143763  |
| C | 1.1174134  | -0.4146107 | 1.3134010  |
| C | 2.3097577  | -1.1046659 | 1.1473730  |
| C | 2.8436346  | -1.2459215 | -0.1401920 |
| C | 2.1924805  | -0.6899228 | -1.2453898 |
| C | 0.9951193  | -0.0059970 | -1.0624518 |
| C | -1.7088555 | -2.3627240 | -0.6267680 |
| C | -2.3761570 | -0.0491507 | -1.4086027 |
| C | -2.6471139 | -1.5521041 | -1.5228448 |
| S | -0.3748952 | 2.8268827  | -0.4710732 |
| C | 1.0364406  | 3.2641753  | 0.5678648  |
| C | -1.6724286 | 3.7847613  | 0.3397218  |
| C | 4.0802079  | -1.9571613 | -0.3242027 |
| N | 5.0762838  | -2.5296087 | -0.4715868 |
| H | -2.4363678 | -0.3552779 | 2.1328556  |
| H | -2.9196290 | 1.2195295  | 0.2825075  |

|   |            |            |            |
|---|------------|------------|------------|
| H | -0.8484530 | 1.3176359  | 1.4788558  |
| H | 0.6963905  | -0.3037750 | 2.3083836  |
| H | 2.8268599  | -1.5283427 | 2.0018863  |
| H | 2.6221902  | -0.7877110 | -2.2368145 |
| H | 0.5202425  | 0.4389374  | -1.9298456 |
| H | -0.6638521 | -2.2012578 | -0.9294511 |
| H | -1.9062852 | -3.4360512 | -0.7138034 |
| H | -1.4897390 | 0.1967743  | -1.9989886 |
| H | -3.2025273 | 0.5073284  | -1.8616690 |
| H | -2.5481316 | -1.8617745 | -2.5692663 |
| H | -3.6817850 | -1.7616218 | -1.2249590 |
| H | 1.9093386  | 2.7284577  | 0.1901083  |
| H | 1.2093262  | 4.3398427  | 0.4979103  |
| H | 0.8377596  | 2.9784227  | 1.6046904  |
| H | -2.5996432 | 3.6320732  | -0.2147826 |
| H | -1.4014636 | 4.8419972  | 0.3097043  |
| H | -1.7910548 | 3.4540511  | 1.3754014  |

2a\_sy\_c\_6.log

E = -1148.917717  
H = -1148.581746  
G = -1148.648975

NImag=0

|   |            |            |            |
|---|------------|------------|------------|
| C | -0.8508452 | 1.8451888  | 5.8216966  |
| C | -0.7109166 | 0.4163931  | 5.3502793  |
| C | -0.6755426 | 2.2772059  | 7.1240169  |
| O | -0.7495652 | 3.4930741  | 7.5210225  |
| C | 0.0373042  | 0.2291850  | 4.0093263  |
| C | -0.7773152 | 0.4173547  | 2.7413775  |
| C | -1.9668482 | 1.1537550  | 2.7333394  |
| C | -2.6888231 | 1.3142827  | 1.5556500  |
| C | -2.2159680 | 0.7349931  | 0.3735793  |
| C | -1.0320392 | -0.0118846 | 0.3666770  |
| C | -0.3235802 | -0.1665145 | 1.5509807  |
| C | -0.3523768 | 1.2341280  | 8.1991077  |
| C | -0.1004629 | -0.5004565 | 6.4226653  |
| C | -0.6989571 | -0.1956015 | 7.7906090  |
| S | 1.5813191  | 1.2443482  | 3.7169854  |
| C | 2.4934005  | 1.3622498  | 5.2679930  |
| C | 1.0886354  | 2.9639986  | 3.4720831  |
| C | -2.9584646 | 0.9026730  | -0.8477482 |
| N | -3.5549024 | 1.0378576  | -1.8311118 |
| H | -1.1250689 | 2.6017130  | 5.0888617  |
| H | -1.6984764 | -0.0228909 | 5.1145837  |
| H | 0.4690022  | -0.7798135 | 3.9753798  |
| H | -2.3427228 | 1.6035748  | 3.6459327  |
| H | -3.6119560 | 1.8841914  | 1.5510900  |
| H | -0.6798819 | -0.4678850 | -0.5525629 |
| H | 0.5885731  | -0.7576332 | 1.5496826  |
| H | 0.7204391  | 1.3042584  | 8.4361489  |
| H | -0.8897264 | 1.5270848  | 9.1084228  |
| H | 0.9854551  | -0.3618663 | 6.4801322  |
| H | -0.2727242 | -1.5454565 | 6.1384876  |
| H | -0.3308809 | -0.9120065 | 8.5340955  |
| H | -1.7904483 | -0.3141688 | 7.7438884  |
| H | 2.8840747  | 0.3731764  | 5.5090919  |
| H | 3.3215845  | 2.0452123  | 5.0633513  |
| H | 1.8400263  | 1.7519427  | 6.0494917  |
| H | 0.2597987  | 2.9865365  | 2.7619523  |
| H | 1.9586414  | 3.4582955  | 3.0343102  |
| H | 0.8091388  | 3.4128041  | 4.4232309  |

2a\_sy\_c\_6\_ts1.log

E = -1148.885578  
H = -1148.552370  
G = -1148.619405

NImag=1

|   |            |            |            |
|---|------------|------------|------------|
| C | 1.7547173  | -0.7935901 | 1.2435310  |
| C | 1.0783080  | -1.2189056 | 0.0985101  |
| C | 3.1689308  | -0.6152968 | 1.2821871  |
| O | 3.7568968  | 0.0145269  | 2.1863814  |
| C | 0.0319372  | 0.3891422  | -0.9047714 |
| C | -1.3634492 | 0.2375960  | -0.5594903 |
| C | -2.0456886 | 1.0437966  | 0.3819222  |
| C | -3.3581296 | 0.7787671  | 0.7393288  |
| C | -4.0331400 | -0.3164425 | 0.1798369  |
| C | -3.3716381 | -1.1428112 | -0.7463080 |
| C | -2.0653678 | -0.8683456 | -1.1036347 |
| C | 3.9905521  | -1.2594267 | 0.1714661  |
| C | 1.8884085  | -1.8118269 | -1.0504204 |
| C | 3.2254387  | -2.3641449 | -0.5538314 |
| S | 0.6757883  | 2.0363735  | -0.7138206 |
| C | 2.2232945  | 1.9270496  | -1.6289907 |
| C | 1.3359454  | 2.2874551  | 0.9679226  |
| C | -5.3868798 | -0.5934294 | 0.5521533  |
| N | -6.4850487 | -0.8187169 | 0.8527096  |
| H | 1.1894322  | -0.4580204 | 2.1107329  |
| H | 0.0827480  | -1.6359510 | 0.2376752  |
| H | 0.2954371  | 0.0653397  | -1.9098067 |
| H | -1.5578472 | 1.9004985  | 0.8390749  |
| H | -3.8661274 | 1.4178642  | 1.4549097  |
| H | -3.8921075 | -1.9905446 | -1.1812881 |
| H | -1.5630095 | -1.5070104 | -1.8258545 |
| H | 4.2774319  | -0.4740011 | -0.5434534 |
| H | 4.9181257  | -1.6288966 | 0.6212259  |
| H | 2.1066235  | -1.0480710 | -1.8046568 |
| H | 1.2984967  | -2.5863878 | -1.5516395 |
| H | 3.8088743  | -2.7430356 | -1.3998416 |
| H | 3.0548196  | -3.2050672 | 0.1290606  |
| H | 1.9830337  | 1.7720745  | -2.6818483 |
| H | 2.7435102  | 2.8774597  | -1.4974909 |
| H | 2.8165627  | 1.1025515  | -1.2308218 |
| H | 0.5789032  | 1.9877678  | 1.6930093  |
| H | 1.5044062  | 3.3642760  | 1.0344730  |
| H | 2.2616488  | 1.7360645  | 1.1264384  |

2a\_sy\_c\_9.log

E = -1148.924544  
H = -1148.588654  
G = -1148.656358

NImag=0

|   |            |            |           |
|---|------------|------------|-----------|
| C | -0.0630772 | 1.8945615  | 6.5845285 |
| C | -0.7929091 | 1.3730758  | 5.3726913 |
| C | -0.1103681 | 1.3469574  | 7.8572567 |
| O | 0.4881947  | 1.8109353  | 8.8869686 |
| C | 0.0999246  | 1.2595451  | 4.1099973 |
| C | -0.6723969 | 0.9437016  | 2.8545171 |
| C | -1.7285228 | 1.7615436  | 2.4306002 |
| C | -2.4498497 | 1.4431684  | 1.2874228 |
| C | -2.1167263 | 0.2903606  | 0.5648292 |
| C | -1.0673348 | -0.5371798 | 0.9785668 |

|   |            |            |            |
|---|------------|------------|------------|
| C | -0.3483498 | -0.2010834 | 2.1203349  |
| C | -0.9525968 | 0.0846429  | 8.0719966  |
| C | -1.3827576 | -0.0268606 | 5.6120872  |
| C | -2.0150851 | -0.1212261 | 6.9962581  |
| S | 1.0531751  | 2.8484203  | 3.8593022  |
| C | 1.5624751  | 2.7718329  | 2.1287812  |
| C | 2.6418443  | 2.4705755  | 4.6330804  |
| C | -2.8616240 | -0.0454180 | -0.6197030 |
| N | -3.4606592 | -0.3158089 | -1.5731961 |
| H | 0.4409554  | 2.8589576  | 6.4991406  |
| H | -1.6258931 | 2.0416471  | 5.0940995  |
| H | 0.8847162  | 0.5116765  | 4.2704896  |
| H | -1.9903895 | 2.6590526  | 2.9848387  |
| H | -3.2642081 | 2.0775485  | 0.9535581  |
| H | -0.8191504 | -1.4277585 | 0.4108514  |
| H | 0.4697723  | -0.8362535 | 2.4476684  |
| H | -0.2806435 | -0.7851730 | 8.1073189  |
| H | -1.4076951 | 0.1670524  | 9.0654608  |
| H | -0.5775219 | -0.7733220 | 5.5396700  |
| H | -2.1136027 | -0.2624219 | 4.8302462  |
| H | -2.5089125 | -1.0920995 | 7.1178590  |
| H | -2.7931463 | 0.6485844  | 7.0923723  |
| H | 0.6994647  | 2.9907545  | 1.4999043  |
| H | 2.3201881  | 3.5480755  | 2.0008712  |
| H | 1.9768009  | 1.7861676  | 1.9078017  |
| H | 2.4675804  | 2.3067752  | 5.6956998  |
| H | 3.2853489  | 3.3387717  | 4.4776736  |
| H | 3.0621798  | 1.5814210  | 4.1592556  |

2a\_sy\_c\_9\_ts1.log

E = -1148.894657

H = -1148.561813

G = -1148.630731

NImag=1

|   |            |            |            |
|---|------------|------------|------------|
| C | -2.4900798 | -0.5104926 | -1.1655669 |
| C | -1.1962198 | -0.8746999 | -0.7790837 |
| C | -3.6426133 | -0.9032373 | -0.4150835 |
| O | -4.7879322 | -0.4575341 | -0.6195496 |
| C | -0.2456883 | 0.6161498  | 0.4854114  |
| C | 1.1552236  | 0.3330930  | 0.3080598  |
| C | 1.8752242  | 0.6965493  | -0.8582511 |
| C | 3.1903630  | 0.3060116  | -1.0432594 |
| C | 3.8376284  | -0.4718795 | -0.0702113 |
| C | 3.1438468  | -0.8490137 | 1.0938235  |
| C | 1.8332409  | -0.4496775 | 1.2768093  |
| C | -3.4091446 | -1.9136655 | 0.6975789  |
| C | -0.9821490 | -2.1031806 | 0.0985451  |
| C | -2.2806567 | -2.8770831 | 0.3343117  |
| S | -0.8418786 | 2.1106719  | -0.2363297 |
| C | 0.0675037  | 3.4601407  | 0.5598119  |
| C | -2.4345818 | 2.3018794  | 0.5849982  |
| C | 5.1975168  | -0.8734955 | -0.2604119 |
| N | 6.3006324  | -1.2002479 | -0.4146851 |
| H | -2.6373120 | 0.2122412  | -1.9664690 |
| H | -0.4049803 | -0.6725513 | -1.5007704 |
| H | -0.6507685 | 0.4809669  | 1.4880753  |
| H | 1.3987528  | 1.2905755  | -1.6346211 |
| H | 3.7237651  | 0.5976369  | -1.9428699 |
| H | 3.6448206  | -1.4442611 | 1.8511038  |
| H | 1.3101148  | -0.7314120 | 2.1863357  |
| H | -3.1431246 | -1.3574775 | 1.6100528  |

|   |            |            |            |
|---|------------|------------|------------|
| H | -4.3513553 | -2.4337987 | 0.8938541  |
| H | -0.5639801 | -1.8166360 | 1.0696353  |
| H | -0.2340393 | -2.7471281 | -0.3771231 |
| H | -2.1324350 | -3.6170284 | 1.1275558  |
| H | -2.5591262 | -3.4257544 | -0.5735795 |
| H | 1.1059034  | 3.3986862  | 0.2291466  |
| H | -0.3733876 | 4.4026897  | 0.2270034  |
| H | -0.0038177 | 3.3495109  | 1.6432970  |
| H | -3.0969754 | 1.5112298  | 0.2326745  |
| H | -2.8282952 | 3.2781082  | 0.2968015  |
| H | -2.2839152 | 2.2447919  | 1.6650486  |

2a\_sy\_c\_prod\_1.log

E = -671.036095  
H = -670.784080  
G = -670.838777

NImag=0

|   |            |            |            |
|---|------------|------------|------------|
| C | -0.5955795 | 0.9277681  | 2.8648940  |
| C | -1.5914813 | -0.1904406 | 2.6250791  |
| C | -1.5771761 | 0.9920245  | 1.7032720  |
| C | -1.1877736 | 0.9170118  | 0.2619826  |
| C | -0.0740113 | 1.6019923  | -0.2363427 |
| C | 0.2631291  | 1.5254578  | -1.5832309 |
| C | -0.5310791 | 0.7607631  | -2.4456253 |
| C | -1.6629644 | 0.0865435  | -1.9671721 |
| C | -1.9836747 | 0.1721749  | -0.6189903 |
| H | -2.3779655 | 1.7068910  | 1.8819322  |
| H | -0.7852996 | 1.6412256  | 3.6606704  |
| H | -2.4259102 | -0.2207727 | 3.3197357  |
| C | -1.0804550 | -1.5567337 | 2.2019001  |
| C | 0.2814398  | -1.5444057 | 1.4983545  |
| C | 1.3111628  | -0.7150353 | 2.2637833  |
| C | 0.8621242  | 0.6737498  | 2.6602029  |
| O | 1.6771630  | 1.5477418  | 2.9143196  |
| C | -0.1860659 | 0.6713740  | -3.8388130 |
| N | 0.0918064  | 0.5987763  | -4.9611645 |
| H | 0.5391220  | 2.1975467  | 0.4336437  |
| H | 1.1313474  | 2.0510487  | -1.9672179 |
| H | -2.2743143 | -0.4977431 | -2.6472034 |
| H | -2.8545099 | -0.3542318 | -0.2382736 |
| H | -0.9989535 | -2.1701840 | 3.1076250  |
| H | -1.8242647 | -2.0411777 | 1.5581801  |
| H | 0.1898520  | -1.1685285 | 0.4758101  |
| H | 0.6458614  | -2.5730388 | 1.4169804  |
| H | 2.2585098  | -0.6322519 | 1.7236735  |
| H | 1.5305606  | -1.2083461 | 3.2233944  |

2a\_sy\_c\_prod\_2.log

E = -671.035810  
H = -670.783692  
G = -670.838268

NImag=0

|   |            |            |            |
|---|------------|------------|------------|
| C | -0.5327941 | 0.9223185  | 2.7729639  |
| C | -1.5550621 | -0.1888973 | 2.5667913  |
| C | -1.5481913 | 0.9924349  | 1.6426196  |
| C | -1.1814280 | 0.9195767  | 0.1942006  |
| C | -0.1185589 | 1.6688591  | -0.3238179 |
| C | 0.1811327  | 1.6384981  | -1.6808181 |
| C | -0.5976510 | 0.8492022  | -2.5355335 |
| C | -1.6728592 | 0.1024007  | -2.0376589 |

|   |            |            |            |
|---|------------|------------|------------|
| C | -1.9568267 | 0.1446765  | -0.6781694 |
| H | -2.3333599 | 1.7206352  | 1.8358266  |
| H | -0.6863187 | 1.6289913  | 3.5818159  |
| H | -2.3622510 | -0.1889378 | 3.2922200  |
| C | -1.0716090 | -1.5683161 | 2.1249229  |
| C | 0.4030448  | -1.8096500 | 2.4475036  |
| C | 1.2671526  | -0.6832327 | 1.8699652  |
| C | 0.9076300  | 0.6375405  | 2.5134361  |
| O | 1.7663732  | 1.4274298  | 2.8775561  |
| C | -0.2931581 | 0.8072935  | -3.9405691 |
| N | -0.0479657 | 0.7732811  | -5.0722545 |
| H | 0.4812857  | 2.2851623  | 0.3402250  |
| H | 1.0073832  | 2.2185872  | -2.0786283 |
| H | -2.2727592 | -0.5016076 | -2.7106033 |
| H | -2.7909847 | -0.4306046 | -0.2862524 |
| H | -1.6881934 | -2.3230523 | 2.6209527  |
| H | -1.2201347 | -1.6986586 | 1.0466711  |
| H | 0.7270773  | -2.7710092 | 2.0373230  |
| H | 0.5444940  | -1.8544614 | 3.5345244  |
| H | 1.0960404  | -0.6108575 | 0.7869507  |
| H | 2.3351919  | -0.8513029 | 2.0301367  |

2a\_sy\_tr\_1.log

E = -1148.924672

H = -1148.588809

G = -1148.656669

NImag=0

|   |            |            |            |
|---|------------|------------|------------|
| C | -4.2101160 | 4.1734095  | -5.0594072 |
| C | -4.0567295 | 5.6655694  | -5.1924850 |
| C | -3.2054370 | 3.2773440  | -4.7375941 |
| O | -3.3617619 | 2.0206405  | -4.5573393 |
| C | -5.2377787 | 6.3799135  | -4.4852218 |
| C | -5.2220183 | 7.8859027  | -4.5981759 |
| C | -6.0638229 | 8.4782948  | -5.5451048 |
| C | -6.0473630 | 9.8533566  | -5.7508800 |
| C | -5.1851674 | 10.6466308 | -4.9873188 |
| C | -4.3443614 | 10.0710084 | -4.0263452 |
| C | -4.3636777 | 8.6950832  | -3.8416714 |
| C | -1.7811444 | 3.8192967  | -4.5803581 |
| C | -2.6815171 | 6.1508351  | -4.7174203 |
| C | -1.5874192 | 5.2013273  | -5.1985619 |
| S | -5.3031885 | 5.8482540  | -2.6984414 |
| C | -6.5495166 | 6.9811145  | -2.0348999 |
| C | -6.3022210 | 4.3389296  | -2.6985891 |
| C | -5.1650063 | 12.0714053 | -5.1870774 |
| N | -5.1486057 | 13.2181587 | -5.3479161 |
| H | -5.2083013 | 3.7680969  | -5.2303985 |
| H | -4.1812850 | 6.0017150  | -6.2388342 |
| H | -6.1784857 | 5.9988889  | -4.8987622 |
| H | -6.7366100 | 7.8569189  | -6.1290671 |
| H | -6.6981783 | 10.3096437 | -6.4893116 |
| H | -3.6834257 | 10.6970064 | -3.4363096 |
| H | -3.7048881 | 8.2600531  | -3.0944057 |
| H | -1.5365693 | 3.8492822  | -3.5083605 |
| H | -1.1030912 | 3.0862954  | -5.0326886 |
| H | -2.4937208 | 7.1687349  | -5.0745857 |
| H | -2.6484531 | 6.1814756  | -3.6181881 |
| H | -0.6011937 | 5.6056199  | -4.9436723 |
| H | -1.6297923 | 5.1269102  | -6.2939868 |
| H | -6.8322659 | 6.5911921  | -1.0554617 |
| H | -6.1069276 | 7.9701152  | -1.9223039 |

|   |            |           |            |
|---|------------|-----------|------------|
| H | -7.4123525 | 7.0086221 | -2.7043003 |
| H | -6.7010505 | 4.2392462 | -1.6865016 |
| H | -5.6485762 | 3.5048114 | -2.9438066 |
| H | -7.1104803 | 4.4401971 | -3.4254471 |

2a\_sy\_tr\_10.log

E = -1148.913664  
H = -1148.577636  
G = -1148.645527

NImag=0

|   |            |            |            |
|---|------------|------------|------------|
| C | -4.1815011 | 4.3737093  | -5.4340312 |
| C | -3.8812657 | 5.7868507  | -4.9848347 |
| C | -3.3974190 | 3.2635063  | -5.1898097 |
| O | -3.6865944 | 2.0567196  | -5.5107072 |
| C | -5.2033588 | 6.5121193  | -4.6128176 |
| C | -5.2307877 | 8.0237618  | -4.7404316 |
| C | -4.2963905 | 8.8570689  | -4.1109702 |
| C | -4.3397917 | 10.2337457 | -4.2963178 |
| C | -5.3295090 | 10.7874278 | -5.1162246 |
| C | -6.2751411 | 9.9718421  | -5.7461604 |
| C | -6.2173736 | 8.5971509  | -5.5525874 |
| C | -2.0641198 | 3.4675079  | -4.4633911 |
| C | -2.7479689 | 5.8202128  | -3.9521512 |
| C | -1.6041431 | 4.9218416  | -4.4201958 |
| S | -6.0565286 | 6.1085800  | -3.0059307 |
| C | -5.7952729 | 4.3603201  | -2.6326175 |
| C | -5.1597446 | 6.9151543  | -1.6630094 |
| C | -5.3755314 | 12.2124956 | -5.3127121 |
| N | -5.4130149 | 13.3589379 | -5.4712176 |
| H | -5.1163566 | 4.2188669  | -5.9753322 |
| H | -3.5422137 | 6.4105914  | -5.8344685 |
| H | -5.9618987 | 6.1272833  | -5.3029976 |
| H | -3.5317133 | 8.4449355  | -3.4632033 |
| H | -3.6138542 | 10.8768226 | -3.8102080 |
| H | -7.0392909 | 10.4098958 | -6.3793981 |
| H | -6.9455625 | 7.9588541  | -6.0450276 |
| H | -2.1706352 | 3.0772492  | -3.4397408 |
| H | -1.3200060 | 2.8328582  | -4.9588611 |
| H | -2.3846435 | 6.8397915  | -3.7954152 |
| H | -3.0924050 | 5.4387045  | -2.9836082 |
| H | -0.7420548 | 5.0358483  | -3.7532402 |
| H | -1.2809619 | 5.2424321  | -5.4202435 |
| H | -6.3304907 | 4.1885253  | -1.6955824 |
| H | -6.2471817 | 3.7790036  | -3.4359700 |
| H | -4.7365443 | 4.1298603  | -2.5312230 |
| H | -5.5758256 | 6.4916445  | -0.7458231 |
| H | -5.3854549 | 7.9808084  | -1.7024708 |
| H | -4.0887497 | 6.7291721  | -1.7198687 |

2a\_sy\_tr\_10\_ts1.log

E = -1148.891534  
H = -1148.558019  
G = -1148.624931

NImag=1

|   |            |            |            |
|---|------------|------------|------------|
| C | -2.7091206 | -0.6530816 | -1.1471456 |
| C | -1.3366440 | -0.9013305 | -1.0007176 |
| C | -3.6806037 | -1.0047028 | -0.1614643 |
| O | -4.8900805 | -0.7087564 | -0.2461938 |
| C | -0.1760749 | 0.9061307  | -0.9555911 |
| C | 1.1661624  | 0.5366298  | -0.5649450 |

|   |            |            |            |
|---|------------|------------|------------|
| C | 1.6840421  | 0.5933955  | 0.7500239  |
| C | 2.9432875  | 0.0997616  | 1.0495890  |
| C | 3.7306556  | -0.4833593 | 0.0452944  |
| C | 3.2381550  | -0.5569129 | -1.2688716 |
| C | 1.9855800  | -0.0507825 | -1.5626253 |
| C | -3.2162925 | -1.8560092 | 1.0188295  |
| C | -0.8539192 | -1.6458219 | 0.2323241  |
| C | -1.9252382 | -2.6188338 | 0.7281874  |
| S | -1.1226254 | 2.1578701  | -0.1751523 |
| C | -1.6613539 | 1.6031939  | 1.4570334  |
| C | -0.0319702 | 3.5295213  | 0.2806482  |
| C | 5.0298433  | -0.9964779 | 0.3580997  |
| N | 6.0829705  | -1.4129772 | 0.6114513  |
| H | -3.0795969 | -0.1927485 | -2.0611869 |
| H | -0.7625365 | -1.0765707 | -1.9084835 |
| H | -0.3030440 | 1.0776838  | -2.0220004 |
| H | 1.1032416  | 1.0206531  | 1.5589859  |
| H | 3.3212259  | 0.1583479  | 2.0655702  |
| H | 3.8454946  | -1.0035698 | -2.0500693 |
| H | 1.6166833  | -0.1015797 | -2.5835159 |
| H | -3.0681756 | -1.1971240 | 1.8872663  |
| H | -4.0397048 | -2.5305044 | 1.2745694  |
| H | 0.0847622  | -2.1640226 | 0.0125886  |
| H | -0.6364842 | -0.9388463 | 1.0432334  |
| H | -1.5733282 | -3.1329432 | 1.6289779  |
| H | -2.1124398 | -3.3856576 | -0.0334108 |
| H | -2.2115853 | 2.4423416  | 1.8885310  |
| H | -2.3389710 | 0.7646377  | 1.3064508  |
| H | -0.8247775 | 1.3290169  | 2.0972716  |
| H | -0.6533125 | 4.2874898  | 0.7628161  |
| H | 0.3889798  | 3.9237752  | -0.6456482 |
| H | 0.7577317  | 3.1944129  | 0.9534393  |

2a\_sy\_tr\_1\_r.log

E = -1148.925066

H = -1148.589005

G = -1148.657470

NImag=0

|   |            |            |            |
|---|------------|------------|------------|
| C | 1.8443049  | -0.9129101 | 2.0041180  |
| C | 1.2174319  | -0.7724747 | 0.6342328  |
| C | 3.1482950  | -1.3161774 | 2.2516639  |
| O | 3.6837356  | -1.4232523 | 3.4069871  |
| C | 0.3942096  | 0.5313478  | 0.6230198  |
| C | -0.7162773 | 0.5664362  | 1.6455424  |
| C | -0.8341548 | 1.6739896  | 2.4899491  |
| C | -1.8487394 | 1.7371353  | 3.4385711  |
| C | -2.7600136 | 0.6799677  | 3.5326267  |
| C | -2.6563206 | -0.4347233 | 2.6910201  |
| C | -1.6323423 | -0.4875489 | 1.7542238  |
| C | 4.0432243  | -1.6697847 | 1.0592857  |
| C | 2.2767639  | -0.7836741 | -0.4721652 |
| C | 3.2751066  | -1.9128880 | -0.2362347 |
| S | -0.3956855 | 0.7793926  | -1.0683025 |
| C | -1.6724733 | 2.0206275  | -0.7651750 |
| C | 0.7982516  | 1.8244295  | -1.9356013 |
| C | -3.8171265 | 0.7375843  | 4.5073334  |
| N | -4.6685695 | 0.7848506  | 5.2908198  |
| H | 1.2106664  | -0.7273923 | 2.8705973  |
| H | 0.5105561  | -1.5926884 | 0.4146824  |
| H | 1.0499717  | 1.4008422  | 0.7464526  |
| H | -0.1229347 | 2.4908142  | 2.4070225  |



|   |            |            |            |
|---|------------|------------|------------|
| H | -1.9370845 | 2.5936699  | 4.0985027  |
| H | -3.3695299 | -1.2478433 | 2.7761431  |
| H | -1.5555680 | -1.3566875 | 1.1069928  |
| H | 4.7652109  | -0.8521854 | 0.9199987  |
| H | 4.6270295  | -2.5531566 | 1.3422772  |
| H | 1.8045598  | -0.9056917 | -1.4560219 |
| H | 2.8150230  | 0.1759370  | -0.4739477 |
| H | 3.9622791  | -1.9938451 | -1.0858656 |
| H | 2.7293199  | -2.8643775 | -0.1734391 |
| H | -2.0207030 | 2.3453735  | -1.7479467 |
| H | -2.4912128 | 1.5522311  | -0.2188038 |
| H | -1.2486388 | 2.8578255  | -0.2070564 |
| H | 0.2859802  | 2.2103042  | -2.8193825 |
| H | 1.6481380  | 1.2154423  | -2.2379665 |
| H | 1.1063618  | 2.6404902  | -1.2792870 |

2a\_sy\_tr\_1\_ts1.log

E = -1148.894884

H = -1148.561941

G = -1148.629917

NImag=1

|   |            |            |            |
|---|------------|------------|------------|
| C | 2.5089921  | -0.9531831 | 1.1861884  |
| C | 1.1510482  | -1.0530930 | 0.8658936  |
| C | 3.5499187  | -1.1769120 | 0.2349093  |
| O | 4.7528945  | -0.9320738 | 0.4574038  |
| C | 0.2052440  | 0.8826240  | 0.7080233  |
| C | -1.1719904 | 0.5560317  | 0.4365857  |
| C | -1.9765491 | 0.1245420  | 1.5226377  |
| C | -3.2684851 | -0.3270238 | 1.3300452  |
| C | -3.8155108 | -0.3591298 | 0.0351164  |
| C | -3.0437270 | 0.0729566  | -1.0554566 |
| C | -1.7495864 | 0.5223946  | -0.8573294 |
| C | 3.1446481  | -1.7633916 | -1.1114526 |
| C | 0.7398932  | -1.7146919 | -0.4427191 |
| C | 1.8613800  | -2.5849554 | -1.0102096 |
| S | 1.0613423  | 1.7909277  | -0.5325893 |
| C | 0.2811426  | 3.4280544  | -0.6031465 |
| C | 2.5977134  | 2.2406924  | 0.2977086  |
| C | -5.1541285 | -0.8206779 | -0.1691926 |
| N | -6.2398460 | -1.1964848 | -0.3346743 |
| H | 2.8057294  | -0.5928518 | 2.1694151  |
| H | 0.4576323  | -1.1764866 | 1.6962382  |
| H | 0.4293738  | 1.2664355  | 1.7024393  |
| H | -1.5643591 | 0.1535669  | 2.5276248  |
| H | -3.8652973 | -0.6534760 | 2.1762646  |
| H | -3.4661209 | 0.0563905  | -2.0554208 |
| H | -1.1834233 | 0.8493625  | -1.7260512 |
| H | 2.9959788  | -0.9296772 | -1.8149634 |
| H | 3.9855060  | -2.3544988 | -1.4872510 |
| H | -0.1741430 | -2.2971965 | -0.2877670 |
| H | 0.4934629  | -0.9569991 | -1.1978380 |
| H | 1.5707835  | -2.9694035 | -1.9935202 |
| H | 2.0322078  | -3.4497748 | -0.3576333 |
| H | 0.8601192  | 4.0455002  | -1.2937679 |
| H | -0.7340134 | 3.2958160  | -0.9813070 |
| H | 0.2704239  | 3.8573317  | 0.4004752  |
| H | 3.0772090  | 2.9988212  | -0.3243555 |
| H | 3.2305208  | 1.3571651  | 0.3697498  |
| H | 2.3640062  | 2.6393973  | 1.2869657  |

2a\_sy\_tr\_1\_ts2.log

E = -1148.913683  
H = -1148.579607  
G = -1148.647659

NImag=1

|   |            |            |            |
|---|------------|------------|------------|
| C | 1.6110087  | -1.5577314 | -0.1835140 |
| C | 1.5981881  | -0.1649622 | -0.7661704 |
| C | 2.7258286  | -2.1488637 | 0.4418038  |
| O | 2.7149833  | -3.2956142 | 0.9651953  |
| C | 0.5421871  | 0.3364134  | 0.1546413  |
| C | -0.8616263 | -0.1332595 | 0.0639501  |
| C | -1.6330754 | -0.2083804 | 1.2315559  |
| C | -2.9651809 | -0.5959743 | 1.1772177  |
| C | -3.5357411 | -0.9033108 | -0.0642105 |
| C | -2.7792289 | -0.8288246 | -1.2414604 |
| C | -1.4466159 | -0.4463699 | -1.1720261 |
| C | 4.0519719  | -1.3883654 | 0.4212950  |
| C | 2.9236410  | 0.5858848  | -0.5765676 |
| C | 4.1190179  | -0.3518851 | -0.6990318 |
| S | 0.2259836  | 2.5259323  | -0.4336092 |
| C | -1.3433879 | 2.9246009  | 0.3679432  |
| C | 1.3489719  | 3.3784610  | 0.6993744  |
| C | -4.9167265 | -1.3006525 | -0.1320836 |
| N | -6.0288370 | -1.6195345 | -0.1868392 |
| H | 0.7285183  | -2.1768638 | -0.3155637 |
| H | 1.2844346  | -0.1286816 | -1.8175129 |
| H | 0.8860218  | 0.5526480  | 1.1668747  |
| H | -1.1794484 | 0.0341499  | 2.1885233  |
| H | -3.5614676 | -0.6599658 | 2.0812093  |
| H | -3.2360627 | -1.0687861 | -2.1958545 |
| H | -0.8640152 | -0.3861268 | -2.0861265 |
| H | 4.1921290  | -0.8921205 | 1.3921088  |
| H | 4.8469759  | -2.1357784 | 0.3295611  |
| H | 2.9836754  | 1.4107031  | -1.2961910 |
| H | 2.9491079  | 1.0283401  | 0.4286341  |
| H | 5.0528643  | 0.2175697  | -0.6422392 |
| H | 4.1039550  | -0.8549934 | -1.6746982 |
| H | -1.5002900 | 4.0034266  | 0.3012781  |
| H | -2.1414175 | 2.4064823  | -0.1670395 |
| H | -1.3231269 | 2.6102718  | 1.4142647  |
| H | 1.0248909  | 4.4179108  | 0.7870264  |
| H | 2.3531541  | 3.3471021  | 0.2760502  |
| H | 1.3346675  | 2.8962820  | 1.6797997  |

2a\_sy\_tr\_2.log

E = -1148.921535  
H = -1148.585676  
G = -1148.652694

NImag=0

|   |            |            |            |
|---|------------|------------|------------|
| C | -4.3219715 | 4.2955947  | -5.5007276 |
| C | -4.0548579 | 5.7674288  | -5.3435710 |
| C | -3.4782851 | 3.2709244  | -5.1165246 |
| O | -3.7285699 | 2.0198767  | -5.2296592 |
| C | -5.1351531 | 6.4692130  | -4.4527678 |
| C | -5.1536448 | 7.9758513  | -4.5928808 |
| C | -4.2975078 | 8.8255592  | -3.8808234 |
| C | -4.3222540 | 10.1981469 | -4.0982440 |
| C | -5.2074577 | 10.7283766 | -5.0434220 |
| C | -6.0702431 | 9.8930757  | -5.7619824 |
| C | -6.0409732 | 8.5244875  | -5.5264753 |
| C | -2.1165209 | 3.6323803  | -4.5140173 |

|   |            |            |            |
|---|------------|------------|------------|
| C | -2.5978189 | 6.0598355  | -4.9548545 |
| C | -2.0360468 | 5.0499878  | -3.9539909 |
| S | -5.0311442 | 6.0605111  | -2.6512370 |
| C | -6.5290609 | 6.8655021  | -2.0422724 |
| C | -5.5553648 | 4.3358767  | -2.5271477 |
| C | -5.2351727 | 12.1480056 | -5.2751852 |
| N | -5.2577858 | 13.2906731 | -5.4624001 |
| H | -5.2957936 | 4.0187311  | -5.9086364 |
| H | -4.2385247 | 6.2866107  | -6.2989385 |
| H | -6.1127051 | 6.0728735  | -4.7510451 |
| H | -3.6042625 | 8.4306431  | -3.1429329 |
| H | -3.6613198 | 10.8547490 | -3.5424524 |
| H | -6.7575575 | 10.3143169 | -6.4880285 |
| H | -6.7137298 | 7.8713888  | -6.0751670 |
| H | -1.8954050 | 2.8926655  | -3.7358058 |
| H | -1.3549882 | 3.4972690  | -5.2959734 |
| H | -1.9963045 | 5.9991530  | -5.8706732 |
| H | -2.4862554 | 7.0835608  | -4.5818562 |
| H | -2.5844156 | 5.0992190  | -3.0039806 |
| H | -0.9987788 | 5.3107648  | -3.7136705 |
| H | -6.6812871 | 6.5178712  | -1.0187372 |
| H | -6.3678086 | 7.9437259  | -2.0461083 |
| H | -7.3728123 | 6.5885527  | -2.6781396 |
| H | -5.8273924 | 4.1856845  | -1.4795427 |
| H | -4.7195035 | 3.6963696  | -2.8051115 |
| H | -6.4111226 | 4.1687442  | -3.1838169 |

2a\_sy\_tr\_2\_r.log

E = -1148.925047

H = -1148.589056

G = -1148.656087

NImag=0

|   |            |            |            |
|---|------------|------------|------------|
| C | 1.4912981  | -2.4540527 | 1.5947413  |
| C | 0.8205261  | -1.7581572 | 0.4333202  |
| C | 2.8582844  | -2.4667833 | 1.8304833  |
| O | 3.4370506  | -3.0641002 | 2.8005519  |
| C | 0.1058459  | -0.4984139 | 0.9869505  |
| C | -0.9634206 | -0.8194024 | 2.0032174  |
| C | -1.9787786 | -1.7403341 | 1.7155511  |
| C | -2.9614786 | -2.0210447 | 2.6560169  |
| C | -2.9247205 | -1.3780873 | 3.8997923  |
| C | -1.9154154 | -0.4576590 | 4.2015486  |
| C | -0.9431981 | -0.1812262 | 3.2467654  |
| C | 3.7869510  | -1.7512899 | 0.8407251  |
| C | 1.8273145  | -1.4482120 | -0.6792214 |
| C | 3.0874525  | -0.7918346 | -0.1215358 |
| S | -0.7104849 | 0.4815520  | -0.4084235 |
| C | -1.9318215 | 1.5178501  | 0.4273604  |
| C | 0.5256442  | 1.7519165  | -0.7671645 |
| C | -3.9387143 | -1.6673130 | 4.8790919  |
| N | -4.7552517 | -1.8991161 | 5.6668977  |
| H | 0.8508208  | -2.9693130 | 2.3098194  |
| H | 0.0357639  | -2.3948677 | 0.0007567  |
| H | 0.8242729  | 0.2084068  | 1.4140388  |
| H | -2.0130820 | -2.2435835 | 0.7530822  |
| H | -3.7509240 | -2.7314864 | 2.4348305  |
| H | -1.8965530 | 0.0325072  | 5.1692859  |
| H | -0.1564905 | 0.5334671  | 3.4706361  |
| H | 4.5528032  | -1.2301813 | 1.4265445  |
| H | 4.3130473  | -2.5311294 | 0.2711621  |
| H | 2.1021644  | -2.4022386 | -1.1467532 |

|   |            |            |            |
|---|------------|------------|------------|
| H | 1.3754381  | -0.8466146 | -1.4778824 |
| H | 2.8251542  | 0.1365312  | 0.4045682  |
| H | 3.7607687  | -0.5068732 | -0.9381406 |
| H | -2.2776388 | 2.2415996  | -0.3136833 |
| H | -2.7630063 | 0.8877305  | 0.7446498  |
| H | -1.4687145 | 2.0231139  | 1.2772004  |
| H | 0.0475325  | 2.4762548  | -1.4295478 |
| H | 1.3719381  | 1.2916373  | -1.2757700 |
| H | 0.8344108  | 2.2247127  | 0.1671843  |

2a\_sy\_tr\_2\_ts1.log

E = -1148.897692  
H = -1148.564630  
G = -1148.631837

NImag=1

|   |            |            |            |
|---|------------|------------|------------|
| C | 2.4549308  | -1.0899638 | 1.2194891  |
| C | 1.1489902  | -1.1744998 | 0.7225821  |
| C | 3.6126537  | -1.2901605 | 0.4121237  |
| O | 4.7792610  | -1.1852472 | 0.8436503  |
| C | 0.1861768  | 0.7401115  | 0.6259981  |
| C | -1.2112881 | 0.4305485  | 0.3913338  |
| C | -1.8424250 | 0.4886572  | -0.8750589 |
| C | -3.1516081 | 0.0734489  | -1.0464138 |
| C | -3.8806683 | -0.4269066 | 0.0447297  |
| C | -3.2759135 | -0.5006765 | 1.3095874  |
| C | -1.9688164 | -0.0765993 | 1.4751796  |
| C | 3.4128043  | -1.7269874 | -1.0364634 |
| C | 0.9263057  | -1.7609971 | -0.6501507 |
| C | 2.0437051  | -1.3698488 | -1.6126011 |
| S | 0.8885664  | 1.8891169  | -0.5073863 |
| C | 0.3009661  | 3.5210180  | 0.0243003  |
| C | 2.6090493  | 2.0214099  | 0.0148052  |
| C | -5.2347561 | -0.8564366 | -0.1313929 |
| N | -6.3320987 | -1.2058775 | -0.2743281 |
| H | 2.6209825  | -0.8189969 | 2.2603831  |
| H | 0.3580448  | -1.3833614 | 1.4431741  |
| H | 0.4329721  | 1.0282011  | 1.6484553  |
| H | -1.3034409 | 0.8608319  | -1.7422255 |
| H | -3.6169482 | 0.1313373  | -2.0254427 |
| H | -3.8383100 | -0.8831575 | 2.1558724  |
| H | -1.5137155 | -0.1229655 | 2.4608696  |
| H | 4.2240985  | -1.2978671 | -1.6334691 |
| H | 3.5495851  | -2.8178993 | -1.0545458 |
| H | 0.9073018  | -2.8554067 | -0.5391463 |
| H | -0.0529427 | -1.4706060 | -1.0433872 |
| H | 1.9950638  | -0.2902074 | -1.8069128 |
| H | 1.9005975  | -1.8618029 | -2.5802649 |
| H | 0.7901689  | 4.2775466  | -0.5938370 |
| H | -0.7781212 | 3.5449697  | -0.1378913 |
| H | 0.5403285  | 3.6578401  | 1.0809093  |
| H | 2.9920920  | 2.9437358  | -0.4258534 |
| H | 3.1650420  | 1.1688324  | -0.3712608 |
| H | 2.6581597  | 2.0610829  | 1.1048167  |

2a\_sy\_tr\_2\_ts2.log

E = -1148.917918  
H = -1148.583518  
G = -1148.650050

NImag=1

|   |            |            |           |
|---|------------|------------|-----------|
| C | -1.4893781 | -1.7318877 | 0.5734075 |
|---|------------|------------|-----------|

|   |            |            |            |
|---|------------|------------|------------|
| C | -1.5559464 | -0.3120164 | 1.0830370  |
| C | -2.4966676 | -2.3347998 | -0.1967195 |
| O | -2.4448933 | -3.5206693 | -0.6287708 |
| C | -0.6483477 | 0.2457980  | 0.0351223  |
| C | 0.7979152  | -0.1075908 | 0.0366319  |
| C | 1.5156119  | -0.2380188 | 1.2344819  |
| C | 2.8771137  | -0.5083746 | 1.2123232  |
| C | 3.5309961  | -0.6501412 | -0.0187941 |
| C | 2.8287065  | -0.5199544 | -1.2231021 |
| C | 1.4681497  | -0.2447548 | -1.1859678 |
| C | -3.7843173 | -1.5541926 | -0.4734354 |
| C | -2.9736260 | 0.2558177  | 1.0763730  |
| C | -3.7045350 | -0.0463484 | -0.2309274 |
| S | -0.5220581 | 2.4508822  | 0.3661173  |
| C | 0.9940058  | 2.9381615  | -0.4871715 |
| C | -1.7312496 | 3.0159419  | -0.8537518 |
| C | 4.9412099  | -0.9322894 | -0.0451363 |
| N | 6.0769429  | -1.1586546 | -0.0665551 |
| H | -0.6071868 | -2.3212420 | 0.8081333  |
| H | -1.1198837 | -0.2020758 | 2.0813578  |
| H | -1.0774546 | 0.3181581  | -0.9639295 |
| H | 1.0148443  | -0.1221018 | 2.1909087  |
| H | 3.4351213  | -0.6087275 | 2.1373283  |
| H | 3.3457553  | -0.6333157 | -2.1701149 |
| H | 0.9134022  | -0.1398382 | -2.1143579 |
| H | -4.0898160 | -1.7703295 | -1.5029243 |
| H | -4.5539339 | -1.9955190 | 0.1756825  |
| H | -3.5175862 | -0.2104927 | 1.9073973  |
| H | -2.9589397 | 1.3338508  | 1.2800795  |
| H | -3.1920461 | 0.4384184  | -1.0711248 |
| H | -4.7116678 | 0.3836737  | -0.1998046 |
| H | 1.0270596  | 4.0290898  | -0.5301669 |
| H | 1.8442046  | 2.5688334  | 0.0893604  |
| H | 1.0083250  | 2.5195810  | -1.4961611 |
| H | -1.6047797 | 4.0916632  | -0.9939431 |
| H | -2.7313313 | 2.8156947  | -0.4666395 |
| H | -1.5769812 | 2.4909677  | -1.7997045 |

2a\_sy\_tr\_3.log

E = -1148.926550  
H = -1148.591050  
G = -1148.659311

NImag=0

|   |            |            |            |
|---|------------|------------|------------|
| C | -3.4780180 | 5.0912317  | -3.9021639 |
| C | -4.7252325 | 5.1302290  | -4.7463592 |
| C | -2.1908062 | 4.9308419  | -4.3890148 |
| O | -1.1254437 | 4.9128296  | -3.6822500 |
| C | -5.7742048 | 6.1817488  | -4.2919846 |
| C | -5.3971178 | 7.6297719  | -4.4779274 |
| C | -4.3599263 | 8.2291497  | -3.7506203 |
| C | -4.0127173 | 9.5550478  | -3.9850258 |
| C | -4.7090500 | 10.2883220 | -4.9522888 |
| C | -5.7545906 | 9.7058420  | -5.6784148 |
| C | -6.0935663 | 8.3811298  | -5.4315336 |
| C | -1.9990596 | 4.7675555  | -5.9018314 |
| C | -4.4023951 | 5.3766350  | -6.2256246 |
| C | -3.2811107 | 4.4391199  | -6.6649519 |
| S | -6.1717903 | 5.9372811  | -2.5032579 |
| C | -7.7299188 | 6.8337363  | -2.3742011 |
| C | -6.7496953 | 4.2316463  | -2.4626095 |
| C | -4.3508244 | 11.6601048 | -5.1978386 |

|   |            |            |            |
|---|------------|------------|------------|
| N | -4.0630758 | 12.7642329 | -5.3962753 |
| H | -3.5801646 | 5.1645171  | -2.8176337 |
| H | -5.2794045 | 4.1753508  | -4.7129460 |
| H | -6.7213056 | 5.9839232  | -4.8079617 |
| H | -3.8175904 | 7.6642119  | -2.9996780 |
| H | -3.2088847 | 10.0203111 | -3.4243315 |
| H | -6.2923514 | 10.2859267 | -6.4210550 |
| H | -6.9034814 | 7.9210679  | -5.9906810 |
| H | -1.5620834 | 5.7001155  | -6.2874283 |
| H | -1.2425859 | 3.9883022  | -6.0508067 |
| H | -5.3046343 | 5.2348171  | -6.8334052 |
| H | -4.0674808 | 6.4133522  | -6.3662323 |
| H | -3.1182884 | 4.5219002  | -7.7455412 |
| H | -3.5797785 | 3.4008935  | -6.4646564 |
| H | -8.1278523 | 6.6479898  | -1.3748107 |
| H | -7.5114362 | 7.8963907  | -2.4936996 |
| H | -8.4203449 | 6.4832922  | -3.1438597 |
| H | -7.2482134 | 4.0930999  | -1.5012012 |
| H | -5.8778765 | 3.5789420  | -2.5246243 |
| H | -7.4416992 | 4.0569399  | -3.2889741 |

2a\_sy\_tr\_3\_ts1.log

E = -1148.899940

H = -1148.566917

G = -1148.633875

NImag=1

|   |            |            |            |
|---|------------|------------|------------|
| C | 0.9684119  | -1.9303112 | -0.7626120 |
| C | 1.3915854  | -1.5581098 | 0.5192593  |
| C | -0.3835468 | -2.2926879 | -1.0558143 |
| O | -0.8015681 | -2.5526197 | -2.2019365 |
| C | 1.4346140  | 0.5900036  | 0.6737527  |
| C | 0.0684930  | 0.9628533  | 0.4030776  |
| C | -0.4954965 | 0.8959863  | -0.8950519 |
| C | -1.8542701 | 1.0828573  | -1.0956735 |
| C | -2.6973968 | 1.3413723  | -0.0055649 |
| C | -2.1586936 | 1.4317885  | 1.2913449  |
| C | -0.8025653 | 1.2488330  | 1.4844726  |
| C | -1.3307761 | -2.4196863 | 0.1330296  |
| C | 0.5336043  | -1.8966570 | 1.7301984  |
| C | -0.5882735 | -2.8790967 | 1.3873225  |
| S | 2.5811291  | 1.0775236  | -0.5707187 |
| C | 3.0390868  | 2.7779249  | -0.1525850 |
| C | 4.1128882  | 0.2345882  | -0.1306668 |
| C | -4.1018432 | 1.5299028  | -0.2135867 |
| N | -5.2401461 | 1.6820840  | -0.3801753 |
| H | 1.6608423  | -1.8750455 | -1.6019492 |
| H | 2.4603877  | -1.5823483 | 0.7130975  |
| H | 1.8198900  | 0.8050650  | 1.6717564  |
| H | 0.1323059  | 0.6904913  | -1.7556298 |
| H | -2.2709272 | 1.0182438  | -2.0962559 |
| H | -2.8088109 | 1.6498918  | 2.1329143  |
| H | -0.3904337 | 1.3267416  | 2.4868617  |
| H | -1.7990976 | -1.4401505 | 0.3130417  |
| H | -2.1275924 | -3.1162972 | -0.1454940 |
| H | 1.1791883  | -2.3068424 | 2.5143204  |
| H | 0.0781228  | -0.9926384 | 2.1491050  |
| H | -1.2773503 | -2.9647416 | 2.2344672  |
| H | -0.1673328 | -3.8763754 | 1.2090834  |
| H | 3.8091543  | 3.1053316  | -0.8546000 |
| H | 2.1426941  | 3.3899156  | -0.2664724 |
| H | 3.4033294  | 2.8086299  | 0.8762191  |

|   |           |            |            |
|---|-----------|------------|------------|
| H | 4.9222234 | 0.7716384  | -0.6286271 |
| H | 4.0699446 | -0.7872306 | -0.5069564 |
| H | 4.2451732 | 0.2563879  | 0.9530750  |

2a\_sy\_tr\_4.log

E = -1148.926753  
H = -1148.591069  
G = -1148.658092

NImag=0

|   |            |            |            |
|---|------------|------------|------------|
| C | -3.6336712 | 4.8112574  | -3.9449967 |
| C | -4.8969102 | 4.9593018  | -4.7454041 |
| C | -2.3449661 | 5.0017666  | -4.4174652 |
| O | -1.2744273 | 4.8303003  | -3.7399226 |
| C | -5.8631995 | 6.0859545  | -4.2413155 |
| C | -5.4058921 | 7.5028492  | -4.4605986 |
| C | -4.3419099 | 8.0603493  | -3.7377261 |
| C | -3.8861607 | 9.3396103  | -4.0329642 |
| C | -4.5013476 | 10.0696020 | -5.0568342 |
| C | -5.5786773 | 9.5331331  | -5.7724626 |
| C | -6.0277867 | 8.2550636  | -5.4635717 |
| C | -2.1555801 | 5.4063928  | -5.8829922 |
| C | -4.6287877 | 5.1513706  | -6.2507960 |
| C | -3.3950415 | 6.0054226  | -6.5432083 |
| S | -6.1578569 | 5.8720225  | -2.4332050 |
| C | -7.6755054 | 6.8223096  | -2.2236670 |
| C | -6.7963680 | 4.1901795  | -2.3277743 |
| C | -4.0298012 | 11.3930380 | -5.3676304 |
| N | -3.6502139 | 12.4581644 | -5.6182739 |
| H | -3.7284220 | 4.4786668  | -2.9086382 |
| H | -5.5134240 | 4.0521182  | -4.6597255 |
| H | -6.8486365 | 5.9428558  | -4.7002880 |
| H | -3.8543115 | 7.4927739  | -2.9516947 |
| H | -3.0585136 | 9.7707227  | -3.4795265 |
| H | -6.0554465 | 10.1132880 | -6.5554219 |
| H | -6.8618096 | 7.8303221  | -6.0150570 |
| H | -1.3144644 | 6.1080040  | -5.9247239 |
| H | -1.8354470 | 4.5078966  | -6.4309771 |
| H | -4.4672832 | 4.1559373  | -6.6838373 |
| H | -5.5171194 | 5.5685711  | -6.7425282 |
| H | -3.5432636 | 7.0289145  | -6.1812673 |
| H | -3.2524325 | 6.0757855  | -7.6282380 |
| H | -8.0050837 | 6.6841556  | -1.1924106 |
| H | -7.4342848 | 7.8725764  | -2.3970243 |
| H | -8.4302252 | 6.4687618  | -2.9288392 |
| H | -7.2463909 | 4.0902388  | -1.3379895 |
| H | -5.9572118 | 3.5001407  | -2.4238279 |
| H | -7.5399265 | 4.0285821  | -3.1108763 |

2a\_sy\_tr\_4\_ts1.log

E = -1148.900930  
H = -1148.567901  
G = -1148.634998

NImag=1

|   |            |            |            |
|---|------------|------------|------------|
| C | 1.5466171  | -1.8595412 | -0.3610340 |
| C | 1.5422521  | -1.2527939 | 0.8957534  |
| C | 0.4963540  | -2.7120161 | -0.8306579 |
| O | 0.4903700  | -3.2247446 | -1.9665455 |
| C | 1.2197464  | 0.9068279  | 0.6935965  |
| C | -0.1674289 | 1.0481752  | 0.3426007  |
| C | -0.6711007 | 0.7272924  | -0.9444196 |

|   |            |            |            |
|---|------------|------------|------------|
| C | -2.0338214 | 0.7062424  | -1.1930689 |
| C | -2.9429725 | 1.0152774  | -0.1697207 |
| C | -2.4643908 | 1.3671270  | 1.1077349  |
| C | -1.1057124 | 1.3868508  | 1.3519052  |
| C | -0.5881292 | -3.1107892 | 0.1614462  |
| C | 0.4751395  | -1.6199352 | 1.9011732  |
| C | -0.8349133 | -2.0752851 | 1.2559648  |
| S | 2.3523785  | 1.3209059  | -0.5844843 |
| C | 2.5353441  | 3.1200512  | -0.4979832 |
| C | 3.9577604  | 0.8196857  | 0.0649080  |
| C | -4.3499078 | 0.9936879  | -0.4291956 |
| N | -5.4917306 | 0.9755871  | -0.6376924 |
| H | 2.3864397  | -1.7101489 | -1.0390848 |
| H | 2.4975927  | -0.9905069 | 1.3444862  |
| H | 1.5336015  | 1.3169056  | 1.6545097  |
| H | 0.0088963  | 0.4777177  | -1.7531705 |
| H | -2.4028375 | 0.4447961  | -2.1802890 |
| H | -3.1669853 | 1.6247359  | 1.8943672  |
| H | -0.7417030 | 1.6565387  | 2.3394613  |
| H | -1.5033819 | -3.3262792 | -0.3987836 |
| H | -0.2574968 | -4.0590058 | 0.6101960  |
| H | 0.8850658  | -2.4425438 | 2.5063145  |
| H | 0.2992528  | -0.7875310 | 2.5917981  |
| H | -1.3571929 | -1.2180321 | 0.8221745  |
| H | -1.4953224 | -2.4914576 | 2.0245731  |
| H | 3.2928540  | 3.4217684  | -1.2246561 |
| H | 1.5692461  | 3.5539847  | -0.7621233 |
| H | 2.8249062  | 3.4044426  | 0.5154182  |
| H | 4.7131560  | 1.3489360  | -0.5191590 |
| H | 4.0745966  | -0.2549041 | -0.0774832 |
| H | 4.0260778  | 1.0923128  | 1.1200768  |

2a\_sy\_tr\_5.log

E = -1148.918379

H = -1148.582503

G = -1148.648866

NImag=0

|   |            |            |            |
|---|------------|------------|------------|
| C | -4.3509031 | 4.2505243  | -5.0405182 |
| C | -4.2199080 | 5.7450212  | -5.1716258 |
| C | -3.3378764 | 3.3830673  | -4.6780187 |
| O | -3.4594481 | 2.1196179  | -4.5042666 |
| C | -5.4204861 | 6.4913733  | -4.5208943 |
| C | -5.3380045 | 7.9946909  | -4.6601641 |
| C | -5.8910892 | 8.5751283  | -5.8065858 |
| C | -5.7863135 | 9.9425760  | -6.0312071 |
| C | -5.1257115 | 10.7406516 | -5.0906927 |
| C | -4.5692967 | 10.1752021 | -3.9372007 |
| C | -4.6740750 | 8.8052647  | -3.7324218 |
| C | -1.9398167 | 3.9708033  | -4.4574197 |
| C | -2.8534896 | 6.2855747  | -4.7224826 |
| C | -1.7394785 | 5.3260539  | -5.1312558 |
| S | -5.8646441 | 6.0879327  | -2.7594288 |
| C | -6.8042452 | 4.5497937  | -2.8683068 |
| C | -4.4180559 | 5.5121902  | -1.8424916 |
| C | -5.0187026 | 12.1584049 | -5.3093745 |
| N | -4.9325733 | 13.2998643 | -5.4855238 |
| H | -5.3315709 | 3.8252087  | -5.2569640 |
| H | -4.3471108 | 6.0573912  | -6.2255846 |
| H | -6.3310593 | 6.1433675  | -5.0231095 |
| H | -6.4096898 | 7.9507484  | -6.5286132 |
| H | -6.2166632 | 10.3908143 | -6.9205886 |



|   |            |            |            |
|---|------------|------------|------------|
| H | -4.0576911 | 10.8026741 | -3.2151639 |
| H | -4.2218154 | 8.3788022  | -2.8404120 |
| H | -1.7639815 | 4.0627285  | -3.3741377 |
| H | -1.2165269 | 3.2351905  | -4.8275449 |
| H | -2.6888557 | 7.2776151  | -5.1571229 |
| H | -2.8166536 | 6.4110984  | -3.6343433 |
| H | -0.7644830 | 5.7516897  | -4.8671987 |
| H | -1.7492750 | 5.2000787  | -6.2226577 |
| H | -7.2370874 | 4.3890771  | -1.8785936 |
| H | -7.5995883 | 4.6945613  | -3.6013756 |
| H | -6.1410854 | 3.7346468  | -3.1542846 |
| H | -4.8219128 | 5.1171806  | -0.9068328 |
| H | -3.7720610 | 6.3637676  | -1.6283488 |
| H | -3.9068712 | 4.7352243  | -2.4108441 |

2a\_sy\_tr\_5\_r.log

E = -1148.920812

H = -1148.584600

G = -1148.651445

NImag=0

|   |            |            |            |
|---|------------|------------|------------|
| C | -1.3008208 | -1.4251547 | 0.4440657  |
| C | -1.1013901 | -0.6990068 | -0.8739974 |
| C | -1.2614791 | -2.7997899 | 0.6257256  |
| O | -1.4091109 | -3.4016290 | 1.7437702  |
| C | -0.1368148 | 0.4709918  | -0.6001904 |
| C | -0.5853656 | 1.4295661  | 0.4859298  |
| C | 0.3475243  | 1.8935104  | 1.4187654  |
| C | -0.0302400 | 2.7838514  | 2.4165056  |
| C | -1.3593005 | 3.2190954  | 2.4741808  |
| C | -2.3034330 | 2.7662943  | 1.5453437  |
| C | -1.9116250 | 1.8720615  | 0.5563059  |
| C | -1.0284305 | -3.6916382 | -0.5965104 |
| C | -0.5595839 | -1.6417952 | -1.9546429 |
| C | -1.2874983 | -2.9823415 | -1.9204745 |
| S | 0.2682309  | 1.6182594  | -2.0333063 |
| C | 1.3816911  | 0.7298565  | -3.1436734 |
| C | -1.2377653 | 1.7585603  | -3.0141826 |
| C | -1.7617216 | 4.1415435  | 3.5025818  |
| N | -2.0856970 | 4.8850933  | 4.3292200  |
| H | -1.5318155 | -0.8231951 | 1.3210931  |
| H | -2.0459813 | -0.2679954 | -1.2480469 |
| H | 0.8571139  | 0.0788246  | -0.3528307 |
| H | 1.3766676  | 1.5488075  | 1.3671058  |
| H | 0.6913259  | 3.1383647  | 3.1449368  |
| H | -3.3312588 | 3.1086926  | 1.6037084  |
| H | -2.6511486 | 1.5116853  | -0.1528600 |
| H | 0.0074501  | -4.0593674 | -0.5632809 |
| H | -1.6735855 | -4.5707278 | -0.4859790 |
| H | -0.6737726 | -1.1949369 | -2.9469072 |
| H | 0.5150726  | -1.8105720 | -1.7890114 |
| H | -0.9667697 | -3.6036020 | -2.7643786 |
| H | -2.3653275 | -2.8076077 | -2.0435777 |
| H | 1.8037108  | 1.4850167  | -3.8098387 |
| H | 2.1749273  | 0.2938154  | -2.5336483 |
| H | 0.8529449  | -0.0319861 | -3.7126685 |
| H | -0.9879795 | 2.4041813  | -3.8591907 |
| H | -1.9951084 | 2.2434415  | -2.3959367 |
| H | -1.5717946 | 0.7807387  | -3.3605843 |

2a\_sy\_tr\_5\_ts1.log

```

E =      -1148.890742
H =      -1148.557679
G =      -1148.625569
NImag=1
C        -2.4909495      -0.6907134      -1.2026692
C        -1.1149317      -0.8230473      -0.9869273
C        -3.4775905      -1.1929019      -0.2998848
O        -4.7003697      -0.9798387      -0.4248032
C        -0.1320331       1.0735407      -0.6773456
C         1.2418889       0.7224834      -0.4143170
C         2.0404490       0.2566570      -1.4894208
C         3.3190784      -0.2255059      -1.2801350
C         3.8558797      -0.2513598       0.0192757
C         3.0869254       0.2118708       1.0996734
C         1.8025363       0.6812575       0.8855961
C        -2.9961557      -2.0758880       0.8465774
C        -0.6231679      -1.6662903       0.1787752
C        -1.6500988      -2.7357903       0.5534625
S        -0.8563790       2.2375530       0.4524250
C        -2.1600399       2.9422005      -0.5737289
C        -1.8728995       1.3318130       1.6509299
C         5.1808027      -0.7442569       0.2392106
N         6.2558757      -1.1442557       0.4171071
H        -2.8516836      -0.1754698      -2.0909157
H        -0.4752747      -0.8253334      -1.8679121
H        -0.3566158       1.4142692      -1.6855062
H         1.6385189       0.2885160      -2.4984998
H         3.9154503      -0.5765982      -2.1168218
H         3.5006008       0.1933139       2.1032466
H         1.2261547       1.0129900       1.7465955
H        -2.9126707      -1.4520734       1.7496540
H        -3.7799863      -2.8140979       1.0435638
H         0.3435030      -2.1154528      -0.0709750
H        -0.4517572      -1.0370535       1.0603615
H        -1.3008083      -3.2976375       1.4262927
H        -1.7623376      -3.4503444      -0.2710802
H        -2.7700278       3.5845202       0.0635913
H        -1.6817201       3.5324688      -1.3562632
H        -2.7535353       2.1302930      -0.9983189
H        -2.3639710       2.0919826       2.2623341
H        -1.2104071       0.7312863       2.2752387
H        -2.6041151       0.7188739       1.1286406

```

```

2a_sy_tr_5_ts2.log
E =      -1148.911014
H =      -1148.576728
G =      -1148.644645
NImag=1
C        -1.3514452      -1.6350753       0.4169622
C        -1.5123989      -0.1544876       0.6804743
C        -2.3433227      -2.4558737      -0.1473265
O        -2.1827922      -3.6782228      -0.4172624
C        -0.5181799       0.2588543      -0.3560798
C         0.9310210      -0.0573841      -0.2112973
C         1.7206865      -0.1687889      -1.3642391
C         3.0809399      -0.4252151      -1.2702650
C         3.6639427      -0.5642705      -0.0038856
C         2.8912428      -0.4458563       1.1578380
C         1.5300504      -0.1917040       1.0490892
C        -3.7267596      -1.8484588      -0.3741389
C        -2.9228694       0.3827859       0.3782989

```

|   |            |            |            |
|---|------------|------------|------------|
| C | -3.9990812 | -0.6802235 | 0.5707976  |
| S | -0.2611376 | 2.4955683  | -0.4115506 |
| C | -1.7851179 | 3.2456856  | -1.0341931 |
| C | -0.3717192 | 2.9145853  | 1.3414209  |
| C | 5.0729890  | -0.8315041 | 0.1042293  |
| N | 6.2078846  | -1.0461235 | 0.1915977  |
| H | -0.4217171 | -2.1094021 | 0.7155499  |
| H | -1.1985064 | 0.1318809  | 1.6910779  |
| H | -0.8921563 | 0.1898955  | -1.3774776 |
| H | 1.2586589  | -0.0570351 | -2.3414520 |
| H | 3.6903047  | -0.5191361 | -2.1628996 |
| H | 3.3555931  | -0.5547588 | 2.1322880  |
| H | 0.9346687  | -0.1091460 | 1.9530159  |
| H | -3.8063992 | -1.5069391 | -1.4162465 |
| H | -4.4573013 | -2.6536745 | -0.2451292 |
| H | -3.1223204 | 1.2603665  | 1.0025468  |
| H | -2.9683964 | 0.7152523  | -0.6669895 |
| H | -4.9863461 | -0.2465475 | 0.3775185  |
| H | -3.9986772 | -1.0364297 | 1.6090535  |
| H | -1.6257257 | 4.3236438  | -1.1102294 |
| H | -1.9776273 | 2.8355050  | -2.0275491 |
| H | -2.6210275 | 3.0346723  | -0.3675897 |
| H | -0.3091807 | 4.0003125  | 1.4426823  |
| H | 0.4786822  | 2.4560046  | 1.8501109  |
| H | -1.3101629 | 2.5490028  | 1.7626359  |

2a\_sy\_tr\_6.log

E = -1148.923445

H = -1148.587634

G = -1148.654919

NImag=0

|   |            |            |            |
|---|------------|------------|------------|
| C | -3.6109143 | 4.8200047  | -3.9900418 |
| C | -4.6859364 | 5.0427006  | -5.0239341 |
| C | -2.2624953 | 4.6614081  | -4.2589746 |
| O | -1.3432616 | 4.4861352  | -3.3856457 |
| C | -5.7565100 | 6.1000590  | -4.6485844 |
| C | -5.3753216 | 7.5567641  | -4.6390504 |
| C | -4.1902233 | 8.0204508  | -4.0477858 |
| C | -3.8698472 | 9.3714399  | -4.0788282 |
| C | -4.7404989 | 10.2736491 | -4.7032190 |
| C | -5.9252363 | 9.8287499  | -5.2983716 |
| C | -6.2321168 | 8.4731255  | -5.2623248 |
| C | -1.8053993 | 4.7019653  | -5.7223236 |
| C | -4.1026258 | 5.4162235  | -6.3931796 |
| C | -2.9339439 | 4.4952958  | -6.7305481 |
| S | -6.5510786 | 5.5775460  | -3.0414362 |
| C | -5.8210640 | 6.5812915  | -1.7328557 |
| C | -8.1698969 | 6.3605360  | -3.1607534 |
| C | -4.4096485 | 11.6738501 | -4.7361529 |
| N | -4.1434622 | 12.8006424 | -4.7628324 |
| H | -3.9135516 | 4.7143420  | -2.9464832 |
| H | -5.2837979 | 4.1255071  | -5.1781811 |
| H | -6.6042905 | 5.9709062  | -5.3326157 |
| H | -3.5179148 | 7.3163446  | -3.5692369 |
| H | -2.9522075 | 9.7295340  | -3.6238310 |
| H | -6.5912009 | 10.5346967 | -5.7832078 |
| H | -7.1471188 | 8.1211725  | -5.7312851 |
| H | -1.3174016 | 5.6715516  | -5.9014086 |
| H | -1.0277417 | 3.9383780  | -5.8394719 |
| H | -4.8885394 | 5.3637174  | -7.1566478 |
| H | -3.7338180 | 6.4504458  | -6.3715818 |

|   |            |           |            |
|---|------------|-----------|------------|
| H | -2.5815620 | 4.6883833 | -7.7502200 |
| H | -3.2740124 | 3.4509059 | -6.7008093 |
| H | -6.3237296 | 6.2782687 | -0.8116344 |
| H | -4.7573135 | 6.3522623 | -1.6683169 |
| H | -5.9906505 | 7.6397770 | -1.9360715 |
| H | -8.6790601 | 6.1891782 | -2.2103439 |
| H | -8.7164914 | 5.8746977 | -3.9703459 |
| H | -8.0505172 | 7.4299935 | -3.3461648 |

2a\_sy\_tr\_6\_ts1.log

E = -1148.897008

H = -1148.563466

G = -1148.629291

NImag=1

|   |            |            |            |
|---|------------|------------|------------|
| C | -1.0275562 | -1.8345340 | 0.8588135  |
| C | -1.5045802 | -1.6195708 | -0.4448617 |
| C | 0.3223359  | -2.2023225 | 1.1441324  |
| O | 0.7763814  | -2.3421489 | 2.2984732  |
| C | -1.4573828 | 0.4279626  | -0.9626670 |
| C | -0.1121741 | 0.8410274  | -0.6192264 |
| C | 0.3280625  | 0.9574026  | 0.7169314  |
| C | 1.6636675  | 1.1932512  | 1.0130284  |
| C | 2.5989074  | 1.3069325  | -0.0233999 |
| C | 2.1849238  | 1.2013681  | -1.3630880 |
| C | 0.8503821  | 0.9742119  | -1.6472479 |
| C | 1.2166175  | -2.4993901 | -0.0531445 |
| C | -0.7085592 | -2.1695142 | -1.6279367 |
| C | 0.4062497  | -3.1218940 | -1.1903638 |
| S | -2.8602222 | 1.2296741  | -0.2574599 |
| C | -3.2472125 | 0.5612818  | 1.3801458  |
| C | -2.3869276 | 2.9128809  | 0.2083927  |
| C | 3.9795640  | 1.5443327  | 0.2832443  |
| N | 5.0965959  | 1.7365611  | 0.5293643  |
| H | -1.6755368 | -1.6681462 | 1.7152821  |
| H | -2.5850078 | -1.6508575 | -0.5756581 |
| H | -1.6643133 | 0.3906139  | -2.0313343 |
| H | -0.3734093 | 0.8552987  | 1.5368979  |
| H | 1.9888267  | 1.2757703  | 2.0454255  |
| H | 2.9104485  | 1.3033152  | -2.1640108 |
| H | 0.5296343  | 0.8986409  | -2.6827063 |
| H | 1.6779639  | -1.5590798 | -0.3911268 |
| H | 2.0227476  | -3.1592183 | 0.2818037  |
| H | -1.3985868 | -2.6715198 | -2.3148544 |
| H | -0.2455873 | -1.3563561 | -2.1976405 |
| H | 1.0509203  | -3.3508295 | -2.0459193 |
| H | -0.0235706 | -4.0701293 | -0.8445459 |
| H | -4.0870430 | 1.1595459  | 1.7411378  |
| H | -3.5663173 | -0.4737899 | 1.2592425  |
| H | -2.4026363 | 0.6429723  | 2.0633403  |
| H | -3.2752030 | 3.3940791  | 0.6228827  |
| H | -2.0725955 | 3.4243393  | -0.7025025 |
| H | -1.5807049 | 2.8945435  | 0.9429033  |

2a\_sy\_tr\_6\_ts2.log

E = -1148.914344

H = -1148.580011

G = -1148.647923

NImag=1

|   |            |           |            |
|---|------------|-----------|------------|
| C | -1.2052307 | 1.7176808 | -0.7164619 |
| C | -1.4666325 | 0.2472923 | -0.9434762 |

|   |            |            |            |
|---|------------|------------|------------|
| C | -2.0712646 | 2.5564005  | 0.0023978  |
| O | -1.8540783 | 3.7825642  | 0.2158427  |
| C | -0.5930115 | -0.2050576 | 0.1892715  |
| C | 0.8843562  | 0.0176617  | 0.1119380  |
| C | 1.5725130  | -0.0347479 | -1.1081254 |
| C | 2.9513834  | 0.1285920  | -1.1463039 |
| C | 3.6535610  | 0.3426397  | 0.0462060  |
| C | 2.9806388  | 0.3878746  | 1.2740397  |
| C | 1.6033175  | 0.2202116  | 1.2975735  |
| C | -3.4113863 | 2.0020311  | 0.4950736  |
| C | -2.9506069 | -0.0952868 | -0.8222957 |
| C | -3.5666319 | 0.4796282  | 0.4513403  |
| C | 5.0806653  | 0.5162981  | 0.0100106  |
| N | 6.2302403  | 0.6559327  | -0.0188191 |
| H | -0.2835410 | 2.1468941  | -1.0985201 |
| H | -1.0820407 | -0.0997602 | -1.9074873 |
| H | 1.0356446  | -0.1957602 | -2.0378641 |
| H | 3.4843756  | 0.0921412  | -2.0905828 |
| H | 3.5341890  | 0.5543037  | 2.1922293  |
| H | 1.0725404  | 0.2529782  | 2.2452014  |
| H | -3.5782705 | 2.3854937  | 1.5076307  |
| H | -4.1770498 | 2.4700975  | -0.1394735 |
| H | -3.1135413 | -1.1754916 | -0.8815783 |
| H | -3.4514141 | 0.3438024  | -1.6945938 |
| H | -3.0973872 | 0.0251150  | 1.3329195  |
| H | -4.6274003 | 0.2108757  | 0.5021871  |
| H | -1.0025266 | -0.0210879 | 1.1813125  |
| S | -0.5093478 | -2.3986755 | 0.4400505  |
| C | -2.0751445 | -2.8804988 | 1.2024210  |
| H | -2.1006995 | -2.4343822 | 2.1985908  |
| H | -2.9271347 | -2.5422635 | 0.6127338  |
| H | -2.0893100 | -3.9689133 | 1.2931099  |
| C | -0.7209708 | -2.9836744 | -1.2536459 |
| H | -0.7661016 | -4.0746273 | -1.2395421 |
| H | -1.6291994 | -2.5731120 | -1.6971013 |
| H | 0.1560523  | -2.6655190 | -1.8216086 |

2a\_sy\_tr\_7.log

E = -1148.919293

H = -1148.583180

G = -1148.649629

NImag=0

|   |            |            |            |
|---|------------|------------|------------|
| C | -3.6469772 | 5.0473076  | -3.8477273 |
| C | -4.7049972 | 5.1297813  | -4.9174559 |
| C | -2.2866987 | 4.9206075  | -4.0771391 |
| O | -1.3832014 | 4.8698272  | -3.1719977 |
| C | -5.8339119 | 6.1722923  | -4.7120611 |
| C | -5.4609208 | 7.6366695  | -4.7205170 |
| C | -4.4412129 | 8.1588822  | -3.9115148 |
| C | -4.1062255 | 9.5058529  | -3.9856946 |
| C | -4.7962011 | 10.3415243 | -4.8715746 |
| C | -5.8181857 | 9.8369283  | -5.6828530 |
| C | -6.1415862 | 8.4879981  | -5.5999126 |
| C | -1.7927946 | 4.8347902  | -5.5256367 |
| C | -4.0938268 | 5.4181015  | -6.2989072 |
| C | -2.8906632 | 4.5113192  | -6.5360283 |
| S | -6.9587654 | 5.8732301  | -3.2511423 |
| C | -6.8678309 | 4.0984266  | -2.9466381 |
| C | -6.1870388 | 6.5463487  | -1.7667638 |
| C | -4.4498633 | 11.7362739 | -4.9477215 |
| N | -4.1714419 | 12.8587213 | -5.0089224 |

|   |            |            |            |
|---|------------|------------|------------|
| H | -3.9580590 | 5.0468640  | -2.8046154 |
| H | -5.2494506 | 4.1751861  | -5.0252471 |
| H | -6.5608073 | 6.0132317  | -5.5175666 |
| H | -3.9024927 | 7.5108314  | -3.2300584 |
| H | -3.3154094 | 9.9102583  | -3.3625673 |
| H | -6.3462829 | 10.4923711 | -6.3673268 |
| H | -6.9289776 | 8.0877353  | -6.2325079 |
| H | -1.3200291 | 5.7944715  | -5.7811950 |
| H | -0.9969668 | 4.0814597  | -5.5530748 |
| H | -4.8560325 | 5.2817866  | -7.0757958 |
| H | -3.7580477 | 6.4632683  | -6.3456599 |
| H | -2.5214901 | 4.6321261  | -7.5608919 |
| H | -3.2009251 | 3.4628099  | -6.4281492 |
| H | -7.5238455 | 3.9035071  | -2.0958413 |
| H | -7.2543085 | 3.5898737  | -3.8311165 |
| H | -5.8423188 | 3.7978650  | -2.7283397 |
| H | -6.8154464 | 6.2071787  | -0.9396017 |
| H | -6.2305162 | 7.6339157  | -1.8313979 |
| H | -5.1654503 | 6.1904771  | -1.6468388 |

2a\_sy\_tr\_8.log

E = -1148.922771  
H = -1148.586861  
G = -1148.653553

NImag=0

|   |            |            |            |
|---|------------|------------|------------|
| C | -3.7286421 | 4.6068540  | -4.0583300 |
| C | -4.8743157 | 4.8506639  | -4.9994381 |
| C | -2.3937447 | 4.8447464  | -4.3345887 |
| O | -1.4189392 | 4.6276640  | -3.5345423 |
| C | -5.8607830 | 5.9861770  | -4.5769871 |
| C | -5.3808374 | 7.4105014  | -4.5987645 |
| C | -4.2461193 | 7.8429046  | -3.8935288 |
| C | -3.8084789 | 9.1566180  | -4.0022476 |
| C | -4.5058778 | 10.0518441 | -4.8229533 |
| C | -5.6410269 | 9.6396816  | -5.5286263 |
| C | -6.0712947 | 8.3235314  | -5.4062882 |
| C | -2.0096066 | 5.3650938  | -5.7250611 |
| C | -4.4091520 | 5.0855399  | -6.4482090 |
| C | -3.1540196 | 5.9516947  | -6.5520676 |
| S | -6.6288559 | 5.4988131  | -2.9534765 |
| C | -5.6910178 | 6.2573514  | -1.6137747 |
| C | -8.0981692 | 6.5424926  | -2.9267964 |
| C | -4.0510655 | 11.4121048 | -4.9392405 |
| N | -3.6855403 | 12.5070181 | -5.0332887 |
| H | -3.9637613 | 4.1831310  | -3.0797387 |
| H | -5.5289200 | 3.9652360  | -5.0254026 |
| H | -6.7456598 | 5.9107916  | -5.2221337 |
| H | -3.6883163 | 7.1448535  | -3.2804067 |
| H | -2.9285094 | 9.4892085  | -3.4615774 |
| H | -6.1752710 | 10.3406280 | -6.1612380 |
| H | -6.9493912 | 7.9957555  | -5.9558889 |
| H | -1.2116519 | 6.1049599  | -5.5898104 |
| H | -1.5540303 | 4.5208070  | -6.2631068 |
| H | -4.1873484 | 4.1012913  | -6.8804915 |
| H | -5.2256803 | 5.5167917  | -7.0418955 |
| H | -3.3702168 | 6.9714881  | -6.2168353 |
| H | -2.8558579 | 6.0302798  | -7.6044416 |
| H | -6.2139835 | 5.9765745  | -0.6965378 |
| H | -4.6857380 | 5.8361152  | -1.6129409 |
| H | -5.6775329 | 7.3416727  | -1.7293704 |
| H | -8.5738753 | 6.4048924  | -1.9538435 |

|   |            |           |            |
|---|------------|-----------|------------|
| H | -8.7648928 | 6.2014182 | -3.7201972 |
| H | -7.8102764 | 7.5859105 | -3.0722337 |

2a\_sy\_tr\_9.log

E = -1148.919112  
H = -1148.582921  
G = -1148.648765

NImag=0

|   |            |            |            |
|---|------------|------------|------------|
| C | -3.7475695 | 4.8220659  | -3.8861570 |
| C | -4.8710971 | 4.9586428  | -4.8740773 |
| C | -2.4102319 | 5.0733220  | -4.1423116 |
| O | -1.4550810 | 4.9149119  | -3.3053975 |
| C | -5.9300793 | 6.0749653  | -4.5999297 |
| C | -5.4664428 | 7.5086048  | -4.6630252 |
| C | -6.0337754 | 8.3466705  | -5.6311460 |
| C | -5.5839842 | 9.6507431  | -5.7986919 |
| C | -4.5553649 | 10.1266424 | -4.9779878 |
| C | -3.9852887 | 9.3072818  | -3.9963974 |
| C | -4.4413318 | 8.0037697  | -3.8426691 |
| C | -1.9964080 | 5.5342750  | -5.5437830 |
| C | -4.3566380 | 5.1302851  | -6.3194277 |
| C | -3.1345783 | 6.0414931  | -6.4279135 |
| S | -6.9456582 | 5.8505035  | -3.0559608 |
| C | -7.0819472 | 4.0636313  | -2.8581076 |
| C | -5.9607163 | 6.2972656  | -1.6119449 |
| C | -4.0795714 | 11.4747405 | -5.1428937 |
| N | -3.6966886 | 12.5595882 | -5.2761503 |
| H | -3.9869975 | 4.4377146  | -2.8946688 |
| H | -5.4771008 | 4.0416767  | -4.8838329 |
| H | -6.7292122 | 5.9486693  | -5.3405076 |
| H | -6.8261857 | 7.9686437  | -6.2708828 |
| H | -6.0206754 | 10.2942147 | -6.5550557 |
| H | -3.1880782 | 9.6883884  | -3.3668075 |
| H | -3.9760846 | 7.3637053  | -3.1032667 |
| H | -1.2251240 | 6.3042840  | -5.4236689 |
| H | -1.5008205 | 4.6782985  | -6.0251426 |
| H | -4.0765579 | 4.1331051  | -6.6829267 |
| H | -5.1646514 | 5.4893461  | -6.9698312 |
| H | -3.3975292 | 7.0656978  | -6.1429457 |
| H | -2.8092193 | 6.0858920  | -7.4742256 |
| H | -7.7330745 | 3.9024511  | -1.9967466 |
| H | -7.5555438 | 3.6635797  | -3.7563501 |
| H | -6.1006796 | 3.6184973  | -2.6908226 |
| H | -6.5360328 | 5.9408180  | -0.7539190 |
| H | -5.8932643 | 7.3846075  | -1.5746283 |
| H | -4.9784158 | 5.8284077  | -1.6452987 |

2a\_sy\_tr\_9\_ts1.log

E = -1148.895747  
H = -1148.562509  
G = -1148.630080

NImag=1

|   |            |            |            |
|---|------------|------------|------------|
| C | -1.4397388 | -2.0056348 | 0.1216147  |
| C | -1.6869965 | -1.3520789 | -1.0894821 |
| C | -0.3148822 | -2.8612992 | 0.3428319  |
| O | -0.1039240 | -3.4448925 | 1.4247873  |
| C | -1.2015566 | 0.7637680  | -0.9596796 |
| C | 0.0820835  | 0.8884958  | -0.2968395 |
| C | 1.2158325  | 1.2807251  | -1.0466940 |
| C | 2.4797988  | 1.3034677  | -0.4877974 |

|   |            |            |            |
|---|------------|------------|------------|
| C | 2.6499389  | 0.9328402  | 0.8590432  |
| C | 1.5435595  | 0.5467678  | 1.6254066  |
| C | 0.2784934  | 0.5213520  | 1.0518858  |
| C | 0.5968327  | -3.1683602 | -0.8384099 |
| C | -0.8657884 | -1.7332159 | -2.3036826 |
| C | 0.5689270  | -2.1066034 | -1.9345389 |
| S | -2.6210172 | 1.5518683  | -0.2762875 |
| C | -3.3617914 | 0.5622664  | 1.0474465  |
| C | -2.0693205 | 2.9680495  | 0.7064649  |
| C | 3.9558224  | 0.9586048  | 1.4496281  |
| N | 5.0136437  | 0.9806074  | 1.9251725  |
| H | -2.1247699 | -1.8949049 | 0.9584656  |
| H | -2.7173449 | -1.0838788 | -1.3177173 |
| H | -1.1984385 | 1.0590278  | -2.0079730 |
| H | 1.0852947  | 1.5645681  | -2.0876627 |
| H | 3.3382119  | 1.6109051  | -1.0769123 |
| H | 1.6791079  | 0.2596756  | 2.6635641  |
| H | -0.5604088 | 0.2029636  | 1.6602218  |
| H | 1.6105801  | -3.3251171 | -0.4560661 |
| H | 0.2575749  | -4.1332295 | -1.2431590 |
| H | -1.3591838 | -2.6030938 | -2.7634004 |
| H | -0.8819301 | -0.9338586 | -3.0503189 |
| H | 1.0996239  | -1.2156055 | -1.5855793 |
| H | 1.1005017  | -2.4666858 | -2.8220047 |
| H | -4.1734332 | 1.1767952  | 1.4443705  |
| H | -3.7786769 | -0.3458772 | 0.6132617  |
| H | -2.6427902 | 0.3369899  | 1.8341356  |
| H | -2.9617111 | 3.4510301  | 1.1099902  |
| H | -1.5452944 | 3.6479181  | 0.0331550  |
| H | -1.4131210 | 2.6360095  | 1.5126672  |

2a\_sy\_tr\_prod\_1.log

E = -671.042180

H = -670.789954

G = -670.845110

NImag=0

|   |            |            |            |
|---|------------|------------|------------|
| C | 0.5915044  | -1.4513059 | 2.0663000  |
| C | 0.4870547  | -1.9850483 | 0.6640185  |
| C | 0.6445637  | -0.5052074 | 0.8604211  |
| C | -0.4823243 | 0.4359548  | 0.6340155  |
| C | -1.8164743 | 0.0817151  | 0.8876728  |
| C | -2.8476395 | 0.9802840  | 0.6528018  |
| C | -2.5526112 | 2.2573625  | 0.1566391  |
| C | -1.2278851 | 2.6291203  | -0.1007578 |
| C | -0.2068136 | 1.7185105  | 0.1398569  |
| H | 1.6172559  | -0.0809042 | 0.6308342  |
| H | -0.3059806 | -1.3730711 | 2.6735951  |
| H | -0.5055733 | -2.3142706 | 0.3660300  |
| C | 1.6405578  | -2.7954055 | 0.1031882  |
| C | 2.9960435  | -2.3562832 | 0.6600817  |
| C | 3.0035628  | -2.3670324 | 2.1895331  |
| C | 1.8394452  | -1.6602898 | 2.8528889  |
| O | 1.8906454  | -1.3334100 | 4.0284982  |
| C | -3.6172701 | 3.1908381  | -0.0880807 |
| N | -4.4758676 | 3.9435346  | -0.2856523 |
| H | -2.0603692 | -0.9039898 | 1.2736787  |
| H | -3.8775740 | 0.7007477  | 0.8498861  |
| H | -1.0057497 | 3.6197407  | -0.4841184 |
| H | 0.8222944  | 2.0037766  | -0.0585156 |
| H | 1.4729880  | -3.8500160 | 0.3555211  |
| H | 1.6407050  | -2.7204458 | -0.9895827 |



|   |           |            |           |
|---|-----------|------------|-----------|
| H | 3.2553510 | -1.3588905 | 0.2896433 |
| H | 3.7747418 | -3.0321812 | 0.2950068 |
| H | 3.9320782 | -1.9613988 | 2.6009647 |
| H | 2.9270409 | -3.4062342 | 2.5429316 |

2a\_sy\_tr\_prod\_3.log

E = -671.041285  
H = -670.788923  
G = -670.843842

NImag=0

|   |            |            |            |
|---|------------|------------|------------|
| C | 1.3192449  | -0.6700549 | 1.9647143  |
| C | 0.3991653  | -1.8145631 | 1.6046674  |
| C | 0.4935873  | -0.6403074 | 0.6765049  |
| C | -0.6045402 | 0.3494124  | 0.5356714  |
| C | -0.8304809 | 0.9381371  | -0.7164495 |
| C | -1.8524569 | 1.8606063  | -0.9011284 |
| C | -2.6673631 | 2.2069202  | 0.1830539  |
| C | -2.4556853 | 1.6300822  | 1.4425232  |
| C | -1.4308159 | 0.7095751  | 1.6113245  |
| H | 1.0510876  | -0.8163052 | -0.2402569 |
| H | 1.0129314  | 0.0253576  | 2.7407802  |
| H | -0.5104738 | -1.8597960 | 2.1976865  |
| C | 0.9915450  | -3.1556189 | 1.1741983  |
| C | 2.4745131  | -3.2920056 | 1.5230782  |
| C | 3.2648143  | -2.0568364 | 1.0687917  |
| C | 2.7898841  | -0.8437863 | 1.8343426  |
| O | 3.5633235  | -0.0603603 | 2.3640070  |
| C | -3.7278905 | 3.1599921  | 0.0046510  |
| N | -4.5833694 | 3.9281899  | -0.1394944 |
| H | -0.1960301 | 0.6669580  | -1.5552702 |
| H | -2.0208640 | 2.3112770  | -1.8737969 |
| H | -3.0915803 | 1.9050687  | 2.2777311  |
| H | -1.2795565 | 0.2724886  | 2.5942913  |
| H | 0.4263275  | -3.9592712 | 1.6543388  |
| H | 0.8635192  | -3.2766322 | 0.0919554  |
| H | 2.8891021  | -4.1895867 | 1.0546923  |
| H | 2.5902830  | -3.4094991 | 2.6077132  |
| H | 3.1032293  | -1.8893965 | -0.0049388 |
| H | 4.3386493  | -2.1667455 | 1.2372178  |

2b.log

E = -347.855437  
H = -347.690745  
G = -347.731078

NImag=0

|   |            |            |            |
|---|------------|------------|------------|
| C | 0.8952271  | 0.2843500  | -0.4020630 |
| C | 0.0039541  | 1.2924400  | -0.4367416 |
| C | -1.4655308 | 1.1422791  | -0.1700155 |
| C | -1.9264668 | -0.3022852 | -0.3443040 |
| C | -0.9969251 | -1.2454835 | 0.4154540  |
| C | 0.4455706  | -1.0786348 | -0.0080732 |
| O | 1.2321354  | -2.0160804 | 0.0166274  |
| C | 2.3556171  | 0.4575947  | -0.7062614 |
| H | 0.3646031  | 2.2939571  | -0.6722376 |
| H | -1.6722655 | 1.4836877  | 0.8555092  |
| H | -2.0222695 | 1.8138900  | -0.8317698 |
| H | -2.9559419 | -0.4230907 | 0.0048668  |
| H | -1.9098068 | -0.5591918 | -1.4107904 |
| H | -1.0368662 | -1.0151381 | 1.4905999  |
| H | -1.2731020 | -2.2959648 | 0.2926920  |

|   |           |            |            |
|---|-----------|------------|------------|
| H | 2.5745812 | 1.4975140  | -0.9606988 |
| H | 2.9719227 | 0.1675969  | 0.1510585  |
| H | 2.6577623 | -0.1786401 | -1.5444497 |

2b\_sy\_c\_1.log

E = -1188.221650  
H = -1187.856160  
G = -1187.925979

NImag=0

|   |            |            |            |
|---|------------|------------|------------|
| C | -3.5134020 | 0.0827856  | -2.3470084 |
| C | -4.5565140 | -0.2039919 | -1.2942134 |
| C | -3.7000925 | -0.1701248 | -3.6942045 |
| O | -2.8341971 | 0.1010192  | -4.6018838 |
| C | -5.3913110 | 1.0304912  | -0.8133668 |
| C | -5.9714991 | 0.8679584  | 0.5688985  |
| C | -5.1407912 | 0.6540852  | 1.6770170  |
| C | -5.6853794 | 0.4941940  | 2.9446222  |
| C | -7.0763716 | 0.5381164  | 3.1033515  |
| C | -7.9183940 | 0.7460748  | 2.0052613  |
| C | -7.3579307 | 0.9159661  | 0.7442658  |
| C | -4.9753133 | -0.8674870 | -4.1737195 |
| C | -5.5740009 | -1.2579585 | -1.7620739 |
| C | -6.1106374 | -0.9251921 | -3.1535523 |
| S | -4.3742303 | 2.5839672  | -0.8403153 |
| C | -4.4977046 | 3.1188099  | -2.5630936 |
| C | -5.5082682 | 3.7735650  | -0.0929399 |
| C | -7.6462920 | 0.3671975  | 4.4135220  |
| N | -8.1052397 | 0.2299067  | 5.4678973  |
| C | -2.1736294 | 0.6309662  | -1.9126977 |
| H | -4.0550330 | -0.5855387 | -0.3930940 |
| H | -6.1936924 | 1.2516407  | -1.5252361 |
| H | -4.0608241 | 0.6151296  | 1.5557366  |
| H | -5.0450044 | 0.3343207  | 3.8057084  |
| H | -8.9941970 | 0.7779849  | 2.1419819  |
| H | -8.0022815 | 1.0845604  | -0.1141027 |
| H | -5.3055546 | -0.3704759 | -5.0938676 |
| H | -4.6852648 | -1.8874272 | -4.4669110 |
| H | -5.0649332 | -2.2294079 | -1.7937114 |
| H | -6.3968545 | -1.3481042 | -1.0411425 |
| H | -6.6323112 | 0.0407824  | -3.1302044 |
| H | -6.8585581 | -1.6681602 | -3.4538760 |
| H | -4.1277184 | 4.1459074  | -2.5967058 |
| H | -3.8795374 | 2.4578683  | -3.1703516 |
| H | -5.5445996 | 3.0728713  | -2.8717421 |
| H | -5.0839897 | 4.7636208  | -0.2723238 |
| H | -5.5549430 | 3.5806384  | 0.9792579  |
| H | -6.4939171 | 3.6846348  | -0.5550735 |
| H | -2.0426880 | 0.5594399  | -0.8252540 |
| H | -1.3542233 | 0.0745071  | -2.3871672 |
| H | -1.9973764 | 1.6866581  | -2.1863874 |

2b\_sy\_c\_10.log

E = -1188.216412  
H = -1187.851205  
G = -1187.921139

NImag=0

|   |            |            |            |
|---|------------|------------|------------|
| C | -4.9541890 | 0.3712281  | -2.7642100 |
| C | -4.0517811 | 0.9576228  | -1.7044311 |
| C | -5.2469402 | -0.9775055 | -2.8880706 |
| O | -5.9853550 | -1.4845346 | -3.8078429 |

|   |            |            |            |
|---|------------|------------|------------|
| C | -4.8742215 | 1.9964012  | -0.8607025 |
| C | -5.7141159 | 1.4093807  | 0.2416870  |
| C | -5.2345418 | 1.2008372  | 1.5391814  |
| C | -6.0199605 | 0.5594185  | 2.4889411  |
| C | -7.2992267 | 0.1153626  | 2.1336848  |
| C | -7.7980151 | 0.3273078  | 0.8429714  |
| C | -7.0051079 | 0.9809617  | -0.0920876 |
| C | -4.6229242 | -1.9721805 | -1.9078383 |
| C | -3.3297769 | -0.0991484 | -0.8515827 |
| C | -4.1710612 | -1.3491428 | -0.5926573 |
| S | -3.8990215 | 3.4411853  | -0.2135426 |
| C | -2.2082600 | 2.8928046  | 0.1046705  |
| C | -3.6517215 | 4.3835630  | -1.7312337 |
| C | -8.1146783 | -0.5554491 | 3.1106943  |
| N | -8.7711406 | -1.0950452 | 3.8976917  |
| C | -5.5196252 | 1.3435802  | -3.7677239 |
| H | -3.2814462 | 1.5623371  | -2.2113140 |
| H | -5.5379070 | 2.5302473  | -1.5496983 |
| H | -4.2355046 | 1.5174674  | 1.8274643  |
| H | -5.6458245 | 0.3965397  | 3.4941174  |
| H | -8.7950510 | -0.0115104 | 0.5816188  |
| H | -7.3870205 | 1.1584567  | -1.0934722 |
| H | -5.3599311 | -2.7636926 | -1.7294338 |
| H | -3.7689931 | -2.4517040 | -2.4097005 |
| H | -2.4248684 | -0.4001314 | -1.3958427 |
| H | -2.9901095 | 0.3254783  | 0.0998541  |
| H | -5.0511644 | -1.0991628 | 0.0108604  |
| H | -3.5825374 | -2.0660908 | -0.0074087 |
| H | -1.6319938 | 3.8070160  | 0.2635144  |
| H | -2.1978572 | 2.2935490  | 1.0150601  |
| H | -1.8159361 | 2.3370788  | -0.7474397 |
| H | -3.0105621 | 5.2305417  | -1.4799212 |
| H | -4.6291148 | 4.7403744  | -2.0600095 |
| H | -3.1825694 | 3.7552469  | -2.4901593 |
| H | -5.7026077 | 0.8362255  | -4.7202660 |
| H | -6.4816363 | 1.7956275  | -3.4678121 |
| H | -4.8305009 | 2.1814583  | -3.9514105 |

2b\_sy\_c\_10\_ts1.log

E = -1188.195169

H = -1187.832421

G = -1187.902587

NImag=1

|   |            |            |            |
|---|------------|------------|------------|
| C | -0.9086611 | 2.1972605  | -0.2774376 |
| C | -1.4243817 | 1.1872251  | 0.5481588  |
| C | 0.3444176  | 2.8330733  | -0.0106425 |
| O | 0.8492801  | 3.6827046  | -0.7775852 |
| C | -1.2663181 | -0.5900646 | -0.5922068 |
| C | 0.1234120  | -0.9679894 | -0.5612319 |
| C | 0.6468407  | -1.9714344 | 0.2888029  |
| C | 2.0105587  | -2.1624140 | 0.4137710  |
| C | 2.9026545  | -1.3427818 | -0.3024209 |
| C | 2.4052862  | -0.3554282 | -1.1686911 |
| C | 1.0387931  | -0.1802139 | -1.3036456 |
| C | 1.0258289  | 2.5682550  | 1.3259469  |
| C | -0.7767473 | 0.8905701  | 1.8831259  |
| C | 0.7219812  | 1.1941077  | 1.9129608  |
| S | -2.4311779 | -1.8973732 | -0.2428905 |
| C | -3.0144973 | -1.7114440 | 1.4624743  |
| C | -3.8810963 | -1.2914202 | -1.1255077 |
| C | 4.3149644  | -1.5277101 | -0.1609228 |

|   |            |            |            |
|---|------------|------------|------------|
| N | 5.4600310  | -1.6782505 | -0.0452374 |
| C | -1.6325259 | 2.5653591  | -1.5435749 |
| H | -2.5082224 | 1.0650773  | 0.5339338  |
| H | -1.6033811 | -0.1135408 | -1.5113708 |
| H | -0.0200523 | -2.5986114 | 0.8769309  |
| H | 2.3977217  | -2.9342484 | 1.0717082  |
| H | 3.0960442  | 0.2636624  | -1.7334602 |
| H | 0.6567806  | 0.5739703  | -1.9850429 |
| H | 2.1026578  | 2.7137604  | 1.1913075  |
| H | 0.6825161  | 3.3545852  | 2.0143659  |
| H | -1.2897337 | 1.5102027  | 2.6341800  |
| H | -0.9491090 | -0.1500748 | 2.1748268  |
| H | 1.2658970  | 0.4339658  | 1.3445439  |
| H | 1.0848650  | 1.1353457  | 2.9451295  |
| H | -3.8494691 | -2.4075855 | 1.5703375  |
| H | -2.2064800 | -2.0092810 | 2.1316332  |
| H | -3.3375143 | -0.6879288 | 1.6542731  |
| H | -4.7217431 | -1.9358832 | -0.8641926 |
| H | -3.6702500 | -1.3625051 | -2.1932887 |
| H | -4.0746870 | -0.2575500 | -0.8317712 |
| H | -1.6410946 | 3.6485581  | -1.7045510 |
| H | -1.1564004 | 2.1233761  | -2.4333999 |
| H | -2.6694590 | 2.2114908  | -1.5192570 |

2b\_sy\_c\_11.log

E = -1188.216023

H = -1187.850815

G = -1187.921224

NImag=0

|   |            |            |            |
|---|------------|------------|------------|
| C | -3.6309458 | 0.2629151  | -2.6547152 |
| C | -4.3543469 | -0.0539326 | -1.3648196 |
| C | -4.1982293 | -0.0424499 | -3.8815393 |
| O | -3.7223160 | 0.2693496  | -5.0293781 |
| C | -5.3633326 | 1.0558505  | -0.9287224 |
| C | -5.9694651 | 0.9115975  | 0.4452110  |
| C | -5.1960271 | 0.5326018  | 1.5505786  |
| C | -5.7769834 | 0.3960546  | 2.8058635  |
| C | -7.1472732 | 0.6359044  | 2.9585782  |
| C | -7.9368207 | 1.0056361  | 1.8636186  |
| C | -7.3409847 | 1.1399425  | 0.6157328  |
| C | -5.4634772 | -0.9055228 | -3.8424671 |
| C | -5.1759317 | -1.3851366 | -1.3874444 |
| C | -5.3071797 | -1.9982085 | -2.7844521 |
| S | -4.5833234 | 2.7203797  | -1.1694396 |
| C | -5.8320819 | 3.8628806  | -0.5508072 |
| C | -3.3468902 | 2.8501108  | 0.1349259  |
| C | -7.7520863 | 0.4953517  | 4.2566445  |
| N | -8.2383639 | 0.3836422  | 5.3017180  |
| C | -2.2828191 | 0.9363860  | -2.5993609 |
| H | -3.6049367 | -0.1247210 | -0.5653365 |
| H | -6.1635329 | 1.1025085  | -1.6784431 |
| H | -4.1339082 | 0.3367496  | 1.4412863  |
| H | -5.1778909 | 0.1029250  | 3.6614930  |
| H | -8.9994749 | 1.1823338  | 1.9925267  |
| H | -7.9474985 | 1.4233081  | -0.2403158 |
| H | -6.3550291 | -0.2986788 | -3.6216901 |
| H | -5.6033912 | -1.3355494 | -4.8396597 |
| H | -4.7179364 | -2.1046281 | -0.7005804 |
| H | -6.1868037 | -1.2008415 | -1.0022666 |
| H | -6.1556451 | -2.6928574 | -2.7955387 |
| H | -4.4116020 | -2.5836695 | -3.0257262 |

|   |            |           |            |
|---|------------|-----------|------------|
| H | -5.4182050 | 4.8671277 | -0.6633673 |
| H | -6.7191690 | 3.7575619 | -1.1785214 |
| H | -6.0593141 | 3.6550009 | 0.4960149  |
| H | -2.8494925 | 3.8119755 | -0.0064782 |
| H | -2.6279568 | 2.0394501 | 0.0066738  |
| H | -3.8270876 | 2.8057381 | 1.1138906  |
| H | -1.6926829 | 0.6544423 | -3.4792114 |
| H | -2.3018799 | 2.0418916 | -2.5968654 |
| H | -1.7203847 | 0.6361800 | -1.7040094 |

2b\_sy\_c\_12.log

E = -1188.216527  
H = -1187.851196  
G = -1187.922003

NImag=0

|   |            |            |            |
|---|------------|------------|------------|
| C | -5.4529100 | -0.2260347 | -2.5081252 |
| C | -4.6736725 | 1.0526319  | -2.2933912 |
| C | -4.8654965 | -1.4757626 | -2.6210348 |
| O | -5.4976705 | -2.5822319 | -2.7823119 |
| C | -5.4017313 | 1.9210282  | -1.2205393 |
| C | -5.8550378 | 1.3051281  | 0.0815030  |
| C | -5.0916529 | 0.3792558  | 0.8058504  |
| C | -5.5661918 | -0.1521319 | 1.9989452  |
| C | -6.8190512 | 0.2439112  | 2.4816593  |
| C | -7.5981814 | 1.1633692  | 1.7728591  |
| C | -7.1108593 | 1.6809849  | 0.5781762  |
| C | -3.3370602 | -1.5782173 | -2.5897898 |
| C | -3.1746167 | 0.8385285  | -2.0347941 |
| C | -2.6360631 | -0.2683003 | -2.9332967 |
| S | -4.4180039 | 3.4827335  | -0.9457838 |
| C | -5.6384708 | 4.6206978  | -0.2641718 |
| C | -3.4072621 | 3.1900079  | 0.5181775  |
| C | -7.3117759 | -0.3036734 | 3.7179279  |
| N | -7.7083418 | -0.7424158 | 4.7136168  |
| C | -6.9337977 | -0.0733120 | -2.7360688 |
| H | -4.7447804 | 1.6846651  | -3.2006669 |
| H | -6.2883424 | 2.3451886  | -1.7054494 |
| H | -4.1196522 | 0.0598766  | 0.4515365  |
| H | -4.9724416 | -0.8707738 | 2.5538267  |
| H | -8.5713779 | 1.4606050  | 2.1490382  |
| H | -7.7224348 | 2.3818988  | 0.0154233  |
| H | -3.0169167 | -1.9223301 | -1.5944886 |
| H | -3.0591914 | -2.3697670 | -3.2952035 |
| H | -2.6265497 | 1.7738593  | -2.2107737 |
| H | -2.9808777 | 0.5465199  | -0.9979838 |
| H | -1.5506297 | -0.3583659 | -2.8104250 |
| H | -2.8223198 | -0.0109859 | -3.9849757 |
| H | -5.1154273 | 5.5551821  | -0.0510107 |
| H | -6.4021749 | 4.7869822  | -1.0255951 |
| H | -6.0696795 | 4.2058389  | 0.6485611  |
| H | -2.8777105 | 4.1253449  | 0.7119094  |
| H | -2.6906649 | 2.3988737  | 0.2962657  |
| H | -4.0453992 | 2.9259562  | 1.3631720  |
| H | -7.3342300 | -1.0032653 | -3.1501600 |
| H | -7.5158574 | 0.1508970  | -1.8259147 |
| H | -7.1540945 | 0.7418026  | -3.4448937 |

2b\_sy\_c\_13.log

E = -1188.214075  
H = -1187.848722

G = -1187.918435  
NImag=0

|   |            |            |            |
|---|------------|------------|------------|
| C | -5.1719817 | 0.3626939  | -2.7051099 |
| C | -4.2028225 | 0.8806693  | -1.6600567 |
| C | -5.3051051 | -0.9781974 | -3.0339881 |
| O | -6.1214347 | -1.4425246 | -3.9094320 |
| C | -4.9258189 | 1.9552480  | -0.7773801 |
| C | -5.7510499 | 1.4037976  | 0.3581205  |
| C | -5.2582520 | 1.2396795  | 1.6570278  |
| C | -6.0451589 | 0.6616797  | 2.6455103  |
| C | -7.3388089 | 0.2315409  | 2.3272773  |
| C | -7.8455497 | 0.3864834  | 1.0322200  |
| C | -7.0503082 | 0.9771646  | 0.0573308  |
| C | -4.3978478 | -2.0093577 | -2.3561622 |
| C | -3.5853507 | -0.2394116 | -0.8162699 |
| C | -3.1592843 | -1.3986856 | -1.7098008 |
| S | -3.8515656 | 3.3395491  | -0.1720930 |
| C | -2.1826930 | 2.7084462  | 0.0997477  |
| C | -3.6027122 | 4.2670195  | -1.6977883 |
| C | -8.1580302 | -0.3713182 | 3.3445729  |
| N | -8.8177071 | -0.8568144 | 4.1634692  |
| C | -5.9042885 | 1.3905780  | -3.5285104 |
| H | -3.3833495 | 1.4249547  | -2.1644063 |
| H | -5.5936038 | 2.5322592  | -1.4261919 |
| H | -4.2485137 | 1.5478202  | 1.9171308  |
| H | -5.6617908 | 0.5373373  | 3.6526982  |
| H | -8.8516123 | 0.0548219  | 0.7977442  |
| H | -7.4410734 | 1.1135504  | -0.9467784 |
| H | -4.9809371 | -2.5572135 | -1.6010007 |
| H | -4.1231693 | -2.7409892 | -3.1248996 |
| H | -2.7426102 | 0.1333010  | -0.2245671 |
| H | -4.3309550 | -0.6206980 | -0.1072330 |
| H | -2.6141399 | -2.1477216 | -1.1239939 |
| H | -2.4723740 | -1.0346025 | -2.4864649 |
| H | -1.5727285 | 3.5876157  | 0.3194299  |
| H | -2.1930662 | 2.0457518  | 0.9652779  |
| H | -1.8147311 | 2.2014668  | -0.7928277 |
| H | -2.9195201 | 5.0851665  | -1.4623598 |
| H | -4.5713618 | 4.6666136  | -2.0024421 |
| H | -3.1790497 | 3.6178133  | -2.4657588 |
| H | -6.1993128 | 0.9478447  | -4.4847015 |
| H | -6.8276077 | 1.7832677  | -3.0669980 |
| H | -5.2719232 | 2.2680997  | -3.7373423 |

2b\_sy\_c\_1\_ts1.log  
E = -1188.197351  
H = -1187.835076  
G = -1187.906244  
NImag=1

|   |            |            |            |
|---|------------|------------|------------|
| C | 2.2751903  | -0.6482451 | 1.0657354  |
| C | 1.0555849  | -1.0253798 | 0.4799162  |
| C | 3.5286307  | -1.0150100 | 0.4836580  |
| O | 4.6249757  | -0.6666308 | 0.9733134  |
| C | 0.0539283  | 0.5106745  | -0.6438502 |
| C | -1.3462567 | 0.2603693  | -0.3711050 |
| C | -1.9685215 | 0.6132981  | 0.8513312  |
| C | -3.2817649 | 0.2638674  | 1.1174954  |
| C | -4.0197552 | -0.4664836 | 0.1728017  |
| C | -3.4204722 | -0.8402711 | -1.0420195 |
| C | -2.1107537 | -0.4797718 | -1.3046218 |
| C | 3.5416438  | -1.9190698 | -0.7436032 |

|   |            |            |            |
|---|------------|------------|------------|
| C | 1.0491138  | -2.0777890 | -0.6028614 |
| C | 2.2395034  | -1.8942445 | -1.5385246 |
| S | 0.6776737  | 2.0334350  | -0.0036408 |
| C | 2.3127648  | 2.1147928  | -0.7556054 |
| C | -0.1466287 | 3.3429012  | -0.9468599 |
| C | -5.3779610 | -0.8276604 | 0.4453938  |
| N | -6.4789584 | -1.1209746 | 0.6656357  |
| C | 2.3080147  | 0.2044233  | 2.3085319  |
| H | 0.1903839  | -1.0321423 | 1.1454613  |
| H | 0.3544858  | 0.3948455  | -1.6860623 |
| H | -1.4161581 | 1.1671470  | 1.6066582  |
| H | -3.7418038 | 0.5485298  | 2.0587675  |
| H | -3.9909877 | -1.4017064 | -1.7754465 |
| H | -1.6598667 | -0.7581317 | -2.2531822 |
| H | 4.3979453  | -1.6309035 | -1.3620455 |
| H | 3.7401729  | -2.9394602 | -0.3844695 |
| H | 1.1149139  | -3.0626742 | -0.1167562 |
| H | 0.1029336  | -2.0621510 | -1.1530612 |
| H | 2.1445440  | -0.9290300 | -2.0537878 |
| H | 2.2477125  | -2.6714911 | -2.3098939 |
| H | 2.7245241  | 3.0979574  | -0.5214304 |
| H | 2.9303729  | 1.3322735  | -0.3159965 |
| H | 2.2139453  | 1.9808939  | -1.8350957 |
| H | 0.3188717  | 4.2948891  | -0.6806985 |
| H | -1.1975478 | 3.3464625  | -0.6518896 |
| H | -0.0421505 | 3.1357806  | -2.0137181 |
| H | 1.2997803  | 0.3405435  | 2.7152652  |
| H | 2.9325342  | -0.2479840 | 3.0884477  |
| H | 2.7312894  | 1.2035684  | 2.1256030  |

2b\_sy\_c\_2.log

E = -1188.221040

H = -1187.855708

G = -1187.925393

NImag=0

|   |            |            |            |
|---|------------|------------|------------|
| C | -3.6086826 | -0.0656490 | -2.0767893 |
| C | -4.9668080 | -0.3540228 | -1.4792871 |
| C | -3.3710984 | -0.0673833 | -3.4443788 |
| O | -2.2328682 | 0.1152792  | -4.0028303 |
| C | -5.7340166 | 0.9142246  | -0.9467330 |
| C | -6.1672762 | 0.8272232  | 0.4941824  |
| C | -7.5137316 | 1.0048984  | 0.8258220  |
| C | -7.9349833 | 0.9174878  | 2.1486724  |
| C | -6.9913953 | 0.6606011  | 3.1486979  |
| C | -5.6375861 | 0.4835630  | 2.8325828  |
| C | -5.2350525 | 0.5606359  | 1.5063214  |
| C | -4.5292917 | -0.3481461 | -4.4109089 |
| C | -5.8977452 | -1.0993309 | -2.4441144 |
| C | -5.9303462 | -0.4026090 | -3.8004846 |
| S | -4.6786508 | 2.4281723  | -1.1719208 |
| C | -5.0523303 | 2.9533017  | -2.8582358 |
| C | -5.6565563 | 3.6729683  | -0.2926575 |
| C | -7.4166135 | 0.5729906  | 4.5205947  |
| N | -7.7587865 | 0.5032193  | 5.6247804  |
| C | -2.4576307 | 0.0179108  | -1.1086769 |
| H | -4.8204868 | -0.9886137 | -0.5933976 |
| H | -6.6113954 | 1.1316342  | -1.5659405 |
| H | -8.2378827 | 1.2121525  | 0.0430390  |
| H | -8.9803060 | 1.0503455  | 2.4068009  |
| H | -4.9175077 | 0.2829544  | 3.6187671  |
| H | -4.1867502 | 0.4108226  | 1.2589079  |

|   |            |            |            |
|---|------------|------------|------------|
| H | -4.4831086 | 0.4008712  | -5.2120529 |
| H | -4.2962040 | -1.3111999 | -4.8877353 |
| H | -5.5203757 | -2.1223559 | -2.5669803 |
| H | -6.9063796 | -1.1740897 | -2.0164969 |
| H | -6.3270867 | 0.6139192  | -3.6783674 |
| H | -6.6209482 | -0.9174141 | -4.4782839 |
| H | -4.6237054 | 3.9514297  | -2.9736929 |
| H | -4.5687478 | 2.2558627  | -3.5413786 |
| H | -6.1350776 | 2.9788805  | -2.9999616 |
| H | -5.2330399 | 4.6444030  | -0.5558980 |
| H | -5.5474510 | 3.5044570  | 0.7793232  |
| H | -6.7040941 | 3.6150247  | -0.5964969 |
| H | -1.5286669 | 0.1984941  | -1.6572673 |
| H | -2.5592088 | 0.8189260  | -0.3591100 |
| H | -2.3366268 | -0.9154389 | -0.5338146 |

2b\_sy\_c\_3.log

E = -1188.216998  
H = -1187.851814  
G = -1187.921815

NImag=0

|   |            |            |            |
|---|------------|------------|------------|
| C | -3.9869875 | -0.1377382 | -1.9535187 |
| C | -5.4811875 | 0.0171011  | -1.7671814 |
| C | -3.3870595 | -0.3371282 | -3.1918877 |
| O | -2.1269511 | -0.4685051 | -3.3796907 |
| C | -5.8964420 | 1.3006016  | -0.9511333 |
| C | -6.1680397 | 1.0596496  | 0.5181631  |
| C | -5.1963131 | 1.1343326  | 1.5220255  |
| C | -5.5192985 | 0.8456385  | 2.8431027  |
| C | -6.8264144 | 0.4663975  | 3.1656926  |
| C | -7.8100170 | 0.3837771  | 2.1731022  |
| C | -7.4746770 | 0.6871404  | 0.8602930  |
| C | -4.2716657 | -0.4658909 | -4.4358549 |
| C | -6.2868871 | 0.0144487  | -3.0797540 |
| C | -5.6864208 | -0.9324660 | -4.1075256 |
| S | -4.6131129 | 2.6057918  | -1.1567523 |
| C | -4.7890045 | 3.1137779  | -2.8786518 |
| C | -5.4323421 | 4.0116139  | -0.3651096 |
| C | -7.1645453 | 0.1659547  | 4.5311030  |
| N | -7.4376239 | -0.0753959 | 5.6304635  |
| C | -3.1495043 | -0.3313820 | -0.7136079 |
| H | -5.8578984 | -0.8124759 | -1.1430591 |
| H | -6.8016174 | 1.7381357  | -1.3894893 |
| H | -4.1734797 | 1.4196174  | 1.2929548  |
| H | -4.7639976 | 0.9106799  | 3.6191445  |
| H | -8.8232389 | 0.0947437  | 2.4319408  |
| H | -8.2368900 | 0.6353184  | 0.0876041  |
| H | -4.3138814 | 0.4988149  | -4.9648473 |
| H | -3.7650048 | -1.1674928 | -5.1078263 |
| H | -7.3295534 | -0.2399200 | -2.8536797 |
| H | -6.3003582 | 1.0211351  | -3.5154978 |
| H | -6.3118221 | -0.9602102 | -5.0076080 |
| H | -5.6556886 | -1.9535153 | -3.7034277 |
| H | -4.2035020 | 4.0300338  | -2.9842739 |
| H | -4.3704635 | 2.3252512  | -3.5035344 |
| H | -5.8412099 | 3.2992138  | -3.1030464 |
| H | -4.8499574 | 4.8994867  | -0.6190012 |
| H | -5.4150525 | 3.8583615  | 0.7144603  |
| H | -6.4562291 | 4.1025513  | -0.7331786 |
| H | -2.2594302 | -0.9177602 | -0.9670600 |
| H | -2.7801785 | 0.5950846  | -0.2434673 |



H           -3.7083524           -0.8710727           0.0658145

2b\_sy\_c\_3\_ts1.log

E =       -1188.192173

H =       -1187.829663

G =       -1187.900576

NImag=1

|   |            |            |            |
|---|------------|------------|------------|
| C | -1.8059625 | -1.0354718 | -0.8048010 |
| C | -1.1164129 | -1.0385796 | 0.4200153  |
| C | -3.2356682 | -1.0214503 | -0.8605867 |
| O | -3.8755334 | -0.9163086 | -1.9292488 |
| C | -0.0029804 | 0.7690358  | 0.7738735  |
| C | 1.3670340  | 0.4193859  | 0.4718526  |
| C | 1.9458320  | 0.5155572  | -0.8159585 |
| C | 3.2307346  | 0.0616020  | -1.0626435 |
| C | 3.9826180  | -0.5206776 | -0.0300748 |
| C | 3.4232086  | -0.6435223 | 1.2533384  |
| C | 2.1420042  | -0.1816080 | 1.4938880  |
| C | -4.0174401 | -1.2414328 | 0.4333922  |
| C | -1.8952374 | -1.1383572 | 1.7227045  |
| C | -3.1893605 | -1.9253931 | 1.5180655  |
| S | -0.7445205 | 1.9559272  | -0.2942759 |
| C | -2.3344765 | 2.2347047  | 0.4986357  |
| C | 0.0629857  | 3.5351808  | 0.0730896  |
| C | 5.3102270  | -0.9906527 | -0.2840991 |
| N | 6.3869170  | -1.3722894 | -0.4892363 |
| C | -1.0437240 | -1.0833021 | -2.1040596 |
| H | -0.1429953 | -1.5293247 | 0.4158287  |
| H | -0.2129701 | 0.9986201  | 1.8186615  |
| H | 1.3865798  | 0.9491976  | -1.6413527 |
| H | 3.6582399  | 0.1524506  | -2.0564074 |
| H | 4.0007094  | -1.0967527 | 2.0531549  |
| H | 1.7180493  | -0.2755218 | 2.4901810  |
| H | -4.3759586 | -0.2689866 | 0.8020839  |
| H | -4.9078537 | -1.8224774 | 0.1719075  |
| H | -1.2640029 | -1.5899172 | 2.4949946  |
| H | -2.1684753 | -0.1396555 | 2.0831058  |
| H | -3.7512380 | -1.9763220 | 2.4572169  |
| H | -2.9603611 | -2.9549168 | 1.2168300  |
| H | -2.7997547 | 3.0837363  | -0.0050878 |
| H | -2.9404516 | 1.3415421  | 0.3545681  |
| H | -2.1791002 | 2.4473399  | 1.5583114  |
| H | -0.4468079 | 4.3151460  | -0.4971708 |
| H | 1.1018767  | 3.4551595  | -0.2522592 |
| H | 0.0058031  | 3.7276501  | 1.1459343  |
| H | -1.5377136 | -1.7430388 | -2.8262982 |
| H | -0.9598886 | -0.1004907 | -2.5890646 |
| H | -0.0230974 | -1.4495710 | -1.9398172 |

2b\_sy\_c\_3\_ts2.log

E =       -1188.204776

H =       -1187.841034

G =       -1187.912026

NImag=1

|   |            |            |            |
|---|------------|------------|------------|
| C | -1.8193658 | -1.3798949 | 0.7532001  |
| C | -2.0692576 | -0.3165142 | -0.2994635 |
| C | -0.9748546 | -2.4689311 | 0.4933008  |
| O | -0.6168836 | -3.3082813 | 1.3709570  |
| C | -1.0050863 | 0.5771954  | 0.2612948  |
| C | 0.4686841  | 0.3256196  | 0.1273766  |

|   |            |            |            |
|---|------------|------------|------------|
| C | 1.1615649  | 0.4425780  | -1.0852822 |
| C | 2.5352046  | 0.2314755  | -1.1408104 |
| C | 3.2299753  | -0.0946432 | 0.0279656  |
| C | 2.5582319  | -0.1927150 | 1.2540508  |
| C | 1.1894074  | 0.0310813  | 1.2940734  |
| C | -0.5231757 | -2.6827236 | -0.9486240 |
| C | -1.9357637 | -0.7502248 | -1.7742331 |
| C | -1.5976639 | -2.2345430 | -1.9403043 |
| S | -1.1881629 | 2.5855514  | -0.6041588 |
| C | -2.8195661 | 2.9742208  | 0.0630440  |
| C | -0.1454587 | 3.4566736  | 0.5854575  |
| C | 4.6498993  | -0.3170679 | -0.0275850 |
| N | 5.7935123  | -0.4957006 | -0.0719376 |
| C | -2.4050955 | -1.2098573 | 2.1295034  |
| H | -3.0423462 | 0.1570190  | -0.1275510 |
| H | -1.2550312 | 0.9246115  | 1.2666710  |
| H | 0.6441940  | 0.7118936  | -1.9994271 |
| H | 3.0667566  | 0.3217497  | -2.0823510 |
| H | 3.1061356  | -0.4374186 | 2.1580000  |
| H | 0.6609120  | -0.0418227 | 2.2407292  |
| H | 0.4140906  | -2.1387052 | -1.1341260 |
| H | -0.3016575 | -3.7487976 | -1.0645672 |
| H | -2.8769209 | -0.5316921 | -2.2886371 |
| H | -1.1741145 | -0.1491315 | -2.2788330 |
| H | -1.2799152 | -2.4239056 | -2.9718997 |
| H | -2.4994725 | -2.8351884 | -1.7695798 |
| H | -2.9427416 | 4.0589388  | 0.0795112  |
| H | -3.5679160 | 2.5336572  | -0.5975127 |
| H | -2.9178391 | 2.5675311  | 1.0737463  |
| H | -0.3631566 | 4.5251266  | 0.5321040  |
| H | 0.8963195  | 3.2812515  | 0.3103889  |
| H | -0.3391190 | 3.0797177  | 1.5937598  |
| H | -2.9617436 | -2.1038764 | 2.4402200  |
| H | -1.6440719 | -1.0408689 | 2.9060619  |
| H | -3.0991847 | -0.3613976 | 2.1603111  |

2b\_sy\_c\_4.log

E = -1188.219190

H = -1187.853859

G = -1187.924424

NImag=0

|   |            |            |            |
|---|------------|------------|------------|
| C | -5.0664049 | 0.3524385  | -2.7872666 |
| C | -4.0198442 | 0.8655255  | -1.8274500 |
| C | -5.4086261 | -0.9832036 | -2.9270669 |
| O | -6.2493944 | -1.4411265 | -3.7826414 |
| C | -4.6700557 | 1.9228619  | -0.8677890 |
| C | -5.5203169 | 1.3512925  | 0.2362304  |
| C | -5.0075890 | 0.9725330  | 1.4830221  |
| C | -5.8252442 | 0.3663891  | 2.4284242  |
| C | -7.1694122 | 0.1255895  | 2.1199032  |
| C | -7.6977542 | 0.5030733  | 0.8801145  |
| C | -6.8713416 | 1.1215994  | -0.0504428 |
| C | -4.7200951 | -2.0272926 | -2.0451165 |
| C | -3.2492460 | -0.2405197 | -1.0901587 |
| C | -4.1123175 | -1.4605350 | -0.7675531 |
| S | -3.3715244 | 3.0242742  | -0.1425523 |
| C | -2.7869269 | 3.9231487  | -1.5942860 |
| C | -4.3771376 | 4.3049207  | 0.6358393  |
| C | -8.0195423 | -0.5057702 | 3.0937195  |
| N | -8.7039873 | -1.0131513 | 3.8782835  |
| C | -5.6922139 | 1.3777317  | -3.6968956 |

|   |            |            |            |
|---|------------|------------|------------|
| H | -3.2882387 | 1.4484433  | -2.4099770 |
| H | -5.2732270 | 2.6109984  | -1.4708828 |
| H | -3.9604941 | 1.1278968  | 1.7307022  |
| H | -5.4273239 | 0.0736350  | 3.3942836  |
| H | -8.7429130 | 0.3188135  | 0.6548231  |
| H | -7.2750387 | 1.4289112  | -1.0108589 |
| H | -5.4627013 | -2.7989699 | -1.8115412 |
| H | -3.9411572 | -2.5191617 | -2.6470764 |
| H | -2.4302877 | -0.5672110 | -1.7435832 |
| H | -2.7759608 | 0.1510723  | -0.1794956 |
| H | -4.9180013 | -1.1903872 | -0.0758394 |
| H | -3.5010967 | -2.2169346 | -0.2605540 |
| H | -2.2870050 | 4.8190226  | -1.2204342 |
| H | -2.0700187 | 3.2994790  | -2.1272735 |
| H | -3.6373296 | 4.1883980  | -2.2260012 |
| H | -3.7033588 | 5.1205413  | 0.9046827  |
| H | -4.8279545 | 3.8845692  | 1.5354406  |
| H | -5.1398049 | 4.6427465  | -0.0690983 |
| H | -6.0500700 | 0.8951773  | -4.6117862 |
| H | -6.5593034 | 1.9025959  | -3.2591205 |
| H | -4.9721400 | 2.1608856  | -3.9796279 |

2b\_sy\_c\_4\_ts1.log

E = -1188.199021  
H = -1187.836473  
G = -1187.906695

NImag=1

|   |            |            |            |
|---|------------|------------|------------|
| C | -0.6325909 | 2.2872677  | -0.3976377 |
| C | -1.3219549 | 1.4521828  | 0.4963375  |
| C | 0.6865099  | 2.7647517  | -0.1270127 |
| O | 1.3309984  | 3.4722354  | -0.9330981 |
| C | -1.3834591 | -0.4457713 | -0.4031651 |
| C | -0.0271687 | -0.9487520 | -0.3983362 |
| C | 0.4676840  | -1.9265534 | 0.4990281  |
| C | 1.8168421  | -2.2210900 | 0.5649502  |
| C | 2.7266293  | -1.5424382 | -0.2662290 |
| C | 2.2563132  | -0.5935766 | -1.1863097 |
| C | 0.9015061  | -0.3132459 | -1.2592820 |
| C | 1.2823192  | 2.5187810  | 1.2541321  |
| C | -0.7829021 | 1.2211768  | 1.8911594  |
| C | 0.7447153  | 1.2735586  | 1.9528735  |
| S | -2.5747394 | -1.5028542 | 0.3583588  |
| C | -4.0616355 | -0.4859609 | 0.4222146  |
| C | -3.0711857 | -2.6875049 | -0.9206253 |
| C | 4.1255803  | -1.8384221 | -0.1903972 |
| N | 5.2592335  | -2.0784836 | -0.1272403 |
| C | -1.2609005 | 2.6474895  | -1.7162886 |
| H | -2.4077601 | 1.5025790  | 0.4346898  |
| H | -1.7571757 | -0.0974246 | -1.3674311 |
| H | -0.2052193 | -2.4533501 | 1.1696272  |
| H | 2.1787531  | -2.9704936 | 1.2619915  |
| H | 2.9562952  | -0.0845917 | -1.8422402 |
| H | 0.5435600  | 0.4092067  | -1.9853282 |
| H | 2.3714156  | 2.4740226  | 1.1485506  |
| H | 1.0587133  | 3.4128593  | 1.8546928  |
| H | -1.1977160 | 2.0105468  | 2.5354525  |
| H | -1.1499413 | 0.2695534  | 2.2967457  |
| H | 1.1682495  | 0.3856039  | 1.4750029  |
| H | 1.0714859  | 1.2561619  | 2.9984995  |
| H | -4.9000928 | -1.1652189 | 0.5867919  |
| H | -3.9775107 | 0.2011666  | 1.2645030  |

|   |            |            |            |
|---|------------|------------|------------|
| H | -4.1797273 | 0.0514152  | -0.5214014 |
| H | -3.8763727 | -3.3060856 | -0.5183602 |
| H | -2.1986415 | -3.3040550 | -1.1440168 |
| H | -3.3981652 | -2.1385522 | -1.8060141 |
| H | -1.1176794 | 3.7070756  | -1.9547935 |
| H | -0.8263628 | 2.0819191  | -2.5554853 |
| H | -2.3366953 | 2.4388140  | -1.7064129 |

2b\_sy\_c\_5.log

E = -1188.221139  
H = -1187.855618  
G = -1187.925414

NImag=0

|   |            |            |            |
|---|------------|------------|------------|
| C | -3.6237595 | 0.3051451  | -2.6817488 |
| C | -4.3003233 | 0.0199433  | -1.3581821 |
| C | -4.0301923 | -0.2788810 | -3.8732032 |
| O | -3.4599130 | -0.0994194 | -5.0081008 |
| C | -5.3289445 | 1.1076067  | -0.9113271 |
| C | -5.9328023 | 0.9343734  | 0.4584207  |
| C | -5.1482740 | 0.6177129  | 1.5762826  |
| C | -5.7358746 | 0.4400545  | 2.8227386  |
| C | -7.1231862 | 0.5740867  | 2.9548711  |
| C | -7.9219536 | 0.8818286  | 1.8480072  |
| C | -7.3193836 | 1.0605147  | 0.6084824  |
| C | -5.1877903 | -1.2837199 | -3.8824062 |
| C | -5.0448539 | -1.3274235 | -1.3760758 |
| C | -5.9777637 | -1.4203091 | -2.5808582 |
| S | -4.5963734 | 2.7909804  | -1.1448713 |
| C | -5.8837250 | 3.8890406  | -0.5259354 |
| C | -3.3632590 | 2.9613193  | 0.1581564  |
| C | -7.7345199 | 0.3871554  | 4.2440147  |
| N | -8.2261403 | 0.2374931  | 5.2818330  |
| C | -2.3422628 | 1.1060308  | -2.6774254 |
| H | -3.5316693 | -0.0276523 | -0.5716747 |
| H | -6.1311629 | 1.1534977  | -1.6568680 |
| H | -4.0733768 | 0.4979185  | 1.4820869  |
| H | -5.1293318 | 0.1947321  | 3.6882003  |
| H | -8.9967070 | 0.9777657  | 1.9608355  |
| H | -7.9328353 | 1.2961884  | -0.2570006 |
| H | -5.8519730 | -1.0257502 | -4.7160191 |
| H | -4.7386442 | -2.2528311 | -4.1449476 |
| H | -4.2908252 | -2.1218923 | -1.4403428 |
| H | -5.5988522 | -1.4842549 | -0.4431232 |
| H | -6.7442669 | -0.6369565 | -2.5189619 |
| H | -6.5179841 | -2.3739319 | -2.5629809 |
| H | -5.4979718 | 4.9063045  | -0.6210844 |
| H | -6.7610598 | 3.7657468  | -1.1639976 |
| H | -6.1144969 | 3.6601401  | 0.5158288  |
| H | -2.8723567 | 3.9230061  | -0.0048953 |
| H | -2.6381988 | 2.1530470  | 0.0507661  |
| H | -3.8450318 | 2.9365312  | 1.1369827  |
| H | -1.7123953 | 0.7839771  | -3.5144050 |
| H | -2.4592071 | 2.1973044  | -2.7926649 |
| H | -1.7766580 | 0.9511769  | -1.7473067 |

2b\_sy\_c\_5\_r.log

E = -1188.213091  
H = -1187.847494  
G = -1187.917522

NImag=0

|   |            |            |            |
|---|------------|------------|------------|
| C | -0.4506052 | 0.0009408  | -2.2408040 |
| C | -1.3186268 | -0.2284875 | -1.0227283 |
| C | -0.9112882 | 0.5251576  | -3.4397886 |
| O | -0.2202964 | 0.6204705  | -4.5172264 |
| C | -0.6147515 | 0.3952247  | 0.2215899  |
| C | -0.4877196 | 1.8910327  | 0.3552042  |
| C | -1.5919021 | 2.7461937  | 0.4764180  |
| C | -1.4166731 | 4.1200742  | 0.5807985  |
| C | -0.1217588 | 4.6521010  | 0.5621205  |
| C | 0.9928220  | 3.8160413  | 0.4449689  |
| C | 0.7999115  | 2.4427167  | 0.3488009  |
| C | -2.3613054 | 1.0022907  | -3.5365771 |
| C | -2.7949707 | 0.1501780  | -1.2291803 |
| C | -2.9947263 | 1.3223145  | -2.1891557 |
| S | -1.2220372 | -0.4366688 | 1.7846162  |
| C | 0.1760609  | -0.1535779 | 2.8883947  |
| C | -2.4612525 | 0.5931523  | 2.5951036  |
| C | 0.0637497  | 6.0752944  | 0.6685807  |
| N | 0.2130291  | 7.2203595  | 0.7555232  |
| C | 0.9488268  | -0.5583675 | -2.1726588 |
| H | -1.2963226 | -1.3078094 | -0.7852720 |
| H | 0.3993225  | -0.0216646 | 0.2216503  |
| H | -2.6014183 | 2.3497734  | 0.4880018  |
| H | -2.2739453 | 4.7783917  | 0.6740378  |
| H | 1.9926342  | 4.2368907  | 0.4325212  |
| H | 1.6629040  | 1.7881619  | 0.2613492  |
| H | -2.3735300 | 1.8814808  | -4.1909081 |
| H | -2.9432394 | 0.2231208  | -4.0516332 |
| H | -3.2994406 | -0.7229331 | -1.6622380 |
| H | -3.2940800 | 0.3402761  | -0.2705432 |
| H | -2.5369350 | 2.2337784  | -1.7913303 |
| H | -4.0665064 | 1.5262957  | -2.3004124 |
| H | -0.1087557 | -0.5229630 | 3.8753023  |
| H | 1.0224373  | -0.7253936 | 2.5049794  |
| H | 0.4033627  | 0.9140873  | 2.9244397  |
| H | -2.7014624 | 0.0742689  | 3.5261316  |
| H | -3.3513264 | 0.6439086  | 1.9678110  |
| H | -2.0554675 | 1.5834806  | 2.8047563  |
| H | 1.3256438  | -0.7224605 | -3.1867261 |
| H | 1.6777379  | 0.0959374  | -1.6656039 |
| H | 0.9753529  | -1.5197126 | -1.6351712 |

2b\_sy\_c\_5\_ts1.log

E = -1188.191937

H = -1187.829090

G = -1187.900443

NImag=1

|   |            |            |            |
|---|------------|------------|------------|
| C | -2.8424388 | -0.2790982 | -0.6322645 |
| C | -1.4895141 | -0.5016927 | -0.9270171 |
| C | -3.6122797 | -1.2477941 | 0.0889555  |
| O | -4.8120364 | -1.0667336 | 0.3869500  |
| C | -0.2149079 | 0.4983180  | 0.5079882  |
| C | 1.1939753  | 0.2040512  | 0.3120822  |
| C | 1.9647166  | 0.7451466  | -0.7423582 |
| C | 3.2786467  | 0.3527853  | -0.9470715 |
| C | 3.8637980  | -0.6088594 | -0.1101099 |
| C | 3.1131004  | -1.1750414 | 0.9346307  |
| C | 1.8061501  | -0.7705356 | 1.1372018  |
| C | -2.9866327 | -2.5964301 | 0.4299304  |
| C | -0.9158522 | -1.8913434 | -0.7826470 |
| C | -1.4607934 | -2.5913430 | 0.4573981  |

|   |            |            |            |
|---|------------|------------|------------|
| S | -0.7912826 | 2.1577560  | 0.5627833  |
| C | 0.3903069  | 3.1166575  | 1.5466316  |
| C | -0.5404972 | 2.9633888  | -1.0420907 |
| C | 5.2202476  | -1.0162524 | -0.3239375 |
| N | 6.3191039  | -1.3463770 | -0.4965614 |
| C | -3.5414591 | 0.9930937  | -1.0396723 |
| H | -1.0533583 | 0.0815364  | -1.7395907 |
| H | -0.6498549 | 0.0296198  | 1.3893610  |
| H | 1.5292714  | 1.4627313  | -1.4287387 |
| H | 3.8543173  | 0.7800719  | -1.7623531 |
| H | 3.5647706  | -1.9194073 | 1.5830851  |
| H | 1.2323741  | -1.2059515 | 1.9510632  |
| H | -3.4069153 | -2.9293715 | 1.3843017  |
| H | -3.3409634 | -3.3038943 | -0.3341386 |
| H | -1.2107706 | -2.4581768 | -1.6785570 |
| H | 0.1773275  | -1.8646455 | -0.7782908 |
| H | -1.1103467 | -2.0669490 | 1.3550776  |
| H | -1.0773373 | -3.6154897 | 0.5179748  |
| H | 0.0859893  | 4.1651595  | 1.5049729  |
| H | 0.3339226  | 2.7478343  | 2.5719458  |
| H | 1.3957041  | 2.9882165  | 1.1405961  |
| H | -1.2399500 | 3.8012000  | -1.0781838 |
| H | -0.7694034 | 2.2572831  | -1.8394988 |
| H | 0.4847807  | 3.3260070  | -1.1242267 |
| H | -4.5095222 | 0.7736509  | -1.5047020 |
| H | -3.7545357 | 1.6561636  | -0.1894389 |
| H | -2.9451390 | 1.5584314  | -1.7634327 |

2b\_sy\_c\_5\_ts2.log

E = -1188.200729

H = -1187.836733

G = -1187.907087

NImag=1

|   |            |            |            |
|---|------------|------------|------------|
| C | -2.5234070 | -0.3679316 | 0.6874543  |
| C | -1.9852320 | 0.6857744  | -0.2554366 |
| C | -2.8043986 | -1.6884239 | 0.2890433  |
| O | -3.2896278 | -2.5522495 | 1.0745717  |
| C | -0.6772110 | 0.8297433  | 0.4627856  |
| C | 0.5592309  | 0.0223603  | 0.2991003  |
| C | 1.1941986  | -0.1668376 | -0.9384479 |
| C | 2.4007842  | -0.8488374 | -1.0188554 |
| C | 2.9884965  | -1.3497110 | 0.1496004  |
| C | 2.3787490  | -1.1606443 | 1.3955111  |
| C | 1.1786079  | -0.4655737 | 1.4606310  |
| C | -2.6506394 | -2.0871061 | -1.1744975 |
| C | -1.9871797 | 0.2823060  | -1.7311274 |
| C | -1.7044415 | -1.2023467 | -1.9765747 |
| S | 0.0486639  | 2.9595667  | 0.0708886  |
| C | 1.5223577  | 2.9770949  | 1.1130246  |
| C | 0.8272422  | 3.0741128  | -1.5542916 |
| C | 4.2386563  | -2.0565374 | 0.0686766  |
| N | 5.2454832  | -2.6253500 | 0.0036920  |
| C | -2.9670940 | 0.0556885  | 2.0665748  |
| H | -2.5344034 | 1.6330617  | -0.1463418 |
| H | -0.8252477 | 1.1140014  | 1.5042342  |
| H | 0.7527905  | 0.2268999  | -1.8473448 |
| H | 2.8896493  | -0.9908083 | -1.9769145 |
| H | 2.8448847  | -1.5473717 | 2.2955153  |
| H | 0.7059182  | -0.3011555 | 2.4250996  |
| H | -2.3282527 | -3.1333989 | -1.2096469 |
| H | -3.6602648 | -2.0577656 | -1.6098605 |

|   |            |            |            |
|---|------------|------------|------------|
| H | -2.9904310 | 0.5036973  | -2.1163888 |
| H | -1.2917296 | 0.9138573  | -2.2976811 |
| H | -0.6774766 | -1.4569306 | -1.7049430 |
| H | -1.8035848 | -1.4135279 | -3.0474902 |
| H | 1.9955249  | 3.9589722  | 1.0437999  |
| H | 1.2088894  | 2.7958096  | 2.1434132  |
| H | 2.2189943  | 2.1994334  | 0.7880513  |
| H | 1.2347229  | 4.0814195  | -1.6694720 |
| H | 0.0632121  | 2.9010835  | -2.3142342 |
| H | 1.6293223  | 2.3383862  | -1.6433884 |
| H | -3.9928404 | -0.2831101 | 2.2601170  |
| H | -2.3516073 | -0.3584240 | 2.8779571  |
| H | -2.9501007 | 1.1475040  | 2.1692564  |

2b\_sy\_c\_6.log

E = -1188.218403

H = -1187.852994

G = -1187.924305

NImag=0

|   |            |            |            |
|---|------------|------------|------------|
| C | -5.3162285 | 0.2361304  | -2.6372278 |
| C | -4.1951746 | 0.8740521  | -1.8435041 |
| C | -5.3959958 | -1.1247785 | -2.8915534 |
| O | -6.3246749 | -1.6943751 | -3.5705796 |
| C | -4.7953399 | 1.8912219  | -0.8227561 |
| C | -5.6496231 | 1.3202962  | 0.2886172  |
| C | -5.1053605 | 0.7105270  | 1.4272431  |
| C | -5.9305673 | 0.1829462  | 2.4135404  |
| C | -7.3189800 | 0.2631861  | 2.2629412  |
| C | -7.8795953 | 0.8819264  | 1.1403749  |
| C | -7.0410590 | 1.4131246  | 0.1681760  |
| C | -4.2787975 | -2.0431009 | -2.3834567 |
| C | -3.2542947 | -0.1329249 | -1.1761315 |
| C | -2.9725824 | -1.3043447 | -2.1093518 |
| S | -3.4546721 | 2.8999521  | -0.0353067 |
| C | -2.6963262 | 3.7215773  | -1.4496569 |
| C | -4.4126838 | 4.2585158  | 0.6641099  |
| C | -8.1783756 | -0.2845206 | 3.2788564  |
| N | -8.8699759 | -0.7250329 | 4.0966363  |
| C | -6.2422832 | 1.1765876  | -3.3662475 |
| H | -3.5967782 | 1.4989969  | -2.5310015 |
| H | -5.3818803 | 2.6335131  | -1.3760226 |
| H | -4.0303365 | 0.6425530  | 1.5648871  |
| H | -5.5038634 | -0.2871117 | 3.2931184  |
| H | -8.9573603 | 0.9511252  | 1.0370184  |
| H | -7.4745096 | 1.9115836  | -0.6931573 |
| H | -4.6130851 | -2.5590526 | -1.4711614 |
| H | -4.1409826 | -2.8181919 | -3.1459987 |
| H | -2.3218375 | 0.3613299  | -0.8707249 |
| H | -3.7175173 | -0.5397604 | -0.2700146 |
| H | -2.2285862 | -1.9735728 | -1.6621588 |
| H | -2.5494148 | -0.9337433 | -3.0531111 |
| H | -2.1346295 | 4.5691572  | -1.0515133 |
| H | -2.0123977 | 3.0208616  | -1.9288513 |
| H | -3.4736319 | 4.0579609  | -2.1391459 |
| H | -3.7012609 | 4.9971162  | 1.0379342  |
| H | -5.0028139 | 3.8600436  | 1.4909506  |
| H | -5.0538311 | 4.6858563  | -0.1097223 |
| H | -6.6925435 | 0.6543487  | -4.2166188 |
| H | -7.0757493 | 1.5787403  | -2.7689753 |
| H | -5.6958002 | 2.0528802  | -3.7510543 |

2b\_sy\_c\_6\_ts1.log

E = -1188.199549  
H = -1187.836904  
G = -1187.906976

NImag=1

|   |            |            |            |
|---|------------|------------|------------|
| C | -0.4000855 | -2.1956087 | 0.5689600  |
| C | -1.2799632 | -1.4765787 | -0.2618940 |
| C | 0.9592676  | -2.4234452 | 0.1935587  |
| O | 1.7929766  | -2.9929653 | 0.9324426  |
| C | -1.4081230 | 0.4520310  | 0.5056537  |
| C | -0.0611703 | 0.9710330  | 0.4043255  |
| C | 0.4116538  | 1.7799203  | -0.6577414 |
| C | 1.7561402  | 2.0785581  | -0.7897667 |
| C | 2.6822908  | 1.5687797  | 0.1367852  |
| C | 2.2374042  | 0.7795580  | 1.2068460  |
| C | 0.8886057  | 0.4903765  | 1.3367649  |
| C | 1.3793554  | -2.0033765 | -1.2110521 |
| C | -0.9477583 | -1.2509280 | -1.7312423 |
| C | 0.2205320  | -2.1208654 | -2.1991983 |
| S | -2.6422807 | 1.3871551  | -0.3384163 |
| C | -4.0786402 | 0.2984350  | -0.3423280 |
| C | -3.2119155 | 2.6362320  | 0.8442940  |
| C | 4.0762273  | 1.8686699  | -0.0039646 |
| N | 5.2048948  | 2.1116536  | -0.1193353 |
| C | -0.8515737 | -2.6386743 | 1.9343695  |
| H | -2.3345915 | -1.6403707 | -0.0462444 |
| H | -1.7469557 | 0.1954283  | 1.5106410  |
| H | -0.2776779 | 2.1822604  | -1.3946535 |
| H | 2.0996385  | 2.7007727  | -1.6102337 |
| H | 2.9517351  | 0.3938715  | 1.9278476  |
| H | 0.5510972  | -0.1110009 | 2.1745126  |
| H | 1.7358046  | -0.9619961 | -1.1752549 |
| H | 2.2288586  | -2.6275506 | -1.5057662 |
| H | -1.8417040 | -1.4423477 | -2.3362090 |
| H | -0.6689614 | -0.2044950 | -1.9097745 |
| H | 0.5322852  | -1.8139110 | -3.2035898 |
| H | -0.0943602 | -3.1697313 | -2.2619257 |
| H | -4.9412999 | 0.9163865  | -0.5983658 |
| H | -3.9315634 | -0.4626552 | -1.1092875 |
| H | -4.2034337 | -0.1499106 | 0.6456762  |
| H | -4.0531224 | 3.1697116  | 0.3963783  |
| H | -2.3794333 | 3.3208524  | 1.0153697  |
| H | -3.5066064 | 2.1400270  | 1.7712273  |
| H | -0.5229132 | -3.6605446 | 2.1547562  |
| H | -0.4477462 | -2.0068876 | 2.7406470  |
| H | -1.9441540 | -2.6067601 | 2.0136090  |

2b\_sy\_c\_8.log

E = -1188.218087  
H = -1187.852563  
G = -1187.921414

NImag=0

|   |            |            |            |
|---|------------|------------|------------|
| C | -3.7688688 | -0.2285509 | -1.9878883 |
| C | -5.2079356 | -0.5644461 | -1.6591759 |
| C | -3.3885825 | 0.1766280  | -3.2590651 |
| O | -2.2014115 | 0.5286589  | -3.5912851 |
| C | -6.0579806 | 0.6262074  | -1.0834736 |
| C | -6.2673874 | 0.6752774  | 0.4072449  |
| C | -5.2462597 | 0.3478709  | 1.3089553  |
| C | -5.4715718 | 0.3867094  | 2.6794754  |



|   |            |            |            |
|---|------------|------------|------------|
| C | -6.7359543 | 0.7501929  | 3.1576708  |
| C | -7.7709899 | 1.0713266  | 2.2726731  |
| C | -7.5282107 | 1.0315043  | 0.9050605  |
| C | -4.4031427 | 0.1562027  | -4.4116453 |
| C | -5.9394941 | -1.1426686 | -2.8808606 |
| C | -5.8581236 | -0.1849087 | -4.0667035 |
| S | -5.3708204 | 2.2223687  | -1.7607801 |
| C | -6.6211641 | 3.4041022  | -1.2059321 |
| C | -3.9828598 | 2.7422709  | -0.7402231 |
| C | -6.9757993 | 0.7863415  | 4.5761658  |
| N | -7.1691709 | 0.8165610  | 5.7175676  |
| C | -2.7070786 | -0.4266894 | -0.9367103 |
| H | -5.2242776 | -1.3228957 | -0.8642866 |
| H | -7.0488242 | 0.6388911  | -1.5557831 |
| H | -4.2689318 | 0.0543227  | 0.9421303  |
| H | -4.6789363 | 0.1332363  | 3.3755402  |
| H | -8.7498525 | 1.3430012  | 2.6532969  |
| H | -8.3310151 | 1.2735027  | 0.2138661  |
| H | -4.3466643 | 1.1238387  | -4.9260855 |
| H | -4.0105479 | -0.5833037 | -5.1238033 |
| H | -5.4612485 | -2.0943911 | -3.1423017 |
| H | -6.9865664 | -1.3585781 | -2.6338832 |
| H | -6.4199609 | 0.7296294  | -3.8335721 |
| H | -6.3596246 | -0.6220713 | -4.9376112 |
| H | -6.3309571 | 4.3767463  | -1.6076572 |
| H | -7.5818488 | 3.1042320  | -1.6288675 |
| H | -6.6643284 | 3.4388572  | -0.1158364 |
| H | -3.9003373 | 3.8226208  | -0.8814623 |
| H | -3.0936068 | 2.2403626  | -1.1178014 |
| H | -4.1669805 | 2.5158710  | 0.3119551  |
| H | -2.5747310 | 0.4082418  | -0.2271939 |
| H | -2.9144265 | -1.3162609 | -0.3242928 |
| H | -1.7367277 | -0.5649120 | -1.4253208 |

2b\_sy\_c\_8\_ts1.log

E = -1188.191256

H = -1187.828299

G = -1187.898462

NImag=1

|   |            |            |            |
|---|------------|------------|------------|
| C | 1.5338367  | -1.5013308 | 0.1944000  |
| C | 1.2225561  | -0.8969922 | -1.0410180 |
| C | 2.8619125  | -1.5164404 | 0.7045790  |
| O | 3.1540983  | -1.9995351 | 1.8237954  |
| C | 0.1746505  | 0.8948853  | -0.8898394 |
| C | -1.1980320 | 0.5343601  | -0.5440656 |
| C | -1.7280230 | 0.5028802  | 0.7626225  |
| C | -3.0138205 | 0.0479508  | 1.0076368  |
| C | -3.8123266 | -0.4058464 | -0.0527216 |
| C | -3.3056730 | -0.3949932 | -1.3609604 |
| C | -2.0235205 | 0.0727531  | -1.5947783 |
| C | 4.0059064  | -0.9982381 | -0.1632585 |
| C | 2.3494184  | -0.5587083 | -1.9948971 |
| C | 3.5763436  | -0.0294252 | -1.2612854 |
| S | 1.0402876  | 2.1306290  | 0.0182942  |
| C | -0.1290794 | 3.3741926  | 0.6360169  |
| C | 1.6400361  | 1.4403508  | 1.5887308  |
| C | -5.1410212 | -0.8799385 | 0.1994727  |
| N | -6.2166801 | -1.2635909 | 0.4025917  |
| C | 0.4515996  | -2.1002648 | 1.0547299  |
| H | 0.3261893  | -1.2725231 | -1.5390212 |
| H | 0.2867435  | 1.1806286  | -1.9344435 |

|   |            |            |            |
|---|------------|------------|------------|
| H | -1.1318593 | 0.8140099  | 1.6131051  |
| H | -3.4019575 | 0.0329593  | 2.0211777  |
| H | -3.9208237 | -0.7451946 | -2.1839715 |
| H | -1.6413075 | 0.0891465  | -2.6120500 |
| H | 4.7505568  | -0.5455808 | 0.5003624  |
| H | 4.4825597  | -1.8811874 | -0.6134311 |
| H | 2.6164251  | -1.4883432 | -2.5189123 |
| H | 2.0145088  | 0.1470682  | -2.7611602 |
| H | 3.3471517  | 0.9505650  | -0.8235299 |
| H | 4.3980451  | 0.1365910  | -1.9660269 |
| H | 0.4735794  | 4.1907013  | 1.0394400  |
| H | -0.7062153 | 3.7248141  | -0.2211958 |
| H | -0.7821143 | 2.9660567  | 1.4060911  |
| H | 1.7396043  | 2.2942891  | 2.2625388  |
| H | 2.6198165  | 0.9961993  | 1.4168682  |
| H | 0.9507171  | 0.7027701  | 1.9972697  |
| H | 0.2317339  | -1.4914898 | 1.9444769  |
| H | -0.4833235 | -2.2077864 | 0.4928737  |
| H | 0.7459825  | -3.0883102 | 1.4285086  |

2b\_sy\_c\_9.log

E = -1188.216787  
H = -1187.851429  
G = -1187.921593

NImag=0

|   |            |            |            |
|---|------------|------------|------------|
| C | -3.8637413 | 0.4148310  | -2.8339298 |
| C | -4.4578217 | 0.1300843  | -1.4699595 |
| C | -4.1658277 | -0.3182329 | -3.9741921 |
| O | -3.6553067 | -0.0980959 | -5.1294544 |
| C | -5.3421301 | 1.2795870  | -0.8901924 |
| C | -5.9261756 | 1.0303134  | 0.4784443  |
| C | -5.1445742 | 0.5368233  | 1.5325073  |
| C | -5.7098904 | 0.2985802  | 2.7789308  |
| C | -7.0730223 | 0.5513678  | 2.9753876  |
| C | -7.8690198 | 1.0362587  | 1.9321220  |
| C | -7.2884700 | 1.2721934  | 0.6914595  |
| C | -5.0972901 | -1.5265743 | -3.8581074 |
| C | -5.3898358 | -1.1086486 | -1.4331732 |
| C | -5.0196931 | -2.1559697 | -2.4724843 |
| S | -4.4762118 | 2.9193250  | -0.9596410 |
| C | -5.6993496 | 4.0529661  | -0.2777526 |
| C | -3.2673884 | 2.8942928  | 0.3779238  |
| C | -7.6627841 | 0.3040599  | 4.2643642  |
| N | -8.1371552 | 0.1057580  | 5.3020637  |
| C | -2.6773097 | 1.3515415  | -2.9272803 |
| H | -3.6382143 | -0.0322516 | -0.7483391 |
| H | -6.1529898 | 1.4619708  | -1.6067013 |
| H | -4.0895689 | 0.3260073  | 1.3852771  |
| H | -5.1051715 | -0.0846042 | 3.5941125  |
| H | -8.9256131 | 1.2224242  | 2.0932497  |
| H | -7.9016032 | 1.6448838  | -0.1245174 |
| H | -6.1363173 | -1.2383700 | -4.0761561 |
| H | -4.7942339 | -2.2335213 | -4.6381014 |
| H | -5.3903520 | -1.5350554 | -0.4246076 |
| H | -6.4225345 | -0.7895061 | -1.6376456 |
| H | -5.6957852 | -3.0147846 | -2.3853688 |
| H | -4.0011721 | -2.5251041 | -2.2922752 |
| H | -5.2380841 | 5.0427591  | -0.2776323 |
| H | -6.5643707 | 4.0487935  | -0.9436651 |
| H | -5.9751898 | 3.7567213  | 0.7354935  |
| H | -2.6838522 | 3.8123511  | 0.2813071  |

|   |            |           |            |
|---|------------|-----------|------------|
| H | -2.6189675 | 2.0276656 | 0.2399471  |
| H | -3.7758904 | 2.8601095 | 1.3425199  |
| H | -1.9345059 | 0.9339595 | -3.6192964 |
| H | -2.8985573 | 2.3623665 | -3.3014806 |
| H | -2.1841288 | 1.4771242 | -1.9522560 |

2b\_sy\_c\_9\_ts1.log

E = -1188.188341

H = -1187.825521

G = -1187.897608

NImag=1

|   |            |            |            |
|---|------------|------------|------------|
| C | -2.7646317 | -0.2716715 | -0.7494535 |
| C | -1.4152775 | -0.6372232 | -0.8966762 |
| C | -3.5858573 | -0.9509452 | 0.2068640  |
| O | -4.7465493 | -0.5921046 | 0.4959389  |
| C | -0.1888127 | 0.3904075  | 0.5188550  |
| C | 1.2314821  | 0.1494072  | 0.3218936  |
| C | 1.9830228  | 0.7296487  | -0.7267240 |
| C | 3.3117101  | 0.3933255  | -0.9319176 |
| C | 3.9341420  | -0.5515567 | -0.1022761 |
| C | 3.2062394  | -1.1557160 | 0.9358557  |
| C | 1.8831678  | -0.8047241 | 1.1401566  |
| C | -2.9903675 | -2.1793940 | 0.8794126  |
| C | -0.9660214 | -2.0627112 | -0.5880090 |
| C | -2.1143209 | -2.9502870 | -0.1044707 |
| S | -0.8286096 | 2.0262993  | 0.5798614  |
| C | 0.2952177  | 3.0223665  | 1.5918187  |
| C | -0.5745830 | 2.8364991  | -1.0210620 |
| C | 5.3062272  | -0.9023185 | -0.3182179 |
| N | 6.4174797  | -1.1863358 | -0.4929625 |
| C | -3.3480229 | 0.9317656  | -1.4442117 |
| H | -0.8822015 | -0.1727201 | -1.7275422 |
| H | -0.6094034 | -0.1071619 | 1.3931549  |
| H | 1.5219773  | 1.4351899  | -1.4082162 |
| H | 3.8706588  | 0.8505743  | -1.7424772 |
| H | 3.6864611  | -1.8853766 | 1.5804455  |
| H | 1.3306028  | -1.2637505 | 1.9555915  |
| H | -2.3864195 | -1.8568773 | 1.7410715  |
| H | -3.8130126 | -2.7891449 | 1.2647398  |
| H | -0.5200009 | -2.4827130 | -1.4970798 |
| H | -0.1728129 | -2.0716617 | 0.1663012  |
| H | -1.7130540 | -3.8594250 | 0.3555934  |
| H | -2.7311135 | -3.2628888 | -0.9558374 |
| H | -0.0459007 | 4.0592698  | 1.5443517  |
| H | 0.2284773  | 2.6500235  | 2.6152104  |
| H | 1.3137095  | 2.9310516  | 1.2090974  |
| H | -1.3177726 | 3.6337023  | -1.0879385 |
| H | -0.7380784 | 2.1086785  | -1.8151745 |
| H | 0.4315957  | 3.2540051  | -1.0744689 |
| H | -4.3711344 | 0.7216417  | -1.7745656 |
| H | -3.4166345 | 1.8203013  | -0.7976764 |
| H | -2.7603736 | 1.2051693  | -2.3266829 |

2b\_sy\_c\_prod\_1.log

E = -710.334261

H = -710.052948

G = -710.111105

NImag=0

|   |            |            |           |
|---|------------|------------|-----------|
| C | -0.6981484 | 0.7235338  | 3.0334934 |
| C | -1.8933110 | -0.1177628 | 2.6222166 |

|   |            |            |            |
|---|------------|------------|------------|
| C | -1.4358362 | 1.0036597  | 1.7309932  |
| C | -0.8801158 | 0.8013586  | 0.3580057  |
| C | 0.4333173  | 1.1578356  | 0.0325011  |
| C | 0.9228639  | 0.9701550  | -1.2555934 |
| C | 0.0835296  | 0.4277821  | -2.2355162 |
| C | -1.2422231 | 0.0876100  | -1.9327931 |
| C | -1.7134863 | 0.2794429  | -0.6411325 |
| H | -2.0451422 | 1.9045386  | 1.7994098  |
| C | -0.8528084 | 1.7573570  | 4.1294152  |
| H | -2.7989237 | 0.0919437  | 3.1868922  |
| C | -1.7194560 | -1.5783547 | 2.2489307  |
| C | -0.3276219 | -1.9399050 | 1.7209506  |
| C | 0.7759914  | -1.3838627 | 2.6166719  |
| C | 0.6580045  | 0.0779651  | 2.9912101  |
| O | 1.6412405  | 0.6977951  | 3.3672433  |
| C | 0.5838954  | 0.2243708  | -3.5682679 |
| N | 0.9868202  | 0.0602115  | -4.6420046 |
| H | 1.0827066  | 1.5839022  | 0.7915960  |
| H | 1.9438746  | 1.2413561  | -1.5038693 |
| H | -1.8857890 | -0.3252442 | -2.7029451 |
| H | -2.7370863 | 0.0093609  | -0.3964817 |
| H | -1.8775482 | 2.1397198  | 4.1381289  |
| H | -0.6402069 | 1.3204006  | 5.1106232  |
| H | -0.1704328 | 2.5976381  | 3.9747905  |
| H | -1.9172613 | -2.1734159 | 3.1491636  |
| H | -2.4804626 | -1.8601695 | 1.5113048  |
| H | -0.1921675 | -1.5806758 | 0.6976045  |
| H | -0.2347006 | -3.0295562 | 1.6800074  |
| H | 1.7719739  | -1.5499200 | 2.1964067  |
| H | 0.7479105  | -1.9048702 | 3.5865444  |

2b\_sy\_c\_prod\_2.log

E = -710.334347  
H = -710.052942  
G = -710.110835

NImag=0

|   |            |            |            |
|---|------------|------------|------------|
| C | -0.6492659 | 0.7058635  | 2.9491919  |
| C | -1.8759323 | -0.1212810 | 2.5734209  |
| C | -1.4261620 | 0.9944739  | 1.6718854  |
| C | -0.8830992 | 0.8008121  | 0.2917863  |
| C | 0.3850121  | 1.2831821  | -0.0558904 |
| C | 0.8681222  | 1.1521654  | -1.3520130 |
| C | 0.0687135  | 0.5313401  | -2.3199426 |
| C | -1.2075705 | 0.0554954  | -1.9952022 |
| C | -1.6741278 | 0.1963499  | -0.6934771 |
| H | -2.0169045 | 1.9062433  | 1.7557933  |
| C | -0.7534097 | 1.7301469  | 4.0570026  |
| H | -2.7510504 | 0.1173446  | 3.1718431  |
| C | -1.7333836 | -1.5924615 | 2.1929653  |
| C | -0.4158650 | -2.1992860 | 2.6719499  |
| C | 0.7605063  | -1.3365596 | 2.2049167  |
| C | 0.6869415  | 0.0330883  | 2.8447799  |
| O | 1.6768614  | 0.5552078  | 3.3356715  |
| C | 0.5607994  | 0.3858785  | -3.6633661 |
| N | 0.9569173  | 0.2683535  | -4.7456466 |
| H | 1.0015270  | 1.7671571  | 0.6968793  |
| H | 1.8523026  | 1.5244310  | -1.6171570 |
| H | -1.8203942 | -0.4175963 | -2.7555843 |
| H | -2.6659914 | -0.1655211 | -0.4378984 |
| H | -1.7715576 | 2.1268914  | 4.1025647  |
| H | -0.5136635 | 1.2825872  | 5.0269005  |

|   |            |            |           |
|---|------------|------------|-----------|
| H | -0.0647016 | 2.5628168  | 3.8870925 |
| H | -2.5745424 | -2.1419027 | 2.6249045 |
| H | -1.8011653 | -1.7161277 | 1.1059670 |
| H | -0.3049326 | -3.2181325 | 2.2883722 |
| H | -0.4088469 | -2.2602342 | 3.7674605 |
| H | 0.7252113  | -1.2320205 | 1.1120859 |
| H | 1.7280516  | -1.7705053 | 2.4695441 |

2b\_sy\_tr\_1.log

E = -1188.219901  
H = -1187.854516  
G = -1187.924348

NImag=0

|   |            |            |            |
|---|------------|------------|------------|
| C | -1.6405163 | 0.0119388  | 1.3563683  |
| C | -2.0932261 | 0.3528902  | -0.0405779 |
| C | -2.3973603 | -0.7239280 | 2.2516794  |
| O | -1.9626647 | -1.1940645 | 3.3641970  |
| C | -1.1188401 | -0.2721771 | -1.0879586 |
| C | -1.3678258 | 0.1713308  | -2.5105124 |
| C | -2.4040310 | -0.3379363 | -3.3047891 |
| C | -2.6269560 | 0.1618450  | -4.5813539 |
| C | -1.8130454 | 1.1915423  | -5.0688756 |
| C | -0.7757673 | 1.7124092  | -4.2883038 |
| C | -0.5569495 | 1.1931227  | -3.0177085 |
| C | -3.8739039 | -0.9646605 | 1.9294344  |
| C | -3.5614655 | -0.0063763 | -0.3403779 |
| C | -4.4196453 | 0.0396745  | 0.9189462  |
| S | -1.1810127 | -2.1284144 | -0.9517241 |
| C | -0.1657548 | -2.6374785 | -2.3589775 |
| C | -0.0276727 | -2.5515300 | 0.3742396  |
| C | -2.0428559 | 1.7152388  | -6.3890342 |
| N | -2.2277117 | 2.1369690  | -7.4516929 |
| C | -0.2653467 | 0.4816839  | 1.7510979  |
| H | -1.9551222 | 1.4349188  | -0.2227074 |
| H | -0.0869234 | -0.0245070 | -0.8167666 |
| H | -3.0470260 | -1.1350913 | -2.9415615 |
| H | -3.4255141 | -0.2381332 | -5.1971791 |
| H | -0.1475662 | 2.5074449  | -4.6758789 |
| H | 0.2515573  | 1.5884438  | -2.4092376 |
| H | -4.0110278 | -1.9884401 | 1.5485466  |
| H | -4.4182050 | -0.9107126 | 2.8795383  |
| H | -3.9563655 | 0.6581266  | -1.1161515 |
| H | -3.6351878 | -1.0279949 | -0.7363677 |
| H | -5.4626240 | -0.1827878 | 0.6653043  |
| H | -4.3988461 | 1.0484048  | 1.3520854  |
| H | 0.0636974  | -3.6942000 | -2.2077473 |
| H | -0.7407365 | -2.5125925 | -3.2758598 |
| H | 0.7498213  | -2.0424119 | -2.3820975 |
| H | 0.1025388  | -3.6343931 | 0.3139942  |
| H | -0.4821324 | -2.2672652 | 1.3243472  |
| H | 0.9221668  | -2.0420074 | 0.2041499  |
| H | -0.1975540 | 0.5530135  | 2.8416269  |
| H | 0.5680788  | -0.1664515 | 1.4331886  |
| H | -0.0538779 | 1.4752564  | 1.3275971  |

2b\_sy\_tr\_1\_r.log

E = -1188.215150  
H = -1187.849671  
G = -1187.919531

NImag=0

|   |            |            |            |
|---|------------|------------|------------|
| C | 0.9890214  | -1.7610648 | -0.7455756 |
| C | 1.0536581  | -0.8915309 | 0.4990606  |
| C | 0.6499246  | -3.1108686 | -0.7204950 |
| O | 0.5719298  | -3.8619515 | -1.7568738 |
| C | 0.1439878  | 0.3588031  | 0.3337930  |
| C | 0.5258842  | 1.3225349  | -0.7613329 |
| C | 1.8136701  | 1.8687837  | -0.8281215 |
| C | 2.1456823  | 2.7647431  | -1.8353496 |
| C | 1.1792633  | 3.1164610  | -2.7866052 |
| C | -0.1139818 | 2.5858992  | -2.7260580 |
| C | -0.4334381 | 1.6969568  | -1.7063177 |
| C | 0.4202731  | -3.8090886 | 0.6218691  |
| C | 0.6345099  | -1.6390823 | 1.7759238  |
| C | 1.1031262  | -3.0857227 | 1.7742947  |
| S | 0.1431205  | 1.3923210  | 1.9265315  |
| C | -0.6309513 | 2.9432980  | 1.4124696  |
| C | -1.2304920 | 0.7367519  | 2.9080688  |
| C | 1.5193990  | 4.0407302  | -3.8358767 |
| N | 1.7923001  | 4.7851354  | -4.6799830 |
| C | 1.5425270  | -1.2160901 | -2.0430568 |
| H | 2.0821536  | -0.5111532 | 0.6398959  |
| H | -0.9011003 | 0.0481907  | 0.2205063  |
| H | 2.5699049  | 1.5918708  | -0.0982583 |
| H | 3.1430058  | 3.1880112  | -1.8923003 |
| H | -0.8545952 | 2.8688161  | -3.4666905 |
| H | -1.4348060 | 1.2795796  | -1.6497345 |
| H | -0.6578460 | -3.8943052 | 0.8226935  |
| H | 0.7993357  | -4.8308283 | 0.5087154  |
| H | 1.0180891  | -1.1144648 | 2.6608818  |
| H | -0.4626315 | -1.6489683 | 1.8451004  |
| H | 0.8695293  | -3.5573304 | 2.7356853  |
| H | 2.1934277  | -3.1255465 | 1.6479252  |
| H | -0.8166060 | 3.5062000  | 2.3294903  |
| H | 0.0647231  | 3.4911498  | 0.7775451  |
| H | -1.5663165 | 2.7325466  | 0.8895961  |
| H | -1.5208165 | 1.5346586  | 3.5943822  |
| H | -0.8860213 | -0.1271068 | 3.4718886  |
| H | -2.0592777 | 0.4776571  | 2.2465543  |
| H | 1.8352396  | -2.0604935 | -2.6757882 |
| H | 0.8504738  | -0.6016915 | -2.6387762 |
| H | 2.4299850  | -0.5904046 | -1.8685445 |

2b\_sy\_tr\_1\_ts1.log

E = -1188.194723

H = -1187.832357

G = -1187.903549

NImag=1

|   |            |            |            |
|---|------------|------------|------------|
| C | 2.3883200  | -0.9649561 | 0.9024865  |
| C | 1.0271415  | -1.0654945 | 0.5773397  |
| C | 3.3997188  | -1.0942555 | -0.0986651 |
| O | 4.6021709  | -0.8192480 | 0.1073482  |
| C | 0.0822968  | 0.8482032  | 0.5933460  |
| C | -1.3090369 | 0.5273081  | 0.3856100  |
| C | -1.9632187 | 0.5592537  | -0.8708975 |
| C | -3.2657596 | 0.1130871  | -1.0142614 |
| C | -3.9684170 | -0.3818979 | 0.0961910  |
| C | -3.3435004 | -0.4178201 | 1.3550039  |
| C | -2.0432861 | 0.0304721  | 1.4928375  |
| C | 2.9853496  | -1.6072691 | -1.4719801 |
| C | 0.5980336  | -1.6377783 | -0.7664599 |
| C | 1.7178188  | -2.4538482 | -1.4107285 |

|   |            |            |            |
|---|------------|------------|------------|
| S | 0.8574098  | 1.8297894  | -0.6472793 |
| C | 0.0601490  | 3.4583369  | -0.5947971 |
| C | 2.4337192  | 2.2576851  | 0.1169503  |
| C | -5.3164041 | -0.8382599 | -0.0508053 |
| N | -6.4096425 | -1.2098047 | -0.1695880 |
| C | 2.7981722  | -0.5369528 | 2.2846999  |
| H | 0.3539042  | -1.2751525 | 1.4098844  |
| H | 0.3558512  | 1.1920444  | 1.5908677  |
| H | -1.4523887 | 0.9368880  | -1.7533520 |
| H | -3.7482706 | 0.1478939  | -1.9860875 |
| H | -3.8866803 | -0.7935964 | 2.2167261  |
| H | -1.5699443 | 0.0072156  | 2.4707739  |
| H | 2.8180199  | -0.7379396 | -2.1267432 |
| H | 3.8324873  | -2.1611263 | -1.8889634 |
| H | -0.3067250 | -2.2403993 | -0.6353248 |
| H | 0.3294061  | -0.8337496 | -1.4641982 |
| H | 1.4161611  | -2.7743320 | -2.4136456 |
| H | 1.9101179  | -3.3583927 | -0.8210829 |
| H | 0.6038112  | 4.1175758  | -1.2755965 |
| H | -0.9689844 | 3.3359881  | -0.9367131 |
| H | 0.0886039  | 3.8338565  | 0.4297023  |
| H | 2.8817403  | 3.0318724  | -0.5089417 |
| H | 3.0703187  | 1.3731255  | 0.1305658  |
| H | 2.2481054  | 2.6333863  | 1.1249978  |
| H | 3.6826498  | -1.0833227 | 2.6289522  |
| H | 3.0561267  | 0.5322974  | 2.3339154  |
| H | 1.9866287  | -0.7085335 | 3.0006438  |

2b\_sy\_tr\_2.log

E = -1188.217872

H = -1187.852571

G = -1187.923122

NImag=0

|   |            |            |            |
|---|------------|------------|------------|
| C | -1.5588219 | 0.1978423  | 1.3416261  |
| C | -2.0879536 | 0.4026713  | -0.0540521 |
| C | -2.2661100 | -0.4182614 | 2.3576216  |
| O | -1.8114068 | -0.6350487 | 3.5396821  |
| C | -1.2191424 | -0.3334642 | -1.1347940 |
| C | -1.4421607 | 0.1744947  | -2.5415191 |
| C | -2.4784016 | -0.2777786 | -3.3684605 |
| C | -2.6651927 | 0.2707246  | -4.6317462 |
| C | -1.8126193 | 1.2895131  | -5.0718455 |
| C | -0.7739142 | 1.7538367  | -4.2569006 |
| C | -0.5930198 | 1.1886479  | -3.0009036 |
| C | -3.7070814 | -0.8721871 | 2.1077277  |
| C | -3.5991835 | 0.1691480  | -0.1729007 |
| C | -4.0751715 | -1.0362488 | 0.6365963  |
| S | -1.4006400 | -2.1744193 | -1.1409842 |
| C | -0.1216241 | -2.6314164 | -2.3318169 |
| C | -0.5859864 | -2.7106734 | 0.3798616  |
| C | -2.0020615 | 1.8617731  | -6.3781379 |
| N | -2.1539233 | 2.3226757  | -7.4297156 |
| C | -0.1518101 | 0.6672215  | 1.6034920  |
| H | -1.8973786 | 1.4490027  | -0.3535805 |
| H | -0.1653017 | -0.1849678 | -0.8719003 |
| H | -3.1506838 | -1.0667556 | -3.0415056 |
| H | -3.4649889 | -0.0848074 | -5.2725947 |
| H | -0.1153200 | 2.5408784  | -4.6088506 |
| H | 0.2167171  | 1.5385269  | -2.3663724 |
| H | -3.8520908 | -1.8141572 | 2.6497879  |
| H | -4.3776731 | -0.1386386 | 2.5795859  |

|   |            |            |            |
|---|------------|------------|------------|
| H | -4.1002643 | 1.0622625  | 0.2215895  |
| H | -3.9055034 | 0.0826634  | -1.2209526 |
| H | -3.6313963 | -1.9625146 | 0.2491562  |
| H | -5.1590044 | -1.1534033 | 0.5199551  |
| H | 0.0212579  | -3.7101033 | -2.2432999 |
| H | -0.4771824 | -2.3860485 | -3.3328607 |
| H | 0.8002198  | -2.0947838 | -2.0965893 |
| H | -0.4066044 | -3.7816531 | 0.2603295  |
| H | -1.2534354 | -2.5198058 | 1.2190214  |
| H | 0.3550396  | -2.1687664 | 0.4924679  |
| H | -0.0360937 | 0.9538749  | 2.6540402  |
| H | 0.6239121  | -0.0937845 | 1.4063048  |
| H | 0.1046997  | 1.5364301  | 0.9801372  |

2b\_sy\_tr\_2\_r.log

E = -1188.219526

H = -1187.854152

G = -1187.924078

NImag=0

|   |            |            |            |
|---|------------|------------|------------|
| C | 1.3126682  | -1.5615427 | -1.0175497 |
| C | 1.2146221  | -0.9669777 | 0.3742043  |
| C | 0.7310235  | -2.7756013 | -1.3561317 |
| O | 0.8121902  | -3.3278519 | -2.5111987 |
| C | 0.1606947  | 0.1762532  | 0.3651325  |
| C | 0.5111107  | 1.3138737  | -0.5606461 |
| C | 1.7194984  | 2.0081912  | -0.4234437 |
| C | 2.0421980  | 3.0380814  | -1.2963116 |
| C | 1.1475953  | 3.3730786  | -2.3215222 |
| C | -0.0659093 | 2.6923766  | -2.4658256 |
| C | -0.3795048 | 1.6702949  | -1.5763292 |
| C | -0.0135254 | -3.5961139 | -0.2964076 |
| C | 0.9081923  | -2.0390263 | 1.4247785  |
| C | -0.3021567 | -2.8760444 | 1.0198956  |
| S | -0.0579153 | 0.9157286  | 2.0936405  |
| C | -0.8730935 | 2.4992106  | 1.7858887  |
| C | -1.4803685 | 0.0114825  | 2.7492736  |
| C | 1.4791931  | 4.4355776  | -3.2337681 |
| N | 1.7458536  | 5.2912522  | -3.9671596 |
| C | 2.1708018  | -0.8633503 | -2.0457720 |
| H | 2.1749466  | -0.4974301 | 0.6381384  |
| H | -0.8350930 | -0.2064958 | 0.1210401  |
| H | 2.4210015  | 1.7448547  | 0.3642989  |
| H | 2.9775829  | 3.5778706  | -1.1935105 |
| H | -0.7511821 | 2.9635423  | -3.2620875 |
| H | -1.3187987 | 1.1347362  | -1.6799007 |
| H | -0.9413607 | -3.9641712 | -0.7499683 |
| H | 0.6042864  | -4.4857608 | -0.1047359 |
| H | 1.7864168  | -2.6931553 | 1.4921134  |
| H | 0.7862203  | -1.6047008 | 2.4256056  |
| H | -1.1857128 | -2.2348672 | 0.9035841  |
| H | -0.5471614 | -3.5975289 | 1.8081008  |
| H | -1.2275916 | 2.8548130  | 2.7556039  |
| H | -0.1399162 | 3.1970042  | 1.3815935  |
| H | -1.7070936 | 2.3554833  | 1.0958508  |
| H | -1.7947278 | 0.5406930  | 3.6510287  |
| H | -1.1733565 | -1.0011802 | 3.0066263  |
| H | -2.2783953 | 0.0077672  | 2.0043107  |
| H | 2.5841449  | -1.6064527 | -2.7370060 |
| H | 1.6432139  | -0.1209398 | -2.6671936 |
| H | 3.0064565  | -0.3288872 | -1.5731196 |



2b\_sy\_tr\_2\_ts1.log

E = -1188.196708

H = -1187.834290

G = -1187.905447

NImag=1

|   |            |            |            |
|---|------------|------------|------------|
| C | 2.3638586  | -1.0904754 | 0.8771830  |
| C | 1.0496815  | -1.1638014 | 0.3874609  |
| C | 3.4928605  | -1.1967949 | 0.0115402  |
| O | 4.6711877  | -1.0766993 | 0.4151185  |
| C | 0.0679032  | 0.7066033  | 0.5272779  |
| C | -1.3376131 | 0.3983575  | 0.3408240  |
| C | -2.0394710 | 0.5609388  | -0.8779245 |
| C | -3.3532555 | 0.1460646  | -1.0118322 |
| C | -4.0148571 | -0.4584359 | 0.0695592  |
| C | -3.3383298 | -0.6381333 | 1.2866658  |
| C | -2.0272378 | -0.2139112 | 1.4155514  |
| C | 3.2664222  | -1.5394691 | -1.4579266 |
| C | 0.7971723  | -1.6232474 | -1.0277642 |
| C | 1.8883323  | -1.1405305 | -1.9776759 |
| S | 0.7006589  | 1.9560022  | -0.5430879 |
| C | 0.0661450  | 3.5249920  | 0.1090734  |
| C | 2.4225152  | 2.1051600  | -0.0302351 |
| C | -5.3742068 | -0.8856302 | -0.0675997 |
| N | -6.4759336 | -1.2328194 | -0.1787553 |
| C | 2.6087372  | -0.7777379 | 2.3279690  |
| H | 0.2880434  | -1.4778177 | 1.1046164  |
| H | 0.3576661  | 0.9247467  | 1.5566739  |
| H | -1.5545230 | 1.0175948  | -1.7367556 |
| H | -3.8750395 | 0.2861021  | -1.9534135 |
| H | -3.8482029 | -1.1021722 | 2.1252993  |
| H | -1.5151906 | -0.3427134 | 2.3655501  |
| H | 4.0660352  | -1.0675456 | -2.0381113 |
| H | 3.4005791  | -2.6263579 | -1.5589401 |
| H | 0.7816021  | -2.7232479 | -1.0214553 |
| H | -0.1930649 | -1.3011231 | -1.3668141 |
| H | 1.8346319  | -0.0478684 | -2.0737954 |
| H | 1.7261575  | -1.5458669 | -2.9819791 |
| H | 0.5236374  | 4.3391753  | -0.4576173 |
| H | -1.0150134 | 3.5242401  | -0.0415386 |
| H | 0.3123611  | 3.5944441  | 1.1706393  |
| H | 2.7941628  | 3.0377410  | -0.4587466 |
| H | 2.9844357  | 1.2618010  | -0.4288081 |
| H | 2.4720270  | 2.1312533  | 1.0602459  |
| H | 3.3945799  | -1.4125989 | 2.7518412  |
| H | 2.9381687  | 0.2621944  | 2.4773641  |
| H | 1.6961367  | -0.9203755 | 2.9176619  |

2b\_sy\_tr\_2\_ts2.log

E = -1188.213398

H = -1187.849670

G = -1187.919527

NImag=1

|   |            |            |            |
|---|------------|------------|------------|
| C | 1.4411750  | -1.6704830 | -0.5011500 |
| C | 1.5393910  | -0.2585330 | -1.0426500 |
| C | 2.4042590  | -2.1840470 | 0.3814400  |
| O | 2.3491430  | -3.3501320 | 0.8767420  |
| C | 0.6485860  | 0.3869750  | -0.0223080 |
| C | -0.8045700 | 0.0661330  | 0.0018480  |
| C | -1.5658890 | 0.0484610  | -1.1754980 |
| C | -2.9276290 | -0.2141920 | -1.1297500 |

|   |            |            |            |
|---|------------|------------|------------|
| C | -3.5373660 | -0.4677780 | 0.1067680  |
| C | -2.7914880 | -0.4530500 | 1.2907830  |
| C | -1.4304480 | -0.1781920 | 1.2297900  |
| C | 3.6684700  | -1.3786960 | 0.6956870  |
| C | 2.9657570  | 0.2870280  | -1.0634290 |
| C | 3.6629000  | 0.0943430  | 0.2825760  |
| S | 0.5748240  | 2.5609810  | -0.4257640 |
| C | -0.8830310 | 3.0856690  | 0.5042320  |
| C | 1.8537080  | 3.1767620  | 0.6944300  |
| C | -4.9480760 | -0.7446850 | 0.1589590  |
| N | -6.0840820 | -0.9665960 | 0.2008810  |
| C | 0.3365220  | -2.5823710 | -0.9682090 |
| H | 1.0968590  | -0.1879980 | -2.0436770 |
| H | 1.0817960  | 0.4694220  | 0.9749020  |
| H | -1.0956720 | 0.2462450  | -2.1346920 |
| H | -3.5197660 | -0.2242730 | -2.0387250 |
| H | -3.2748870 | -0.6519770 | 2.2415290  |
| H | -0.8416700 | -0.1614200 | 2.1427240  |
| H | 3.8740090  | -1.4790560 | 1.7673560  |
| H | 4.4835690  | -1.9064720 | 0.1801930  |
| H | 3.5159110  | -0.2603680 | -1.8389620 |
| H | 2.9750120  | 1.3434940  | -1.3617760 |
| H | 3.1643280  | 0.6919610  | 1.0542890  |
| H | 4.6895280  | 0.4730740  | 0.2258330  |
| H | -0.8859050 | 4.1770710  | 0.5445880  |
| H | -1.7717950 | 2.7375040  | -0.0247880 |
| H | -0.8530770 | 2.6694590  | 1.5141950  |
| H | 1.7213590  | 4.2554680  | 0.8024890  |
| H | 2.8301160  | 2.9743110  | 0.2527370  |
| H | 1.7637610  | 2.6865220  | 1.6667770  |
| H | 0.7301220  | -3.5964850 | -1.1046510 |
| H | -0.5083460 | -2.6716590 | -0.2660340 |
| H | -0.0788490 | -2.2460780 | -1.9248930 |

2b\_sy\_tr\_3.log

E = -1188.213041

H = -1187.847617

G = -1187.916449

NImag=0

|   |            |            |            |
|---|------------|------------|------------|
| C | -1.5641630 | -0.1348334 | 1.2796164  |
| C | -1.9628631 | 0.2399020  | -0.1255324 |
| C | -2.4306245 | -0.7145519 | 2.1950410  |
| O | -2.1295572 | -1.0498972 | 3.3964809  |
| C | -0.9489222 | -0.2681348 | -1.2022629 |
| C | -1.2688526 | 0.2325343  | -2.5927639 |
| C | -2.1153870 | -0.4520263 | -3.4721825 |
| C | -2.4332119 | 0.0871982  | -4.7124800 |
| C | -1.9056424 | 1.3321361  | -5.0749020 |
| C | -1.0623070 | 2.0317914  | -4.2044947 |
| C | -0.7469006 | 1.4747084  | -2.9713779 |
| C | -3.8890704 | -0.9341750 | 1.7776607  |
| C | -3.4211855 | -0.0649868 | -0.5115000 |
| C | -4.3430017 | 0.0423781  | 0.6970499  |
| S | -0.5891362 | -2.0913411 | -1.3042920 |
| C | 0.5884005  | -2.3939087 | 0.0274423  |
| C | -1.9836268 | -3.0689688 | -0.7010428 |
| C | -2.2312659 | 1.8968021  | -6.3571754 |
| N | -2.4933905 | 2.3519887  | -7.3894253 |
| C | -0.2329743 | 0.3967186  | 1.7441812  |
| H | -1.8215331 | 1.3334013  | -0.2433170 |
| H | 0.0458006  | 0.0993688  | -0.9232253 |

|   |            |            |            |
|---|------------|------------|------------|
| H | -2.5471833 | -1.4120901 | -3.1999966 |
| H | -3.0874133 | -0.4462824 | -5.3938289 |
| H | -0.6559236 | 2.9945505  | -4.4961285 |
| H | -0.0863385 | 2.0085566  | -2.2936284 |
| H | -4.0355774 | -1.9689250 | 1.4305033  |
| H | -4.4921450 | -0.8250629 | 2.6858273  |
| H | -3.7373851 | 0.6213723  | -1.3046996 |
| H | -3.5212121 | -1.0744833 | -0.9236696 |
| H | -5.3780638 | -0.1560813 | 0.3950388  |
| H | -4.3141285 | 1.0659505  | 1.0947287  |
| H | 0.8905395  | -3.4385234 | -0.0719507 |
| H | 1.4501129  | -1.7446364 | -0.1336209 |
| H | 0.1089482  | -2.2065177 | 0.9883501  |
| H | -1.5914816 | -4.0859656 | -0.6201739 |
| H | -2.7831089 | -3.0472392 | -1.4414893 |
| H | -2.3056917 | -2.6963379 | 0.2707814  |
| H | -0.1506158 | 0.2669864  | 2.8273998  |
| H | 0.6524641  | -0.0778984 | 1.2949729  |
| H | -0.1371811 | 1.4725233  | 1.5192859  |

2b\_sy\_tr\_3\_r.log

E = -1188.210536  
H = -1187.844775  
G = -1187.913962

NImag=0

|   |            |            |            |
|---|------------|------------|------------|
| C | 1.2541381  | -1.4996381 | -0.7144032 |
| C | 1.1271478  | -0.6848989 | 0.5648996  |
| C | 0.8772437  | -2.8351079 | -0.8152944 |
| O | 0.9381293  | -3.5285735 | -1.8917448 |
| C | 0.1104363  | 0.4703601  | 0.3415367  |
| C | 0.3788829  | 1.4022609  | -0.8196904 |
| C | 1.5894275  | 2.0964839  | -0.9302665 |
| C | 1.8201857  | 2.9444087  | -2.0050935 |
| C | 0.8290026  | 3.0969913  | -2.9828984 |
| C | -0.3877260 | 2.4134191  | -2.8831534 |
| C | -0.6064916 | 1.5754165  | -1.7957305 |
| C | 0.4460529  | -3.5853931 | 0.4459330  |
| C | 0.6613136  | -1.5163827 | 1.7800019  |
| C | 1.0714621  | -2.9793913 | 1.6946691  |
| S | -0.1722926 | 1.6705533  | 1.7781329  |
| C | -1.1890514 | 0.8344651  | 3.0152858  |
| C | 1.3963352  | 1.8491708  | 2.6519780  |
| C | 1.0652720  | 3.9689693  | -4.1027499 |
| N | 1.2553043  | 4.6717623  | -5.0034317 |
| C | 2.0055014  | -0.9099476 | -1.8864132 |
| H | 2.1003062  | -0.2160924 | 0.7951651  |
| H | -0.8922745 | 0.0401070  | 0.2334405  |
| H | 2.3758013  | 1.9520547  | -0.1950607 |
| H | 2.7604033  | 3.4778483  | -2.0966890 |
| H | -1.1478621 | 2.5393512  | -3.6470103 |
| H | -1.5472870 | 1.0390731  | -1.7109025 |
| H | -0.6499428 | -3.5833372 | 0.5417278  |
| H | 0.7496863  | -4.6288260 | 0.3078325  |
| H | 1.0371713  | -1.0731241 | 2.7083743  |
| H | -0.4357952 | -1.4946281 | 1.8343093  |
| H | 0.7474503  | -3.5051424 | 2.6005197  |
| H | 2.1647394  | -3.0660854 | 1.6412063  |
| H | -1.5279194 | 1.6180678  | 3.6962672  |
| H | -2.0474227 | 0.3997157  | 2.5000645  |
| H | -0.6201776 | 0.0768423  | 3.5503722  |
| H | 1.1682970  | 2.4300121  | 3.5488711  |

|   |           |            |            |
|---|-----------|------------|------------|
| H | 2.0805404 | 2.4156568  | 2.0199244  |
| H | 1.8098774 | 0.8774269  | 2.9194214  |
| H | 2.4479393 | -1.7285564 | -2.4649333 |
| H | 1.4042155 | -0.3186188 | -2.5951042 |
| H | 2.8152529 | -0.2483663 | -1.5477227 |

2b\_sy\_tr\_4.log

E = -1188.209724

H = -1187.844162

G = -1187.913236

NImag=0

|   |            |            |            |
|---|------------|------------|------------|
| C | -1.6485376 | 0.1376363  | 1.3377361  |
| C | -2.1982663 | 0.2370954  | -0.0696621 |
| C | -2.2415706 | -0.5980123 | 2.3464354  |
| O | -1.6996520 | -0.8596071 | 3.4818141  |
| C | -1.0919407 | -0.0894281 | -1.1158940 |
| C | -1.3449391 | 0.3261969  | -2.5513066 |
| C | -2.4316469 | -0.1359306 | -3.3078215 |
| C | -2.6387943 | 0.3233650  | -4.6026912 |
| C | -1.7524920 | 1.2558415  | -5.1539228 |
| C | -0.6598348 | 1.7242782  | -4.4178801 |
| C | -0.4647094 | 1.2534725  | -3.1249861 |
| C | -3.6488268 | -1.1503071 | 2.1272822  |
| C | -3.5128353 | -0.5288140 | -0.2785057 |
| C | -4.3831707 | -0.4807580 | 0.9725734  |
| S | -0.3521183 | -1.8130374 | -1.1338655 |
| C | -0.6323464 | -2.6278896 | 0.4588271  |
| C | -1.3415609 | -2.8759051 | -2.2070958 |
| C | -1.9670643 | 1.7355194  | -6.4937682 |
| N | -2.1392000 | 2.1214950  | -7.5718693 |
| C | -0.3131480 | 0.7794033  | 1.6035530  |
| H | -2.3856850 | 1.3004814  | -0.3209833 |
| H | -0.1990195 | 0.4538350  | -0.7968498 |
| H | -3.1213073 | -0.8666915 | -2.9023433 |
| H | -3.4804058 | -0.0366536 | -5.1848272 |
| H | 0.0242336  | 2.4451160  | -4.8528856 |
| H | 0.3819971  | 1.6166887  | -2.5496326 |
| H | -3.5813410 | -2.2353815 | 1.9473248  |
| H | -4.1943497 | -1.0290758 | 3.0707431  |
| H | -4.0571619 | -0.1156458 | -1.1326323 |
| H | -3.3111049 | -1.5843350 | -0.5049586 |
| H | -5.3425554 | -0.9737854 | 0.7772108  |
| H | -4.6040132 | 0.5647705  | 1.2264374  |
| H | -0.1304879 | -3.5935794 | 0.3561692  |
| H | -0.1654929 | -2.0350477 | 1.2447427  |
| H | -1.6978366 | -2.7580367 | 0.6443234  |
| H | -0.9094718 | -3.8728746 | -2.0929136 |
| H | -1.2113028 | -2.5429875 | -3.2362845 |
| H | -2.3903172 | -2.8780030 | -1.9114728 |
| H | -0.2024154 | 0.9689503  | 2.6753071  |
| H | 0.5612529  | 0.1653208  | 1.3111427  |
| H | -0.2032608 | 1.7362207  | 1.0712299  |

2b\_sy\_tr\_4\_ts1.log

E = -1188.190142

H = -1187.827116

G = -1187.897392

NImag=1

|   |           |            |           |
|---|-----------|------------|-----------|
| C | 2.5698532 | -0.6790460 | 0.8987127 |
| C | 1.1893531 | -0.9239823 | 0.7804470 |

|   |            |            |            |
|---|------------|------------|------------|
| C | 3.4828921  | -1.0106500 | -0.1473954 |
| O | 4.6911741  | -0.6842453 | -0.1338818 |
| C | 0.0813260  | 0.8783356  | 0.8131746  |
| C | -1.2896123 | 0.5246170  | 0.5077134  |
| C | -1.8773924 | 0.5738226  | -0.7771477 |
| C | -3.1576692 | 0.0947373  | -1.0014054 |
| C | -3.8949267 | -0.4663263 | 0.0527507  |
| C | -3.3317195 | -0.5325829 | 1.3380210  |
| C | -2.0578784 | -0.0400451 | 1.5562698  |
| C | 2.9816907  | -1.8748451 | -1.3029478 |
| C | 0.6557716  | -1.6564936 | -0.4376667 |
| C | 1.7007731  | -2.6357950 | -0.9729193 |
| S | 0.9679802  | 2.1403433  | -0.0283387 |
| C | 1.4412913  | 1.5771145  | -1.6780245 |
| C | -0.1639320 | 3.4906633  | -0.4466873 |
| C | -5.2158130 | -0.9668932 | -0.1804534 |
| N | -6.2862109 | -1.3732450 | -0.3693235 |
| C | 3.0969403  | 0.0074919  | 2.1298063  |
| H | 0.6530920  | -1.1205489 | 1.7102879  |
| H | 0.2700533  | 1.0633324  | 1.8690600  |
| H | -1.3326285 | 0.9807833  | -1.6212652 |
| H | -3.5905227 | 0.1456304  | -1.9956174 |
| H | -3.9009463 | -0.9624028 | 2.1564838  |
| H | -1.6338235 | -0.0832065 | 2.5558764  |
| H | 2.8109760  | -1.2269017 | -2.1758519 |
| H | 3.7989681  | -2.5513913 | -1.5740470 |
| H | -0.2790951 | -2.1675982 | -0.1862106 |
| H | 0.4154147  | -0.9455362 | -1.2385297 |
| H | 1.3155357  | -3.1456056 | -1.8627167 |
| H | 1.9097077  | -3.4054703 | -0.2199232 |
| H | 1.9680536  | 2.4167895  | -2.1369636 |
| H | 2.1299652  | 0.7437543  | -1.5493260 |
| H | 0.5803164  | 1.2939038  | -2.2814926 |
| H | 0.4289333  | 4.2595359  | -0.9469818 |
| H | -0.5615110 | 3.8768212  | 0.4932454  |
| H | -0.9679217 | 3.1433817  | -1.0954886 |
| H | 4.0871129  | -0.3698575 | 2.4047435  |
| H | 3.2043494  | 1.0941439  | 1.9893751  |
| H | 2.4204873  | -0.1423732 | 2.9793854  |

2b\_sy\_tr\_prod\_1.log

E = -710.338002

H = -710.056222

G = -710.114710

NImag=0

|   |            |            |            |
|---|------------|------------|------------|
| C | 1.8239530  | -0.1721755 | 1.1671979  |
| C | 0.9736663  | -1.4344023 | 1.2199408  |
| C | 0.7962070  | -0.5014398 | 0.0705756  |
| C | -0.3816679 | 0.3971841  | -0.1084146 |
| C | -1.6074289 | 0.1656474  | 0.5254854  |
| C | -2.6828023 | 1.0260337  | 0.3309392  |
| C | -2.5334718 | 2.1345110  | -0.5099800 |
| C | -1.3143532 | 2.3803166  | -1.1564791 |
| C | -0.2518880 | 1.5112198  | -0.9509923 |
| H | 1.2323098  | -0.8289239 | -0.8716230 |
| C | 1.5349887  | 0.9712077  | 2.1101343  |
| H | 0.2064628  | -1.3874355 | 1.9888212  |
| C | 1.5951639  | -2.8105790 | 0.9871663  |
| C | 3.1231502  | -2.7855048 | 1.0311028  |
| C | 3.6753957  | -1.6450726 | 0.1661468  |
| C | 3.2510740  | -0.3170693 | 0.7537603  |

|   |            |            |            |
|---|------------|------------|------------|
| O | 4.0510879  | 0.5884110  | 0.9387445  |
| C | -3.6418819 | 3.0269402  | -0.7153575 |
| N | -4.5349435 | 3.7462402  | -0.8808778 |
| H | -1.7311482 | -0.6967322 | 1.1728114  |
| H | -3.6329398 | 0.8409629  | 0.8214589  |
| H | -1.2082055 | 3.2421860  | -1.8072208 |
| H | 0.6970080  | 1.6967790  | -1.4473218 |
| H | 1.7363324  | 1.9361983  | 1.6341179  |
| H | 0.4890855  | 0.9550054  | 2.4273967  |
| H | 2.1652196  | 0.8961523  | 3.0015129  |
| H | 1.2177701  | -3.5034666 | 1.7446485  |
| H | 1.2700668  | -3.1932103 | 0.0121572  |
| H | 3.5269300  | -3.7428967 | 0.6881513  |
| H | 3.4615555  | -2.6428636 | 2.0651473  |
| H | 3.2903763  | -1.7373911 | -0.8581064 |
| H | 4.7668275  | -1.6549326 | 0.1178561  |

2b\_sy\_tr\_prod\_2.log

E = -710.338504

H = -710.056883

G = -710.115660

NImag=0

|   |            |            |            |
|---|------------|------------|------------|
| C | 1.8074537  | -0.1593280 | 1.3324123  |
| C | 0.9728579  | -1.4223126 | 1.3638949  |
| C | 0.8405314  | -0.5161986 | 0.1850748  |
| C | -0.3352165 | 0.3701414  | -0.0571304 |
| C | -1.5865374 | 0.1368095  | 0.5243198  |
| C | -2.6574265 | 0.9884522  | 0.2746435  |
| C | -2.4782093 | 2.0901424  | -0.5693118 |
| C | -1.2337506 | 2.3366666  | -1.1652004 |
| C | -0.1762078 | 1.4762951  | -0.9051946 |
| H | 1.3281606  | -0.8287588 | -0.7350407 |
| C | 1.4587402  | 1.0084239  | 2.2257228  |
| H | 0.1638600  | -1.3848584 | 2.0901108  |
| C | 1.6420079  | -2.7750533 | 1.2139796  |
| C | 2.8239158  | -2.7336778 | 0.2456101  |
| C | 3.8275643  | -1.6496795 | 0.6399927  |
| C | 3.2581470  | -0.2876521 | 0.9949191  |
| O | 4.0005488  | 0.6794051  | 1.0801213  |
| C | -3.5810643 | 2.9749574  | -0.8299330 |
| N | -4.4694659 | 3.6883971  | -1.0400079 |
| H | -1.7334475 | -0.7201139 | 1.1739389  |
| H | -3.6269940 | 0.8023236  | 0.7251307  |
| H | -1.1046024 | 3.1928429  | -1.8192437 |
| H | 0.7921749  | 1.6626615  | -1.3620185 |
| H | 1.6723598  | 1.9618289  | 1.7326333  |
| H | 0.3984986  | 0.9867348  | 2.4906989  |
| H | 2.0432395  | 0.9669899  | 3.1500691  |
| H | 1.9944974  | -3.0992002 | 2.2013018  |
| H | 0.9047697  | -3.5117024 | 0.8759818  |
| H | 2.4699003  | -2.5702071 | -0.7774102 |
| H | 3.3306000  | -3.7033843 | 0.2436129  |
| H | 4.5985919  | -1.5062133 | -0.1225600 |
| H | 4.3493024  | -1.9616319 | 1.5568823  |

2c.log

E = -347.858736

H = -347.694230

G = -347.734626

NImag=0

|   |            |            |            |
|---|------------|------------|------------|
| C | -0.0242654 | 0.8178314  | -0.7870990 |
| C | 0.6247208  | -0.3640732 | -0.8185145 |
| C | 0.0667766  | -1.5901415 | -0.1437263 |
| C | -0.9382326 | -1.2471192 | 0.9527045  |
| C | -1.9818612 | -0.2605679 | 0.4326379  |
| C | -1.3392020 | 0.9806932  | -0.1470572 |
| O | -1.9060339 | 2.0678163  | -0.1245316 |
| C | 1.9273840  | -0.5340698 | -1.5361939 |
| H | 0.3934632  | 1.6991407  | -1.2694235 |
| H | -0.4104847 | -2.2110749 | -0.9169063 |
| H | 0.8955867  | -2.1849269 | 0.2562490  |
| H | -1.4260879 | -2.1549996 | 1.3187197  |
| H | -0.4060253 | -0.7978506 | 1.8002179  |
| H | -2.5568406 | -0.7260570 | -0.3815110 |
| H | -2.6919207 | 0.0435743  | 1.2060567  |
| H | 2.2269248  | 0.3749620  | -2.0624913 |
| H | 2.7136536  | -0.8112821 | -0.8243583 |
| H | 1.8513436  | -1.3562552 | -2.2577708 |

2c\_sy\_c\_1.log

E = -1188.221464

H = -1187.856149

G = -1187.925399

NImag=0

|   |            |            |            |
|---|------------|------------|------------|
| C | -4.5060822 | 2.3976240  | -2.5370028 |
| C | -3.8178913 | 2.4265724  | -1.1958208 |
| C | -3.8937788 | 2.5867603  | -3.7624736 |
| O | -4.4547472 | 2.4030779  | -4.8971117 |
| C | -3.3643392 | 0.9646840  | -0.8024740 |
| C | -2.9266981 | 0.7438840  | 0.6260008  |
| C | -3.8272225 | 0.6684038  | 1.6982045  |
| C | -3.3694497 | 0.5020361  | 2.9979559  |
| C | -1.9915797 | 0.4178882  | 3.2361758  |
| C | -1.0786906 | 0.4886398  | 2.1791261  |
| C | -1.5542494 | 0.6439317  | 0.8817520  |
| C | -2.4522941 | 3.1066260  | -3.7934899 |
| C | -2.5376938 | 3.2805221  | -1.2715025 |
| C | -1.6722382 | 2.9479310  | -2.4868686 |
| S | -4.7007105 | -0.2477516 | -1.2761051 |
| C | -4.2942846 | -0.6911255 | -2.9852923 |
| C | -4.1361636 | -1.7717480 | -0.4802414 |
| C | -1.5114063 | 0.2498745  | 4.5819744  |
| N | -1.1249345 | 0.1147055  | 5.6653512  |
| C | -4.7566044 | 3.0166719  | -0.1374985 |
| H | -5.5552493 | 2.0918893  | -2.5441040 |
| H | -2.5443942 | 0.6722418  | -1.4647922 |
| H | -4.8989182 | 0.7336668  | 1.5296494  |
| H | -4.0694385 | 0.4391517  | 3.8244113  |
| H | -0.0136833 | 0.4154724  | 2.3723058  |
| H | -0.8499651 | 0.6918406  | 0.0554908  |
| H | -1.9328035 | 2.6052631  | -4.6181594 |
| H | -2.5081180 | 4.1700505  | -4.0679679 |
| H | -2.8574665 | 4.3292279  | -1.3350603 |
| H | -1.9582417 | 3.1805340  | -0.3441885 |
| H | -1.2927757 | 1.9212471  | -2.4082043 |
| H | -0.7875088 | 3.5948316  | -2.4928901 |
| H | -4.8165917 | -1.6290975 | -3.1877944 |
| H | -4.6416219 | 0.1043456  | -3.6441429 |
| H | -3.2131148 | -0.8257123 | -3.0670951 |
| H | -4.7135901 | -2.5834855 | -0.9269965 |
| H | -4.3477011 | -1.7169672 | 0.5866575  |

|   |            |            |            |
|---|------------|------------|------------|
| H | -3.0686428 | -1.9106738 | -0.6651867 |
| H | -5.6614868 | 2.4085578  | -0.0127615 |
| H | -4.2747280 | 3.1248278  | 0.8398024  |
| H | -5.0732014 | 4.0092801  | -0.4718328 |

2c\_sy\_c\_1\_r.log

E = -1188.215464  
H = -1187.850298  
G = -1187.919253

NImag=0

|   |            |            |            |
|---|------------|------------|------------|
| C | 0.5259049  | -0.5211218 | 2.1400438  |
| C | 1.2547840  | -0.5387599 | 0.8154444  |
| C | 1.0297673  | -0.1003713 | 3.3591824  |
| O | 0.4187120  | -0.1808308 | 4.4805809  |
| C | 0.3678668  | 0.3197422  | -0.1672574 |
| C | 0.4293633  | 1.8150743  | 0.0458154  |
| C | 1.4557619  | 2.6094169  | -0.4818703 |
| C | 1.5055320  | 3.9715676  | -0.2191763 |
| C | 0.5190030  | 4.5500100  | 0.5887113  |
| C | -0.5191959 | 3.7739657  | 1.1145677  |
| C | -0.5620669 | 2.4133864  | 0.8299889  |
| C | 2.4449110  | 0.4808226  | 3.3941780  |
| C | 2.7005295  | -0.0122257 | 0.9492330  |
| C | 2.9026852  | 1.0325078  | 2.0482516  |
| S | 0.7166243  | -0.0002200 | -1.9927276 |
| C | -0.2822279 | -1.4600677 | -2.3860543 |
| C | -0.3366872 | 1.2303187  | -2.8028167 |
| C | 0.5669506  | 5.9604881  | 0.8686479  |
| N | 0.6056045  | 7.0960609  | 1.0928496  |
| C | 1.3243419  | -1.9833847 | 0.2875388  |
| H | -0.4718826 | -0.9656710 | 2.1354743  |
| H | -0.6691159 | -0.0192811 | -0.0640668 |
| H | 2.2389160  | 2.1752292  | -1.0987134 |
| H | 2.3023743  | 4.5833156  | -0.6288405 |
| H | -1.2845572 | 4.2333889  | 1.7312115  |
| H | -1.3699983 | 1.8067909  | 1.2270838  |
| H | 2.4633314  | 1.2607096  | 4.1638165  |
| H | 3.1304702  | -0.3104683 | 3.7322426  |
| H | 3.3328543  | -0.8744439 | 1.1992518  |
| H | 3.0660822  | 0.3531604  | -0.0196944 |
| H | 2.3414451  | 1.9468273  | 1.8318832  |
| H | 3.9622124  | 1.3135059  | 2.0849865  |
| H | -0.4653026 | -1.4161420 | -3.4612891 |
| H | 0.2806531  | -2.3587048 | -2.1467085 |
| H | -1.2228604 | -1.4169432 | -1.8330381 |
| H | -0.4089211 | 0.9302778  | -3.8498724 |
| H | 0.1371294  | 2.2076088  | -2.7303109 |
| H | -1.3212264 | 1.2303107  | -2.3295312 |
| H | 0.3241698  | -2.4024053 | 0.1319778  |
| H | 1.9026025  | -2.0693294 | -0.6437680 |
| H | 1.8302048  | -2.5987860 | 1.0365203  |

2c\_sy\_c\_1\_ts1.log

E = -1188.197325  
H = -1187.835277  
G = -1187.905201

NImag=1

|   |           |            |           |
|---|-----------|------------|-----------|
| C | 2.4172900 | -0.5815380 | 1.1772323 |
| C | 1.2613775 | -1.1236564 | 0.5807384 |
| C | 3.7227743 | -0.6761157 | 0.6176193 |



|   |            |            |            |
|---|------------|------------|------------|
| O | 4.7454813  | -0.2176658 | 1.1708408  |
| C | 0.1542534  | 0.4565521  | -0.4868127 |
| C | -1.2686157 | 0.2708367  | -0.3255491 |
| C | -2.0083046 | 0.7458239  | 0.7858082  |
| C | -3.3471364 | 0.4353325  | 0.9456818  |
| C | -4.0030267 | -0.3653569 | -0.0035968 |
| C | -3.2950063 | -0.8378626 | -1.1229725 |
| C | -1.9595567 | -0.5179405 | -1.2798218 |
| C | 3.8914864  | -1.4392508 | -0.6925187 |
| C | 1.4490312  | -2.0188382 | -0.6251434 |
| C | 2.6056615  | -1.5605122 | -1.5070791 |
| S | 0.8332882  | 1.9301738  | 0.2323005  |
| C | 2.3127353  | 2.1723294  | -0.7701717 |
| C | -0.1436623 | 3.3121736  | -0.4189660 |
| C | -5.3869097 | -0.6883299 | 0.1623418  |
| N | -6.5094278 | -0.9513554 | 0.2970714  |
| C | 0.1572998  | -1.5450659 | 1.5179538  |
| H | 2.3342764  | -0.1012084 | 2.1516382  |
| H | 0.5146908  | 0.3517898  | -1.5091635 |
| H | -1.5259558 | 1.3492918  | 1.5511551  |
| H | -3.8931302 | 0.8058362  | 1.8078957  |
| H | -3.8028147 | -1.4460818 | -1.8652706 |
| H | -1.4219962 | -0.8795076 | -2.1521688 |
| H | 4.6866349  | -0.9517555 | -1.2663760 |
| H | 4.2620749  | -2.4394270 | -0.4256026 |
| H | 1.6577254  | -3.0309532 | -0.2430777 |
| H | 0.5132448  | -2.0863907 | -1.1916533 |
| H | 2.3621317  | -0.5862037 | -1.9490191 |
| H | 2.7483956  | -2.2591011 | -2.3380478 |
| H | 2.7344856  | 3.1389024  | -0.4888624 |
| H | 3.0174033  | 1.3760430  | -0.5404086 |
| H | 2.0275487  | 2.1609825  | -1.8242171 |
| H | 0.3644471  | 4.2343457  | -0.1272834 |
| H | -1.1346780 | 3.2792387  | 0.0344581  |
| H | -0.2100705 | 3.2256400  | -1.5049101 |
| H | -0.0841503 | -0.7575690 | 2.2399173  |
| H | -0.7550988 | -1.8345736 | 0.9906574  |
| H | 0.5111485  | -2.4165232 | 2.0830857  |

2c\_sy\_c\_1\_ts2.log

E = -1188.206877  
H = -1187.843183  
G = -1187.912240

NImag=1

|   |            |            |            |
|---|------------|------------|------------|
| C | -1.9278263 | 1.3246460  | -0.9095594 |
| C | -2.0235930 | 0.2869512  | 0.1854530  |
| C | -1.5617436 | 2.6697419  | -0.7405185 |
| O | -1.5120292 | 3.5095678  | -1.6820783 |
| C | -0.8961115 | -0.5346322 | -0.3933876 |
| C | 0.5611791  | -0.2281886 | -0.2349173 |
| C | 1.2039829  | -0.2881769 | 1.0096021  |
| C | 2.5727699  | -0.0802858 | 1.1117585  |
| C | 3.3152195  | 0.1851901  | -0.0455083 |
| C | 2.6937915  | 0.2319017  | -1.2988339 |
| C | 1.3241265  | 0.0141361  | -1.3841197 |
| C | -1.3060779 | 3.1819181  | 0.6741200  |
| C | -1.8175637 | 0.8827664  | 1.5874185  |
| C | -0.8889058 | 2.0977495  | 1.6626886  |
| S | -0.9021439 | -2.6171496 | 0.4411183  |
| C | -2.1488885 | -3.4300459 | -0.5887002 |
| C | 0.5682799  | -3.2813344 | -0.3795796 |

|   |            |            |            |
|---|------------|------------|------------|
| C | 4.7341340  | 0.3999621  | 0.0541863  |
| N | 5.8765942  | 0.5724737  | 0.1345985  |
| C | -3.3488436 | -0.4764640 | 0.1480081  |
| H | -2.2483626 | 1.0177618  | -1.9040017 |
| H | -1.1345404 | -0.8925062 | -1.3970184 |
| H | 0.6386957  | -0.5092214 | 1.9103544  |
| H | 3.0668945  | -0.1280815 | 2.0763468  |
| H | 3.2789249  | 0.4301566  | -2.1906655 |
| H | 0.8350016  | 0.0401519  | -2.3536777 |
| H | -0.5497962 | 3.9718426  | 0.6170883  |
| H | -2.2377956 | 3.6616749  | 1.0073121  |
| H | -2.8098062 | 1.2043076  | 1.9302292  |
| H | -1.4969443 | 0.0950528  | 2.2815143  |
| H | 0.1473620  | 1.8188391  | 1.4607398  |
| H | -0.9094983 | 2.4918673  | 2.6852477  |
| H | -1.9209464 | -4.4978790 | -0.6091670 |
| H | -3.1301475 | -3.2777569 | -0.1410987 |
| H | -2.1226441 | -3.0211629 | -1.6021949 |
| H | 0.5347595  | -4.3703798 | -0.3061621 |
| H | 1.4546022  | -2.9076971 | 0.1342705  |
| H | 0.5783355  | -2.9726299 | -1.4284737 |
| H | -3.5037800 | -0.9574797 | -0.8237311 |
| H | -3.4025057 | -1.2399106 | 0.9349997  |
| H | -4.1682461 | 0.2303334  | 0.3112039  |

2c\_sy\_c\_2.log

E = -1188.222327

H = -1187.857156

G = -1187.925864

NImag=0

|   |            |            |            |
|---|------------|------------|------------|
| C | -4.1816160 | 2.5443584  | -1.8110642 |
| C | -2.7037216 | 2.3165580  | -1.5722753 |
| C | -4.7795109 | 2.8781080  | -3.0178448 |
| O | -6.0330800 | 3.0544697  | -3.1954512 |
| C | -2.4138388 | 0.9243544  | -0.9097912 |
| C | -2.5329757 | 0.7587330  | 0.5853337  |
| C | -3.6278538 | 1.2295341  | 1.3251857  |
| C | -3.6805195 | 1.0570482  | 2.7017882  |
| C | -2.6281298 | 0.4046386  | 3.3560923  |
| C | -1.5272292 | -0.0709774 | 2.6379242  |
| C | -1.4897398 | 0.1105723  | 1.2597718  |
| C | -3.8855429 | 3.0605865  | -4.2470857 |
| C | -1.9237220 | 2.3136240  | -2.9085443 |
| C | -2.4344181 | 3.3636703  | -3.8874393 |
| S | -3.4310948 | -0.3348683 | -1.8307530 |
| C | -2.5161429 | -1.8499455 | -1.4664975 |
| C | -4.9190078 | -0.6541750 | -0.8649700 |
| C | -2.6803811 | 0.2240673  | 4.7828668  |
| N | -2.7224469 | 0.0776531  | 5.9308548  |
| C | -2.0886127 | 3.3871981  | -0.6483928 |
| H | -4.8415638 | 2.5143143  | -0.9450076 |
| H | -1.3971920 | 0.6169472  | -1.1867259 |
| H | -4.4493193 | 1.7356883  | 0.8320980  |
| H | -4.5290313 | 1.4247635  | 3.2690661  |
| H | -0.7140865 | -0.5722145 | 3.1521027  |
| H | -0.6323306 | -0.2520178 | 0.6992084  |
| H | -3.9352354 | 2.1453890  | -4.8560891 |
| H | -4.3229277 | 3.8628997  | -4.8515633 |
| H | -0.8572594 | 2.4542194  | -2.6911553 |
| H | -2.0186148 | 1.3339151  | -3.3987917 |
| H | -1.8033429 | 3.3733589  | -4.7836007 |

|   |            |            |            |
|---|------------|------------|------------|
| H | -2.3652724 | 4.3628311  | -3.4381067 |
| H | -3.0836855 | -2.6781932 | -1.8953093 |
| H | -1.5422575 | -1.7768590 | -1.9536641 |
| H | -2.4079216 | -1.9795146 | -0.3875357 |
| H | -5.4451469 | -1.4534614 | -1.3923420 |
| H | -5.5210584 | 0.2540267  | -0.8621624 |
| H | -4.6550081 | -0.9724647 | 0.1445658  |
| H | -2.6931765 | 3.5353059  | 0.2511463  |
| H | -1.0687358 | 3.1219686  | -0.3387645 |
| H | -2.0475492 | 4.3417898  | -1.1823775 |

2c\_sy\_c\_2\_r.log

E = -1188.216956

H = -1187.851617

G = -1187.920097

NImag=0

|   |            |            |            |
|---|------------|------------|------------|
| C | 0.9186404  | -1.6983799 | 0.3520834  |
| C | 1.4501230  | -0.6658337 | -0.6190650 |
| C | 1.5919795  | -2.2172778 | 1.4426454  |
| O | 1.1088194  | -3.0406516 | 2.2970032  |
| C | 0.3487728  | 0.4438873  | -0.7506737 |
| C | -0.4042259 | 0.9184970  | 0.4701528  |
| C | 0.2146778  | 1.3177565  | 1.6641850  |
| C | -0.5419880 | 1.7353547  | 2.7501675  |
| C | -1.9393313 | 1.7590923  | 2.6516886  |
| C | -2.5756832 | 1.3682925  | 1.4709629  |
| C | -1.8022086 | 0.9528771  | 0.3920004  |
| C | 3.0464848  | -1.7894042 | 1.6626994  |
| C | 2.8127412  | -0.1040121 | -0.1626126 |
| C | 3.7043489  | -1.1991572 | 0.4186657  |
| S | 0.9836401  | 1.8842263  | -1.7652604 |
| C | -0.5448401 | 2.6417535  | -2.3488906 |
| C | 1.5444850  | 3.1514817  | -0.6123439 |
| C | -2.7248989 | 2.1888770  | 3.7777998  |
| N | -3.3569494 | 2.5362888  | 4.6839473  |
| C | 1.6118756  | -1.2799875 | -2.0268452 |
| H | -0.1089478 | -2.0288745 | 0.1857040  |
| H | -0.3989824 | 0.0505402  | -1.4506188 |
| H | 1.2934209  | 1.3059139  | 1.7628163  |
| H | -0.0571541 | 2.0390147  | 3.6719550  |
| H | -3.6581890 | 1.3855979  | 1.4013402  |
| H | -2.2949297 | 0.6375005  | -0.5237642 |
| H | 3.0700978  | -1.0552944 | 2.4824517  |
| H | 3.5946631  | -2.6693716 | 2.0182577  |
| H | 3.3113132  | 0.3861467  | -1.0109206 |
| H | 2.6871329  | 0.6538785  | 0.6166173  |
| H | 4.6889285  | -0.7825331 | 0.6597860  |
| H | 3.8657818  | -1.9885821 | -0.3260167 |
| H | -0.2636100 | 3.5257958  | -2.9242987 |
| H | -1.0465554 | 1.9197652  | -2.9954471 |
| H | -1.1717540 | 2.9183487  | -1.4990114 |
| H | 1.8406159  | 4.0025753  | -1.2299068 |
| H | 2.4107858  | 2.7725111  | -0.0696546 |
| H | 0.7364311  | 3.4316012  | 0.0648680  |
| H | 0.6844470  | -1.7755100 | -2.3335264 |
| H | 1.8746060  | -0.5365763 | -2.7914224 |
| H | 2.4045721  | -2.0332504 | -2.0110658 |

2c\_sy\_c\_2\_ts1.log

E = -1188.190157

```

H =      -1187.827726
G =      -1187.898392
NImag=1
C      1.6284838      -1.4360164      0.6338362
C      1.3942420      -1.1663351      -0.7263833
C      2.8183266      -1.0598589      1.3201679
O      2.9783649      -1.1808892      2.5530827
C      0.1540009      0.6194420      -0.9599218
C      -1.2042221      0.3409238      -0.5241201
C      -1.5674884      0.2129043      0.8356431
C      -2.8517769      -0.1610321      1.2047761
C      -3.8134470      -0.4307040      0.2217261
C      -3.4735640      -0.3248549      -1.1378889
C      -2.1928654      0.0562692      -1.4956030
C      3.9479630      -0.4836407      0.4772328
C      2.5814035      -0.7448421      -1.6003682
C      3.9271332      -1.0472620      -0.9407576
S      1.0273861      2.0030859      -0.3152553
C      -0.0895463      3.4288377      -0.3752598
C      1.2080627      1.8640410      1.4838194
C      -5.1402386      -0.8149963      0.6025078
N      -6.2146842      -1.1261364      0.9099980
C      0.3906451      -2.0553523      -1.4237621
H      0.8415648      -1.9067122      1.2222572
H      0.2692274      0.7035734      -2.0417176
H      -0.8371331      0.3810101      1.6178120
H      -3.1116441      -0.2556133      2.2546098
H      -4.2187701      -0.5321357      -1.8994694
H      -1.9368698      0.1438576      -2.5479405
H      3.8305558      0.6117609      0.4456342
H      4.8918465      -0.6893900      0.9908527
H      2.5014798      -1.2600247      -2.5645883
H      2.5485248      0.3263788      -1.8254695
H      4.7362544      -0.6187748      -1.5415313
H      4.0892272      -2.1313351      -0.9002990
H      0.4168044      4.2679303      0.1081253
H      -0.2766592      3.6536087      -1.4264106
H      -1.0180588      3.1821851      0.1439872
H      2.0526680      2.4998597      1.7563015
H      1.4204675      0.8273214      1.7421756
H      0.2991641      2.2136675      1.9747679
H      -0.4724290      -2.2723433      -0.7873383
H      0.0397990      -1.6305589      -2.3690726
H      0.8911937      -3.0062599      -1.6497093

```

```

2c_sy_c_2_ts2.log
E =      -1188.206186
H =      -1187.842817
G =      -1187.912587
NImag=1
C      1.7687542      -0.5529476      -1.4892296
C      1.9818232      0.4202628      -0.3486291
C      1.4948208      -1.9166976      -1.3220321
O      1.1555450      -2.7050176      -2.2493610
C      0.5437401      0.8948944      -0.4009434
C      -0.6072781      0.0399722      0.0587286
C      -0.8724247      -0.2265386      1.4086768
C      -1.9625165      -1.0058708      1.7810346
C      -2.8078099      -1.5220310      0.7945847
C      -2.5766330      -1.2429311      -0.5589008
C      -1.4880814      -0.4582655      -0.9122971

```

|   |            |            |            |
|---|------------|------------|------------|
| C | 1.6770485  | -2.4817357 | 0.0839385  |
| C | 2.4251658  | -0.2442309 | 0.9808132  |
| C | 2.7680579  | -1.7288943 | 0.8435485  |
| S | 0.2243325  | 2.7124315  | 0.7840223  |
| C | 0.7828843  | 3.9799877  | -0.3804598 |
| C | -1.5580555 | 2.9235311  | 0.5511858  |
| C | -3.9344077 | -2.3319463 | 1.1736693  |
| N | -4.8420139 | -2.9836342 | 1.4788710  |
| C | 2.9592979  | 1.5283572  | -0.7393079 |
| H | 1.7097162  | -0.1306711 | -2.4911327 |
| H | 0.3204010  | 1.3952645  | -1.3460702 |
| H | -0.2517991 | 0.1913464  | 2.1941994  |
| H | -2.1608234 | -1.2068916 | 2.8285978  |
| H | -3.2443994 | -1.6357044 | -1.3184407 |
| H | -1.3011225 | -0.2417321 | -1.9598677 |
| H | 0.7235149  | -2.4186312 | 0.6294890  |
| H | 1.9205941  | -3.5444158 | -0.0164311 |
| H | 3.2974457  | 0.2970088  | 1.3627601  |
| H | 1.6519716  | -0.1359514 | 1.7439855  |
| H | 2.9170181  | -2.1582166 | 1.8407210  |
| H | 3.7159520  | -1.8407070 | 0.3023454  |
| H | 0.2938081  | 4.9182611  | -0.1107372 |
| H | 1.8615247  | 4.0955833  | -0.2862453 |
| H | 0.5146363  | 3.6955203  | -1.4012411 |
| H | -1.8112442 | 3.9580415  | 0.7918771  |
| H | -2.0810414 | 2.2507990  | 1.2313861  |
| H | -1.8236142 | 2.6991147  | -0.4855296 |
| H | 2.6407653  | 2.0424463  | -1.6531118 |
| H | 3.0788115  | 2.2671666  | 0.0617817  |
| H | 3.9412531  | 1.0795041  | -0.9233821 |

2c\_sy\_c\_3.log

E = -1188.219690

H = -1187.854687

G = -1187.923455

NImag=0

|   |            |            |            |
|---|------------|------------|------------|
| C | -4.2746217 | 2.7084256  | -1.7846520 |
| C | -2.8099555 | 2.6435603  | -1.4246013 |
| C | -4.7849662 | 2.5699153  | -3.0658637 |
| O | -6.0265747 | 2.5616019  | -3.3679746 |
| C | -2.3894870 | 1.2037375  | -0.9189949 |
| C | -2.4664341 | 0.9010767  | 0.5562990  |
| C | -3.6027715 | 1.1956323  | 1.3250616  |
| C | -3.6363736 | 0.9017570  | 2.6810094  |
| C | -2.5219266 | 0.3030502  | 3.2833905  |
| C | -1.3805579 | 0.0018489  | 2.5346695  |
| C | -1.3631507 | 0.3022033  | 1.1766678  |
| C | -3.8183846 | 2.4609553  | -4.2556946 |
| C | -1.9453729 | 3.0029965  | -2.6528388 |
| C | -2.3334717 | 2.2625836  | -3.9288882 |
| S | -3.3538987 | -0.0618006 | -1.8966099 |
| C | -2.3581724 | -1.5409216 | -1.6021265 |
| C | -4.8306397 | -0.5116518 | -0.9686626 |
| C | -2.5533995 | -0.0036520 | 4.6888997  |
| N | -2.5794118 | -0.2510622 | 5.8199813  |
| C | -2.4536248 | 3.6557420  | -0.3222102 |
| H | -4.9910270 | 2.8133751  | -0.9685324 |
| H | -1.3660703 | 0.9825598  | -1.2489135 |
| H | -4.4683375 | 1.6621348  | 0.8654603  |
| H | -4.5156012 | 1.1328999  | 3.2730374  |
| H | -0.5218167 | -0.4602454 | 3.0099473  |

|   |            |            |            |
|---|------------|------------|------------|
| H | -0.4776374 | 0.0718078  | 0.5907049  |
| H | -4.1847806 | 1.6529676  | -4.9004376 |
| H | -3.9481566 | 3.3880478  | -4.8315312 |
| H | -2.0753869 | 4.0786985  | -2.8262715 |
| H | -0.8851746 | 2.8411258  | -2.4176279 |
| H | -2.0953446 | 1.1962013  | -3.8385059 |
| H | -1.7160020 | 2.6277251  | -4.7576563 |
| H | -2.8714033 | -2.3738441 | -2.0865681 |
| H | -1.3838350 | -1.3861668 | -2.0693619 |
| H | -2.2552563 | -1.7269627 | -0.5309025 |
| H | -5.2965487 | -1.3157960 | -1.5432426 |
| H | -5.4859098 | 0.3586612  | -0.9420652 |
| H | -4.5681664 | -0.8618297 | 0.0303641  |
| H | -3.1157308 | 3.5775085  | 0.5435944  |
| H | -1.4199690 | 3.5284088  | 0.0252670  |
| H | -2.5562496 | 4.6668245  | -0.7279201 |

2c\_sy\_c\_3\_r.log

E = -1188.213699

H = -1187.848434

G = -1187.917754

NImag=0

|   |            |            |            |
|---|------------|------------|------------|
| C | 0.2228929  | -2.1499699 | 0.2965529  |
| C | 1.2222182  | -1.1761780 | -0.2937531 |
| C | 0.3087430  | -2.7907955 | 1.5219154  |
| O | -0.4880484 | -3.7001533 | 1.9393007  |
| C | 0.3723823  | 0.0929377  | -0.6696016 |
| C | -0.1501581 | 0.9988364  | 0.4190563  |
| C | 0.6781032  | 1.7987018  | 1.2186317  |
| C | 0.1371124  | 2.6382510  | 2.1846962  |
| C | -1.2503377 | 2.6813096  | 2.3618697  |
| C | -2.0940226 | 1.8900683  | 1.5755300  |
| C | -1.5371005 | 1.0632367  | 0.6072748  |
| C | 1.4580085  | -2.4097452 | 2.4564676  |
| C | 2.3964051  | -0.9174734 | 0.6772889  |
| C | 2.0374235  | -1.0317052 | 2.1588566  |
| S | 1.0785695  | 1.0931257  | -2.1016098 |
| C | -0.1543953 | 2.3922463  | -2.3039125 |
| C | 2.4942727  | 2.0648436  | -1.5567790 |
| C | -1.8131077 | 3.5478400  | 3.3634697  |
| N | -2.2655071 | 4.2463501  | 4.1687791  |
| C | 1.8058360  | -1.7550542 | -1.5995369 |
| H | -0.5842727 | -2.4571015 | -0.3727105 |
| H | -0.4931396 | -0.3061589 | -1.2140530 |
| H | 1.7566880  | 1.7614365  | 1.1164367  |
| H | 0.7841169  | 3.2520045  | 2.8024434  |
| H | -3.1687047 | 1.9274240  | 1.7190495  |
| H | -2.1906074 | 0.4547857  | -0.0113966 |
| H | 1.0808406  | -2.4649006 | 3.4839085  |
| H | 2.2411915  | -3.1772287 | 2.3672422  |
| H | 3.1548730  | -1.6835728 | 0.4669348  |
| H | 2.8773786  | 0.0429280  | 0.4604623  |
| H | 1.3044162  | -0.2712671 | 2.4453577  |
| H | 2.9357008  | -0.8495683 | 2.7611318  |
| H | 0.1584738  | 2.9912290  | -3.1615427 |
| H | -1.1113380 | 1.9116558  | -2.5167921 |
| H | -0.2116191 | 3.0047583  | -1.4024017 |
| H | 2.8169953  | 2.6265988  | -2.4368259 |
| H | 3.2891170  | 1.3845832  | -1.2497661 |
| H | 2.2115094  | 2.7489102  | -0.7567730 |
| H | 1.0299195  | -1.8878827 | -2.3630831 |

|   |           |            |            |
|---|-----------|------------|------------|
| H | 2.6067865 | -1.1321767 | -2.0225434 |
| H | 2.2356256 | -2.7363806 | -1.3813237 |

2c\_sy\_c\_3\_ts1.log

E = -1188.194357  
H = -1187.831674  
G = -1187.901557

NImag=1

|   |            |            |            |
|---|------------|------------|------------|
| C | 2.6064796  | -0.2572632 | 1.0652222  |
| C | 1.4304808  | -0.9558327 | 0.7184772  |
| C | 3.8634994  | -0.4292342 | 0.4204042  |
| O | 4.8959853  | 0.1955118  | 0.7477212  |
| C | 0.2026776  | 0.2642643  | -0.5899101 |
| C | -1.2280053 | 0.1200422  | -0.3939899 |
| C | -1.9890388 | 0.8527260  | 0.5465081  |
| C | -3.3318120 | 0.5832321  | 0.7542072  |
| C | -3.9652276 | -0.4396410 | 0.0322110  |
| C | -3.2331271 | -1.1820681 | -0.9097332 |
| C | -1.8956128 | -0.8984921 | -1.1183674 |
| C | 3.9816204  | -1.5014487 | -0.6568309 |
| C | 1.5835200  | -2.1237152 | -0.2375921 |
| C | 2.6500400  | -1.8778303 | -1.3005820 |
| S | 0.9879360  | 1.8428889  | -0.5450871 |
| C | -0.0635091 | 2.9866283  | -1.4728024 |
| C | 0.8337512  | 2.5586435  | 1.1174617  |
| C | -5.3523990 | -0.7194469 | 0.2495595  |
| N | -6.4767107 | -0.9464117 | 0.4255716  |
| C | 0.4074869  | -1.1858887 | 1.8051481  |
| H | 2.5845795  | 0.4452248  | 1.8970794  |
| H | 0.5495455  | -0.1782490 | -1.5219965 |
| H | -1.5278902 | 1.6340153  | 1.1395824  |
| H | -3.8957606 | 1.1585521  | 1.4819173  |
| H | -3.7220158 | -1.9677215 | -1.4774450 |
| H | -1.3402562 | -1.4688920 | -1.8580709 |
| H | 4.7057602  | -1.1575209 | -1.4021907 |
| H | 4.4233607  | -2.3825898 | -0.1693674 |
| H | 1.8736376  | -2.9935973 | 0.3726387  |
| H | 0.6158711  | -2.3696966 | -0.6892833 |
| H | 2.3313302  | -1.0674432 | -1.9679353 |
| H | 2.7688623  | -2.7692646 | -1.9253535 |
| H | 0.3740431  | 3.9832632  | -1.3806316 |
| H | -0.0520109 | 2.6665327  | -2.5158297 |
| H | -1.0789844 | 2.9723660  | -1.0725123 |
| H | 1.7300743  | 3.1572613  | 1.2867395  |
| H | 0.7799570  | 1.7565419  | 1.8509655  |
| H | -0.0551536 | 3.1886107  | 1.1629232  |
| H | 0.1861870  | -0.2743255 | 2.3692542  |
| H | -0.5289660 | -1.5897596 | 1.4108097  |
| H | 0.8208105  | -1.9190234 | 2.5097243  |

2c\_sy\_c\_3\_ts2.log

E = -1188.204986  
H = -1187.841498  
G = -1187.911301

NImag=1

|   |           |            |            |
|---|-----------|------------|------------|
| C | 2.2944822 | -0.8880720 | -0.9852007 |
| C | 2.0907581 | 0.2931243  | -0.0624451 |
| C | 2.4302373 | -2.2308725 | -0.5956964 |
| O | 2.6572880 | -3.1769627 | -1.4003240 |
| C | 0.7499186 | 0.6406316  | -0.6682233 |

|   |            |            |            |
|---|------------|------------|------------|
| C | -0.5721037 | 0.0196647  | -0.3741980 |
| C | -1.1179517 | -0.0489255 | 0.9164240  |
| C | -2.3968708 | -0.5504368 | 1.1204815  |
| C | -3.1485473 | -0.9883164 | 0.0233148  |
| C | -2.6276621 | -0.9155440 | -1.2739620 |
| C | -1.3510626 | -0.4033186 | -1.4619092 |
| C | 2.3943310  | -2.5624852 | 0.8923298  |
| C | 2.1267103  | -0.1115830 | 1.4213311  |
| C | 1.6432950  | -1.5315896 | 1.7269570  |
| S | 0.3089850  | 2.8364481  | -0.3276253 |
| C | -1.3875401 | 2.9864755  | -0.9250513 |
| C | 0.0496567  | 3.1284489  | 1.4346619  |
| C | -4.4729429 | -1.5101547 | 0.2304109  |
| N | -5.5394607 | -1.9299176 | 0.3970282  |
| C | 3.1105217  | 1.4101081  | -0.3116255 |
| H | 2.4653028  | -0.6604104 | -2.0364901 |
| H | 0.8597370  | 0.8596418  | -1.7305632 |
| H | -0.5490780 | 0.2937235  | 1.7732263  |
| H | -2.8141145 | -0.6007343 | 2.1206711  |
| H | -3.2190890 | -1.2514538 | -2.1191637 |
| H | -0.9452554 | -0.3331344 | -2.4672804 |
| H | 1.9538377  | -3.5584542 | 1.0074995  |
| H | 3.4386111  | -2.6376057 | 1.2284752  |
| H | 3.1787999  | -0.0491889 | 1.7293445  |
| H | 1.5903985  | 0.6309141  | 2.0251411  |
| H | 0.5740653  | -1.6391952 | 1.5301603  |
| H | 1.7852679  | -1.7307184 | 2.7953286  |
| H | -1.7028892 | 4.0269167  | -0.8194460 |
| H | -1.3963858 | 2.7092963  | -1.9812445 |
| H | -2.0508301 | 2.3305036  | -0.3555004 |
| H | -0.2387335 | 4.1739100  | 1.5671599  |
| H | 0.9928116  | 2.9439317  | 1.9522222  |
| H | -0.7356820 | 2.4764011  | 1.8217954  |
| H | 3.0542037  | 1.7780043  | -1.3421969 |
| H | 2.9662632  | 2.2592543  | 0.3693273  |
| H | 4.1163688  | 1.0129354  | -0.1445915 |

2c\_sy\_c\_4.log

E = -1188.221039

H = -1187.855967

G = -1187.924680

NImag=0

|   |            |            |            |
|---|------------|------------|------------|
| C | -4.2089913 | 2.5265541  | -1.7460491 |
| C | -2.7576652 | 2.1579059  | -1.5202897 |
| C | -4.7635687 | 2.9847477  | -2.9315214 |
| O | -5.9960621 | 3.2750775  | -3.1090552 |
| C | -2.6180319 | 0.7168538  | -0.8899545 |
| C | -2.5695735 | 0.6279050  | 0.6204786  |
| C | -3.6645031 | 0.9819460  | 1.4203856  |
| C | -3.5817204 | 0.9023700  | 2.8045386  |
| C | -2.3912715 | 0.4640698  | 3.3977408  |
| C | -1.2911227 | 0.1037956  | 2.6123412  |
| C | -1.3909212 | 0.1840525  | 1.2279433  |
| C | -3.8425778 | 3.1648904  | -4.1422648 |
| C | -1.9652430 | 2.1487731  | -2.8488344 |
| C | -2.3687360 | 3.2959505  | -3.7690161 |
| S | -4.0487836 | -0.3489386 | -1.3856846 |
| C | -3.8997363 | -0.6215508 | -3.1616602 |
| C | -3.4586027 | -1.9601469 | -0.8073100 |
| C | -2.3000636 | 0.3803299  | 4.8314613  |
| N | -2.2262526 | 0.3127932  | 5.9852267  |



|   |            |            |            |
|---|------------|------------|------------|
| C | -2.0639507 | 3.1500521  | -0.5626890 |
| H | -4.8684698 | 2.4910005  | -0.8776354 |
| H | -1.7289935 | 0.2161561  | -1.2918588 |
| H | -4.5895372 | 1.3292088  | 0.9690774  |
| H | -4.4289010 | 1.1783660  | 3.4234418  |
| H | -0.3748760 | -0.2388158 | 3.0817944  |
| H | -0.5426405 | -0.0991495 | 0.6112531  |
| H | -3.9825292 | 2.3075535  | -4.8185241 |
| H | -4.1935087 | 4.0486695  | -4.6868032 |
| H | -0.8934363 | 2.1869083  | -2.6151606 |
| H | -2.1320936 | 1.2110896  | -3.3895189 |
| H | -1.7390924 | 3.2888759  | -4.6663510 |
| H | -2.1984609 | 4.2587501  | -3.2707639 |
| H | -4.6055053 | -1.4213611 | -3.3978085 |
| H | -4.1905763 | 0.2962912  | -3.6709884 |
| H | -2.8810057 | -0.9245232 | -3.4100579 |
| H | -4.1460293 | -2.7100314 | -1.2036325 |
| H | -3.4979658 | -1.9661641 | 0.2825918  |
| H | -2.4425584 | -2.1388059 | -1.1651704 |
| H | -2.6521331 | 3.3088390  | 0.3460708  |
| H | -1.0621258 | 2.8077814  | -0.2706374 |
| H | -1.9619834 | 4.1159305  | -1.0665057 |

2c\_sy\_c\_4\_r.log

E = -1188.215831

H = -1187.850391

G = -1187.919912

NImag=0

|   |            |            |            |
|---|------------|------------|------------|
| C | 0.6136375  | -1.8148424 | 0.2844052  |
| C | 1.3893576  | -0.7530305 | -0.4693949 |
| C | 1.0533037  | -2.5037644 | 1.4016656  |
| O | 0.3827209  | -3.3863406 | 2.0423992  |
| C | 0.3606941  | 0.4061888  | -0.7153445 |
| C | -0.1604668 | 1.1035428  | 0.5218469  |
| C | 0.5796643  | 2.0654743  | 1.2214481  |
| C | 0.0660193  | 2.6639679  | 2.3654663  |
| C | -1.2060437 | 2.2978197  | 2.8187565  |
| C | -1.9661186 | 1.3505052  | 2.1240975  |
| C | -1.4402906 | 0.7676730  | 0.9774887  |
| C | 2.4593195  | -2.2070743 | 1.9355562  |
| C | 2.6103857  | -0.2910690 | 0.3439777  |
| C | 3.3612116  | -1.4814909 | 0.9395312  |
| S | 1.0116488  | 1.7116286  | -1.9059874 |
| C | 0.4982208  | 1.0969165  | -3.5304561 |
| C | -0.2113298 | 3.0390059  | -1.7619042 |
| C | -1.7423487 | 2.9113622  | 4.0044175  |
| N | -2.1745242 | 3.4056287  | 4.9584496  |
| C | 1.8605472  | -1.2891958 | -1.8359635 |
| H | -0.3708723 | -2.0712071 | -0.1117709 |
| H | -0.4899349 | -0.0142576 | -1.2648753 |
| H | 1.5654637  | 2.3693381  | 0.8780363  |
| H | 0.6429150  | 3.4090217  | 2.9028286  |
| H | -2.9558658 | 1.0800489  | 2.4766289  |
| H | -2.0290493 | 0.0372572  | 0.4309133  |
| H | 2.3549434  | -1.6064804 | 2.8512973  |
| H | 2.8985325  | -3.1635912 | 2.2414337  |
| H | 3.2729632  | 0.3195987  | -0.2837998 |
| H | 2.2895390  | 0.3304994  | 1.1854566  |
| H | 4.2748114  | -1.1303124 | 1.4327006  |
| H | 3.6757260  | -2.1716073 | 0.1470551  |
| H | 0.5584868  | 1.9503535  | -4.2085885 |

|   |            |            |            |
|---|------------|------------|------------|
| H | 1.1841754  | 0.3190061  | -3.8562817 |
| H | -0.5264093 | 0.7253176  | -3.4666311 |
| H | -0.0621311 | 3.6838119  | -2.6301390 |
| H | -0.0225323 | 3.6004160  | -0.8485003 |
| H | -1.2153138 | 2.6088956  | -1.7644419 |
| H | 1.0058936  | -1.5716747 | -2.4613612 |
| H | 2.4856101  | -0.5719359 | -2.3859851 |
| H | 2.4644884  | -2.1864418 | -1.6816570 |

2c\_sy\_c\_4\_ts1.log

E = -1188.191200

H = -1187.829008

G = -1187.898661

NImag=1

|   |            |            |            |
|---|------------|------------|------------|
| C | 1.9448247  | -0.8464048 | 1.0556812  |
| C | 1.2973155  | -1.1696943 | -0.1514877 |
| C | 3.3485483  | -0.6204050 | 1.1742067  |
| O | 3.9041579  | -0.2451962 | 2.2277782  |
| C | 0.0312015  | 0.5686427  | -0.7575451 |
| C | -1.3533354 | 0.3140472  | -0.4253121 |
| C | -1.8762367 | 0.4494101  | 0.8843769  |
| C | -3.1833183 | 0.0977799  | 1.1776781  |
| C | -4.0204660 | -0.4043482 | 0.1694605  |
| C | -3.5261262 | -0.5440681 | -1.1402193 |
| C | -2.2222688 | -0.1871184 | -1.4261619 |
| C | 4.2293616  | -0.9551816 | -0.0309318 |
| C | 2.1664732  | -1.2717909 | -1.4003586 |
| C | 3.5339963  | -1.8608446 | -1.0448490 |
| S | 0.7484976  | 1.8802653  | 0.1856511  |
| C | 2.2844232  | 2.2126753  | -0.6886172 |
| C | -0.1718701 | 3.3684867  | -0.2846303 |
| C | -5.3719807 | -0.7652892 | 0.4707460  |
| N | -6.4683334 | -1.0587903 | 0.7137920  |
| C | 0.1642031  | -2.1621502 | -0.0904260 |
| H | 1.3659576  | -0.8275488 | 1.9787765  |
| H | 0.2405915  | 0.6997929  | -1.8200171 |
| H | -1.2488792 | 0.8197187  | 1.6916135  |
| H | -3.5621335 | 0.2063247  | 2.1892972  |
| H | -4.1738183 | -0.9258340 | -1.9234907 |
| H | -1.8477318 | -0.2967574 | -2.4404176 |
| H | 4.5353721  | -0.0173760 | -0.5169020 |
| H | 5.1434509  | -1.4120826 | 0.3620072  |
| H | 1.6539789  | -1.8809672 | -2.1526999 |
| H | 2.3293573  | -0.2856286 | -1.8478265 |
| H | 4.1430601  | -1.9625565 | -1.9494861 |
| H | 3.4072998  | -2.8650656 | -0.6215298 |
| H | 2.6606814  | 3.1672984  | -0.3164512 |
| H | 2.9935325  | 1.4234153  | -0.4515488 |
| H | 2.0858962  | 2.2647732  | -1.7613073 |
| H | 0.3035409  | 4.2233491  | 0.2018150  |
| H | -1.1939155 | 3.2546905  | 0.0809960  |
| H | -0.1587002 | 3.4755274  | -1.3708173 |
| H | -0.4737702 | -2.0074229 | 0.7850603  |
| H | -0.4551363 | -2.1496572 | -0.9910669 |
| H | 0.6130549  | -3.1616458 | -0.0071441 |

2c\_sy\_c\_5.log

E = -1188.218014

H = -1187.852742

G = -1187.921647

NImag=0

|   |            |            |            |
|---|------------|------------|------------|
| C | -4.1932359 | 2.1676978  | -2.7785333 |
| C | -3.6318155 | 2.2058537  | -1.3732456 |
| C | -3.6662752 | 2.7896123  | -3.8980537 |
| O | -4.1578845 | 2.7334005  | -5.0781756 |
| C | -3.3491996 | 0.7431652  | -0.8685192 |
| C | -2.8650201 | 0.6072344  | 0.5558850  |
| C | -1.5091920 | 0.3296160  | 0.7643258  |
| C | -0.9892178 | 0.2367855  | 2.0503996  |
| C | -1.8418936 | 0.4084542  | 3.1453683  |
| C | -3.2045604 | 0.6712330  | 2.9563245  |
| C | -3.7053667 | 0.7727475  | 1.6655577  |
| C | -2.4032524 | 3.6388623  | -3.7237791 |
| C | -2.2491372 | 2.8988053  | -1.3466517 |
| C | -2.1930701 | 4.1001529  | -2.2848659 |
| S | -4.8468072 | -0.3378641 | -1.1649105 |
| C | -4.4145841 | -1.1428730 | -2.7262702 |
| C | -4.6081244 | -1.7584740 | -0.0720750 |
| C | -1.3154091 | 0.3043320  | 4.4803679  |
| N | -0.8910496 | 0.2203470  | 5.5546474  |
| C | -4.6010794 | 2.9450530  | -0.4332367 |
| H | -5.1651009 | 1.6849804  | -2.9074402 |
| H | -2.6034769 | 0.3032917  | -1.5380856 |
| H | -0.8528321 | 0.1870621  | -0.0892310 |
| H | 0.0636798  | 0.0268128  | 2.2062558  |
| H | -3.8596888 | 0.7935127  | 3.8122734  |
| H | -4.7652042 | 0.9738689  | 1.5331463  |
| H | -1.5324111 | 3.0582508  | -4.0622673 |
| H | -2.4936613 | 4.4928125  | -4.4044075 |
| H | -2.0081884 | 3.1893189  | -0.3168488 |
| H | -1.4760661 | 2.1860826  | -1.6674823 |
| H | -1.2279788 | 4.6079262  | -2.1746774 |
| H | -2.9689084 | 4.8273379  | -2.0120079 |
| H | -5.2234644 | -1.8378993 | -2.9596432 |
| H | -4.3372172 | -0.3684692 | -3.4877819 |
| H | -3.4677295 | -1.6713155 | -2.5991902 |
| H | -5.2591201 | -2.5439399 | -0.4620787 |
| H | -4.9201398 | -1.4917743 | 0.9363124  |
| H | -3.5635477 | -2.0752705 | -0.0956347 |
| H | -5.5804883 | 2.4515820  | -0.3977475 |
| H | -4.2192380 | 3.0375546  | 0.5884748  |
| H | -4.7636432 | 3.9538333  | -0.8229981 |

2c\_sy\_c\_5\_ts1.log

E = -1188.192721

H = -1187.830563

G = -1187.900655

NImag=1

|   |            |            |            |
|---|------------|------------|------------|
| C | 2.6445787  | -0.4595541 | 1.0504322  |
| C | 1.3309710  | -0.9499769 | 0.9144561  |
| C | 3.6357905  | -0.6603767 | 0.0503513  |
| O | 4.7523386  | -0.0974905 | 0.0502863  |
| C | 0.2617126  | 0.4764620  | -0.3528368 |
| C | -1.1655048 | 0.2687905  | -0.2840837 |
| C | -1.7807467 | -0.5915721 | -1.2286180 |
| C | -3.1232931 | -0.9145339 | -1.1487048 |
| C | -3.9161344 | -0.3722095 | -0.1232206 |
| C | -3.3368548 | 0.4990791  | 0.8148354  |
| C | -1.9918905 | 0.8101349  | 0.7345292  |
| C | 3.2578826  | -1.5877315 | -1.0937011 |
| C | 1.1055491  | -2.2021107 | 0.0717572  |

|   |            |            |            |
|---|------------|------------|------------|
| C | 2.3789287  | -2.7318481 | -0.5940627 |
| S | 0.8265417  | 2.0543020  | 0.2485594  |
| C | 2.3822439  | 2.3069099  | -0.6340981 |
| C | -0.1642011 | 3.2925111  | -0.6307999 |
| C | -5.3073907 | -0.6950438 | -0.0417588 |
| N | -6.4360812 | -0.9580365 | 0.0240412  |
| C | 0.4369466  | -0.8553389 | 2.1262662  |
| H | 2.8708641  | 0.2429297  | 1.8529329  |
| H | 0.7189794  | 0.2676186  | -1.3202370 |
| H | -1.1840303 | -0.9952382 | -2.0416288 |
| H | -3.5708357 | -1.5749168 | -1.8852050 |
| H | -3.9477471 | 0.9245069  | 1.6050495  |
| H | -1.5720014 | 1.4726324  | 1.4880641  |
| H | 2.7145977  | -0.9949469 | -1.8458308 |
| H | 4.1762405  | -1.9519745 | -1.5634068 |
| H | 0.6921504  | -2.9708184 | 0.7374595  |
| H | 0.3343408  | -2.0207548 | -0.6835173 |
| H | 2.1158046  | -3.4072153 | -1.4145315 |
| H | 2.9543043  | -3.3184675 | 0.1323326  |
| H | 2.5998657  | 3.3748422  | -0.5662584 |
| H | 3.1710357  | 1.7343407  | -0.1497667 |
| H | 2.2504474  | 2.0057481  | -1.6758891 |
| H | 0.2379037  | 4.2749920  | -0.3736744 |
| H | -1.1963077 | 3.2134023  | -0.2880993 |
| H | -0.0950908 | 3.1058198  | -1.7042155 |
| H | 0.4559138  | 0.1426791  | 2.5771960  |
| H | -0.5970471 | -1.1233941 | 1.8959287  |
| H | 0.8041925  | -1.5675504 | 2.8760971  |

2c\_sy\_c\_6.log

E = -1188.211850

H = -1187.846201

G = -1187.914346

NImag=0

|   |            |            |            |
|---|------------|------------|------------|
| C | -4.2921941 | 2.3665606  | -1.7144399 |
| C | -2.8060354 | 2.2809427  | -1.4634580 |
| C | -4.9068628 | 2.5768966  | -2.9336872 |
| O | -6.1662513 | 2.4717540  | -3.1517508 |
| C | -2.3608508 | 0.9054948  | -0.8465517 |
| C | -2.3929198 | 0.7282334  | 0.6627437  |
| C | -3.4954232 | 1.0942020  | 1.4461034  |
| C | -3.4798052 | 0.9061663  | 2.8227067  |
| C | -2.3502514 | 0.3440990  | 3.4281044  |
| C | -1.2402028 | -0.0280031 | 2.6624989  |
| C | -1.2720777 | 0.1659507  | 1.2869602  |
| C | -4.0358093 | 2.9823793  | -4.1251233 |
| C | -2.0007994 | 2.4662857  | -2.7748411 |
| C | -2.6516765 | 3.4771492  | -3.7131805 |
| S | -3.1642726 | -0.6633760 | -1.4746170 |
| C | -4.9382266 | -0.6368152 | -1.1290210 |
| C | -3.2101442 | -0.6372681 | -3.2769514 |
| C | -2.3310997 | 0.1491248  | 4.8538714  |
| N | -2.3156494 | -0.0082732 | 6.0010275  |
| C | -2.3288861 | 3.3734706  | -0.4779296 |
| H | -4.9493395 | 2.1486190  | -0.8736596 |
| H | -1.3265864 | 0.7130118  | -1.1618616 |
| H | -4.3723531 | 1.5408824  | 0.9904026  |
| H | -4.3342824 | 1.1939560  | 3.4259331  |
| H | -0.3673525 | -0.4604596 | 3.1401983  |
| H | -0.4116186 | -0.1200448 | 0.6883555  |
| H | -3.9418471 | 2.1245522  | -4.8086156 |

|   |            |            |            |
|---|------------|------------|------------|
| H | -4.5838619 | 3.7547890  | -4.6773991 |
| H | -0.9785331 | 2.7697059  | -2.5149096 |
| H | -1.9112589 | 1.5177841  | -3.3133155 |
| H | -2.0145798 | 3.6291615  | -4.5921355 |
| H | -2.7416326 | 4.4503462  | -3.2137313 |
| H | -5.2793891 | -1.6500096 | -1.3560892 |
| H | -5.0868428 | -0.4380658 | -0.0672276 |
| H | -5.4308645 | 0.1087506  | -1.7528862 |
| H | -3.7145210 | -1.5646675 | -3.5607140 |
| H | -2.1863712 | -0.6488484 | -3.6523591 |
| H | -3.7694739 | 0.2315463  | -3.6234362 |
| H | -2.9757441 | 3.4412010  | 0.4005529  |
| H | -1.2984711 | 3.2015425  | -0.1387275 |
| H | -2.3622381 | 4.3402732  | -0.9903394 |

2c\_sy\_c\_6\_ts1.log

E = -1188.181433

H = -1187.818969

G = -1187.887990

NImag=1

|   |            |            |            |
|---|------------|------------|------------|
| C | 2.0418390  | -0.5440043 | 1.1961041  |
| C | 1.2427514  | -1.1883509 | 0.2361165  |
| C | 3.4239966  | -0.2676410 | 1.0238101  |
| O | 4.0699455  | 0.5055141  | 1.7690800  |
| C | -0.0037446 | 0.3108731  | -0.7795274 |
| C | -1.4259858 | 0.2051685  | -0.4917799 |
| C | -2.0567255 | 0.9060304  | 0.5608542  |
| C | -3.4003961 | 0.7197531  | 0.8488355  |
| C | -4.1593215 | -0.1865303 | 0.0951380  |
| C | -3.5546549 | -0.8979068 | -0.9573554 |
| C | -2.2173002 | -0.6986540 | -1.2416054 |
| C | 4.1637687  | -1.0024388 | -0.0901181 |
| C | 1.9676071  | -1.7598718 | -0.9832239 |
| C | 3.3832671  | -2.2062383 | -0.6123428 |
| S | 0.5769637  | 2.0002028  | -0.6654478 |
| C | 1.3201492  | 2.4024601  | 0.9523998  |
| C | 2.0667827  | 1.9630866  | -1.6766623 |
| C | -5.5458002 | -0.3848479 | 0.3928169  |
| N | -6.6695702 | -0.5467710 | 0.6325569  |
| C | 0.0966828  | -2.0267412 | 0.7456452  |
| H | 1.5744675  | -0.1777283 | 2.1086384  |
| H | 0.2539154  | -0.0072207 | -1.7890693 |
| H | -1.4935614 | 1.6030430  | 1.1757777  |
| H | -3.8655028 | 1.2699406  | 1.6608427  |
| H | -4.1436789 | -1.5930676 | -1.5475666 |
| H | -1.7575351 | -1.2459174 | -2.0604856 |
| H | 4.3548266  | -0.2961051 | -0.9113289 |
| H | 5.1427536  | -1.2901819 | 0.3078306  |
| H | 1.3829558  | -2.5877069 | -1.3999205 |
| H | 2.0610603  | -1.0078847 | -1.7733144 |
| H | 3.8788324  | -2.6356325 | -1.4897332 |
| H | 3.3427679  | -2.9875985 | 0.1565889  |
| H | 1.3657499  | 3.4938272  | 0.9523992  |
| H | 0.6494643  | 2.0654470  | 1.7428305  |
| H | 2.3124985  | 1.9690917  | 1.0743524  |
| H | 2.5335700  | 2.9468663  | -1.5995990 |
| H | 1.7694385  | 1.7679962  | -2.7079353 |
| H | 2.7373887  | 1.1875949  | -1.3053893 |
| H | -0.4493662 | -1.5258298 | 1.5514709  |
| H | -0.6065409 | -2.3051939 | -0.0421152 |
| H | 0.5237994  | -2.9543541 | 1.1508398  |

2c\_sy\_c\_7.log

E = -1188.213307  
H = -1187.848227  
G = -1187.917057

NImag=0

|   |            |            |            |
|---|------------|------------|------------|
| C | -4.4225073 | 2.1941863  | -2.6257400 |
| C | -3.8876978 | 2.2344407  | -1.2158320 |
| C | -3.7482540 | 2.5887949  | -3.7674016 |
| O | -4.2040999 | 2.4929440  | -4.9600126 |
| C | -3.2756788 | 0.8390016  | -0.7946227 |
| C | -2.7930223 | 0.7024793  | 0.6352860  |
| C | -3.6658015 | 0.4911529  | 1.7102176  |
| C | -3.1807838 | 0.3870805  | 3.0076721  |
| C | -1.8045100 | 0.5016566  | 3.2373278  |
| C | -0.9180065 | 0.7125418  | 2.1755635  |
| C | -1.4190114 | 0.8049339  | 0.8826757  |
| C | -2.3723173 | 3.2491727  | -3.6293186 |
| C | -2.7223630 | 3.2466430  | -1.1371157 |
| C | -1.7053051 | 3.0820305  | -2.2640191 |
| S | -4.2234272 | -0.7152344 | -1.1782190 |
| C | -6.0074766 | -0.4676153 | -1.0604429 |
| C | -4.0142153 | -0.9780761 | -2.9523003 |
| C | -1.2960943 | 0.3966001  | 4.5790236  |
| N | -0.8864561 | 0.3119495  | 5.6590295  |
| C | -4.9685041 | 2.6863073  | -0.2226626 |
| H | -5.4211820 | 1.7834498  | -2.7710686 |
| H | -2.4179876 | 0.6606242  | -1.4514816 |
| H | -4.7373916 | 0.4131225  | 1.5498149  |
| H | -3.8591479 | 0.2204926  | 3.8377340  |
| H | 0.1473791  | 0.7950230  | 2.3631318  |
| H | -0.7350089 | 0.9612633  | 0.0526490  |
| H | -1.7316570 | 2.8589524  | -4.4285656 |
| H | -2.5151743 | 4.3178523  | -3.8460549 |
| H | -3.1738773 | 4.2451353  | -1.2116230 |
| H | -2.2339727 | 3.1948140  | -0.1562626 |
| H | -1.2247417 | 2.0970882  | -2.2030987 |
| H | -0.9008869 | 3.8163232  | -2.1404942 |
| H | -6.4416284 | -1.4141743 | -1.3918216 |
| H | -6.2692860 | -0.2990028 | -0.0160070 |
| H | -6.3361978 | 0.3503776  | -1.6981050 |
| H | -4.4481483 | -1.9582621 | -3.1628295 |
| H | -2.9408520 | -0.9988614 | -3.1502195 |
| H | -4.5005462 | -0.1829503 | -3.5150300 |
| H | -5.8130846 | 1.9926679  | -0.1712247 |
| H | -4.5690752 | 2.8162942  | 0.7889662  |
| H | -5.3584006 | 3.6529808  | -0.5559183 |

2c\_sy\_c\_7\_ts1.log

E = -1188.190960  
H = -1187.828359  
G = -1187.897350

NImag=1

|   |            |            |            |
|---|------------|------------|------------|
| C | 2.7098233  | -0.2350597 | 0.8817092  |
| C | 1.3598487  | -0.6082678 | 1.0190090  |
| C | 3.6674131  | -0.9567432 | 0.1134406  |
| O | 4.8512311  | -0.5816541 | -0.0307705 |
| C | 0.1892029  | 0.4705744  | -0.4721085 |
| C | -1.2429029 | 0.2446021  | -0.3710851 |
| C | -2.0927244 | 1.0644567  | 0.4083898  |

|   |            |            |            |
|---|------------|------------|------------|
| C | -3.4435599 | 0.7872519  | 0.5380037  |
| C | -3.9919048 | -0.3361144 | -0.0995979 |
| C | -3.1683064 | -1.1712902 | -0.8742275 |
| C | -1.8226920 | -0.8796943 | -1.0069836 |
| C | 3.2567082  | -2.2971550 | -0.4857388 |
| C | 0.9883541  | -2.0030373 | 0.5570041  |
| C | 1.7508332  | -2.4518156 | -0.6856764 |
| S | 0.5914035  | 2.2017814  | -0.6673505 |
| C | 1.1801214  | 2.9205296  | 0.8883059  |
| C | 2.1394190  | 2.1268213  | -1.5896968 |
| C | -5.3865214 | -0.6291720 | 0.0374535  |
| N | -6.5169606 | -0.8669502 | 0.1478535  |
| C | 0.6154348  | -0.1651217 | 2.2554375  |
| H | 3.0759266  | 0.6596897  | 1.3805743  |
| H | 0.6596112  | -0.0262815 | -1.3176224 |
| H | -1.6907334 | 1.9263565  | 0.9362472  |
| H | -4.0787624 | 1.4314336  | 1.1380583  |
| H | -3.5943672 | -2.0342695 | -1.3764854 |
| H | -1.1960800 | -1.5180244 | -1.6246474 |
| H | 3.8035928  | -2.4335211 | -1.4240103 |
| H | 3.6216889  | -3.0678988 | 0.2085171  |
| H | 1.2357991  | -2.6754661 | 1.3935167  |
| H | -0.0936565 | -2.0832037 | 0.4142232  |
| H | 1.4355470  | -1.8598195 | -1.5530178 |
| H | 1.5052041  | -3.4939654 | -0.9160437 |
| H | 1.4438856  | 3.9531623  | 0.6482239  |
| H | 0.3530152  | 2.9148418  | 1.5993350  |
| H | 2.0431570  | 2.3822364  | 1.2734495  |
| H | 2.5273039  | 3.1447441  | -1.6597705 |
| H | 1.9082545  | 1.7443039  | -2.5850084 |
| H | 2.8377953  | 1.4706274  | -1.0675532 |
| H | 0.8748889  | 0.8530549  | 2.5529534  |
| H | -0.4689283 | -0.2398402 | 2.1332857  |
| H | 0.9023997  | -0.8320162 | 3.0795647  |

2c\_sy\_c\_8.log

E = -1188.219059

H = -1187.853690

G = -1187.922248

NImag=0

|   |            |            |            |
|---|------------|------------|------------|
| C | -4.1318753 | 2.2280761  | -2.9715328 |
| C | -4.0323360 | 2.2929832  | -1.4622330 |
| C | -3.2032671 | 2.7384458  | -3.8651745 |
| O | -3.3040588 | 2.7076853  | -5.1398600 |
| C | -3.4852704 | 0.9101754  | -0.9270601 |
| C | -2.9732125 | 0.7642808  | 0.4866991  |
| C | -3.7182921 | 1.0847974  | 1.6316004  |
| C | -3.1631791 | 0.9585131  | 2.8986045  |
| C | -1.8453028 | 0.5059040  | 3.0342803  |
| C | -1.0866162 | 0.1758212  | 1.9073690  |
| C | -1.6573978 | 0.3057672  | 0.6467625  |
| C | -1.9605577 | 3.4502162  | -3.3157750 |
| C | -3.0156021 | 3.3711328  | -1.0422333 |
| C | -1.7070133 | 3.2609544  | -1.8201196 |
| S | -4.6787773 | -0.4333204 | -1.4008039 |
| C | -3.5925331 | -1.8706853 | -1.4517526 |
| C | -5.6514358 | -0.8321296 | 0.0652635  |
| C | -1.2678103 | 0.3758382  | 4.3458229  |
| N | -0.8029286 | 0.2703587  | 5.4012301  |
| C | -5.4050841 | 2.6423803  | -0.8698777 |
| H | -5.0292116 | 1.7695055  | -3.3898126 |

|   |            |            |            |
|---|------------|------------|------------|
| H | -2.6605241 | 0.6486826  | -1.5964034 |
| H | -4.7427739 | 1.4271563  | 1.5525409  |
| H | -3.7458689 | 1.2073739  | 3.7792047  |
| H | -0.0667717 | -0.1768651 | 2.0187004  |
| H | -1.0690049 | 0.0508033  | -0.2305372 |
| H | -1.0994863 | 3.1159564  | -3.9061465 |
| H | -2.0865946 | 4.5199110  | -3.5377071 |
| H | -3.4735996 | 4.3470132  | -1.2526776 |
| H | -2.8385027 | 3.3289683  | 0.0393612  |
| H | -1.2438507 | 2.2821809  | -1.6371601 |
| H | -0.9932412 | 4.0092261  | -1.4570168 |
| H | -4.2244526 | -2.7479574 | -1.6017821 |
| H | -2.9186013 | -1.7455526 | -2.3007914 |
| H | -3.0385981 | -1.9505267 | -0.5141089 |
| H | -6.3123661 | -1.6491091 | -0.2327236 |
| H | -6.2468389 | 0.0404765  | 0.3373927  |
| H | -5.0001655 | -1.1442779 | 0.8826427  |
| H | -6.1695353 | 1.9028437  | -1.1410600 |
| H | -5.3913500 | 2.7478444  | 0.2187744  |
| H | -5.7304117 | 3.5988520  | -1.2902994 |

2c\_sy\_c\_8\_ts1.log

E = -1188.191867

H = -1187.829211

G = -1187.898887

NImag=1

|   |            |            |            |
|---|------------|------------|------------|
| C | 3.0405062  | -0.1736112 | 0.5271691  |
| C | 1.7670989  | -0.3961576 | 1.0634185  |
| C | 3.7269600  | -1.1108203 | -0.3049437 |
| O | 4.8576498  | -0.8993608 | -0.7865217 |
| C | 0.3493201  | 0.5913583  | -0.3399572 |
| C | -1.0608146 | 0.2385995  | -0.2560620 |
| C | -1.9230119 | 0.6657036  | 0.7826052  |
| C | -3.2271980 | 0.2054459  | 0.8738184  |
| C | -3.7149142 | -0.7187577 | -0.0620675 |
| C | -2.8757480 | -1.1768551 | -1.0906009 |
| C | -1.5795953 | -0.7005563 | -1.1817464 |
| C | 3.0833542  | -2.4742697 | -0.5325551 |
| C | 1.1741751  | -1.7828927 | 0.9441782  |
| C | 1.5665072  | -2.4776194 | -0.3556668 |
| S | 0.8859556  | 2.2652079  | -0.3962421 |
| C | 0.1417948  | 3.0082512  | -1.8753622 |
| C | 0.0036577  | 3.2401006  | 0.8419040  |
| C | -5.0608288 | -1.1985067 | 0.0358176  |
| N | -6.1513329 | -1.5868697 | 0.1142187  |
| C | 1.3861558  | 0.3418268  | 2.3221899  |
| H | 3.5572626  | 0.7601122  | 0.7443083  |
| H | 0.8550682  | 0.1412546  | -1.1941135 |
| H | -1.5655580 | 1.3433383  | 1.5486001  |
| H | -3.8698100 | 0.5480606  | 1.6789568  |
| H | -3.2505835 | -1.8913604 | -1.8169782 |
| H | -0.9424628 | -1.0472452 | -1.9905889 |
| H | 3.3753393  | -2.8257707 | -1.5270236 |
| H | 3.5439291  | -3.1590893 | 0.1943129  |
| H | 1.5581881  | -2.3641252 | 1.7976899  |
| H | 0.0857722  | -1.7398448 | 1.0626524  |
| H | 1.0990073  | -1.9637298 | -1.2035491 |
| H | 1.1866688  | -3.5047851 | -0.3620494 |
| H | 0.3999898  | 4.0699229  | -1.8907750 |
| H | 0.5728615  | 2.5045837  | -2.7419573 |
| H | -0.9409302 | 2.8692968  | -1.8431395 |



|   |            |            |           |
|---|------------|------------|-----------|
| H | 0.4461917  | 4.2377751  | 0.8033198 |
| H | 0.1647705  | 2.8059070  | 1.8280439 |
| H | -1.0574281 | 3.2901221  | 0.5948261 |
| H | 1.8088487  | 1.3514009  | 2.3412916 |
| H | 0.3019954  | 0.3942205  | 2.4592634 |
| H | 1.8049457  | -0.2005999 | 3.1808110 |

2c\_sy\_c\_prod\_1.log

E = -710.335667  
H = -710.054467  
G = -710.112280

NImag=0

|   |            |            |            |
|---|------------|------------|------------|
| C | -0.9740416 | -0.5445733 | 3.7220209  |
| C | -2.0089369 | -1.2173839 | 2.8384078  |
| C | -1.4481066 | 0.1126167  | 2.4287630  |
| C | -0.5888233 | 0.3396290  | 1.2275889  |
| C | 0.7309222  | 0.7911796  | 1.3392055  |
| C | 1.5060075  | 1.0080888  | 0.2053194  |
| C | 0.9500274  | 0.7786918  | -1.0587670 |
| C | -0.3770301 | 0.3466907  | -1.1892134 |
| C | -1.1362220 | 0.1342367  | -0.0463486 |
| H | -2.1203202 | 0.9484103  | 2.6196412  |
| H | -1.3145461 | -0.0520741 | 4.6291999  |
| C | -3.4367308 | -1.2385524 | 3.3392167  |
| C | -1.5968482 | -2.4881423 | 2.1074230  |
| C | -0.0945442 | -2.6591472 | 1.8606546  |
| C | 0.7219699  | -2.4050544 | 3.1261881  |
| C | 0.3920644  | -1.1276653 | 3.8658855  |
| O | 1.1886872  | -0.6356235 | 4.6513397  |
| C | 1.7458899  | 0.9960593  | -2.2366099 |
| N | 2.3868113  | 1.1711894  | -3.1856843 |
| H | 1.1598183  | 0.9721742  | 2.3204791  |
| H | 2.5313677  | 1.3526522  | 0.2929929  |
| H | -0.7982464 | 0.1786064  | -2.1750716 |
| H | -2.1636069 | -0.2076522 | -0.1378091 |
| H | -4.1338653 | -1.3640763 | 2.5026194  |
| H | -3.5882060 | -2.0707835 | 4.0353320  |
| H | -3.6876343 | -0.3073126 | 3.8561084  |
| H | -1.9467261 | -3.3329007 | 2.7157985  |
| H | -2.1397510 | -2.5417777 | 1.1550669  |
| H | 0.2492084  | -2.0016618 | 1.0581757  |
| H | 0.0907103  | -3.6824684 | 1.5198842  |
| H | 1.7986153  | -2.4265657 | 2.9352214  |
| H | 0.5101866  | -3.1994100 | 3.8585711  |

2c\_sy\_c\_prod\_2.log

E = -710.334844  
H = -710.053541  
G = -710.111145

NImag=0

|   |            |            |            |
|---|------------|------------|------------|
| C | -0.9664839 | -0.5604659 | 3.6818417  |
| C | -2.0147799 | -1.2277268 | 2.7977082  |
| C | -1.4400802 | 0.0968245  | 2.3890743  |
| C | -0.5564369 | 0.3152067  | 1.2025606  |
| C | 0.7367731  | 0.8317440  | 1.3455470  |
| C | 1.5319152  | 1.0833408  | 0.2334933  |
| C | 1.0247473  | 0.8175032  | -1.0440470 |
| C | -0.2710989 | 0.3116247  | -1.2080779 |
| C | -1.0511817 | 0.0670376  | -0.0847545 |
| H | -2.1003419 | 0.9434002  | 2.5751274  |

|   |            |            |            |
|---|------------|------------|------------|
| H | -1.3042448 | -0.0773058 | 4.5945854  |
| C | -3.4327757 | -1.2271558 | 3.3281756  |
| C | -1.6053102 | -2.5054765 | 2.0569019  |
| C | -0.4513466 | -3.2441989 | 2.7328833  |
| C | 0.7508977  | -2.3100628 | 2.9004106  |
| C | 0.3931742  | -1.1564720 | 3.8098236  |
| O | 1.1610879  | -0.7602424 | 4.6748897  |
| C | 1.8410244  | 1.0708157  | -2.2007475 |
| N | 2.4985501  | 1.2748099  | -3.1324545 |
| H | 1.1271949  | 1.0414121  | 2.3376686  |
| H | 2.5346927  | 1.4821300  | 0.3479441  |
| H | -0.6550911 | 0.1145048  | -2.2036329 |
| H | -2.0581895 | -0.3230068 | -0.2051202 |
| H | -4.1498498 | -1.3183953 | 2.5046556  |
| H | -3.5865003 | -2.0728353 | 4.0078314  |
| H | -3.6510450 | -0.3033269 | 3.8728639  |
| H | -2.4814391 | -3.1594434 | 2.0024851  |
| H | -1.3188427 | -2.2776985 | 1.0237647  |
| H | -0.1627596 | -4.1165799 | 2.1386842  |
| H | -0.7685799 | -3.6106988 | 3.7175011  |
| H | 1.0418896  | -1.9112945 | 1.9184876  |
| H | 1.6200304  | -2.8160681 | 3.3284256  |

2c\_sy\_tr\_1.log

E = -1188.223312

H = -1187.858030

G = -1187.926841

NImag=0

|   |            |           |            |
|---|------------|-----------|------------|
| C | -1.1386594 | 1.8516688 | -6.2900687 |
| C | -0.2030682 | 1.6179405 | -5.1295002 |
| C | -2.4834487 | 2.1609969 | -6.2069831 |
| O | -3.1925344 | 2.6155148 | -7.1718026 |
| C | 0.9027288  | 2.7222889 | -5.2292439 |
| C | 1.9891799  | 2.7050025 | -4.1791498 |
| C | 1.7581444  | 3.0339340 | -2.8361552 |
| C | 2.7857666  | 2.9624440 | -1.9041012 |
| C | 4.0599002  | 2.5517119 | -2.3140764 |
| C | 4.3094844  | 2.2255934 | -3.6512536 |
| C | 3.2733748  | 2.3115663 | -4.5735831 |
| C | -3.1865461 | 1.9361073 | -4.8674521 |
| C | -0.9579985 | 1.6777035 | -3.7847521 |
| C | -2.3616776 | 1.0872237 | -3.9034632 |
| S | 0.0778235  | 4.3976838 | -5.2742619 |
| C | 1.5078481  | 5.5008835 | -5.1468646 |
| C | -0.3414824 | 4.7096152 | -7.0086466 |
| C | 5.1260408  | 2.4736131 | -1.3509736 |
| N | 5.9840475  | 2.4112006 | -0.5756611 |
| C | 0.5317243  | 0.2699088 | -5.2539862 |
| H | -0.6593308 | 1.9653212 | -7.2644524 |
| H | 1.3708007  | 2.6428603 | -6.2175563 |
| H | 0.7793071  | 3.3632016 | -2.5017505 |
| H | 2.6057057  | 3.2223092 | -0.8663194 |
| H | 5.3020818  | 1.9160880 | -3.9610396 |
| H | 3.4620790  | 2.0660410 | -5.6147219 |
| H | -3.4040086 | 2.9149224 | -4.4141694 |
| H | -4.1556432 | 1.4698858 | -5.0812541 |
| H | -0.3767047 | 1.1648579 | -3.0095309 |
| H | -1.0806702 | 2.7187128 | -3.4575028 |
| H | -2.8329010 | 1.0529203 | -2.9146969 |
| H | -2.3063997 | 0.0536762 | -4.2691962 |
| H | 1.1454979  | 6.5057347 | -5.3708339 |

|   |            |            |            |
|---|------------|------------|------------|
| H | 1.8926539  | 5.4683698  | -4.1280287 |
| H | 2.2707912  | 5.1965558  | -5.8671375 |
| H | -0.3977321 | 5.7963985  | -7.1090417 |
| H | -1.3066982 | 4.2441325  | -7.2161652 |
| H | 0.4463532  | 4.3057921  | -7.6477779 |
| H | 1.2740598  | 0.1241108  | -4.4601494 |
| H | -0.1994194 | -0.5422985 | -5.1924485 |
| H | 1.0392293  | 0.1933060  | -6.2226479 |

2c\_sy\_tr\_1\_r.log

E = -1188.218497  
H = -1187.853165  
G = -1187.921982

NImag=0

|   |            |            |            |
|---|------------|------------|------------|
| C | 0.9754389  | -1.4866600 | -0.8246636 |
| C | 1.1771483  | -0.8534785 | 0.5384365  |
| C | 0.6721427  | -2.8155881 | -1.0796909 |
| O | 0.5088255  | -3.3260607 | -2.2406429 |
| C | 0.2337845  | 0.3965304  | 0.5683758  |
| C | 0.5122071  | 1.4465433  | -0.4845331 |
| C | 1.6345273  | 2.2839582  | -0.4351872 |
| C | 1.8623851  | 3.2212446  | -1.4349818 |
| C | 0.9587652  | 3.3237370  | -2.4990846 |
| C | -0.1740687 | 2.5048021  | -2.5560730 |
| C | -0.3921593 | 1.5776290  | -1.5437925 |
| C | 0.5220549  | -3.7708961 | 0.1072334  |
| C | 0.7409695  | -1.8238794 | 1.6548807  |
| C | 1.1871195  | -3.2570774 | 1.3793153  |
| S | 0.2351059  | 1.2847417  | 2.2334296  |
| C | -0.7586670 | 2.7545212  | 1.8781306  |
| C | -0.9861593 | 0.3905526  | 3.2259274  |
| C | 1.1925132  | 4.2891063  | -3.5403291 |
| N | 1.3800393  | 5.0659202  | -4.3784928 |
| C | 2.6495166  | -0.4565157 | 0.7556468  |
| H | 1.1475422  | -0.8456072 | -1.6895048 |
| H | -0.8006251 | 0.0510518  | 0.4684727  |
| H | 2.3383674  | 2.2231706  | 0.3900381  |
| H | 2.7310464  | 3.8696933  | -1.3936459 |
| H | -0.8738056 | 2.5980636  | -3.3798555 |
| H | -1.2717475 | 0.9416037  | -1.5790212 |
| H | -0.5503325 | -3.9388365 | 0.2853339  |
| H | 0.9425060  | -4.7360535 | -0.1967352 |
| H | 1.1472681  | -1.4856429 | 2.6181014  |
| H | -0.3550964 | -1.8245914 | 1.7349347  |
| H | 0.9320997  | -3.8908490 | 2.2362764  |
| H | 2.2781117  | -3.2964848 | 1.2689437  |
| H | -1.0102846 | 3.1957296  | 2.8443534  |
| H | -0.1574771 | 3.4534626  | 1.2978234  |
| H | -1.6609535 | 2.4610325  | 1.3370039  |
| H | -1.2880572 | 1.0790778  | 4.0178320  |
| H | -0.5185141 | -0.4888426 | 3.6624436  |
| H | -1.8402327 | 0.1231317  | 2.6008812  |
| H | 2.8023491  | 0.1627054  | 1.6503408  |
| H | 3.2436381  | -1.3670044 | 0.8777544  |
| H | 3.0508253  | 0.0763013  | -0.1103840 |

2c\_sy\_tr\_1\_ts1.log

E = -1188.193159  
H = -1187.830829  
G = -1187.900369

NImag=1

|   |            |            |            |
|---|------------|------------|------------|
| C | 2.6578216  | -0.7384592 | 0.9189161  |
| C | 1.3085412  | -1.1229872 | 0.8385784  |
| C | 3.5505185  | -0.7377682 | -0.1898390 |
| O | 4.6781873  | -0.1972272 | -0.1644255 |
| C | 0.1448561  | 0.7459886  | 0.7597877  |
| C | -1.2272019 | 0.4790096  | 0.4076926  |
| C | -1.6992539 | 0.3577331  | -0.9251992 |
| C | -3.0079699 | -0.0013183 | -1.1985371 |
| C | -3.9061470 | -0.2496264 | -0.1491229 |
| C | -3.4697884 | -0.1201591 | 1.1823796  |
| C | -2.1638114 | 0.2412549  | 1.4488211  |
| C | 3.1088647  | -1.4758533 | -1.4488322 |
| C | 0.8502484  | -1.7996413 | -0.4474359 |
| C | 2.0112981  | -2.4964490 | -1.1587670 |
| S | 1.0776814  | 1.6877857  | -0.4211329 |
| C | 0.1188447  | 3.2002750  | -0.7117691 |
| C | 2.4093310  | 2.4169092  | 0.5604029  |
| C | -5.2593699 | -0.6160145 | -0.4320188 |
| N | -6.3578925 | -0.9141636 | -0.6601854 |
| C | 0.6440241  | -1.6038848 | 2.1040434  |
| H | 3.0314635  | -0.3281574 | 1.8565219  |
| H | 0.3143714  | 1.1249117  | 1.7672316  |
| H | -1.0374896 | 0.5456736  | -1.7673787 |
| H | -3.3429418 | -0.0883992 | -2.2275379 |
| H | -4.1654388 | -0.2944838 | 1.9975304  |
| H | -1.8406685 | 0.3518858  | 2.4801889  |
| H | 2.7441022  | -0.7341011 | -2.1743667 |
| H | 3.9978683  | -1.9403477 | -1.8875967 |
| H | 0.0399189  | -2.5019080 | -0.2217940 |
| H | 0.4354021  | -1.0645509 | -1.1467961 |
| H | 1.6551742  | -2.9545887 | -2.0874756 |
| H | 2.4101956  | -3.3000925 | -0.5275234 |
| H | 0.7146706  | 3.8433640  | -1.3630161 |
| H | -0.8118930 | 2.9289983  | -1.2107437 |
| H | -0.0801903 | 3.6840405  | 0.2462185  |
| H | 2.7714651  | 3.2744503  | -0.0107562 |
| H | 3.2052693  | 1.6834317  | 0.6764361  |
| H | 2.0058764  | 2.7369714  | 1.5231647  |
| H | -0.4461660 | -1.6032353 | 2.0289042  |
| H | 0.9602834  | -2.6420395 | 2.2758982  |
| H | 0.9487409  | -1.0102910 | 2.9710381  |

2c\_sy\_tr\_1\_ts2.log

E = -1188.209239

H = -1187.845795

G = -1187.915302

NImag=1

|   |            |            |            |
|---|------------|------------|------------|
| C | -1.4886532 | -1.5810999 | 0.2087178  |
| C | -1.5875648 | -0.1697932 | 0.7461466  |
| C | -2.4927488 | -2.2509035 | -0.5128283 |
| O | -2.3692195 | -3.4157495 | -0.9829932 |
| C | -0.5032653 | 0.3389871  | -0.1634799 |
| C | 0.9300801  | -0.0706513 | -0.0515820 |
| C | 1.6685982  | 0.0773423  | 1.1311957  |
| C | 3.0132034  | -0.2713511 | 1.1719401  |
| C | 3.6314952  | -0.7690017 | 0.0191472  |
| C | 2.9131533  | -0.9067457 | -1.1750685 |
| C | 1.5719589  | -0.5499113 | -1.2019077 |
| C | -3.8463390 | -1.5592640 | -0.6698975 |
| C | -2.9317753 | 0.4940387  | 0.3798620  |

|   |            |            |            |
|---|------------|------------|------------|
| C | -4.0846337 | -0.5031631 | 0.4067736  |
| S | -0.2199510 | 2.5574660  | 0.1488426  |
| C | 1.1646456  | 2.8424137  | -0.9795678 |
| C | -1.5380758 | 3.2807692  | -0.8567877 |
| C | 5.0230737  | -1.1317209 | 0.0584269  |
| N | 6.1433745  | -1.4238844 | 0.0891274  |
| C | -1.3368673 | -0.0782501 | 2.2521534  |
| H | -0.5962226 | -2.1470620 | 0.4659712  |
| H | -0.8338641 | 0.4438348  | -1.1977112 |
| H | 1.2104035  | 0.4929194  | 2.0218400  |
| H | 3.5843212  | -0.1522395 | 2.0865946  |
| H | 3.4033744  | -1.2853830 | -2.0657683 |
| H | 1.0064879  | -0.6513630 | -2.1238796 |
| H | -3.8972426 | -1.0920575 | -1.6638990 |
| H | -4.6110582 | -2.3426479 | -0.6472708 |
| H | -3.1116391 | 1.3342059  | 1.0621944  |
| H | -2.8813347 | 0.9061036  | -0.6355514 |
| H | -5.0329388 | 0.0178217  | 0.2363773  |
| H | -4.1512443 | -0.9831217 | 1.3918541  |
| H | 1.2505734  | 3.9175562  | -1.1507032 |
| H | 2.0767859  | 2.4740557  | -0.5076210 |
| H | 0.9890206  | 2.3211183  | -1.9244737 |
| H | -1.2586050 | 4.3103612  | -1.0909633 |
| H | -2.4589493 | 3.2781365  | -0.2739476 |
| H | -1.6668278 | 2.7073881  | -1.7780928 |
| H | -1.1292192 | 0.9490684  | 2.5764878  |
| H | -2.2383900 | -0.4215870 | 2.7711612  |
| H | -0.5135883 | -0.7241447 | 2.5667397  |

2c\_sy\_tr\_2.log

E = -1188.222035

H = -1187.856691

G = -1187.925091

NImag=0

|   |            |           |            |
|---|------------|-----------|------------|
| C | -1.1651012 | 1.7514989 | -6.3525524 |
| C | -0.1229524 | 1.4383450 | -5.3135524 |
| C | -2.4420562 | 2.2175129 | -6.0942817 |
| O | -3.2416613 | 2.6735313 | -6.9838432 |
| C | 0.8892169  | 2.6492755 | -5.2773387 |
| C | 1.9239012  | 2.6543557 | -4.1786900 |
| C | 1.6118328  | 2.9597251 | -2.8465373 |
| C | 2.5903675  | 2.9185743 | -1.8624503 |
| C | 3.8986517  | 2.5584526 | -2.2090178 |
| C | 4.2287066  | 2.2530513 | -3.5335074 |
| C | 3.2399319  | 2.3114341 | -4.5090269 |
| C | -2.9761452 | 2.1698449 | -4.6580173 |
| C | -0.7892953 | 1.1076029 | -3.9680456 |
| C | -1.9074317 | 2.0685678 | -3.5662906 |
| S | -0.0269486 | 4.2786373 | -5.3114896 |
| C | 1.3384390  | 5.4474700 | -5.0845834 |
| C | -0.3644480 | 4.6147347 | -7.0591109 |
| C | 4.9148026  | 2.5083744 | -1.1915416 |
| N | 5.7324724  | 2.4679913 | -0.3723742 |
| C | 0.7379215  | 0.2324605 | -5.7310497 |
| H | -0.8144970 | 1.7984614 | -7.3857885 |
| H | 1.4077392  | 2.6561432 | -6.2431847 |
| H | 0.6021289  | 3.2445627 | -2.5627223 |
| H | 2.3466911  | 3.1606757 | -0.8334210 |
| H | 5.2464134  | 1.9814878 | -3.7933770 |
| H | 3.4913315  | 2.0842286 | -5.5412087 |
| H | -3.6003486 | 3.0580898 | -4.5077705 |

|   |            |            |            |
|---|------------|------------|------------|
| H | -3.6524574 | 1.3049426  | -4.5979900 |
| H | -1.2255808 | 0.1066305  | -4.0846966 |
| H | -0.0386514 | 1.0233960  | -3.1740608 |
| H | -1.5011617 | 3.0644754  | -3.3556558 |
| H | -2.3579511 | 1.7251097  | -2.6278544 |
| H | 0.9363725  | 6.4383565  | -5.3035511 |
| H | 1.6733708  | 5.4096028  | -4.0485230 |
| H | 2.1518758  | 5.2009993  | -5.7712550 |
| H | -0.4190399 | 5.7023813  | -7.1495466 |
| H | -1.3197483 | 4.1522673  | -7.3131022 |
| H | 0.4524966  | 4.2203522  | -7.6668613 |
| H | 1.5156896  | 0.0073277  | -4.9910775 |
| H | 0.0965959  | -0.6484657 | -5.8310486 |
| H | 1.2232269  | 0.4110346  | -6.6975033 |

2c\_sy\_tr\_2\_r.log

E = -1188.219126

H = -1187.853986

G = -1187.922576

NImag=0

|   |            |            |            |
|---|------------|------------|------------|
| C | 1.0572847  | -1.7584130 | -0.4603702 |
| C | 1.2528550  | -0.9606569 | 0.8099553  |
| C | 0.3053128  | -2.9168997 | -0.5846552 |
| O | 0.1585755  | -3.5902607 | -1.6610291 |
| C | 0.3011177  | 0.2879252  | 0.6935589  |
| C | 0.6077126  | 1.2120801  | -0.4633083 |
| C | 1.7046265  | 2.0835846  | -0.4642621 |
| C | 1.9650760  | 2.8944718  | -1.5617724 |
| C | 1.1211562  | 2.8316833  | -2.6769628 |
| C | 0.0153695  | 1.9750920  | -2.6887930 |
| C | -0.2368765 | 1.1779809  | -1.5783799 |
| C | -0.3804977 | -3.4936130 | 0.6602261  |
| C | 0.8718566  | -1.8203218 | 2.0270016  |
| C | -0.4639916 | -2.5362680 | 1.8489319  |
| S | 0.2460547  | 1.3195446  | 2.2782637  |
| C | -0.5427252 | 2.8638665  | 1.7602015  |
| C | -1.1643884 | 0.6124137  | 3.1654236  |
| C | 1.3881120  | 3.6652722  | -3.8189630 |
| N | 1.6029145  | 4.3365720  | -4.7379071 |
| C | 2.7188215  | -0.5313426 | 0.9601931  |
| H | 1.5405883  | -1.3720322 | -1.3586759 |
| H | -0.7316757 | -0.0591845 | 0.5977218  |
| H | 2.3644757  | 2.1495789  | 0.3969532  |
| H | 2.8132871  | 3.5706958  | -1.5576363 |
| H | -0.6379038 | 1.9396233  | -3.5542284 |
| H | -1.0972673 | 0.5154099  | -1.5780261 |
| H | -1.3780944 | -3.8334103 | 0.3596939  |
| H | 0.1790691  | -4.3957240 | 0.9467962  |
| H | 1.6565207  | -2.5801362 | 2.1356283  |
| H | 0.9086890  | -1.2303390 | 2.9526668  |
| H | -1.2741133 | -1.8147860 | 1.6841376  |
| H | -0.7206813 | -3.0812767 | 2.7648051  |
| H | -0.8712693 | 3.3600412  | 2.6756997  |
| H | 0.1927555  | 3.4830796  | 1.2487031  |
| H | -1.3931074 | 2.6397403  | 1.1126008  |
| H | -1.3945116 | 1.3062497  | 3.9763518  |
| H | -0.8837158 | -0.3539137 | 3.5805735  |
| H | -2.0101227 | 0.5225026  | 2.4807526  |
| H | 2.8770095  | 0.1502713  | 1.8068666  |
| H | 3.3262942  | -1.4248468 | 1.1331346  |
| H | 3.0961438  | -0.0504500 | 0.0537270  |

2c\_sy\_tr\_2\_ts1.log

E = -1188.196459

H = -1187.834061

G = -1187.904147

NImag=1

|   |            |            |            |
|---|------------|------------|------------|
| C | 2.7186593  | -0.8072860 | 0.8217754  |
| C | 1.3575021  | -1.0885986 | 1.0341801  |
| C | 3.4035135  | -1.0553190 | -0.3990333 |
| O | 4.5856511  | -0.6999034 | -0.6056493 |
| C | 0.2453334  | 0.7780155  | 0.7452710  |
| C | -1.1341398 | 0.5197970  | 0.3937059  |
| C | -1.6038765 | 0.3826016  | -0.9376388 |
| C | -2.9110958 | 0.0186397  | -1.2090428 |
| C | -3.8104838 | -0.2195425 | -0.1575632 |
| C | -3.3788955 | -0.0639409 | 1.1713252  |
| C | -2.0734423 | 0.3062772  | 1.4351701  |
| C | 2.6826465  | -1.8608715 | -1.4744606 |
| C | 0.6755631  | -2.0021298 | 0.0401853  |
| C | 1.1593934  | -1.7772891 | -1.3886902 |
| S | 1.1507584  | 1.7186126  | -0.4642075 |
| C | 0.2632461  | 3.2964598  | -0.5724304 |
| C | 2.6181438  | 2.2998564  | 0.4188955  |
| C | -5.1615831 | -0.5971185 | -0.4377203 |
| N | -6.2578228 | -0.9044166 | -0.6640192 |
| C | 0.8953642  | -1.2617981 | 2.4604521  |
| H | 3.2775299  | -0.2998667 | 1.6069652  |
| H | 0.3966232  | 1.2172518  | 1.7318796  |
| H | -0.9402122 | 0.5605742  | -1.7798760 |
| H | -3.2441423 | -0.0820296 | -2.2374338 |
| H | -4.0769337 | -0.2226745 | 1.9876302  |
| H | -1.7585049 | 0.4450029  | 2.4653237  |
| H | 3.0477897  | -1.5297746 | -2.4517457 |
| H | 3.0050106  | -2.9049774 | -1.3507405 |
| H | 0.9165865  | -3.0311101 | 0.3502091  |
| H | -0.4127337 | -1.9046287 | 0.1128582  |
| H | 0.8342367  | -0.7893185 | -1.7327421 |
| H | 0.7000873  | -2.5095000 | -2.0613126 |
| H | 0.8248236  | 3.9482555  | -1.2451868 |
| H | -0.7269216 | 3.0997134  | -0.9856291 |
| H | 0.1886630  | 3.7299579  | 0.4269138  |
| H | 2.8991165  | 3.2436360  | -0.0532093 |
| H | 3.4148895  | 1.5683960  | 0.2995369  |
| H | 2.3673056  | 2.4542946  | 1.4703786  |
| H | -0.1935532 | -1.2190034 | 2.5494741  |
| H | 1.2166412  | -2.2529079 | 2.8065699  |
| H | 1.3411821  | -0.5133436 | 3.1218614  |

2c\_sy\_tr\_2\_ts1\_rot1.log

E = -1188.197381

H = -1187.835245

G = -1187.904938

NImag=1

|   |            |            |            |
|---|------------|------------|------------|
| C | 0.2607323  | -1.8158340 | -0.8657203 |
| C | 1.3819531  | -0.9606843 | -0.8878214 |
| C | 0.1445644  | -2.9796737 | -0.0575453 |
| O | -0.8473325 | -3.7423991 | -0.0770222 |
| C | 0.9209551  | 0.7381618  | 0.3309574  |
| C | -0.5304260 | 0.8104304  | 0.2635271  |
| C | -1.2368424 | 1.5328804  | -0.7229926 |

|   |            |            |            |
|---|------------|------------|------------|
| C | -2.6155885 | 1.4422181  | -0.8304425 |
| C | -3.3332969 | 0.6168831  | 0.0493421  |
| C | -2.6532775 | -0.1147943 | 1.0339582  |
| C | -1.2748509 | -0.0159733 | 1.1332190  |
| C | 1.3356319  | -3.3767060 | 0.8083979  |
| C | 2.6265639  | -1.4614431 | -0.1772079 |
| C | 2.2940423  | -2.2262372 | 1.1005354  |
| S | 1.6964615  | 2.2624108  | -0.1517038 |
| C | 1.3275721  | 3.4366088  | 1.1812016  |
| C | 3.4447693  | 1.9937186  | 0.1908808  |
| C | -4.7595666 | 0.5245622  | -0.0573162 |
| N | -5.9139671 | 0.4503563  | -0.1436827 |
| C | 1.6285497  | -0.2229786 | -2.1853852 |
| H | -0.5862846 | -1.5893698 | -1.5138570 |
| H | 1.3089400  | 0.4409086  | 1.3065903  |
| H | -0.7066432 | 2.1700964  | -1.4258387 |
| H | -3.1421897 | 2.0055096  | -1.5944222 |
| H | -3.2082317 | -0.7538961 | 1.7138413  |
| H | -0.7525616 | -0.5819798 | 1.8996438  |
| H | 0.9499384  | -3.8247606 | 1.7299913  |
| H | 1.8639104  | -4.1745090 | 0.2664593  |
| H | 3.1479620  | -2.1330374 | -0.8780222 |
| H | 3.3134279  | -0.6370836 | 0.0300487  |
| H | 1.8335067  | -1.5436534 | 1.8256332  |
| H | 3.2124791  | -2.6044807 | 1.5619532  |
| H | 1.8717721  | 4.3618599  | 0.9784463  |
| H | 0.2524559  | 3.6226197  | 1.1625377  |
| H | 1.6312078  | 2.9997941  | 2.1348011  |
| H | 3.9146897  | 2.9790876  | 0.2054776  |
| H | 3.8760174  | 1.3966363  | -0.6116686 |
| H | 3.5540331  | 1.5000595  | 1.1589379  |
| H | 2.4634832  | 0.4818433  | -2.1202041 |
| H | 1.8811408  | -0.9516454 | -2.9661949 |
| H | 0.7318630  | 0.3141917  | -2.5142954 |

2c\_sy\_tr\_2\_ts2.log

E = -1188.212485

H = -1187.848748

G = -1187.917664

NImag=1

|   |            |            |            |
|---|------------|------------|------------|
| C | -1.4290446 | -1.7127128 | 0.5314322  |
| C | -1.5738915 | -0.2864595 | 1.0130178  |
| C | -2.3133761 | -2.3591245 | -0.3445303 |
| O | -2.1712665 | -3.5493886 | -0.7454672 |
| C | -0.6043775 | 0.2678077  | -0.0036729 |
| C | 0.8588643  | -0.0541738 | 0.0315374  |
| C | 1.6747921  | 0.2625029  | 1.1266455  |
| C | 3.0367948  | -0.0116435 | 1.0972249  |
| C | 3.5957881  | -0.6025320 | -0.0416314 |
| C | 2.7997802  | -0.9064886 | -1.1526875 |
| C | 1.4413834  | -0.6230257 | -1.1093276 |
| C | -3.5835602 | -1.6288046 | -0.7875231 |
| C | -3.0003644 | 0.2347279  | 0.7991074  |
| C | -3.5781953 | -0.1148638 | -0.5710684 |
| S | -0.5270561 | 2.4819910  | 0.1201094  |
| C | 0.9364629  | 2.8692795  | -0.8708856 |
| C | -1.7854364 | 2.9320841  | -1.0993006 |
| C | 5.0052255  | -0.8881016 | -0.0764519 |
| N | 6.1401022  | -1.1176565 | -0.1047688 |
| C | -1.1741091 | -0.1163255 | 2.4772648  |
| H | -0.5589987 | -2.2674354 | 0.8772893  |



|   |            |            |            |
|---|------------|------------|------------|
| H | -0.9956959 | 0.2577873  | -1.0203234 |
| H | 1.2609730  | 0.7538155  | 2.0007824  |
| H | 3.6659163  | 0.2380673  | 1.9450674  |
| H | 3.2437857  | -1.3554307 | -2.0348701 |
| H | 0.8164118  | -0.8546053 | -1.9671853 |
| H | -3.7588471 | -1.8737409 | -1.8405948 |
| H | -4.4096793 | -2.0838654 | -0.2229598 |
| H | -3.6258814 | -0.2327169 | 1.5706621  |
| H | -3.0372676 | 1.3162065  | 0.9873166  |
| H | -3.0064051 | 0.3701293  | -1.3704665 |
| H | -4.5972572 | 0.2801624  | -0.6476530 |
| H | 0.9019415  | 3.9312918  | -1.1232786 |
| H | 1.8253205  | 2.6638193  | -0.2731886 |
| H | 0.9407222  | 2.2631539  | -1.7806002 |
| H | -1.6470652 | 3.9850981  | -1.3536553 |
| H | -2.7723551 | 2.7949147  | -0.6569646 |
| H | -1.6761222 | 2.3115185  | -1.9920780 |
| H | -1.0632436 | 0.9395473  | 2.7538576  |
| H | -1.9604039 | -0.5509616 | 3.1027969  |
| H | -0.2449295 | -0.6413491 | 2.7109347  |

2c\_sy\_tr\_3.log

E = -1188.219683

H = -1187.854931

G = -1187.924555

NImag=0

|   |            |            |            |
|---|------------|------------|------------|
| C | -1.3599904 | 2.6487584  | -5.2505666 |
| C | -0.2489905 | 1.8786158  | -5.9290679 |
| C | -2.2151880 | 2.1691296  | -4.2754010 |
| O | -3.1210946 | 2.8480729  | -3.6771168 |
| C | 1.1331728  | 2.6111174  | -5.8414879 |
| C | 1.8624339  | 2.6513436  | -4.5224922 |
| C | 1.2300721  | 2.9926362  | -3.3167954 |
| C | 1.9411924  | 2.9932606  | -2.1243139 |
| C | 3.3011986  | 2.6572399  | -2.1301522 |
| C | 3.9477096  | 2.3165465  | -3.3219661 |
| C | 3.2219532  | 2.3150429  | -4.5083983 |
| C | -2.0818529 | 0.6993462  | -3.8640722 |
| C | -0.0478631 | 0.4855629  | -5.2885309 |
| C | -1.3793510 | -0.1591059 | -4.9125872 |
| S | 0.9534876  | 4.3307741  | -6.5600024 |
| C | 0.8311863  | 5.4837488  | -5.1794962 |
| C | 2.6374718  | 4.6700756  | -7.1051846 |
| C | 4.0406061  | 2.6610636  | -0.8957486 |
| N | 4.6357367  | 2.6646543  | 0.0977709  |
| C | -0.5574094 | 1.6842181  | -7.4303007 |
| H | -1.5269764 | 3.6752394  | -5.5881901 |
| H | 1.8055198  | 2.1623538  | -6.5834163 |
| H | 0.1748121  | 3.2453235  | -3.3175742 |
| H | 1.4505202  | 3.2528875  | -1.1921127 |
| H | 5.0002789  | 2.0539129  | -3.3166789 |
| H | 3.7171248  | 2.0402550  | -5.4356821 |
| H | -1.5303924 | 0.6518829  | -2.9125034 |
| H | -3.0918464 | 0.3273179  | -3.6580410 |
| H | 0.5229893  | -0.1471230 | -5.9803166 |
| H | 0.5429856  | 0.5696865  | -4.3693249 |
| H | -1.2024406 | -1.1714063 | -4.5311742 |
| H | -2.0193427 | -0.2598125 | -5.7984526 |
| H | 0.7667680  | 6.4762010  | -5.6314658 |
| H | -0.0845076 | 5.2651297  | -4.6291486 |
| H | 1.7129896  | 5.4057464  | -4.5420865 |

|   |            |           |            |
|---|------------|-----------|------------|
| H | 2.6596013  | 5.7048616 | -7.4524883 |
| H | 2.8611732  | 3.9936536 | -7.9315528 |
| H | 3.3335665  | 4.5273320 | -6.2758755 |
| H | 0.2896889  | 1.2422924 | -7.9710774 |
| H | -1.4187252 | 1.0183334 | -7.5382200 |
| H | -0.8232683 | 2.6299310 | -7.9147078 |

2c\_sy\_tr\_3\_r.log

E = -1188.217718  
H = -1187.852375  
G = -1187.921956

NImag=0

|   |            |            |            |
|---|------------|------------|------------|
| C | -1.4374711 | -1.2152127 | -0.2229172 |
| C | -1.8942649 | 0.1646311  | -0.6548730 |
| C | -1.5979315 | -2.3977099 | -0.9288692 |
| O | -1.1725757 | -3.5450083 | -0.5570431 |
| C | -0.6110997 | 1.0568018  | -0.6326739 |
| C | 0.2322318  | 1.1122718  | 0.6182751  |
| C | -0.2610706 | 1.5136047  | 1.8680679  |
| C | 0.5614601  | 1.5144862  | 2.9881117  |
| C | 1.8961521  | 1.1122796  | 2.8648614  |
| C | 2.4090259  | 0.7140494  | 1.6263569  |
| C | 1.5740415  | 0.7201022  | 0.5156271  |
| C | -2.3525696 | -2.3524220 | -2.2600638 |
| C | -2.4176716 | 0.1415336  | -2.1106233 |
| C | -3.2303088 | -1.1148570 | -2.4093809 |
| S | -0.9583047 | 2.7844455  | -1.3088173 |
| C | -1.1464966 | 3.9287500  | 0.0728055  |
| C | 0.6821017  | 3.2644333  | -1.8844000 |
| C | 2.7499061  | 1.1121584  | 4.0234890  |
| N | 3.4374381  | 1.1134089  | 4.9553318  |
| C | -3.0085682 | 0.7034849  | 0.2613847  |
| H | -0.9509137 | -1.2811482 | 0.7510083  |
| H | 0.0248268  | 0.6841837  | -1.4427809 |
| H | -1.2876282 | 1.8396634  | 1.9849673  |
| H | 0.1742286  | 1.8259272  | 3.9523571  |
| H | 3.4444677  | 0.4026791  | 1.5382760  |
| H | 1.9678338  | 0.4043169  | -0.4463588 |
| H | -1.6190480 | -2.3936274 | -3.0787589 |
| H | -2.9471281 | -3.2705209 | -2.3277866 |
| H | -3.0228410 | 1.0364283  | -2.3005410 |
| H | -1.5702466 | 0.1696073  | -2.8116153 |
| H | -3.6456437 | -1.0501152 | -3.4215962 |
| H | -4.0826995 | -1.1810182 | -1.7209854 |
| H | -1.2639341 | 4.9157954  | -0.3803310 |
| H | -2.0502315 | 3.6701550  | 0.6253757  |
| H | -0.2627774 | 3.9023349  | 0.7115114  |
| H | 0.6142722  | 4.3007819  | -2.2208355 |
| H | 0.9423336  | 2.6158228  | -2.7222405 |
| H | 1.4034219  | 3.1692757  | -1.0700216 |
| H | -3.2319611 | 1.7664411  | 0.0927762  |
| H | -3.9281904 | 0.1453186  | 0.0593517  |
| H | -2.7736971 | 0.5565191  | 1.3180299  |

2c\_sy\_tr\_3\_ts1.log

E = -1188.194255  
H = -1187.831773  
G = -1187.901401

NImag=1

|   |            |            |           |
|---|------------|------------|-----------|
| C | -1.1715070 | -1.6896985 | 0.9264466 |
|---|------------|------------|-----------|

|   |            |            |            |
|---|------------|------------|------------|
| C | -1.6413814 | -1.3838028 | -0.3667261 |
| C | 0.1259216  | -2.2084567 | 1.2040779  |
| O | 0.5641133  | -2.4086489 | 2.3576642  |
| C | -1.2509204 | 0.6629861  | -0.8225181 |
| C | 0.1614954  | 0.8678329  | -0.5457119 |
| C | 0.6783882  | 0.8848586  | 0.7671163  |
| C | 2.0466106  | 0.9293913  | 0.9980430  |
| C | 2.9363987  | 0.9445642  | -0.0838133 |
| C | 2.4472111  | 0.9318014  | -1.4009299 |
| C | 1.0808694  | 0.8969237  | -1.6187394 |
| C | 0.9818384  | -2.5972790 | 0.0048595  |
| C | -0.8819612 | -1.9856067 | -1.5567930 |
| C | 0.1032175  | -3.0813480 | -1.1468562 |
| S | -2.4521185 | 1.7379081  | -0.1025256 |
| C | -2.5787289 | 1.4784144  | 1.6836794  |
| C | -1.7484031 | 3.4074368  | -0.0877012 |
| C | 4.3506663  | 0.9811987  | 0.1533940  |
| N | 5.4942993  | 1.0108513  | 0.3434654  |
| C | -3.1451545 | -1.3481349 | -0.5629031 |
| H | -1.8040742 | -1.4802113 | 1.7875148  |
| H | -1.5045864 | 0.6640450  | -1.8836831 |
| H | 0.0109675  | 0.8373070  | 1.6189215  |
| H | 2.4303000  | 0.9349015  | 2.0134801  |
| H | 3.1391489  | 0.9551397  | -2.2369175 |
| H | 0.7029348  | 0.8945712  | -2.6375757 |
| H | 1.5690089  | -1.7218213 | -0.3110988 |
| H | 1.6885096  | -3.3666608 | 0.3308966  |
| H | -1.6164253 | -2.3821417 | -2.2680453 |
| H | -0.3202897 | -1.2169407 | -2.0964743 |
| H | 0.7144414  | -3.3647076 | -2.0107354 |
| H | -0.4434643 | -3.9775546 | -0.8279566 |
| H | -3.4651568 | 2.0333824  | 1.9986885  |
| H | -2.7210310 | 0.4174795  | 1.8810107  |
| H | -1.6967718 | 1.8628537  | 2.1958375  |
| H | -2.4680022 | 4.0658557  | 0.4046323  |
| H | -1.6079594 | 3.7108839  | -1.1263223 |
| H | -0.7978587 | 3.4009444  | 0.4493216  |
| H | -3.4285539 | -0.8338819 | -1.4866342 |
| H | -3.5072068 | -2.3821614 | -0.6349434 |
| H | -3.6648722 | -0.8819958 | 0.2804071  |

2c\_sy\_tr\_3\_ts2.log

E = -1188.209102

H = -1187.845682

G = -1187.916115

NImag=1

|   |            |            |            |
|---|------------|------------|------------|
| C | -1.7076400 | -1.4635428 | 0.3404124  |
| C | -1.7030080 | 0.0042434  | 0.7101128  |
| C | -2.7165954 | -2.1183007 | -0.3846497 |
| O | -2.6687888 | -3.3313134 | -0.7337076 |
| C | -0.5597230 | 0.3381608  | -0.2084016 |
| C | 0.8432958  | -0.1391214 | -0.0813383 |
| C | 1.5286189  | -0.2255482 | 1.1408263  |
| C | 2.8504328  | -0.6479097 | 1.1827225  |
| C | 3.5092542  | -0.9783520 | -0.0078986 |
| C | 2.8498567  | -0.8823150 | -1.2385190 |
| C | 1.5265031  | -0.4627298 | -1.2648884 |
| C | -3.9857045 | -1.3319693 | -0.7108215 |
| C | -2.9721193 | 0.7401439  | 0.2166725  |
| C | -4.2010976 | -0.1607225 | 0.2442656  |
| S | -0.3020140 | 2.5804762  | -0.1397633 |

|   |            |            |            |
|---|------------|------------|------------|
| C | 1.2849130  | 2.9120987  | 0.6535954  |
| C | 0.1624165  | 2.8315282  | -1.8657919 |
| C | 4.8797891  | -1.4131668 | 0.0342732  |
| N | 5.9835328  | -1.7624770 | 0.0681840  |
| C | -1.5075524 | 0.2589660  | 2.2074768  |
| H | -0.8724652 | -2.0631413 | 0.6963615  |
| H | -0.8821782 | 0.3671417  | -1.2491922 |
| H | 1.0465297  | 0.0593913  | 2.0672520  |
| H | 3.3757807  | -0.7132134 | 2.1296691  |
| H | 3.3681984  | -1.1376358 | -2.1567492 |
| H | 1.0056153  | -0.3985905 | -2.2161695 |
| H | -3.9212063 | -0.9601771 | -1.7436827 |
| H | -4.8202596 | -2.0402057 | -0.6793239 |
| H | -3.1230734 | 1.6358405  | 0.8299287  |
| H | -2.8330564 | 1.0823061  | -0.8180650 |
| H | -5.0900480 | 0.4134883  | -0.0385153 |
| H | -4.3699394 | -0.5377570 | 1.2616264  |
| H | 1.5039628  | 3.9769598  | 0.5458112  |
| H | 1.1945633  | 2.6640408  | 1.7128959  |
| H | 2.0731278  | 2.3151278  | 0.1886863  |
| H | 0.4755791  | 3.8686529  | -2.0014751 |
| H | -0.7160485 | 2.6305574  | -2.4818022 |
| H | 0.9776343  | 2.1546283  | -2.1355707 |
| H | -1.1623766 | 1.2810833  | 2.4126314  |
| H | -2.4733800 | 0.1260080  | 2.7071526  |
| H | -0.8119906 | -0.4500029 | 2.6608230  |

2c\_sy\_tr\_4.log

E = -1188.215193

H = -1187.849446

G = -1187.917227

NImag=0

|   |            |           |            |
|---|------------|-----------|------------|
| C | -1.0828181 | 1.9762565 | -6.3060038 |
| C | -0.1220773 | 1.7298038 | -5.1680496 |
| C | -2.4445603 | 2.1780297 | -6.2019487 |
| O | -3.2243274 | 2.5076086 | -7.1651496 |
| C | 1.0743986  | 2.7381369 | -5.2875762 |
| C | 2.1327599  | 2.6631134 | -4.2059797 |
| C | 3.3360572  | 2.0094768 | -4.4968512 |
| C | 4.3296284  | 1.8812530 | -3.5342382 |
| C | 4.1214426  | 2.4266015 | -2.2623785 |
| C | 2.9304915  | 3.0958594 | -1.9581894 |
| C | 1.9436666  | 3.2086593 | -2.9299767 |
| C | -3.0937417 | 1.9917163 | -4.8271165 |
| C | -0.8207780 | 1.8082109 | -3.7950049 |
| C | -2.2239313 | 1.2055149 | -3.8489471 |
| S | 0.7071198  | 4.5511582 | -5.5395131 |
| C | 0.1919405  | 4.7224720 | -7.2627685 |
| C | -0.8197655 | 5.0497821 | -4.7152727 |
| C | 5.1446546  | 2.3052319 | -1.2581386 |
| N | 5.9682982  | 2.2069391 | -0.4499145 |
| C | 0.5346730  | 0.3365323 | -5.3111683 |
| H | -0.6348575 | 2.0459376 | -7.2988530 |
| H | 1.5607208  | 2.5306064 | -6.2493835 |
| H | 3.4937658  | 1.5927446 | -5.4877190 |
| H | 5.2591693  | 1.3709548 | -3.7639319 |
| H | 2.7816768  | 3.5214720 | -0.9715102 |
| H | 1.0251845  | 3.7299133 | -2.6753683 |
| H | -3.3290338 | 2.9825829 | -4.4083265 |
| H | -4.0555894 | 1.4913126 | -4.9889875 |
| H | -0.2069227 | 1.2980077 | -3.0429969 |

|   |            |            |            |
|---|------------|------------|------------|
| H | -0.9238088 | 2.8462540  | -3.4631930 |
| H | -2.6651529 | 1.2131785  | -2.8456244 |
| H | -2.1703784 | 0.1556324  | -4.1639010 |
| H | 0.2138925  | 5.7941106  | -7.4734787 |
| H | 0.9253793  | 4.2084104  | -7.8862789 |
| H | -0.8053888 | 4.3032454  | -7.3931387 |
| H | -0.9905318 | 6.0751994  | -5.0530385 |
| H | -0.6634983 | 5.0462955  | -3.6365943 |
| H | -1.6365617 | 4.3969548  | -5.0211712 |
| H | 1.2844289  | 0.1393760  | -4.5359763 |
| H | -0.2432620 | -0.4288568 | -5.2347264 |
| H | 1.0109367  | 0.2319115  | -6.2927157 |

2c\_sy\_tr\_4\_r.log

E = -1188.211473  
H = -1187.845816  
G = -1187.913923

NImag=0

|   |            |            |            |
|---|------------|------------|------------|
| C | 1.0381197  | -1.3445429 | -0.7513091 |
| C | 1.1911768  | -0.7463756 | 0.6355276  |
| C | 0.7325783  | -2.6632627 | -1.0535420 |
| O | 0.5816468  | -3.1338200 | -2.2329268 |
| C | 0.2008294  | 0.4685210  | 0.6587455  |
| C | 0.4827578  | 1.5726012  | -0.3413471 |
| C | -0.3397882 | 1.6787859  | -1.4687406 |
| C | -0.1132165 | 2.6592348  | -2.4269273 |
| C | 0.9455068  | 3.5566135  | -2.2485968 |
| C | 1.7691227  | 3.4746207  | -1.1203925 |
| C | 1.5337735  | 2.4830701  | -0.1753486 |
| C | 0.5822435  | -3.6597692 | 0.0987405  |
| C | 0.7479322  | -1.7625217 | 1.7065198  |
| C | 1.2271639  | -3.1770613 | 1.3930459  |
| S | -0.2035690 | 1.3851767  | 2.2679271  |
| C | -1.3273511 | 0.3056952  | 3.1822159  |
| C | 1.1958558  | 1.4424976  | 3.4070971  |
| C | 1.1863047  | 4.5791357  | -3.2319105 |
| N | 1.3802131  | 5.4023953  | -4.0230304 |
| C | 2.6495223  | -0.3145680 | 0.8711917  |
| H | 1.2225686  | -0.6762762 | -1.5926119 |
| H | -0.7972844 | 0.0650127  | 0.4544648  |
| H | -1.1621914 | 0.9817755  | -1.5998015 |
| H | -0.7495161 | 2.7340012  | -3.3024672 |
| H | 2.5839596  | 4.1785503  | -0.9882717 |
| H | 2.1869069  | 2.4296234  | 0.6904411  |
| H | -0.4891949 | -3.8483166 | 0.2614561  |
| H | 1.0188544  | -4.6082456 | -0.2339452 |
| H | 1.1109907  | -1.4495547 | 2.6931559  |
| H | -0.3494209 | -1.7905570 | 1.7493157  |
| H | 0.9752413  | -3.8427807 | 2.2264206  |
| H | 2.3198550  | -3.1927765 | 1.2926021  |
| H | -1.7698063 | 0.9268031  | 3.9636845  |
| H | -2.1053447 | -0.0289982 | 2.4938545  |
| H | -0.7898162 | -0.5355623 | 3.6168657  |
| H | 0.8019320  | 1.9214148  | 4.3071609  |
| H | 1.9773843  | 2.0686814  | 2.9769968  |
| H | 1.5590790  | 0.4415618  | 3.6354732  |
| H | 2.7952129  | 0.2798671  | 1.7790915  |
| H | 3.2690640  | -1.2124144 | 0.9580925  |
| H | 3.0299592  | 0.2575184  | 0.0200936  |

2c\_sy\_tr\_4\_ts1.log

E = -1188.186984  
H = -1187.824695  
G = -1187.894064

NImag=1

|   |            |            |            |
|---|------------|------------|------------|
| C | 2.6296902  | -0.5166932 | 0.9088032  |
| C | 1.2701509  | -0.8663672 | 0.9822706  |
| C | 3.4898141  | -0.9011180 | -0.1562247 |
| O | 4.6462979  | -0.4502811 | -0.3095607 |
| C | 0.0749041  | 0.9462989  | 0.6756573  |
| C | -1.3028639 | 0.6157613  | 0.3613712  |
| C | -2.2414377 | 0.3953569  | 1.3991223  |
| C | -3.5374377 | -0.0045467 | 1.1285815  |
| C | -3.9516799 | -0.1883280 | -0.2022760 |
| C | -3.0466076 | 0.0380748  | -1.2504641 |
| C | -1.7473625 | 0.4261765  | -0.9695251 |
| C | 2.9810102  | -1.9464658 | -1.1419879 |
| C | 0.7216031  | -1.7707306 | -0.1134554 |
| C | 1.7969123  | -2.7433253 | -0.6008866 |
| S | 0.7493536  | 2.1570846  | -0.4423083 |
| C | 1.9260364  | 3.0377490  | 0.5998084  |
| C | 1.8971651  | 1.4148494  | -1.6457943 |
| C | -5.2937755 | -0.5958091 | -0.4881096 |
| N | -6.3821596 | -0.9259414 | -0.7189226 |
| C | 0.6953238  | -1.1026666 | 2.3590816  |
| H | 3.0677440  | 0.0822202  | 1.7064468  |
| H | 0.2490174  | 1.3174940  | 1.6840257  |
| H | -1.9409408 | 0.5639668  | 2.4292039  |
| H | -4.2424845 | -0.1604861 | 1.9393210  |
| H | -3.3653935 | -0.0987240 | -2.2791333 |
| H | -1.0627377 | 0.5749226  | -1.8019246 |
| H | 2.6881189  | -1.4239884 | -2.0652207 |
| H | 3.8279552  | -2.5907915 | -1.3996473 |
| H | -0.1630104 | -2.3023172 | 0.2553034  |
| H | 0.3943817  | -1.1782026 | -0.9751293 |
| H | 1.3846147  | -3.3959712 | -1.3777949 |
| H | 2.1251682  | -3.3854601 | 0.2259525  |
| H | 2.4720251  | 3.7329025  | -0.0410293 |
| H | 1.3594457  | 3.5858834  | 1.3535031  |
| H | 2.6028632  | 2.3164753  | 1.0608951  |
| H | 2.0040954  | 2.1698690  | -2.4276019 |
| H | 1.4258555  | 0.5237875  | -2.0628263 |
| H | 2.8613983  | 1.1881163  | -1.1937614 |
| H | -0.3965733 | -1.0775498 | 2.3731393  |
| H | 1.0021215  | -2.1093527 | 2.6749814  |
| H | 1.0866099  | -0.3878813 | 3.0891178  |

2c\_sy\_tr\_5.log

E = -1188.218650  
H = -1187.853628  
G = -1187.922762

NImag=0

|   |            |           |            |
|---|------------|-----------|------------|
| C | -1.4201185 | 2.5655740 | -5.3740472 |
| C | -0.2810150 | 1.9051232 | -6.1052017 |
| C | -2.0365962 | 2.1016761 | -4.2265593 |
| O | -2.9942718 | 2.6866492 | -3.6110927 |
| C | 1.0830880  | 2.6738176 | -5.9454950 |
| C | 1.7608958  | 2.6730284 | -4.6013917 |
| C | 1.1446066  | 3.1468548 | -3.4321567 |
| C | 1.7990044  | 3.0702245 | -2.2098046 |
| C | 3.0827657  | 2.5137962 | -2.1465485 |

|   |            |            |            |
|---|------------|------------|------------|
| C | 3.7137989  | 2.0402540  | -3.3013258 |
| C | 3.0494088  | 2.1301536  | -4.5194203 |
| C | -1.6012282 | 0.7512271  | -3.6446389 |
| C | -0.0615918 | 0.4500292  | -5.6264821 |
| C | -0.2525308 | 0.2151169  | -4.1284038 |
| S | 0.9065482  | 4.4027533  | -6.6333020 |
| C | 0.5348367  | 5.5447894  | -5.2891721 |
| C | 2.6322327  | 4.8314454  | -6.9319601 |
| C | 3.7607797  | 2.4314158  | -0.8798525 |
| N | 4.3068803  | 2.3654722  | 0.1393136  |
| C | -0.5773856 | 1.8380087  | -7.6180424 |
| H | -1.7963427 | 3.5009328  | -5.7981347 |
| H | 1.7892776  | 2.2627878  | -6.6787099 |
| H | 0.1374880  | 3.5445097  | -3.4711716 |
| H | 1.3187129  | 3.4312805  | -1.3063214 |
| H | 4.7085392  | 1.6112706  | -3.2438113 |
| H | 3.5347857  | 1.7621035  | -5.4190132 |
| H | -1.6074786 | 0.8481995  | -2.5523660 |
| H | -2.3984872 | 0.0347376  | -3.8908266 |
| H | -0.7978497 | -0.1660998 | -6.1588385 |
| H | 0.9293190  | 0.1007393  | -5.9490750 |
| H | 0.5588671  | 0.6752493  | -3.5585152 |
| H | -0.1876794 | -0.8622075 | -3.9333301 |
| H | 0.4989852  | 6.5326006  | -5.7550924 |
| H | -0.4439062 | 5.2909797  | -4.8815139 |
| H | 1.3158746  | 5.5082770  | -4.5290753 |
| H | 2.6529847  | 5.8744152  | -7.2536412 |
| H | 3.0025880  | 4.1869238  | -7.7305375 |
| H | 3.2108306  | 4.6984455  | -6.0152721 |
| H | 0.2636419  | 1.4083474  | -8.1780503 |
| H | -1.4562425 | 1.2071558  | -7.7785874 |
| H | -0.8056164 | 2.8214421  | -8.0415327 |

2c\_sy\_tr\_5\_r.log

E = -1188.218691

H = -1187.853694

G = -1187.922493

NImag=0

|   |            |            |            |
|---|------------|------------|------------|
| C | -2.9388519 | -0.1076130 | -1.4140488 |
| C | -1.7050504 | -0.5553178 | -0.6623371 |
| C | -4.1769183 | 0.1885144  | -0.8651308 |
| O | -5.2175897 | 0.5238166  | -1.5288477 |
| C | -0.7103245 | 0.6602004  | -0.6085064 |
| C | -0.5651518 | 1.5699233  | -1.8050984 |
| C | -0.3300757 | 1.1018625  | -3.1058578 |
| C | -0.1997782 | 1.9886180  | -4.1662263 |
| C | -0.3005049 | 3.3656464  | -3.9314238 |
| C | -0.5325487 | 3.8530147  | -2.6420072 |
| C | -0.6617061 | 2.9511763  | -1.5917319 |
| C | -4.3553079 | 0.0793058  | 0.6518428  |
| C | -2.0684248 | -0.9281123 | 0.7908960  |
| C | -3.0459692 | 0.0511558  | 1.4342916  |
| S | 0.9779144  | 0.1252618  | 0.0257662  |
| C | 2.0059013  | -0.2049156 | -1.4181619 |
| C | 1.6949937  | 1.6816526  | 0.5858546  |
| C | -0.1628534 | 4.2870366  | -5.0279281 |
| N | -0.0502340 | 5.0291675  | -5.9098714 |
| C | -1.0795516 | -1.7986723 | -1.3190420 |
| H | -2.8440793 | -0.0271793 | -2.4974648 |
| H | -1.0236164 | 1.2871563  | 0.2333726  |
| H | -0.2486916 | 0.0402861  | -3.3068782 |

|   |            |            |            |
|---|------------|------------|------------|
| H | -0.0219502 | 1.6205900  | -5.1711600 |
| H | -0.6123822 | 4.9207649  | -2.4672137 |
| H | -0.8492129 | 3.3263892  | -0.5892696 |
| H | -4.9881420 | 0.9151059  | 0.9714144  |
| H | -4.9293879 | -0.8375228 | 0.8507776  |
| H | -2.5341400 | -1.9222181 | 0.7683273  |
| H | -1.1580420 | -1.0267371 | 1.3977436  |
| H | -2.6136519 | 1.0602224  | 1.4631922  |
| H | -3.2238970 | -0.2365749 | 2.4767660  |
| H | 2.9775914  | -0.5194061 | -1.0308791 |
| H | 1.5539018  | -1.0182751 | -1.9872475 |
| H | 2.1058691  | 0.6972909  | -2.0230570 |
| H | 2.7062358  | 1.4605304  | 0.9331610  |
| H | 1.0879761  | 2.0473603  | 1.4158417  |
| H | 1.7192187  | 2.4005349  | -0.2354477 |
| H | -0.2088518 | -2.1754078 | -0.7640873 |
| H | -1.8269038 | -2.5977240 | -1.3235001 |
| H | -0.7808056 | -1.6284508 | -2.3567472 |

2c\_sy\_tr\_5\_ts1.log

E = -1188.194165

H = -1187.831598

G = -1187.901154

NImag=1

|   |            |            |            |
|---|------------|------------|------------|
| C | -1.6609014 | -1.5534397 | 0.6923286  |
| C | -1.8286660 | -1.0861464 | -0.6208707 |
| C | -0.6758780 | -2.5016310 | 1.1010902  |
| O | -0.5498688 | -2.8885054 | 2.2823333  |
| C | -1.0331876 | 0.9281584  | -0.8328420 |
| C | 0.3802142  | 0.8960907  | -0.4977358 |
| C | 0.8441654  | 0.6442076  | 0.8115140  |
| C | 2.1980247  | 0.4804745  | 1.0712915  |
| C | 3.1259381  | 0.5662120  | 0.0247395  |
| C | 2.6889609  | 0.8318024  | -1.2852589 |
| C | 1.3380274  | 0.9961004  | -1.5328968 |
| C | 0.1674989  | -3.1689925 | 0.0240875  |
| C | -1.0007206 | -1.7539504 | -1.7078887 |
| C | 0.3375164  | -2.3175551 | -1.2291136 |
| S | -2.0771433 | 2.1015685  | -0.0269420 |
| C | -2.5101591 | 1.5872646  | 1.6529422  |
| C | -1.0569769 | 3.5403885  | 0.3875348  |
| C | 4.5239545  | 0.3938595  | 0.2930426  |
| N | 5.6551769  | 0.2544955  | 0.5081138  |
| C | -3.2296391 | -0.7284004 | -1.0759350 |
| H | -2.3474800 | -1.2245119 | 1.4695738  |
| H | -1.2289605 | 1.0892711  | -1.8932609 |
| H | 0.1430105  | 0.5448177  | 1.6318284  |
| H | 2.5402501  | 0.2761178  | 2.0811195  |
| H | 3.4117740  | 0.9107911  | -2.0913338 |
| H | 1.0000033  | 1.1970585  | -2.5459533 |
| H | 1.1349570  | -3.4374574 | 0.4603114  |
| H | -0.3428682 | -4.1108794 | -0.2253686 |
| H | -1.6175316 | -2.5826637 | -2.0903640 |
| H | -0.8558793 | -1.0675293 | -2.5501461 |
| H | 1.0350296  | -1.5051299 | -1.0121343 |
| H | 0.7865163  | -2.9124641 | -2.0322207 |
| H | -3.0394021 | 2.4412544  | 2.0825115  |
| H | -3.1845671 | 0.7349013  | 1.6003230  |
| H | -1.6257789 | 1.3590118  | 2.2461811  |
| H | -1.7040162 | 4.2730030  | 0.8745010  |
| H | -0.6687950 | 3.9435758  | -0.5490780 |



|   |            |            |            |
|---|------------|------------|------------|
| H | -0.2417441 | 3.2433603  | 1.0499846  |
| H | -3.2273955 | -0.1222858 | -1.9871908 |
| H | -3.7666515 | -1.6607310 | -1.2951239 |
| H | -3.7993958 | -0.2073479 | -0.3006584 |

2c\_sy\_tr\_prod\_1.log

E = -710.339129  
H = -710.057779  
G = -710.116305

NImag=0

|   |            |            |            |
|---|------------|------------|------------|
| C | 0.6586037  | -1.9309460 | 0.7731920  |
| C | 0.6158423  | -1.7602452 | -0.7310123 |
| C | 0.7446415  | -0.5453023 | 0.1470149  |
| C | -0.3750511 | 0.4340905  | 0.2859702  |
| C | -1.2825344 | 0.4068597  | 1.3497881  |
| C | -2.3092876 | 1.3420171  | 1.4336628  |
| C | -2.4317250 | 2.3198786  | 0.4406362  |
| C | -1.5281111 | 2.3659903  | -0.6300801 |
| C | -0.5095077 | 1.4259415  | -0.6974709 |
| H | 1.7245609  | -0.0741375 | 0.1632746  |
| H | -0.2724604 | -2.1684181 | 1.2813195  |
| C | -0.7026800 | -2.0231965 | -1.4224343 |
| C | 1.8388952  | -2.2012691 | -1.5189923 |
| C | 3.1525607  | -2.0599328 | -0.7493286 |
| C | 3.0914010  | -2.7804453 | 0.5983666  |
| C | 1.8654443  | -2.4903676 | 1.4406866  |
| O | 1.8417938  | -2.7762832 | 2.6283616  |
| C | -3.4918967 | 3.2878184  | 0.5196757  |
| N | -4.3461702 | 4.0679665  | 0.5825271  |
| H | -1.1881126 | -0.3458414 | 2.1260998  |
| H | -3.0102823 | 1.3187352  | 2.2617589  |
| H | -1.6309211 | 3.1283504  | -1.3955054 |
| H | 0.1927911  | 1.4541685  | -1.5263408 |
| H | -0.7925264 | -3.0869370 | -1.6671807 |
| H | -1.5541427 | -1.7444237 | -0.7949253 |
| H | -0.7661440 | -1.4530094 | -2.3568314 |
| H | 1.6974943  | -3.2555033 | -1.7942302 |
| H | 1.8850178  | -1.6296150 | -2.4541145 |
| H | 3.4000120  | -1.0033998 | -0.6025048 |
| H | 3.9670635  | -2.4846943 | -1.3434358 |
| H | 3.9797993  | -2.5930192 | 1.2080792  |
| H | 3.0502321  | -3.8661299 | 0.4245737  |

2c\_sy\_tr\_prod\_2.log

E = -710.337435  
H = -710.055899  
G = -710.114187

NImag=0

|   |            |            |            |
|---|------------|------------|------------|
| C | 0.5871785  | -1.9905241 | 0.7114159  |
| C | 0.6749412  | -1.6991220 | -0.7815204 |
| C | 0.7441769  | -0.5662526 | 0.2034292  |
| C | -0.3594600 | 0.4315993  | 0.3351057  |
| C | -0.3886064 | 1.5071754  | -0.5653622 |
| C | -1.3874617 | 2.4682350  | -0.4981660 |
| C | -2.3781746 | 2.3572962  | 0.4872720  |
| C | -2.3620075 | 1.2944604  | 1.3970161  |
| C | -1.3531557 | 0.3398819  | 1.3149866  |
| H | 1.7364255  | -0.1324518 | 0.3179777  |
| H | -0.3881564 | -2.2613151 | 1.1068589  |
| C | -0.5963501 | -1.8861718 | -1.5803222 |

|   |            |            |            |
|---|------------|------------|------------|
| C | 1.9699609  | -2.0676440 | -1.5155774 |
| C | 2.8363351  | -3.0717689 | -0.7541021 |
| C | 3.0554332  | -2.6267706 | 0.6982403  |
| C | 1.7297597  | -2.6186350 | 1.4223311  |
| O | 1.5800612  | -3.1437949 | 2.5159521  |
| C | -3.4186206 | 3.3466082  | 0.5645421  |
| N | -4.2566915 | 4.1442238  | 0.6259532  |
| H | 0.3812540  | 1.5856059  | -1.3283699 |
| H | -1.4083096 | 3.2967359  | -1.1987298 |
| H | -3.1302340 | 1.2212199  | 2.1599526  |
| H | -1.3400221 | -0.4793320 | 2.0270127  |
| H | -0.6807270 | -2.9257653 | -1.9142522 |
| H | -1.4859591 | -1.6421747 | -0.9923698 |
| H | -0.5869054 | -1.2439599 | -2.4689528 |
| H | 1.7077165  | -2.4846754 | -2.4934247 |
| H | 2.5531234  | -1.1578049 | -1.7031023 |
| H | 3.8017130  | -3.1890272 | -1.2556504 |
| H | 2.3494813  | -4.0553555 | -0.7551740 |
| H | 3.4809845  | -1.6140153 | 0.7142429  |
| H | 3.7354969  | -3.2907810 | 1.2368870  |

3\_1.log

E = -347.841829  
H = -347.676461  
G = -347.717170

NImag=0

|   |            |            |           |
|---|------------|------------|-----------|
| C | -0.8611824 | -0.5364645 | 1.0241927 |
| C | -1.8465304 | 0.3331989  | 1.3096339 |
| C | -1.9084994 | 1.5449569  | 2.1855551 |
| C | -0.7838952 | 1.7647804  | 3.1881489 |
| C | 0.6085180  | 1.7603819  | 2.5579621 |
| C | 1.2061245  | 0.3643173  | 2.4192309 |
| C | 0.5538479  | -0.6121831 | 1.4636883 |
| O | 1.2269091  | -1.5417248 | 1.0294969 |
| H | -1.0977502 | -1.3408201 | 0.3301162 |
| H | -2.7856891 | 0.1377087  | 0.7906100 |
| H | -2.8731909 | 1.5188387  | 2.7072185 |
| H | -1.9737393 | 2.4120491  | 1.5103441 |
| H | -0.8297070 | 0.9952892  | 3.9702053 |
| H | -0.9638538 | 2.7251602  | 3.6826035 |
| H | 1.2923056  | 2.3408037  | 3.1857696 |
| H | 0.5799664  | 2.2617884  | 1.5814056 |
| H | 1.1926547  | -0.1305540 | 3.4009858 |
| H | 2.2568106  | 0.4183731  | 2.1178324 |

3\_2.log

E = -347.842288  
H = -347.676827  
G = -347.716448

NImag=0

|   |            |            |           |
|---|------------|------------|-----------|
| C | -0.8859987 | -0.5686308 | 0.9764523 |
| C | -1.8430167 | 0.3363761  | 1.2368327 |
| C | -1.7197607 | 1.5805239  | 2.0772209 |
| C | -0.7994250 | 1.4116043  | 3.2961449 |
| C | 0.6940746  | 1.5311281  | 2.9769210 |
| C | 1.1002473  | 0.9295894  | 1.6189880 |
| C | 0.5390578  | -0.4524327 | 1.3763174 |
| O | 1.2424747  | -1.4524383 | 1.4443431 |
| H | -1.1352564 | -1.4813547 | 0.4393876 |
| H | -2.8398437 | 0.1210229  | 0.8544494 |

|   |            |           |           |
|---|------------|-----------|-----------|
| H | -2.7245020 | 1.8528530 | 2.4127742 |
| H | -1.3721414 | 2.4187955 | 1.4550014 |
| H | -1.0061960 | 0.4324680 | 3.7448789 |
| H | -1.0594391 | 2.1624937 | 4.0490652 |
| H | 1.2748440  | 1.0526580 | 3.7725605 |
| H | 0.9833265  | 2.5874877 | 2.9597043 |
| H | 2.1892139  | 0.8694021 | 1.5485438 |
| H | 0.7389430  | 1.5842548 | 0.8175135 |

3\_3.log

E = -347.841624  
H = -347.676131  
G = -347.715929

NImag=0

|   |            |            |            |
|---|------------|------------|------------|
| C | -0.7625753 | -0.2865153 | 0.7451928  |
| C | -1.7787848 | 0.4222117  | 1.2637790  |
| C | -1.8243120 | 1.0360340  | 2.6360005  |
| C | -0.7720040 | 2.1350279  | 2.8759405  |
| C | 0.6478711  | 1.7474576  | 2.4420934  |
| C | 0.9687203  | 0.2533879  | 2.6067330  |
| C | 0.5249275  | -0.5815152 | 1.4214460  |
| O | 1.2413239  | -1.4734694 | 0.9834496  |
| H | -0.8625835 | -0.7325833 | -0.2419051 |
| H | -2.6676076 | 0.5354874  | 0.6447577  |
| H | -1.6794035 | 0.2425177  | 3.3785182  |
| H | -2.8199427 | 1.4490469  | 2.8150812  |
| H | -0.7811507 | 2.3612863  | 3.9480461  |
| H | -1.0720333 | 3.0505231  | 2.3552124  |
| H | 1.3682980  | 2.3286268  | 3.0255529  |
| H | 0.8086578  | 2.0247521  | 1.3940898  |
| H | 0.4924288  | -0.1458657 | 3.5127450  |
| H | 2.0441691  | 0.0889896  | 2.7124691  |

3\_sy\_c\_1.log

E = -1188.219004  
H = -1187.852904  
G = -1187.921972

NImag=0

|   |            |            |            |
|---|------------|------------|------------|
| C | -0.5770320 | 4.0771109  | -2.0059103 |
| C | -0.3968130 | 2.6229852  | -2.3712272 |
| C | -1.6644591 | 4.8899690  | -2.2905595 |
| O | -1.8656134 | 6.0276838  | -1.7404084 |
| C | -1.3911002 | 1.7006457  | -1.6096579 |
| C | -1.0949857 | 0.2265291  | -1.7181204 |
| C | 0.1673393  | -0.2838021 | -1.3859985 |
| C | 0.4338369  | -1.6404758 | -1.5124295 |
| C | -0.5701138 | -2.4955991 | -1.9858889 |
| C | -1.8335467 | -2.0001212 | -2.3246904 |
| C | -2.0885863 | -0.6403608 | -2.1829082 |
| C | -2.7527944 | 4.4305118  | -3.2715045 |
| C | -0.4216842 | 2.2620498  | -3.8701306 |
| S | -1.3639007 | 2.2163695  | 0.1841307  |
| C | -2.7192733 | 3.4039966  | 0.3385501  |
| C | -2.1536410 | 0.8085046  | 1.0006760  |
| C | -0.2988838 | -3.9020388 | -2.1232804 |
| N | -0.0809617 | -5.0340850 | -2.2334891 |
| C | -2.2977087 | 3.8637257  | -4.6207243 |
| C | -1.7597580 | 2.4329210  | -4.5882239 |
| H | 0.1301326  | 4.4729776  | -1.2763348 |
| H | 0.6023001  | 2.3362137  | -2.0185888 |

|   |            |            |            |
|---|------------|------------|------------|
| H | -2.4254785 | 1.8911533  | -1.9127213 |
| H | 0.9507590  | 0.3749110  | -1.0201829 |
| H | 1.4081802  | -2.0393066 | -1.2505508 |
| H | -2.6028584 | -2.6730021 | -2.6887752 |
| H | -3.0689637 | -0.2475378 | -2.4379421 |
| H | -3.3979421 | 3.6910411  | -2.7699105 |
| H | -3.3776351 | 5.3123570  | -3.4450019 |
| H | -0.0901476 | 1.2223491  | -3.9921380 |
| H | 0.3304994  | 2.8923561  | -4.3604224 |
| H | -2.9508516 | 3.4649135  | 1.4045740  |
| H | -2.3840299 | 4.3697356  | -0.0426011 |
| H | -3.5815229 | 3.0315694  | -0.2191372 |
| H | -2.3444014 | 1.1162452  | 2.0307525  |
| H | -1.4649773 | -0.0364137 | 0.9909507  |
| H | -3.0887736 | 0.5623635  | 0.4925843  |
| H | -3.1553403 | 3.8856727  | -5.3044310 |
| H | -1.5369646 | 4.5281725  | -5.0544564 |
| H | -1.6335166 | 2.0809894  | -5.6193946 |
| H | -2.5173880 | 1.7757199  | -4.1368773 |

3\_sy\_c\_10.log

E = -1188.213830  
H = -1187.847606  
G = -1187.917055

NImag=0

|   |            |            |            |
|---|------------|------------|------------|
| C | -0.7253236 | 3.9621861  | -2.0456355 |
| C | -0.6499240 | 2.5125428  | -2.4590005 |
| C | -1.7483199 | 4.8435842  | -2.3511982 |
| O | -1.8898664 | 6.0115722  | -1.8495925 |
| C | -1.4962960 | 1.5910069  | -1.5357163 |
| C | -1.1786580 | 0.1219372  | -1.6556562 |
| C | -2.1953768 | -0.7783787 | -1.9889596 |
| C | -1.9219873 | -2.1338381 | -2.1357912 |
| C | -0.6152633 | -2.5912716 | -1.9350180 |
| C | 0.4129357  | -1.7027127 | -1.5944832 |
| C | 0.1264797  | -0.3504441 | -1.4617278 |
| C | -2.7910762 | 4.3886601  | -3.3782460 |
| C | -1.0381146 | 2.1460623  | -3.9262140 |
| S | -1.2565416 | 2.1408404  | 0.2287900  |
| C | -2.5694159 | 3.3577812  | 0.4935210  |
| C | -1.9761560 | 0.7609033  | 1.1506605  |
| C | -0.3240950 | -3.9931159 | -2.0787963 |
| N | -0.0904456 | -5.1215390 | -2.1938545 |
| C | -2.2232153 | 4.2328525  | -4.7991095 |
| C | -0.9816731 | 3.3279138  | -4.8952265 |
| H | 0.0382073  | 4.3060779  | -1.3469332 |
| H | 0.3933923  | 2.2011180  | -2.3214316 |
| H | -2.5652199 | 1.7567277  | -1.7108635 |
| H | -3.2079681 | -0.4141671 | -2.1373916 |
| H | -2.7090991 | -2.8327042 | -2.3989892 |
| H | 1.4208816  | -2.0724164 | -1.4388571 |
| H | 0.9278659  | 0.3346813  | -1.1974549 |
| H | -3.2365825 | 3.4341281  | -3.0663500 |
| H | -3.5975494 | 5.1285465  | -3.3859314 |
| H | -2.0509439 | 1.7194826  | -3.9519257 |
| H | -0.3699238 | 1.3483448  | -4.2697087 |
| H | -2.6972919 | 3.4422057  | 1.5753083  |
| H | -2.2520657 | 4.3059573  | 0.0592625  |
| H | -3.4874637 | 2.9959021  | 0.0247970  |
| H | -2.0599743 | 1.0888767  | 2.1885575  |
| H | -1.2998901 | -0.0919583 | 1.0888921  |

|   |            |           |            |
|---|------------|-----------|------------|
| H | -2.9592182 | 0.5150512 | 0.7429781  |
| H | -3.0135767 | 3.8189667 | -5.4386831 |
| H | -1.9821359 | 5.2237895 | -5.2041494 |
| H | -0.0742998 | 3.9076484 | -4.6964925 |
| H | -0.8954108 | 2.9532986 | -5.9217792 |

3\_sy\_c\_10\_ts1.log

E = -1188.184416

H = -1187.821274

G = -1187.891969

NImag=1

|   |            |            |            |
|---|------------|------------|------------|
| C | -2.3473443 | -0.1840781 | -1.2156853 |
| C | -1.1014068 | -0.6370856 | -0.7706540 |
| C | -3.6026859 | -0.3984413 | -0.5569376 |
| O | -4.6879631 | -0.0125144 | -1.0328149 |
| C | -0.0149346 | 0.7658879  | 0.5043201  |
| C | 1.3584254  | 0.3774531  | 0.3105431  |
| C | 1.9816211  | -0.4639358 | 1.2675996  |
| C | 3.2588369  | -0.9539636 | 1.0753469  |
| C | 3.9751342  | -0.6145026 | -0.0875264 |
| C | 3.3824706  | 0.2192514  | -1.0486984 |
| C | 2.0992532  | 0.7017705  | -0.8540968 |
| C | -3.5895521 | -1.0949733 | 0.7942300  |
| C | -0.9040733 | -1.8738893 | 0.1048662  |
| S | -0.5032620 | 2.3053390  | -0.2002430 |
| C | -2.0684768 | 2.6017034  | 0.6411101  |
| C | 0.5076359  | 3.5790359  | 0.5997683  |
| C | 5.3011966  | -1.1118040 | -0.2870076 |
| N | 6.3772208  | -1.5164789 | -0.4486177 |
| C | -3.2777531 | -2.5988613 | 0.7067375  |
| C | -2.0028896 | -2.9293487 | -0.0835231 |
| H | -2.3826353 | 0.4379835  | -2.1086075 |
| H | -0.3059325 | -0.4987002 | -1.5038951 |
| H | -0.4152289 | 0.6567270  | 1.5119775  |
| H | 1.4390668  | -0.7235481 | 2.1724002  |
| H | 3.7171525  | -1.5942812 | 1.8228604  |
| H | 3.9323928  | 0.4822947  | -1.9471820 |
| H | 1.6646317  | 1.3376087  | -1.6220045 |
| H | -2.8390641 | -0.6081792 | 1.4319252  |
| H | -4.5681923 | -0.9461020 | 1.2587192  |
| H | -0.8525213 | -1.6092021 | 1.1675477  |
| H | 0.0701552  | -2.3044068 | -0.1467417 |
| H | -2.3820728 | 3.6168124  | 0.3916681  |
| H | -2.7937169 | 1.8828415  | 0.2626270  |
| H | -1.9184636 | 2.4918821  | 1.7171392  |
| H | 0.1357122  | 4.5538618  | 0.2757836  |
| H | 1.5372218  | 3.4442171  | 0.2634163  |
| H | 0.4336920  | 3.4665523  | 1.6829146  |
| H | -3.1740658 | -2.9741481 | 1.7316478  |
| H | -4.1332280 | -3.1214212 | 0.2635851  |
| H | -2.2306631 | -3.0228608 | -1.1506002 |
| H | -1.6252435 | -3.9042706 | 0.2437791  |

3\_sy\_c\_11.log

E = -1188.203218

H = -1187.837240

G = -1187.906152

NImag=0

|   |            |           |            |
|---|------------|-----------|------------|
| C | -0.8186777 | 3.1130205 | -2.1064749 |
| C | -1.9406101 | 2.3378277 | -2.7666757 |

|   |            |            |            |
|---|------------|------------|------------|
| C | -0.4372101 | 4.4295260  | -2.3215229 |
| O | 0.4499908  | 5.0396196  | -1.6253363 |
| C | -2.4282431 | 1.1453326  | -1.9191426 |
| C | -1.5398230 | -0.0878393 | -1.8915649 |
| C | -0.2095110 | -0.0516455 | -2.3217786 |
| C | 0.5710848  | -1.2028075 | -2.2954422 |
| C | 0.0195706  | -2.4003071 | -1.8293804 |
| C | -1.3129729 | -2.4548879 | -1.4037397 |
| C | -2.0825783 | -1.3001883 | -1.4426718 |
| C | -1.0441701 | 5.2651182  | -3.4649688 |
| C | -3.1232745 | 3.2164668  | -3.2286374 |
| S | -2.8708727 | 1.4551329  | -0.1239272 |
| C | -1.3503634 | 1.6360156  | 0.8338802  |
| C | -3.5612512 | 3.1142019  | -0.0027830 |
| C | 0.8263222  | -3.5913935 | -1.7958198 |
| N | 1.4749004  | -4.5503786 | -1.7681685 |
| C | -1.4786883 | 4.4896988  | -4.7122701 |
| C | -2.8687336 | 3.8584939  | -4.5949125 |
| H | -0.2447661 | 2.5917364  | -1.3444693 |
| H | -1.6066891 | 1.8049064  | -3.6809406 |
| H | -3.4099580 | 0.8265938  | -2.2900071 |
| H | 0.2249959  | 0.8739300  | -2.6837658 |
| H | 1.6016989  | -1.1742041 | -2.6332066 |
| H | -1.7380038 | -3.3911361 | -1.0578576 |
| H | -3.1230136 | -1.3491675 | -1.1311952 |
| H | -1.8831005 | 5.8632311  | -3.0777264 |
| H | -0.2605128 | 5.9821153  | -3.7315597 |
| H | -3.3021728 | 4.0068597  | -2.4939215 |
| H | -4.0426503 | 2.6192876  | -3.2853548 |
| H | -1.6419306 | 1.4943532  | 1.8768391  |
| H | -0.6583032 | 0.8455867  | 0.5364114  |
| H | -0.9197497 | 2.6230059  | 0.6743134  |
| H | -3.7927024 | 3.2585438  | 1.0553189  |
| H | -4.4800313 | 3.1439099  | -0.5896002 |
| H | -2.8260895 | 3.8402532  | -0.3511032 |
| H | -1.4658175 | 5.1529511  | -5.5852944 |
| H | -0.7346507 | 3.7070794  | -4.9110983 |
| H | -2.9943465 | 3.1065081  | -5.3842401 |
| H | -3.6343954 | 4.6261493  | -4.7644050 |

3\_sy\_c\_11\_ts1.log

E = -1188.174490

H = -1187.811035

G = -1187.881602

NImag=1

|   |            |            |            |
|---|------------|------------|------------|
| C | 1.7522951  | -0.3617256 | 1.2414418  |
| C | 0.9766751  | -0.9457564 | 0.2371878  |
| C | 3.1459939  | -0.0473138 | 1.1810811  |
| O | 3.6656777  | 0.7645808  | 1.9779158  |
| C | -0.1787477 | 0.4811510  | -0.8846833 |
| C | -1.5639670 | 0.2522750  | -0.5398914 |
| C | -2.3097657 | 1.0690322  | 0.3421315  |
| C | -3.6043450 | 0.7378777  | 0.7086852  |
| C | -4.1966494 | -0.4357523 | 0.2189856  |
| C | -3.4700594 | -1.2730251 | -0.6467221 |
| C | -2.1824538 | -0.9320658 | -1.0150529 |
| C | 4.0596395  | -0.7725729 | 0.1959133  |
| C | 1.5893924  | -1.6696892 | -0.9471747 |
| S | 0.3448104  | 2.1805666  | -0.8195529 |
| C | 0.9586749  | 2.6176507  | 0.8423650  |
| C | 1.9074235  | 2.0923172  | -1.7117834 |

|   |            |            |            |
|---|------------|------------|------------|
| C | -5.5322316 | -0.7793850 | 0.6007724  |
| N | -6.6158099 | -1.0581049 | 0.9094576  |
| C | 3.8429298  | -2.2933432 | 0.1837451  |
| C | 2.5664843  | -2.7805900 | -0.5425665 |
| H | 1.2317543  | 0.0417195  | 2.1082716  |
| H | 0.0239944  | -1.3610773 | 0.5662379  |
| H | 0.1200716  | 0.1116802  | -1.8639257 |
| H | -1.8849421 | 1.9837367  | 0.7466393  |
| H | -4.1622948 | 1.3860416  | 1.3773674  |
| H | -3.9266461 | -2.1810785 | -1.0283582 |
| H | -1.6309110 | -1.5790086 | -1.6923413 |
| H | 3.9449043  | -0.3577781 | -0.8136905 |
| H | 5.0826903  | -0.5485062 | 0.5118643  |
| H | 2.1044203  | -0.9577797 | -1.6003780 |
| H | 0.7833405  | -2.1061152 | -1.5467087 |
| H | 1.0129939  | 3.7082148  | 0.8322422  |
| H | 0.2275948  | 2.2923520  | 1.5831311  |
| H | 1.9351477  | 2.1778586  | 1.0431263  |
| H | 2.3787557  | 3.0740048  | -1.6398096 |
| H | 1.6867978  | 1.8562669  | -2.7538529 |
| H | 2.5352264  | 1.3250991  | -1.2555716 |
| H | 4.7171241  | -2.7593519 | -0.2834194 |
| H | 3.8346096  | -2.6375030 | 1.2240277  |
| H | 2.0388873  | -3.5104226 | 0.0820043  |
| H | 2.8497141  | -3.3090650 | -1.4598860 |

3\_sy\_c\_12.log

E = -1188.215197

H = -1187.848968

G = -1187.917715

NImag=0

|   |            |            |            |
|---|------------|------------|------------|
| C | -1.0658392 | 4.1565383  | -1.8313624 |
| C | -0.7021259 | 2.7308812  | -2.1819568 |
| C | -1.6076552 | 5.1580394  | -2.6282603 |
| O | -1.7055947 | 6.3810054  | -2.2634251 |
| C | -1.6856500 | 1.6553957  | -1.6321742 |
| C | -1.2356397 | 0.2221508  | -1.7503211 |
| C | 0.0734453  | -0.1717810 | -1.4401109 |
| C | 0.4586832  | -1.5014211 | -1.5625631 |
| C | -0.4711026 | -2.4493180 | -2.0051435 |
| C | -1.7792516 | -2.0722038 | -2.3293627 |
| C | -2.1503762 | -0.7397552 | -2.1980063 |
| C | -2.1390904 | 4.8673066  | -4.0433835 |
| C | -0.4827449 | 2.4572556  | -3.6834375 |
| S | -2.1405037 | 2.1139999  | 0.1089238  |
| C | -2.9381851 | 0.6253681  | 0.7418271  |
| C | -0.5920869 | 2.0690108  | 1.0287126  |
| C | -0.0741042 | -3.8263172 | -2.1339531 |
| N | 0.2455028  | -4.9346670 | -2.2366157 |
| C | -2.7670412 | 3.4922942  | -4.2766789 |
| C | -1.7526224 | 2.3726367  | -4.5360411 |
| H | -0.7117512 | 4.5001238  | -0.8573016 |
| H | 0.2635069  | 2.5244803  | -1.6996750 |
| H | -2.6612622 | 1.7673812  | -2.1179145 |
| H | 0.8095993  | 0.5554499  | -1.1124334 |
| H | 1.4721233  | -1.8055130 | -1.3227622 |
| H | -2.4902320 | -2.8139927 | -2.6776297 |
| H | -3.1643770 | -0.4388616 | -2.4475317 |
| H | -2.8845921 | 5.6470583  | -4.2306514 |
| H | -1.3303317 | 5.0390169  | -4.7700101 |
| H | 0.0840225  | 1.5262042  | -3.8070271 |

|   |            |            |            |
|---|------------|------------|------------|
| H | 0.1584046  | 3.2631186  | -4.0574672 |
| H | -3.2295142 | 0.8440983  | 1.7712862  |
| H | -3.8292996 | 0.4415122  | 0.1380739  |
| H | -2.2536591 | -0.2239151 | 0.7059283  |
| H | -0.8471564 | 2.2902744  | 2.0673284  |
| H | 0.0628424  | 2.8480801  | 0.6362925  |
| H | -0.1329418 | 1.0821207  | 0.9518205  |
| H | -3.3898744 | 3.2480672  | -3.4064193 |
| H | -3.4514776 | 3.5430119  | -5.1320073 |
| H | -1.4470066 | 2.4012025  | -5.5893485 |
| H | -2.2393404 | 1.3989624  | -4.3885178 |

3\_sy\_c\_13.log

E = -1188.214574

H = -1187.848557

G = -1187.918247

NImag=0

|   |            |            |            |
|---|------------|------------|------------|
| C | -1.9907163 | 3.9443501  | -2.0045264 |
| C | -1.4860950 | 2.5736669  | -2.3882272 |
| C | -1.6046706 | 5.1053815  | -2.6627039 |
| O | -2.1054964 | 6.2640636  | -2.4839100 |
| C | -1.9003083 | 1.5474247  | -1.3232616 |
| C | -1.3930759 | 0.1436437  | -1.5422779 |
| C | -0.0492347 | -0.1015264 | -1.8539994 |
| C | 0.4020522  | -1.4004511 | -2.0473494 |
| C | -0.5010991 | -2.4652469 | -1.9345043 |
| C | -1.8463710 | -2.2351399 | -1.6277827 |
| C | -2.2818806 | -0.9293643 | -1.4298512 |
| C | -0.5361927 | 4.9752637  | -3.7556343 |
| C | -1.9453886 | 2.1003516  | -3.7869946 |
| S | -1.2371937 | 2.1672923  | 0.3220651  |
| C | -2.6083202 | 3.0573006  | 1.1003585  |
| C | -1.2892992 | 0.6832981  | 1.3582562  |
| C | -0.0380858 | -3.8126382 | -2.1383313 |
| N | 0.3349629  | -4.8966508 | -2.3017889 |
| C | -1.0879966 | 4.2548963  | -4.9985328 |
| C | -1.1047623 | 2.7241217  | -4.9077376 |
| H | -2.9054614 | 3.9905644  | -1.4132638 |
| H | -0.3846134 | 2.5716934  | -2.4079380 |
| H | -2.9886139 | 1.5336827  | -1.1893294 |
| H | 0.6562906  | 0.7195548  | -1.9460511 |
| H | 1.4425330  | -1.5933008 | -2.2866349 |
| H | -2.5369528 | -3.0678115 | -1.5454346 |
| H | -3.3239472 | -0.7408076 | -1.1879542 |
| H | -0.2226581 | 5.9895681  | -4.0209719 |
| H | 0.3517521  | 4.4372632  | -3.3938130 |
| H | -3.0068992 | 2.3521370  | -3.9115968 |
| H | -1.8573641 | 1.0102806  | -3.8837294 |
| H | -2.4314659 | 3.0115009  | 2.1770255  |
| H | -2.5864159 | 4.0881193  | 0.7547565  |
| H | -3.5505477 | 2.5687256  | 0.8446442  |
| H | -1.0402810 | 1.0103737  | 2.3697932  |
| H | -0.5352292 | -0.0198399 | 1.0048394  |
| H | -2.2875645 | 0.2413301  | 1.3291199  |
| H | -2.1023924 | 4.6265194  | -5.2018623 |
| H | -0.4790526 | 4.5242495  | -5.8705068 |
| H | -0.0683321 | 2.3767358  | -4.7824849 |
| H | -1.4507124 | 2.3212244  | -5.8674738 |

3\_sy\_c\_14.log



```

E =      -1188.211194
H =      -1187.845078
G =      -1187.915061
NImag=0
C        -0.6293099      3.2362313      -2.5567811
C        -1.6202145      2.2633899      -3.1610793
C        -0.7956460      4.5771279      -2.2343264
O         0.1247493      5.3146201      -1.7375277
C        -2.1788352      1.2153775      -2.1455738
C        -1.4051250      -0.0634276     -1.9594014
C        -0.0049204      -0.0943893     -2.0077219
C         0.6822171      -1.2889484     -1.8353108
C        -0.0361580      -2.4705621     -1.6143692
C        -1.4340876      -2.4605060     -1.5710309
C        -2.1073266      -1.2568341     -1.7458097
C        -2.1462475      5.2583168      -2.4851619
C        -2.8280902      2.8682490      -3.9163029
S        -2.4169694      2.1256527      -0.5409652
C        -3.5701457      1.0390044      0.3281337
C        -0.9403855      1.8334109      0.4518805
C         0.6725567      -3.7105743     -1.4375619
N         1.2424502      -4.7084807     -1.2942618
C        -2.5039597      5.4054134      -3.9714228
C        -2.4626303      4.0864750      -4.7654010
H         0.3765736      2.8503387      -2.3922928
H        -1.0809521      1.6536060      -3.9010012
H        -3.2132516      0.9513533      -2.4002708
H         0.5576260      0.8165219      -2.1799713
H         1.7662715      -1.3107256     -1.8725271
H        -1.9819523      -3.3828777     -1.4096324
H        -3.1938695      -1.2449376     -1.7265971
H        -2.9494038      4.7151290      -1.9731057
H        -2.0939894      6.2505974      -2.0267266
H        -3.6270727      3.1359189      -3.2112401
H        -3.2436135      2.0757407      -4.5496344
H        -3.7406746      1.4801723      1.3123196
H        -4.5047554      1.0201467      -0.2349209
H        -3.1513970      0.0360155      0.4304472
H        -1.1324193      2.2996171      1.4209426
H        -0.1049716      2.3237658      -0.0467149
H        -0.7736458      0.7610993      0.5688125
H        -3.5127553      5.8325323      -4.0383915
H        -1.8281093      6.1329518      -4.4377869
H        -1.4624185      3.9298952      -5.1861470
H        -3.1473413      4.1624922      -5.6174656

```

3\_sy\_c\_14\_ts1.log

```

E =      -1188.180926
H =      -1187.817199
G =      -1187.887748
NImag=1
C         1.3440908      -1.4172580      0.4924527
C         1.1520951      -0.9112985     -0.8015964
C         2.5081500      -1.2520383      1.3068229
O         2.6215826      -1.7778072      2.4331904
C        -0.0537170      0.8410665     -0.9490072
C        -1.3869563      0.4142937     -0.5754532
C        -1.9029070      0.4563934      0.7386639
C        -3.1455912      -0.0818100      1.0404338
C        -3.9094338      -0.6945721      0.0381642
C        -3.4116032      -0.7631060     -1.2745460

```

|   |            |            |            |
|---|------------|------------|------------|
| C | -2.1758336 | -0.2170614 | -1.5682472 |
| C | 3.6572971  | -0.4035690 | 0.7796450  |
| C | 2.2905262  | -0.5118537 | -1.7393049 |
| S | 0.7452173  | 2.1994978  | -0.1824593 |
| C | -0.4358241 | 3.5706632  | -0.0573904 |
| C | 1.0039708  | 1.8384751  | 1.5802808  |
| C | -5.1916612 | -1.2509898 | 0.3513242  |
| N | -6.2304330 | -1.7018964 | 0.6036766  |
| C | 4.4111070  | -1.0341158 | -0.4033210 |
| C | 3.5176229  | -1.4236342 | -1.5935049 |
| H | 0.5357067  | -1.9926667 | 0.9405409  |
| H | 0.3289319  | -1.3916614 | -1.3293813 |
| H | 0.1059508  | 0.9637159  | -2.0192783 |
| H | -1.3395543 | 0.9143928  | 1.5428499  |
| H | -3.5261961 | -0.0333936 | 2.0559019  |
| H | -4.0007328 | -1.2380725 | -2.0528363 |
| H | -1.7991410 | -0.2675653 | -2.5864342 |
| H | 3.2736332  | 0.5774200  | 0.4705986  |
| H | 4.3494266  | -0.2331255 | 1.6088916  |
| H | 2.6047867  | 0.5271866  | -1.5848877 |
| H | 1.9068597  | -0.5611285 | -2.7631848 |
| H | 0.0535519  | 4.3709161  | 0.5030401  |
| H | -0.6556917 | 3.8996941  | -1.0740742 |
| H | -1.3418334 | 3.2368905  | 0.4513383  |
| H | 1.9657894  | 2.2718112  | 1.8578965  |
| H | 1.0218579  | 0.7560815  | 1.7133683  |
| H | 0.2043860  | 2.2897279  | 2.1690700  |
| H | 5.1582419  | -0.3050493 | -0.7379674 |
| H | 4.9645215  | -1.9127683 | -0.0530814 |
| H | 3.1778034  | -2.4596884 | -1.4920650 |
| H | 4.1110331  | -1.3775255 | -2.5131445 |

3\_sy\_c\_15.log

E = -1188.211851

H = -1187.846176

G = -1187.916058

NImag=0

|   |            |            |            |
|---|------------|------------|------------|
| C | -0.8386794 | 3.2463886  | -2.2594261 |
| C | -2.0522400 | 2.4355499  | -2.6623090 |
| C | -0.2416204 | 4.2258524  | -3.0353628 |
| O | 0.7763692  | 4.9209991  | -2.6943424 |
| C | -2.3498124 | 1.2846528  | -1.6828936 |
| C | -1.4692391 | 0.0617188  | -1.7244789 |
| C | -0.0846448 | 0.1343078  | -1.9294304 |
| C | 0.6828167  | -1.0231606 | -1.9706821 |
| C | 0.0657322  | -2.2679059 | -1.7981135 |
| C | -1.3154540 | -2.3591158 | -1.5968801 |
| C | -2.0721250 | -1.1938650 | -1.5657660 |
| C | -0.8473728 | 4.5252366  | -4.4125049 |
| C | -3.3384456 | 3.2712141  | -2.8595913 |
| S | -2.4749469 | 1.9954984  | 0.0570446  |
| C | -3.6893194 | 0.8913337  | 0.8061095  |
| C | -0.9999407 | 1.4556279  | 0.9459666  |
| C | 0.8601991  | -3.4673035 | -1.8349193 |
| N | 1.4995340  | -4.4324431 | -1.8642071 |
| C | -2.2639047 | 5.1135648  | -4.3514603 |
| C | -3.3687338 | 4.0722891  | -4.1635530 |
| H | -0.3693557 | 3.0482212  | -1.2974100 |
| H | -1.8830715 | 1.9047086  | -3.6177661 |
| H | -3.3830356 | 0.9542532  | -1.8308254 |
| H | 0.3930306  | 1.0989425  | -2.0624889 |

|   |            |            |            |
|---|------------|------------|------------|
| H | 1.7539576  | -0.9664246 | -2.1338281 |
| H | -1.7869414 | -3.3285372 | -1.4751142 |
| H | -3.1479783 | -1.2605539 | -1.4292906 |
| H | -0.1707473 | 5.2316439  | -4.9027650 |
| H | -0.8725514 | 3.6130669  | -5.0283721 |
| H | -3.4589789 | 3.9509183  | -2.0043778 |
| H | -4.2100264 | 2.6016594  | -2.8704964 |
| H | -3.7824644 | 1.1835971  | 1.8539577  |
| H | -4.6393333 | 1.0439343  | 0.2915489  |
| H | -3.3555687 | -0.1450320 | 0.7276451  |
| H | -1.1434061 | 1.7749366  | 1.9806862  |
| H | -0.1282855 | 1.9541150  | 0.5223935  |
| H | -0.9049550 | 0.3699716  | 0.8864156  |
| H | -2.3118758 | 5.8603604  | -3.5463960 |
| H | -2.4692782 | 5.6496000  | -5.2864480 |
| H | -3.3210506 | 3.3639929  | -5.0035367 |
| H | -4.3429560 | 4.5711857  | -4.2352317 |

3\_sy\_c\_15\_ts1.log

E = -1188.144571

H = -1187.782372

G = -1187.853562

NImag=1

|   |            |            |            |
|---|------------|------------|------------|
| C | 2.7818513  | 0.3742425  | -0.3884581 |
| C | 1.6010843  | -0.3117336 | -0.5431567 |
| C | 3.6255695  | -0.0434520 | 0.7269764  |
| O | 4.6488611  | 0.5369292  | 1.0948202  |
| C | -0.3432768 | 1.1223782  | -0.9183967 |
| C | -1.4770764 | 0.4024567  | -0.4437288 |
| C | -1.9896267 | 0.4697557  | 0.8816859  |
| C | -3.0544223 | -0.3148951 | 1.2861767  |
| C | -3.6634333 | -1.2103286 | 0.3907820  |
| C | -3.1804139 | -1.2944742 | -0.9301720 |
| C | -2.1220962 | -0.5072498 | -1.3324312 |
| C | 3.3369938  | -1.4825156 | 1.1789886  |
| C | 1.4183455  | -1.3385169 | -1.6028225 |
| S | 0.3049550  | 2.5612786  | -0.2218918 |
| C | -1.0372080 | 3.7543228  | 0.0416029  |
| C | 0.7835282  | 2.2599092  | 1.5136845  |
| C | -4.7602873 | -2.0203960 | 0.8133219  |
| N | -5.6526513 | -2.6804203 | 1.1566687  |
| C | 3.2808714  | -2.4495921 | -0.0456901 |
| C | 1.9596521  | -2.5964772 | -0.8435624 |
| H | 3.3095094  | 0.7785389  | -1.2521892 |
| H | 1.1055728  | -0.6168246 | 0.3806724  |
| H | -0.1197786 | 1.1015913  | -1.9797444 |
| H | -1.5475415 | 1.1395041  | 1.6108033  |
| H | -3.4224028 | -0.2411699 | 2.3053069  |
| H | -3.6506617 | -1.9758773 | -1.6330357 |
| H | -1.7705840 | -0.5719765 | -2.3584887 |
| H | 4.1443701  | -1.7866573 | 1.8515101  |
| H | 2.3986110  | -1.5365959 | 1.7460776  |
| H | 2.0240151  | -1.1172944 | -2.4878228 |
| H | 0.3822695  | -1.5252498 | -1.9011998 |
| H | -0.6188080 | 4.6071109  | 0.5814922  |
| H | -1.3846893 | 4.0666412  | -0.9441872 |
| H | -1.8481143 | 3.2975472  | 0.6114072  |
| H | 1.6995795  | 2.8228267  | 1.6982357  |
| H | 0.9656740  | 1.1958446  | 1.6553099  |
| H | -0.0110832 | 2.6084102  | 2.1742809  |
| H | 4.0884151  | -2.1719685 | -0.7366900 |

|   |           |            |            |
|---|-----------|------------|------------|
| H | 3.5252630 | -3.4527803 | 0.3215440  |
| H | 1.1734847 | -2.9211469 | -0.1499287 |
| H | 2.0975313 | -3.4047223 | -1.5711775 |

3\_sy\_c\_16.log

E = -1188.211006  
H = -1187.845011  
G = -1187.914012

NImag=0

|   |            |            |            |
|---|------------|------------|------------|
| C | -2.2199701 | 3.7760619  | -1.9604022 |
| C | -1.5456154 | 2.4665494  | -2.2966036 |
| C | -1.8382148 | 4.9935685  | -2.4956168 |
| O | -2.4375830 | 6.1106419  | -2.3232000 |
| C | -2.0274279 | 1.3555357  | -1.3525144 |
| C | -1.4754903 | -0.0322863 | -1.6096809 |
| C | -2.3372358 | -1.1315696 | -1.5520625 |
| C | -1.8599688 | -2.4192944 | -1.7675867 |
| C | -0.4998115 | -2.6059151 | -2.0372605 |
| C | 0.3760303  | -1.5149566 | -2.0954196 |
| C | -0.1164295 | -0.2336099 | -1.8826216 |
| C | -0.6250606 | 5.0005051  | -3.4357863 |
| C | -1.7620286 | 2.0271176  | -3.7679999 |
| S | -1.6320115 | 1.6500534  | 0.4557299  |
| C | -0.0796879 | 2.5632865  | 0.4594195  |
| C | -2.7804049 | 2.8822041  | 1.1066124  |
| C | 0.0057518  | -3.9348296 | -2.2598872 |
| N | 0.4129030  | -5.0041959 | -2.4380403 |
| C | -0.9299541 | 4.2978036  | -4.7694443 |
| C | -0.8288529 | 2.7684853  | -4.7326592 |
| H | -3.1683760 | 3.7291236  | -1.4262525 |
| H | -0.4541068 | 2.5456349  | -2.1660594 |
| H | -3.1241182 | 1.3127001  | -1.3413735 |
| H | -3.3918012 | -0.9782434 | -1.3404916 |
| H | -2.5300348 | -3.2716150 | -1.7291348 |
| H | 1.4277819  | -1.6729880 | -2.3096147 |
| H | 0.5652810  | 0.6100812  | -1.9439749 |
| H | -0.3670302 | 6.0485594  | -3.6168570 |
| H | 0.2490981  | 4.5204964  | -2.9703962 |
| H | -2.8127886 | 2.2032791  | -4.0320763 |
| H | -1.5716241 | 0.9548399  | -3.8979713 |
| H | 0.1332274  | 2.7912089  | 1.5061201  |
| H | 0.7004191  | 1.9126287  | 0.0611032  |
| H | -0.1944245 | 3.4762936  | -0.1278873 |
| H | -2.6752854 | 2.8388881  | 2.1929440  |
| H | -3.7898721 | 2.5803571  | 0.8213764  |
| H | -2.5352983 | 3.8683796  | 0.7171699  |
| H | -1.9329850 | 4.5965556  | -5.1057272 |
| H | -0.2279137 | 4.6532882  | -5.5341831 |
| H | 0.2058419  | 2.4995721  | -4.4720348 |
| H | -1.0011279 | 2.3824044  | -5.7448547 |

3\_sy\_c\_16\_ts1.log

E = -1188.145192  
H = -1187.783566  
G = -1187.855855

NImag=1

|   |           |            |            |
|---|-----------|------------|------------|
| C | 2.4992763 | -0.7751942 | -0.9513184 |
| C | 1.4320731 | -0.7736633 | -0.0840674 |
| C | 3.7929218 | -1.1430327 | -0.3913862 |
| O | 4.8661582 | -1.0872310 | -0.9975091 |

|   |            |            |            |
|---|------------|------------|------------|
| C | 0.0711653  | 1.2554017  | -0.4380294 |
| C | -1.2708441 | 0.7724919  | -0.4154446 |
| C | -1.7901615 | 0.1672104  | -1.5950889 |
| C | -3.0402039 | -0.4156899 | -1.6224916 |
| C | -3.8471975 | -0.4179454 | -0.4679507 |
| C | -3.3640735 | 0.1869292  | 0.7068942  |
| C | -2.1114616 | 0.7691122  | 0.7323079  |
| C | 3.6687759  | -1.9653159 | 0.8984878  |
| C | 0.4287914  | -1.8723446 | -0.0719006 |
| S | 0.5907725  | 2.3293664  | 0.8174653  |
| C | 2.3803895  | 2.3959976  | 0.6116739  |
| C | 0.1798131  | 4.0214321  | 0.2940242  |
| C | -5.1426528 | -1.0162239 | -0.4922376 |
| N | -6.1969332 | -1.5043472 | -0.5124281 |
| C | 2.6550129  | -3.1364218 | 0.7061484  |
| C | 1.1419889  | -2.8696695 | 0.9043194  |
| H | 2.3569682  | -1.0129124 | -2.0055159 |
| H | 1.6502978  | -0.4472900 | 0.9351514  |
| H | 0.5381167  | 1.4513748  | -1.3994463 |
| H | -1.1752927 | 0.1569556  | -2.4912518 |
| H | -3.4074219 | -0.8745251 | -2.5358575 |
| H | -3.9831247 | 0.1963095  | 1.5991233  |
| H | -1.7716046 | 1.2210463  | 1.6599615  |
| H | 4.6584922  | -2.3682745 | 1.1322561  |
| H | 3.3615113  | -1.3356679 | 1.7437327  |
| H | 0.2978862  | -2.3146122 | -1.0656181 |
| H | -0.5487385 | -1.6164167 | 0.3477429  |
| H | 2.7338436  | 3.2582222  | 1.1799951  |
| H | 2.8145254  | 1.4818928  | 1.0167032  |
| H | 2.6197165  | 2.5065994  | -0.4481511 |
| H | 0.5739369  | 4.7202034  | 1.0357926  |
| H | -0.9092968 | 4.0862730  | 0.2575775  |
| H | 0.6127803  | 4.2038250  | -0.6917128 |
| H | 2.8178337  | -3.5689020 | -0.2903872 |
| H | 2.9204729  | -3.9194745 | 1.4254583  |
| H | 0.9920586  | -2.4896028 | 1.9228503  |
| H | 0.6222911  | -3.8330171 | 0.8443304  |

3\_sy\_c\_17.log

E = -1188.204376

H = -1187.838577

G = -1187.908324

NImag=0

|   |            |            |            |
|---|------------|------------|------------|
| C | -0.8627918 | 3.1722717  | -1.9779128 |
| C | -2.0432687 | 2.4133697  | -2.5405001 |
| C | -0.1125875 | 4.0856279  | -2.6984561 |
| O | 0.8940543  | 4.7371761  | -2.2494999 |
| C | -2.4776085 | 1.1952297  | -1.7053519 |
| C | -1.6076490 | -0.0463802 | -1.7900294 |
| C | -2.1698949 | -1.2852452 | -1.4530773 |
| C | -1.4158209 | -2.4493795 | -1.5174359 |
| C | -0.0811851 | -2.3738969 | -1.9331209 |
| C | 0.4898065  | -1.1465332 | -2.2861103 |
| C | -0.2747244 | 0.0128324  | -2.2093439 |
| C | -0.5088714 | 4.3587888  | -4.1567484 |
| C | -3.2584416 | 3.2937276  | -2.9252268 |
| S | -2.8014294 | 1.4229222  | 0.1290363  |
| C | -1.2214155 | 1.5402361  | 1.0006291  |
| C | -3.4747314 | 3.0790764  | 0.3505815  |
| C | 0.7092288  | -3.5743293 | -2.0038073 |
| N | 1.3447221  | -4.5408537 | -2.0595030 |

|   |            |            |            |
|---|------------|------------|------------|
| C | -1.8953746 | 4.9953613  | -4.3334620 |
| C | -3.0659554 | 4.0111812  | -4.2639288 |
| H | -0.5433964 | 2.9712498  | -0.9606202 |
| H | -1.7556216 | 1.9152147  | -3.4871559 |
| H | -3.4879455 | 0.9026360  | -2.0142877 |
| H | -3.2115946 | -1.3437166 | -1.1474864 |
| H | -1.8536585 | -3.4075414 | -1.2585035 |
| H | 1.5228922  | -1.1025146 | -2.6146931 |
| H | 0.1655265  | 0.9698857  | -2.4718577 |
| H | 0.2570829  | 5.0263199  | -4.5629864 |
| H | -0.4730731 | 3.4266786  | -4.7425392 |
| H | -3.4450731 | 4.0388959  | -2.1444202 |
| H | -4.1603207 | 2.6707878  | -3.0062443 |
| H | -1.4145281 | 1.1935628  | 2.0171496  |
| H | -0.5050561 | 0.8742503  | 0.5152029  |
| H | -0.8650220 | 2.5693986  | 1.0039664  |
| H | -3.6318280 | 3.1965896  | 1.4253173  |
| H | -4.4320823 | 3.1238348  | -0.1706019 |
| H | -2.7686384 | 3.8191871  | -0.0272182 |
| H | -2.0284700 | 5.7841730  | -3.5793953 |
| H | -1.9357279 | 5.4905356  | -5.3117246 |
| H | -2.9303962 | 3.2536955  | -5.0498216 |
| H | -3.9923308 | 4.5465938  | -4.5055121 |

3\_sy\_c\_18.log

E = -1188.218447

H = -1187.852400

G = -1187.920656

NImag=0

|   |            |            |            |
|---|------------|------------|------------|
| C | -2.2920003 | 3.8536615  | -1.9980849 |
| C | -1.6704507 | 2.5316482  | -2.3871481 |
| C | -1.8926945 | 5.0690956  | -2.5350076 |
| O | -2.4513995 | 6.1972019  | -2.3260128 |
| C | -2.1670398 | 1.4190773  | -1.4513812 |
| C | -1.5490513 | 0.0562677  | -1.6240095 |
| C | -0.1802613 | -0.1063384 | -1.8750948 |
| C | 0.3654834  | -1.3765535 | -2.0156497 |
| C | -0.4662128 | -2.4975123 | -1.9115592 |
| C | -1.8374053 | -2.3524487 | -1.6731232 |
| C | -2.3673519 | -1.0758606 | -1.5305330 |
| C | -0.7120915 | 5.0535264  | -3.5153333 |
| C | -1.9288221 | 2.1151644  | -3.8544218 |
| S | -1.9773503 | 2.0419252  | 0.3038765  |
| C | -2.0929194 | 0.5431028  | 1.3025744  |
| C | -0.2210525 | 2.4008918  | 0.4723852  |
| C | 0.0953980  | -3.8140515 | -2.0609347 |
| N | 0.5478351  | -4.8733166 | -2.1803228 |
| C | -1.0743466 | 4.3752116  | -4.8476371 |
| C | -1.0032059 | 2.8440018  | -4.8343884 |
| H | -3.2295199 | 3.8303286  | -1.4410465 |
| H | -0.5758071 | 2.5800175  | -2.2723649 |
| H | -3.2589849 | 1.3373047  | -1.5256179 |
| H | 0.4692894  | 0.7576798  | -1.9767742 |
| H | 1.4252297  | -1.5021993 | -2.2109804 |
| H | -2.4742929 | -3.2279893 | -1.6029899 |
| H | -3.4310752 | -0.9552475 | -1.3452388 |
| H | -0.4327146 | 6.0965966  | -3.6926094 |
| H | 0.1627028  | 4.5461097  | -3.0819879 |
| H | -2.9819298 | 2.3145136  | -4.0925380 |
| H | -1.7637528 | 1.0381860  | -3.9897560 |
| H | -1.9868676 | 0.8593552  | 2.3425299  |

|   |            |            |            |
|---|------------|------------|------------|
| H | -3.0848318 | 0.1135427  | 1.1496781  |
| H | -1.3091066 | -0.1664238 | 1.0323263  |
| H | -0.0637774 | 2.6587009  | 1.5220092  |
| H | 0.0074265  | 3.2607504  | -0.1587528 |
| H | 0.3747454  | 1.5269842  | 0.2038087  |
| H | -2.0809789 | 4.6984710  | -5.1485573 |
| H | -0.3891635 | 4.7283361  | -5.6283624 |
| H | 0.0315820  | 2.5503705  | -4.6027400 |
| H | -1.2085334 | 2.4748177  | -5.8466299 |

3\_sy\_c\_18\_ts1.log

E = -1188.144341  
H = -1187.782008  
G = -1187.853174

NImag=1

|   |            |            |            |
|---|------------|------------|------------|
| C | 2.8297947  | 0.3244824  | -0.6175459 |
| C | 1.6266743  | -0.3317289 | -0.5119725 |
| C | 3.8216018  | 0.0182624  | 0.4089625  |
| O | 4.9084929  | 0.5871382  | 0.5301978  |
| C | -0.3239167 | 1.1279069  | -0.8621032 |
| C | -1.4937609 | 0.4119330  | -0.4676969 |
| C | -2.0494534 | 0.4058628  | 0.8404365  |
| C | -3.1570106 | -0.3615758 | 1.1542963  |
| C | -3.7654156 | -1.1689470 | 0.1790267  |
| C | -3.2356650 | -1.1855941 | -1.1262160 |
| C | -2.1354396 | -0.4140912 | -1.4364401 |
| C | 3.5630605  | -1.3273991 | 1.1003050  |
| C | 1.2773336  | -1.4818445 | -1.3854131 |
| S | 0.2836337  | 2.5685647  | -0.1323477 |
| C | -1.0952150 | 3.6849289  | 0.2459738  |
| C | 0.8726395  | 2.2665738  | 1.5574791  |
| C | -4.9070297 | -1.9616137 | 0.5064376  |
| N | -5.8357947 | -2.6068704 | 0.7720743  |
| C | 3.3139243  | -2.4511030 | 0.0450481  |
| C | 1.8910575  | -2.6474023 | -0.5376585 |
| H | 3.2344985  | 0.5875128  | -1.5947449 |
| H | 1.2540565  | -0.4856052 | 0.5029367  |
| H | -0.0696084 | 1.1381133  | -1.9169615 |
| H | -1.6066447 | 1.0012677  | 1.6297942  |
| H | -3.5572005 | -0.3440121 | 2.1637071  |
| H | -3.7021991 | -1.8016145 | -1.8892535 |
| H | -1.7458754 | -0.4269824 | -2.4507955 |
| H | 4.4480526  | -1.5703753 | 1.6954758  |
| H | 2.7103498  | -1.2601719 | 1.7884076  |
| H | 1.7607967  | -1.4067648 | -2.3649961 |
| H | 0.2067646  | -1.6669154 | -1.5131788 |
| H | -0.6792346 | 4.5613019  | 0.7481913  |
| H | -1.5444401 | 3.9733428  | -0.7054127 |
| H | -1.8274791 | 3.1892326  | 0.8848106  |
| H | 1.3192399  | 3.2064059  | 1.8896706  |
| H | 1.6398438  | 1.4944205  | 1.5183078  |
| H | 0.0580805  | 1.9852004  | 2.2227541  |
| H | 4.0238337  | -2.3072107 | -0.7808022 |
| H | 3.5822833  | -3.4038977 | 0.5151764  |
| H | 1.2026690  | -2.8424846 | 0.2944288  |
| H | 1.9062015  | -3.5507943 | -1.1583516 |

3\_sy\_c\_19.log

E = -1188.210132  
H = -1187.844082

G = -1187.914059  
NImag=0

|   |            |            |            |
|---|------------|------------|------------|
| C | -0.8061927 | 3.2202075  | -2.3229862 |
| C | -1.9337462 | 2.3591345  | -2.8640615 |
| C | -0.5305871 | 4.5616394  | -2.5681505 |
| O | 0.3881072  | 5.2163104  | -1.9656014 |
| C | -2.2957256 | 1.2272397  | -1.8771367 |
| C | -1.4078712 | 0.0070104  | -1.8334838 |
| C | -0.0495595 | 0.0513031  | -2.1738005 |
| C | 0.7304452  | -1.0979734 | -2.1219981 |
| C | 0.1510357  | -2.3084010 | -1.7254941 |
| C | -1.2090535 | -2.3768801 | -1.4054585 |
| C | -1.9778274 | -1.2214840 | -1.4697534 |
| C | -1.3044155 | 5.3652085  | -3.6277793 |
| C | -3.2074570 | 3.1638921  | -3.1918402 |
| S | -2.4984024 | 2.0224693  | -0.1869833 |
| C | -3.6772061 | 0.9112259  | 0.6147845  |
| C | -1.0307835 | 1.6084446  | 0.7783501  |
| C | 0.9566645  | -3.4992191 | -1.6647135 |
| N | 1.6042646  | -4.4579058 | -1.6138554 |
| C | -1.8264554 | 4.5703541  | -4.8262667 |
| C | -3.1520235 | 3.8573615  | -4.5558301 |
| H | -0.1053406 | 2.7486514  | -1.6386116 |
| H | -1.6604278 | 1.8053848  | -3.7828607 |
| H | -3.3188517 | 0.8849882  | -2.0697711 |
| H | 0.4063900  | 0.9813951  | -2.4934252 |
| H | 1.7814210  | -1.0601424 | -2.3885938 |
| H | -1.6568487 | -3.3237569 | -1.1230590 |
| H | -3.0409799 | -1.2815954 | -1.2549281 |
| H | -2.1310974 | 5.9061742  | -3.1429549 |
| H | -0.5996432 | 6.1311109  | -3.9678942 |
| H | -3.3626328 | 3.9097769  | -2.4015500 |
| H | -4.0821587 | 2.5012852  | -3.1802533 |
| H | -3.8884392 | 1.3365476  | 1.5979851  |
| H | -4.5884257 | 0.8967097  | 0.0144363  |
| H | -3.2550366 | -0.0894350 | 0.7190310  |
| H | -1.2644580 | 1.8837186  | 1.8094325  |
| H | -0.1943452 | 2.2026893  | 0.4139364  |
| H | -0.8260447 | 0.5386582  | 0.7052129  |
| H | -1.9541174 | 5.2366064  | -5.6876501 |
| H | -1.0645777 | 3.8348740  | -5.1163258 |
| H | -3.3329318 | 3.1172410  | -5.3454695 |
| H | -3.9739642 | 4.5824805  | -4.6091285 |

3\_sy\_c\_1\_r.log  
E = -1188.209494  
H = -1187.843697  
G = -1187.912810  
NImag=0

|   |            |            |            |
|---|------------|------------|------------|
| C | 0.2129446  | -0.6899499 | 1.9860076  |
| C | 1.1517724  | -0.5347797 | 0.8150608  |
| C | 0.1212789  | 0.0347817  | 3.1690787  |
| O | -0.8153673 | -0.1294718 | 4.0248534  |
| C | 0.5504955  | 0.5038658  | -0.1990803 |
| C | 0.3226208  | 1.9197293  | 0.2776449  |
| C | 1.2891067  | 2.9279269  | 0.1918544  |
| C | 1.0408236  | 4.1962512  | 0.7032734  |
| C | -0.1918488 | 4.4608253  | 1.3098429  |
| C | -1.1798468 | 3.4714081  | 1.3816706  |
| C | -0.9206354 | 2.2138761  | 0.8515259  |
| C | 1.1672017  | 1.0945930  | 3.5435452  |



|   |            |            |            |
|---|------------|------------|------------|
| C | 2.6607699  | -0.4145036 | 1.0975297  |
| S | 1.5327152  | 0.5729519  | -1.7750482 |
| C | 1.4885461  | -1.1440605 | -2.3210352 |
| C | 0.3367626  | 1.3129080  | -2.9055030 |
| C | -0.4529655 | 5.7691747  | 1.8482611  |
| N | -0.6630949 | 6.8227893  | 2.2808629  |
| C | 2.6393554  | 0.6916817  | 3.4260689  |
| C | 3.1893117  | 0.6990796  | 2.0022647  |
| H | -0.6149450 | -1.3780648 | 1.8084367  |
| H | 1.0659554  | -1.4775785 | 0.2604589  |
| H | -0.4125419 | 0.0915462  | -0.5216297 |
| H | 2.2569578  | 2.7360755  | -0.2627859 |
| H | 1.7949291  | 4.9733571  | 0.6380234  |
| H | -2.1387016 | 3.6914063  | 1.8392119  |
| H | -1.6861096 | 1.4456856  | 0.8946639  |
| H | 0.9994641  | 2.0032975  | 2.9445410  |
| H | 0.9474360  | 1.3616076  | 4.5820798  |
| H | 3.2052050  | -0.3640428 | 0.1419302  |
| H | 2.9490398  | -1.3736004 | 1.5478313  |
| H | 1.7783255  | -1.1437790 | -3.3737098 |
| H | 2.2173499  | -1.7087092 | -1.7384915 |
| H | 0.4799429  | -1.5437104 | -2.1958242 |
| H | 0.7634433  | 1.2605873  | -3.9087469 |
| H | 0.2025823  | 2.3554461  | -2.6129183 |
| H | -0.6048369 | 0.7630319  | -2.8489153 |
| H | 3.2360180  | 1.3947807  | 4.0205679  |
| H | 2.7870733  | -0.3008728 | 3.8752459  |
| H | 4.2800438  | 0.5860316  | 2.0437132  |
| H | 3.0033882  | 1.6833547  | 1.5599683  |

3\_sy\_c\_1\_ts1.log

E = -1188.185890  
H = -1187.822808  
G = -1187.893969

NImag=1

|   |            |            |            |
|---|------------|------------|------------|
| C | 2.2988625  | -0.2531909 | 1.3862858  |
| C | 1.0653775  | -0.7407119 | 0.9479633  |
| C | 3.6157789  | -0.4406590 | 0.8441709  |
| O | 4.6082840  | 0.0716564  | 1.3988132  |
| C | 0.0352670  | 0.5727013  | -0.5124507 |
| C | -1.3608422 | 0.3039853  | -0.2765318 |
| C | -2.0664107 | 0.7892044  | 0.8534400  |
| C | -3.3820665 | 0.4283294  | 1.0907753  |
| C | -4.0450128 | -0.4396064 | 0.2090150  |
| C | -3.3651976 | -0.9395102 | -0.9170061 |
| C | -2.0541932 | -0.5718227 | -1.1509949 |
| C | 3.8566998  | -1.1705885 | -0.4709028 |
| C | 0.8105620  | -2.0493219 | 0.2363297  |
| S | 0.6130374  | 2.1490107  | 0.0314277  |
| C | 2.1905730  | 2.2840117  | -0.8272257 |
| C | -0.3321274 | 3.3788622  | -0.9052858 |
| C | -5.4044985 | -0.8115552 | 0.4536200  |
| N | -6.5075289 | -1.1144352 | 0.6515754  |
| C | 3.1549434  | -2.5106849 | -0.6928686 |
| C | 1.6606185  | -2.3946086 | -0.9799410 |
| H | 2.2767272  | 0.4531301  | 2.2153996  |
| H | 0.2521179  | -0.5017457 | 1.6361066  |
| H | 0.4051744  | 0.3547347  | -1.5136906 |
| H | -1.5780326 | 1.4566845  | 1.5597749  |
| H | -3.9035029 | 0.8137407  | 1.9616582  |
| H | -3.8764885 | -1.6080408 | -1.6029044 |

|   |            |            |            |
|---|------------|------------|------------|
| H | -1.5378890 | -0.9571332 | -2.0264468 |
| H | 3.5593968  | -0.4807851 | -1.2768484 |
| H | 4.9404946  | -1.2974893 | -0.5465435 |
| H | -0.2479783 | -2.0917194 | -0.0391144 |
| H | 0.9544922  | -2.8330919 | 0.9960564  |
| H | 2.5075614  | 3.3254138  | -0.7477782 |
| H | 2.9081786  | 1.6387335  | -0.3240711 |
| H | 2.0532574  | 1.9965433  | -1.8718002 |
| H | 0.0787026  | 4.3643570  | -0.6736831 |
| H | -1.3699834 | 3.3220653  | -0.5721393 |
| H | -0.2537462 | 3.1574345  | -1.9713006 |
| H | 3.6377973  | -2.9969444 | -1.5480398 |
| H | 3.3176250  | -3.1674111 | 0.1725500  |
| H | 1.2971338  | -3.3494847 | -1.3775072 |
| H | 1.5031864  | -1.6470421 | -1.7692109 |

3\_sy\_c\_1\_ts2.log

E = -1188.198829

H = -1187.834525

G = -1187.904511

NImag=1

|   |            |            |            |
|---|------------|------------|------------|
| C | -1.7225602 | 1.4354368  | -1.2126577 |
| C | -2.1055540 | 0.5118777  | -0.0775198 |
| C | -0.7268643 | 2.4270990  | -1.2936697 |
| O | -0.4339619 | 2.9908678  | -2.3871355 |
| C | -1.1157646 | -0.5360498 | -0.4874682 |
| C | 0.3601559  | -0.4692043 | -0.2391576 |
| C | 0.9039086  | -0.5973927 | 1.0444623  |
| C | 2.2789388  | -0.5495704 | 1.2406673  |
| C | 3.1224150  | -0.3813347 | 0.1366796  |
| C | 2.5970909  | -0.2822388 | -1.1580004 |
| C | 1.2211524  | -0.3406047 | -1.3367638 |
| C | 0.0386466  | 2.9054709  | -0.0612733 |
| C | -2.2099458 | 1.0047620  | 1.3695928  |
| S | -1.6151948 | -2.4531651 | 0.5091707  |
| C | -3.2414671 | -2.6772527 | -0.2403857 |
| C | -0.6238788 | -3.5236864 | -0.5550313 |
| C | 4.5466575  | -0.3253754 | 0.3315372  |
| N | 5.6933923  | -0.2807439 | 0.4879197  |
| C | -0.7870942 | 3.1577878  | 1.2032823  |
| C | -1.1299260 | 1.8957772  | 1.9901883  |
| H | -2.1993955 | 1.2004066  | -2.1625033 |
| H | -3.0954880 | 0.1077776  | -0.3157158 |
| H | -1.3480124 | -0.9410850 | -1.4735263 |
| H | 0.2531400  | -0.7425468 | 1.9013436  |
| H | 2.6978239  | -0.6443285 | 2.2370232  |
| H | 3.2610751  | -0.1655447 | -2.0080625 |
| H | 0.8040850  | -0.2638215 | -2.3366737 |
| H | 0.8381695  | 2.1845298  | 0.1691262  |
| H | 0.5342496  | 3.8306832  | -0.3707660 |
| H | -2.3574414 | 0.1271196  | 2.0154342  |
| H | -3.1511292 | 1.5685605  | 1.4085835  |
| H | -3.5092201 | -3.7347243 | -0.1938346 |
| H | -3.9612946 | -2.0953268 | 0.3376102  |
| H | -3.2251409 | -2.3368688 | -1.2797727 |
| H | -0.9806530 | -4.5507833 | -0.4573529 |
| H | 0.4124549  | -3.4636089 | -0.2170946 |
| H | -0.7019467 | -3.1919856 | -1.5942757 |
| H | -0.2065179 | 3.8162997  | 1.8601920  |
| H | -1.7049444 | 3.7042140  | 0.9452842  |
| H | -1.5004294 | 2.1850251  | 2.9814075  |

H            -0.2036409            1.3409679            2.1655394

3\_sy\_c\_2.log

E =           -1188.214634

H =           -1187.848539

G =           -1187.917953

NImag=0

|   |            |            |            |
|---|------------|------------|------------|
| C | -0.6533842 | 4.0449356  | -1.9139054 |
| C | -0.5487186 | 2.6023072  | -2.3447924 |
| C | -1.3195705 | 5.1082971  | -2.5054754 |
| O | -1.3026255 | 6.3018727  | -2.0415022 |
| C | -1.5114694 | 1.6284176  | -1.5977137 |
| C | -1.1339828 | 0.1745719  | -1.7292222 |
| C | 0.1408185  | -0.2790410 | -1.3638578 |
| C | 0.4822496  | -1.6167568 | -1.5142257 |
| C | -0.4581756 | -2.5098638 | -2.0431090 |
| C | -1.7348805 | -2.0718944 | -2.4118548 |
| C | -2.0654270 | -0.7316246 | -2.2466210 |
| C | -2.1420821 | 4.9265795  | -3.7940250 |
| C | -0.6886055 | 2.3463854  | -3.8573640 |
| S | -1.5453813 | 2.0970095  | 0.2028998  |
| C | -2.9148709 | 3.2733036  | 0.2950191  |
| C | -2.3562695 | 0.6709214  | 0.9596736  |
| C | -0.1075419 | -3.8959208 | -2.2055736 |
| N | 0.1742527  | -5.0115984 | -2.3361030 |
| C | -2.9336344 | 3.6222258  | -3.9157366 |
| C | -2.1131826 | 2.4282154  | -4.4182020 |
| H | -0.0954847 | 4.2992320  | -1.0103383 |
| H | 0.4608625  | 2.2648166  | -2.0723201 |
| H | -2.5496949 | 1.7683372  | -1.9139018 |
| H | 0.8753546  | 0.4070515  | -0.9505935 |
| H | 1.4666949  | -1.9711121 | -1.2272986 |
| H | -2.4559410 | -2.7741411 | -2.8169398 |
| H | -3.0564929 | -0.3837530 | -2.5241687 |
| H | -2.8311918 | 5.7769292  | -3.8141590 |
| H | -1.4810316 | 5.0457379  | -4.6658034 |
| H | -0.2750668 | 1.3590545  | -4.0998403 |
| H | -0.0518485 | 3.0827402  | -4.3602843 |
| H | -3.1241363 | 3.4268327  | 1.3561435  |
| H | -2.5862839 | 4.1984767  | -0.1769942 |
| H | -3.7818665 | 2.8482060  | -0.2151606 |
| H | -2.6044390 | 0.9621964  | 1.9823886  |
| H | -1.6541092 | -0.1628855 | 0.9739979  |
| H | -3.2592765 | 0.4187442  | 0.3994386  |
| H | -3.3752445 | 3.3972503  | -2.9356632 |
| H | -3.7789506 | 3.7696132  | -4.5985784 |
| H | -2.0369310 | 2.4813137  | -5.5113416 |
| H | -2.6554408 | 1.4990166  | -4.1978916 |

3\_sy\_c\_20.log

E =           -1188.208113

H =           -1187.842180

G =           -1187.912387

NImag=0

|   |            |           |            |
|---|------------|-----------|------------|
| C | -1.4409045 | 4.0010079 | -1.9512001 |
| C | -1.3057113 | 2.5667419 | -2.4107920 |
| C | -1.7816181 | 5.1422926 | -2.6676641 |
| O | -1.8693033 | 6.3060993 | -2.1415898 |
| C | -1.8134667 | 1.5524288 | -1.3455077 |
| C | -1.3409462 | 0.1385955 | -1.5850654 |

|   |            |            |            |
|---|------------|------------|------------|
| C | 0.0241080  | -0.1552904 | -1.7000402 |
| C | 0.4471068  | -1.4600636 | -1.9205480 |
| C | -0.5056693 | -2.4796740 | -2.0361012 |
| C | -1.8723442 | -2.2002645 | -1.9280896 |
| C | -2.2800019 | -0.8911480 | -1.6986133 |
| C | -2.0204306 | 5.0959531  | -4.1882698 |
| C | -2.1117478 | 2.2314170  | -3.6812755 |
| S | -1.2955819 | 2.0520459  | 0.3825932  |
| C | -2.7454818 | 2.9539482  | 0.9768506  |
| C | -1.5098174 | 0.5375848  | 1.3433262  |
| C | -0.0730179 | -3.8326269 | -2.2667207 |
| N | 0.2749545  | -4.9214831 | -2.4520070 |
| C | -1.0483532 | 4.1911929  | -4.9524217 |
| C | -1.4802652 | 2.7228164  | -4.9837087 |
| H | -1.1030191 | 4.2202863  | -0.9375942 |
| H | -0.2535317 | 2.2954607  | -2.6059189 |
| H | -2.9086265 | 1.5799474  | -1.2981319 |
| H | 0.7685847  | 0.6305505  | -1.6058905 |
| H | 1.5038017  | -1.6913624 | -2.0029794 |
| H | -2.6009550 | -2.9987902 | -2.0198118 |
| H | -3.3386977 | -0.6649666 | -1.6093524 |
| H | -3.0588091 | 4.8098108  | -4.4094213 |
| H | -1.9080293 | 6.1317529  | -4.5225442 |
| H | -3.1153441 | 2.6592749  | -3.5611734 |
| H | -2.2457203 | 1.1460021  | -3.7631630 |
| H | -2.5575291 | 3.2048401  | 2.0226917  |
| H | -2.8499520 | 3.8574850  | 0.3779182  |
| H | -3.6234552 | 2.3122408  | 0.8804436  |
| H | -1.4480537 | 0.8355885  | 2.3922872  |
| H | -0.6957269 | -0.1473893 | 1.1063591  |
| H | -2.4822651 | 0.0918935  | 1.1253985  |
| H | -0.9341024 | 4.5471348  | -5.9832262 |
| H | -0.0585480 | 4.2758798  | -4.4855904 |
| H | -0.6176766 | 2.0909153  | -5.2304803 |
| H | -2.2146526 | 2.5773713  | -5.7861756 |

3\_sy\_c\_2\_r.log

E = -1188.206945

H = -1187.840954

G = -1187.909878

NImag=0

|   |            |            |            |
|---|------------|------------|------------|
| C | 0.3701233  | -0.2259329 | -2.0428564 |
| C | -0.6938297 | -0.3394687 | -0.9802516 |
| C | 0.2893792  | 0.1816873  | -3.3657646 |
| O | 1.2728471  | 0.1181553  | -4.1862804 |
| C | -0.3673993 | 0.6215447  | 0.2232063  |
| C | -0.3132121 | 2.1072125  | -0.0486796 |
| C | -1.3891208 | 2.9787563  | 0.1528632  |
| C | -1.2924865 | 4.3212423  | -0.1933266 |
| C | -0.1013123 | 4.8032115  | -0.7468113 |
| C | 0.9961277  | 3.9532806  | -0.9258506 |
| C | 0.8866935  | 2.6164860  | -0.5638762 |
| C | -1.0134659 | 0.7390124  | -3.9674764 |
| C | -2.1524815 | -0.3409059 | -1.4647382 |
| S | -1.5176915 | 0.3114155  | 1.6387202  |
| C | -1.2701723 | -1.4444240 | 1.9649812  |
| C | -0.5985946 | 1.0320768  | 3.0146531  |
| C | 0.0026185  | 6.1897357  | -1.1162773 |
| N | 0.0858669  | 7.3060029  | -1.4137421 |
| C | -1.8320446 | 1.6661245  | -3.0660355 |
| C | -2.7452628 | 0.9322943  | -2.0801778 |

|   |            |            |            |
|---|------------|------------|------------|
| H | 1.3531790  | -0.5837061 | -1.7307985 |
| H | -0.5575643 | -1.3306456 | -0.5260118 |
| H | 0.6091805  | 0.3070159  | 0.6109388  |
| H | -2.3282814 | 2.6258896  | 0.5689600  |
| H | -2.1326717 | 4.9899424  | -0.0394879 |
| H | 1.9230658  | 4.3388367  | -1.3372269 |
| H | 1.7383722  | 1.9563634  | -0.6885546 |
| H | -0.6994332 | 1.2830540  | -4.8637959 |
| H | -1.6418337 | -0.0938703 | -4.3180882 |
| H | -2.8101987 | -0.6626187 | -0.6438331 |
| H | -2.2050154 | -1.1459388 | -2.2074287 |
| H | -1.6725759 | -1.6310688 | 2.9628728  |
| H | -1.8355206 | -2.0155015 | 1.2283027  |
| H | -0.2047399 | -1.6802721 | 1.9245578  |
| H | -1.1230132 | 0.7587728  | 3.9321587  |
| H | -0.6050339 | 2.1159852  | 2.8920840  |
| H | 0.4204809  | 0.6405561  | 3.0129649  |
| H | -1.1409405 | 2.3251634  | -2.5261248 |
| H | -2.4558353 | 2.3216704  | -3.6863261 |
| H | -3.6609238 | 0.6312451  | -2.6054519 |
| H | -3.0678300 | 1.6240028  | -1.2950224 |

3\_sy\_c\_2\_ts1.log

E = -1188.186643

H = -1187.823337

G = -1187.892858

NImag=1

|   |            |            |            |
|---|------------|------------|------------|
| C | -2.3761409 | -0.2718737 | -1.3598664 |
| C | -1.1044172 | -0.6925122 | -0.9583391 |
| C | -3.6495158 | -0.7383938 | -0.8919246 |
| O | -4.7164629 | -0.3060184 | -1.3714097 |
| C | -0.0994766 | 0.6132888  | 0.4915507  |
| C | 1.2961492  | 0.3156493  | 0.2772988  |
| C | 2.0039336  | 0.7246887  | -0.8802016 |
| C | 3.3140852  | 0.3315172  | -1.0999152 |
| C | 3.9665787  | -0.4925351 | -0.1708267 |
| C | 3.2845207  | -0.9139736 | 0.9859602  |
| C | 1.9801583  | -0.5136774 | 1.2020559  |
| C | -3.7389018 | -1.7843051 | 0.2158309  |
| C | -0.8377480 | -2.0137935 | -0.2674801 |
| S | -0.6544536 | 2.1760068  | -0.1137815 |
| C | -2.2425672 | 2.3415218  | 0.7183145  |
| C | 0.2886154  | 3.4348569  | 0.7843108  |
| C | 5.3205002  | -0.8966510 | -0.3961373 |
| N | 6.4186747  | -1.2255129 | -0.5784342 |
| C | -2.7635707 | -1.5507138 | 1.3766997  |
| C | -1.3901398 | -2.1836867 | 1.1552345  |
| H | -2.4352921 | 0.5183528  | -2.1074477 |
| H | -0.3085177 | -0.3980457 | -1.6442862 |
| H | -0.4794842 | 0.4414084  | 1.4978652  |
| H | 1.5233056  | 1.3589445  | -1.6214640 |
| H | 3.8384195  | 0.6584969  | -1.9926811 |
| H | 3.7899575  | -1.5461071 | 1.7096292  |
| H | 1.4638245  | -0.8352396 | 2.1023679  |
| H | -4.7742351 | -1.7613525 | 0.5667684  |
| H | -3.5721337 | -2.7796386 | -0.2206414 |
| H | 0.2420528  | -2.1947754 | -0.2535011 |
| H | -1.2687002 | -2.7906093 | -0.9131873 |
| H | -2.6174244 | 3.3433407  | 0.5013839  |
| H | -2.9143309 | 1.5892315  | 0.3050964  |
| H | -2.0962152 | 2.2023706  | 1.7916249  |

|   |            |            |           |
|---|------------|------------|-----------|
| H | -0.1290619 | 4.4116780  | 0.5290434 |
| H | 1.3247014  | 3.3748790  | 0.4460292 |
| H | 0.2173152  | 3.2414408  | 1.8562068 |
| H | -2.6534156 | -0.4700853 | 1.5350087 |
| H | -3.1931903 | -1.9545423 | 2.2998237 |
| H | -1.4500227 | -3.2588627 | 1.3632970 |
| H | -0.6810417 | -1.7666139 | 1.8788065 |

3\_sy\_c\_2\_ts2.log

E = -1188.191007  
H = -1187.826573  
G = -1187.896588

NImag=1

|   |            |            |            |
|---|------------|------------|------------|
| C | -1.9773889 | 1.2613649  | -0.9707461 |
| C | -2.0882741 | 0.2600132  | 0.1553776  |
| C | -1.5579040 | 2.6085108  | -0.9709587 |
| O | -1.6227828 | 3.3195115  | -2.0119212 |
| C | -1.0341942 | -0.6154778 | -0.4426210 |
| C | 0.4447607  | -0.4464555 | -0.2976754 |
| C | 1.1019399  | -0.6972185 | 0.9127665  |
| C | 2.4788529  | -0.5464922 | 1.0166520  |
| C | 3.2121875  | -0.1561218 | -0.1098921 |
| C | 2.5764373  | 0.0600708  | -1.3389747 |
| C | 1.1994529  | -0.0997316 | -1.4263069 |
| C | -1.0661296 | 3.3112154  | 0.2959714  |
| C | -2.0189209 | 0.7463984  | 1.6067141  |
| S | -1.2889438 | -2.6990489 | 0.4214060  |
| C | -2.9239765 | -3.0329145 | -0.2671696 |
| C | -0.2607884 | -3.5556802 | -0.7920880 |
| C | 4.6378229  | 0.0076799  | -0.0065896 |
| N | 5.7854416  | 0.1396609  | 0.0768257  |
| C | -0.1183169 | 2.5045378  | 1.1827005  |
| C | -0.8176107 | 1.5453106  | 2.1480462  |
| H | -2.4057979 | 0.9304087  | -1.9144407 |
| H | -3.0458474 | -0.2696493 | 0.0702680  |
| H | -1.3174460 | -0.9840920 | -1.4293524 |
| H | 0.5383704  | -1.0157486 | 1.7839608  |
| H | 2.9850264  | -0.7331517 | 1.9580207  |
| H | 3.1566234  | 0.3471099  | -2.2096269 |
| H | 0.6961761  | 0.0685539  | -2.3738663 |
| H | -0.5710110 | 4.2233412  | -0.0499585 |
| H | -1.9428657 | 3.6314562  | 0.8783412  |
| H | -2.1717367 | -0.1238437 | 2.2588262  |
| H | -2.9184225 | 1.3631108  | 1.7234427  |
| H | -3.0627677 | -4.1134517 | -0.3434995 |
| H | -3.6687332 | -2.6197148 | 0.4148705  |
| H | -3.0183796 | -2.5718240 | -1.2543878 |
| H | -0.5036164 | -4.6200231 | -0.7786154 |
| H | 0.7834701  | -3.4163138 | -0.5058005 |
| H | -0.4354490 | -3.1407907 | -1.7890042 |
| H | 0.5870585  | 1.9621654  | 0.5422867  |
| H | 0.4872215  | 3.1965403  | 1.7800628  |
| H | -1.1997939 | 2.1326068  | 2.9926762  |
| H | -0.0708221 | 0.8709429  | 2.5755826  |

3\_sy\_c\_3.log

E = -1188.213514  
H = -1187.847375  
G = -1187.915601

NImag=0

|   |            |            |            |
|---|------------|------------|------------|
| C | -0.8171097 | 4.0719919  | -1.8001545 |
| C | -0.4709424 | 2.6321469  | -2.0920654 |
| C | -1.8988917 | 4.7955890  | -2.2758740 |
| O | -2.2693900 | 5.9216194  | -1.7915599 |
| C | -1.5314115 | 1.6210653  | -1.5711679 |
| C | -1.1934301 | 0.1559204  | -1.7620083 |
| C | -2.1563760 | -0.7059799 | -2.2974944 |
| C | -1.8743162 | -2.0528901 | -2.4930715 |
| C | -0.6119654 | -2.5432486 | -2.1409626 |
| C | 0.3622347  | -1.6942234 | -1.6016241 |
| C | 0.0671314  | -0.3491632 | -1.4183139 |
| C | -2.7588109 | 4.2546260  | -3.4281720 |
| C | -0.1737019 | 2.3000633  | -3.5731567 |
| S | -1.9783979 | 1.7888131  | 0.2250731  |
| C | -0.4657884 | 2.2560274  | 1.0828805  |
| C | -2.9914317 | 3.2768851  | 0.3792084  |
| C | -0.3101697 | -3.9363570 | -2.3380097 |
| N | -0.0673462 | -5.0576289 | -2.4960846 |
| C | -2.0177829 | 3.7433606  | -4.6685543 |
| C | -1.3624740 | 2.3677415  | -4.5325259 |
| H | -0.2900075 | 4.5286964  | -0.9624963 |
| H | 0.4579435  | 2.4119065  | -1.5499179 |
| H | -2.5038819 | 1.8185745  | -2.0354123 |
| H | -3.1351012 | -0.3181721 | -2.5672596 |
| H | -2.6202670 | -2.7196129 | -2.9126873 |
| H | 1.3386359  | -2.0860187 | -1.3366673 |
| H | 0.8333621  | 0.3081402  | -1.0173488 |
| H | -3.4224803 | 3.4602018  | -3.0508790 |
| H | -3.4122908 | 5.0837390  | -3.7177745 |
| H | 0.2717843  | 1.2999715  | -3.6431318 |
| H | 0.5939487  | 3.0104636  | -3.9033003 |
| H | -0.7417500 | 2.3877155  | 2.1315426  |
| H | 0.2423771  | 1.4305199  | 0.9945266  |
| H | -0.0644877 | 3.1796753  | 0.6670331  |
| H | -3.3433659 | 3.2873216  | 1.4135624  |
| H | -3.8408946 | 3.1530643  | -0.2964357 |
| H | -2.4202009 | 4.1684191  | 0.1242489  |
| H | -2.7351761 | 3.6913887  | -5.4970599 |
| H | -1.2564854 | 4.4801053  | -4.9617556 |
| H | -1.0102789 | 2.0495571  | -5.5214323 |
| H | -2.1280131 | 1.6344847  | -4.2383174 |

3\_sy\_c\_3\_r.log

E = -1188.203491

H = -1187.837489

G = -1187.905974

NImag=0

|   |            |            |            |
|---|------------|------------|------------|
| C | 2.3226873  | -0.7158489 | 0.2581882  |
| C | 0.9932924  | -0.4686705 | 0.9335445  |
| C | 2.8598193  | -1.7929363 | -0.4394685 |
| O | 3.9433322  | -1.7029166 | -1.1168167 |
| C | 0.0292846  | 0.2357664  | -0.0928028 |
| C | -0.8474553 | -0.6739920 | -0.9134293 |
| C | -0.3341384 | -1.1643526 | -2.1196018 |
| C | -1.0510869 | -2.0881942 | -2.8705692 |
| C | -2.3087719 | -2.5067908 | -2.4215679 |
| C | -2.8480643 | -2.0027892 | -1.2317561 |
| C | -2.1119141 | -1.0934323 | -0.4838250 |
| C | 2.2191076  | -3.1851058 | -0.4598121 |
| C | 0.3298525  | -1.6086531 | 1.7286609  |
| S | -1.0136591 | 1.6198358  | 0.6099397  |

|   |            |            |            |
|---|------------|------------|------------|
| C | -1.3802398 | 1.2568733  | 2.3402062  |
| C | 0.2430926  | 2.8974300  | 0.8107584  |
| C | -3.0628930 | -3.4554929 | -3.1969764 |
| N | -3.6703052 | -4.2192183 | -3.8207692 |
| C | 1.5336498  | -3.6898159 | 0.8066384  |
| C | 0.2056480  | -3.0062317 | 1.1144604  |
| H | 2.8926733  | 0.2065584  | 0.1203078  |
| H | 1.1950172  | 0.3068453  | 1.6851388  |
| H | 0.6541960  | 0.8240860  | -0.7718131 |
| H | 0.6381432  | -0.8269300 | -2.4668475 |
| H | -0.6478535 | -2.4762880 | -3.8001486 |
| H | -3.8274070 | -2.3277522 | -0.8968836 |
| H | -2.5347638 | -0.7357713 | 0.4515629  |
| H | 1.4984023  | -3.2240161 | -1.2915720 |
| H | 3.0317282  | -3.8679452 | -0.7293197 |
| H | -0.6711642 | -1.2857948 | 2.0413862  |
| H | 0.9120862  | -1.7131191 | 2.6540179  |
| H | -1.8023353 | 2.1793959  | 2.7454027  |
| H | -2.1285402 | 0.4656203  | 2.3850338  |
| H | -0.4718845 | 0.9849518  | 2.8791958  |
| H | -0.2272526 | 3.7298961  | 1.3371924  |
| H | 0.5518723  | 3.2126320  | -0.1869645 |
| H | 1.0881807  | 2.5062169  | 1.3802856  |
| H | 1.3466111  | -4.7639756 | 0.6837208  |
| H | 2.2122715  | -3.5872924 | 1.6655865  |
| H | -0.3496614 | -3.6155859 | 1.8388882  |
| H | -0.3993645 | -2.9933789 | 0.2000916  |

3\_sy\_c\_3\_ts1.log

E = -1188.180471

H = -1187.817205

G = -1187.887217

NImag=1

|   |            |            |            |
|---|------------|------------|------------|
| C | 2.6767689  | -0.0751726 | 0.9874888  |
| C | 1.3082383  | -0.2822924 | 1.1595895  |
| C | 3.6408697  | -0.7945592 | 0.2001658  |
| O | 4.8367940  | -0.4430079 | 0.1931134  |
| C | 0.1415649  | 0.6941111  | -0.4658206 |
| C | -1.2723903 | 0.4096053  | -0.3617727 |
| C | -1.8479639 | -0.6540456 | -1.1022243 |
| C | -3.1751099 | -1.0067533 | -0.9487324 |
| C | -3.9922701 | -0.2976338 | -0.0489566 |
| C | -3.4513402 | 0.7679040  | 0.6872228  |
| C | -2.1171290 | 1.1072844  | 0.5365296  |
| C | 3.2472899  | -1.9500293 | -0.7078915 |
| C | 0.5935364  | -1.6146449 | 1.1483038  |
| S | 0.5109063  | 2.4309189  | -0.4943799 |
| C | 1.1021874  | 2.9877079  | 1.1294573  |
| C | 2.0564278  | 2.4656172  | -1.4218000 |
| C | -5.3672670 | -0.6579852 | 0.1118276  |
| N | -6.4830299 | -0.9507395 | 0.2418883  |
| C | 2.3273751  | -3.0219223 | -0.1214167 |
| C | 0.8711012  | -2.5828115 | 0.0044119  |
| H | 3.1045912  | 0.8186682  | 1.4367758  |
| H | 0.8538804  | 0.3945572  | 1.8841439  |
| H | 0.6666415  | 0.2243562  | -1.2954946 |
| H | -1.2351293 | -1.1918533 | -1.8192112 |
| H | -3.5957102 | -1.8204586 | -1.5317400 |
| H | -4.0790345 | 1.3173305  | 1.3821987  |
| H | -1.7214406 | 1.9179618  | 1.1431194  |
| H | 2.7637827  | -1.5161946 | -1.5967862 |



|   |            |            |            |
|---|------------|------------|------------|
| H | 4.1857785  | -2.4001024 | -1.0440098 |
| H | -0.4836077 | -1.4338116 | 1.2179559  |
| H | 0.8770199  | -2.1034233 | 2.0933033  |
| H | 1.2847492  | 4.0595559  | 1.0238948  |
| H | 0.3035617  | 2.8242135  | 1.8543104  |
| H | 2.0134753  | 2.4699289  | 1.4204434  |
| H | 2.4465771  | 3.4839224  | -1.3758983 |
| H | 1.8265012  | 2.1960890  | -2.4535666 |
| H | 2.7541898  | 1.7550010  | -0.9745443 |
| H | 2.3714534  | -3.8944274 | -0.7828673 |
| H | 2.7078270  | -3.3500733 | 0.8555461  |
| H | 0.2382778  | -3.4651555 | 0.1576605  |
| H | 0.5594388  | -2.1369759 | -0.9479999 |

3\_sy\_c\_3\_ts2.log

E = -1188.194080

H = -1187.829485

G = -1187.898993

NImag=1

|   |            |            |            |
|---|------------|------------|------------|
| C | -1.2971809 | 1.8641373  | -1.0797521 |
| C | -1.8316405 | 0.8905648  | -0.0508650 |
| C | -0.1094451 | 2.6170149  | -1.1129453 |
| O | 0.2539258  | 3.2426598  | -2.1522361 |
| C | -1.1139179 | -0.2974498 | -0.6375418 |
| C | 0.3261683  | -0.6060428 | -0.3688512 |
| C | 1.2535614  | -0.4910115 | -1.4109288 |
| C | 2.5997140  | -0.7581761 | -1.1944139 |
| C | 3.0178850  | -1.1699741 | 0.0767762  |
| C | 2.0967638  | -1.3250683 | 1.1202235  |
| C | 0.7563261  | -1.0454482 | 0.8880453  |
| C | 0.7978861  | 2.7604138  | 0.1076172  |
| C | -1.7599494 | 1.2292309  | 1.4460989  |
| S | -2.0902492 | -2.2273755 | -0.1231505 |
| C | -3.1576526 | -1.9363438 | 1.3047940  |
| C | -3.3271788 | -2.1439018 | -1.4350125 |
| C | 4.4093265  | -1.4520606 | 0.3102760  |
| N | 5.5294207  | -1.6792142 | 0.4979987  |
| C | 0.1025307  | 3.0319642  | 1.4428184  |
| C | -0.4878750 | 1.7861949  | 2.0939269  |
| H | -1.8377671 | 1.8504486  | -2.0251116 |
| H | -2.8975796 | 0.7462039  | -0.2652637 |
| H | -1.3794648 | -0.4399474 | -1.6842038 |
| H | 0.9189937  | -0.1689822 | -2.3927335 |
| H | 3.3213304  | -0.6526179 | -1.9976806 |
| H | 2.4307178  | -1.6617448 | 2.0959754  |
| H | 0.0393945  | -1.1710151 | 1.6961192  |
| H | 1.4204130  | 1.8578345  | 0.2064254  |
| H | 1.4777093  | 3.5834028  | -0.1329534 |
| H | -2.0718211 | 0.3490117  | 2.0190849  |
| H | -2.5477531 | 1.9795602  | 1.5953100  |
| H | -3.8466303 | -2.7805611 | 1.3831167  |
| H | -2.5329202 | -1.8950155 | 2.1983678  |
| H | -3.7172117 | -1.0070114 | 1.1798153  |
| H | -4.0780713 | -2.9175460 | -1.2637910 |
| H | -2.8211318 | -2.3300949 | -2.3839669 |
| H | -3.7946891 | -1.1555842 | -1.4426743 |
| H | 0.8425217  | 3.4550927  | 2.1326840  |
| H | -0.6753725 | 3.7966518  | 1.3098944  |
| H | -0.7546568 | 2.0206329  | 3.1320770  |
| H | 0.2971539  | 1.0260156  | 2.1495736  |

3\_sy\_c\_4.log

E = -1188.209052  
H = -1187.843014  
G = -1187.912496

NImag=0

|   |            |            |            |
|---|------------|------------|------------|
| C | -1.0097032 | 4.0770740  | -1.7179749 |
| C | -0.6539097 | 2.6406589  | -2.0266521 |
| C | -1.5405517 | 5.0645717  | -2.5352850 |
| O | -1.6639936 | 6.2894773  | -2.1759604 |
| C | -1.6678454 | 1.5686195  | -1.5337651 |
| C | -1.2519115 | 0.1282791  | -1.7631713 |
| C | -2.1774849 | -0.7752174 | -2.2980576 |
| C | -1.8284828 | -2.1009307 | -2.5242255 |
| C | -0.5350175 | -2.5293469 | -2.2039038 |
| C | 0.4011853  | -1.6400981 | -1.6638577 |
| C | 0.0382014  | -0.3162800 | -1.4473495 |
| C | -2.0289789 | 4.7678593  | -3.9641547 |
| C | -0.3709822 | 2.3653311  | -3.5208604 |
| S | -2.1226942 | 1.6421870  | 0.2675793  |
| C | -0.6274132 | 2.1180597  | 1.1528002  |
| C | -3.1798845 | 3.0890757  | 0.4799164  |
| C | -0.1609369 | -3.8997078 | -2.4337902 |
| N | 0.1404177  | -5.0026025 | -2.6181642 |
| C | -2.6365094 | 3.3874026  | -4.2150634 |
| C | -1.6033701 | 2.2750555  | -4.4272351 |
| H | -0.6948646 | 4.4381217  | -0.7386559 |
| H | 0.2864264  | 2.4247802  | -1.4997772 |
| H | -2.6486253 | 1.7327067  | -1.9935022 |
| H | -3.1796408 | -0.4346563 | -2.5444485 |
| H | -2.5455455 | -2.7988227 | -2.9435444 |
| H | 1.4010321  | -1.9844291 | -1.4212543 |
| H | 0.7746613  | 0.3693643  | -1.0389043 |
| H | -2.7759712 | 5.5405226  | -4.1740218 |
| H | -1.2010692 | 4.9458093  | -4.6675207 |
| H | 0.2070328  | 1.4395650  | -3.6259559 |
| H | 0.2778559  | 3.1776476  | -3.8661243 |
| H | -0.9145088 | 2.2042796  | 2.2031713  |
| H | 0.1024151  | 1.3145878  | 1.0406472  |
| H | -0.2424789 | 3.0653884  | 0.7776377  |
| H | -3.5562179 | 3.0370005  | 1.5040485  |
| H | -4.0074703 | 2.9893595  | -0.2254761 |
| H | -2.6189812 | 4.0027466  | 0.2963159  |
| H | -3.2962086 | 3.1434761  | -3.3719418 |
| H | -3.2844349 | 3.4285712  | -5.0989664 |
| H | -1.2515311 | 2.3072231  | -5.4659644 |
| H | -2.0911099 | 1.2989901  | -4.3035873 |

3\_sy\_c\_4\_r.log

E = -1188.199929  
H = -1187.833648  
G = -1187.902294

NImag=0

|   |            |            |            |
|---|------------|------------|------------|
| C | -2.5133803 | -0.4581821 | 0.5799957  |
| C | -1.4151274 | -0.4068479 | -0.4603115 |
| C | -3.2653475 | -1.5113526 | 1.0813145  |
| O | -4.2766671 | -1.3480689 | 1.8519193  |
| C | -0.1415227 | 0.2120853  | 0.2092274  |
| C | 0.7675932  | -0.6911999 | 1.0047827  |
| C | 0.5789617  | -0.7648655 | 2.3899045  |
| C | 1.3592850  | -1.6118688 | 3.1681511  |

|   |            |            |            |
|---|------------|------------|------------|
| C | 2.3552313  | -2.3784755 | 2.5532518  |
| C | 2.5747743  | -2.2953277 | 1.1726606  |
| C | 1.7792434  | -1.4512716 | 0.4087512  |
| C | -2.9417270 | -2.9771540 | 0.7511823  |
| C | -1.2389779 | -1.6695083 | -1.3287725 |
| S | 0.9227881  | 1.2874155  | -0.8931604 |
| C | 0.8282969  | 0.6815764  | -2.5904965 |
| C | -0.1078951 | 2.7610881  | -1.0260597 |
| C | 3.1741134  | -3.2526227 | 3.3504197  |
| N | 3.8334853  | -3.9563976 | 3.9917210  |
| C | -1.4594381 | -3.3371395 | 0.6492551  |
| C | -0.8424196 | -3.0202129 | -0.7109332 |
| H | -2.8362824 | 0.5295988  | 0.9167432  |
| H | -1.7191275 | 0.3647850  | -1.1852221 |
| H | -0.5088624 | 0.9924723  | 0.8850875  |
| H | -0.1885467 | -0.1568564 | 2.8595798  |
| H | 1.2065082  | -1.6751531 | 4.2403441  |
| H | 3.3564235  | -2.8872709 | 0.7083467  |
| H | 1.9474110  | -1.4083138 | -0.6650497 |
| H | -3.4100261 | -3.5563886 | 1.5533381  |
| H | -3.4595234 | -3.2643391 | -0.1769862 |
| H | -0.5387697 | -1.4596593 | -2.1435355 |
| H | -2.2167852 | -1.7946279 | -1.8105054 |
| H | 1.3683879  | 1.4181827  | -3.1898868 |
| H | 1.3376463  | -0.2804990 | -2.6516583 |
| H | -0.2105392 | 0.6138504  | -2.9154769 |
| H | 0.3705321  | 3.4231378  | -1.7502179 |
| H | -0.1304917 | 3.2359287  | -0.0443344 |
| H | -1.1118778 | 2.4873308  | -1.3557010 |
| H | -0.9125927 | -2.8123758 | 1.4421722  |
| H | -1.3286920 | -4.4093389 | 0.8420190  |
| H | -1.1630476 | -3.7904026 | -1.4251371 |
| H | 0.2447853  | -3.1119298 | -0.6439853 |

3\_sy\_c\_4\_ts1.log

E = -1188.177862

H = -1187.814698

G = -1187.885701

NImag=1

|   |            |            |            |
|---|------------|------------|------------|
| C | -2.5761395 | -0.0583090 | -1.1257210 |
| C | -1.2147171 | -0.3549037 | -1.0489152 |
| C | -3.6983556 | -0.8473497 | -0.6940842 |
| O | -4.8648522 | -0.4958492 | -0.9550869 |
| C | -0.0807516 | 0.6419933  | 0.5891825  |
| C | 1.3264539  | 0.3598842  | 0.3892961  |
| C | 1.9884989  | -0.6203525 | 1.1708148  |
| C | 3.3017033  | -0.9752882 | 0.9279381  |
| C | 4.0189302  | -0.3480403 | -0.1076662 |
| C | 3.3954704  | 0.6387209  | -0.8844195 |
| C | 2.0741034  | 0.9796677  | -0.6411894 |
| C | -3.5029127 | -2.1402578 | 0.0870081  |
| C | -0.6945851 | -1.7567140 | -0.8017768 |
| S | -0.4616215 | 2.3798986  | 0.6417258  |
| C | -0.9862522 | 2.9828761  | -0.9896927 |
| C | -2.0591998 | 2.3469331  | 1.4777619  |
| C | 5.3804550  | -0.7089859 | -0.3617674 |
| N | 6.4843090  | -1.0027153 | -0.5673167 |
| C | -2.3843239 | -2.0732935 | 1.1293798  |
| C | -1.0045247 | -2.3991185 | 0.5602572  |
| H | -2.8781920 | 0.8587420  | -1.6244355 |
| H | -0.5822805 | 0.2333467  | -1.7145316 |

|   |            |            |            |
|---|------------|------------|------------|
| H | -0.5285914 | 0.2035734  | 1.4798823  |
| H | 1.4581546  | -1.0874382 | 1.9948821  |
| H | 3.7891583  | -1.7238898 | 1.5450014  |
| H | 3.9467194  | 1.1267085  | -1.6823198 |
| H | 1.6137747  | 1.7280034  | -1.2795354 |
| H | -4.4659716 | -2.3572403 | 0.5574111  |
| H | -3.3062135 | -2.9545335 | -0.6254694 |
| H | 0.3884374  | -1.7702701 | -0.9612045 |
| H | -1.1264295 | -2.3829446 | -1.5941258 |
| H | -1.1901728 | 4.0471994  | -0.8507524 |
| H | -0.1595626 | 2.8629973  | -1.6898033 |
| H | -1.8757635 | 2.4647186  | -1.3371986 |
| H | -2.4691718 | 3.3578550  | 1.4482626  |
| H | -1.8861357 | 2.0408154  | 2.5104142  |
| H | -2.7116675 | 1.6406008  | 0.9599765  |
| H | -2.3800030 | -1.0711593 | 1.5782019  |
| H | -2.6003958 | -2.7733737 | 1.9436387  |
| H | -0.9149828 | -3.4856281 | 0.4399585  |
| H | -0.2443347 | -2.1083322 | 1.2905708  |

3\_sy\_c\_4\_ts2.log

E = -1188.187454

H = -1187.822719

G = -1187.891773

NImag=1

|   |            |            |            |
|---|------------|------------|------------|
| C | -1.6107874 | 1.6801944  | -0.9090400 |
| C | -1.8941309 | 0.5865141  | 0.0955995  |
| C | -0.9255590 | 2.9051128  | -0.7791644 |
| O | -0.8688964 | 3.7316471  | -1.7336875 |
| C | -1.0355919 | -0.4059473 | -0.6372223 |
| C | 0.4458233  | -0.5416478 | -0.4784223 |
| C | 1.2863035  | -0.1447064 | -1.5260733 |
| C | 2.6667707  | -0.2431601 | -1.4036288 |
| C | 3.2122671  | -0.7675089 | -0.2254691 |
| C | 2.3841073  | -1.2072766 | 0.8143424  |
| C | 1.0068135  | -1.0983221 | 0.6760286  |
| C | -0.2682773 | 3.3508522  | 0.5293193  |
| C | -1.7049638 | 0.9143431  | 1.5836079  |
| S | -1.7114359 | -2.5346986 | -0.2025623 |
| C | -2.5884830 | -2.4711804 | 1.3758351  |
| C | -3.1208331 | -2.5194207 | -1.3307946 |
| C | 4.6404199  | -0.8735630 | -0.0873779 |
| N | 5.7900000  | -0.9593664 | 0.0246627  |
| C | 0.5130109  | 2.2817663  | 1.2913493  |
| C | -0.3541404 | 1.3729969  | 2.1637684  |
| H | -2.1004124 | 1.5480565  | -1.8718376 |
| H | -2.9396140 | 0.2663250  | -0.0057818 |
| H | -1.3639365 | -0.5407013 | -1.6664280 |
| H | 0.8533320  | 0.2659503  | -2.4331999 |
| H | 3.3179175  | 0.0812482  | -2.2084073 |
| H | 2.8174872  | -1.6313283 | 1.7139591  |
| H | 0.3658111  | -1.4479658 | 1.4808342  |
| H | 0.3969150  | 4.1741815  | 0.2528507  |
| H | -1.0448038 | 3.7808285  | 1.1793848  |
| H | -2.0466700 | 0.0588354  | 2.1757510  |
| H | -2.4381652 | 1.7099026  | 1.7661568  |
| H | -3.1081039 | -3.4214104 | 1.5181434  |
| H | -1.8528743 | -2.3381234 | 2.1713019  |
| H | -3.3060823 | -1.6483829 | 1.3757954  |
| H | -3.7464493 | -3.3920640 | -1.1318766 |
| H | -2.7340073 | -2.5745913 | -2.3498625 |

|   |            |            |            |
|---|------------|------------|------------|
| H | -3.6996895 | -1.6018022 | -1.1970762 |
| H | 1.0935041  | 1.6901548  | 0.5744155  |
| H | 1.2464713  | 2.7723141  | 1.9423642  |
| H | -0.5951345 | 1.9160751  | 3.0866945  |
| H | 0.2397275  | 0.5106309  | 2.4783488  |

3\_sy\_c\_5.log

E = -1188.212430

H = -1187.846127

G = -1187.914097

NImag=0

|   |            |            |            |
|---|------------|------------|------------|
| C | -0.4401880 | 3.3276993  | -2.5274680 |
| C | -1.2159756 | 2.3003968  | -3.3185016 |
| C | -0.8235714 | 4.5322876  | -1.9480683 |
| O | -0.1278160 | 5.0924101  | -1.0275090 |
| C | -2.0202551 | 1.2960289  | -2.4135732 |
| C | -1.3489093 | -0.0229054 | -2.1317859 |
| C | 0.0242449  | -0.1021037 | -1.8595936 |
| C | 0.6275268  | -1.3293589 | -1.6168525 |
| C | -0.1481760 | -2.4948536 | -1.6524008 |
| C | -1.5179747 | -2.4357032 | -1.9291294 |
| C | -2.1078347 | -1.1994047 | -2.1656882 |
| C | -2.1119238 | 5.2853064  | -2.3035273 |
| C | -2.1188836 | 2.7946321  | -4.4585071 |
| S | -2.5254753 | 2.1666675  | -0.8482080 |
| C | -3.6217709 | 0.9404737  | -0.1019859 |
| C | -1.1590386 | 2.1226729  | 0.3279808  |
| C | 0.4727916  | -3.7698124 | -1.4082939 |
| N | 0.9717507  | -4.7961475 | -1.2112847 |
| C | -2.7166424 | 5.1604130  | -3.7001596 |
| C | -3.2294308 | 3.7719625  | -4.0809763 |
| H | 0.5021741  | 2.9517876  | -2.1255347 |
| H | -0.4732076 | 1.6585352  | -3.8075128 |
| H | -3.0076476 | 1.0906178  | -2.8473762 |
| H | 0.6303548  | 0.7986808  | -1.8386158 |
| H | 1.6899340  | -1.3897718 | -1.4055915 |
| H | -2.1078370 | -3.3455880 | -1.9622020 |
| H | -3.1701339 | -1.1476015 | -2.3883083 |
| H | -2.8740046 | 5.0113207  | -1.5585284 |
| H | -1.8809590 | 6.3393779  | -2.1135448 |
| H | -2.5609627 | 1.9140615  | -4.9429185 |
| H | -1.4750471 | 3.2750011  | -5.2062810 |
| H | -4.0115164 | 1.3829789  | 0.8168162  |
| H | -4.4424875 | 0.7525446  | -0.7967704 |
| H | -3.0750692 | 0.0220275  | 0.1193610  |
| H | -1.6123860 | 2.3009943  | 1.3066626  |
| H | -0.4767374 | 2.9349201  | 0.0680364  |
| H | -0.6754541 | 1.1442682  | 0.3150292  |
| H | -3.5511834 | 5.8699382  | -3.7603638 |
| H | -1.9816531 | 5.4832607  | -4.4509930 |
| H | -3.9017626 | 3.8672239  | -4.9419487 |
| H | -3.8438615 | 3.3658610  | -3.2624829 |

3\_sy\_c\_5\_r.log

E = -1188.202315

H = -1187.836149

G = -1187.906217

NImag=0

|   |            |           |            |
|---|------------|-----------|------------|
| C | -0.1923234 | 0.9644775 | -1.9907904 |
| C | 0.9416909  | 0.9405923 | -0.9917963 |

|   |            |            |            |
|---|------------|------------|------------|
| C | -0.6831233 | -0.0358499 | -2.8226097 |
| O | -1.7686878 | 0.0699727  | -3.4904348 |
| C | 0.3669652  | 0.4497045  | 0.3778152  |
| C | -0.0961013 | -0.9754453 | 0.5369993  |
| C | 0.7743118  | -2.0664138 | 0.6421046  |
| C | 0.2823175  | -3.3632803 | 0.7269315  |
| C | -1.1003778 | -3.5767977 | 0.6981698  |
| C | -1.9873535 | -2.4991360 | 0.6011579  |
| C | -1.4780055 | -1.2080046 | 0.5344286  |
| C | 0.0765934  | -1.3544833 | -3.0131418 |
| C | 2.3085892  | 0.3852886  | -1.4375589 |
| S | 1.3992155  | 1.0845922  | 1.8109770  |
| C | 0.2089225  | 0.9773059  | 3.1619153  |
| C | 2.6022111  | -0.1381379 | 2.3710934  |
| C | -1.6152541 | -4.9183637 | 0.7757486  |
| N | -2.0297020 | -5.9978231 | 0.8397776  |
| C | 1.5734508  | -1.2392145 | -3.3133520 |
| C | 2.4413641  | -0.9979691 | -2.0816421 |
| H | -0.8433025 | 1.8357874  | -1.8980755 |
| H | 1.1606329  | 1.9962035  | -0.7769776 |
| H | -0.5042671 | 1.0930940  | 0.5485412  |
| H | 1.8474629  | -1.9205907 | 0.6409294  |
| H | 0.9622511  | -4.2049520 | 0.8057589  |
| H | -3.0580619 | -2.6729607 | 0.5833039  |
| H | -2.1621645 | -0.3671649 | 0.4647778  |
| H | -0.0615575 | -1.9906147 | -2.1244780 |
| H | -0.4257763 | -1.8623310 | -3.8424193 |
| H | 3.0080054  | 0.4401210  | -0.5901913 |
| H | 2.6817862  | 1.1134849  | -2.1699088 |
| H | 0.7323321  | 1.2549653  | 4.0788213  |
| H | -0.5920189 | 1.6895319  | 2.9584358  |
| H | -0.1759649 | -0.0425435 | 3.2291616  |
| H | 3.1402960  | 0.3456594  | 3.1897136  |
| H | 3.2965847  | -0.3575930 | 1.5596251  |
| H | 2.0962883  | -1.0356966 | 2.7279381  |
| H | 1.9075333  | -2.1750730 | -3.7783817 |
| H | 1.7407047  | -0.4443643 | -4.0540593 |
| H | 3.4960664  | -1.1101423 | -2.3637636 |
| H | 2.2366365  | -1.7958800 | -1.3626860 |

3\_sy\_c\_5\_ts1.log

E = -1188.183749

H = -1187.820370

G = -1187.891186

NImag=1

|   |            |            |            |
|---|------------|------------|------------|
| C | 2.6500960  | 0.1297860  | 1.1500611  |
| C | 1.4125300  | -0.4969083 | 0.9894948  |
| C | 3.8698646  | -0.0433624 | 0.4124289  |
| O | 4.8944277  | 0.5997954  | 0.7124728  |
| C | 0.2105878  | 0.4872633  | -0.5750365 |
| C | -1.1839952 | 0.1312675  | -0.4731388 |
| C | -2.0961215 | 0.7246840  | 0.4329546  |
| C | -3.4015596 | 0.2732452  | 0.5418887  |
| C | -3.8458571 | -0.8000931 | -0.2449290 |
| C | -2.9572653 | -1.4153593 | -1.1453996 |
| C | -1.6598324 | -0.9539657 | -1.2548011 |
| C | 3.9455083  | -0.9575739 | -0.8029916 |
| C | 1.1621154  | -1.9225949 | 0.5501454  |
| S | 0.7842776  | 2.1358075  | -0.4450106 |
| C | -0.3507473 | 3.1997003  | -1.3689490 |
| C | 0.4944474  | 2.7663502  | 1.2343340  |

|   |            |            |            |
|---|------------|------------|------------|
| C | -5.1934688 | -1.2669727 | -0.1307621 |
| N | -6.2865242 | -1.6466520 | -0.0388775 |
| C | 3.3912193  | -2.3757585 | -0.6455875 |
| C | 1.8679172  | -2.4580485 | -0.6904099 |
| H | 2.6957119  | 0.9563052  | 1.8582997  |
| H | 0.6758853  | -0.1978354 | 1.7372342  |
| H | 0.7378148  | 0.0584507  | -1.4247445 |
| H | -1.7831236 | 1.5423044  | 1.0726140  |
| H | -4.0830543 | 0.7460716  | 1.2424692  |
| H | -3.2971546 | -2.2449374 | -1.7577561 |
| H | -0.9818315 | -1.4303623 | -1.9584592 |
| H | 3.4126023  | -0.4570360 | -1.6258631 |
| H | 5.0019719  | -0.9964187 | -1.0832425 |
| H | 0.0820854  | -2.0638297 | 0.4384688  |
| H | 1.4572693  | -2.5419147 | 1.4111868  |
| H | -0.0383470 | 4.2338166  | -1.2062706 |
| H | -0.2541631 | 2.9387063  | -2.4238447 |
| H | -1.3745938 | 3.0468887  | -1.0227428 |
| H | 1.2577099  | 3.5246539  | 1.4177720  |
| H | 0.6048356  | 1.9497623  | 1.9466032  |
| H | -0.4987965 | 3.2108247  | 1.3009189  |
| H | 3.7949800  | -2.9836722 | -1.4629416 |
| H | 3.7625650  | -2.8205537 | 0.2878501  |
| H | 1.5679891  | -3.5058573 | -0.8102429 |
| H | 1.5104189  | -1.9312244 | -1.5849970 |

3\_sy\_c\_6.log

E = -1188.212155

H = -1187.846400

G = -1187.916524

NImag=0

|   |            |            |            |
|---|------------|------------|------------|
| C | -0.7409501 | 3.2236751  | -2.1953016 |
| C | -2.0161925 | 2.4434814  | -2.4261520 |
| C | -0.1530971 | 4.0450102  | -3.1447627 |
| O | 0.9001422  | 4.7464776  | -2.9672014 |
| C | -2.2606737 | 1.3494080  | -1.3583288 |
| C | -1.4579414 | 0.0848512  | -1.5688383 |
| C | -2.1441348 | -1.0949522 | -1.8777324 |
| C | -1.4528134 | -2.2766487 | -2.1159687 |
| C | -0.0556977 | -2.2773824 | -2.0332601 |
| C | 0.6441653  | -1.1082928 | -1.7136990 |
| C | -0.0596167 | 0.0676598  | -1.4810043 |
| C | -0.8258946 | 4.1508858  | -4.5203513 |
| C | -3.2795730 | 3.3093186  | -2.6498791 |
| S | -1.8969951 | 1.9156923  | 0.3713332  |
| C | -3.0904952 | 3.2341993  | 0.6635212  |
| C | -2.6583346 | 0.5745373  | 1.3072167  |
| C | 0.6700593  | -3.4968764 | -2.2710351 |
| N | 1.2534496  | -4.4787902 | -2.4625565 |
| C | -2.2122026 | 4.8123186  | -4.4841061 |
| C | -3.3548515 | 3.8809508  | -4.0687312 |
| H | -0.2541428 | 3.1752016  | -1.2220653 |
| H | -1.9276718 | 1.8349892  | -3.3448259 |
| H | -3.3246289 | 1.0914516  | -1.3271728 |
| H | -3.2288838 | -1.0872177 | -1.9339100 |
| H | -1.9853048 | -3.1902006 | -2.3587221 |
| H | 1.7269478  | -1.1235279 | -1.6471952 |
| H | 0.4864456  | 0.9718446  | -1.2328227 |
| H | -0.1515297 | 4.7387074  | -5.1503610 |
| H | -0.9218282 | 3.1561431  | -4.9815395 |
| H | -3.3039494 | 4.1331142  | -1.9273861 |

|   |            |            |            |
|---|------------|------------|------------|
| H | -4.1806546 | 2.7015594  | -2.4876754 |
| H | -3.1521016 | 3.3603796  | 1.7467033  |
| H | -2.7013355 | 4.1443707  | 0.2067302  |
| H | -4.0610200 | 2.9547277  | 0.2490417  |
| H | -2.6414171 | 0.8686740  | 2.3581965  |
| H | -2.0512679 | -0.3209188 | 1.1650703  |
| H | -3.6818350 | 0.4180428  | 0.9599477  |
| H | -2.1785112 | 5.6822884  | -3.8129051 |
| H | -2.4475472 | 5.1996216  | -5.4832492 |
| H | -3.3926260 | 3.0421174  | -4.7791106 |
| H | -4.3046904 | 4.4193084  | -4.1742113 |

3\_sy\_c\_6\_ts1.log

E = -1188.149506

H = -1187.787452

G = -1187.859207

NImag=1

|   |            |            |            |
|---|------------|------------|------------|
| C | -1.8520451 | -0.3433011 | -0.9093928 |
| C | -1.5390815 | -0.1133239 | 0.4055291  |
| C | -1.7461555 | -1.7322318 | -1.3586438 |
| O | -1.8625423 | -2.1062332 | -2.5257796 |
| C | 0.1857622  | 1.6534136  | 0.6870860  |
| C | 1.2480150  | 0.7458130  | 0.4323779  |
| C | 1.9060535  | 0.1284490  | 1.5371658  |
| C | 2.8650060  | -0.8449722 | 1.3598569  |
| C | 3.2239281  | -1.2611391 | 0.0601695  |
| C | 2.5888978  | -0.6723908 | -1.0460106 |
| C | 1.6257468  | 0.3050809  | -0.8678030 |
| C | -1.8495480 | -2.7354739 | -0.1999801 |
| C | -2.5775027 | 0.1336511  | 1.4448130  |
| S | -0.3652026 | 2.6942886  | -0.5777642 |
| C | -1.9968973 | 3.2150188  | -0.0184966 |
| C | 0.5220570  | 4.2672353  | -0.3914547 |
| C | 4.2215050  | -2.2635660 | -0.1287915 |
| N | 5.0337996  | -3.0805505 | -0.2813155 |
| C | -3.0531473 | -2.3927756 | 0.7343315  |
| C | -2.8734343 | -1.3461415 | 1.8643127  |
| H | -2.6040606 | 0.2580538  | -1.4224268 |
| H | -0.7351164 | -0.7314494 | 0.8035717  |
| H | 0.0285059  | 2.0398513  | 1.6910499  |
| H | 1.6366611  | 0.4363132  | 2.5440362  |
| H | 3.3505973  | -1.2945240 | 2.2210826  |
| H | 2.8573930  | -0.9884856 | -2.0499565 |
| H | 1.1595661  | 0.7385857  | -1.7473809 |
| H | -1.9955661 | -3.7274695 | -0.6370532 |
| H | -0.9171974 | -2.7662533 | 0.3786714  |
| H | -3.4723143 | 0.6066710  | 1.0270541  |
| H | -2.2395517 | 0.6946716  | 2.3219991  |
| H | -2.2816817 | 4.0891577  | -0.6071052 |
| H | -2.6952761 | 2.3989509  | -0.2024168 |
| H | -1.9493836 | 3.4632662  | 1.0440155  |
| H | 0.1315930  | 4.9740499  | -1.1273609 |
| H | 1.5761237  | 4.0633619  | -0.5889648 |
| H | 0.3839468  | 4.6394527  | 0.6257090  |
| H | -3.9015974 | -2.0957004 | 0.1027287  |
| H | -3.3528795 | -3.3232476 | 1.2295006  |
| H | -2.0503340 | -1.6751299 | 2.5110414  |
| H | -3.7838412 | -1.3553062 | 2.4748439  |

3\_sy\_c\_7.log



```

E =      -1188.209216
H =      -1187.843144
G =      -1187.912247
NImag=0
C        -0.4459504      3.3497370      -2.3958017
C        -1.2014964      2.3367639      -3.2274114
C        -0.5400410      4.7372821      -2.3658727
O         0.2832558      5.4815038      -1.7278247
C        -1.9915983      1.2703021      -2.3979478
C        -1.2680750      -0.0177647      -2.0984276
C         0.1026929      -0.0379966      -1.8061425
C         0.7503380      -1.2360133      -1.5351554
C         0.0222053      -2.4322967      -1.5608029
C        -1.3437718      -2.4325124      -1.8602269
C        -1.9779762      -1.2244488      -2.1279488
C        -1.6644902      5.4994512      -3.0917580
C        -2.1196533      2.9156722      -4.3157266
S        -2.6125656      2.0840954      -0.8471629
C        -3.9036525      0.9297191      -0.3301124
C        -1.3966215      1.7551381       0.4431785
C         0.6899905      -3.6766103      -1.2842024
N         1.2267998      -4.6781141      -1.0607001
C        -3.0682727      4.9079871      -2.9475992
C        -3.3529669      3.6925916      -3.8492677
H         0.4113640      2.9570801      -1.8473393
H        -0.4668382      1.7257758      -3.7728496
H        -2.9363774      1.0196516      -2.8963142
H         0.6732132      0.8850939      -1.7899505
H         1.8110732      -1.2501625      -1.3080210
H        -1.8960966      -3.3657783      -1.8891870
H        -3.0363637      -1.2202606      -2.3742257
H        -1.6517623      6.5033836      -2.6561601
H        -1.4082987      5.6215906      -4.1539106
H        -2.4593921      2.0855795      -4.9483074
H        -1.5075719      3.5595674      -4.9568511
H        -4.3219344      1.3202937       0.5996372
H        -4.6731282      0.9182168      -1.1043875
H        -3.4897639      -0.0676786      -0.1704814
H        -1.8195361      2.1647859       1.3634819
H        -0.4793017      2.2816086       0.1827543
H        -1.2342385      0.6804835       0.5416689
H        -3.2128893      4.6409104      -1.8952744
H        -3.8105494      5.6847872      -3.1668842
H        -3.8741017      4.0305832      -4.7530878
H        -4.0571570      3.0139018      -3.3462973

```

3\_sy\_c\_7\_ts1.log

```

E =      -1188.182986
H =      -1187.819372
G =      -1187.889490
NImag=1
C         2.6507861       0.0763725       1.1107689
C         1.3579395      -0.4353010       0.9988490
C         3.8790962      -0.4970123       0.6341785
O         4.9793926       0.0270920       0.8922363
C         0.1434208       0.5004851      -0.6007632
C        -1.2464657       0.1986351      -0.3363833
C        -1.9618166       0.7236130       0.7665581
C        -3.2641646       0.3308763       1.0343050
C        -3.8961084      -0.6170464       0.2164069
C        -3.2020800      -1.1672648      -0.8760324

```

|   |            |            |            |
|---|------------|------------|------------|
| C | -1.9078698 | -0.7617745 | -1.1429010 |
| C | 3.8754665  | -1.7786233 | -0.1914639 |
| C | 1.0427894  | -1.8768580 | 0.6570215  |
| S | 0.7668895  | 2.1346794  | -0.6107723 |
| C | -0.4042389 | 3.1699944  | -1.5248801 |
| C | 0.5892827  | 2.8981036  | 1.0252075  |
| C | -5.2405697 | -1.0234138 | 0.4940022  |
| N | -6.3304935 | -1.3530948 | 0.7179739  |
| C | 2.7744189  | -1.8324272 | -1.2564282 |
| C | 1.4490552  | -2.3869011 | -0.7346046 |
| H | 2.7835132  | 1.0199510  | 1.6383349  |
| H | 0.6337084  | 0.0006658  | 1.6877359  |
| H | 0.5571425  | 0.0316305  | -1.4912445 |
| H | -1.4911693 | 1.4311383  | 1.4398439  |
| H | -3.7942810 | 0.7476690  | 1.8852379  |
| H | -3.6899533 | -1.8986811 | -1.5130084 |
| H | -1.3855385 | -1.1789384 | -1.9994585 |
| H | 4.8659778  | -1.8443443 | -0.6498144 |
| H | 3.7819681  | -2.6366840 | 0.4898581  |
| H | -0.0304847 | -2.0446447 | 0.7957946  |
| H | 1.5473654  | -2.4848306 | 1.4202044  |
| H | -0.0645733 | 4.2057451  | -1.4492694 |
| H | -0.3865882 | 2.8417986  | -2.5651497 |
| H | -1.4030091 | 3.0572773  | -1.0978276 |
| H | 1.2843161  | 3.7399517  | 1.0435651  |
| H | 0.8645731  | 2.1776579  | 1.7942241  |
| H | -0.4318715 | 3.2533570  | 1.1648464  |
| H | 2.6274060  | -0.8226023 | -1.6608679 |
| H | 3.1081180  | -2.4533096 | -2.0947976 |
| H | 1.5145611  | -3.4801978 | -0.6793633 |
| H | 0.6564416  | -2.1626586 | -1.4565468 |

3\_sy\_c\_8.log

E = -1188.218091

H = -1187.851820

G = -1187.920458

NImag=0

|   |            |            |            |
|---|------------|------------|------------|
| C | -0.8766609 | 4.1551341  | -1.9057207 |
| C | -0.5535559 | 2.7194683  | -2.2540154 |
| C | -1.9088944 | 4.9406488  | -2.4005518 |
| O | -2.1444508 | 6.1404524  | -2.0287760 |
| C | -1.5856944 | 1.6981544  | -1.6994919 |
| C | -1.2057913 | 0.2423767  | -1.7793698 |
| C | 0.0818607  | -0.2042547 | -1.4523442 |
| C | 0.4031240  | -1.5537175 | -1.5330911 |
| C | -0.5699566 | -2.4684616 | -1.9528590 |
| C | -1.8573224 | -2.0387589 | -2.2936457 |
| C | -2.1647159 | -0.6867058 | -2.2021611 |
| C | -2.8547885 | 4.3794849  | -3.4759310 |
| C | -0.3114630 | 2.4106365  | -3.7487072 |
| S | -2.0320707 | 2.2301048  | 0.0233230  |
| C | -2.8353263 | 0.7657699  | 0.7107339  |
| C | -0.4828360 | 2.1963070  | 0.9413029  |
| C | -0.2394808 | -3.8662151 | -2.0419329 |
| N | 0.0260742  | -4.9911898 | -2.1128323 |
| C | -2.1822308 | 3.8821695  | -4.7616816 |
| C | -1.5280272 | 2.5021768  | -4.6706711 |
| H | -0.2394755 | 4.6208551  | -1.1538149 |
| H | 0.3968050  | 2.4922444  | -1.7550778 |
| H | -2.5520377 | 1.8371642  | -2.1950642 |
| H | 0.8503778  | 0.4981883  | -1.1452433 |

|   |            |            |            |
|---|------------|------------|------------|
| H | 1.3999663  | -1.8990292 | -1.2798844 |
| H | -2.6019406 | -2.7554522 | -2.6238025 |
| H | -3.1630428 | -0.3460562 | -2.4635880 |
| H | -3.4744144 | 3.5713787  | -3.0583065 |
| H | -3.5384503 | 5.1978831  | -3.7215795 |
| H | 0.1184054  | 1.4046556  | -3.8429667 |
| H | 0.4553138  | 3.1144645  | -4.0949241 |
| H | -3.1251334 | 1.0231798  | 1.7316336  |
| H | -3.7285290 | 0.5648419  | 0.1155141  |
| H | -2.1578277 | -0.0899132 | 0.7052033  |
| H | -0.7407306 | 2.4112575  | 1.9807136  |
| H | 0.1626136  | 2.9831434  | 0.5504089  |
| H | -0.0159915 | 1.2133289  | 0.8626397  |
| H | -2.9396633 | 3.8416212  | -5.5543730 |
| H | -1.4333017 | 4.6198109  | -5.0838885 |
| H | -1.2076533 | 2.1999784  | -5.6752940 |
| H | -2.2875831 | 1.7670741  | -4.3659829 |

3\_sy\_c\_9.log

E = -1188.210105

H = -1187.844119

G = -1187.913570

NImag=0

|   |            |            |            |
|---|------------|------------|------------|
| C | -0.7191121 | 3.2443336  | -2.2056684 |
| C | -1.8700887 | 2.3482519  | -2.6309404 |
| C | -0.4320694 | 4.5427436  | -2.6133618 |
| O | 0.5202102  | 5.2439549  | -2.1260394 |
| C | -2.1927553 | 1.2737079  | -1.5562340 |
| C | -1.4262138 | -0.0260536 | -1.6817353 |
| C | -0.0581995 | -0.0486031 | -1.9826686 |
| C | 0.6168873  | -1.2568801 | -2.1028790 |
| C | -0.0826967 | -2.4566163 | -1.9251675 |
| C | -1.4507350 | -2.4513247 | -1.6334311 |
| C | -2.1121940 | -1.2348146 | -1.5132209 |
| C | -1.2386256 | 5.2340487  | -3.7278720 |
| C | -3.1474570 | 3.1216980  | -3.0210904 |
| S | -1.8825938 | 1.9283446  | 0.1581902  |
| C | -3.1023204 | 3.2459768  | 0.3326038  |
| C | -2.6852561 | 0.6526129  | 1.1543024  |
| C | 0.6119173  | -3.7106466 | -2.0512531 |
| N | 1.1705293  | -4.7200491 | -2.1519573 |
| C | -1.7835032 | 4.3174604  | -4.8265077 |
| C | -3.1062118 | 3.6399142  | -4.4610659 |
| H | -0.0011029 | 2.8316604  | -1.4992748 |
| H | -1.6163420 | 1.7256707  | -3.5100173 |
| H | -3.2634377 | 1.0433204  | -1.5523342 |
| H | 0.4844594  | 0.8787595  | -2.1356478 |
| H | 1.6761512  | -1.2746581 | -2.3363112 |
| H | -1.9852781 | -3.3867051 | -1.5059001 |
| H | -3.1757338 | -1.2237338 | -1.2918419 |
| H | -2.0568536 | 5.8188065  | -3.2810908 |
| H | -0.5467600 | 5.9631503  | -4.1619600 |
| H | -3.2848132 | 3.9646387  | -2.3353052 |
| H | -4.0271271 | 2.4750697  | -2.9114796 |
| H | -3.1987937 | 3.4389918  | 1.4032019  |
| H | -2.7128272 | 4.1271910  | -0.1762410 |
| H | -4.0562376 | 2.9226261  | -0.0891406 |
| H | -2.7314727 | 1.0372727  | 2.1751701  |
| H | -2.0630378 | -0.2427135 | 1.1304863  |
| H | -3.6878266 | 0.4503471  | 0.7714858  |
| H | -1.9239492 | 4.8886407  | -5.7517660 |

|   |            |           |            |
|---|------------|-----------|------------|
| H | -1.0270422 | 3.5535339 | -5.0492674 |
| H | -3.2913766 | 2.8088070 | -5.1532813 |
| H | -3.9302106 | 4.3521647 | -4.5951883 |

3\_sy\_c\_9\_ts1.log

E = -1188.182786  
H = -1187.819260  
G = -1187.890041

NImag=1

|   |            |            |            |
|---|------------|------------|------------|
| C | -1.7500988 | -0.5377462 | -1.1630208 |
| C | -1.0260066 | -0.9143263 | -0.0219400 |
| C | -3.1623001 | -0.3245123 | -1.2745282 |
| O | -3.6783976 | 0.1612191  | -2.3025273 |
| C | 0.1450664  | 0.7005467  | 0.7903823  |
| C | 1.4976768  | 0.3363157  | 0.4416435  |
| C | 2.0781639  | 0.5995978  | -0.8227226 |
| C | 3.3359233  | 0.1202969  | -1.1491082 |
| C | 4.0575701  | -0.6510284 | -0.2249074 |
| C | 3.4954104  | -0.9380866 | 1.0314288  |
| C | 2.2414532  | -0.4524466 | 1.3532580  |
| C | -4.1038595 | -0.8312169 | -0.1798500 |
| C | -1.6835583 | -1.3465646 | 1.2719755  |
| S | -0.5150257 | 2.1052211  | -0.0391207 |
| C | -2.0703362 | 2.3304666  | 0.8351195  |
| C | 0.4046578  | 3.5330528  | 0.5877295  |
| C | 5.3589332  | -1.1430458 | -0.5607511 |
| N | 6.4142036  | -1.5425587 | -0.8323613 |
| C | -3.8403196 | -2.3013937 | 0.1844428  |
| C | -2.6295326 | -2.5447592 | 1.1134352  |
| H | -1.1899630 | -0.3620400 | -2.0808029 |
| H | -0.0795243 | -1.4143947 | -0.2253732 |
| H | -0.0862271 | 0.7313679  | 1.8549611  |
| H | 1.5415572  | 1.1859268  | -1.5645126 |
| H | 3.7659642  | 0.3386425  | -2.1218076 |
| H | 4.0510356  | -1.5357609 | 1.7475081  |
| H | 1.8161494  | -0.6731338 | 2.3285591  |
| H | -4.0510458 | -0.1991713 | 0.7153252  |
| H | -5.1151846 | -0.7256783 | -0.5822437 |
| H | -2.2353637 | -0.5092358 | 1.7118600  |
| H | -0.8991679 | -1.6073691 | 1.9905757  |
| H | -2.5115114 | 3.2639450  | 0.4820264  |
| H | -2.7182137 | 1.4926436  | 0.5816754  |
| H | -1.8757021 | 2.3698077  | 1.9089467  |
| H | -0.0612286 | 4.4351605  | 0.1844117  |
| H | 1.4293863  | 3.4491502  | 0.2207066  |
| H | 0.3819184  | 3.5302439  | 1.6788433  |
| H | -4.7395819 | -2.7067636 | 0.6604200  |
| H | -3.7132980 | -2.8595130 | -0.7501410 |
| H | -2.0570923 | -3.4088971 | 0.7573802  |
| H | -2.9864282 | -2.8040918 | 2.1167708  |

3\_sy\_c\_prod\_1.log

E = -710.326302  
H = -710.044255  
G = -710.101515

NImag=0

|   |            |            |            |
|---|------------|------------|------------|
| C | -1.2910136 | -0.1900856 | -3.9122146 |
| C | -1.2842830 | 1.2964330  | -3.6196355 |
| C | -1.9266683 | 0.3296545  | -2.6525238 |
| C | -1.4210469 | 0.0877660  | -1.2638743 |

|   |            |            |            |
|---|------------|------------|------------|
| C | -1.3431570 | -1.2132169 | -0.7497896 |
| C | -0.9684545 | -1.4379625 | 0.5679389  |
| C | -0.6631614 | -0.3448470 | 1.3907892  |
| C | -0.7410389 | 0.9624790  | 0.8977746  |
| C | -1.1237027 | 1.1675889  | -0.4236441 |
| H | -3.0149233 | 0.3203077  | -2.6938058 |
| H | -1.9567300 | -0.5196841 | -4.7070907 |
| H | -1.9704373 | 1.8950715  | -4.2134918 |
| C | 0.0461006  | 1.9727965  | -3.3439907 |
| C | 0.9218684  | 2.0773976  | -4.6038834 |
| C | 1.7114000  | 0.8049991  | -4.9259698 |
| C | 0.8623117  | -0.4504738 | -5.2161685 |
| C | 0.0603630  | -0.8368459 | -3.9925375 |
| O | 0.5176921  | -1.5696639 | -3.1337067 |
| C | -0.2715481 | -0.5689330 | 2.7558497  |
| N | 0.0435950  | -0.7496115 | 3.8561471  |
| H | -1.5688461 | -2.0549805 | -1.3957955 |
| H | -0.9073088 | -2.4469131 | 0.9629097  |
| H | -0.5084779 | 1.8023047  | 1.5444052  |
| H | -1.1957843 | 2.1811024  | -0.8076272 |
| H | 0.6016079  | 1.4299014  | -2.5675777 |
| H | -0.1469771 | 2.9736000  | -2.9418108 |
| H | 0.2943325  | 2.3518691  | -5.4627767 |
| H | 1.6426880  | 2.8914683  | -4.4690932 |
| H | 2.3886563  | 0.5827418  | -4.0911964 |
| H | 2.3398637  | 0.9877206  | -5.8039043 |
| H | 1.5222813  | -1.2827050 | -5.4773244 |
| H | 0.1873986  | -0.2495792 | -6.0556814 |

3\_sy\_c\_prod\_2.log

E = -710.325325

H = -710.043566

G = -710.101287

NImag=0

|   |            |            |            |
|---|------------|------------|------------|
| C | -1.2224686 | -0.1488308 | -3.9363757 |
| C | -1.1975354 | 1.3246657  | -3.6297027 |
| C | -1.8845304 | 0.3701489  | -2.6810969 |
| C | -1.3964404 | 0.1217979  | -1.2877351 |
| C | -1.2518366 | -1.1807216 | -0.7933698 |
| C | -0.8765622 | -1.4040588 | 0.5263503  |
| C | -0.6428993 | -0.3100570 | 1.3686750  |
| C | -0.7897517 | 0.9996625  | 0.8948673  |
| C | -1.1668907 | 1.2040243  | -0.4267891 |
| H | -2.9713036 | 0.3738563  | -2.7428280 |
| H | -1.8989453 | -0.4934396 | -4.7172143 |
| H | -1.8461250 | 1.9585810  | -4.2301679 |
| C | 0.1518125  | 1.9201806  | -3.2878889 |
| C | 1.0072379  | 2.1443144  | -4.5410124 |
| C | 1.0476335  | 0.9183980  | -5.4625056 |
| C | 1.2597969  | -0.4003866 | -4.7192743 |
| C | 0.0635192  | -0.9410174 | -3.9448303 |
| O | 0.1309021  | -2.0347972 | -3.4126998 |
| C | -0.2537738 | -0.5337227 | 2.7346813  |
| N | 0.0591494  | -0.7135562 | 3.8356715  |
| H | -1.4236931 | -2.0228441 | -1.4547884 |
| H | -0.7640184 | -2.4143722 | 0.9064388  |
| H | -0.6126759 | 1.8404912  | 1.5577099  |
| H | -1.2885956 | 2.2176664  | -0.7976558 |
| H | 0.6826221  | 1.2431635  | -2.6049515 |
| H | 0.0291302  | 2.8639592  | -2.7447438 |
| H | 0.6227925  | 3.0028979  | -5.1043857 |

|   |           |            |            |
|---|-----------|------------|------------|
| H | 2.0262615 | 2.4015772  | -4.2274093 |
| H | 1.8554312 | 1.0440982  | -6.1907755 |
| H | 0.1190483 | 0.8549999  | -6.0416688 |
| H | 2.0915073 | -0.3219900 | -4.0059438 |
| H | 1.5379011 | -1.1958892 | -5.4203809 |

3\_sy\_c\_prod\_3.log

E = -710.321169

H = -710.038860

G = -710.095727

NImag=0

|   |            |            |            |
|---|------------|------------|------------|
| C | -1.4599368 | -0.1659089 | -4.0611243 |
| C | -1.4587977 | 1.3121984  | -3.7763723 |
| C | -2.0400639 | 0.3399499  | -2.7653476 |
| C | -1.4579459 | 0.1442531  | -1.4015304 |
| C | -1.0250478 | -1.1095643 | -0.9531055 |
| C | -0.5295908 | -1.2708088 | 0.3360490  |
| C | -0.4699032 | -0.1653333 | 1.1933134  |
| C | -0.9141945 | 1.0932344  | 0.7669938  |
| C | -1.4068048 | 1.2366419  | -0.5237118 |
| H | -3.1285711 | 0.3236087  | -2.7461915 |
| H | -2.1941452 | -0.5114487 | -4.7891048 |
| H | -2.2047074 | 1.8863934  | -4.3196018 |
| C | -0.1817491 | 2.1060553  | -3.5159474 |
| C | 1.0677020  | 1.3265689  | -3.0829590 |
| C | 1.7933495  | 0.5930137  | -4.2164768 |
| C | 0.8677249  | -0.2688018 | -5.1012430 |
| C | -0.1801066 | -0.9443637 | -4.2495642 |
| O | -0.0286126 | -2.0647637 | -3.7959290 |
| C | 0.0460882  | -0.3241414 | 2.5259361  |
| N | 0.4616969  | -0.4519923 | 3.5999066  |
| H | -1.0619501 | -1.9585400 | -1.6273849 |
| H | -0.1898716 | -2.2424168 | 0.6801778  |
| H | -0.8707792 | 1.9419180  | 1.4419951  |
| H | -1.7548757 | 2.2093937  | -0.8594220 |
| H | -0.4082304 | 2.8648185  | -2.7569954 |
| H | 0.0580415  | 2.6595054  | -4.4335197 |
| H | 1.7709101  | 2.0317711  | -2.6268690 |
| H | 0.8172240  | 0.6087876  | -2.2932793 |
| H | 2.5615322  | -0.0525758 | -3.7775672 |
| H | 2.3077981  | 1.3147978  | -4.8599085 |
| H | 1.4490066  | -1.0281124 | -5.6306490 |
| H | 0.3603107  | 0.3660619  | -5.8348675 |

3\_sy\_c\_prod\_4.log

E = -710.327045

H = -710.044354

G = -710.101123

NImag=0

|   |            |            |            |
|---|------------|------------|------------|
| C | -1.4266238 | -0.1589608 | -3.9894509 |
| C | -1.4500641 | 1.3437960  | -3.7086828 |
| C | -2.0125703 | 0.3978430  | -2.6971114 |
| C | -1.4316224 | 0.1544163  | -1.3402233 |
| C | -1.1610332 | -1.1485192 | -0.9028063 |
| C | -0.6870973 | -1.3843863 | 0.3810922  |
| C | -0.4816851 | -0.3002145 | 1.2445837  |
| C | -0.7553888 | 1.0078877  | 0.8276099  |
| C | -1.2303800 | 1.2248892  | -0.4610448 |
| H | -3.0994642 | 0.3379699  | -2.6876539 |
| H | -2.1603560 | -0.5281291 | -4.6987314 |

|   |            |            |            |
|---|------------|------------|------------|
| H | -2.2030551 | 1.8498965  | -4.3064848 |
| C | -0.1754380 | 2.1652682  | -3.5427763 |
| C | 0.8837597  | 1.8289614  | -4.6041373 |
| C | 1.7977600  | 0.6644242  | -4.1917360 |
| C | 1.0915550  | -0.4357841 | -3.3739993 |
| C | -0.1524539 | -0.9269472 | -4.0765499 |
| O | -0.1080995 | -1.9246289 | -4.7848404 |
| C | 0.0123643  | -0.5346120 | 2.5747693  |
| N | 0.4099159  | -0.7238581 | 3.6463273  |
| H | -1.3176831 | -1.9856492 | -1.5782841 |
| H | -0.4747041 | -2.3940558 | 0.7172309  |
| H | -0.5972014 | 1.8389429  | 1.5072500  |
| H | -1.4487282 | 2.2371023  | -0.7897491 |
| H | 0.2549464  | 2.0491085  | -2.5421161 |
| H | -0.4629704 | 3.2174140  | -3.6289919 |
| H | 0.3722463  | 1.5902556  | -5.5449556 |
| H | 1.5066455  | 2.7068277  | -4.8034944 |
| H | 2.6164510  | 1.0461280  | -3.5721721 |
| H | 2.2519012  | 0.2166143  | -5.0821620 |
| H | 0.8469202  | -0.0455708 | -2.3835427 |
| H | 1.7608533  | -1.2903296 | -3.2450665 |

3\_sy\_c\_prod\_5.log

E = -710.325137

H = -710.042577

G = -710.099745

NImag=0

|   |            |            |            |
|---|------------|------------|------------|
| C | -1.4001697 | 0.0734630  | -3.9161775 |
| C | -1.0726549 | 1.4957517  | -3.5806118 |
| C | -1.8511831 | 0.6261548  | -2.5876191 |
| C | -1.3603357 | 0.2636274  | -1.2278664 |
| C | -0.1248651 | -0.3387193 | -0.9385541 |
| C | 0.2496727  | -0.6138889 | 0.3711774  |
| C | -0.6144630 | -0.2951133 | 1.4246956  |
| C | -1.8547029 | 0.2990869  | 1.1622512  |
| C | -2.2116025 | 0.5693887  | -0.1511063 |
| H | -2.9124373 | 0.8570609  | -2.5701382 |
| H | -2.2020645 | -0.0670171 | -4.6414091 |
| H | -1.6826795 | 2.2425678  | -4.0827903 |
| C | 0.3558158  | 1.9397998  | -3.3394451 |
| C | 1.2428604  | 1.8116961  | -4.5848282 |
| C | 1.7212941  | 0.3852845  | -4.8677403 |
| C | 0.6312402  | -0.6230997 | -5.2838085 |
| C | -0.3255805 | -0.9491858 | -4.1608619 |
| O | -0.2619646 | -1.9949104 | -3.5388310 |
| C | -0.2293448 | -0.5857879 | 2.7781182  |
| N | 0.0812543  | -0.8199847 | 3.8696841  |
| H | 0.5558516  | -0.6178399 | -1.7323384 |
| H | 1.2070966  | -1.0809743 | 0.5784375  |
| H | -2.5270679 | 0.5422132  | 1.9785877  |
| H | -3.1755429 | 1.0281902  | -0.3521779 |
| H | 0.8177948  | 1.3697245  | -2.5258026 |
| H | 0.3320902  | 2.9831927  | -3.0065966 |
| H | 0.7105744  | 2.2036321  | -5.4623209 |
| H | 2.1296361  | 2.4408360  | -4.4478191 |
| H | 2.2500115  | -0.0008497 | -3.9857211 |
| H | 2.4527319  | 0.4149179  | -5.6821758 |
| H | 1.1001164  | -1.5566996 | -5.6066766 |
| H | 0.0593179  | -0.2041176 | -6.1214351 |

3\_sy\_tr\_1.log

E = -1188.207326  
H = -1187.841468  
G = -1187.911046

NImag=0

|   |            |            |             |
|---|------------|------------|-------------|
| C | 3.9482456  | -2.2203021 | -6.3807997  |
| C | 3.2674630  | -3.4655119 | -6.8871588  |
| C | 4.7810738  | -2.0131112 | -5.2942672  |
| O | 5.3468973  | -0.8879792 | -5.0477173  |
| C | 3.7283751  | -3.8025421 | -8.3412400  |
| C | 2.9290869  | -4.8911861 | -9.0199189  |
| C | 3.1407145  | -6.2556153 | -8.7834060  |
| C | 2.3458335  | -7.2126327 | -9.4006169  |
| C | 1.3170323  | -6.8019764 | -10.2571976 |
| C | 1.0893681  | -5.4436497 | -10.5012129 |
| C | 1.9024102  | -4.4987816 | -9.8860326  |
| C | 5.1278842  | -3.1444949 | -4.3101791  |
| C | 3.2006726  | -4.6516627 | -5.9132377  |
| S | 5.5410131  | -4.1904169 | -8.4690889  |
| C | 5.6984379  | -4.5132994 | -10.2405332 |
| C | 6.3529188  | -2.5739149 | -8.4184079  |
| C | 0.4885916  | -7.7885341 | -10.8976680 |
| N | -0.1780025 | -8.5825959 | -11.4137543 |
| C | 5.6211859  | -4.4263046 | -4.9859655  |
| C | 4.4975237  | -5.3480970 | -5.4800268  |
| H | 3.8315220  | -1.3542413 | -7.0365346  |
| H | 2.2097393  | -3.2217367 | -7.0912308  |
| H | 3.6366624  | -2.8824058 | -8.9299820  |
| H | 3.9335965  | -6.5888525 | -8.1189196  |
| H | 2.5155643  | -8.2688528 | -9.2208731  |
| H | 0.2928386  | -5.1358136 | -11.1703415 |
| H | 1.7378275  | -3.4427630 | -10.0802789 |
| H | 5.9173594  | -2.7390024 | -3.6708265  |
| H | 4.2748761  | -3.3701313 | -3.6548736  |
| H | 2.5246302  | -5.4117715 | -6.3222855  |
| H | 2.7009663  | -4.2657580 | -5.0172710  |
| H | 6.7669909  | -4.5072288 | -10.4648430 |
| H | 5.2807561  | -5.4961709 | -10.4573227 |
| H | 5.1799153  | -3.7305619 | -10.7990131 |
| H | 7.3684253  | -2.7390936 | -8.7857703  |
| H | 6.3585348  | -2.2212746 | -7.3883038  |
| H | 5.8118486  | -1.8818209 | -9.0671725  |
| H | 6.2798484  | -4.1403627 | -5.8171023  |
| H | 6.2523352  | -4.9948444 | -4.2924489  |
| H | 4.2207450  | -6.0293348 | -4.6656786  |
| H | 4.8823925  | -5.9917701 | -6.2801986  |

3\_sy\_tr\_10.log

E = -1188.209132  
H = -1187.843143  
G = -1187.912577

NImag=0

|   |           |            |             |
|---|-----------|------------|-------------|
| C | 5.0963773 | -4.1485697 | -6.7253709  |
| C | 3.8308726 | -3.3606893 | -6.9811805  |
| C | 5.8325019 | -4.0427516 | -5.5578492  |
| O | 6.8877834 | -4.7111407 | -5.2767396  |
| C | 3.3318984 | -3.3769142 | -8.4336202  |
| C | 2.7457288 | -4.6465644 | -9.0210232  |
| C | 3.0317103 | -5.9193973 | -8.5155137  |
| C | 2.4663749 | -7.0511762 | -9.0941508  |
| C | 1.6135052 | -6.9121155 | -10.1934264 |



|   |           |            |             |
|---|-----------|------------|-------------|
| C | 1.3117310 | -5.6455639 | -10.7077769 |
| C | 1.8756359 | -4.5246282 | -10.1140848 |
| C | 5.3291565 | -3.0708379 | -4.4807913  |
| C | 2.6295781 | -3.7219807 | -6.0679276  |
| S | 4.5543341 | -2.7391692 | -9.6957996  |
| C | 5.4405957 | -1.4286043 | -8.8361206  |
| C | 5.8478785 | -3.9763535 | -9.9295256  |
| C | 1.0350955 | -8.0822383 | -10.7997398 |
| N | 0.5697290 | -9.0229541 | -11.2891402 |
| C | 3.9867048 | -3.4892538 | -3.8586190  |
| C | 2.7489714 | -3.1001997 | -4.6736089  |
| H | 5.4180786 | -4.8904979 | -7.4504408  |
| H | 4.0156373 | -2.2921746 | -6.7793660  |
| H | 2.5674033 | -2.5962871 | -8.5320669  |
| H | 3.6897373 | -6.0342545 | -7.6623302  |
| H | 2.6861708 | -8.0368189 | -8.6976379  |
| H | 0.6397438 | -5.5452901 | -11.5535154 |
| H | 1.6286294 | -3.5393572 | -10.5016924 |
| H | 6.1013334 | -3.0369439 | -3.7062201  |
| H | 5.2288914 | -2.0523513 | -4.8873594  |
| H | 2.5490924 | -4.8126512 | -5.9882802  |
| H | 1.6927043 | -3.3599198 | -6.5157911  |
| H | 6.1869349 | -1.0509941 | -9.5383033  |
| H | 4.7239729 | -0.6405587 | -8.5987576  |
| H | 5.9119357 | -1.8365008 | -7.9397764  |
| H | 6.3605093 | -3.6975458 | -10.8522382 |
| H | 5.3700342 | -4.9502316 | -10.0566492 |
| H | 6.5287354 | -3.9754650 | -9.0803718  |
| H | 3.9945196 | -4.5753110 | -3.6887533  |
| H | 3.8896328 | -3.0212761 | -2.8709737  |
| H | 2.7389717 | -2.0058450 | -4.7828331  |
| H | 1.8517682 | -3.3619229 | -4.0993340  |

3\_sy\_tr\_11.log

E = -1188.209338

H = -1187.843750

G = -1187.913773

NImag=0

|   |           |            |             |
|---|-----------|------------|-------------|
| C | 5.1915715 | -3.7593618 | -6.4104886  |
| C | 4.4022295 | -2.7744053 | -7.2306058  |
| C | 4.8420471 | -4.4642687 | -5.2678585  |
| O | 5.6642886 | -5.1897206 | -4.6036520  |
| C | 4.1086165 | -3.2142154 | -8.7044275  |
| C | 3.3548740 | -4.4990895 | -8.9295934  |
| C | 3.9222237 | -5.7477152 | -8.6369260  |
| C | 3.1932632 | -6.9153459 | -8.8304319  |
| C | 1.8860047 | -6.8351861 | -9.3233604  |
| C | 1.3151835 | -5.5971021 | -9.6437383  |
| C | 2.0600276 | -4.4394340 | -9.4559186  |
| C | 3.4143741 | -4.4220227 | -4.6885279  |
| C | 3.1371748 | -2.1819467 | -6.5783599  |
| S | 5.7236211 | -3.4136159 | -9.5944928  |
| C | 5.1679747 | -3.4484853 | -11.3097226 |
| C | 6.4511180 | -1.7663335 | -9.5162247  |
| C | 1.1246466 | -8.0406056 | -9.5178391  |
| N | 0.5110131 | -9.0103840 | -9.6739862  |
| C | 2.2611702 | -4.4489724 | -5.6955822  |
| C | 1.9300565 | -3.0863778 | -6.3110168  |
| H | 6.2346493 | -3.8805905 | -6.7151909  |
| H | 5.0308964 | -1.8818597 | -7.3689399  |
| H | 3.6099058 | -2.3929334 | -9.2342185  |

|   |           |            |             |
|---|-----------|------------|-------------|
| H | 4.9317440 | -5.8121920 | -8.2448283  |
| H | 3.6292904 | -7.8813486 | -8.5984681  |
| H | 0.3069717 | -5.5484060 | -10.0414923 |
| H | 1.6272974 | -3.4755496 | -9.7087620  |
| H | 3.3509938 | -5.3005990 | -4.0388069  |
| H | 3.3144102 | -3.5462300 | -4.0293657  |
| H | 2.8041907 | -1.3317521 | -7.1875089  |
| H | 3.4761283 | -1.7595458 | -5.6247990  |
| H | 6.0603099 | -3.4156666 | -11.9375597 |
| H | 4.6373634 | -4.3882864 | -11.4710004 |
| H | 4.5209853 | -2.5901738 | -11.5022564 |
| H | 7.2171621 | -1.7286571 | -10.2937696 |
| H | 6.9172636 | -1.6422526 | -8.5388705  |
| H | 5.6805422 | -1.0130049 | -9.6929975  |
| H | 2.5056488 | -5.1675535 | -6.4866473  |
| H | 1.3590300 | -4.8327213 | -5.2032314  |
| H | 1.2718846 | -2.5371615 | -5.6251041  |
| H | 1.3513531 | -3.2322272 | -7.2295296  |

3\_sy\_tr\_12.log

E = -1188.205200

H = -1187.838671

G = -1187.906442

NImag=0

|   |           |            |             |
|---|-----------|------------|-------------|
| C | 5.1526154 | -3.3441607 | -6.5662963  |
| C | 3.9931482 | -2.6218097 | -7.1998930  |
| C | 5.2586496 | -4.5214674 | -5.8351758  |
| O | 6.3888013 | -5.0698396 | -5.5782737  |
| C | 3.6624427 | -2.9893546 | -8.6862176  |
| C | 3.0771651 | -4.3489681 | -8.9771165  |
| C | 3.7458099 | -5.5385291 | -8.6583810  |
| C | 3.1383479 | -6.7685604 | -8.8830177  |
| C | 1.8524399 | -6.8130771 | -9.4331086  |
| C | 1.1755801 | -5.6341186 | -9.7673199  |
| C | 1.7958714 | -4.4123325 | -9.5412464  |
| C | 4.0525196 | -5.2842278 | -5.2710722  |
| C | 2.6596828 | -2.5387242 | -6.4254389  |
| S | 5.0322387 | -2.6962413 | -9.9089187  |
| C | 5.8375677 | -1.1890184 | -9.3339365  |
| C | 6.3354387 | -3.9235276 | -9.6668915  |
| C | 1.2204504 | -8.0855481 | -9.6616826  |
| N | 0.7111678 | -9.1092714 | -9.8456121  |
| C | 2.8316709 | -4.5039373 | -4.7896530  |
| C | 2.0224954 | -3.8212791 | -5.8893518  |
| H | 6.1267214 | -2.9483117 | -6.8576981  |
| H | 4.2953749 | -1.5694021 | -7.2833994  |
| H | 2.9536596 | -2.2370813 | -9.0546321  |
| H | 4.7320032 | -5.5104201 | -8.2092382  |
| H | 3.6524704 | -7.6894906 | -8.6280557  |
| H | 0.1803093 | -5.6794053 | -10.1965734 |
| H | 1.2731885 | -3.4932349 | -9.7907887  |
| H | 3.7292738 | -6.0241765 | -6.0183510  |
| H | 4.4562290 | -5.8628196 | -4.4330410  |
| H | 1.9291157 | -2.0176353 | -7.0594593  |
| H | 2.8446193 | -1.8812830 | -5.5656088  |
| H | 6.5809889 | -0.9346245 | -10.0920697 |
| H | 5.0798078 | -0.4048844 | -9.2844772  |
| H | 6.3124263 | -1.3483869 | -8.3657329  |
| H | 7.2063095 | -3.5227209 | -10.1915963 |
| H | 6.0175648 | -4.8477417 | -10.1489830 |
| H | 6.5418942 | -4.0636100 | -8.6062594  |

|   |           |            |            |
|---|-----------|------------|------------|
| H | 2.1747596 | -5.2070101 | -4.2622094 |
| H | 3.1404279 | -3.7525583 | -4.0486161 |
| H | 1.0412172 | -3.5442867 | -5.4836906 |
| H | 1.8272355 | -4.5404232 | -6.6950160 |

3\_sy\_tr\_13.log

E = -1188.209593

H = -1187.843241

G = -1187.911592

NImag=0

|   |           |            |             |
|---|-----------|------------|-------------|
| C | 5.0418271 | -3.0925408 | -6.4410075  |
| C | 3.8416604 | -2.4988529 | -7.1330126  |
| C | 5.2339260 | -4.2442785 | -5.6876864  |
| O | 6.3993035 | -4.7182438 | -5.4433775  |
| C | 3.6751181 | -2.9494562 | -8.6239468  |
| C | 3.1564584 | -4.3298773 | -8.9147202  |
| C | 3.7803779 | -5.4951546 | -8.4454467  |
| C | 3.2127444 | -6.7414246 | -8.6794327  |
| C | 2.0106867 | -6.8305367 | -9.3918855  |
| C | 1.3808844 | -5.6796623 | -9.8779012  |
| C | 1.9625895 | -4.4403636 | -9.6402922  |
| C | 4.0887555 | -5.0606149 | -5.0743553  |
| C | 2.4665689 | -2.5287139 | -6.4400275  |
| S | 5.2640002 | -2.5627625 | -9.5058454  |
| C | 6.3417831 | -4.0076485 | -9.4470500  |
| C | 4.7392863 | -2.6347816 | -11.2286579 |
| C | 1.4184550 | -8.1200549 | -9.6309297  |
| N | 0.9407983 | -9.1572897 | -9.8239254  |
| C | 2.7820700 | -4.3703916 | -4.6910144  |
| C | 1.9504574 | -3.8457608 | -5.8594800  |
| H | 5.9847522 | -2.6378933 | -6.7579656  |
| H | 4.0538888 | -1.4254777 | -7.2462514  |
| H | 3.0125886 | -2.2264720 | -9.1177171  |
| H | 4.7001561 | -5.4330900 | -7.8760193  |
| H | 3.6917125 | -7.6415285 | -8.3079732  |
| H | 0.4517861 | -5.7585369 | -10.4324942 |
| H | 1.4755725 | -3.5427536 | -10.0113723 |
| H | 3.8646496 | -5.8977901 | -5.7523877  |
| H | 4.5233205 | -5.5163803 | -4.1774946  |
| H | 1.7233604 | -2.1332727 | -7.1464641  |
| H | 2.5192482 | -1.8075350 | -5.6137965  |
| H | 7.2476973 | -3.7143932 | -9.9827401  |
| H | 6.5727846 | -4.2186526 | -8.4014677  |
| H | 5.8642121 | -4.8545232 | -9.9410862  |
| H | 5.6312876 | -2.4999552 | -11.8435991 |
| H | 4.0405853 | -1.8145505 | -11.4002501 |
| H | 4.2726958 | -3.6008994 | -11.4325501 |
| H | 2.1776179 | -5.0964479 | -4.1329703  |
| H | 2.9898955 | -3.5431050 | -3.9972773  |
| H | 0.9277116 | -3.6602065 | -5.5080625  |
| H | 1.8719256 | -4.6224263 | -6.6309658  |

3\_sy\_tr\_14.log

E = -1188.210222

H = -1187.843869

G = -1187.912825

NImag=0

|   |           |            |            |
|---|-----------|------------|------------|
| C | 5.1344731 | -3.3637195 | -6.5265513 |
| C | 3.8941382 | -2.7395796 | -7.1239741 |
| C | 5.2535573 | -4.3261631 | -5.5363562 |

|   |           |            |             |
|---|-----------|------------|-------------|
| O | 6.3679754 | -4.7401075 | -5.0582556  |
| C | 3.6321596 | -3.0667574 | -8.6255066  |
| C | 3.0798725 | -4.4211711 | -8.9812097  |
| C | 3.6140088 | -5.6086288 | -8.4590460  |
| C | 3.0543087 | -6.8367804 | -8.7870848  |
| C | 1.9514938 | -6.8842802 | -9.6491932  |
| C | 1.4075618 | -5.7104907 | -10.1805960 |
| C | 1.9766691 | -4.4881056 | -9.8419163  |
| C | 3.9876851 | -4.9521366 | -4.9351475  |
| C | 2.5569064 | -2.9197624 | -6.3726997  |
| S | 5.1813472 | -2.6660792 | -9.5736874  |
| C | 6.1271058 | -4.1912862 | -9.7398254  |
| C | 4.5502153 | -2.5019235 | -11.2542037 |
| C | 1.3698621 | -8.1550923 | -9.9912815  |
| N | 0.9011269 | -9.1775903 | -10.2670575 |
| C | 3.1313476 | -3.9792168 | -4.1107378  |
| C | 2.7101412 | -2.7033718 | -4.8646609  |
| H | 6.0758612 | -2.9151093 | -6.8536217  |
| H | 4.0612633 | -1.6496674 | -7.1377218  |
| H | 2.9540562 | -2.3033696 | -9.0286509  |
| H | 4.4677672 | -5.5654447 | -7.7910382  |
| H | 3.4649470 | -7.7550728 | -8.3801955  |
| H | 0.5516354 | -5.7573460 | -10.8455748 |
| H | 1.5543864 | -3.5719093 | -10.2460425 |
| H | 3.3672785 | -5.3929639 | -5.7245515  |
| H | 4.3144903 | -5.7755605 | -4.2924506  |
| H | 2.1272223 | -3.9101351 | -6.5631922  |
| H | 1.8465923 | -2.1943359 | -6.7882224  |
| H | 7.0102885 | -3.9309027 | -10.3274972 |
| H | 6.4208061 | -4.5145952 | -8.7407773  |
| H | 5.5326318 | -4.9486611 | -10.2527604 |
| H | 5.4104266 | -2.3441979 | -11.9073710 |
| H | 3.8964482 | -1.6287887 | -11.2815449 |
| H | 4.0121909 | -3.4084557 | -11.5391323 |
| H | 2.2315737 | -4.5150616 | -3.7822620  |
| H | 3.6739832 | -3.6997549 | -3.1990079  |
| H | 3.4469566 | -1.9077876 | -4.7014300  |
| H | 1.7655385 | -2.3387374 | -4.4459641  |

3\_sy\_tr\_15.log

E = -1188.205831

H = -1187.839602

G = -1187.908595

NImag=0

|   |           |            |            |
|---|-----------|------------|------------|
| C | 5.2045844 | -3.5878333 | -6.6749629 |
| C | 4.0303069 | -2.8079648 | -7.2154731 |
| C | 5.2162575 | -4.6344073 | -5.7666982 |
| O | 6.2764367 | -5.1937269 | -5.3133104 |
| C | 3.6080739 | -3.0688693 | -8.6941705 |
| C | 2.9993438 | -4.4129804 | -9.0236452 |
| C | 3.6384851 | -5.6219168 | -8.7139405 |
| C | 3.0265584 | -6.8356156 | -9.0051405 |
| C | 1.7659363 | -6.8450444 | -9.6128578 |
| C | 1.1149341 | -5.6473794 | -9.9296848 |
| C | 1.7383588 | -4.4417310 | -9.6333413 |
| C | 3.8842434 | -5.1687308 | -5.2265595 |
| C | 2.7088391 | -2.8319006 | -6.4001461 |
| S | 4.9012464 | -2.7134006 | -9.9809139 |
| C | 5.8091895 | -1.2992009 | -9.3290353 |
| C | 6.1482905 | -4.0156161 | -9.9143635 |
| C | 1.1324681 | -8.1013810 | -9.9148499 |

|   |           |            |             |
|---|-----------|------------|-------------|
| N | 0.6225724 | -9.1123858 | -10.1579911 |
| C | 3.1714412 | -4.1884101 | -4.2828354  |
| C | 2.9454554 | -2.7908798 | -4.8881592  |
| H | 6.1876133 | -3.2118920 | -6.9612301  |
| H | 4.3248571 | -1.7480317 | -7.2151796  |
| H | 2.8755605 | -2.2984908 | -8.9679208  |
| H | 4.6075919 | -5.6125110 | -8.2277571  |
| H | 3.5187530 | -7.7714182 | -8.7614580  |
| H | 0.1368581 | -5.6651577 | -10.3989112 |
| H | 1.2366812 | -3.5078874 | -9.8713979  |
| H | 3.2095608 | -5.4242502 | -6.0520664  |
| H | 4.1001470 | -6.0983331 | -4.6905269  |
| H | 2.1083438 | -3.7148461 | -6.6506970  |
| H | 2.1161371 | -1.9636855 | -6.7118724  |
| H | 6.5279771 | -1.0167722 | -10.1006787 |
| H | 5.0942444 | -0.4883608 | -9.1774838  |
| H | 6.3186059 | -1.5616451 | -8.4016881  |
| H | 6.9935264 | -3.6379001 | -10.4948361 |
| H | 5.7365340 | -4.8978964 | -10.4046113 |
| H | 6.4343473 | -4.2174755 | -8.8826512  |
| H | 2.2007581 | -4.6212448 | -4.0084152  |
| H | 3.7440719 | -4.0946374 | -3.3515872  |
| H | 3.8085679 | -2.1464307 | -4.6846736  |
| H | 2.0861416 | -2.3233584 | -4.3943785  |

3\_sy\_tr\_16.log

E = -1188.203612

H = -1187.837532

G = -1187.906745

NImag=0

|   |            |            |             |
|---|------------|------------|-------------|
| C | 4.1552523  | -2.3787260 | -6.4815679  |
| C | 3.5786061  | -3.7121058 | -6.9184990  |
| C | 4.4602894  | -1.9657583 | -5.1968600  |
| O | 4.9557154  | -0.8232549 | -4.8888298  |
| C | 3.8819239  | -3.9253658 | -8.4335855  |
| C | 2.9680527  | -4.9378818 | -9.0929657  |
| C | 3.2141959  | -6.3154700 | -9.1252012  |
| C | 2.2942636  | -7.1855769 | -9.6999379  |
| C | 1.1119369  | -6.6747602 | -10.2445647 |
| C | 0.8517070  | -5.2995154 | -10.2228454 |
| C | 1.7830817  | -4.4430723 | -9.6514651  |
| C | 4.2054187  | -2.9384611 | -4.0391147  |
| C | 3.9704612  | -4.9583862 | -6.0705100  |
| S | 5.6446245  | -4.4043423 | -8.7446601  |
| C | 5.6678664  | -4.5207186 | -10.5482249 |
| C | 6.5788358  | -2.8698245 | -8.5516745  |
| C | 0.1570978  | -7.5712895 | -10.8399585 |
| N | -0.6118409 | -8.2924248 | -11.3193638 |
| C | 5.1964321  | -4.1103751 | -4.0007300  |
| C | 5.3153298  | -4.8527156 | -5.3417261  |
| H | 4.3274456  | -1.6516021 | -7.2755155  |
| H | 2.4744424  | -3.6900247 | -6.9326330  |
| H | 3.7714633  | -2.9674949 | -8.9542665  |
| H | 4.1280964  | -6.7353640 | -8.7130303  |
| H | 2.4909260  | -8.2519956 | -9.7270229  |
| H | -0.0650259 | -4.9108594 | -10.6536497 |
| H | 1.5901529  | -3.3739927 | -9.6356649  |
| H | 4.2734513  | -2.3689646 | -3.1070544  |
| H | 3.1843081  | -3.3364555 | -4.1000868  |
| H | 3.9651960  | -5.8472625 | -6.7099057  |
| H | 3.1853517  | -5.1422296 | -5.3293766  |

|   |           |            |             |
|---|-----------|------------|-------------|
| H | 6.7179622 | -4.5454427 | -10.8454566 |
| H | 5.1777852 | -5.4474000 | -10.8455962 |
| H | 5.1633330 | -3.6508112 | -10.9741134 |
| H | 7.5649183 | -3.0676480 | -8.9783807  |
| H | 6.6546464 | -2.6440011 | -7.4895967  |
| H | 6.0717671 | -2.0676329 | -9.0908257  |
| H | 6.1861663 | -3.7478212 | -3.6963520  |
| H | 4.8703072 | -4.8180642 | -3.2274939  |
| H | 5.7146464 | -5.8578102 | -5.1641064  |
| H | 6.0479100 | -4.3399977 | -5.9752872  |

3\_sy\_tr\_17.log

E = -1188.213285

H = -1187.847221

G = -1187.916866

NImag=0

|   |           |            |             |
|---|-----------|------------|-------------|
| C | 5.0860647 | -3.9816959 | -6.5027751  |
| C | 3.8278099 | -3.2649209 | -6.9421919  |
| C | 5.6629733 | -3.8140779 | -5.2522669  |
| O | 6.6869807 | -4.4412991 | -4.8165892  |
| C | 3.5403646 | -3.3821477 | -8.4518424  |
| C | 2.9536285 | -4.6593111 | -9.0004031  |
| C | 3.3058850 | -5.9269111 | -8.5164375  |
| C | 2.7353587 | -7.0727079 | -9.0562650  |
| C | 1.8044771 | -6.9561099 | -10.0954773 |
| C | 1.4344076 | -5.6999619 | -10.5860954 |
| C | 2.0092043 | -4.5623364 | -10.0313842 |
| C | 4.9943361 | -2.8302864 | -4.2826481  |
| C | 2.5402508 | -3.6379870 | -6.1704218  |
| S | 5.1029425 | -2.8852270 | -9.3558752  |
| C | 5.8939904 | -4.4008142 | -9.9342129  |
| C | 4.4430629 | -2.3021199 | -10.9327107 |
| C | 1.2145952 | -8.1419995 | -10.6583559 |
| N | 0.7407033 | -9.0961106 | -11.1123562 |
| C | 3.6025159 | -3.2907883 | -3.8184692  |
| C | 2.4633056 | -2.9739994 | -4.7926139  |
| H | 5.5052349 | -4.7646350 | -7.1287702  |
| H | 3.9572236 | -2.1800897 | -6.7877598  |
| H | 2.8732367 | -2.5617526 | -8.7390130  |
| H | 4.0201698 | -6.0246715 | -7.7071179  |
| H | 3.0064283 | -8.0522699 | -8.6767980  |
| H | 0.7028478 | -5.6185409 | -11.3830429 |
| H | 1.7112608 | -3.5828813 | -10.3960284 |
| H | 5.6619258 | -2.7388997 | -3.4205399  |
| H | 4.9039320 | -1.8314514 | -4.7356116  |
| H | 2.4851348 | -4.7292039 | -6.0685982  |
| H | 1.6560262 | -3.3221525 | -6.7432563  |
| H | 6.7065028 | -4.0784491 | -10.5895022 |
| H | 6.3006467 | -4.9371919 | -9.0782054  |
| H | 5.1751006 | -5.0089245 | -10.4863322 |
| H | 5.2987697 | -2.0122701 | -11.5457781 |
| H | 3.8162820 | -1.4312199 | -10.7347057 |
| H | 3.8760834 | -3.0963314 | -11.4220366 |
| H | 3.6309755 | -4.3709350 | -3.6163247  |
| H | 3.3649496 | -2.8028456 | -2.8649871  |
| H | 2.4284783 | -1.8843496 | -4.9372626  |
| H | 1.5113338 | -3.2544223 | -4.3254370  |

3\_sy\_tr\_18.log

E = -1188.209489

```

H =      -1187.843649
G =      -1187.913495
NImag=0
C      5.0833420      -3.8935056      -6.5053377
C      3.9213212      -3.0785531      -7.0319336
C      5.2922387      -4.3976476      -5.2308365
O      6.2707179      -5.1632429      -4.9153314
C      3.6806648      -3.2817683      -8.5466923
C      3.0693488      -4.5778989      -9.0136276
C      3.5070386      -5.8283885      -8.5524951
C      2.8969641      -6.9951132      -8.9950674
C      1.8413116      -6.9175902      -9.9121558
C      1.3919694      -5.6795635     -10.3823500
C      2.0089611      -4.5196488      -9.9275582
C      4.3462999      -4.0441486      -4.0687030
C      2.5757944      -3.3463942      -6.3266837
S      5.2557495      -2.8691846      -9.4718616
C      5.9725379      -4.4240063     -10.0412688
C      4.5956518      -2.2592873     -11.0355606
C      1.2088985      -8.1255083     -10.3732560
N      0.6995694      -9.0970242     -10.7445812
C      3.6955997      -2.6593799      -4.1267293
C      2.4380470      -2.6012325      -4.9965531
H      5.8608455      -4.1662796      -7.2196275
H      4.1032459      -1.9904012      -6.9476373
H      3.0389316      -2.4619911      -8.8892007
H      4.3232044      -5.8841298      -7.8402385
H      3.2328411      -7.9618999      -8.6348955
H      0.5699589      -5.6291382     -11.0886119
H      1.6568039      -3.5544704     -10.2816441
H      3.5731015      -4.8220488      -3.9769819
H      4.9646984      -4.1247111      -3.1685999
H      2.4776202      -4.4271611      -6.1679403
H      1.7444545      -3.0481876      -6.9798226
H      6.8405356      -4.1462284     -10.6431477
H      6.2924854      -5.0058537      -9.1769018
H      5.2449504      -4.9706020     -10.6431508
H      5.4468073      -2.0788255     -11.6950577
H      4.0744750      -1.3223090     -10.8340207
H      3.9230511      -3.0022609     -11.4692693
H      3.4358825      -2.3287534      -3.1140287
H      4.4360370      -1.9412568      -4.5030469
H      2.1844675      -1.5518682      -5.1929263
H      1.5920758      -3.0313367      -4.4455667

```

```

3_sy_tr_19.log
E =      -1188.206143
H =      -1187.840071
G =      -1187.909306
NImag=0
C      5.1728354      -3.3302769      -6.4554133
C      4.0539584      -2.6004982      -7.1538097
C      5.1981918      -3.9948071      -5.2375372
O      6.2738615      -4.4293922      -4.6913978
C      3.7725593      -3.0285950      -8.6279640
C      3.1780439      -4.3748967      -8.9330062
C      3.7223711      -5.5696397      -8.4412965
C      3.1158771      -6.7885168      -8.7214366
C      1.9558007      -6.8183621      -9.5034581
C      1.4048630      -5.6364025     -10.0131185
C      2.0230877      -4.4261431      -9.7271060

```

|   |           |            |             |
|---|-----------|------------|-------------|
| C | 3.9114495 | -4.2780173 | -4.4389111  |
| C | 2.7259240 | -2.4628655 | -6.3878753  |
| S | 5.3286988 | -2.7098373 | -9.6070155  |
| C | 6.2500293 | -4.2540821 | -9.7308597  |
| C | 4.6862647 | -2.5958782 | -11.2868898 |
| C | 1.3254091 | -8.0794582 | -9.7914060  |
| N | 0.8176309 | -9.0941334 | -10.0235822 |
| C | 2.7277845 | -4.8010127 | -5.2561492  |
| C | 1.9365816 | -3.7204270 | -6.0097502  |
| H | 6.1618912 | -3.1748472 | -6.8955101  |
| H | 4.3764804 | -1.5540255 | -7.2912509  |
| H | 3.1253502 | -2.2582218 | -9.0668259  |
| H | 4.6146623 | -5.5437911 | -7.8259322  |
| H | 3.5333247 | -7.7122076 | -8.3341745  |
| H | 0.5070108 | -5.6703152 | -10.6211005 |
| H | 1.5966220 | -3.5047896 | -10.1145806 |
| H | 4.1992399 | -5.0301180 | -3.6978203  |
| H | 3.6162464 | -3.3831021 | -3.8719335  |
| H | 2.0654356 | -1.8066542 | -6.9699482  |
| H | 2.9647157 | -1.9132529 | -5.4697695  |
| H | 7.1321896 | -4.0222889 | -10.3322132 |
| H | 6.5527191 | -4.5565713 | -8.7282241  |
| H | 5.6425592 | -5.0176595 | -10.2186312 |
| H | 5.5458359 | -2.5025221 | -11.9535360 |
| H | 4.0675334 | -1.6992070 | -11.3472114 |
| H | 4.1100771 | -3.4924682 | -11.5251717 |
| H | 3.1071437 | -5.5488556 | -5.9608154  |
| H | 2.0365172 | -5.3348968 | -4.5924932  |
| H | 1.1088273 | -3.3806187 | -5.3742061  |
| H | 1.4693960 | -4.1611449 | -6.8981684  |

3\_sy\_tr\_1\_r.log

E = -1188.209881

H = -1187.843934

G = -1187.913529

NImag=0

|   |            |            |            |
|---|------------|------------|------------|
| C | 1.5102034  | -1.5974549 | 0.0028485  |
| C | 1.1201292  | -0.6892164 | 1.1523921  |
| C | 1.2492877  | -2.9457545 | -0.2075006 |
| O | 1.8007155  | -3.6373111 | -1.1336963 |
| C | 0.0794586  | 0.3659441  | 0.6859599  |
| C | 0.4501128  | 1.0540201  | -0.6068335 |
| C | 1.7031487  | 1.6606874  | -0.7642583 |
| C | 2.0241899  | 2.3156659  | -1.9453022 |
| C | 1.0832894  | 2.3609881  | -2.9825384 |
| C | -0.1701706 | 1.7565983  | -2.8400680 |
| C | -0.4799716 | 1.1110545  | -1.6478021 |
| C | 0.2448927  | -3.7213482 | 0.6606087  |
| C | 0.6927555  | -1.4144627 | 2.4392164  |
| S | -0.0607121 | 1.7497205  | 1.9659347  |
| C | -0.9606215 | 3.0464070  | 1.0844283  |
| C | -1.3787842 | 1.2380086  | 3.0917593  |
| C | 1.4116385  | 3.0386075  | -4.2086950 |
| N | 1.6760522  | 3.5854251  | -5.1947464 |
| C | -0.9594513 | -2.9271696 | 1.1649474  |
| C | -0.6783702 | -2.0997358 | 2.4220986  |
| H | 2.2114181  | -1.1560397 | -0.7053792 |
| H | 2.0182169  | -0.1128013 | 1.4222828  |
| H | -0.9317582 | -0.0500163 | 0.6136516  |
| H | 2.4396527  | 1.6225123  | 0.0341918  |
| H | 2.9933174  | 2.7871571  | -2.0696643 |



|   |            |            |            |
|---|------------|------------|------------|
| H | -0.8895810 | 1.7965745  | -3.6512134 |
| H | -1.4526683 | 0.6431816  | -1.5259611 |
| H | -0.0949302 | -4.5485227 | 0.0290155  |
| H | 0.7745787  | -4.1813488 | 1.5086673  |
| H | 0.7379882  | -0.7233174 | 3.2921434  |
| H | 1.4654088  | -2.1655032 | 2.6381112  |
| H | -1.2361803 | 3.7907711  | 1.8342437  |
| H | -0.2950191 | 3.4932836  | 0.3462157  |
| H | -1.8491998 | 2.6205235  | 0.6136527  |
| H | -1.6623209 | 2.1338392  | 3.6484290  |
| H | -0.9902625 | 0.4905736  | 3.7813875  |
| H | -2.2250613 | 0.8593203  | 2.5158726  |
| H | -1.3056097 | -2.2727278 | 0.3541093  |
| H | -1.7895235 | -3.6103377 | 1.3815367  |
| H | -0.7281599 | -2.7532767 | 3.3022272  |
| H | -1.4830077 | -1.3662894 | 2.5470447  |

3\_sy\_tr\_1\_ts1.log

E = -1188.184029

H = -1187.820732

G = -1187.889922

NImag=1

|   |            |            |            |
|---|------------|------------|------------|
| C | 2.4463813  | -0.8690312 | 1.3462401  |
| C | 1.0905507  | -0.9909447 | 1.0029502  |
| C | 3.5952664  | -1.2178129 | 0.5719435  |
| O | 4.7540166  | -1.0786999 | 1.0217848  |
| C | 0.0950782  | 0.8741849  | 0.6998274  |
| C | -1.2896703 | 0.5228505  | 0.4499583  |
| C | -1.9077592 | 0.5424134  | -0.8235514 |
| C | -3.1958614 | 0.0695609  | -1.0047242 |
| C | -3.9198748 | -0.4383253 | 0.0862356  |
| C | -3.3367065 | -0.4483363 | 1.3639340  |
| C | -2.0504512 | 0.0302292  | 1.5386743  |
| C | 3.4511448  | -1.7910184 | -0.8369177 |
| C | 0.6023828  | -1.8416728 | -0.1507495 |
| S | 0.8381393  | 1.9376697  | -0.4973855 |
| C | 0.0250016  | 3.5490253  | -0.3109281 |
| C | 2.4212990  | 2.3192145  | 0.2731586  |
| C | -5.2517679 | -0.9283128 | -0.1005170 |
| N | -6.3311254 | -1.3267987 | -0.2520204 |
| C | 2.4799304  | -1.0069545 | -1.7261370 |
| C | 1.0125825  | -1.4185074 | -1.5656602 |
| H | 2.6758762  | -0.4452130 | 2.3232100  |
| H | 0.4210690  | -1.0368417 | 1.8623756  |
| H | 0.2994991  | 1.2589746  | 1.6996560  |
| H | -1.3788750 | 0.9297773  | -1.6906619 |
| H | -3.6502160 | 0.0927773  | -1.9903609 |
| H | -3.9000651 | -0.8256072 | 2.2119104  |
| H | -1.6123223 | 0.0313856  | 2.5330441  |
| H | 4.4558262  | -1.7828639 | -1.2680444 |
| H | 3.1379264  | -2.8424398 | -0.7720378 |
| H | -0.4898995 | -1.9069752 | -0.1091045 |
| H | 0.9720920  | -2.8579827 | 0.0405601  |
| H | 0.5648713  | 4.2722233  | -0.9268533 |
| H | -1.0007202 | 3.4453510  | -0.6695445 |
| H | 0.0426264  | 3.8348062  | 0.7425523  |
| H | 2.9016333  | 3.0804226  | -0.3439085 |
| H | 3.0206725  | 1.4095297  | 0.2950364  |
| H | 2.2443904  | 2.6901212  | 1.2850605  |
| H | 2.6043956  | 0.0622579  | -1.5132309 |
| H | 2.7652334  | -1.1326214 | -2.7762056 |

|   |           |            |            |
|---|-----------|------------|------------|
| H | 0.8031062 | -2.2648006 | -2.2306948 |
| H | 0.3684672 | -0.5991975 | -1.9054861 |

3\_sy\_tr\_1\_ts2.log

E = -1188.201534  
H = -1187.836949  
G = -1187.907174

NImag=1

|   |            |            |            |
|---|------------|------------|------------|
| C | 1.3369521  | -1.6314260 | -0.6699958 |
| C | 1.4250417  | -0.1729226 | -1.0593030 |
| C | 2.2898131  | -2.4667191 | -0.0552928 |
| O | 2.1061137  | -3.7116348 | 0.0669277  |
| C | 0.4855391  | 0.3350966  | -0.0154777 |
| C | -0.9388324 | -0.0923140 | -0.0013837 |
| C | -1.6562967 | -0.2797298 | -1.1928106 |
| C | -3.0039812 | -0.6084212 | -1.1572238 |
| C | -3.6455472 | -0.7528839 | 0.0806749  |
| C | -2.9431524 | -0.5683201 | 1.2778843  |
| C | -1.5963743 | -0.2339724 | 1.2276732  |
| C | 3.6156819  | -1.9243692 | 0.4857405  |
| C | 2.8135669  | 0.4723423  | -1.0549770 |
| S | 0.1338336  | 2.5126515  | -0.5040537 |
| C | -1.3176360 | 2.9301126  | 0.4891600  |
| C | 1.3780858  | 3.4423171  | 0.4210680  |
| C | -5.0420139 | -1.0943877 | 0.1206567  |
| N | -6.1669974 | -1.3684966 | 0.1529508  |
| C | 3.5209838  | -0.5862746 | 1.2181124  |
| C | 3.5175387  | 0.6416159  | 0.2980848  |
| H | 0.4412894  | -2.1447907 | -1.0108442 |
| H | 0.9973728  | -0.0266740 | -2.0590023 |
| H | 0.9133111  | 0.4718168  | 0.9787109  |
| H | -1.1630061 | -0.1667067 | -2.1538193 |
| H | -3.5613320 | -0.7528750 | -2.0767971 |
| H | -3.4500998 | -0.6847498 | 2.2299939  |
| H | -1.0428659 | -0.0843906 | 2.1505330  |
| H | 3.9914727  | -2.6971850 | 1.1627307  |
| H | 4.3380682  | -1.8529980 | -0.3402815 |
| H | 2.7439528  | 1.4596750  | -1.5315731 |
| H | 3.4414767  | -0.1335174 | -1.7184416 |
| H | -1.4600853 | 4.0120442  | 0.4404801  |
| H | -2.1856844 | 2.4290946  | 0.0578398  |
| H | -1.1701940 | 2.6139048  | 1.5245671  |
| H | 1.0625436  | 4.4877855  | 0.4531374  |
| H | 2.3271808  | 3.3685297  | -0.1110226 |
| H | 1.4709036  | 3.0468721  | 1.4350529  |
| H | 2.6185490  | -0.5977478 | 1.8419358  |
| H | 4.3648188  | -0.4908819 | 1.9110185  |
| H | 4.5542744  | 0.9250852  | 0.0788922  |
| H | 3.0872860  | 1.4850627  | 0.8474220  |

3\_sy\_tr\_2.log

E = -1188.208322  
H = -1187.842319  
G = -1187.913153

NImag=0

|   |           |            |            |
|---|-----------|------------|------------|
| C | 4.3056578 | -2.4448437 | -6.4409377 |
| C | 3.7371269 | -3.7654376 | -6.9124098 |
| C | 5.0041802 | -2.1451871 | -5.2824440 |
| O | 5.6289916 | -1.0406769 | -5.0956815 |
| C | 3.8904708 | -3.8420716 | -8.4611772 |

|   |            |            |             |
|---|------------|------------|-------------|
| C | 3.0457340  | -4.9180462 | -9.1091843  |
| C | 3.4517870  | -6.2501837 | -9.2549791  |
| C | 2.5951775  | -7.1941886 | -9.8096267  |
| C | 1.3147300  | -6.8053447 | -10.2168910 |
| C | 0.8932926  | -5.4779163 | -10.0781897 |
| C | 1.7637997  | -4.5448255 | -9.5304832  |
| C | 5.0329963  | -3.1189708 | -4.0908046  |
| C | 4.3387105  | -5.0011643 | -6.2250742  |
| S | 5.6659321  | -4.0690457 | -8.9519165  |
| C | 5.5314150  | -4.0821312 | -10.7544275 |
| C | 6.4357140  | -2.4457375 | -8.7449808  |
| C | 0.4242856  | -7.7787728 | -10.7910697 |
| N | -0.2930779 | -8.5616627 | -11.2532732 |
| C | 3.7894850  | -3.9972247 | -3.9287757  |
| C | 3.8000343  | -5.2458339 | -4.8139495  |
| H | 4.2722989  | -1.6391357 | -7.1749342  |
| H | 2.6388457  | -3.8299658 | -6.7905744  |
| H | 3.6161781  | -2.8731968 | -8.8933115  |
| H | 4.4431956  | -6.5724976 | -8.9469934  |
| H | 2.9144695  | -8.2243981 | -9.9257801  |
| H | -0.0996528 | -5.1841553 | -10.4019490 |
| H | 1.4465185  | -3.5109634 | -9.4264813  |
| H | 5.9374220  | -3.7440575 | -4.1393898  |
| H | 5.1537653  | -2.4799881 | -3.2095829  |
| H | 5.4295699  | -4.8804644 | -6.1837278  |
| H | 4.1425770  | -5.9022135 | -6.8166967  |
| H | 6.5452131  | -3.9689259 | -11.1432340 |
| H | 5.1202484  | -5.0404316 | -11.0703011 |
| H | 4.8967541  | -3.2532684 | -11.0754012 |
| H | 7.3855681  | -2.5026496 | -9.2821411  |
| H | 6.5943533  | -2.2737998 | -7.6816957  |
| H | 5.7876723  | -1.6804683 | -9.1760503  |
| H | 3.6852163  | -4.3093497 | -2.8827422  |
| H | 2.9049016  | -3.3897144 | -4.1593733  |
| H | 2.7842641  | -5.6556283 | -4.8798457  |
| H | 4.4209781  | -6.0194621 | -4.3448186  |

3\_sy\_tr\_20.log

E = -1188.204846

H = -1187.838843

G = -1187.908400

NImag=0

|   |           |            |             |
|---|-----------|------------|-------------|
| C | 5.1094942 | -3.9863729 | -6.7099906  |
| C | 3.9480899 | -3.1069919 | -7.1173271  |
| C | 5.3730829 | -4.5759185 | -5.4822744  |
| O | 6.3257604 | -5.4104765 | -5.2829364  |
| C | 3.5342314 | -3.2352024 | -8.6045140  |
| C | 2.9101470 | -4.5339858 | -9.0657082  |
| C | 3.4890218 | -5.7854621 | -8.8097542  |
| C | 2.8594457 | -6.9506074 | -9.2312008  |
| C | 1.6441462 | -6.8684032 | -9.9210427  |
| C | 1.0557634 | -5.6280547 | -10.1887885 |
| C | 1.6944671 | -4.4711365 | -9.7585822  |
| C | 4.5435942 | -4.2340789 | -4.2314497  |
| C | 2.6532965 | -3.3583534 | -6.3108364  |
| S | 4.8173834 | -2.7322246 | -9.8697416  |
| C | 5.9264197 | -1.6160831 | -8.9900800  |
| C | 5.8865282 | -4.1372722 | -10.2359517 |
| C | 0.9937662 | -8.0740308 | -10.3623597 |
| N | 0.4709040 | -9.0441176 | -10.7182055 |
| C | 3.9616321 | -2.8195834 | -4.1762477  |

|   |           |            |             |
|---|-----------|------------|-------------|
| C | 2.6494547 | -2.6645305 | -4.9467784  |
| H | 5.8204087 | -4.2568773 | -7.4862605  |
| H | 4.1713644 | -2.0300385 | -7.0031706  |
| H | 2.8051120 | -2.4397137 | -8.7934297  |
| H | 4.4297620 | -5.8496370 | -8.2754208  |
| H | 3.3050491 | -7.9193345 | -9.0304848  |
| H | 0.1132257 | -5.5744613 | -10.7234478 |
| H | 1.2398241 | -3.5047463 | -9.9595654  |
| H | 3.7421889 | -4.9783201 | -4.1084926  |
| H | 5.2287884 | -4.3856097 | -3.3907454  |
| H | 2.5314499 | -4.4413450 | -6.1875364  |
| H | 1.7810865 | -3.0071807 | -6.8782568  |
| H | 6.7047328 | -1.3349588 | -9.7023637  |
| H | 5.3494566 | -0.7334197 | -8.7094225  |
| H | 6.3493606 | -2.1133240 | -8.1159955  |
| H | 6.6529188 | -3.7444460 | -10.9082153 |
| H | 5.2884373 | -4.8790348 | -10.7662618 |
| H | 6.3383340 | -4.5531222 | -9.3376038  |
| H | 3.7928415 | -2.5267843 | -3.1330977  |
| H | 4.7075586 | -2.1193501 | -4.5750842  |
| H | 2.4329492 | -1.5974800 | -5.0828600  |
| H | 1.8253218 | -3.0796297 | -4.3527149  |

3\_sy\_tr\_21.log

E = -1188.202158

H = -1187.835887

G = -1187.904658

NImag=0

|   |           |            |             |
|---|-----------|------------|-------------|
| C | 5.2354248 | -3.5848827 | -6.5905344  |
| C | 4.1627588 | -2.7152577 | -7.1929582  |
| C | 5.2183401 | -4.3707454 | -5.4470696  |
| O | 6.2630710 | -4.9379565 | -4.9652748  |
| C | 3.6693241 | -3.0574900 | -8.6338229  |
| C | 3.0751650 | -4.4132984 | -8.9329066  |
| C | 3.7615152 | -5.6087149 | -8.6772639  |
| C | 3.1726954 | -6.8352879 | -8.9643733  |
| C | 1.8849096 | -6.8706318 | -9.5092214  |
| C | 1.1866698 | -5.6864736 | -9.7753591  |
| C | 1.7906322 | -4.4690010 | -9.4907067  |
| C | 3.9265899 | -4.6307353 | -4.6473714  |
| C | 2.9368379 | -2.4308177 | -6.2994561  |
| S | 4.9166767 | -2.7214915 | -9.9902888  |
| C | 5.9090630 | -1.3374578 | -9.3992161  |
| C | 6.1482059 | -4.0403028 | -10.0023880 |
| C | 1.2724046 | -8.1387811 | -9.8048956  |
| N | 0.7785274 | -9.1588268 | -10.0433123 |
| C | 2.6494453 | -4.8588414 | -5.4592889  |
| C | 1.9783139 | -3.5759238 | -5.9650563  |
| H | 6.2248470 | -3.4752685 | -7.0381949  |
| H | 4.5915793 | -1.7116463 | -7.3230007  |
| H | 2.9238919 | -2.2997050 | -8.9065880  |
| H | 4.7503641 | -5.5820753 | -8.2348893  |
| H | 3.7031340 | -7.7600364 | -8.7627241  |
| H | 0.1892704 | -5.7244589 | -10.2004007 |
| H | 1.2541629 | -3.5461646 | -9.6935534  |
| H | 4.1416088 | -5.5245286 | -4.0530905  |
| H | 3.7734497 | -3.8137048 | -3.9261358  |
| H | 2.3582827 | -1.6190887 | -6.7588449  |
| H | 3.3417894 | -2.0258374 | -5.3644439  |
| H | 6.5886466 | -1.0853976 | -10.2157656 |
| H | 5.2385889 | -0.4981279 | -9.2071453  |

|   |           |            |             |
|---|-----------|------------|-------------|
| H | 6.4666625 | -1.6196755 | -8.5050136  |
| H | 6.9450610 | -3.6797698 | -10.6575786 |
| H | 5.6933116 | -4.9276878 | -10.4420164 |
| H | 6.5265548 | -4.2309408 | -8.9987678  |
| H | 2.8913868 | -5.5123707 | -6.3040798  |
| H | 1.9249044 | -5.4097503 | -4.8469150  |
| H | 1.2983902 | -3.1995277 | -5.1897482  |
| H | 1.3473423 | -3.8093190 | -6.8307390  |

3\_sy\_tr\_22.log

E = -1188.204892  
H = -1187.838841  
G = -1187.908924

NImag=0

|   |            |            |             |
|---|------------|------------|-------------|
| C | 4.5409386  | -2.5149658 | -6.4754625  |
| C | 4.1323076  | -3.8899478 | -6.9659133  |
| C | 4.2973862  | -2.0017126 | -5.2128844  |
| O | 4.5335500  | -0.7910201 | -4.8640844  |
| C | 4.1151788  | -3.9414671 | -8.5163540  |
| C | 3.1200542  | -4.9305121 | -9.0876353  |
| C | 3.3552961  | -6.3106121 | -9.1272151  |
| C | 2.3897349  | -7.1758655 | -9.6285675  |
| C | 1.1758968  | -6.6574890 | -10.0927840 |
| C | 0.9279457  | -5.2803333 | -10.0623974 |
| C | 1.9044032  | -4.4268028 | -9.5647293  |
| C | 3.7139769  | -2.8664050 | -4.0770134  |
| C | 4.8994415  | -5.0687802 | -6.3353750  |
| S | 5.7608342  | -4.3482115 | -9.2600684  |
| C | 5.4340002  | -3.9935893 | -10.9983283 |
| C | 6.8166697  | -2.9509269 | -8.8362259  |
| C | 0.1753145  | -7.5497955 | -10.6152354 |
| N | -0.6302827 | -8.2672694 | -11.0363464 |
| C | 3.6705385  | -4.3993527 | -4.1860070  |
| C | 4.9462138  | -4.9869634 | -4.8011212  |
| H | 4.9282048  | -1.8093959 | -7.2087156  |
| H | 3.0714885  | -4.0641261 | -6.7315960  |
| H | 3.8830608  | -2.9431613 | -8.9026530  |
| H | 4.2942576  | -6.7280326 | -8.7751428  |
| H | 2.5730915  | -8.2445839 | -9.6617707  |
| H | -0.0135968 | -4.8874659 | -10.4314769 |
| H | 1.7233682  | -3.3559863 | -9.5453911  |
| H | 4.3285250  | -2.6073796 | -3.2046557  |
| H | 2.7114919  | -2.4751701 | -3.8545734  |
| H | 5.9317047  | -5.1076031 | -6.7117034  |
| H | 4.4147245  | -6.0094272 | -6.6276811  |
| H | 6.3944697  | -4.0276052 | -11.5158015 |
| H | 4.7773624  | -4.7739693 | -11.3854841 |
| H | 4.9746353  | -3.0071556 | -11.0889874 |
| H | 7.7349401  | -3.0796490 | -9.4133991  |
| H | 7.0312142  | -2.9997431 | -7.7684604  |
| H | 6.3170402  | -2.0172699 | -9.0998058  |
| H | 3.5398383  | -4.7974994 | -3.1731089  |
| H | 2.7943507  | -4.7369792 | -4.7525423  |
| H | 5.1324195  | -5.9926667 | -4.4085510  |
| H | 5.7985099  | -4.3702087 | -4.4900515  |

3\_sy\_tr\_23.log

E = -1188.211905  
H = -1187.846008  
G = -1187.916194

NImag=0

|   |           |            |             |
|---|-----------|------------|-------------|
| C | 4.8299620 | -4.3827193 | -6.4033658  |
| C | 3.9035441 | -3.4117861 | -7.0881453  |
| C | 5.3145995 | -4.0925619 | -5.1308313  |
| O | 5.9572941 | -4.8881221 | -4.3711370  |
| C | 3.8251385 | -3.5802142 | -8.6196094  |
| C | 3.0657797 | -4.7821302 | -9.1366452  |
| C | 3.5795359 | -6.0845924 | -9.0948888  |
| C | 2.8208960 | -7.1575277 | -9.5492558  |
| C | 1.5351526 | -6.9279575 | -10.0509217 |
| C | 1.0111909 | -5.6314514 | -10.1079930 |
| C | 1.7834067 | -4.5686867 | -9.6568295  |
| C | 5.0444157 | -2.6707827 | -4.5969032  |
| C | 2.4794096 | -3.3691008 | -6.4919222  |
| S | 5.5472749 | -3.6578963 | -9.2758597  |
| C | 5.2521764 | -3.2550354 | -11.0118334 |
| C | 6.2483996 | -2.1020049 | -8.6981511  |
| C | 0.7460021 | -8.0351347 | -10.5221003 |
| N | 0.1100605 | -8.9253033 | -10.9019867 |
| C | 3.5437937 | -2.3026687 | -4.3905185  |
| C | 2.5219764 | -3.2969374 | -4.9598552  |
| H | 4.8687049 | -5.4177876 | -6.7383967  |
| H | 4.2981421 | -2.3946938 | -6.9541885  |
| H | 3.3931551 | -2.6761567 | -9.0638082  |
| H | 4.5777754 | -6.2787736 | -8.7152460  |
| H | 3.2208607 | -8.1654567 | -9.5174267  |
| H | 0.0162174 | -5.4621569 | -10.5059482 |
| H | 1.3849045 | -3.5590901 | -9.7037806  |
| H | 5.5785554 | -2.5879557 | -3.6465347  |
| H | 5.5032423 | -1.9442648 | -5.2807090  |
| H | 1.9154583 | -4.2629034 | -6.7884201  |
| H | 1.9422012 | -2.4974031 | -6.8947217  |
| H | 6.2271464 | -3.1669006 | -11.4945071 |
| H | 4.6958516 | -4.0830117 | -11.4553051 |
| H | 4.6921815 | -2.3208990 | -11.0863617 |
| H | 7.1652594 | -1.9414371 | -9.2689371  |
| H | 6.4820285 | -2.2165874 | -7.6389164  |
| H | 5.5368623 | -1.2921176 | -8.8722140  |
| H | 3.3496862 | -2.2124126 | -3.3161250  |
| H | 3.3467189 | -1.3111407 | -4.8189046  |
| H | 1.5244185 | -3.0272589 | -4.5933367  |
| H | 2.7400204 | -4.2936782 | -4.5596586  |

3\_sy\_tr\_24.log

E = -1188.207351

H = -1187.841329

G = -1187.909305

NImag=0

|   |           |            |            |
|---|-----------|------------|------------|
| C | 5.2120002 | -4.1428539 | -6.5253467 |
| C | 4.6315242 | -2.9341196 | -7.2093164 |
| C | 4.5728965 | -5.1690526 | -5.8396116 |
| O | 5.1785094 | -6.2104307 | -5.4067003 |
| C | 4.0294682 | -3.1731197 | -8.6502545 |
| C | 3.2875205 | -4.4606550 | -8.9054282 |
| C | 3.9366828 | -5.7020878 | -8.8883829 |
| C | 3.2173711 | -6.8759902 | -9.0767402 |
| C | 1.8350919 | -6.8086489 | -9.2908772 |
| C | 1.1773781 | -5.5747268 | -9.3428508 |
| C | 1.9123481 | -4.4096620 | -9.1577347 |
| C | 3.0615900 | -5.1385561 | -5.5620218 |
| C | 3.6432915 | -2.0655277 | -6.4006989 |

|   |           |            |             |
|---|-----------|------------|-------------|
| S | 5.2854202 | -2.9917217 | -10.0086588 |
| C | 5.5508341 | -1.2089718 | -10.0177011 |
| C | 6.8812259 | -3.5560299 | -9.3828285  |
| C | 1.0835779 | -8.0220456 | -9.4732159  |
| N | 0.4775448 | -8.9980515 | -9.6202674  |
| C | 2.4636565 | -3.8537929 | -4.9826066  |
| C | 2.3223793 | -2.6980476 | -5.9714810  |
| H | 6.2727982 | -4.3171304 | -6.7063796  |
| H | 5.4712724 | -2.2468779 | -7.3739661  |
| H | 3.3647090 | -2.3383011 | -8.9055335  |
| H | 5.0026988 | -5.7642909 | -8.7021448  |
| H | 3.7172532 | -7.8386800 | -9.0540489  |
| H | 0.1088919 | -5.5325701 | -9.5258921  |
| H | 1.4079205 | -3.4482022 | -9.1947074  |
| H | 2.5206180 | -5.3946652 | -6.4861613  |
| H | 2.8830256 | -5.9608379 | -4.8616286  |
| H | 3.4286791 | -1.1616848 | -6.9872871  |
| H | 4.1796932 | -1.7379012 | -5.5007221  |
| H | 6.3667368 | -1.0094329 | -10.7150772 |
| H | 4.6319461 | -0.7420058 | -10.3753272 |
| H | 5.8070431 | -0.8613392 | -9.0150726  |
| H | 7.5992883 | -3.3136177 | -10.1697243 |
| H | 6.8425785 | -4.6363724 | -9.2453191  |
| H | 7.1401251 | -3.0407700 | -8.4578278  |
| H | 1.4661053 | -4.0912876 | -4.5920615  |
| H | 3.0639710 | -3.5242128 | -4.1224020  |
| H | 1.7121962 | -1.9115237 | -5.5100732  |
| H | 1.7608384 | -3.0427040 | -6.8500199  |

3\_sy\_tr\_25.log

E = -1188.209144

H = -1187.843037

G = -1187.912435

NImag=0

|   |           |            |             |
|---|-----------|------------|-------------|
| C | 5.0927603 | -3.8794145 | -6.5827369  |
| C | 4.1815254 | -2.9154716 | -7.3119764  |
| C | 5.1113317 | -4.1575317 | -5.2240844  |
| O | 5.9099764 | -4.9785371 | -4.6536458  |
| C | 4.0325513 | -3.2918463 | -8.8139574  |
| C | 3.2589308 | -4.5539501 | -9.1123672  |
| C | 3.7732135 | -5.8326424 | -8.8567138  |
| C | 2.9972131 | -6.9625681 | -9.0860473  |
| C | 1.6947277 | -6.8156752 | -9.5768827  |
| C | 1.1734644 | -5.5470567 | -9.8542443  |
| C | 1.9636075 | -4.4264100 | -9.6275501  |
| C | 4.0912541 | -3.4505188 | -4.3245276  |
| C | 2.7338169 | -2.7418767 | -6.7507033  |
| S | 5.6927551 | -3.4348485 | -9.6173355  |
| C | 5.2297109 | -3.2709219 | -11.3521700 |
| C | 6.4124952 | -1.8147838 | -9.2977427  |
| C | 0.8870457 | -7.9831580 | -9.8118566  |
| N | 0.2361290 | -8.9220119 | -10.0018250 |
| C | 2.6554786 | -3.9622385 | -4.5171761  |
| C | 2.1892112 | -3.9492810 | -5.9832417  |
| H | 5.8342243 | -4.4168914 | -7.1743675  |
| H | 4.5988751 | -1.8950185 | -7.3470996  |
| H | 3.5622643 | -2.4508697 | -9.3358015  |
| H | 4.7786465 | -5.9579649 | -8.4692615  |
| H | 3.3940326 | -7.9519367 | -8.8843207  |
| H | 0.1670705 | -5.4445872 | -10.2464301 |
| H | 1.5677445 | -3.4388958 | -9.8467241  |

|   |           |            |             |
|---|-----------|------------|-------------|
| H | 4.4005668 | -3.6077720 | -3.2866692  |
| H | 4.1139262 | -2.3687443 | -4.5081117  |
| H | 2.0643400 | -2.4925641 | -7.5828131  |
| H | 2.7178505 | -1.8655272 | -6.0938206  |
| H | 6.1529386 | -3.2122084 | -11.9313458 |
| H | 4.6749796 | -4.1682439 | -11.6323127 |
| H | 4.6227910 | -2.3733333 | -11.4868611 |
| H | 7.2755057 | -1.7191626 | -9.9596537  |
| H | 6.7395739 | -1.7932152 | -8.2571851  |
| H | 5.6744618 | -1.0369030 | -9.5042848  |
| H | 2.5716990 | -4.9801477 | -4.1163199  |
| H | 1.9815072 | -3.3342874 | -3.9200359  |
| H | 1.0932601 | -3.9375707 | -6.0116611  |
| H | 2.5035431 | -4.8712128 | -6.4836356  |

3\_sy\_tr\_26.log

E = -1188.205010

H = -1187.838874

G = -1187.908474

NImag=0

|   |           |            |             |
|---|-----------|------------|-------------|
| C | 5.2281777 | -4.1758516 | -6.5458615  |
| C | 4.6269271 | -2.9828582 | -7.2414556  |
| C | 4.7873247 | -4.8801071 | -5.4342531  |
| O | 5.4678323 | -5.8133465 | -4.8761963  |
| C | 4.0402927 | -3.2140443 | -8.6864994  |
| C | 3.2530350 | -4.4712376 | -8.9529371  |
| C | 3.8365478 | -5.7418434 | -8.8558745  |
| C | 3.0763505 | -6.8852048 | -9.0743549  |
| C | 1.7197474 | -6.7580917 | -9.3947278  |
| C | 1.1282899 | -5.4955511 | -9.5192725  |
| C | 1.9035465 | -4.3621824 | -9.3065267  |
| C | 3.4280015 | -4.5966236 | -4.7677681  |
| C | 3.5948496 | -2.1857716 | -6.4177136  |
| S | 5.3115557 | -3.0740413 | -10.0394191 |
| C | 5.6122691 | -1.2976928 | -10.0740288 |
| C | 6.8915229 | -3.6573418 | -9.3926102  |
| C | 0.9270927 | -7.9386655 | -9.6144394  |
| N | 0.2886147 | -8.8884576 | -9.7924542  |
| C | 2.2638233 | -4.2818427 | -5.7097086  |
| C | 2.2234733 | -2.8271662 | -6.1920080  |
| H | 6.1964778 | -4.5043806 | -6.9220498  |
| H | 5.4368868 | -2.2560866 | -7.4032322  |
| H | 3.4107854 | -2.3529425 | -8.9455503  |
| H | 4.8834783 | -5.8481915 | -8.5968120  |
| H | 3.5265925 | -7.8691026 | -8.9949710  |
| H | 0.0797428 | -5.4079226 | -9.7834105  |
| H | 1.4503226 | -3.3797397 | -9.4039708  |
| H | 3.2009895 | -5.5027154 | -4.1971011  |
| H | 3.5427246 | -3.7898128 | -4.0280630  |
| H | 3.4461669 | -1.2107727 | -6.8995199  |
| H | 4.0632471 | -1.9849984 | -5.4473454  |
| H | 6.4383196 | -1.1276823 | -10.7671046 |
| H | 4.7063069 | -0.8177462 | -10.4468222 |
| H | 5.8674402 | -0.9402904 | -9.0747261  |
| H | 7.6203822 | -3.4520401 | -10.1800801 |
| H | 6.8260333 | -4.7329239 | -9.2275322  |
| H | 7.1529091 | -3.1220351 | -8.4791524  |
| H | 2.3198695 | -4.9637034 | -6.5669928  |
| H | 1.3154635 | -4.5054963 | -5.2057806  |
| H | 1.7015647 | -2.2164089 | -5.4442533  |
| H | 1.6222224 | -2.7594862 | -7.1071204  |



3\_sy\_tr\_28.log

E = -1188.215766

H = -1187.849715

G = -1187.918948

NImag=0

|   |            |            |             |
|---|------------|------------|-------------|
| C | 3.5612440  | -4.6678750 | -5.7671487  |
| C | 4.8085210  | -4.7220035 | -6.6239372  |
| C | 2.9248346  | -3.5449764 | -5.2539803  |
| O | 1.8121835  | -3.5770682 | -4.6240488  |
| C | 4.4610891  | -4.1937381 | -8.0392752  |
| C | 3.3439225  | -4.9194600 | -8.7453773  |
| C | 3.2407812  | -6.3168207 | -8.7250082  |
| C | 2.2076805  | -6.9583096 | -9.3959646  |
| C | 1.2615062  | -6.1960544 | -10.0925604 |
| C | 1.3462194  | -4.7999779 | -10.1182471 |
| C | 2.3884086  | -4.1734008 | -9.4453303  |
| C | 3.5498437  | -2.1486207 | -5.4162079  |
| C | 6.0719431  | -4.0649968 | -6.0348977  |
| S | 6.0046548  | -4.1286885 | -9.1157130  |
| C | 6.5161932  | -5.8453191 | -9.2964875  |
| C | 5.3843551  | -3.7755750 | -10.7701686 |
| C | 0.1869245  | -6.8564825 | -10.7849631 |
| N | -0.6773669 | -7.3878347 | -11.3435010 |
| C | 5.0015533  | -1.9846405 | -4.9530384  |
| C | 6.0599394  | -2.5420360 | -5.9052860  |
| H | 3.0236868  | -5.6091430 | -5.6572786  |
| H | 5.0586897  | -5.7837813 | -6.7376038  |
| H | 4.2186958  | -3.1270583 | -7.9916004  |
| H | 3.9594142  | -6.9146782 | -8.1725433  |
| H | 2.1263838  | -8.0399545 | -9.3780410  |
| H | 0.6041409  | -4.2184403 | -10.6550648 |
| H | 2.4581580  | -3.0890101 | -9.4566250  |
| H | 3.4709950  | -1.8214272 | -6.4645241  |
| H | 2.9107935  | -1.4763485 | -4.8355114  |
| H | 6.9549126  | -4.3587369 | -6.6215566  |
| H | 6.2168533  | -4.5047847 | -5.0408519  |
| H | 7.4039556  | -5.8378788 | -9.9324992  |
| H | 6.7745517  | -6.2298998 | -8.3081471  |
| H | 5.7206253  | -6.4319856 | -9.7581472  |
| H | 6.2555748  | -3.7184756 | -11.4260603 |
| H | 4.8827827  | -2.8063319 | -10.7373159 |
| H | 4.7036310  | -4.5635995 | -11.0959639 |
| H | 5.2005245  | -0.9140405 | -4.8199179  |
| H | 5.1212632  | -2.4496006 | -3.9641128  |
| H | 7.0504882  | -2.2287624 | -5.5539052  |
| H | 5.9305486  | -2.0721838 | -6.8916882  |

3\_sy\_tr\_28\_ts1.log

E = -1188.184841

H = -1187.821003

G = -1187.890035

NImag=1

|   |            |            |            |
|---|------------|------------|------------|
| C | 0.9325437  | -1.4858629 | -1.1322253 |
| C | 1.4914877  | -0.2027690 | -1.0951767 |
| C | 1.2328856  | -2.6345855 | -0.3289453 |
| O | 0.6567494  | -3.7255665 | -0.5169529 |
| C | 0.5276990  | 0.9418964  | 0.4440946  |
| C | -0.8673626 | 0.5584073  | 0.3475812  |
| C | -1.8255698 | 1.1794550  | -0.4826585 |

|   |            |            |            |
|---|------------|------------|------------|
| C | -3.1044442 | 0.6633325  | -0.6178040 |
| C | -3.4643397 | -0.5094115 | 0.0640690  |
| C | -2.5253637 | -1.1573572 | 0.8797735  |
| C | -1.2529918 | -0.6266831 | 1.0153011  |
| C | 2.2189671  | -2.5564925 | 0.8312330  |
| C | 2.9492030  | 0.1224209  | -0.8200733 |
| S | 1.0458238  | 2.6181603  | 0.3932015  |
| C | 1.0095368  | 3.2141994  | -1.3156727 |
| C | -0.2245998 | 3.6870996  | 1.1248974  |
| C | -4.7862469 | -1.0437315 | -0.0780856 |
| N | -5.8571409 | -1.4746175 | -0.1933603 |
| C | 3.5979849  | -1.9605482 | 0.5363523  |
| C | 3.6113379  | -0.4381477 | 0.4342408  |
| H | 0.0601317  | -1.6221917 | -1.7696354 |
| H | 1.0854667  | 0.4448411  | -1.8739748 |
| H | 1.0457320  | 0.4986497  | 1.2924605  |
| H | -1.5787601 | 2.0716630  | -1.0462926 |
| H | -3.8275641 | 1.1597628  | -1.2572693 |
| H | -2.7994532 | -2.0677092 | 1.4040686  |
| H | -0.5327285 | -1.1280689 | 1.6558139  |
| H | 1.7447139  | -1.9691632 | 1.6325466  |
| H | 2.3257633  | -3.5795042 | 1.2031314  |
| H | 3.0824793  | 1.2103968  | -0.8264986 |
| H | 3.5030479  | -0.2458744 | -1.6967859 |
| H | 1.2654316  | 4.2748066  | -1.2679361 |
| H | 1.7756524  | 2.6825043  | -1.8807668 |
| H | 0.0296176  | 3.0817666  | -1.7712277 |
| H | 0.1689678  | 4.7058599  | 1.1149884  |
| H | -0.3681291 | 3.3501308  | 2.1527643  |
| H | -1.1564765 | 3.6291055  | 0.5622451  |
| H | 4.2713690  | -2.2576610 | 1.3482818  |
| H | 4.0059094  | -2.3994760 | -0.3844771 |
| H | 4.6503094  | -0.0882765 | 0.4395772  |
| H | 3.1397638  | -0.0157853 | 1.3315848  |

3\_sy\_tr\_2\_ts1.log

E = -1188.183718

H = -1187.820554

G = -1187.891680

NImag=1

|   |            |            |            |
|---|------------|------------|------------|
| C | 2.3986178  | -0.6437668 | 1.3593407  |
| C | 1.0677415  | -0.7969794 | 0.9470559  |
| C | 3.5669128  | -0.7524516 | 0.5423150  |
| O | 4.7223555  | -0.6629845 | 1.0074324  |
| C | -0.0048552 | 1.0474222  | 0.6663976  |
| C | -1.3625029 | 0.6203823  | 0.4154065  |
| C | -1.9344195 | 0.4869590  | -0.8736899 |
| C | -3.1963959 | -0.0537468 | -1.0474537 |
| C | -3.9401040 | -0.4802221 | 0.0649150  |
| C | -3.3992508 | -0.3473850 | 1.3554454  |
| C | -2.1389988 | 0.1961439  | 1.5227615  |
| C | 3.3967907  | -0.9732247 | -0.9542119 |
| C | 0.6520689  | -1.5593525 | -0.3074479 |
| S | 0.7618882  | 1.9802636  | -0.6161698 |
| C | -0.1318962 | 3.5565863  | -0.7262455 |
| C | 2.2667156  | 2.5586708  | 0.1874844  |
| C | -5.2463459 | -1.0362513 | -0.1142753 |
| N | -6.3054910 | -1.4882438 | -0.2595521 |
| C | 2.8593664  | -2.3658388 | -1.3243289 |
| C | 1.5633753  | -2.7605834 | -0.5986078 |
| H | 2.5809203  | -0.3868630 | 2.4014843  |

|   |            |            |            |
|---|------------|------------|------------|
| H | 0.3720238  | -0.9365894 | 1.7745430  |
| H | 0.1823818  | 1.5015131  | 1.6391245  |
| H | -1.3853231 | 0.7995651  | -1.7583913 |
| H | -3.6149050 | -0.1485449 | -2.0446604 |
| H | -3.9756250 | -0.6679680 | 2.2178645  |
| H | -1.7307382 | 0.3015317  | 2.5242530  |
| H | 2.7164717  | -0.2101843 | -1.3551381 |
| H | 4.3715387  | -0.8175548 | -1.4245248 |
| H | 0.6307512  | -0.9097696 | -1.1928097 |
| H | -0.3768904 | -1.9023558 | -0.1653270 |
| H | 0.4203753  | 4.2062622  | -1.4095457 |
| H | -1.1250606 | 3.3497045  | -1.1282719 |
| H | -0.1978910 | 3.9943648  | 0.2716860  |
| H | 2.7546600  | 3.2471317  | -0.5044207 |
| H | 2.9053344  | 1.6983414  | 0.3820210  |
| H | 2.0007212  | 3.0629644  | 1.1189043  |
| H | 2.6820634  | -2.3707452 | -2.4061813 |
| H | 3.6344162  | -3.1157454 | -1.1292454 |
| H | 1.7949142  | -3.2658512 | 0.3450106  |
| H | 1.0184005  | -3.4836337 | -1.2151993 |

3\_sy\_tr\_2\_ts1\_rot1.log

E = -1188.189309

H = -1187.825962

G = -1187.895467

NImag=1

|   |            |            |            |
|---|------------|------------|------------|
| C | 0.7445694  | -1.6837168 | -1.1380193 |
| C | 1.3375045  | -1.5395531 | 0.1203183  |
| C | -0.6426502 | -1.9208843 | -1.4120971 |
| O | -1.0704031 | -2.1093678 | -2.5695028 |
| C | 1.5687969  | 0.5577224  | 0.6423703  |
| C | 0.2306869  | 1.0621945  | 0.4918247  |
| C | -0.3699793 | 1.2762733  | -0.7740075 |
| C | -1.7160941 | 1.5898385  | -0.8830519 |
| C | -2.5071219 | 1.7038251  | 0.2689009  |
| C | -1.9269380 | 1.5236408  | 1.5394652  |
| C | -0.5849658 | 1.2137848  | 1.6425850  |
| C | -1.6264092 | -1.9909899 | -0.2518460 |
| C | 0.7079053  | -2.0137861 | 1.4215729  |
| S | 2.7193871  | 1.0959510  | -0.5790042 |
| C | 3.0242133  | 2.8478323  | -0.2337355 |
| C | 4.2730594  | 0.3977984  | 0.0081931  |
| C | -3.8978477 | 2.0240738  | 0.1548194  |
| N | -5.0258351 | 2.2819634  | 0.0645560  |
| C | -1.4327850 | -3.2122634 | 0.6640036  |
| C | -0.0186999 | -3.3586953 | 1.2575162  |
| H | 1.3845940  | -1.6186324 | -2.0169266 |
| H | 2.4183623  | -1.6658801 | 0.1170201  |
| H | 2.0047680  | 0.6028203  | 1.6412811  |
| H | 0.2180405  | 1.1931120  | -1.6827425 |
| H | -2.1632131 | 1.7398001  | -1.8611704 |
| H | -2.5360232 | 1.6320361  | 2.4315535  |
| H | -0.1402980 | 1.0773489  | 2.6246108  |
| H | -1.5432813 | -1.0778318 | 0.3476049  |
| H | -2.6331465 | -2.0123729 | -0.6796113 |
| H | -0.0014878 | -1.2780282 | 1.8183166  |
| H | 1.5047644  | -2.1062503 | 2.1664501  |
| H | 3.8003418  | 3.1991096  | -0.9173925 |
| H | 2.0904878  | 3.3808115  | -0.4234602 |
| H | 3.3318447  | 2.9603133  | 0.8076556  |
| H | 5.0750426  | 0.9047096  | -0.5311194 |

|   |            |            |            |
|---|------------|------------|------------|
| H | 4.2897883  | -0.6659816 | -0.2268791 |
| H | 4.3595253  | 0.5680368  | 1.0832682  |
| H | -2.1565396 | -3.1186480 | 1.4821961  |
| H | -1.6984170 | -4.1237416 | 0.1159679  |
| H | 0.5917758  | -4.0144906 | 0.6274345  |
| H | -0.0937936 | -3.8480165 | 2.2349004  |

3\_sy\_tr\_3.log

E = -1188.216597  
H = -1187.850598  
G = -1187.919563

NImag=0

|   |           |            |             |
|---|-----------|------------|-------------|
| C | 4.9645524 | -4.2702737 | -6.5089236  |
| C | 3.9632481 | -3.3274661 | -7.1340355  |
| C | 5.4064340 | -4.1577511 | -5.1983020  |
| O | 6.1957044 | -4.9688870 | -4.6078991  |
| C | 3.8422280 | -3.5206602 | -8.6623940  |
| C | 3.0993868 | -4.7536563 | -9.1314883  |
| C | 1.7916120 | -4.5834913 | -9.6030274  |
| C | 1.0300051 | -5.6735915 | -10.0049668 |
| C | 1.5903853 | -6.9545178 | -9.9507403  |
| C | 2.9030021 | -7.1409868 | -9.5042106  |
| C | 3.6503779 | -6.0414116 | -9.0978783  |
| C | 4.8686489 | -2.9877897 | -4.3639589  |
| C | 2.5422950 | -3.3686279 | -6.5273439  |
| S | 5.5314286 | -3.5321211 | -9.4054480  |
| C | 5.1305134 | -3.2032954 | -11.1345719 |
| C | 6.1722103 | -1.9250016 | -8.9033067  |
| C | 0.8123357 | -8.0898671 | -10.3704622 |
| N | 0.1851951 | -9.0028206 | -10.7085473 |
| C | 3.3650375 | -3.1093092 | -4.0661565  |
| C | 2.4474995 | -2.6233162 | -5.1927466  |
| H | 5.2569976 | -5.1669027 | -7.0503346  |
| H | 4.2955812 | -2.2825284 | -7.0167660  |
| H | 3.3579880 | -2.6384231 | -9.0946530  |
| H | 1.3641077 | -3.5862520 | -9.6529995  |
| H | 0.0153397 | -5.5365721 | -10.3636534 |
| H | 3.3329296 | -8.1366289 | -9.4774339  |
| H | 4.6697464 | -6.2060591 | -8.7644814  |
| H | 5.4345834 | -2.9825866 | -3.4274981  |
| H | 5.0546055 | -2.0265670 | -4.8668371  |
| H | 2.2365236 | -4.4163403 | -6.4068416  |
| H | 1.8264111 | -2.8996800 | -7.2177894  |
| H | 6.0743639 | -3.0626904 | -11.6643683 |
| H | 4.6141765 | -4.0808187 | -11.5284206 |
| H | 4.5040308 | -2.3121957 | -11.2066159 |
| H | 7.0596571 | -1.7370892 | -9.5108099  |
| H | 6.4480924 | -1.9923886 | -7.8500974  |
| H | 5.4139041 | -1.1582833 | -9.0752156  |
| H | 3.1321717 | -4.1546683 | -3.8187573  |
| H | 3.1283481 | -2.5187185 | -3.1724460  |
| H | 2.6667734 | -1.5616608 | -5.3782347  |
| H | 1.4080680 | -2.6673044 | -4.8452381  |

3\_sy\_tr\_30.log

E = -1188.203749  
H = -1187.837633  
G = -1187.908469

NImag=0

|   |           |            |            |
|---|-----------|------------|------------|
| C | 5.0106853 | -4.2487694 | -6.6356290 |
|---|-----------|------------|------------|

|   |           |            |             |
|---|-----------|------------|-------------|
| C | 3.7838034 | -3.4195227 | -6.9319867  |
| C | 5.8022546 | -4.0661907 | -5.5155951  |
| O | 6.8753154 | -4.7191797 | -5.2626883  |
| C | 3.3041607 | -3.4174845 | -8.3885452  |
| C | 2.7178494 | -4.6708997 | -9.0111610  |
| C | 2.9623508 | -5.9544423 | -8.5108265  |
| C | 2.4057382 | -7.0700622 | -9.1276569  |
| C | 1.6024575 | -6.9041339 | -10.2602423 |
| C | 1.3406902 | -5.6266360 | -10.7689365 |
| C | 1.8960165 | -4.5219297 | -10.1374899 |
| C | 5.4408474 | -3.0079901 | -4.4472250  |
| C | 2.5620390 | -3.7041543 | -6.0255407  |
| S | 4.5644539 | -2.7887649 | -9.6196324  |
| C | 5.4709232 | -1.5117486 | -8.7314606  |
| C | 5.8284552 | -4.0585269 | -9.8355448  |
| C | 1.0331084 | -8.0574165 | -10.9059852 |
| N | 0.5753247 | -8.9848484 | -11.4268879 |
| C | 3.9714992 | -2.5913256 | -4.2064055  |
| C | 2.9511974 | -3.6870019 | -4.5396304  |
| H | 5.3157951 | -5.0303021 | -7.3251305  |
| H | 4.0196785 | -2.3626826 | -6.7434193  |
| H | 2.5506758 | -2.6260672 | -8.4905697  |
| H | 3.5764006 | -6.0903596 | -7.6285077  |
| H | 2.5936403 | -8.0635640 | -8.7345182  |
| H | 0.7062644 | -5.5051050 | -11.6404664 |
| H | 1.6798639 | -3.5283671 | -10.5223238 |
| H | 5.8319348 | -3.4381016 | -3.5182516  |
| H | 6.0543663 | -2.1155581 | -4.6394365  |
| H | 2.1059669 | -4.6697475 | -6.2740083  |
| H | 1.8037107 | -2.9294334 | -6.2108837  |
| H | 6.2322887 | -1.1412013 | -9.4212752  |
| H | 4.7702545 | -0.7107191 | -8.4897456  |
| H | 5.9250597 | -1.9420007 | -7.8367667  |
| H | 6.3992296 | -3.7607981 | -10.7174947 |
| H | 5.3261806 | -5.0089113 | -10.0290740 |
| H | 6.4606081 | -4.1150325 | -8.9513192  |
| H | 3.8744994 | -2.3195346 | -3.1492133  |
| H | 3.7189736 | -1.6840929 | -4.7691412  |
| H | 2.0414290 | -3.5509220 | -3.9440383  |
| H | 3.3683091 | -4.6601715 | -4.2532463  |

3\_sy\_tr\_31.log

E = -1188.201950

H = -1187.835845

G = -1187.904686

NImag=0

|   |           |            |             |
|---|-----------|------------|-------------|
| C | 4.1156681 | -2.4333231 | -6.3075316  |
| C | 3.8456562 | -3.8194436 | -6.8699483  |
| C | 4.8068176 | -2.0833204 | -5.1610379  |
| O | 5.1192589 | -0.8772765 | -4.8484346  |
| C | 3.5467864 | -3.7032997 | -8.3761698  |
| C | 2.7604367 | -4.8290609 | -9.0325550  |
| C | 2.5554162 | -6.0638123 | -8.4075327  |
| C | 1.8163594 | -7.0609213 | -9.0365262  |
| C | 1.2765867 | -6.8248768 | -10.3039073 |
| C | 1.4610439 | -5.5911172 | -10.9390592 |
| C | 2.1966331 | -4.6045959 | -10.2973530 |
| C | 5.2424463 | -3.1443060 | -4.1330215  |
| C | 4.9388414 | -4.8503903 | -6.5186317  |
| S | 4.9794125 | -3.3962994 | -9.5402726  |
| C | 6.1252152 | -2.2265898 | -8.7835233  |

|   |            |            |             |
|---|------------|------------|-------------|
| C | 5.9779378  | -4.8991767 | -9.5951391  |
| C | 0.5152937  | -7.8560194 | -10.9577511 |
| N | -0.0966684 | -8.6857568 | -11.4849961 |
| C | 4.3919275  | -4.4147923 | -4.0573073  |
| C | 4.7379763  | -5.4539098 | -5.1262473  |
| H | 3.8142089  | -1.5972793 | -6.9399326  |
| H | 2.8921662  | -4.2309946 | -6.4890820  |
| H | 2.9822511  | -2.7772525 | -8.5408010  |
| H | 2.9513208  | -6.2616718 | -7.4183173  |
| H | 1.6580475  | -8.0158340 | -8.5465631  |
| H | 1.0255371  | -5.4088287 | -11.9157547 |
| H | 2.3217754  | -3.6409724 | -10.7844177 |
| H | 6.2978480  | -3.4052499 | -4.3078100  |
| H | 5.2176493  | -2.6265155 | -3.1679769  |
| H | 5.9149991  | -4.3521749 | -6.5618675  |
| H | 4.9750155  | -5.6701871 | -7.2431790  |
| H | 6.9473681  | -2.1348133 | -9.4983348  |
| H | 5.6113128  | -1.2709408 | -8.6795708  |
| H | 6.4739973  | -2.5937365 | -7.8201548  |
| H | 6.6103219  | -4.8016940 | -10.4797802 |
| H | 5.3050415  | -5.7504280 | -9.7182950  |
| H | 6.5826983  | -4.9940947 | -8.6947972  |
| H | 4.5037250  | -4.8781914 | -3.0698519  |
| H | 3.3344539  | -4.1331665 | -4.1459024  |
| H | 3.9404889  | -6.2077543 | -5.1699839  |
| H | 5.6562279  | -5.9822316 | -4.8404815  |

3\_sy\_tr\_32.log

E = -1188.204204

H = -1187.838087

G = -1187.906718

NImag=0

|   |            |            |             |
|---|------------|------------|-------------|
| C | 4.3473970  | -2.4072853 | -6.3972320  |
| C | 4.0853850  | -3.7909935 | -6.9595962  |
| C | 4.3383276  | -2.1096039 | -5.0468661  |
| O | 4.5637527  | -0.9578091 | -4.5327169  |
| C | 3.7317514  | -3.7003369 | -8.4548396  |
| C | 2.8530490  | -4.7966544 | -9.0401452  |
| C | 2.6342603  | -6.0127832 | -8.3839703  |
| C | 1.8114446  | -6.9822041 | -8.9487088  |
| C | 1.2007498  | -6.7366571 | -10.1819394 |
| C | 1.3991613  | -5.5206831 | -10.8466469 |
| C | 2.2198244  | -4.5617398 | -10.2696232 |
| C | 4.0620919  | -3.2563227 | -4.0625639  |
| C | 5.1647220  | -4.8439755 | -6.6126148  |
| S | 5.1235608  | -3.5179551 | -9.6889340  |
| C | 6.3371045  | -2.3699707 | -9.0117399  |
| C | 6.0572098  | -5.0630478 | -9.7140217  |
| C | 0.3502313  | -7.7386023 | -10.7679715 |
| N | -0.3338026 | -8.5445209 | -11.2407819 |
| C | 5.1384653  | -4.3526396 | -4.0592279  |
| C | 5.0160053  | -5.3820447 | -5.1866259  |
| H | 4.5669202  | -1.5988887 | -7.0924494  |
| H | 3.1459342  | -4.1773819 | -6.5274241  |
| H | 3.2185514  | -2.7452963 | -8.6235098  |
| H | 3.0834220  | -6.2158600 | -7.4186236  |
| H | 1.6411152  | -7.9225876 | -8.4352869  |
| H | 0.9092253  | -5.3303888 | -11.7956021 |
| H | 2.3581744  | -3.6113810 | -10.7788327 |
| H | 3.9965344  | -2.8017552 | -3.0693877  |
| H | 3.0868496  | -3.7216513 | -4.2736023  |

|   |           |            |             |
|---|-----------|------------|-------------|
| H | 6.1601773 | -4.3959230 | -6.7278768  |
| H | 5.1187833 | -5.7013848 | -7.2944025  |
| H | 7.1737991 | -2.3869368 | -9.7145299  |
| H | 5.8868776 | -1.3770711 | -8.9954195  |
| H | 6.6530208 | -2.6798521 | -8.0166370  |
| H | 6.6523817 | -5.0317559 | -10.6288953 |
| H | 5.3462033 | -5.8901040 | -9.7681154  |
| H | 6.6978522 | -5.1416267 | -8.8375094  |
| H | 6.1314387 | -3.8822417 | -4.0942144  |
| H | 5.0871391 | -4.8986548 | -3.1089262  |
| H | 4.0342952 | -5.8724844 | -5.1041942  |
| H | 5.7678134 | -6.1653438 | -5.0316945  |

3\_sy\_tr\_33.log

E = -1188.213534

H = -1187.847310

G = -1187.915842

NImag=0

|   |            |            |             |
|---|------------|------------|-------------|
| C | 3.4218956  | -4.3785213 | -5.8478114  |
| C | 4.7083455  | -4.5397747 | -6.6319960  |
| C | 3.0551954  | -3.4015871 | -4.9305455  |
| O | 1.9924979  | -3.4616553 | -4.2188569  |
| C | 4.4639447  | -4.1870566 | -8.1220104  |
| C | 3.3488522  | -4.9437600 | -8.7965362  |
| C | 3.1671244  | -6.3184882 | -8.5950749  |
| C | 2.1444025  | -6.9980661 | -9.2445984  |
| C | 1.2880204  | -6.2957517 | -10.1013517 |
| C | 1.4483552  | -4.9209151 | -10.3048610 |
| C | 2.4792757  | -4.2564781 | -9.6513295  |
| C | 3.9135899  | -2.1453212 | -4.6958176  |
| C | 5.9270201  | -3.7999843 | -6.0527113  |
| S | 6.0665436  | -4.3632426 | -9.0920277  |
| C | 6.4781439  | -6.1146383 | -9.0138032  |
| C | 5.5652945  | -4.2081226 | -10.8156857 |
| C | 0.2274627  | -6.9957863 | -10.7765240 |
| N | -0.6249078 | -7.5591274 | -11.3217744 |
| C | 4.6361031  | -1.5743496 | -5.9170924  |
| C | 5.9539461  | -2.2815082 | -6.2530571  |
| H | 2.7206334  | -5.2076965 | -5.9415316  |
| H | 4.9655067  | -5.6078231 | -6.6059399  |
| H | 4.2882311  | -3.1111059 | -8.2261299  |
| H | 3.8156926  | -6.8666167 | -7.9183780  |
| H | 2.0029525  | -8.0622085 | -9.0877164  |
| H | 0.7739685  | -4.3846463 | -10.9641246 |
| H | 2.6096197  | -3.1884938 | -9.8033118  |
| H | 3.2178388  | -1.3989928 | -4.2991577  |
| H | 4.6369487  | -2.3462344 | -3.8910049  |
| H | 6.8556667  | -4.2240606 | -6.4600234  |
| H | 5.9472842  | -4.0259061 | -4.9810817  |
| H | 7.3800994  | -6.2442127 | -9.6157208  |
| H | 6.6899354  | -6.3706117 | -7.9742666  |
| H | 5.6619744  | -6.7158324 | -9.4170710  |
| H | 6.4742794  | -4.2966453 | -11.4144206 |
| H | 5.1304109  | -3.2156150 | -10.9483946 |
| H | 4.8516926  | -4.9923611 | -11.0735952 |
| H | 3.9510766  | -1.6171774 | -6.7735789  |
| H | 4.8486354  | -0.5110287 | -5.7539422  |
| H | 6.7505805  | -1.8799364 | -5.6147266  |
| H | 6.2445669  | -2.0355600 | -7.2832184  |

3\_sy\_tr\_3\_r.log

E = -1188.211486  
H = -1187.845714  
G = -1187.915408

NImag=0

|   |            |            |            |
|---|------------|------------|------------|
| C | -1.1307205 | -1.0911551 | 0.3823396  |
| C | -1.5255489 | 0.2244797  | -0.2625034 |
| C | -1.9737614 | -1.8905274 | 1.1347664  |
| O | -1.6591885 | -3.0113869 | 1.6647655  |
| C | -0.2035761 | 0.8566939  | -0.7438573 |
| C | 0.7560090  | 1.1752597  | 0.3784625  |
| C | 2.0813795  | 0.7407201  | 0.2898627  |
| C | 2.9909695  | 1.0278684  | 1.3017997  |
| C | 2.5668294  | 1.7691770  | 2.4093250  |
| C | 1.2435039  | 2.2189027  | 2.5073504  |
| C | 0.3449266  | 1.9172174  | 1.4932935  |
| C | -3.4246093 | -1.4277869 | 1.3114985  |
| C | -2.5750305 | 0.0942091  | -1.3834847 |
| S | -0.5304876 | 2.4318511  | -1.7063287 |
| C | 1.0233300  | 3.3472179  | -1.6142072 |
| C | -0.4108134 | 1.8624185  | -3.4185716 |
| C | 3.5004419  | 2.0759025  | 3.4602568  |
| N | 4.2517492  | 2.3237524  | 4.3060342  |
| C | -4.2098735 | -1.4186938 | -0.0083049 |
| C | -3.9930260 | -0.1672815 | -0.8622943 |
| H | -0.1149995 | -1.4482846 | 0.2115436  |
| H | -1.9568960 | 0.9193464  | 0.4785200  |
| H | 0.2874725  | 0.2033137  | -1.4749701 |
| H | 2.4021487  | 0.1681871  | -0.5758329 |
| H | 4.0181795  | 0.6847380  | 1.2364131  |
| H | 0.9277845  | 2.7944880  | 3.3710424  |
| H | -0.6796724 | 2.2686299  | 1.5772916  |
| H | -3.8916891 | -2.1167832 | 2.0217220  |
| H | -3.4645688 | -0.4206342 | 1.7536266  |
| H | -2.2615995 | -0.6966160 | -2.0786264 |
| H | -2.6515582 | 1.0252010  | -1.9635028 |
| H | 0.9279763  | 4.1683202  | -2.3279056 |
| H | 1.1357516  | 3.7448496  | -0.6054546 |
| H | 1.8567165  | 2.6956198  | -1.8830657 |
| H | -0.5193519 | 2.7417201  | -4.0562256 |
| H | -1.2190394 | 1.1576026  | -3.6106445 |
| H | 0.5627823  | 1.3908802  | -3.5647524 |
| H | -3.9550714 | -2.3183751 | -0.5858979 |
| H | -5.2832863 | -1.4823025 | 0.2098193  |
| H | -4.2993569 | 0.7065171  | -0.2688707 |
| H | -4.6693177 | -0.2052899 | -1.7248373 |

3\_sy\_tr\_3\_ts1.log

E = -1188.149303  
H = -1187.787588  
G = -1187.859282

NImag=1

|   |            |            |            |
|---|------------|------------|------------|
| C | -1.6274688 | -0.5095592 | 0.9063729  |
| C | -1.3666532 | -0.4045229 | -0.4353827 |
| C | -3.0282915 | -0.7054158 | 1.2807668  |
| O | -3.4641019 | -0.6793942 | 2.4318230  |
| C | 0.2580299  | 1.4472703  | -0.8780711 |
| C | 1.4009944  | 0.6955625  | -0.4926822 |
| C | 2.1780651  | 0.0509617  | -1.4996048 |
| C | 3.2356938  | -0.7756115 | -1.1848852 |
| C | 3.5829702  | -1.0045485 | 0.1622056  |



|   |            |            |            |
|---|------------|------------|------------|
| C | 2.8399139  | -0.3735875 | 1.1760400  |
| C | 1.7813070  | 0.4565927  | 0.8599437  |
| C | -3.8537617 | -1.3173998 | 0.1408922  |
| C | -0.7553902 | -1.5138204 | -1.2090924 |
| S | -0.4243789 | 2.5676859  | 0.2485851  |
| C | 0.3018067  | 4.1893843  | -0.1232856 |
| C | -2.0955811 | 2.8578800  | -0.3642364 |
| C | 4.6794107  | -1.8552973 | 0.4923763  |
| N | 5.5722056  | -2.5495348 | 0.7603201  |
| C | -3.1155354 | -2.5420144 | -0.4869932 |
| C | -2.0535710 | -2.3055120 | -1.5912346 |
| H | -0.9013828 | -0.9791224 | 1.5713519  |
| H | -2.1104438 | 0.1243365  | -1.0339576 |
| H | 0.0985726  | 1.7002623  | -1.9235482 |
| H | 1.9232184  | 0.2178986  | -2.5427228 |
| H | 3.8084820  | -1.2510937 | -1.9758141 |
| H | 3.1024356  | -0.5412242 | 2.2166498  |
| H | 1.2319300  | 0.9255412  | 1.6707076  |
| H | -4.8133527 | -1.6373148 | 0.5573918  |
| H | -4.0630087 | -0.5678550 | -0.6337449 |
| H | -0.0845859 | -2.1226576 | -0.5921481 |
| H | -0.2395280 | -1.2144925 | -2.1268947 |
| H | -0.1613301 | 4.9330168  | 0.5295610  |
| H | 1.3696284  | 4.1158683  | 0.0896455  |
| H | 0.1329475  | 4.4281137  | -1.1753020 |
| H | -2.4548012 | 3.7776935  | 0.1010585  |
| H | -2.7235428 | 2.0212778  | -0.0580559 |
| H | -2.0671199 | 2.9601148  | -1.4509614 |
| H | -2.6649316 | -3.1248969 | 0.3276607  |
| H | -3.8800257 | -3.1860905 | -0.9359621 |
| H | -2.5336817 | -1.7663700 | -2.4176180 |
| H | -1.7537840 | -3.2849488 | -1.9815605 |

3\_sy\_tr\_3\_ts2.log

E = -1188.189189

H = -1187.825576

G = -1187.896800

NImag=1

|   |            |            |            |
|---|------------|------------|------------|
| C | 1.6572033  | -0.8187644 | 1.1515143  |
| C | 1.5554669  | 0.2110049  | 0.0617235  |
| C | 2.3601135  | -2.0333693 | 0.9233181  |
| O | 2.5249532  | -2.9244425 | 1.7853603  |
| C | 0.2300658  | 0.6219578  | 0.5723614  |
| C | -1.0124016 | -0.0735327 | 0.1701781  |
| C | -2.0540057 | -0.1955368 | 1.1021726  |
| C | -3.2559024 | -0.7935279 | 0.7506461  |
| C | -3.4269792 | -1.2665792 | -0.5567277 |
| C | -2.4024365 | -1.1378836 | -1.5044826 |
| C | -1.2049183 | -0.5396892 | -1.1398554 |
| C | 3.1493572  | -2.1230262 | -0.3855013 |
| C | 2.7488641  | 1.1388748  | -0.1360773 |
| S | -0.2231566 | 2.7306552  | -0.4143885 |
| C | -1.9582311 | 2.9529513  | 0.0379942  |
| C | 0.5429849  | 3.7758585  | 0.8461846  |
| C | -4.6700393 | -1.8821038 | -0.9343399 |
| N | -5.6720781 | -2.3774175 | -1.2387098 |
| C | 4.2336809  | -1.0184804 | -0.4407230 |
| C | 3.8081960  | 0.3730308  | -0.9488236 |
| H | 1.5808445  | -0.4926668 | 2.1862575  |
| H | 1.3907508  | -0.3093727 | -0.8877567 |
| H | 0.1986375  | 1.0867628  | 1.5578994  |

|   |            |            |            |
|---|------------|------------|------------|
| H | -1.9111514 | 0.1752758  | 2.1133001  |
| H | -4.0572787 | -0.8945448 | 1.4751811  |
| H | -2.5532236 | -1.4959910 | -2.5175172 |
| H | -0.4253280 | -0.4209534 | -1.8859093 |
| H | 3.6267430  | -3.1067858 | -0.4071293 |
| H | 2.4961581  | -2.0530559 | -1.2648694 |
| H | 3.1419834  | 1.4593687  | 0.8369185  |
| H | 2.4809994  | 2.0410952  | -0.7025413 |
| H | -2.2371387 | 3.9979288  | -0.1151798 |
| H | -2.5611237 | 2.3157935  | -0.6124740 |
| H | -2.1134744 | 2.6724599  | 1.0830678  |
| H | 0.1893404  | 4.8022791  | 0.7274030  |
| H | 1.6243124  | 3.7465004  | 0.7028733  |
| H | 0.2899625  | 3.4062244  | 1.8433600  |
| H | 4.6856647  | -0.9255680 | 0.5565535  |
| H | 5.0326853  | -1.3632250 | -1.1076268 |
| H | 3.4175044  | 0.2523968  | -1.9692825 |
| H | 4.7090402  | 0.9914590  | -1.0345536 |

3\_sy\_tr\_4.log

E = -1188.210041

H = -1187.844366

G = -1187.914807

NImag=0

|   |            |            |             |
|---|------------|------------|-------------|
| C | 4.4201655  | -2.4482336 | -6.5237012  |
| C | 4.0738462  | -3.8534868 | -6.9747410  |
| C | 4.2189749  | -1.9656290 | -5.2425546  |
| O | 4.4818780  | -0.7771194 | -4.8448833  |
| C | 4.0978211  | -3.9351326 | -8.5270198  |
| C | 3.1082402  | -4.9281678 | -9.1011711  |
| C | 3.3530552  | -6.3043643 | -9.1824838  |
| C | 2.3806063  | -7.1655876 | -9.6786684  |
| C | 1.1498969  | -6.6474951 | -10.0948271 |
| C | 0.8914361  | -5.2735906 | -10.0216578 |
| C | 1.8739035  | -4.4245404 | -9.5296722  |
| C | 3.6589253  | -2.9322559 | -4.1902411  |
| C | 4.8986481  | -4.9815591 | -6.3173295  |
| S | 5.7701156  | -4.3588861 | -9.1905788  |
| C | 5.5154837  | -4.0694936 | -10.9528665 |
| C | 6.7934099  | -2.9344170 | -8.7767023  |
| C | 0.1426709  | -7.5350760 | -10.6124070 |
| N | -0.6682306 | -8.2488844 | -11.0295805 |
| C | 4.5794358  | -4.1220759 | -3.8803805  |
| C | 4.4785581  | -5.2801827 | -4.8756161  |
| H | 4.8200025  | -1.7571190 | -7.2636073  |
| H | 3.0203131  | -4.0818492 | -6.7359992  |
| H | 3.8829154  | -2.9454505 | -8.9437251  |
| H | 4.3046556  | -6.7260288 | -8.8717169  |
| H | 2.5731601  | -8.2311011 | -9.7451002  |
| H | -0.0636823 | -4.8801053 | -10.3531862 |
| H | 1.6839911  | -3.3563144 | -9.4769540  |
| H | 3.4959465  | -2.3425019 | -3.2831216  |
| H | 2.6788866  | -3.3207748 | -4.5081999  |
| H | 5.9644625  | -4.7103119 | -6.3414672  |
| H | 4.7864090  | -5.9171191 | -6.8813265  |
| H | 6.4990158  | -4.1028439 | -11.4252352 |
| H | 4.8897348  | -4.8734183 | -11.3428389 |
| H | 5.0454989  | -3.0942390 | -11.0954380 |
| H | 7.7375655  | -3.0780182 | -9.3066313  |
| H | 6.9597572  | -2.9369469 | -7.6993782  |
| H | 6.2978542  | -2.0178322 | -9.1009535  |

|   |           |            |            |
|---|-----------|------------|------------|
| H | 5.6190351 | -3.7700833 | -3.8205201 |
| H | 4.3279462 | -4.5190324 | -2.8889770 |
| H | 3.4372004 | -5.6332931 | -4.8899725 |
| H | 5.0846909 | -6.1174391 | -4.5090687 |

3\_sy\_tr\_4\_ts1.log

E = -1188.147624  
H = -1187.785619  
G = -1187.857305

NImag=1

|   |            |            |            |
|---|------------|------------|------------|
| C | -2.7176401 | -0.0433175 | -0.6727787 |
| C | -1.5360326 | -0.1391507 | 0.0232805  |
| C | -3.2355705 | -1.2924413 | -1.2248920 |
| O | -4.2259406 | -1.3788493 | -1.9538238 |
| C | 0.2184778  | 1.4332499  | -0.6071432 |
| C | 1.3287630  | 0.5697725  | -0.3711732 |
| C | 2.0544063  | 0.4999966  | 0.8510297  |
| C | 3.0554370  | -0.4329302 | 1.0440171  |
| C | 3.3868370  | -1.3470742 | 0.0277248  |
| C | 2.6861910  | -1.2984403 | -1.1931655 |
| C | 1.6884451  | -0.3650075 | -1.3850886 |
| C | -2.6797467 | -2.5378507 | -0.5186986 |
| C | -1.4860253 | -0.1182258 | 1.5122869  |
| S | -0.0162195 | 2.8079344  | 0.4123496  |
| C | 0.7475130  | 4.2323213  | -0.4183160 |
| C | -1.7506564 | 3.2352918  | 0.1702720  |
| C | 4.4228922  | -2.3075097 | 0.2300584  |
| N | 5.2655064  | -3.0904231 | 0.3949140  |
| C | -2.7900975 | -2.3927026 | 1.0314727  |
| C | -1.6781742 | -1.6425317 | 1.8077945  |
| H | -3.4754639 | 0.6903361  | -0.3972693 |
| H | -0.8254464 | -0.8619786 | -0.3776589 |
| H | -0.1468187 | 1.5649118  | -1.6221456 |
| H | 1.8290106  | 1.1891440  | 1.6597777  |
| H | 3.5926052  | -0.4612029 | 1.9874420  |
| H | 2.9370912  | -1.9974069 | -1.9856259 |
| H | 1.1573875  | -0.3377491 | -2.3329328 |
| H | -3.2730841 | -3.3950247 | -0.8497606 |
| H | -1.6380884 | -2.7281790 | -0.8062508 |
| H | -2.3047243 | 0.4721490  | 1.9382587  |
| H | -0.5328885 | 0.2044650  | 1.9467144  |
| H | 0.5291249  | 5.1307963  | 0.1635914  |
| H | 1.8230842  | 4.0490231  | -0.4404304 |
| H | 0.3465271  | 4.3100263  | -1.4310192 |
| H | -1.8941059 | 4.2448479  | 0.5600863  |
| H | -2.3582916 | 2.5281015  | 0.7345291  |
| H | -1.9865410 | 3.1938838  | -0.8953843 |
| H | -3.7612913 | -1.9345852 | 1.2638402  |
| H | -2.8219387 | -3.4046108 | 1.4508533  |
| H | -0.7193820 | -2.1360685 | 1.6014470  |
| H | -1.8779763 | -1.7642779 | 2.8787112  |

3\_sy\_tr\_4\_ts2.log

E = -1188.174825  
H = -1187.811496  
G = -1187.884660

NImag=1

|   |            |            |            |
|---|------------|------------|------------|
| C | -1.7418764 | -0.4760090 | 0.9902126  |
| C | -1.4242710 | -0.0510361 | -0.3663394 |
| C | -3.0114705 | -0.9626392 | 1.3360597  |

|   |            |            |            |
|---|------------|------------|------------|
| O | -3.3553573 | -1.2905978 | 2.5044591  |
| C | -0.1371869 | 0.3712314  | -0.8055493 |
| C | 1.1808746  | -0.0845536 | -0.3880915 |
| C | 1.4023620  | -1.0730088 | 0.5896938  |
| C | 2.6943489  | -1.4697504 | 0.9034621  |
| C | 3.7803813  | -0.8643156 | 0.2584230  |
| C | 3.5811898  | 0.1158402  | -0.7229239 |
| C | 2.2864811  | 0.4867185  | -1.0481337 |
| C | -4.0282180 | -1.1577428 | 0.2092380  |
| C | -1.2314853 | -1.3240069 | -1.5045931 |
| S | -0.1444052 | 2.8088522  | 0.7013885  |
| C | 0.9121841  | 3.6871262  | -0.4794303 |
| C | -1.7587702 | 3.2307961  | 0.0017214  |
| C | 5.1201097  | -1.2595741 | 0.6032763  |
| N | 6.1987731  | -1.5774802 | 0.8797573  |
| C | -3.5908074 | -2.2108248 | -0.8236814 |
| C | -2.6493187 | -1.7208861 | -1.9232542 |
| H | -0.9826541 | -0.4220452 | 1.7635228  |
| H | -2.2049387 | 0.5313096  | -0.8644280 |
| H | -0.1288529 | 1.0102151  | -1.6877031 |
| H | 0.5688616  | -1.5452669 | 1.0945040  |
| H | 2.8659889  | -2.2376328 | 1.6500870  |
| H | 4.4308890  | 0.5675890  | -1.2233434 |
| H | 2.1188040  | 1.2325138  | -1.8199898 |
| H | -4.9622508 | -1.4725525 | 0.6824015  |
| H | -4.2254199 | -0.2056322 | -0.3044925 |
| H | -0.7099268 | -2.1113081 | -0.9584953 |
| H | -0.6740968 | -1.0746901 | -2.4114122 |
| H | 0.7191787  | 4.7619631  | -0.4352831 |
| H | 1.9520911  | 3.5007278  | -0.2021226 |
| H | 0.7385760  | 3.3233690  | -1.4963512 |
| H | -1.9137100 | 4.3123104  | 0.0256268  |
| H | -2.5240265 | 2.7442868  | 0.6110378  |
| H | -1.8352116 | 2.8713541  | -1.0290572 |
| H | -3.1362955 | -3.0640390 | -0.3020746 |
| H | -4.4852455 | -2.5953741 | -1.3270757 |
| H | -3.1097321 | -0.8794595 | -2.4554696 |
| H | -2.5176418 | -2.5240756 | -2.6600607 |

3\_sy\_tr\_5.log

E = -1188.210591

H = -1187.844220

G = -1187.913495

NImag=0

|   |           |            |             |
|---|-----------|------------|-------------|
| C | 4.1658275 | -2.4156851 | -6.2926997  |
| C | 3.3753429 | -3.5815778 | -6.8266319  |
| C | 5.3286760 | -2.4144499 | -5.5385969  |
| O | 6.0744770 | -1.3798168 | -5.4019608  |
| C | 3.6550586 | -3.7121631 | -8.3570055  |
| C | 2.9427803 | -4.8444564 | -9.0564125  |
| C | 3.3610281 | -6.1800733 | -8.9751501  |
| C | 2.6319155 | -7.1883166 | -9.5902965  |
| C | 1.4604260 | -6.8628392 | -10.2862106 |
| C | 1.0259489 | -5.5365151 | -10.3726093 |
| C | 1.7750099 | -4.5364527 | -9.7624130  |
| C | 5.8111002 | -3.6903083 | -4.8373844  |
| C | 3.5107190 | -4.9168147 | -6.0737631  |
| S | 5.5010791 | -3.7953191 | -8.6070730  |
| C | 5.6174333 | -4.2397257 | -10.3584749 |
| C | 6.0286759 | -2.0671253 | -8.7447616  |
| C | 0.7000080 | -7.9042902 | -10.9243814 |

|   |           |            |             |
|---|-----------|------------|-------------|
| N | 0.0884557 | -8.7428913 | -11.4382420 |
| C | 4.7947011 | -4.3717106 | -3.9111091  |
| C | 3.4389142 | -4.7233743 | -4.5567592  |
| H | 3.9190926 | -1.4604723 | -6.7612096  |
| H | 2.3018399 | -3.3292115 | -6.8079819  |
| H | 3.3803829 | -2.7682194 | -8.8403161  |
| H | 4.2652039 | -6.4478458 | -8.4342538  |
| H | 2.9614405 | -8.2202528 | -9.5319952  |
| H | 0.1198021 | -5.2939046 | -10.9176832 |
| H | 1.4480153 | -3.5030927 | -9.8337060  |
| H | 6.1656676 | -4.4098025 | -5.5874225  |
| H | 6.6892556 | -3.4048442 | -4.2499253  |
| H | 4.4445584 | -5.4304663 | -6.3364663  |
| H | 2.6997670 | -5.5773140 | -6.3973365  |
| H | 6.6569223 | -4.0784704 | -10.6501890 |
| H | 5.3632747 | -5.2916844 | -10.4795582 |
| H | 4.9490310 | -3.6031892 | -10.9426984 |
| H | 6.9723013 | -2.0858560 | -9.2953339  |
| H | 6.1709220 | -1.6667939 | -7.7387518  |
| H | 5.2722627 | -1.5091430 | -9.3006405  |
| H | 5.2571632 | -5.2903900 | -3.5288990  |
| H | 4.6225680 | -3.7297902 | -3.0383594  |
| H | 2.7046369 | -3.9371696 | -4.3453093  |
| H | 3.0524149 | -5.6363816 | -4.0907286  |

3\_sy\_tr\_5\_r.log

E = -1188.209506

H = -1187.843425

G = -1187.913445

NImag=0

|   |            |            |            |
|---|------------|------------|------------|
| C | 1.2796532  | -1.5022821 | -0.3111678 |
| C | 1.1556769  | -0.6366084 | 0.9269611  |
| C | 0.7008954  | -2.7386201 | -0.5580372 |
| O | 0.8834136  | -3.4340297 | -1.6163461 |
| C | 0.1147203  | 0.4693360  | 0.6327345  |
| C | 0.4226233  | 1.2929074  | -0.5952148 |
| C | 1.6597255  | 1.9336182  | -0.7392710 |
| C | 1.9238185  | 2.7094049  | -1.8605388 |
| C | 0.9417293  | 2.8417468  | -2.8504228 |
| C | -0.2971478 | 2.2045547  | -2.7206432 |
| C | -0.5496618 | 1.4379059  | -1.5887957 |
| C | -0.1939299 | -3.3564253 | 0.5219843  |
| C | 0.8528461  | -1.3452144 | 2.2703168  |
| S | -0.0069670 | 1.7093337  | 2.0623516  |
| C | -1.0037268 | 3.0410999  | 1.3543289  |
| C | -1.2477177 | 1.0056264  | 3.1745202  |
| C | 1.2097844  | 3.6441321  | -4.0144800 |
| N | 1.4243471  | 4.2911526  | -4.9507239 |
| C | 0.5930638  | -3.8271596 | 1.7546889  |
| C | 1.4828677  | -2.7364877 | 2.3778403  |
| H | 1.9306749  | -1.1071167 | -1.0907744 |
| H | 2.1221737  | -0.1297402 | 1.0636865  |
| H | -0.8924596 | 0.0414200  | 0.5648294  |
| H | 2.4275026  | 1.8315034  | 0.0232729  |
| H | 2.8803544  | 3.2084218  | -1.9744360 |
| H | -1.0492491 | 2.3131811  | -3.4950397 |
| H | -1.5100921 | 0.9431644  | -1.4762721 |
| H | -0.9635303 | -2.6406120 | 0.8365829  |
| H | -0.7130319 | -4.2084238 | 0.0724517  |
| H | -0.2296397 | -1.4374792 | 2.4218052  |
| H | 1.2277591  | -0.7122531 | 3.0854086  |

|   |            |            |           |
|---|------------|------------|-----------|
| H | -1.2773316 | 3.6971585  | 2.1830300 |
| H | -0.3927825 | 3.5873604  | 0.6356376 |
| H | -1.8942615 | 2.6214057  | 0.8814560 |
| H | -1.6218540 | 1.8360424  | 3.7769974 |
| H | -0.7691901 | 0.2703702  | 3.8181987 |
| H | -2.0538995 | 0.5609455  | 2.5877824 |
| H | -0.1231730 | -4.1778457 | 2.5089542 |
| H | 1.2108783  | -4.6926494 | 1.4847449 |
| H | 2.4630054  | -2.7202589 | 1.8889030 |
| H | 1.6620986  | -2.9804417 | 3.4308082 |

3\_sy\_tr\_5\_ts2.log

E = -1188.204024

H = -1187.839260

G = -1187.909002

NImag=1

|   |            |            |            |
|---|------------|------------|------------|
| C | 1.3355360  | -1.5678877 | -0.4827076 |
| C | 1.3764428  | -0.1245680 | -0.9399962 |
| C | 2.1911091  | -2.1892591 | 0.4386762  |
| O | 2.1100953  | -3.4110813 | 0.7603227  |
| C | 0.3856906  | 0.3804535  | 0.0593368  |
| C | -1.0370688 | -0.0628573 | -0.0118095 |
| C | -1.7140961 | -0.1365731 | -1.2374866 |
| C | -3.0557215 | -0.4909119 | -1.2801740 |
| C | -3.7310493 | -0.7749226 | -0.0858644 |
| C | -3.0693727 | -0.7018828 | 1.1461167  |
| C | -1.7289340 | -0.3407631 | 1.1740789  |
| C | 3.3209698  | -1.3664440 | 1.0565892  |
| C | 2.7285268  | 0.6210879  | -0.9315591 |
| S | 0.1243628  | 2.5392415  | -0.2464558 |
| C | -1.2963042 | 2.8926967  | 0.8137841  |
| C | 1.4263710  | 3.2564427  | 0.7845036  |
| C | -5.1204428 | -1.1439161 | -0.1258026 |
| N | -6.2397661 | -1.4402957 | -0.1577223 |
| C | 4.4246616  | -1.0067584 | 0.0475573  |
| C | 3.9155854  | -0.3004962 | -1.2227036 |
| H | 0.5568930  | -2.1856623 | -0.9240069 |
| H | 0.9628623  | -0.0641861 | -1.9524384 |
| H | 0.7771325  | 0.4431727  | 1.0776891  |
| H | -1.1965430 | 0.0871607  | -2.1656030 |
| H | -3.5817474 | -0.5471862 | -2.2274019 |
| H | -3.6026060 | -0.9252922 | 2.0642163  |
| H | -1.2063041 | -0.2796345 | 2.1245780  |
| H | 2.9205464  | -0.4456914 | 1.4986351  |
| H | 3.7493861  | -1.9557878 | 1.8725307  |
| H | 2.8904500  | 1.1060192  | 0.0377013  |
| H | 2.6803671  | 1.4244729  | -1.6762707 |
| H | -1.3909468 | 3.9772501  | 0.9001099  |
| H | -2.1897981 | 2.4843189  | 0.3391388  |
| H | -1.1483253 | 2.4451997  | 1.7997039  |
| H | 1.1147431  | 4.2648130  | 1.0653558  |
| H | 2.3423575  | 3.3109336  | 0.1968756  |
| H | 1.5785180  | 2.6463430  | 1.6784210  |
| H | 5.1448859  | -0.3521166 | 0.5540669  |
| H | 4.9708505  | -1.9155950 | -0.2326181 |
| H | 3.6153639  | -1.0399567 | -1.9737998 |
| H | 4.7367485  | 0.2756638  | -1.6622695 |

3\_sy\_tr\_6.log

E = -1188.212937

```

H =      -1187.847121
G =      -1187.917412
NImag=0
C      5.0377034      -4.1532961      -6.5311761
C      4.1310785      -3.1584500      -7.2217499
C      5.0266973      -4.5756186      -5.2083037
O      5.7922482      -5.4917285      -4.7464124
C      3.9842234      -3.4497706      -8.7391153
C      3.1794877      -4.6716756      -9.1144765
C      3.6214819      -5.9745494      -8.8469845
C      2.8281352      -7.0682050      -9.1748329
C      1.5823896      -6.8595574      -9.7772126
C      1.1328606      -5.5653496     -10.0621273
C      1.9384425      -4.4817624      -9.7338341
C      4.0852969      -3.9356763      -4.1723494
C      2.7030696      -3.0822128      -6.6438521
S      5.6446145      -3.6024747      -9.5374596
C      5.2113218      -3.3301156     -11.2658866
C      6.4188369      -2.0298185      -9.1235983
C      0.7573926      -7.9888213     -10.1160267
N      0.0921912      -8.8967635     -10.3886992
C      3.7524580      -2.4573166      -4.3886591
C      2.6139902      -2.2188777      -5.3823262
H      5.7918177      -4.6483841      -7.1440725
H      4.5256038      -2.1261660      -7.1908455
H      3.5412449      -2.5695087      -9.2188252
H      4.5855698      -6.1443207      -8.3801550
H      3.1690543      -8.0767869      -8.9661339
H      0.1695054      -5.4148823     -10.5379326
H      1.5981421      -3.4746372      -9.9568833
H      3.1589326      -4.5262949      -4.1077008
H      4.5948106      -4.0646305      -3.2117480
H      2.3613342      -4.1034321      -6.4340185
H      2.0157060      -2.6678895      -7.3932598
H      6.1456381      -3.2673096     -11.8265017
H      4.6345781      -4.1932911     -11.6034359
H      4.6342877      -2.4080776     -11.3593470
H      7.2988718      -1.9359944      -9.7628244
H      6.7230561      -2.0736221      -8.0766283
H      5.7170241      -1.2132921      -9.3048255
H      3.4849889      -1.9929606      -3.4320517
H      4.6579613      -1.9430193      -4.7370451
H      2.6029792      -1.1596923      -5.6687312
H      1.6530733      -2.4218678      -4.8927513

```

```

3_sy_tr_7.log
E =      -1188.212463
H =      -1187.846522
G =      -1187.915778
NImag=0
C      5.1478745      -3.3923951      -6.4346333
C      4.1496834      -2.6272671      -7.2650972
C      5.0437071      -4.5018112      -5.6011427
O      6.0670889      -5.1282779      -5.1546335
C      4.0182324      -3.1286751      -8.7467446
C      3.2830158      -4.4218876      -8.9748522
C      2.0362443      -4.3787331      -9.6100085
C      1.2902540      -5.5369885      -9.7859225
C      1.8082151      -6.7567925      -9.3331588
C      3.0661031      -6.8193810      -8.7220607
C      3.8005843      -5.6520305      -8.5490168

```

|   |           |            |             |
|---|-----------|------------|-------------|
| C | 3.7027213 | -5.0813212 | -5.1323361  |
| C | 2.7402667 | -2.3545984 | -6.7031883  |
| S | 5.7068556 | -3.3392865 | -9.4611759  |
| C | 5.3193112 | -3.4107305 | -11.2217145 |
| C | 6.3943513 | -1.6776136 | -9.3418031  |
| C | 1.0432250 | -7.9624982 | -9.5104711  |
| N | 0.4260028 | -8.9320758 | -9.6530048  |
| C | 2.5308552 | -4.1378222 | -4.8729149  |
| C | 1.9229057 | -3.5103686 | -6.1241873  |
| H | 6.1866428 | -3.1273768 | -6.6503592  |
| H | 4.5654316 | -1.6187509 | -7.3983374  |
| H | 3.5600464 | -2.3381535 | -9.3534959  |
| H | 1.6423073 | -3.4274536 | -9.9567261  |
| H | 0.3202845 | -5.5032946 | -10.2706819 |
| H | 3.4593907 | -7.7728722 | -8.3850364  |
| H | 4.7715324 | -5.6991609 | -8.0646126  |
| H | 3.3870698 | -5.8474833 | -5.8566274  |
| H | 3.9385613 | -5.6200329 | -4.2082176  |
| H | 2.1526856 | -1.8624122 | -7.4908248  |
| H | 2.8643421 | -1.6115502 | -5.9044696  |
| H | 6.2680386 | -3.4046419 | -11.7612982 |
| H | 4.7962090 | -4.3503823 | -11.4076776 |
| H | 4.7027692 | -2.5546771 | -11.5023344 |
| H | 7.2674478 | -1.6524043 | -9.9968163  |
| H | 6.7027523 | -1.5083039 | -8.3097223  |
| H | 5.6469713 | -0.9481475 | -9.6610976  |
| H | 1.7491651 | -4.7115942 | -4.3594106  |
| H | 2.8391926 | -3.3429419 | -4.1786398  |
| H | 0.9340850 | -3.1057644 | -5.8736636  |
| H | 1.7511770 | -4.2956467 | -6.8707832  |

3\_sy\_tr\_8.log

E = -1188.212677

H = -1187.846858

G = -1187.916733

NImag=0

|   |           |            |             |
|---|-----------|------------|-------------|
| C | 5.1718952 | -3.7216369 | -6.5217311  |
| C | 4.2516419 | -2.8114214 | -7.2947336  |
| C | 4.8386631 | -4.7097626 | -5.6077124  |
| O | 5.6795830 | -5.4344243 | -4.9711449  |
| C | 4.0477033 | -3.2213110 | -8.7929354  |
| C | 3.2875785 | -4.5045789 | -9.0139654  |
| C | 1.9600392 | -4.4265485 | -9.4515524  |
| C | 1.1929799 | -5.5745837 | -9.6056722  |
| C | 1.7684704 | -6.8210612 | -9.3312358  |
| C | 3.1006566 | -6.9183655 | -8.9135104  |
| C | 3.8545316 | -5.7608517 | -8.7569945  |
| C | 3.3563299 | -4.9422439 | -5.2884663  |
| C | 2.8492124 | -2.5041907 | -6.7065134  |
| S | 5.6938310 | -3.4107506 | -9.5999732  |
| C | 5.2263651 | -3.3432447 | -11.3410333 |
| C | 6.4312417 | -1.7797597 | -9.3900783  |
| C | 0.9840155 | -8.0166528 | -9.4907917  |
| N | 0.3518071 | -8.9785715 | -9.6190881  |
| C | 2.7123603 | -3.7881052 | -4.5043388  |
| C | 2.8567820 | -2.4106824 | -5.1787683  |
| H | 6.2400412 | -3.5506849 | -6.6745730  |
| H | 4.7418553 | -1.8288643 | -7.3535017  |
| H | 3.5598910 | -2.4042498 | -9.3394425  |
| H | 1.5219580 | -3.4553448 | -9.6642841  |
| H | 0.1624183 | -5.5110694 | -9.9388706  |



|   |           |            |             |
|---|-----------|------------|-------------|
| H | 3.5377892 | -7.8907403 | -8.7120032  |
| H | 4.8839862 | -5.8418261 | -8.4238130  |
| H | 2.7879306 | -5.1105917 | -6.2118328  |
| H | 3.2903473 | -5.8626156 | -4.6996456  |
| H | 2.1162928 | -3.2592894 | -7.0121956  |
| H | 2.5094035 | -1.5574731 | -7.1428876  |
| H | 6.1484749 | -3.3394959 | -11.9250230 |
| H | 4.6511926 | -4.2437609 | -11.5643534 |
| H | 4.6384529 | -2.4430750 | -11.5299441 |
| H | 7.2594096 | -1.7181878 | -10.0992487 |
| H | 6.8130271 | -1.7058994 | -8.3714974  |
| H | 5.6852611 | -1.0093201 | -9.5958543  |
| H | 1.6453574 | -4.0134455 | -4.3793384  |
| H | 3.1417092 | -3.7477372 | -3.4953785  |
| H | 3.7854157 | -1.9255765 | -4.8573617  |
| H | 2.0371983 | -1.7637049 | -4.8461111  |

3\_sy\_tr\_9.log

E = -1188.210529

H = -1187.844345

G = -1187.912761

NImag=0

|   |           |            |             |
|---|-----------|------------|-------------|
| C | 4.0086743 | -2.2787946 | -6.2686540  |
| C | 3.1703519 | -3.4110741 | -6.8070046  |
| C | 5.2167943 | -2.2569934 | -5.5827608  |
| O | 5.9484289 | -1.2025682 | -5.5376891  |
| C | 3.5927814 | -3.6930121 | -8.2920294  |
| C | 2.8817065 | -4.8255818 | -8.9899322  |
| C | 3.1842432 | -6.1749310 | -8.7608633  |
| C | 2.4658620 | -7.1795685 | -9.3935881  |
| C | 1.4192587 | -6.8346645 | -10.2588274 |
| C | 1.0990857 | -5.4941218 | -10.4942062 |
| C | 1.8385271 | -4.4994659 | -9.8631385  |
| C | 5.8392782 | -3.4652465 | -4.8753044  |
| C | 2.9637649 | -4.6490772 | -5.9269891  |
| S | 5.4493397 | -3.8555104 | -8.4088377  |
| C | 5.6699862 | -4.5066606 | -10.0833822 |
| C | 6.0179155 | -2.1625997 | -8.7152682  |
| C | 0.6704085 | -7.8721799 | -10.9167596 |
| N | 0.0685585 | -8.7076826 | -11.4468359 |
| C | 4.9568443 | -4.5837927 | -4.3305196  |
| C | 4.1940050 | -5.3786825 | -5.3877414  |
| H | 3.7818626 | -1.3232689 | -6.7481125  |
| H | 2.1544423 | -3.0180178 | -6.9635929  |
| H | 3.4067823 | -2.7717710 | -8.8544248  |
| H | 3.9897355 | -6.4565504 | -8.0875306  |
| H | 2.7072101 | -8.2229285 | -9.2200287  |
| H | 0.2896108 | -5.2369708 | -11.1691550 |
| H | 1.6020963 | -3.4558729 | -10.0506345 |
| H | 6.5796480 | -3.8994592 | -5.5659314  |
| H | 6.4226256 | -3.0387628 | -4.0516762  |
| H | 2.3242767 | -5.3585910 | -6.4637974  |
| H | 2.3768718 | -4.3123386 | -5.0624948  |
| H | 6.7292567 | -4.3888550 | -10.3193895 |
| H | 5.4081279 | -5.5638586 | -10.0937283 |
| H | 5.0535444 | -3.9406090 | -10.7852557 |
| H | 7.0080619 | -2.2551932 | -9.1678432  |
| H | 6.0767597 | -1.6364549 | -7.7589121  |
| H | 5.3265653 | -1.6765634 | -9.4075599  |
| H | 5.6032185 | -5.2716926 | -3.7716830  |
| H | 4.2402608 | -4.1727955 | -3.6055794  |

|   |           |            |            |
|---|-----------|------------|------------|
| H | 3.8505808 | -6.3221378 | -4.9461371 |
| H | 4.8853471 | -5.6561003 | -6.1957015 |

3\_sy\_tr\_prod\_1.log

E = -710.333932  
H = -710.051622  
G = -710.108814

NImag=0

|   |            |            |            |
|---|------------|------------|------------|
| C | 1.4046719  | -0.8419815 | 0.0347981  |
| C | 1.3090618  | 0.5962713  | 0.4582470  |
| C | 0.2106107  | -0.3845925 | 0.8257267  |
| C | -1.1348960 | -0.2981295 | 0.2023706  |
| C | -1.3075860 | 0.0341555  | -1.1504517 |
| C | -2.5760389 | 0.1191692  | -1.7069852 |
| C | -3.6997481 | -0.1314459 | -0.9078089 |
| C | -3.5478014 | -0.4661878 | 0.4430836  |
| C | -2.2712777 | -0.5462578 | 0.9851701  |
| H | 0.2021269  | -0.6980826 | 1.8671288  |
| H | 1.2814676  | -1.0514188 | -1.0262268 |
| H | 1.0650420  | 1.2991514  | -0.3362021 |
| C | 2.2630012  | 1.1254891  | 1.5122294  |
| C | 3.7194459  | 1.1742882  | 1.0199362  |
| C | 4.4623295  | -0.1638060 | 1.1021481  |
| C | 3.8873261  | -1.3101359 | 0.2409525  |
| C | 2.4870130  | -1.6434905 | 0.6981924  |
| O | 2.2703524  | -2.4350854 | 1.5979507  |
| C | -5.0150440 | -0.0448391 | -1.4794806 |
| N | -6.0759137 | 0.0252932  | -1.9405387 |
| H | -0.4453566 | 0.2285170  | -1.7822207 |
| H | -2.7022760 | 0.3765280  | -2.7536603 |
| H | -4.4218288 | -0.6599664 | 1.0565344  |
| H | -2.1502798 | -0.8056486 | 2.0329789  |
| H | 2.2066591  | 0.5008273  | 2.4143218  |
| H | 1.9349839  | 2.1278673  | 1.8068359  |
| H | 3.7416319  | 1.5479606  | -0.0128192 |
| H | 4.2746339  | 1.8981273  | 1.6267663  |
| H | 4.4881063  | -0.4947590 | 2.1483426  |
| H | 5.5014255  | -0.0120793 | 0.7920684  |
| H | 4.5165733  | -2.1976800 | 0.3520198  |
| H | 3.8727842  | -1.0066588 | -0.8116082 |

3\_sy\_tr\_prod\_3.log

E = -710.328888  
H = -710.046475  
G = -710.104027

NImag=0

|   |            |            |            |
|---|------------|------------|------------|
| C | 1.2437419  | -1.1280963 | 0.6394769  |
| C | 1.5440030  | -0.1360600 | -0.4363922 |
| C | 0.3923522  | 0.1126311  | 0.5261861  |
| C | -1.0183271 | 0.0374073  | 0.0688806  |
| C | -1.9515401 | 0.9539738  | 0.5746101  |
| C | -3.2794298 | 0.9261715  | 0.1681808  |
| C | -3.6917451 | -0.0345134 | -0.7629338 |
| C | -2.7746078 | -0.9596370 | -1.2800667 |
| C | -1.4515109 | -0.9190160 | -0.8632905 |
| H | 0.5649844  | 0.8704326  | 1.2864113  |
| H | 0.7768437  | -2.0647847 | 0.3342819  |
| H | 1.2270770  | -0.4353495 | -1.4337092 |
| C | 2.7767612  | 0.7600744  | -0.4401115 |
| C | 3.3798671  | 1.0965713  | 0.9287693  |

|   |            |            |            |
|---|------------|------------|------------|
| C | 4.2614894  | -0.0048975 | 1.5321439  |
| C | 3.6379418  | -1.4176005 | 1.4899553  |
| C | 2.1677314  | -1.3330710 | 1.8168155  |
| O | 1.7408403  | -1.4259388 | 2.9528285  |
| C | -5.0628550 | -0.0741006 | -1.1900286 |
| N | -6.1688660 | -0.1057833 | -1.5346544 |
| H | -1.6290639 | 1.6977668  | 1.2976544  |
| H | -3.9939936 | 1.6396288  | 0.5657931  |
| H | -3.1027673 | -1.7019027 | -2.0006103 |
| H | -0.7537456 | -1.6450068 | -1.2717349 |
| H | 2.5038815  | 1.6904567  | -0.9513588 |
| H | 3.5462321  | 0.2815775  | -1.0604953 |
| H | 3.9884550  | 2.0010018  | 0.8281348  |
| H | 2.5832314  | 1.3582320  | 1.6374183  |
| H | 4.4784464  | 0.2520185  | 2.5743757  |
| H | 5.2196259  | -0.0421820 | 1.0030275  |
| H | 4.1362432  | -2.0701783 | 2.2114120  |
| H | 3.7502036  | -1.8424256 | 0.4873301  |

3\_sy\_tr\_prod\_4.log

E = -710.335303

H = -710.052464

G = -710.109819

NImag=0

|   |            |            |            |
|---|------------|------------|------------|
| C | 1.4848300  | -0.8975165 | -0.2878901 |
| C | 1.5089684  | 0.6162413  | -0.3059230 |
| C | 0.4466573  | -0.0853529 | 0.4832691  |
| C | -0.9752488 | -0.1022446 | 0.0496590  |
| C | -1.9842862 | -0.0797456 | 1.0226464  |
| C | -3.3264758 | -0.0862756 | 0.6646441  |
| C | -3.6743369 | -0.1177373 | -0.6908928 |
| C | -2.6798710 | -0.1424499 | -1.6780166 |
| C | -1.3432778 | -0.1342291 | -1.3041623 |
| H | 0.5734863  | -0.0795329 | 1.5616189  |
| H | 1.1345675  | -1.3629994 | -1.2051834 |
| H | 1.1656314  | 1.0091101  | -1.2610110 |
| C | 2.5832942  | 1.4854760  | 0.3216826  |
| C | 3.0298636  | 1.1686162  | 1.7497140  |
| C | 3.8020711  | -0.1396174 | 1.9190130  |
| C | 2.9583812  | -1.4199516 | 1.8093909  |
| C | 2.5088815  | -1.7327985 | 0.3993966  |
| O | 2.9868502  | -2.6846018 | -0.2027652 |
| C | -5.0595905 | -0.1246472 | -1.0729564 |
| N | -6.1766407 | -0.1296816 | -1.3811257 |
| H | -1.7114320 | -0.0557148 | 2.0737010  |
| H | -4.1010731 | -0.0676503 | 1.4244520  |
| H | -2.9579314 | -0.1675463 | -2.7266412 |
| H | -0.5847535 | -0.1543542 | -2.0814858 |
| H | 2.2058822  | 2.5145558  | 0.2999435  |
| H | 3.4622733  | 1.4647435  | -0.3363710 |
| H | 3.6796538  | 1.9900781  | 2.0711637  |
| H | 2.1681897  | 1.1772843  | 2.4298571  |
| H | 4.2632830  | -0.1459112 | 2.9119750  |
| H | 4.6229023  | -0.1799199 | 1.1906708  |
| H | 2.0858320  | -1.3371735 | 2.4679472  |
| H | 3.5493185  | -2.2783532 | 2.1383795  |

3\_sy\_tr\_prod\_5.log

E = -710.331802

H = -710.050025

G = -710.107888  
 NImag=0

|   |            |            |            |
|---|------------|------------|------------|
| C | 1.4218967  | -0.8627150 | 0.1004058  |
| C | 1.3459941  | 0.5613018  | 0.5530187  |
| C | 0.2273176  | -0.4050804 | 0.8994711  |
| C | -1.1104844 | -0.2857306 | 0.2668823  |
| C | -1.2680364 | 0.1062735  | -1.0718406 |
| C | -2.5301641 | 0.2171572  | -1.6380537 |
| C | -3.6628830 | -0.0673090 | -0.8631795 |
| C | -3.5260607 | -0.4605251 | 0.4734200  |
| C | -2.2558001 | -0.5657777 | 1.0255613  |
| H | 0.2022857  | -0.7403526 | 1.9339433  |
| H | 1.2791105  | -1.0761894 | -0.9583528 |
| H | 1.1180204  | 1.3019684  | -0.2118528 |
| C | 2.3291076  | 0.9868084  | 1.6232008  |
| C | 3.7447451  | 1.1793690  | 1.0550323  |
| C | 4.1770040  | 0.0649577  | 0.0911462  |
| C | 3.9152160  | -1.3519659 | 0.6061329  |
| C | 2.4535638  | -1.7397184 | 0.7693342  |
| O | 2.1373132  | -2.7264237 | 1.4077577  |
| C | -4.9717550 | 0.0448988  | -1.4449436 |
| N | -6.0273556 | 0.1357529  | -1.9144462 |
| H | -0.3984369 | 0.3280657  | -1.6842167 |
| H | -2.6448591 | 0.5204467  | -2.6737203 |
| H | -4.4070190 | -0.6799549 | 1.0679615  |
| H | -2.1465036 | -0.8705543 | 2.0623779  |
| H | 2.3519768  | 0.2157844  | 2.4059084  |
| H | 1.9911165  | 1.9070643  | 2.1112245  |
| H | 3.8002593  | 2.1376986  | 0.5253303  |
| H | 4.4520261  | 1.2395921  | 1.8909568  |
| H | 5.2481069  | 0.1668049  | -0.1119764 |
| H | 3.6691174  | 0.1926035  | -0.8714906 |
| H | 4.4016038  | -1.5255389 | 1.5737513  |
| H | 4.3439763  | -2.0846119 | -0.0906439 |

3\_sy\_tr\_prod\_6.log  
 E = -710.325079  
 H = -710.043126  
 G = -710.102268  
 NImag=0

|   |            |            |            |
|---|------------|------------|------------|
| C | 1.4985200  | -0.7473370 | -0.0952595 |
| C | 1.3943332  | 0.7171928  | 0.2240294  |
| C | 0.3281112  | -0.2482017 | 0.7093146  |
| C | -1.0509762 | -0.2209771 | 0.1621252  |
| C | -1.3076757 | 0.0115727  | -1.1985163 |
| C | -2.6074413 | 0.0415790  | -1.6839152 |
| C | -3.6794094 | -0.1637430 | -0.8043479 |
| C | -3.4437646 | -0.3981927 | 0.5556634  |
| C | -2.1370432 | -0.4249326 | 1.0257905  |
| H | 0.3815348  | -0.4864660 | 1.7701545  |
| H | 1.3054182  | -1.0280109 | -1.1313202 |
| H | 1.0744188  | 1.3178862  | -0.6247011 |
| C | 2.2964695  | 1.4619902  | 1.2019297  |
| C | 3.4505870  | 0.6527028  | 1.8040937  |
| C | 4.3291558  | 0.0077159  | 0.7180766  |
| C | 3.9424598  | -1.4502220 | 0.4126685  |
| C | 2.4626101  | -1.7069712 | 0.5643303  |
| O | 2.0429903  | -2.6775600 | 1.1678686  |
| C | -5.0270232 | -0.1340018 | -1.3013240 |
| N | -6.1140514 | -0.1096796 | -1.7024228 |
| H | -0.4876972 | 0.1721179  | -1.8932100 |

|   |            |            |            |
|---|------------|------------|------------|
| H | -2.7980475 | 0.2218739  | -2.7370088 |
| H | -4.2774384 | -0.5576459 | 1.2318916  |
| H | -1.9518568 | -0.6076029 | 2.0804405  |
| H | 1.6851835  | 1.8981468  | 2.0009079  |
| H | 2.7401545  | 2.3027444  | 0.6564516  |
| H | 4.0482773  | 1.3342107  | 2.4177898  |
| H | 3.0717152  | -0.1162295 | 2.4927060  |
| H | 5.3794830  | 0.0163059  | 1.0228989  |
| H | 4.2646397  | 0.6122208  | -0.1940764 |
| H | 4.4553829  | -2.1431711 | 1.0857766  |
| H | 4.2228800  | -1.7146149 | -0.6153056 |

### 3\_sy\_tr\_prod\_7.log

E = -710.333263  
H = -710.050452  
G = -710.107837

NImag=0

|   |            |            |            |
|---|------------|------------|------------|
| C | 1.4517946  | -0.7103400 | -0.1822817 |
| C | 1.3721566  | 0.7734316  | 0.1233793  |
| C | 0.3179660  | -0.1384169 | 0.6686756  |
| C | -1.0725852 | -0.1538622 | 0.1436540  |
| C | -1.3659403 | 0.0831810  | -1.2079734 |
| C | -2.6768119 | 0.0697198  | -1.6638767 |
| C | -3.7201121 | -0.1824863 | -0.7630190 |
| C | -3.4468739 | -0.4211135 | 0.5890989  |
| C | -2.1295455 | -0.4056170 | 1.0296799  |
| H | 0.3854543  | -0.3419267 | 1.7339201  |
| H | 1.1735317  | -1.0100206 | -1.1889930 |
| H | 1.0671393  | 1.3495611  | -0.7473523 |
| C | 2.3793440  | 1.4903443  | 1.0197012  |
| C | 3.8252309  | 1.0195112  | 0.8050851  |
| C | 4.1934983  | -0.2106638 | 1.6471076  |
| C | 3.0688506  | -1.2600481 | 1.7637031  |
| C | 2.4974215  | -1.5915161 | 0.4064079  |
| O | 2.9169532  | -2.5428331 | -0.2381979 |
| C | -5.0786127 | -0.1952186 | -1.2314941 |
| N | -6.1739892 | -0.2050618 | -1.6093546 |
| H | -0.5696408 | 0.2806059  | -1.9200145 |
| H | -2.8973727 | 0.2531585  | -2.7104122 |
| H | -4.2590167 | -0.6155381 | 1.2820514  |
| H | -1.9140700 | -0.5904417 | 2.0781267  |
| H | 2.1032065  | 1.3771739  | 2.0749422  |
| H | 2.3052165  | 2.5581152  | 0.7949668  |
| H | 3.9667603  | 0.7997287  | -0.2608697 |
| H | 4.5211161  | 1.8283385  | 1.0498490  |
| H | 4.4478859  | 0.1071176  | 2.6640751  |
| H | 5.0853127  | -0.6879236 | 1.2269500  |
| H | 2.2849650  | -0.8815781 | 2.4251059  |
| H | 3.4640667  | -2.1810813 | 2.1989591  |

### 4a.log

E = -305.169163  
H = -305.087982  
G = -305.121481

NImag=0

|   |            |            |            |
|---|------------|------------|------------|
| C | -0.1667507 | -1.2305037 | -0.3858679 |
| C | 1.2471598  | -0.8945914 | -0.0389624 |
| O | 1.2359204  | 0.5183600  | 0.1970488  |
| C | -0.0194490 | 1.0036270  | 0.0211946  |
| C | -0.9048190 | -0.1195461 | -0.3499969 |

|   |            |            |            |
|---|------------|------------|------------|
| O | -0.2756891 | 2.1770529  | 0.1665119  |
| H | -0.4896581 | -2.2375679 | -0.6220131 |
| H | 1.5893856  | -1.4034301 | 0.8674423  |
| H | 1.9429552  | -1.1129223 | -0.8549313 |
| H | -1.9607571 | 0.0087202  | -0.5451260 |

4a\_c\_sy\_1.log

E = -1145.534118

H = -1145.252442

G = -1145.316808

NImag=0

|   |            |            |            |
|---|------------|------------|------------|
| C | 2.5337255  | 1.2186910  | -0.6212743 |
| C | 2.0048792  | -0.1080715 | -0.1704309 |
| C | 3.6061391  | 1.6156731  | 0.1603315  |
| O | 4.2703761  | 2.6656259  | 0.2450871  |
| C | 0.6133786  | -0.1806761 | 0.5144383  |
| C | -0.5773556 | -0.2192445 | -0.4265656 |
| C | -1.7575712 | -0.8445366 | -0.0023671 |
| C | -2.8682185 | -0.9067158 | -0.8327237 |
| C | -2.7972751 | -0.3351967 | -2.1090206 |
| C | -1.6260431 | 0.2891002  | -2.5493222 |
| C | -0.5214548 | 0.3442671  | -1.7054206 |
| O | 3.9583639  | 0.5691196  | 1.0522145  |
| C | 3.1726169  | -0.5753419 | 0.7320671  |
| S | 0.1704405  | 1.1042472  | 1.7800992  |
| C | 1.5421861  | 1.1741830  | 2.9440362  |
| C | 0.2464262  | 2.7287269  | 0.9958478  |
| C | -3.9411827 | -0.3970977 | -2.9801998 |
| N | -4.8618671 | -0.4467864 | -3.6808005 |
| H | 2.0422903  | 1.8975281  | -1.3047573 |
| H | 1.8853780  | -0.8492235 | -0.9751626 |
| H | 0.5738392  | -1.0840375 | 1.1381898  |
| H | -1.8058861 | -1.2952983 | 0.9855508  |
| H | -3.7784528 | -1.3967374 | -0.5039470 |
| H | -1.5814767 | 0.7242095  | -3.5421575 |
| H | 0.3852686  | 0.8224557  | -2.0582386 |
| H | 3.7978030  | -1.2870948 | 0.1808613  |
| H | 2.8415368  | -1.0499237 | 1.6619952  |
| H | 1.2820026  | 1.9532672  | 3.6641241  |
| H | 1.5908699  | 0.2084911  | 3.4508152  |
| H | 2.4780303  | 1.4046388  | 2.4340808  |
| H | -0.2432364 | 3.4133573  | 1.6920242  |
| H | -0.3243311 | 2.6813180  | 0.0661821  |
| H | 1.2815003  | 3.0080825  | 0.8084434  |

4a\_c\_sy\_1\_r.log

E = -1145.533225

H = -1145.251274

G = -1145.315769

NImag=0

|   |            |            |            |
|---|------------|------------|------------|
| C | -0.5640536 | -2.1152317 | -0.5819706 |
| C | -1.1990515 | -0.8806425 | -1.1500312 |
| C | -1.3029686 | -2.5941170 | 0.4915638  |
| O | -1.1289630 | -3.4969961 | 1.3285829  |
| C | -0.3262563 | 0.3628338  | -0.8370096 |
| C | 0.1203329  | 0.6521578  | 0.5791193  |
| C | 1.3979667  | 1.1929443  | 0.7681595  |
| C | 1.8521715  | 1.5292139  | 2.0381685  |
| C | 1.0140685  | 1.3160011  | 3.1368271  |
| C | -0.2651950 | 0.7722336  | 2.9660500  |

|   |            |            |            |
|---|------------|------------|------------|
| C | -0.7082838 | 0.4481867  | 1.6898988  |
| O | -2.5092375 | -1.8536256 | 0.5985695  |
| C | -2.6098556 | -0.9967542 | -0.5338459 |
| S | -0.9644000 | 2.0051331  | -1.5182893 |
| C | -2.1521361 | 1.5656442  | -2.8038920 |
| C | -2.0430547 | 2.7051981  | -0.2530666 |
| C | 1.4718539  | 1.6570176  | 4.4577190  |
| N | 1.8401815  | 1.9333862  | 5.5203101  |
| H | 0.4353287  | -2.4570096 | -0.8182702 |
| H | -1.2904118 | -0.8918337 | -2.2416378 |
| H | 0.5747676  | 0.2534222  | -1.4509841 |
| H | 2.0490879  | 1.3482541  | -0.0882676 |
| H | 2.8435894  | 1.9464156  | 2.1791690  |
| H | -0.9040223 | 0.6072627  | 3.8273749  |
| H | -1.6980836 | 0.0211331  | 1.5731086  |
| H | -3.2780873 | -1.4579857 | -1.2720202 |
| H | -3.0565778 | -0.0514101 | -0.2130672 |
| H | -2.5452713 | 2.5098236  | -3.1865845 |
| H | -1.6123294 | 1.0447811  | -3.5962501 |
| H | -2.9563948 | 0.9508914  | -2.3983863 |
| H | -2.5525508 | 3.5453501  | -0.7303541 |
| H | -1.4117352 | 3.0720139  | 0.5570070  |
| H | -2.7652068 | 1.9734952  | 0.1079556  |

4a\_c\_sy\_1\_ts1.log

E = -1145.510166

H = -1145.231096

G = -1145.295518

NImag=1

|   |            |            |            |
|---|------------|------------|------------|
| C | -1.0860362 | -1.8891691 | -0.1330989 |
| C | -1.0927146 | -0.9564439 | -1.1615878 |
| C | -2.4328380 | -2.1309050 | 0.2894949  |
| O | -2.8941186 | -2.8032883 | 1.2019993  |
| C | -0.4073835 | 1.0000063  | -0.6211789 |
| C | 0.9805493  | 0.6961063  | -0.3461410 |
| C | 1.8999813  | 0.6129062  | -1.4185559 |
| C | 3.2037633  | 0.1969291  | -1.2177449 |
| C | 3.6355496  | -0.1532740 | 0.0734939  |
| C | 2.7383032  | -0.0919951 | 1.1502964  |
| C | 1.4305331  | 0.3152983  | 0.9391137  |
| O | -3.2979069 | -1.4469100 | -0.5456323 |
| C | -2.5382629 | -0.8123514 | -1.5789017 |
| S | -1.2162362 | 1.8846159  | 0.6812478  |
| C | -2.2686880 | 3.0365964  | -0.2211629 |
| C | -2.4882574 | 0.8378358  | 1.4373242  |
| C | 4.9864112  | -0.5768294 | 0.2883034  |
| N | 6.0813900  | -0.9197895 | 0.4612785  |
| H | -0.2297970 | -2.3527871 | 0.3369653  |
| H | -0.3243191 | -0.8955772 | -1.9262066 |
| H | -0.6214646 | 1.4855009  | -1.5718959 |
| H | 1.5748183  | 0.8933936  | -2.4168595 |
| H | 3.8981548  | 0.1481869  | -2.0509413 |
| H | 3.0682351  | -0.3746092 | 2.1451933  |
| H | 0.7495885  | 0.3324481  | 1.7873199  |
| H | -2.7095269 | -1.3456260 | -2.5218117 |
| H | -2.8844259 | 0.2180140  | -1.6921688 |
| H | -2.9113616 | 3.5341308  | 0.5071223  |
| H | -1.6189650 | 3.7634693  | -0.7101063 |
| H | -2.8642522 | 2.4879369  | -0.9532337 |
| H | -3.2096294 | 0.4992753  | 0.6931347  |
| H | -2.9704812 | 1.4606730  | 2.1945279  |

H -1.9884515 -0.0034371 1.9204204

4a\_c\_sy\_1\_ts2.log

E = -1145.523943

H = -1145.243641

G = -1145.307250

NImag=1

|   |            |            |            |
|---|------------|------------|------------|
| C | -1.7620480 | 1.8325283  | 1.1138085  |
| C | -2.2119651 | 0.5969103  | 0.3926087  |
| C | -1.1796783 | 2.7195031  | 0.1890554  |
| O | -0.5806355 | 3.7893241  | 0.3197575  |
| C | -1.0796559 | -0.2523099 | 0.8793084  |
| C | 0.3630323  | -0.1129884 | 0.5309500  |
| C | 1.2884768  | -0.4651820 | 1.5282884  |
| C | 2.6544018  | -0.4373128 | 1.2871729  |
| C | 3.1141691  | -0.0517844 | 0.0223533  |
| C | 2.2095107  | 0.2927732  | -0.9885770 |
| C | 0.8442349  | 0.2507166  | -0.7371151 |
| O | -1.3635836 | 2.2254988  | -1.1075743 |
| C | -2.2313183 | 1.0888451  | -1.0549260 |
| S | -1.4067592 | -2.4203025 | 0.3185927  |
| C | -3.1361688 | -2.4285038 | -0.2066784 |
| C | -0.5976900 | -2.5875055 | -1.2869405 |
| C | 4.5269238  | -0.0169624 | -0.2439130 |
| N | 5.6648643  | 0.0102364  | -0.4585657 |
| H | -1.7884009 | 1.9901282  | 2.1818501  |
| H | -3.1716637 | 0.1715111  | 0.6919715  |
| H | -1.2108076 | -0.4787441 | 1.9366573  |
| H | 0.9276768  | -0.7585081 | 2.5103018  |
| H | 3.3594065  | -0.7065129 | 2.0664873  |
| H | 2.5753444  | 0.5803516  | -1.9687166 |
| H | 0.1660316  | 0.5031105  | -1.5403307 |
| H | -3.2488147 | 1.4071714  | -1.3087615 |
| H | -1.8992078 | 0.3532188  | -1.7927202 |
| H | -3.3696078 | -3.4178490 | -0.6062633 |
| H | -3.7568436 | -2.2358885 | 0.6699048  |
| H | -3.3080487 | -1.6664891 | -0.9700517 |
| H | -0.9141367 | -3.5341821 | -1.7307726 |
| H | 0.4809473  | -2.6069996 | -1.1224550 |
| H | -0.8689979 | -1.7550173 | -1.9396737 |

4a\_c\_sy\_2.log

E = -1145.541329

H = -1145.259776

G = -1145.323806

NImag=0

|   |            |            |            |
|---|------------|------------|------------|
| C | 2.7327793  | 1.0888515  | -0.6519270 |
| C | 2.1636596  | -0.2324739 | -0.2175787 |
| C | 3.7423124  | 1.4955536  | 0.2134121  |
| O | 4.4171510  | 2.5353676  | 0.3173897  |
| C | 0.7748373  | -0.1800982 | 0.4724674  |
| C | -0.4306240 | -0.1800918 | -0.4294069 |
| C | -0.4023031 | 0.4185637  | -1.6958603 |
| C | -1.5294199 | 0.4061109  | -2.5077567 |
| C | -2.6995810 | -0.2125795 | -2.0512671 |
| C | -2.7421558 | -0.8251403 | -0.7944548 |
| C | -1.6053530 | -0.8071702 | 0.0050921  |
| O | 3.9901462  | 0.4752821  | 1.1588537  |
| C | 3.2735526  | -0.6882269 | 0.7550236  |
| S | 0.8072812  | 1.3091413  | 1.5944150  |



|   |            |            |            |
|---|------------|------------|------------|
| C | 0.0098313  | 2.6495312  | 0.6887447  |
| C | -0.5121176 | 0.9211220  | 2.7645470  |
| C | -3.8689708 | -0.2277452 | -2.8900884 |
| N | -4.8103955 | -0.2392807 | -3.5643521 |
| H | 2.3525477  | 1.7226327  | -1.4412688 |
| H | 2.0499944  | -0.9817549 | -1.0118354 |
| H | 0.6717986  | -1.0028712 | 1.1903978  |
| H | 0.5016746  | 0.8956454  | -2.0579602 |
| H | -1.5067782 | 0.8685881  | -3.4889253 |
| H | -3.6495094 | -1.3135225 | -0.4552118 |
| H | -1.6262618 | -1.2972422 | 0.9747416  |
| H | 3.9608321  | -1.3666903 | 0.2343924  |
| H | 2.8914513  | -1.1919344 | 1.6491858  |
| H | 0.6389705  | 2.8925693  | -0.1669443 |
| H | -0.9941046 | 2.3502999  | 0.3819774  |
| H | -0.0341221 | 3.4954610  | 1.3785497  |
| H | -0.5862528 | 1.7684321  | 3.4490803  |
| H | -0.2206714 | 0.0254166  | 3.3159833  |
| H | -1.4583991 | 0.7725531  | 2.2414841  |

4a\_c\_sy\_2\_r.log

E = -1145.536344  
H = -1145.254624  
G = -1145.318996

NImag=0

|   |            |            |            |
|---|------------|------------|------------|
| C | -0.8015191 | -2.1883137 | -0.3884760 |
| C | -1.4462273 | -0.9909316 | -1.0162708 |
| C | -1.5048693 | -2.5748037 | 0.7459777  |
| O | -1.3022571 | -3.4038173 | 1.6499763  |
| C | -0.6032794 | 0.2951655  | -0.7936710 |
| C | -0.1013288 | 0.6450704  | 0.5829838  |
| C | -0.9095532 | 0.5529214  | 1.7246531  |
| C | -0.4136595 | 0.9160292  | 2.9696830  |
| C | 0.9029403  | 1.3821286  | 3.0799027  |
| C | 1.7240508  | 1.4772997  | 1.9528017  |
| C | 1.2144682  | 1.1058770  | 0.7133052  |
| O | -2.7074064 | -1.8247955 | 0.8311165  |
| C | -2.8428047 | -1.0679887 | -0.3665023 |
| S | -1.4872990 | 1.7511751  | -1.5893696 |
| C | -2.2469087 | 2.6954867  | -0.2535292 |
| C | -0.1235745 | 2.8523003  | -2.0127218 |
| C | 1.4158310  | 1.7659007  | 4.3685239  |
| N | 1.8279608  | 2.0773590  | 5.4050120  |
| H | 0.2000407  | -2.5340585 | -0.6106726 |
| H | -1.5665739 | -1.0516669 | -2.1059758 |
| H | 0.2608723  | 0.2111493  | -1.4632346 |
| H | -1.9272882 | 0.1849382  | 1.6532489  |
| H | -1.0385062 | 0.8413501  | 3.8535490  |
| H | 2.7445705  | 1.8327477  | 2.0477292  |
| H | 1.8518370  | 1.1672109  | -0.1647071 |
| H | -3.5204461 | -1.5970947 | -1.0474285 |
| H | -3.2954331 | -0.1008436 | -0.1206134 |
| H | -3.0066184 | 2.0795292  | 0.2281355  |
| H | -1.4843510 | 3.0154299  | 0.4583059  |
| H | -2.7205615 | 3.5576797  | -0.7282471 |
| H | -0.5623185 | 3.7609064  | -2.4298025 |
| H | 0.4871467  | 2.3513916  | -2.7654358 |
| H | 0.4565322  | 3.0806781  | -1.1163515 |

4a\_c\_sy\_2\_ts1.log

```

E =      -1145.510667
H =      -1145.231318
G =      -1145.295834
NImag=1
C        -1.4584589      -1.8901492      0.1288860
C        -1.3615703      -1.2258360     -1.0863826
C        -2.7849683      -1.7124689      0.6443377
O        -3.2980215      -2.0391512      1.7056714
C        -0.4461942       0.7148291     -1.0030935
C         0.9091975       0.4321076     -0.5818370
C         1.3370041       0.4094187      0.7647500
C         2.6234730       0.0155238      1.1034303
C         3.5233881      -0.3817639      0.1055884
C         3.1180613      -0.3797041     -1.2405512
C         1.8373408       0.0224521     -1.5707720
O        -3.5407165      -1.0273635     -0.2904773
C        -2.7807814      -0.9172756     -1.4988669
S        -1.4710757       1.8551255     -0.1566157
C        -1.8253350       1.2240264      1.5144597
C        -0.4869669       3.3253983      0.2473215
C         4.8511021      -0.7883517      0.4567124
N         5.9267856      -1.1178748      0.7402655
H        -0.6733585      -2.3904972      0.6786324
H        -0.6246044      -1.4584002     -1.8482948
H        -0.5755003       0.9135485     -2.0655933
H         0.6697387       0.7078254      1.5655578
H         2.9342149       0.0121241      2.1434931
H         3.8140885      -0.6856311     -2.0153794
H         1.5330106       0.0304261     -2.6139089
H        -3.1328312      -1.6750833     -2.2104775
H        -2.9415599       0.0721834     -1.9310702
H        -1.5209009       0.1800779      1.5755291
H        -1.2762415       1.8214219      2.2441756
H        -2.8996731       1.3152106      1.6760571
H        -1.1270206       3.9953563      0.8259770
H        -0.2094809       3.7924406     -0.6988123
H         0.3983390       3.0439952      0.8195366

```

```

4a_c_sy_2_ts2.log
E =      -1145.525706
H =      -1145.245502
G =      -1145.309361
NImag=1
C         2.2120375       1.5225239     -1.0504695
C         2.4141978       0.2962754     -0.2100368
C         1.5982948       2.5186638     -0.2669628
O         1.1195048       3.6215246     -0.5418438
C         1.2374440      -0.4315614     -0.7792982
C        -0.1956568      -0.1091322     -0.5522968
C        -0.7399447       0.2181685      0.6996808
C        -2.1054942       0.4354267      0.8409283
C        -2.9457571       0.3189951     -0.2714870
C        -2.4239591      -0.0166609     -1.5275113
C        -1.0600094      -0.2318535     -1.6542034
O         1.5589264       2.0982896      1.0659860
C         2.3320075       0.9010707      1.1918471
S         1.3966215      -2.5887690     -0.1249057
C         1.2669486      -2.5116034      1.6728505
C        -0.2262375      -3.2696259     -0.5263745
C        -4.3590312       0.5402479     -0.1210047
N        -5.4972731       0.7174982     -0.0003235

```

|   |            |            |            |
|---|------------|------------|------------|
| H | 2.3690921  | 1.5939610  | -2.1167660 |
| H | 3.3367427  | -0.2735983 | -0.3539474 |
| H | 1.4284411  | -0.7108646 | -1.8146929 |
| H | -0.1121403 | 0.3051978  | 1.5759413  |
| H | -2.5205995 | 0.6885705  | 1.8107967  |
| H | -3.0812865 | -0.1069725 | -2.3858701 |
| H | -0.6487266 | -0.4941786 | -2.6249796 |
| H | 3.3454277  | 1.1654253  | 1.5157659  |
| H | 1.8775091  | 0.2632208  | 1.9524195  |
| H | 2.1980952  | -2.0950586 | 2.0606348  |
| H | 0.4161777  | -1.8932166 | 1.9681848  |
| H | 1.1377025  | -3.5277259 | 2.0523760  |
| H | -0.2647609 | -4.3046855 | -0.1799314 |
| H | -0.3436795 | -3.2429527 | -1.6115619 |
| H | -1.0117225 | -2.6805485 | -0.0460523 |

4a\_c\_sy\_3.log

E = -1145.541560  
H = -1145.259924  
G = -1145.323898

NImag=0

|   |            |            |            |
|---|------------|------------|------------|
| C | 2.6691217  | 1.0126870  | -0.6660035 |
| C | 1.9619781  | -0.1709614 | -0.0763022 |
| C | 3.8148506  | 1.3232377  | 0.0522555  |
| O | 4.6630722  | 2.2296026  | -0.0231366 |
| C | 0.5689908  | 0.0961335  | 0.5740605  |
| C | -0.5944486 | -0.0426702 | -0.3787567 |
| C | -1.6220808 | -0.9415443 | -0.0770682 |
| C | -2.6956719 | -1.1076185 | -0.9449392 |
| C | -2.7427510 | -0.3549690 | -2.1230593 |
| C | -1.7238210 | 0.5536007  | -2.4360302 |
| C | -0.6540413 | 0.7037638  | -1.5630069 |
| O | 3.9870540  | 0.3797646  | 1.0979860  |
| C | 3.0307073  | -0.6638693 | 0.9304215  |
| S | 0.5092335  | 1.8135787  | 1.2514399  |
| C | -1.0906316 | 1.7779171  | 2.0930388  |
| C | 1.6007220  | 1.7188224  | 2.6839090  |
| C | -3.8525426 | -0.5151861 | -3.0251114 |
| N | -4.7458251 | -0.6439526 | -3.7507403 |
| H | 2.3361195  | 1.5901313  | -1.5174786 |
| H | 1.7533947  | -0.9807038 | -0.7881774 |
| H | 0.4081782  | -0.5588948 | 1.4385223  |
| H | -1.5804851 | -1.5178324 | 0.8427146  |
| H | -3.4911790 | -1.8078190 | -0.7128548 |
| H | -1.7736331 | 1.1311433  | -3.3531190 |
| H | 0.1352831  | 1.4075408  | -1.8099247 |
| H | 3.5410530  | -1.5449299 | 0.5252614  |
| H | 2.6142273  | -0.9210417 | 1.9103074  |
| H | -1.1380829 | 2.6744376  | 2.7144230  |
| H | -1.8742955 | 1.8147266  | 1.3350747  |
| H | -1.1747064 | 0.8777757  | 2.7053616  |
| H | 1.4739524  | 2.6530993  | 3.2344223  |
| H | 2.6291959  | 1.6249905  | 2.3320025  |
| H | 1.3107616  | 0.8648398  | 3.2999081  |

4a\_c\_sy\_3\_ts1.log

E = -1145.513676  
H = -1145.234925  
G = -1145.300727

NImag=1

|   |            |            |            |
|---|------------|------------|------------|
| C | 1.5298982  | -1.7171156 | -0.6036361 |
| C | 1.1561280  | -1.3487801 | 0.6792933  |
| C | 2.9590583  | -1.6427119 | -0.7130007 |
| O | 3.7156021  | -1.8072095 | -1.6588637 |
| C | 0.3625860  | 0.6955845  | 0.7648103  |
| C | -1.0171980 | 0.4346467  | 0.4412312  |
| C | -1.9132826 | 0.1268837  | 1.4965638  |
| C | -3.2181343 | -0.2544033 | 1.2489488  |
| C | -3.6842103 | -0.3449970 | -0.0751889 |
| C | -2.8158709 | -0.0511127 | -1.1373865 |
| C | -1.5081862 | 0.3296554  | -0.8839067 |
| O | 3.4883077  | -1.3404663 | 0.5313220  |
| C | 2.4277118  | -1.3178034 | 1.4925863  |
| S | 1.2754883  | 1.5708201  | -0.4519531 |
| C | 0.6340858  | 3.2658913  | -0.4437952 |
| C | 2.8641661  | 1.8417472  | 0.3510734  |
| C | -5.0362722 | -0.7321209 | -0.3380204 |
| N | -6.1330402 | -1.0473325 | -0.5501818 |
| H | 0.8892290  | -1.9687344 | -1.4374033 |
| H | 0.2308060  | -1.6446816 | 1.1620733  |
| H | 0.5761932  | 1.0506922  | 1.7729201  |
| H | -1.5617076 | 0.1968482  | 2.5223248  |
| H | -3.8875476 | -0.4804917 | 2.0733168  |
| H | -3.1719844 | -0.1224184 | -2.1605085 |
| H | -0.8639936 | 0.5487490  | -1.7313231 |
| H | 2.4939353  | -2.2204714 | 2.1123884  |
| H | 2.5455844  | -0.4406210 | 2.1327335  |
| H | 1.2305013  | 3.8566449  | -1.1425295 |
| H | -0.4023453 | 3.2220670  | -0.7833268 |
| H | 0.6950564  | 3.6680098  | 0.5689105  |
| H | 3.3859383  | 2.6024807  | -0.2325976 |
| H | 3.4289047  | 0.9091521  | 0.3285552  |
| H | 2.6973532  | 2.1861140  | 1.3737550  |

4a\_c\_sy\_4.log

E = -1145.540016

H = -1145.258397

G = -1145.323300

NImag=0

|   |            |            |            |
|---|------------|------------|------------|
| C | 3.1130607  | 1.7000422  | 0.0736915  |
| C | 2.0021813  | 0.9538251  | -0.6014505 |
| C | 3.9606525  | 0.7941414  | 0.7017889  |
| O | 4.9011474  | 0.9052249  | 1.5069687  |
| C | 0.7324368  | 0.7381132  | 0.2781099  |
| C | -0.4872068 | 0.3056266  | -0.4909519 |
| C | -0.9717702 | 1.0700435  | -1.5614045 |
| C | -2.0863998 | 0.6527030  | -2.2765426 |
| C | -2.7162858 | -0.5481546 | -1.9246644 |
| C | -2.2410659 | -1.3238842 | -0.8620230 |
| C | -1.1303044 | -0.8876402 | -0.1481765 |
| O | 3.6087354  | -0.5206042 | 0.2999963  |
| C | 2.6880458  | -0.4091470 | -0.7833413 |
| S | 0.3869341  | 2.3088327  | 1.2119335  |
| C | -1.3187390 | 2.0893960  | 1.7642977  |
| C | 1.2291957  | 2.0110312  | 2.7831571  |
| C | -3.8676376 | -0.9898299 | -2.6666067 |
| N | -4.7941746 | -1.3456779 | -3.2632343 |
| H | 3.1304188  | 2.7649258  | 0.2687478  |
| H | 1.6822421  | 1.3591549  | -1.5668541 |
| H | 0.9518857  | 0.0140215  | 1.0713866  |
| H | -0.4852275 | 2.0020411  | -1.8384087 |

|   |            |            |            |
|---|------------|------------|------------|
| H | -2.4676726 | 1.2448869  | -3.1016048 |
| H | -2.7380958 | -2.2519413 | -0.5998550 |
| H | -0.7572237 | -1.4796575 | 0.6826401  |
| H | 3.2390404  | -0.4206186 | -1.7326875 |
| H | 2.0038588  | -1.2635091 | -0.7521710 |
| H | -1.5029140 | 2.8645521  | 2.5111850  |
| H | -1.9834240 | 2.2328703  | 0.9120957  |
| H | -1.4411430 | 1.0954858  | 2.1996036  |
| H | 0.9898956  | 2.8524800  | 3.4368180  |
| H | 2.2992180  | 1.9700898  | 2.5811033  |
| H | 0.8659356  | 1.0718766  | 3.2055531  |

4a\_c\_sy\_4\_ts1.log

E = -1145.513067  
H = -1145.234213  
G = -1145.299588

NImag=1

|   |            |            |            |
|---|------------|------------|------------|
| C | 2.5944060  | -0.8583739 | -1.1979275 |
| C | 1.2886739  | -1.0713779 | -0.7823032 |
| C | 3.4807771  | -1.4923633 | -0.2627204 |
| O | 4.7005013  | -1.4815951 | -0.1656897 |
| C | 0.4481593  | 0.5072469  | 0.4665856  |
| C | -0.9649981 | 0.2864315  | 0.3075590  |
| C | -1.6934044 | 0.7006562  | -0.8360943 |
| C | -3.0248518 | 0.3609929  | -1.0030966 |
| C | -3.6804840 | -0.4162531 | -0.0350290 |
| C | -2.9778641 | -0.8458277 | 1.1046140  |
| C | -1.6500453 | -0.4974982 | 1.2700407  |
| O | 2.7321845  | -2.2113999 | 0.6456732  |
| C | 1.3587379  | -2.1774353 | 0.2408104  |
| S | 1.1347043  | 1.9349573  | -0.3015817 |
| C | 0.3332183  | 3.3756868  | 0.4507298  |
| C | 2.7362845  | 2.0244053  | 0.5192706  |
| C | -5.0568322 | -0.7669758 | -0.2079230 |
| N | -6.1730754 | -1.0522602 | -0.3488323 |
| H | 2.9432585  | -0.2310400 | -2.0069308 |
| H | 0.4204353  | -0.9879446 | -1.4299085 |
| H | 0.8592801  | 0.3653662  | 1.4659175  |
| H | -1.2115635 | 1.2945817  | -1.6092100 |
| H | -3.5646894 | 0.6918729  | -1.8850751 |
| H | -3.4838812 | -1.4430325 | 1.8569883  |
| H | -1.1194943 | -0.8200951 | 2.1616668  |
| H | 1.1064511  | -3.1369483 | -0.2284540 |
| H | 0.7322586  | -2.0384647 | 1.1234905  |
| H | 0.8425764  | 4.2699131  | 0.0838979  |
| H | -0.7086710 | 3.3819339  | 0.1256013  |
| H | 0.4025781  | 3.2969468  | 1.5370900  |
| H | 3.2371094  | 2.9252650  | 0.1612704  |
| H | 3.3074571  | 1.1397483  | 0.2391017  |
| H | 2.5757385  | 2.0666297  | 1.5985193  |

4a\_c\_sy\_5.log

E = -1145.536186  
H = -1145.254202  
G = -1145.319337

NImag=0

|   |           |           |            |
|---|-----------|-----------|------------|
| C | 3.0120380 | 1.5548430 | 0.5419622  |
| C | 1.8037839 | 1.2234189 | -0.2827873 |
| C | 3.8958216 | 0.4821721 | 0.5447322  |
| O | 4.9471592 | 0.2301945 | 1.1596318  |

|   |            |            |            |
|---|------------|------------|------------|
| C | 0.5779981  | 0.6622215  | 0.4951721  |
| C | -0.5642335 | 0.2059476  | -0.3850617 |
| C | -1.0729033 | -1.0888849 | -0.2371007 |
| C | -2.1044307 | -1.5427226 | -1.0501542 |
| C | -2.6358003 | -0.6857008 | -2.0208627 |
| C | -2.1385540 | 0.6129667  | -2.1804354 |
| C | -1.1030950 | 1.0510257  | -1.3636426 |
| O | 3.4342371  | -0.5008001 | -0.3667250 |
| C | 2.3962211  | 0.0870484  | -1.1434223 |
| S | -0.1554656 | 1.8392216  | 1.7311124  |
| C | 0.8849104  | 1.6694884  | 3.1943316  |
| C | 0.2609302  | 3.4928300  | 1.1452366  |
| C | -3.7051018 | -1.1449469 | -2.8672881 |
| N | -4.5658715 | -1.5142943 | -3.5483307 |
| H | 3.1298689  | 2.4073347  | 1.1963806  |
| H | 1.4456580  | 2.0280522  | -0.9350376 |
| H | 0.9045426  | -0.1662267 | 1.1356379  |
| H | -0.6532141 | -1.7486043 | 0.5170005  |
| H | -2.4963912 | -2.5481417 | -0.9378938 |
| H | -2.5584751 | 1.2666884  | -2.9377019 |
| H | -0.7169074 | 2.0569842  | -1.5007714 |
| H | 2.8266782  | 0.5185974  | -2.0567542 |
| H | 1.6824743  | -0.6945416 | -1.4193166 |
| H | 0.5153525  | 2.3938759  | 3.9232497  |
| H | 0.7402195  | 0.6557040  | 3.5722070  |
| H | 1.9275486  | 1.8509988  | 2.9398457  |
| H | -0.1171244 | 4.1845114  | 1.9011154  |
| H | -0.2663519 | 3.6575631  | 0.2038243  |
| H | 1.3381776  | 3.6012755  | 1.0237461  |

4a\_c\_sy\_5\_ts1.log

E = -1145.509045

H = -1145.229947

G = -1145.294379

NImag=1

|   |            |            |            |
|---|------------|------------|------------|
| C | -2.8772787 | -0.6301006 | 0.8646449  |
| C | -1.5025627 | -0.6497165 | 1.0373418  |
| C | -3.2632663 | -1.7791290 | 0.0928311  |
| O | -4.3432974 | -2.1157368 | -0.3723919 |
| C | -0.4660858 | 0.5208031  | -0.5002793 |
| C | 0.9552918  | 0.3085740  | -0.3809580 |
| C | 1.5821928  | -0.7259245 | -1.1208404 |
| C | 2.9235127  | -1.0194182 | -0.9591966 |
| C | 3.6991967  | -0.2807731 | -0.0479163 |
| C | 3.1029974  | 0.7482900  | 0.6982290  |
| C | 1.7565289  | 1.0287489  | 0.5399274  |
| O | -2.1585586 | -2.5790669 | -0.0993164 |
| C | -1.0633557 | -2.0381043 | 0.6454246  |
| S | -0.9685296 | 2.2148973  | -0.3758342 |
| C | -2.4840776 | 2.2216416  | -1.3516296 |
| C | -1.6494106 | 2.5305163  | 1.2785188  |
| C | 5.0888414  | -0.5774379 | 0.1203155  |
| N | 6.2161162  | -0.8181551 | 0.2566637  |
| H | -3.5857613 | 0.1383899  | 1.1379248  |
| H | -0.9532357 | -0.1175546 | 1.8071874  |
| H | -0.9626043 | 0.0614799  | -1.3529596 |
| H | 0.9956777  | -1.2873020 | -1.8433657 |
| H | 3.3842937  | -1.8105751 | -1.5426718 |
| H | 3.6986109  | 1.3159412  | 1.4065003  |
| H | 1.3196278  | 1.8158122  | 1.1499760  |
| H | -0.9134631 | -2.6463455 | 1.5465799  |

|   |            |            |            |
|---|------------|------------|------------|
| H | -0.1616427 | -2.0918544 | 0.0342704  |
| H | -2.9711854 | 3.1862679  | -1.1984131 |
| H | -2.2009007 | 2.1031549  | -2.3983869 |
| H | -3.1237620 | 1.4007804  | -1.0222737 |
| H | -1.9041496 | 3.5924547  | 1.2969470  |
| H | -0.8632319 | 2.3312208  | 2.0086737  |
| H | -2.5301042 | 1.9208207  | 1.4711373  |

4a\_c\_sy\_6.log

E = -1145.541383  
H = -1145.259511  
G = -1145.324500

NImag=0

|   |            |            |            |
|---|------------|------------|------------|
| C | 3.1219277  | 1.6257936  | 0.5480957  |
| C | 1.9627626  | 1.2174668  | -0.3113625 |
| C | 4.0670225  | 0.6067249  | 0.5822905  |
| O | 5.1150344  | 0.4193955  | 1.2242948  |
| C | 0.7661563  | 0.6008995  | 0.4670704  |
| C | -0.4332447 | 0.2089729  | -0.3545275 |
| C | -0.9257960 | 1.0287615  | -1.3790715 |
| C | -2.0285727 | 0.6351534  | -2.1286748 |
| C | -2.6433654 | -0.5917369 | -1.8556188 |
| C | -2.1593404 | -1.4259533 | -0.8410083 |
| C | -1.0583726 | -1.0185956 | -0.0987407 |
| O | 3.6897861  | -0.4062159 | -0.3377137 |
| C | 2.6352374  | 0.1092229  | -1.1435533 |
| S | 0.3382272  | 1.7481309  | 1.8575922  |
| C | -0.1597181 | 3.2792387  | 1.0514801  |
| C | -1.2510301 | 1.1407493  | 2.4492905  |
| C | -3.7840522 | -1.0030795 | -2.6307768 |
| N | -4.7025436 | -1.3339131 | -3.2536089 |
| H | 3.1504613  | 2.4836499  | 1.2078028  |
| H | 1.5773858  | 1.9995974  | -0.9738846 |
| H | 1.1325888  | -0.2702838 | 1.0246711  |
| H | -0.4526563 | 1.9786569  | -1.6061307 |
| H | -2.4097164 | 1.2697174  | -2.9216947 |
| H | -2.6400879 | -2.3779063 | -0.6418564 |
| H | -0.6755979 | -1.6613080 | 0.6892442  |
| H | 3.0574353  | 0.5474397  | -2.0572232 |
| H | 1.9667997  | -0.7134353 | -1.4164667 |
| H | -0.4548487 | 3.9632774  | 1.8498355  |
| H | 0.7064773  | 3.6825437  | 0.5241558  |
| H | -0.9962139 | 3.0995934  | 0.3745401  |
| H | -1.5478746 | 1.7976782  | 3.2694187  |
| H | -1.1017357 | 0.1263546  | 2.8245062  |
| H | -1.9911354 | 1.1625093  | 1.6476244  |

4a\_c\_sy\_6\_ts1.log

E = -1145.511051  
H = -1145.231721  
G = -1145.297117

NImag=1

|   |            |            |            |
|---|------------|------------|------------|
| C | -2.9900306 | -0.4756320 | 0.9152102  |
| C | -1.6308769 | -0.7465565 | 0.9215355  |
| C | -3.6435235 | -1.4249682 | 0.0581109  |
| O | -4.8048899 | -1.5166815 | -0.3143440 |
| C | -0.5340165 | 0.4103821  | -0.5633784 |
| C | 0.8746753  | 0.1614263  | -0.3663220 |
| C | 1.6449320  | 0.7495324  | 0.6655224  |
| C | 2.9697270  | 0.3971479  | 0.8661684  |

|   |            |            |            |
|---|------------|------------|------------|
| C | 3.5717567  | -0.5738243 | 0.0517044  |
| C | 2.8241124  | -1.1882030 | -0.9672443 |
| C | 1.5057284  | -0.8222117 | -1.1689163 |
| O | -2.7191065 | -2.3596219 | -0.3611390 |
| C | -1.4808734 | -2.1184224 | 0.3135582  |
| S | -1.2577303 | 1.9971333  | -0.4396734 |
| C | -1.2623728 | 2.5661633  | 1.2825278  |
| C | -0.1136709 | 3.2072572  | -1.1467480 |
| C | 4.9403350  | -0.9388366 | 0.2612493  |
| N | 6.0495237  | -1.2346960 | 0.4307534  |
| H | -3.5082202 | 0.3631251  | 1.3600469  |
| H | -0.9270635 | -0.4240038 | 1.6832431  |
| H | -0.9709199 | -0.0518924 | -1.4472227 |
| H | 1.2052138  | 1.4834877  | 1.3314034  |
| H | 3.5424596  | 0.8650210  | 1.6609359  |
| H | 3.2870809  | -1.9389279 | -1.6002463 |
| H | 0.9408088  | -1.2878011 | -1.9720040 |
| H | -1.3600211 | -2.8648020 | 1.1089731  |
| H | -0.6603083 | -2.2263838 | -0.3983289 |
| H | -1.9492155 | 3.4145610  | 1.3142785  |
| H | -1.6388013 | 1.7669765  | 1.9202243  |
| H | -0.2667153 | 2.8827414  | 1.5910773  |
| H | -0.5387811 | 4.1995592  | -0.9793948 |
| H | -0.0435633 | 3.0012942  | -2.2157271 |
| H | 0.8636952  | 3.1198018  | -0.6686007 |

4a\_sy\_c\_prod\_1.log

E = -667.654360

H = -667.456235

G = -667.507922

NImag=0

|   |            |            |            |
|---|------------|------------|------------|
| C | -0.2880318 | -0.8113894 | -1.9503016 |
| C | 1.0712126  | -0.2383514 | -1.7393845 |
| C | 1.3500878  | 0.5965112  | -2.9667191 |
| C | 0.0937271  | 0.5078032  | -3.8095369 |
| O | -0.7470503 | -0.4814977 | -3.1766569 |
| O | -0.9459267 | -1.4752749 | -1.1850349 |
| C | 2.1072479  | -0.6741845 | -2.7560454 |
| C | 1.9261914  | -1.8796364 | -3.6250632 |
| C | 1.5319752  | -3.1067703 | -3.0796092 |
| C | 1.4020341  | -4.2317827 | -3.8853856 |
| C | 1.6714347  | -4.1267421 | -5.2553623 |
| C | 2.0710099  | -2.9072692 | -5.8162044 |
| C | 2.1950077  | -1.7921224 | -4.9961893 |
| H | 3.1255282  | -0.5325734 | -2.4013242 |
| H | 1.3669124  | 0.0185464  | -0.7309358 |
| H | 1.8613383  | 1.5483422  | -2.8978954 |
| C | 1.5398234  | -5.2864034 | -6.0964359 |
| N | 1.4349080  | -6.2202357 | -6.7737422 |
| H | 0.2679088  | 0.1824043  | -4.8376958 |
| H | -0.4463412 | 1.4573542  | -3.8121621 |
| H | 1.3295098  | -3.1837316 | -2.0150516 |
| H | 1.0968834  | -5.1834824 | -3.4627371 |
| H | 2.2781085  | -2.8397201 | -6.8791804 |
| H | 2.5050009  | -0.8419938 | -5.4226461 |

4a\_sy\_tr\_prod\_1.log

E = -667.656197

H = -667.457558

G = -667.508900



NImag=0

|   |            |            |            |
|---|------------|------------|------------|
| C | 1.7705066  | 2.8087346  | 0.4829261  |
| C | 0.3015561  | 2.7250809  | 0.2610230  |
| C | -0.3251916 | 3.5174981  | 1.3668905  |
| C | 0.8283008  | 4.0944399  | 2.1619855  |
| O | 2.0213240  | 3.4733109  | 1.6330791  |
| O | 2.6603600  | 2.3701585  | -0.2049333 |
| C | -0.4308141 | 2.0239222  | 1.4010585  |
| C | -1.7258085 | 1.3552984  | 1.1108373  |
| C | -2.6461879 | 1.8826642  | 0.1928118  |
| C | -3.8533693 | 1.2410255  | -0.0475734 |
| C | -4.1526787 | 0.0543781  | 0.6347317  |
| C | -3.2446357 | -0.4858145 | 1.5527992  |
| C | -2.0402143 | 0.1670632  | 1.7827724  |
| H | 0.1904010  | 1.5042211  | 2.1278217  |
| H | -0.0757424 | 2.6484612  | -0.7512651 |
| H | -1.2146199 | 4.1165677  | 1.2083884  |
| C | -5.4015591 | -0.6134595 | 0.3887765  |
| N | -6.4082757 | -1.1516906 | 0.1907343  |
| H | 0.7807813  | 3.8656571  | 3.2285603  |
| H | 0.9156234  | 5.1735046  | 2.0154498  |
| H | -2.4258139 | 2.8011545  | -0.3441205 |
| H | -4.5632980 | 1.6516468  | -0.7580841 |
| H | -3.4831945 | -1.4056897 | 2.0766626  |
| H | -1.3321497 | -0.2484332 | 2.4936676  |

4a\_tr\_sy\_1.log

E = -1145.539079

H = -1145.257262

G = -1145.321585

NImag=0

|   |            |            |            |
|---|------------|------------|------------|
| C | 0.6121055  | 1.7886866  | -2.9154647 |
| C | -0.5592932 | 1.1589993  | -2.2256190 |
| C | 1.7533494  | 1.0459407  | -2.6568816 |
| O | 2.9721199  | 1.2386814  | -2.8219922 |
| C | -0.9424388 | 1.8429345  | -0.8745719 |
| C | -2.2809083 | 1.3958187  | -0.3322308 |
| C | -2.4725797 | 0.1716273  | 0.3215735  |
| C | -3.7399822 | -0.2138827 | 0.7416521  |
| C | -4.8307222 | 0.6289176  | 0.4998212  |
| C | -4.6557209 | 1.8541517  | -0.1530287 |
| C | -3.3815129 | 2.2303849  | -0.5591774 |
| O | 1.3842190  | -0.1620435 | -2.0052939 |
| C | -0.0341598 | -0.2794459 | -2.0929744 |
| S | 0.3464903  | 1.5811571  | 0.4325609  |
| C | 1.6929049  | 2.7131399  | 0.0125287  |
| C | -0.3843688 | 2.5093700  | 1.7998364  |
| C | -6.1449086 | 0.2351672  | 0.9330436  |
| N | -7.2030351 | -0.0809769 | 1.2817343  |
| H | 0.6468408  | 2.8197481  | -3.2448421 |
| H | -1.4978929 | 1.1623472  | -2.7936984 |
| H | -0.9564582 | 2.9281462  | -1.0244757 |
| H | -1.6375584 | -0.4914576 | 0.5296755  |
| H | -3.8845581 | -1.1587192 | 1.2547749  |
| H | -5.5063153 | 2.5035823  | -0.3315121 |
| H | -3.2385323 | 3.1832561  | -1.0603894 |
| H | -0.2971283 | -0.8427956 | -2.9969657 |
| H | -0.3907593 | -0.8330575 | -1.2205131 |
| H | 2.2313332  | 2.8836381  | 0.9480758  |
| H | 2.3487247  | 2.2372850  | -0.7166376 |
| H | 1.2749488  | 3.6460273  | -0.3702281 |

|   |            |           |           |
|---|------------|-----------|-----------|
| H | 0.3870526  | 2.5974121 | 2.5669451 |
| H | -1.2303266 | 1.9436034 | 2.1904860 |
| H | -0.6960293 | 3.4944562 | 1.4455888 |

4a\_tr\_sy\_1\_r.log

E = -1145.538032  
H = -1145.256564  
G = -1145.322058

NImag=0

|   |            |            |            |
|---|------------|------------|------------|
| C | -1.5790918 | -1.7790448 | -0.5666383 |
| C | -1.2160880 | -1.1929691 | 0.7680007  |
| C | -0.7049955 | -2.8074006 | -0.8976537 |
| O | -0.5332970 | -3.5010270 | -1.9157704 |
| C | -0.4153140 | 0.1292640  | 0.6044020  |
| C | -0.9903808 | 1.0830397  | -0.4159805 |
| C | -2.3371994 | 1.4622536  | -0.3534938 |
| C | -2.8630249 | 2.3427161  | -1.2892894 |
| C | -2.0312002 | 2.8478122  | -2.2974601 |
| C | -0.6841361 | 2.4781397  | -2.3698358 |
| C | -0.1706207 | 1.5985230  | -1.4227009 |
| O | 0.1446715  | -3.0674074 | 0.2031521  |
| C | -0.3581108 | -2.3504470 | 1.3252891  |
| S | -0.4066646 | 1.1058422  | 2.1948308  |
| C | 0.5830835  | 0.1349272  | 3.3470935  |
| C | 0.7511197  | 2.4361881  | 1.8157025  |
| C | -2.5698766 | 3.7600280  | -3.2715154 |
| N | -3.0025805 | 4.4951558  | -4.0547574 |
| H | -2.2561030 | -1.3267769 | -1.2785727 |
| H | -2.0690576 | -1.0024511 | 1.4343057  |
| H | 0.6379074  | -0.0779744 | 0.3798164  |
| H | -2.9845867 | 1.0620389  | 0.4227195  |
| H | -3.9062617 | 2.6371210  | -1.2471001 |
| H | -0.0518171 | 2.8755523  | -3.1567729 |
| H | 0.8742333  | 1.3053033  | -1.4686793 |
| H | -0.9948970 | -3.0147259 | 1.9238093  |
| H | 0.4965335  | -2.0385462 | 1.9284601  |
| H | 0.7919570  | 0.7913308  | 4.1948335  |
| H | -0.0138246 | -0.7126892 | 3.6855752  |
| H | 1.5102711  | -0.1846032 | 2.8676706  |
| H | 0.9641536  | 2.9493306  | 2.7555245  |
| H | 0.2626763  | 3.1216703  | 1.1222529  |
| H | 1.6623074  | 2.0165999  | 1.3845180  |

4a\_tr\_sy\_1\_ts1.log

E = -1145.513164  
H = -1145.234332  
G = -1145.299771

NImag=1

|   |            |            |            |
|---|------------|------------|------------|
| C | -2.5115320 | -1.4873563 | 1.1093282  |
| C | -1.1958264 | -1.3787506 | 0.6850606  |
| C | -3.3607581 | -1.5550664 | -0.0415253 |
| O | -4.5793783 | -1.5544224 | -0.1583607 |
| C | -0.3952798 | 0.6310522  | 0.6941866  |
| C | 1.0038634  | 0.4010155  | 0.4081119  |
| C | 1.5807607  | 0.4772989  | -0.8830947 |
| C | 2.9037208  | 0.1297615  | -1.1014572 |
| C | 3.7017156  | -0.3143700 | -0.0359662 |
| C | 3.1512415  | -0.4057293 | 1.2536274  |
| C | 1.8309998  | -0.0538680 | 1.4659714  |
| O | -2.5737277 | -1.6007362 | -1.1777701 |

|   |            |            |            |
|---|------------|------------|------------|
| C | -1.2047375 | -1.7364792 | -0.7804528 |
| S | -1.2348562 | 1.6824426  | -0.4351353 |
| C | -2.9365646 | 1.7008451  | 0.1627893  |
| C | -0.7482316 | 3.3713166  | 0.0180500  |
| C | 5.0700304  | -0.6688104 | -0.2611803 |
| N | 6.1793227  | -0.9570856 | -0.4432045 |
| H | -2.8934153 | -1.4045965 | 2.1171327  |
| H | -0.3332987 | -1.6363696 | 1.2920930  |
| H | -0.6385657 | 0.8905937  | 1.7245255  |
| H | 0.9945114  | 0.8197381  | -1.7315376 |
| H | 3.3264635  | 0.2021705  | -2.0987276 |
| H | 3.7659738  | -0.7473308 | 2.0807401  |
| H | 1.4158566  | -0.1190221 | 2.4681432  |
| H | -0.8990563 | -2.7818136 | -0.9139899 |
| H | -0.5847032 | -1.1064399 | -1.4225692 |
| H | -3.3768969 | 2.6332606  | -0.1955618 |
| H | -3.4775714 | 0.8588342  | -0.2655881 |
| H | -2.9412783 | 1.6665959  | 1.2539591  |
| H | -1.3039825 | 4.0682170  | -0.6134302 |
| H | 0.3222766  | 3.4603312  | -0.1758572 |
| H | -0.9683041 | 3.5309791  | 1.0756229  |

4a\_tr\_sy\_1\_ts1\_rot1.log

E = -1145.517008

H = -1145.238116

G = -1145.303188

NImag=1

|   |            |            |            |
|---|------------|------------|------------|
| C | -1.1916285 | -2.0842346 | -0.5220560 |
| C | -1.5381640 | -1.5292813 | 0.6997105  |
| C | 0.1563100  | -2.5764960 | -0.4453690 |
| O | 0.8753453  | -3.1087756 | -1.2804811 |
| C | -1.3115860 | 0.6443489  | 0.6807067  |
| C | 0.0827553  | 0.8157553  | 0.3616632  |
| C | 0.6077348  | 0.5851097  | -0.9343904 |
| C | 1.9739379  | 0.6086094  | -1.1668451 |
| C | 2.8637510  | 0.8633631  | -0.1137834 |
| C | 2.3652374  | 1.1130373  | 1.1790754  |
| C | 1.0032708  | 1.0918674  | 1.4051941  |
| O | 0.6159531  | -2.4222107 | 0.8467699  |
| C | -0.4467080 | -1.9249988 | 1.6633305  |
| S | -2.4310782 | 1.1202809  | -0.5839362 |
| C | -4.0350517 | 0.5625455  | 0.0201258  |
| C | -2.6417709 | 2.9100961  | -0.4019353 |
| C | 4.2743138  | 0.8905185  | -0.3560456 |
| N | 5.4184429  | 0.9127259  | -0.5501039 |
| H | -1.7749266 | -2.1124514 | -1.4326175 |
| H | -2.5476643 | -1.4257059 | 1.0792665  |
| H | -1.6435047 | 0.9865812  | 1.6618658  |
| H | -0.0573707 | 0.3852991  | -1.7684579 |
| H | 2.3593003  | 0.4228762  | -2.1648189 |
| H | 3.0531846  | 1.3276696  | 1.9910581  |
| H | 0.6230334  | 1.2916971  | 2.4033912  |
| H | -0.8001117 | -2.7328946 | 2.3162744  |
| H | -0.0632322 | -1.1119761 | 2.2842029  |
| H | -4.7941768 | 1.1177169  | -0.5338736 |
| H | -4.1365638 | -0.5019119 | -0.1907028 |
| H | -4.1125087 | 0.7668132  | 1.0901355  |
| H | -3.3865607 | 3.2435642  | -1.1278686 |
| H | -1.6755965 | 3.3698263  | -0.6178106 |
| H | -2.9580934 | 3.1306330  | 0.6194847  |

4a\_tr\_sy\_1\_ts2.log

E = -1145.528959

H = -1145.249057

G = -1145.314181

NImag=1

|   |            |            |            |
|---|------------|------------|------------|
| C | -1.5294303 | -1.9228657 | -0.5767013 |
| C | -1.6955794 | -0.5240136 | -1.0999221 |
| C | -2.6224496 | -2.2319659 | 0.2552964  |
| O | -2.8734909 | -3.1930612 | 0.9867246  |
| C | -0.8486799 | 0.1078482  | -0.0467783 |
| C | 0.6193768  | -0.1460393 | -0.0472083 |
| C | 1.3452295  | -0.1631108 | -1.2462197 |
| C | 2.7211423  | -0.3505326 | -1.2317271 |
| C | 3.3780527  | -0.5238002 | -0.0067592 |
| C | 2.6658123  | -0.5087907 | 1.1988503  |
| C | 1.2911635  | -0.3154248 | 1.1701259  |
| O | -3.5585517 | -1.1914890 | 0.1887440  |
| C | -3.1970274 | -0.3294030 | -0.8940726 |
| S | -0.8283475 | 2.3193211  | -0.3431393 |
| C | -2.3211371 | 2.8327139  | 0.5411380  |
| C | 0.4107464  | 2.8165716  | 0.8748842  |
| C | 4.8030647  | -0.7198283 | 0.0124430  |
| N | 5.9505099  | -0.8765979 | 0.0277312  |
| H | -0.6514365 | -2.5423715 | -0.6813215 |
| H | -1.3796177 | -0.3087247 | -2.1227891 |
| H | -1.3029792 | 0.1354021  | 0.9458394  |
| H | 0.8395518  | -0.0232530 | -2.1970441 |
| H | 3.2870276  | -0.3618539 | -2.1572444 |
| H | 3.1866891  | -0.6476102 | 2.1403489  |
| H | 0.7272309  | -0.3018496 | 2.0985339  |
| H | -3.7291508 | -0.6465553 | -1.7989107 |
| H | -3.4992309 | 0.6876480  | -0.6383730 |
| H | -2.1622153 | 3.8456699  | 0.9171046  |
| H | -3.1550697 | 2.8402939  | -0.1610629 |
| H | -2.5244245 | 2.1514151  | 1.3715389  |
| H | 0.3544825  | 3.9007604  | 0.9932363  |
| H | 1.3952230  | 2.5419537  | 0.4927462  |
| H | 0.2193154  | 2.3207693  | 1.8298666  |

4a\_tr\_sy\_2.log

E = -1145.532897

H = -1145.251189

G = -1145.315260

NImag=0

|   |            |            |            |
|---|------------|------------|------------|
| C | 0.7203464  | 1.8024650  | -2.7008410 |
| C | -0.5317102 | 1.2753998  | -2.0864072 |
| C | 1.7415590  | 0.8706405  | -2.6336383 |
| O | 2.9534729  | 0.8878025  | -2.9177228 |
| C | -1.0349449 | 2.0218563  | -0.8075131 |
| C | -2.3701645 | 1.5150656  | -0.3078670 |
| C | -2.4970589 | 0.4262918  | 0.5618958  |
| C | -3.7520878 | -0.0356490 | 0.9411821  |
| C | -4.8957381 | 0.5924587  | 0.4372424  |
| C | -4.7868495 | 1.6786015  | -0.4393010 |
| C | -3.5256322 | 2.1335756  | -0.8013606 |
| O | 1.2362073  | -0.3428303 | -2.0921643 |
| C | -0.1772474 | -0.2236046 | -1.9434257 |
| S | 0.1062116  | 2.2291418  | 0.6320704  |
| C | 1.1595481  | 0.7730605  | 0.8067238  |
| C | 1.3152929  | 3.4514033  | 0.0799578  |

|   |            |            |            |
|---|------------|------------|------------|
| C | -6.1968326 | 0.1180759  | 0.8271101  |
| N | -7.2440694 | -0.2638582 | 1.1412044  |
| H | 0.8681137  | 2.8279464  | -3.0141652 |
| H | -1.4218412 | 1.3636657  | -2.7272950 |
| H | -1.1574695 | 3.0720934  | -1.0981439 |
| H | -1.6219240 | -0.0802972 | 0.9568289  |
| H | -3.8459984 | -0.8766488 | 1.6198799  |
| H | -5.6797468 | 2.1617212  | -0.8218373 |
| H | -3.4339793 | 2.9816901  | -1.4740170 |
| H | -0.6644075 | -0.7915433 | -2.7437680 |
| H | -0.4650292 | -0.6685051 | -0.9852006 |
| H | 1.9010676  | 1.0531626  | 1.5590488  |
| H | 0.5590507  | -0.0541354 | 1.1860759  |
| H | 1.6383422  | 0.5192914  | -0.1388937 |
| H | 1.9055195  | 3.7130474  | 0.9609156  |
| H | 0.7646444  | 4.3252663  | -0.2720949 |
| H | 1.9317553  | 3.0272488  | -0.7116795 |

4a\_tr\_sy\_2\_r.log

E = -1145.534954  
H = -1145.253141  
G = -1145.317944

NImag=0

|   |            |            |            |
|---|------------|------------|------------|
| C | 1.6853756  | -1.6148609 | 0.3021810  |
| C | 1.4297394  | -0.9202090 | -1.0071353 |
| C | 0.8551540  | -2.7260874 | 0.4126177  |
| O | 0.5954549  | -3.5237551 | 1.3293552  |
| C | 0.4493355  | 0.2562841  | -0.7705145 |
| C | 0.9553172  | 1.2492331  | 0.2519688  |
| C | 2.2196264  | 1.8342658  | 0.1085406  |
| C | 2.6893895  | 2.7361751  | 1.0539258  |
| C | 1.8860248  | 3.0535778  | 2.1567571  |
| C | 0.6209993  | 2.4770254  | 2.3119173  |
| C | 0.1625702  | 1.5788692  | 1.3539055  |
| O | 0.1966542  | -2.9363779 | -0.8253423 |
| C | 0.8141015  | -2.0914752 | -1.7896956 |
| S | 0.0102764  | 1.2936903  | -2.2861017 |
| C | 1.1921655  | 0.8377261  | -3.5704784 |
| C | -1.5219748 | 0.5683381  | -2.9019138 |
| C | 2.3706984  | 3.9835512  | 3.1420738  |
| N | 2.7617287  | 4.7323427  | 3.9343098  |
| H | 2.1963390  | -1.1723133 | 1.1468787  |
| H | 2.3240522  | -0.5459737 | -1.5168126 |
| H | -0.5282826 | -0.1335750 | -0.4645622 |
| H | 2.8516322  | 1.5843024  | -0.7400125 |
| H | 3.6690199  | 3.1899839  | 0.9464525  |
| H | 0.0094160  | 2.7291416  | 3.1718597  |
| H | -0.8167072 | 1.1229746  | 1.4676923  |
| H | 1.6196091  | -2.6416073 | -2.2946792 |
| H | 0.0612032  | -1.8175014 | -2.5317359 |
| H | 0.9000005  | 1.4001112  | -4.4598725 |
| H | 2.1821554  | 1.1597536  | -3.2434643 |
| H | 1.1664472  | -0.2339300 | -3.7691921 |
| H | -1.7887486 | 1.1219218  | -3.8045254 |
| H | -2.2821008 | 0.7238329  | -2.1345014 |
| H | -1.3974711 | -0.4914806 | -3.1218399 |

4a\_tr\_sy\_2\_ts1.log

E = -1145.509975  
H = -1145.230949

G = -1145.295422  
NImag=1

|   |            |            |            |
|---|------------|------------|------------|
| C | -2.5697632 | -1.1332480 | 1.1961349  |
| C | -1.1961029 | -1.1055904 | 1.0072672  |
| C | -3.1964825 | -1.6229281 | 0.0050270  |
| O | -4.3753418 | -1.7353686 | -0.3067680 |
| C | -0.3482444 | 0.8644432  | 0.7390021  |
| C | 1.0394772  | 0.6050857  | 0.4438448  |
| C | 1.5782230  | 0.6338162  | -0.8657119 |
| C | 2.8895300  | 0.2638320  | -1.1122106 |
| C | 3.7078514  | -0.1711514 | -0.0573943 |
| C | 3.1910952  | -0.2256792 | 1.2488070  |
| C | 1.8846846  | 0.1574646  | 1.4904687  |
| O | -2.2213638 | -2.0023320 | -0.8945443 |
| C | -0.9386316 | -1.8562013 | -0.2774066 |
| S | -1.1632094 | 2.0021515  | -0.3474822 |
| C | -2.1574866 | 1.0676535  | -1.5478739 |
| C | -2.4730451 | 2.6262599  | 0.7213117  |
| C | 5.0611444  | -0.5606580 | -0.3113762 |
| N | 6.1589372  | -0.8768977 | -0.5162138 |
| H | -3.1290970 | -0.7886318 | 2.0546548  |
| H | -0.4651563 | -1.1780264 | 1.8063912  |
| H | -0.5805455 | 1.1500397  | 1.7623538  |
| H | 0.9654030  | 0.9475495  | -1.7081096 |
| H | 3.2857444  | 0.3016390  | -2.1222013 |
| H | 3.8231719  | -0.5599193 | 2.0658513  |
| H | 1.4984721  | 0.1296943  | 2.5058348  |
| H | -0.5388012 | -2.8531409 | -0.0556997 |
| H | -0.2608907 | -1.3578417 | -0.9768676 |
| H | -2.5243944 | 1.8032065  | -2.2670205 |
| H | -1.5007209 | 0.3564774  | -2.0503795 |
| H | -2.9900770 | 0.5687762  | -1.0549960 |
| H | -3.1536527 | 3.2116705  | 0.1009355  |
| H | -2.0096873 | 3.2611271  | 1.4774474  |
| H | -2.9889192 | 1.7798239  | 1.1784369  |

4a\_tr\_sy\_2\_ts2.log  
E = -1145.526993  
H = -1145.247315  
G = -1145.313160  
NImag=1

|   |            |            |            |
|---|------------|------------|------------|
| C | 1.2743694  | 1.8782619  | -0.7506740 |
| C | 1.5756291  | 0.4268432  | -1.0005484 |
| C | 2.3080703  | 2.4338111  | 0.0275612  |
| O | 2.4525129  | 3.5350138  | 0.5634290  |
| C | 0.7453469  | -0.0700651 | 0.1377170  |
| C | -0.7376406 | 0.0828923  | 0.0853080  |
| C | -1.4289570 | 0.0429524  | -1.1329739 |
| C | -2.8133484 | 0.1478864  | -1.1578547 |
| C | -3.5153648 | 0.2883067  | 0.0461723  |
| C | -2.8373874 | 0.3184501  | 1.2715128  |
| C | -1.4533614 | 0.2116860  | 1.2820780  |
| O | 3.3285665  | 1.4869904  | 0.1784779  |
| C | 3.0800542  | 0.4081411  | -0.7270788 |
| S | 0.8109793  | -2.2948614 | 0.3200923  |
| C | 1.5634640  | -2.7970859 | -1.2426457 |
| C | 2.1654661  | -2.5880817 | 1.4779076  |
| C | -4.9488770 | 0.4018873  | 0.0225801  |
| N | -6.1034422 | 0.4933137  | 0.0034823  |
| H | 0.3548922  | 2.3898462  | -0.9910798 |
| H | 1.3171646  | 0.0063396  | -1.9737370 |

|   |            |            |            |
|---|------------|------------|------------|
| H | 1.1820003  | 0.1139625  | 1.1205620  |
| H | -0.8898386 | -0.0647444 | -2.0693994 |
| H | -3.3515604 | 0.1219356  | -2.0994918 |
| H | -3.3917657 | 0.4273177  | 2.1977098  |
| H | -0.9168347 | 0.2363034  | 2.2266286  |
| H | 3.6193650  | 0.5917253  | -1.6643083 |
| H | 3.4556237  | -0.5091875 | -0.2709787 |
| H | 1.7365950  | -3.8749661 | -1.2092664 |
| H | 0.8525082  | -2.5687519 | -2.0391057 |
| H | 2.5049537  | -2.2713362 | -1.4115001 |
| H | 2.3578237  | -3.6621807 | 1.5228522  |
| H | 1.8376650  | -2.2358698 | 2.4578514  |
| H | 3.0677732  | -2.0574700 | 1.1710332  |

4a\_tr\_sy\_3.log

E = -1145.538633

H = -1145.256944

G = -1145.322024

NImag=0

|   |            |            |            |
|---|------------|------------|------------|
| C | 0.5995269  | 1.7385398  | -3.1206236 |
| C | -0.4662164 | 0.9906189  | -2.3740228 |
| C | 1.8530248  | 1.2982071  | -2.7146055 |
| O | 3.0189894  | 1.6807210  | -2.9049128 |
| C | -1.0328323 | 1.8089821  | -1.1768375 |
| C | -2.3059192 | 1.3368329  | -0.5199622 |
| C | -2.5929652 | -0.0200125 | -0.3196717 |
| C | -3.7963067 | -0.4128718 | 0.2548546  |
| C | -4.7287260 | 0.5592183  | 0.6322791  |
| C | -4.4664174 | 1.9185656  | 0.4291113  |
| C | -3.2604646 | 2.2943979  | -0.1484072 |
| O | 1.6841094  | 0.1521723  | -1.8805413 |
| C | 0.3326681  | -0.2758255 | -2.0200550 |
| S | 0.3411908  | 2.1585516  | 0.0332080  |
| C | -0.4265676 | 3.3560025  | 1.1421409  |
| C | 0.4414608  | 0.7406927  | 1.1424615  |
| C | -5.9755892 | 0.1551806  | 1.2267408  |
| N | -6.9784949 | -0.1698333 | 1.7057706  |
| H | 0.4421111  | 2.6820980  | -3.6281846 |
| H | -1.3526081 | 0.7192921  | -2.9605228 |
| H | -1.1992634 | 2.8256974  | -1.5524564 |
| H | -1.8876294 | -0.7877820 | -0.6148610 |
| H | -4.0152076 | -1.4644749 | 0.4068039  |
| H | -5.2006668 | 2.6647062  | 0.7136578  |
| H | -3.0589588 | 3.3476837  | -0.3228270 |
| H | 0.2572150  | -0.9843186 | -2.8549549 |
| H | 0.0412977  | -0.7891938 | -1.1019485 |
| H | 0.3364923  | 3.6390460  | 1.8698768  |
| H | -0.7110686 | 4.2268892  | 0.5489348  |
| H | -1.2902963 | 2.9166806  | 1.6441065  |
| H | 0.9789522  | 1.0925251  | 2.0263785  |
| H | 1.0225563  | -0.0365428 | 0.6479676  |
| H | -0.5570964 | 0.3965537  | 1.4194021  |

4a\_tr\_sy\_3\_r.log

E = -1145.540568

H = -1145.258911

G = -1145.323644

NImag=0

|   |           |            |            |
|---|-----------|------------|------------|
| C | 1.6576507 | -1.7083165 | 0.6002003  |
| C | 1.4732194 | -1.1240695 | -0.7723752 |

|   |            |            |            |
|---|------------|------------|------------|
| C | 0.8253873  | -2.8120460 | 0.7551955  |
| O | 0.5165993  | -3.5320534 | 1.7204310  |
| C | 0.4777944  | 0.0598261  | -0.7259352 |
| C | 0.8242844  | 1.1698987  | 0.2293362  |
| C | 2.1533372  | 1.5726758  | 0.4156696  |
| C | 2.4616111  | 2.5975131  | 1.3005079  |
| C | 1.4293894  | 3.2256197  | 2.0091811  |
| C | 0.0982230  | 2.8309468  | 1.8392097  |
| C | -0.1945912 | 1.8044337  | 0.9483435  |
| O | 0.2319718  | -3.1269927 | -0.4927224 |
| C | 0.8785011  | -2.3474257 | -1.4930270 |
| S | 0.2422971  | 0.7171394  | -2.4659968 |
| C | -1.0394641 | 1.9703660  | -2.2919036 |
| C | 1.6901056  | 1.7415026  | -2.7809424 |
| C | 1.7432919  | 4.2858965  | 2.9303610  |
| N | 1.9954144  | 5.1398909  | 3.6707653  |
| H | 2.1215563  | -1.1973621 | 1.4331829  |
| H | 2.3965473  | -0.8039156 | -1.2717106 |
| H | -0.5257203 | -0.3246269 | -0.5033676 |
| H | 2.9558456  | 1.0797469  | -0.1251299 |
| H | 3.4902295  | 2.9091845  | 1.4482624  |
| H | -0.6913870 | 3.3188763  | 2.4007342  |
| H | -1.2247972 | 1.4847161  | 0.8161745  |
| H | 1.6902175  | -2.9337856 | -1.9423020 |
| H | 0.1451265  | -2.1087143 | -2.2701898 |
| H | -1.1998219 | 2.3969208  | -3.2841861 |
| H | -1.9480594 | 1.4713189  | -1.9503857 |
| H | -0.7187558 | 2.7408784  | -1.5886580 |
| H | 1.5836772  | 2.1200598  | -3.7996161 |
| H | 2.5760431  | 1.1074895  | -2.7155282 |
| H | 1.7335382  | 2.5644366  | -2.0661050 |

4a\_tr\_sy\_3\_ts1.log

E = -1145.510896

H = -1145.231613

G = -1145.296047

NImag=1

|   |            |            |            |
|---|------------|------------|------------|
| C | 2.8660570  | -1.0367140 | -1.0739290 |
| C | 1.4832220  | -1.1837770 | -1.1111340 |
| C | 3.3464650  | -1.4202880 | 0.2188490  |
| O | 4.4638500  | -1.3927080 | 0.7176600  |
| C | 0.4161260  | 0.6893050  | -1.0389780 |
| C | -0.9351110 | 0.4354150  | -0.5999340 |
| C | -1.4050560 | 0.5859250  | 0.7262170  |
| C | -2.6894060 | 0.2060810  | 1.0819440  |
| C | -3.5513450 | -0.3508540 | 0.1256090  |
| C | -3.1059740 | -0.5199920 | -1.1968070 |
| C | -1.8269850 | -0.1298380 | -1.5471290 |
| O | 2.2866380  | -1.9093110 | 0.9651120  |
| C | 1.1142960  | -1.9377200 | 0.1439940  |
| S | 1.5029580  | 1.8268890  | -0.2714320 |
| C | 0.6054640  | 3.3723980  | 0.0231530  |
| C | 1.8184260  | 1.2932480  | 1.4369140  |
| C | -4.8773190 | -0.7439480 | 0.4946480  |
| N | -5.9524040 | -1.0632130 | 0.7929070  |
| H | 3.5111080  | -0.6414050 | -1.8460080 |
| H | 0.9073990  | -1.3715040 | -2.0108210 |
| H | 0.5329360  | 0.8444580  | -2.1094640 |
| H | -0.7668210 | 1.0037590  | 1.4969740  |
| H | -3.0302660 | 0.3369380  | 2.1043130  |
| H | -3.7710220 | -0.9487510 | -1.9401640 |



|   |            |            |            |
|---|------------|------------|------------|
| H | -1.4944210 | -0.2540120 | -2.5741920 |
| H | 0.8799690  | -2.9802890 | -0.1016680 |
| H | 0.2766870  | -1.5144100 | 0.7068510  |
| H | 1.2735410  | 4.0374960  | 0.5749870  |
| H | 0.3723680  | 3.7992380  | -0.9533310 |
| H | -0.3057110 | 3.1796530  | 0.5912170  |
| H | 2.8535970  | 1.5529540  | 1.6644590  |
| H | 1.6795680  | 0.2148530  | 1.5097690  |
| H | 1.1435040  | 1.8139890  | 2.1169590  |

4a\_tr\_sy\_3\_ts2.log

E = -1145.530449  
H = -1145.250692  
G = -1145.315892

NImag=1

|   |            |            |            |
|---|------------|------------|------------|
| C | -1.8813559 | -1.6621210 | -0.5929147 |
| C | -1.8915390 | -0.1968930 | -0.9225085 |
| C | -2.9828589 | -1.9541881 | 0.2346033  |
| O | -3.3302016 | -2.9745489 | 0.8340729  |
| C | -0.9361664 | 0.1884150  | 0.1526447  |
| C | 0.4928993  | -0.1966584 | 0.0814411  |
| C | 1.1252123  | -0.4422621 | -1.1475769 |
| C | 2.4734692  | -0.7675969 | -1.1916976 |
| C | 3.2030323  | -0.8436560 | 0.0025312  |
| C | 2.5877405  | -0.6008163 | 1.2363905  |
| C | 1.2370304  | -0.2798358 | 1.2671058  |
| O | -3.7850170 | -0.8137150 | 0.3549916  |
| C | -3.3415170 | 0.1623309  | -0.5927378 |
| S | -0.8230945 | 2.4458352  | 0.0920898  |
| C | 0.2212463  | 2.8764883  | 1.4988045  |
| C | 0.3219663  | 2.7646065  | -1.2645939 |
| C | 4.6010096  | -1.1798124 | -0.0395662 |
| N | 5.7269947  | -1.4492575 | -0.0728389 |
| H | -1.0924216 | -2.3621647 | -0.8228337 |
| H | -1.5975584 | 0.1143687  | -1.9276665 |
| H | -1.3610044 | 0.1691276  | 1.1572671  |
| H | 0.5637472  | -0.3845879 | -2.0750862 |
| H | 2.9635943  | -0.9612851 | -2.1400299 |
| H | 3.1619271  | -0.6686529 | 2.1543097  |
| H | 0.7467464  | -0.0982792 | 2.2198325  |
| H | -3.9551653 | 0.0886169  | -1.4979156 |
| H | -3.4662881 | 1.1542398  | -0.1500554 |
| H | 0.3819284  | 3.9568574  | 1.4965890  |
| H | -0.3058790 | 2.5871801  | 2.4100869  |
| H | 1.1791702  | 2.3556764  | 1.4307538  |
| H | 0.4851441  | 3.8423527  | -1.3356406 |
| H | -0.1376971 | 2.4043337  | -2.1871439 |
| H | 1.2698657  | 2.2515831  | -1.0861778 |

4b.log

E = -344.460189  
H = -344.349096  
G = -344.386215

NImag=0

|   |            |           |           |
|---|------------|-----------|-----------|
| C | 0.6462874  | 1.0590747 | 0.0498570 |
| C | 0.9552818  | 0.9434237 | 1.5468184 |
| O | -0.2057034 | 0.3114462 | 2.1439290 |
| C | -1.2802669 | 0.4209803 | 1.3417531 |
| C | -0.8547468 | 1.0114078 | 0.0364428 |
| O | -2.3830819 | 0.0678007 | 1.6891144 |

|   |            |           |            |
|---|------------|-----------|------------|
| C | -1.7338537 | 1.4003911 | -0.8837965 |
| H | 1.0544233  | 1.9712586 | -0.3879344 |
| H | 1.0543521  | 0.1985018 | -0.4906680 |
| H | 1.8170212  | 0.3168741 | 1.7732515  |
| H | 1.0753121  | 1.9221934 | 2.0180365  |
| H | -2.7997811 | 1.2810353 | -0.7079463 |
| H | -1.4156441 | 1.8433133 | -1.8230572 |

4b\_sy\_1.log

E = -1184.836314  
H = -1184.524486  
G = -1184.591825

NImag=0

|   |           |            |            |
|---|-----------|------------|------------|
| C | 4.7599101 | 2.9463255  | 2.1040887  |
| C | 5.9981409 | 2.1030569  | 2.4623073  |
| C | 6.7220976 | 2.5569691  | 3.7034798  |
| C | 6.0472792 | 2.6905401  | 4.9240349  |
| C | 6.7232540 | 3.1211937  | 6.0582641  |
| C | 8.0862421 | 3.4307418  | 5.9677528  |
| C | 8.7719714 | 3.3065647  | 4.7547086  |
| C | 8.0840684 | 2.8644240  | 3.6300455  |
| C | 4.0144916 | 2.4562453  | 0.9028023  |
| C | 2.6757067 | 1.7632595  | 0.9097541  |
| C | 2.4658249 | 1.5848319  | -0.6005343 |
| O | 3.7718425 | 1.5549634  | -1.1879793 |
| C | 4.6457294 | 2.2249866  | -0.3059548 |
| O | 5.8116050 | 2.4472304  | -0.7064263 |
| S | 5.4626019 | 0.3313068  | 2.6880037  |
| C | 5.5002619 | -0.3753373 | 1.0211100  |
| C | 6.9638162 | -0.4229366 | 3.3523859  |
| C | 8.7902265 | 3.8817190  | 7.1390074  |
| N | 9.3571985 | 4.2443116  | 8.0814137  |
| H | 4.0943219 | 2.9965379  | 2.9738252  |
| H | 5.1633866 | 3.9616229  | 1.9697122  |
| H | 6.6792666 | 2.0683777  | 1.6051873  |
| H | 4.9894682 | 2.4525439  | 4.9993254  |
| H | 6.2051796 | 3.2207546  | 7.0062449  |
| H | 9.8278192 | 3.5493953  | 4.6981711  |
| H | 8.6082875 | 2.7572435  | 2.6848146  |
| H | 2.6796426 | 0.7822808  | 1.4252224  |
| H | 1.8524847 | 2.3394640  | 1.3495864  |
| H | 1.9188895 | 2.4452815  | -1.0104981 |
| H | 1.9426091 | 0.6656422  | -0.8759842 |
| H | 5.7432416 | -1.4333132 | 1.1417244  |
| H | 4.5133085 | -0.2620563 | 0.5743579  |
| H | 6.2572242 | 0.1418788  | 0.4268984  |
| H | 6.7958182 | -1.5013222 | 3.3615530  |
| H | 7.1107245 | -0.0633450 | 4.3711099  |
| H | 7.8134586 | -0.1672828 | 2.7151853  |

4b\_sy\_1\_r.log

E = -1184.835794  
H = -1184.524147  
G = -1184.593051

NImag=0

|   |            |            |            |
|---|------------|------------|------------|
| C | -0.7063998 | -1.5423874 | 0.0524829  |
| C | 0.0062094  | -0.2482876 | 0.5047654  |
| C | -0.4006576 | 1.0019887  | -0.2356875 |
| C | -1.7429879 | 1.2518906  | -0.5427382 |
| C | -2.1019729 | 2.4136151  | -1.2141592 |

|   |            |            |            |
|---|------------|------------|------------|
| C | -1.1083374 | 3.3300405  | -1.5832704 |
| C | 0.2378733  | 3.0883922  | -1.2897140 |
| C | 0.5820611  | 1.9218400  | -0.6157226 |
| C | -0.6240789 | -1.7104112 | -1.4292781 |
| C | 0.6508613  | -1.6286460 | -2.2278205 |
| C | 0.0923211  | -1.8626833 | -3.6367881 |
| O | -1.2674073 | -1.4212789 | -3.6077495 |
| C | -1.7045530 | -1.4607547 | -2.2649414 |
| O | -2.9217973 | -1.2698801 | -2.0563728 |
| S | -0.3447240 | 0.0359915  | 2.3047484  |
| C | 0.4774194  | -1.3691712 | 3.0825720  |
| C | 0.8021030  | 1.3601194  | 2.7311599  |
| C | -1.4769815 | 4.5350660  | -2.2782037 |
| N | -1.7727902 | 5.5060151  | -2.8360062 |
| H | -0.2436258 | -2.3720891 | 0.6038317  |
| H | -1.7640735 | -1.5063808 | 0.3441209  |
| H | 1.0945693  | -0.3696312 | 0.4555706  |
| H | -2.5079413 | 0.5225754  | -0.2946262 |
| H | -3.1400778 | 2.6103430  | -1.4610144 |
| H | 0.9983126  | 3.8030392  | -1.5863722 |
| H | 1.6249587  | 1.7215697  | -0.3846924 |
| H | 1.1469879  | -0.6409732 | -2.1582466 |
| H | 1.4102945  | -2.3816068 | -1.9799330 |
| H | 0.1058799  | -2.9356759 | -3.8754870 |
| H | 0.6169704  | -1.3166532 | -4.4250285 |
| H | 0.5537237  | -1.1400488 | 4.1475260  |
| H | -0.1454079 | -2.2520273 | 2.9389675  |
| H | 1.4668086  | -1.5019982 | 2.6396756  |
| H | 0.7895468  | 1.4546611  | 3.8188310  |
| H | 0.4372886  | 2.2822069  | 2.2767042  |
| H | 1.8017713  | 1.1068129  | 2.3724188  |

4b\_sy\_1\_ts1.log

E = -1184.805843

H = -1184.496735

G = -1184.565470

NImag=1

|   |            |            |            |
|---|------------|------------|------------|
| C | -0.9185124 | -1.1485601 | -0.1264955 |
| C | 0.0777014  | 0.6168249  | 0.6565115  |
| C | 1.4488715  | 0.2753506  | 0.3871018  |
| C | 2.1096918  | 0.5580080  | -0.8345377 |
| C | 3.3946756  | 0.1044495  | -1.0782346 |
| C | 4.0692650  | -0.6588283 | -0.1118264 |
| C | 3.4290047  | -0.9648740 | 1.1024519  |
| C | 2.1472592  | -0.5068119 | 1.3421875  |
| C | -2.2745460 | -1.1074173 | -0.3759574 |
| C | -2.9978498 | -0.6654873 | -1.6229238 |
| C | -4.4099716 | -1.1895441 | -1.3340210 |
| O | -4.5154452 | -1.2791549 | 0.1023904  |
| C | -3.2586341 | -1.3569359 | 0.6473107  |
| O | -3.1255069 | -1.5917408 | 1.8414339  |
| S | -0.6246945 | 1.9389241  | -0.2611528 |
| C | -2.1915566 | 2.1569480  | 0.6010930  |
| C | 0.2152919  | 3.4610956  | 0.2590882  |
| C | 5.3992892  | -1.1218792 | -0.3614003 |
| N | 6.4785677  | -1.4985713 | -0.5636416 |
| H | -0.2324115 | -1.1569687 | -0.9718933 |
| H | -0.5747406 | -1.6802090 | 0.7585289  |
| H | -0.2272031 | 0.6516748  | 1.7016261  |
| H | 1.6162697  | 1.1434522  | -1.6064586 |
| H | 3.8850982  | 0.3392409  | -2.0180336 |

|   |            |            |            |
|---|------------|------------|------------|
| H | 3.9468319  | -1.5567814 | 1.8509872  |
| H | 1.6616264  | -0.7432239 | 2.2850861  |
| H | -3.0137902 | 0.4287404  | -1.7402362 |
| H | -2.5922364 | -1.0908115 | -2.5454545 |
| H | -4.5528363 | -2.1948108 | -1.7451616 |
| H | -5.2097048 | -0.5367138 | -1.6856828 |
| H | -2.7129741 | 2.9916233  | 0.1305704  |
| H | -2.7685908 | 1.2394489  | 0.4913674  |
| H | -1.9887415 | 2.3634510  | 1.6538965  |
| H | -0.3157581 | 4.3069737  | -0.1839740 |
| H | 1.2364910  | 3.4200635  | -0.1242302 |
| H | 0.2105215  | 3.5154311  | 1.3492784  |

4b\_sy\_2.log

E = -1184.837004  
H = -1184.525286  
G = -1184.591934

NImag=0

|   |           |            |            |
|---|-----------|------------|------------|
| C | 4.7520192 | 2.3862870  | 2.3329095  |
| C | 6.2872059 | 2.2457204  | 2.4327012  |
| C | 6.8820811 | 2.7328921  | 3.7365254  |
| C | 6.2813149 | 2.4272563  | 4.9635724  |
| C | 6.8373256 | 2.8847852  | 6.1528206  |
| C | 8.0020169 | 3.6596751  | 6.1125446  |
| C | 8.6121132 | 3.9753497  | 4.8929271  |
| C | 8.0475687 | 3.5067795  | 3.7132434  |
| C | 4.1766245 | 2.1293469  | 0.9844263  |
| C | 4.5971044 | 2.8450562  | -0.2721951 |
| C | 3.5901150 | 2.2544213  | -1.2676616 |
| O | 3.1974278 | 0.9848386  | -0.7355409 |
| C | 3.4304459 | 1.0128270  | 0.6557463  |
| O | 2.9770931 | 0.0527385  | 1.3259485  |
| S | 6.9348834 | 0.5231873  | 2.1854033  |
| C | 5.6705554 | -0.5612928 | 2.8711174  |
| C | 6.7977862 | 0.2053971  | 0.4149102  |
| C | 8.5778956 | 4.1406875  | 7.3405793  |
| N | 9.0416399 | 4.5277031  | 8.3286349  |
| H | 4.2703180 | 1.7359720  | 3.0720854  |
| H | 4.5769730 | 3.4202559  | 2.6719388  |
| H | 6.7650180 | 2.7802725  | 1.6030196  |
| H | 5.3732358 | 1.8330973  | 5.0007920  |
| H | 6.3736438 | 2.6492022  | 7.1048820  |
| H | 9.5130662 | 4.5794348  | 4.8738525  |
| H | 8.5139008 | 3.7471188  | 2.7618937  |
| H | 4.5106428 | 3.9384680  | -0.2303850 |
| H | 5.6361264 | 2.6213021  | -0.5776877 |
| H | 3.9904140 | 2.0981665  | -2.2724966 |
| H | 2.6992021 | 2.8941601  | -1.3334184 |
| H | 6.0407644 | -1.5787218 | 2.7247530  |
| H | 5.6060282 | -0.3520598 | 3.9413630  |
| H | 4.7098592 | -0.4056511 | 2.3643586  |
| H | 7.2176934 | -0.7891214 | 0.2500315  |
| H | 7.4094936 | 0.9513481  | -0.0958381 |
| H | 5.7560036 | 0.2575998  | 0.0999429  |

4b\_sy\_2\_r.log

E = -1184.833907  
H = -1184.521730  
G = -1184.589561

NImag=0

|   |            |            |            |
|---|------------|------------|------------|
| C | -0.8065803 | -0.7085609 | -0.9089324 |
| C | -0.0481345 | -0.1825090 | 0.3187575  |
| C | 1.0077045  | -1.1249511 | 0.8456723  |
| C | 1.9902702  | -1.6578606 | 0.0026071  |
| C | 2.9356877  | -2.5481393 | 0.4964839  |
| C | 2.8896992  | -2.9183931 | 1.8462668  |
| C | 1.9085382  | -2.4001879 | 2.6988911  |
| C | 0.9768784  | -1.5013661 | 2.1918931  |
| C | -1.5877409 | -1.9212785 | -0.4900435 |
| C | -1.1167235 | -3.3531726 | -0.5631956 |
| C | -2.3414672 | -4.0534658 | 0.0378743  |
| O | -2.9403488 | -3.1082411 | 0.9311479  |
| C | -2.5535676 | -1.8238047 | 0.5037760  |
| O | -3.0842726 | -0.8402172 | 1.0655505  |
| S | 0.7374550  | 1.5042765  | 0.1081455  |
| C | 1.2914881  | 1.5546820  | -1.6070227 |
| C | -0.7083483 | 2.5791039  | 0.0327818  |
| C | 3.8617178  | -3.8461593 | 2.3616067  |
| N | 4.6449795  | -4.5917615 | 2.7760766  |
| H | -1.4673131 | 0.0847770  | -1.2797164 |
| H | -0.1057071 | -0.9479944 | -1.7161295 |
| H | -0.7809104 | 0.0278383  | 1.1073238  |
| H | 2.0132145  | -1.3974918 | -1.0517226 |
| H | 3.6981210  | -2.9624067 | -0.1548753 |
| H | 1.8788735  | -2.7000251 | 3.7412058  |
| H | 0.2089389  | -1.0959774 | 2.8450111  |
| H | -0.9111195 | -3.7287425 | -1.5733345 |
| H | -0.2156608 | -3.5557117 | 0.0453500  |
| H | -2.1101462 | -4.9612432 | 0.6005282  |
| H | -3.0671399 | -4.2946467 | -0.7518899 |
| H | 1.6510575  | 2.5702706  | -1.7853078 |
| H | 2.1174833  | 0.8513209  | -1.7214306 |
| H | 0.4649535  | 1.3150368  | -2.2767489 |
| H | -0.3471236 | 3.5896546  | -0.1674211 |
| H | -1.1937605 | 2.5443655  | 1.0096018  |
| H | -1.3843973 | 2.2463714  | -0.7556515 |

4b\_sy\_2\_ts1.log

E = -1184.804409  
H = -1184.495594  
G = -1184.564051

NImag=1

|   |            |            |            |
|---|------------|------------|------------|
| C | -0.9095304 | -0.9997811 | -0.6042986 |
| C | 0.1313643  | 0.3972825  | 0.7699757  |
| C | 1.5238240  | 0.1743565  | 0.5038493  |
| C | 2.3167338  | 1.0242701  | -0.3099026 |
| C | 3.6316079  | 0.7150145  | -0.6079704 |
| C | 4.2069565  | -0.4714314 | -0.1223520 |
| C | 3.4362782  | -1.3407458 | 0.6712224  |
| C | 2.1266012  | -1.0225642 | 0.9750426  |
| C | -2.2449284 | -1.1794444 | -0.3342201 |
| C | -2.8460308 | -1.8824168 | 0.8522784  |
| C | -4.3230154 | -1.9516754 | 0.4482549  |
| O | -4.5184220 | -0.9101084 | -0.5324175 |
| C | -3.3146487 | -0.5431211 | -1.0657250 |
| O | -3.2824019 | 0.2155620  | -2.0282338 |
| S | -0.4355410 | 2.0650964  | 0.6762812  |
| C | -1.0902600 | 2.3264779  | -0.9937458 |
| C | -1.9704028 | 1.9550741  | 1.6134428  |
| C | 5.5638597  | -0.7934623 | -0.4354295 |
| N | 6.6664395  | -1.0550258 | -0.6890576 |

|   |            |            |            |
|---|------------|------------|------------|
| H | -0.6177900 | -0.4979591 | -1.5255731 |
| H | -0.1896321 | -1.7147205 | -0.2135100 |
| H | -0.2962136 | -0.0818535 | 1.6474008  |
| H | 1.9033319  | 1.9452344  | -0.7133127 |
| H | 4.2215787  | 1.3875829  | -1.2231487 |
| H | 3.8773542  | -2.2578686 | 1.0497861  |
| H | 1.5445909  | -1.6943048 | 1.6004860  |
| H | -2.4315409 | -2.8771346 | 1.0392550  |
| H | -2.7185519 | -1.2881197 | 1.7701039  |
| H | -5.0194909 | -1.7705202 | 1.2674921  |
| H | -4.5637561 | -2.9072185 | -0.0289271 |
| H | -1.4626837 | 3.3533189  | -1.0222556 |
| H | -0.2573021 | 2.2207648  | -1.6919525 |
| H | -1.8804599 | 1.6082906  | -1.2211411 |
| H | -2.5074132 | 2.8954565  | 1.4791699  |
| H | -1.7077070 | 1.8171305  | 2.6632823  |
| H | -2.5568900 | 1.1125797  | 1.2420123  |

4b\_sy\_3.log

E = -1184.841202  
H = -1184.529434  
G = -1184.596529

NImag=0

|   |           |            |            |
|---|-----------|------------|------------|
| C | 4.6279314 | 2.7519151  | 2.1884988  |
| C | 6.1511342 | 2.5491066  | 2.3162305  |
| C | 6.7569045 | 2.8234391  | 3.6665864  |
| C | 6.1223337 | 2.4276810  | 4.8512279  |
| C | 6.7032663 | 2.6930693  | 6.0860306  |
| C | 7.9289019 | 3.3660665  | 6.1386320  |
| C | 8.5722132 | 3.7770407  | 4.9653100  |
| C | 7.9804217 | 3.5019820  | 3.7390633  |
| C | 4.0892162 | 2.3274782  | 0.8647098  |
| C | 4.5936575 | 2.8130978  | -0.4684147 |
| C | 3.5977164 | 2.1116828  | -1.4017666 |
| O | 3.1208751 | 0.9626849  | -0.6935378 |
| C | 3.3089269 | 1.1967596  | 0.6820744  |
| O | 2.7887198 | 0.3787076  | 1.4772233  |
| S | 6.5177191 | 0.8394353  | 1.6770874  |
| C | 8.2116914 | 0.5593315  | 2.2318552  |
| C | 5.6124839 | -0.2654814 | 2.7705674  |
| C | 8.5313089 | 3.6445725  | 7.4157400  |
| N | 9.0165229 | 3.8679830  | 8.4431858  |
| H | 4.1113608 | 2.1930497  | 2.9768835  |
| H | 4.4753842 | 3.8206610  | 2.4044506  |
| H | 6.6630138 | 3.1601334  | 1.5634036  |
| H | 5.1661928 | 1.9152585  | 4.8232683  |
| H | 6.2115402 | 2.3866579  | 7.0031848  |
| H | 9.5188354 | 4.3042802  | 5.0182479  |
| H | 8.4728826 | 3.8183364  | 2.8237038  |
| H | 4.5590811 | 3.9013071  | -0.6069840 |
| H | 5.6319582 | 2.4984156  | -0.6868095 |
| H | 4.0287230 | 1.7783562  | -2.3489370 |
| H | 2.7432414 | 2.7701668  | -1.6101483 |
| H | 8.4959155 | -0.4328717 | 1.8756466  |
| H | 8.8485975 | 1.3133797  | 1.7647179  |
| H | 8.2735170 | 0.6100539  | 3.3204758  |
| H | 5.9001637 | -1.2787072 | 2.4797398  |
| H | 4.5434853 | -0.1120132 | 2.5812964  |
| H | 5.8909620 | -0.0790163 | 3.8092561  |

4b\_sy\_3\_r.log

E = -1184.835577  
H = -1184.523991  
G = -1184.593157

NImag=0

|   |            |            |            |
|---|------------|------------|------------|
| C | -1.3326106 | -1.2021818 | 0.0636071  |
| C | -0.3741892 | -0.1370918 | 0.6203433  |
| C | -0.4550824 | 1.2213747  | -0.0222322 |
| C | -1.6862234 | 1.8006456  | -0.3557286 |
| C | -1.7386950 | 3.0582439  | -0.9439370 |
| C | -0.5461230 | 3.7429662  | -1.2077984 |
| C | 0.6927066  | 3.1746559  | -0.8905139 |
| C | 0.7277043  | 1.9180488  | -0.2977047 |
| C | -1.0091558 | -1.4486262 | -1.3802115 |
| C | -1.7371210 | -0.8761548 | -2.5701115 |
| C | -0.9326110 | -1.5299626 | -3.7005341 |
| O | 0.3798970  | -1.7567354 | -3.1761780 |
| C | 0.2653136  | -1.8297493 | -1.7732978 |
| O | 1.2776411  | -2.1823374 | -1.1267435 |
| S | -0.5724211 | -0.0547507 | 2.4771559  |
| C | 0.5763246  | 1.2351677  | 2.9886779  |
| C | -2.1520267 | 0.7697986  | 2.7357350  |
| C | -0.5958349 | 5.0452654  | -1.8182072 |
| N | -0.6362102 | 6.0940443  | -2.3077290 |
| H | -1.2079405 | -2.1069422 | 0.6755432  |
| H | -2.3749498 | -0.8844616 | 0.1802431  |
| H | 0.6458011  | -0.5317539 | 0.5330375  |
| H | -2.6134471 | 1.2674992  | -0.1673912 |
| H | -2.6918473 | 3.5072581  | -1.2025999 |
| H | 1.6104003  | 3.7108114  | -1.1081005 |
| H | 1.6850581  | 1.4664109  | -0.0518109 |
| H | -2.7984730 | -1.1446653 | -2.6438276 |
| H | -1.6800009 | 0.2261273  | -2.6359185 |
| H | -0.8435354 | -0.9181071 | -4.6016208 |
| H | -1.3735327 | -2.5009384 | -3.9677080 |
| H | 0.4871689  | 1.3297242  | 4.0727944  |
| H | 1.5840020  | 0.9068636  | 2.7268234  |
| H | 0.3252659  | 2.1765276  | 2.4966242  |
| H | -2.2948704 | 0.8386397  | 3.8160837  |
| H | -2.9354702 | 0.1471650  | 2.3001602  |
| H | -2.1358406 | 1.7643364  | 2.2872226  |

4b\_sy\_3\_ts1.log

E = -1184.804612  
H = -1184.495242  
G = -1184.565061

NImag=1

|   |            |            |            |
|---|------------|------------|------------|
| C | 1.0668272  | -1.2178762 | 0.3416391  |
| C | -0.0336094 | 0.2308932  | -0.8455576 |
| C | -1.4183652 | 0.0406445  | -0.4952999 |
| C | -2.1124076 | 0.7513804  | 0.5135292  |
| C | -3.4173840 | 0.4334383  | 0.8515921  |
| C | -4.0790123 | -0.6221359 | 0.2055058  |
| C | -3.4069329 | -1.3566921 | -0.7869472 |
| C | -2.1084101 | -1.0274488 | -1.1265782 |
| C | 2.4316763  | -1.2087275 | 0.1508448  |
| C | 3.1938968  | -1.6907054 | -1.0544322 |
| C | 4.6386904  | -1.6020027 | -0.5486482 |
| O | 4.6262100  | -0.6507551 | 0.5364507  |
| C | 3.3505338  | -0.5093194 | 1.0125258  |
| O | 3.1546118  | 0.1349374  | 2.0377275  |

|   |            |            |            |
|---|------------|------------|------------|
| S | 0.8426089  | 1.7307303  | -0.6914463 |
| C | -0.1950620 | 3.0864497  | -1.2990956 |
| C | 0.9866417  | 2.2010333  | 1.0505383  |
| C | -5.4259845 | -0.9503134 | 0.5579246  |
| N | -6.5190558 | -1.2167479 | 0.8435193  |
| H | 0.6717704  | -0.8832176 | 1.3000166  |
| H | 0.4618261  | -1.9631511 | -0.1696186 |
| H | 0.2771135  | -0.2114579 | -1.7893676 |
| H | -1.6349789 | 1.5643215  | 1.0466414  |
| H | -3.9301364 | 0.9994464  | 1.6231876  |
| H | -3.9127697 | -2.1757165 | -1.2889495 |
| H | -1.6017283 | -1.5945646 | -1.9027709 |
| H | 2.9402654  | -2.7079014 | -1.3669618 |
| H | 3.0410515  | -1.0268841 | -1.9181919 |
| H | 5.3516571  | -1.2468154 | -1.2936773 |
| H | 4.9812348  | -2.5615058 | -0.1470381 |
| H | 0.3434990  | 4.0188713  | -1.1145130 |
| H | -0.3305206 | 2.9346179  | -2.3707929 |
| H | -1.1553718 | 3.0865967  | -0.7813341 |
| H | 1.7688214  | 2.9626311  | 1.0873002  |
| H | 1.3128403  | 1.3255771  | 1.6139099  |
| H | 0.0514990  | 2.6128846  | 1.4274891  |

4b\_sy\_4\_tsl.log

E = -1184.802892

H = -1184.493360

G = -1184.561105

NImag=1

|   |            |            |            |
|---|------------|------------|------------|
| C | 1.3825244  | -0.0834384 | -1.5957826 |
| C | -0.0144497 | 1.3146888  | -0.7853563 |
| C | -1.2367234 | 0.6182013  | -0.4403859 |
| C | -1.5912150 | 0.1847650  | 0.8585253  |
| C | -2.7409768 | -0.5549217 | 1.0816327  |
| C | -3.5791415 | -0.8987899 | 0.0100753  |
| C | -3.2475499 | -0.4841806 | -1.2909120 |
| C | -2.1023891 | 0.2606157  | -1.5045190 |
| C | 2.0741937  | -0.9160286 | -0.7363483 |
| C | 1.6177158  | -2.1870692 | -0.0686802 |
| C | 2.9419447  | -2.6920011 | 0.5167413  |
| O | 3.7719983  | -1.5233065 | 0.6855722  |
| C | 3.3235912  | -0.5256241 | -0.1424782 |
| O | 3.9694803  | 0.5113389  | -0.2508547 |
| S | 0.8784693  | 2.2951441  | 0.3548867  |
| C | -0.2837061 | 3.3652827  | 1.2492095  |
| C | 1.4474379  | 1.2215536  | 1.7120647  |
| C | -4.7659699 | -1.6646096 | 0.2420281  |
| N | -5.7283212 | -2.2854108 | 0.4297852  |
| H | 0.5633716  | -0.4921901 | -2.1839248 |
| H | 1.9506433  | 0.7079523  | -2.0803455 |
| H | -0.0467918 | 1.8674679  | -1.7214567 |
| H | -0.9668619 | 0.4214235  | 1.7126630  |
| H | -2.9951906 | -0.8714341 | 2.0884889  |
| H | -3.8947261 | -0.7441021 | -2.1228882 |
| H | -1.8589576 | 0.5850849  | -2.5127154 |
| H | 0.8906761  | -1.9969445 | 0.7348563  |
| H | 1.1741105  | -2.9183257 | -0.7510786 |
| H | 3.4514535  | -3.3696949 | -0.1771653 |
| H | 2.8462702  | -3.1745071 | 1.4901802  |
| H | 0.2882580  | 3.8989698  | 2.0121705  |
| H | -0.6900739 | 4.0703987  | 0.5225202  |
| H | -1.0786762 | 2.7731770  | 1.7039624  |



|   |           |           |           |
|---|-----------|-----------|-----------|
| H | 2.5034819 | 1.4361575 | 1.8760066 |
| H | 1.3156782 | 0.1807664 | 1.4190377 |
| H | 0.8642380 | 1.4437672 | 2.6070137 |

4b\_sy\_5.log

E = -1184.838755  
H = -1184.527252  
G = -1184.595005

NImag=0

|   |           |            |            |
|---|-----------|------------|------------|
| C | 6.5271303 | 2.0087279  | 0.8103903  |
| C | 7.1201518 | 1.2809705  | 2.0450109  |
| C | 7.1482554 | 2.1320893  | 3.2901915  |
| C | 5.9947086 | 2.4072984  | 4.0369559  |
| C | 6.0543450 | 3.2528334  | 5.1381160  |
| C | 7.2779871 | 3.8314837  | 5.4959549  |
| C | 8.4387359 | 3.5620432  | 4.7619399  |
| C | 8.3658268 | 2.7092480  | 3.6671235  |
| C | 5.0972456 | 2.4162770  | 0.9146458  |
| C | 4.5796915 | 3.7998428  | 1.2116983  |
| C | 3.0732442 | 3.5093830  | 1.2677087  |
| O | 2.8524457 | 2.3388328  | 0.4730884  |
| C | 4.0735306 | 1.6379416  | 0.4102851  |
| O | 4.0538087 | 0.4840909  | -0.0851350 |
| S | 6.1276974 | -0.2368493 | -2.3710895 |
| C | 6.4693594 | -1.2237814 | 0.9030094  |
| C | 7.1818181 | -1.0617105 | 3.5817990  |
| C | 7.3446502 | 4.7093417  | 6.6340468  |
| N | 7.3985767 | 5.4168232  | 7.5494600  |
| H | 7.1824979 | 2.8785433  | 0.6625802  |
| H | 6.6863767 | 1.3502006  | -0.0551829 |
| H | 8.1298791 | 0.9151078  | 1.8242506  |
| H | 5.0406203 | 1.9726174  | 3.7536004  |
| H | 5.1619055 | 3.4671649  | 5.7167814  |
| H | 9.3828903 | 4.0112267  | 5.0515019  |
| H | 9.2631343 | 2.4923457  | 3.0946142  |
| H | 4.9200599 | 4.2363876  | 2.1596981  |
| H | 4.8211154 | 4.5309361  | 0.4193705  |
| H | 2.4450053 | 4.3147751  | 0.8788514  |
| H | 2.7695302 | 3.2881520  | 2.3010498  |
| H | 6.1795540 | -2.2488857 | 1.1435456  |
| H | 5.8298613 | -0.8217293 | 0.1146412  |
| H | 7.5334753 | -1.1674841 | 0.6635561  |
| H | 6.7639408 | -2.0557373 | 3.7503086  |
| H | 7.1451533 | -0.4854441 | 4.5078188  |
| H | 8.2024911 | -1.1279631 | 3.2001353  |

4b\_sy\_5\_r.log

E = -1184.834609  
H = -1184.523209  
G = -1184.593098

NImag=0

|   |            |            |            |
|---|------------|------------|------------|
| C | -1.4985212 | -0.0473101 | 1.4091789  |
| C | -0.5067096 | 0.9981605  | 0.8640549  |
| C | 0.0078107  | 0.7123886  | -0.5255481 |
| C | -0.8751425 | 0.5109764  | -1.5935635 |
| C | -0.3880467 | 0.2457599  | -2.8669656 |
| C | 0.9958089  | 0.1782358  | -3.0721818 |
| C | 1.8891145  | 0.3813659  | -2.0148484 |
| C | 1.3867044  | 0.6537327  | -0.7474845 |
| C | -0.8533556 | -1.3860268 | 1.5255790  |

|   |            |            |            |
|---|------------|------------|------------|
| C | 0.1235087  | -1.7669415 | 2.6064723  |
| C | 0.4413719  | -3.2047790 | 2.1763626  |
| O | -0.6951469 | -3.6673192 | 1.4435454  |
| C | -1.3801712 | -2.5315625 | 0.9487699  |
| O | -2.3110220 | -2.7379273 | 0.1409252  |
| S | -1.3197231 | 2.6678742  | 0.8185392  |
| C | -1.4747942 | 3.0622946  | 2.5724306  |
| C | 0.0551273  | 3.7414233  | 0.3620167  |
| C | 1.5055142  | -0.1006948 | -4.3886188 |
| N | 1.9170985  | -0.3241449 | -5.4477877 |
| H | -1.8651140 | 0.3131807  | 2.3841682  |
| H | -2.3627537 | -0.1172864 | 0.7373997  |
| H | 0.3334114  | 1.1278549  | 1.5561057  |
| H | -1.9498825 | 0.5524674  | -1.4374282 |
| H | -1.0685833 | 0.0879005  | -3.6970187 |
| H | 2.9589451  | 0.3270899  | -2.1870557 |
| H | 2.0709791  | 0.8136825  | 0.0811559  |
| H | 1.0432458  | -1.1680896 | 2.6448882  |
| H | -0.3193731 | -1.7348106 | 3.6195629  |
| H | 0.6228879  | -3.8927148 | 3.0062330  |
| H | 1.3147015  | -3.2128894 | 1.5084572  |
| H | -1.6667422 | 4.1350324  | 2.6399741  |
| H | -2.3246724 | 2.5108866  | 2.9741568  |
| H | -0.5479577 | 2.7987685  | 3.0865237  |
| H | -0.2842327 | 4.7702895  | 0.4964456  |
| H | 0.2878112  | 3.5616665  | -0.6885500 |
| H | 0.9135356  | 3.5253405  | 1.0016963  |

4b\_sy\_5\_ts1.log

E = -1184.809791

H = -1184.500674

G = -1184.567745

NImag=1

|   |            |            |            |
|---|------------|------------|------------|
| C | 1.2432232  | 0.7674148  | 1.6391196  |
| C | 1.1678493  | -1.1902795 | 0.7234417  |
| C | -0.2159399 | -1.2175760 | 0.3261845  |
| C | -0.6902981 | -0.5615812 | -0.8363148 |
| C | -2.0481969 | -0.4508153 | -1.0908881 |
| C | -2.9803605 | -0.9698154 | -0.1808566 |
| C | -2.5315275 | -1.6283100 | 0.9812176  |
| C | -1.1777235 | -1.7506996 | 1.2215540  |
| C | 0.5421896  | 1.7240173  | 0.9345621  |
| C | -0.8928674 | 2.1663055  | 1.0756096  |
| C | -1.1061261 | 2.9564912  | -0.2289027 |
| O | 0.1973473  | 3.1850153  | -0.8062051 |
| C | 1.1187523  | 2.3687692  | -0.2097741 |
| O | 2.2504601  | 2.2749168  | -0.6799552 |
| S | 2.3277855  | -1.2399260 | -0.5962203 |
| C | 3.8565252  | -0.5374844 | 0.0519757  |
| C | 2.8233045  | -2.9798979 | -0.6979839 |
| C | -4.3823228 | -0.8429142 | -0.4386602 |
| N | -5.5198148 | -0.7397300 | -0.6457298 |
| H | 0.8164387  | 0.3657435  | 2.5559057  |
| H | 2.3280315  | 0.7951455  | 1.6169531  |
| H | 1.4686526  | -1.8395096 | 1.5457814  |
| H | 0.0086138  | -0.1306937 | -1.5474451 |
| H | -2.3951835 | 0.0537807  | -1.9877729 |
| H | -3.2531272 | -2.0390614 | 1.6807243  |
| H | -0.8362752 | -2.2561430 | 2.1209082  |
| H | -1.6070594 | 1.3380697  | 1.1478202  |
| H | -1.0421168 | 2.8101059  | 1.9515552  |

|   |            |            |            |
|---|------------|------------|------------|
| H | -1.5751163 | 3.9300533  | -0.0770756 |
| H | -1.6918899 | 2.3856974  | -0.9565995 |
| H | 4.6572218  | -0.8589191 | -0.6174498 |
| H | 3.7520857  | 0.5479894  | 0.0186660  |
| H | 4.0327260  | -0.9054158 | 1.0650487  |
| H | 3.6032233  | -3.0711546 | -1.4571486 |
| H | 1.9412862  | -3.5498048 | -0.9942310 |
| H | 3.1868531  | -3.3055544 | 0.2788947  |

4b\_sy\_5\_ts1\_rot1.log

E = -1184.809658  
H = -1184.500536  
G = -1184.567324

NImag=1

|   |            |            |            |
|---|------------|------------|------------|
| C | 1.1819505  | 1.7206332  | -0.6215676 |
| C | 1.6180741  | -0.0825412 | 0.3946903  |
| C | 0.3905125  | -0.8380200 | 0.3141588  |
| C | 0.1272492  | -1.8558693 | -0.6350481 |
| C | -1.1277500 | -2.4226174 | -0.7483436 |
| C | -2.1777120 | -1.9829332 | 0.0803212  |
| C | -1.9409943 | -0.9815885 | 1.0316851  |
| C | -0.6777513 | -0.4216048 | 1.1442972  |
| C | -0.0427166 | 2.2192827  | -0.2158905 |
| C | -0.3513701 | 3.0051517  | 1.0326017  |
| C | -1.8819756 | 2.8793250  | 1.1039979  |
| O | -2.3252504 | 2.4898669  | -0.2086085 |
| C | -1.2709447 | 1.9598898  | -0.9163853 |
| O | -1.4846245 | 1.4300940  | -2.0012684 |
| S | 3.0379033  | -0.8360764 | -0.3142737 |
| C | 4.2352980  | 0.5092145  | -0.3894605 |
| C | 3.7879440  | -1.8370740 | 0.9967549  |
| C | -3.4789431 | -2.5681990 | -0.0395449 |
| N | -4.5331261 | -3.0437022 | -0.1372241 |
| H | 2.0864244  | 2.1956733  | -0.2504050 |
| H | 1.2497708  | 1.3112551  | -1.6286522 |
| H | 1.8524315  | 0.3536049  | 1.3662509  |
| H | 0.9121544  | -2.2072430 | -1.2987232 |
| H | -1.3094867 | -3.2045026 | -1.4790860 |
| H | -2.7478530 | -0.6475579 | 1.6774477  |
| H | -0.4955239 | 0.3356492  | 1.9010302  |
| H | 0.1175520  | 2.5923018  | 1.9339781  |
| H | -0.0447341 | 4.0566707  | 0.9569544  |
| H | -2.3880600 | 3.8110393  | 1.3627334  |
| H | -2.1885303 | 2.0980478  | 1.8086464  |
| H | 5.2104351  | 0.0568837  | -0.5795524 |
| H | 3.9655408  | 1.1636269  | -1.2185494 |
| H | 4.2381950  | 1.0496397  | 0.5592687  |
| H | 4.7313860  | -2.2401700 | 0.6219126  |
| H | 3.0932867  | -2.6491950 | 1.2175181  |
| H | 3.9478685  | -1.2104227 | 1.8764828  |

4b\_sy\_6.log

E = -1184.833774  
H = -1184.521757  
G = -1184.588194

NImag=0

|   |           |           |           |
|---|-----------|-----------|-----------|
| C | 4.5166828 | 2.1803026 | 2.2776055 |
| C | 6.0309635 | 2.0395264 | 2.3988294 |
| C | 6.6499697 | 2.5627344 | 3.6719075 |
| C | 5.9307107 | 2.6162354 | 4.8712104 |

|   |           |            |            |
|---|-----------|------------|------------|
| C | 6.5320850 | 3.0862427  | 6.0320730  |
| C | 7.8682656 | 3.5030280  | 5.9928582  |
| C | 8.5993932 | 3.4592182  | 4.8003382  |
| C | 7.9821127 | 2.9912053  | 3.6465658  |
| C | 4.0261851 | 2.1091844  | 0.8651340  |
| C | 2.5594488 | 2.0509286  | 0.5348036  |
| C | 2.6228428 | 2.1248201  | -0.9948232 |
| O | 3.9082670 | 1.6175102  | -1.3640761 |
| C | 4.7586832 | 1.7537552  | -0.2478027 |
| O | 5.9774450 | 1.4848649  | -0.4355081 |
| S | 6.6288568 | 0.2669735  | 2.1825651  |
| C | 6.5909754 | -0.3884834 | 3.8680756  |
| C | 5.2842978 | -0.7301085 | 1.5012645  |
| C | 8.4950125 | 3.9886080  | 7.1938504  |
| N | 8.9992673 | 4.3785455  | 8.1606910  |
| H | 4.0128726 | 1.4389076  | 2.9264921  |
| H | 4.2774809 | 3.1517408  | 2.7378238  |
| H | 6.5112828 | 2.5090871  | 1.5393781  |
| H | 4.8964050 | 2.2878401  | 4.9060476  |
| H | 5.9772030 | 3.1297144  | 6.9633686  |
| H | 9.6316084 | 3.7925157  | 4.7809135  |
| H | 8.5394941 | 2.9621150  | 2.7137338  |
| H | 2.0867812 | 1.1115059  | 0.8781903  |
| H | 1.9587360 | 2.8745145  | 0.9416071  |
| H | 2.5519625 | 3.1699811  | -1.3269797 |
| H | 1.8582469 | 1.5361251  | -1.5077133 |
| H | 6.7942679 | -1.4577348 | 3.7827305  |
| H | 7.3795990 | 0.0873343  | 4.4510523  |
| H | 5.6098895 | -0.2223407 | 4.3184998  |
| H | 5.5834094 | -1.7643548 | 1.6867749  |
| H | 5.2344820 | -0.5289956 | 0.4338081  |
| H | 4.3469141 | -0.5100473 | 2.0144102  |

4b\_sy\_7.log

E = -1184.837589

H = -1184.525885

G = -1184.593869

NImag=0

|   |           |            |            |
|---|-----------|------------|------------|
| C | 4.8164856 | 2.8013740  | 2.1178010  |
| C | 6.2097433 | 2.1919397  | 2.3984142  |
| C | 6.8160156 | 2.6471368  | 3.7015996  |
| C | 6.1263717 | 2.4830454  | 4.9102897  |
| C | 6.6851688 | 2.9210446  | 6.1038979  |
| C | 7.9424118 | 3.5383764  | 6.0861187  |
| C | 8.6399607 | 3.7126802  | 4.8859748  |
| C | 8.0726695 | 3.2601053  | 3.6999649  |
| C | 4.2043294 | 2.3982530  | 0.8215668  |
| C | 4.7604927 | 2.7463818  | -0.5341537 |
| C | 3.7041339 | 2.0881543  | -1.4306677 |
| O | 3.1383689 | 1.0205433  | -0.6627961 |
| C | 3.3469408 | 1.3155347  | 0.7041013  |
| O | 2.7937031 | 0.5643152  | 1.5365849  |
| S | 6.0598691 | 0.3360500  | 2.4337679  |
| C | 6.2365661 | -0.1614078 | 0.7044485  |
| C | 7.7023173 | -0.1410462 | 3.0175241  |
| C | 8.5253848 | 3.9985757  | 7.3186510  |
| N | 8.9950214 | 4.3688817  | 8.3103225  |
| H | 4.1485468 | 2.5315872  | 2.9444410  |
| H | 4.9796987 | 3.8872979  | 2.1832668  |
| H | 6.9007161 | 2.3926257  | 1.5722196  |
| H | 5.1503904 | 2.0053091  | 4.9285305  |

|   |           |            |            |
|---|-----------|------------|------------|
| H | 6.1567358 | 2.7908888  | 7.0424742  |
| H | 9.6130715 | 4.1923713  | 4.8863620  |
| H | 8.6093296 | 3.3841608  | 2.7637472  |
| H | 4.8351295 | 3.8210579  | -0.7434797 |
| H | 5.7622254 | 2.3161098  | -0.7220939 |
| H | 4.0990407 | 1.6715853  | -2.3607965 |
| H | 2.9073119 | 2.8060602  | -1.6698238 |
| H | 6.5072283 | -1.2194955 | 0.7202946  |
| H | 5.2817454 | -0.0255803 | 0.1989812  |
| H | 7.0277653 | 0.4301118  | 0.2395326  |
| H | 7.7819751 | -1.2213028 | 2.8811993  |
| H | 7.7770002 | 0.1024333  | 4.0777273  |
| H | 8.4669348 | 0.3805415  | 2.4374072  |

4b\_sy\_7\_ts1.log

E = -1184.806622

H = -1184.497883

G = -1184.567714

NImag=1

|   |            |            |            |
|---|------------|------------|------------|
| C | 0.8856698  | -1.2310815 | -0.1280929 |
| C | -0.0754531 | 0.6409664  | -0.7170582 |
| C | -1.4432965 | 0.2981571  | -0.4274956 |
| C | -2.0627844 | 0.4989612  | 0.8317588  |
| C | -3.3460839 | 0.0450732  | 1.0820376  |
| C | -4.0619632 | -0.6375828 | 0.0849124  |
| C | -3.4640594 | -0.8613713 | -1.1678501 |
| C | -2.1834271 | -0.4029630 | -1.4138771 |
| C | 2.2606387  | -1.2938147 | -0.1308106 |
| C | 3.1919763  | -1.4511492 | -1.3019968 |
| C | 4.5287557  | -1.6717883 | -0.5840166 |
| O | 4.3826822  | -1.0747116 | 0.7222983  |
| C | 3.0515429  | -0.9576685 | 1.0278580  |
| O | 2.7127045  | -0.5906889 | 2.1456067  |
| S | 0.6521829  | 1.9039394  | 0.2582406  |
| C | 2.2791284  | 2.0713733  | -0.4988597 |
| C | -0.0837278 | 3.4671695  | -0.2985917 |
| C | -5.3899971 | -1.1016571 | 0.3422764  |
| N | -6.4678476 | -1.4793875 | 0.5504016  |
| H | 0.3775728  | -1.2162654 | 0.8349433  |
| H | 0.3277472  | -1.6873437 | -0.9431200 |
| H | 0.1976281  | 0.7378697  | -1.7672712 |
| H | -1.5370078 | 1.0196801  | 1.6278830  |
| H | -3.8033460 | 0.2161490  | 2.0518546  |
| H | -4.0129127 | -1.3901613 | -1.9411545 |
| H | -1.7318949 | -0.5748305 | -2.3872545 |
| H | 2.9472900  | -2.2888200 | -1.9611233 |
| H | 3.2266594  | -0.5387125 | -1.9173057 |
| H | 5.3819366  | -1.1979257 | -1.0708127 |
| H | 4.7353003  | -2.7382403 | -0.4443111 |
| H | 2.7208402  | 2.9888836  | -0.1067047 |
| H | 2.8876750  | 1.2167150  | -0.2100846 |
| H | 2.1631487  | 2.1273511  | -1.5831809 |
| H | 0.4256185  | 4.2859323  | 0.2149263  |
| H | -1.1379737 | 3.4473594  | -0.0160658 |
| H | 0.0271618  | 3.5480872  | -1.3817401 |

4b\_sy\_8.log

E = -1184.833581

H = -1184.521560

G = -1184.587721

NImag=0

|   |           |            |            |
|---|-----------|------------|------------|
| C | 6.5715948 | 1.9848084  | 0.8893603  |
| C | 7.3070792 | 1.4108510  | 2.1200528  |
| C | 7.2651699 | 2.2292942  | 3.3904752  |
| C | 6.0594697 | 2.6481447  | 3.9701407  |
| C | 6.0641960 | 3.4177104  | 5.1275306  |
| C | 7.2843815 | 3.7722045  | 5.7145993  |
| C | 8.4965588 | 3.3605877  | 5.1499474  |
| C | 8.4767287 | 2.5898714  | 3.9939076  |
| C | 5.1126362 | 2.2929345  | 0.9644823  |
| C | 4.5293866 | 3.6752217  | 1.1197874  |
| C | 3.0340971 | 3.3364685  | 1.0830658  |
| O | 2.9143423 | 2.1163181  | 0.3428142  |
| C | 4.1594071 | 1.4662215  | 0.4039601  |
| O | 4.2182043 | 0.2892461  | -0.0353889 |
| S | 6.9034474 | -0.3469968 | 2.5607614  |
| C | 5.1532054 | -0.4850238 | 2.9782562  |
| C | 6.9205798 | -1.1853500 | 0.9641600  |
| C | 7.2917087 | 4.5690381  | 6.9129274  |
| N | 7.2974243 | 5.2105991  | 7.8770452  |
| H | 7.1393857 | 2.9016506  | 0.6671988  |
| H | 6.7757588 | 1.2996730  | 0.0552049  |
| H | 8.3607790 | 1.2742037  | 1.8461816  |
| H | 5.1157088 | 2.3852502  | 3.5039087  |
| H | 5.1309467 | 3.7440068  | 5.5745228  |
| H | 9.4373130 | 3.6414280  | 5.6115011  |
| H | 9.4147883 | 2.2678952  | 3.5505012  |
| H | 4.7811558 | 4.1944529  | 2.0534876  |
| H | 4.8125428 | 4.3521983  | 0.2937553  |
| H | 2.4102093 | 4.0949597  | 0.6038332  |
| H | 2.6617220 | 3.1599443  | 2.1023004  |
| H | 5.0080183 | -1.5422795 | 3.2156331  |
| H | 4.9593046 | 0.1107266  | 3.8706399  |
| H | 4.5438597 | -0.1880968 | 2.1233170  |
| H | 6.8021796 | -2.2501850 | 1.1761243  |
| H | 7.8943709 | -1.0072991 | 0.5038345  |
| H | 6.0930389 | -0.8033780 | 0.3575704  |

4b\_sy\_8\_ts1.log

E = -1184.806199  
H = -1184.497384  
G = -1184.564178

NImag=1

|   |            |            |            |
|---|------------|------------|------------|
| C | -1.3333777 | 0.4179099  | -1.5792837 |
| C | -0.9368281 | -1.5099317 | -0.6446655 |
| C | 0.4465741  | -1.3505329 | -0.2941895 |
| C | 0.8536998  | -0.7952903 | 0.9428859  |
| C | 2.1813524  | -0.4792254 | 1.1850124  |
| C | 3.1467539  | -0.6954480 | 0.1909324  |
| C | 2.7669922  | -1.2601908 | -1.0436933 |
| C | 1.4450360  | -1.5808673 | -1.2756018 |
| C | -0.8090211 | 1.5127208  | -0.9250696 |
| C | 0.5995540  | 2.0567215  | -0.9810742 |
| C | 0.6109300  | 2.9621543  | 0.2533445  |
| O | -0.7647982 | 3.3222359  | 0.4922301  |
| C | -1.5860340 | 2.3839847  | -0.0801731 |
| O | -2.7914862 | 2.4201926  | 0.1411380  |
| S | -2.0255728 | -1.9136989 | 0.6909881  |
| C | -2.7961193 | -0.3780680 | 1.2751312  |
| C | -3.4175666 | -2.6242100 | -0.2047866 |
| C | 4.5156981  | -0.3569441 | 0.4348299  |

|   |            |            |            |
|---|------------|------------|------------|
| N | 5.6264365  | -0.0828479 | 0.6310290  |
| H | -0.8016131 | 0.0136396  | -2.4374141 |
| H | -2.4147549 | 0.2973746  | -1.6091683 |
| H | -1.1746629 | -2.1374980 | -1.5007197 |
| H | 0.1268637  | -0.5953882 | 1.7263199  |
| H | 2.4750781  | -0.0492875 | 2.1379243  |
| H | 3.5178807  | -1.4400155 | -1.8069722 |
| H | 1.1561001  | -2.0111376 | -2.2307241 |
| H | 1.3825396  | 1.2959388  | -0.9198682 |
| H | 0.7705809  | 2.6439913  | -1.8940654 |
| H | 1.1789054  | 3.8851452  | 0.1294759  |
| H | 0.9773426  | 2.4236503  | 1.1361858  |
| H | -3.5093255 | -0.6745497 | 2.0477492  |
| H | -2.0157543 | 0.2466324  | 1.7124086  |
| H | -3.2850091 | 0.1460935  | 0.4553026  |
| H | -4.2338932 | -2.7583765 | 0.5064640  |
| H | -3.1015891 | -3.5892656 | -0.6027182 |
| H | -3.7080971 | -1.9437568 | -1.0075174 |

4b\_sy\_9.log

E = -1184.835301  
H = -1184.523717  
G = -1184.590555

NImag=0

|   |           |            |            |
|---|-----------|------------|------------|
| C | 6.3965429 | 2.3823949  | 0.6961928  |
| C | 7.2187440 | 1.7000553  | 1.8142534  |
| C | 7.1960985 | 2.3381076  | 3.1779755  |
| C | 6.0017941 | 2.7003433  | 3.8187432  |
| C | 6.0294788 | 3.3271437  | 5.0586887  |
| C | 7.2602683 | 3.5934868  | 5.6704979  |
| C | 8.4606588 | 3.2332703  | 5.0487212  |
| C | 8.4183104 | 2.6067510  | 3.8089492  |
| C | 4.9113999 | 2.4621127  | 0.8431133  |
| C | 4.1146637 | 3.7248368  | 1.0441957  |
| C | 2.7000877 | 3.1334369  | 1.1266979  |
| O | 2.7337771 | 1.8909998  | 0.4153345  |
| C | 4.0768994 | 1.4606933  | 0.3909342  |
| O | 4.3069428 | 0.2931905  | -0.0077818 |
| S | 6.8101285 | -0.1131529 | 1.8430877  |
| C | 8.0857470 | -0.7412180 | 2.9539438  |
| C | 5.3663387 | -0.3417061 | 2.8954458  |
| C | 7.2903850 | 4.2445639  | 6.9536211  |
| N | 7.3146193 | 4.7687442  | 7.9860419  |
| H | 6.8251437 | 3.3905776  | 0.6180336  |
| H | 6.6699182 | 1.8562506  | -0.2314237 |
| H | 8.2610706 | 1.6441191  | 1.4766588  |
| H | 5.0512470 | 2.4964098  | 3.3371724  |
| H | 5.1055021 | 3.6103943  | 5.5521414  |
| H | 9.4096426 | 3.4433688  | 5.5305722  |
| H | 9.3479567 | 2.3271732  | 3.3210710  |
| H | 4.3477083 | 4.2865867  | 1.9590420  |
| H | 4.2085892 | 4.4353589  | 0.2035902  |
| H | 1.9222162 | 3.7634396  | 0.6878741  |
| H | 2.4395672 | 2.9243046  | 2.1742492  |
| H | 7.9152929 | -1.8147951 | 3.0583724  |
| H | 9.0561772 | -0.5655873 | 2.4863470  |
| H | 8.0207191 | -0.2483536 | 3.9258716  |
| H | 5.2210888 | -1.4229476 | 2.9591590  |
| H | 4.5156431 | 0.1212867  | 2.3984212  |
| H | 5.5549322 | 0.0759596  | 3.8856918  |

4b\_sy\_9\_ts1.log

E = -1184.807422

H = -1184.498061

G = -1184.564135

NImag=1

|   |            |            |            |
|---|------------|------------|------------|
| C | -1.5174596 | -0.6727511 | 1.6448269  |
| C | -1.0219868 | 1.3351572  | 1.0582967  |
| C | 0.3258769  | 1.1866668  | 0.5583518  |
| C | 0.6213557  | 0.6476368  | -0.7129399 |
| C | 1.9286621  | 0.3688572  | -1.0862732 |
| C | 2.9782362  | 0.6026412  | -0.1883233 |
| C | 2.7086689  | 1.1408024  | 1.0843619  |
| C | 1.4055803  | 1.4274262  | 1.4422339  |
| C | -0.9226403 | -1.6572650 | 0.8775432  |
| C | 0.4701824  | -2.2267127 | 1.0096784  |
| C | 0.6007900  | -3.0091789 | -0.3026433 |
| O | -0.7434715 | -3.2581896 | -0.7609306 |
| C | -1.6011614 | -2.3647942 | -0.1729846 |
| O | -2.7680778 | -2.3119713 | -0.5539760 |
| S | -2.3173922 | 1.9884642  | 0.0741495  |
| C | -1.6245037 | 3.2412359  | -1.0367367 |
| C | -2.8726902 | 0.7751480  | -1.1508602 |
| C | 4.3268989  | 0.3033046  | -0.5691857 |
| N | 5.4192382  | 0.0611118  | -0.8759538 |
| H | -1.0862348 | -0.4351507 | 2.6139144  |
| H | -2.5987541 | -0.5574979 | 1.5891622  |
| H | -1.1079979 | 1.8241280  | 2.0263645  |
| H | -0.1723961 | 0.4252141  | -1.4166298 |
| H | 2.1395731  | -0.0474828 | -2.0666834 |
| H | 3.5246363  | 1.3291874  | 1.7750857  |
| H | 1.1985146  | 1.8395130  | 2.4261530  |
| H | 1.2577561  | -1.4712220 | 1.0931285  |
| H | 0.5564767  | -2.8973857 | 1.8755654  |
| H | 1.0994489  | -3.9739091 | -0.1982630 |
| H | 1.1124017  | -2.4181838 | -1.0709408 |
| H | -2.4357870 | 3.5953684  | -1.6765197 |
| H | -1.2514139 | 4.0556058  | -0.4142933 |
| H | -0.8214728 | 2.8099354  | -1.6363926 |
| H | -3.7901917 | 1.1883482  | -1.5762186 |
| H | -3.0850621 | -0.1674986 | -0.6438229 |
| H | -2.1301413 | 0.6371499  | -1.9370956 |

4b\_sy\_c\_1\_ts2.log

E = -1184.826011

H = -1184.516195

G = -1184.585730

NImag=1

|   |            |            |            |
|---|------------|------------|------------|
| C | 1.9262354  | -0.1067486 | -1.0519125 |
| C | 1.0183075  | -0.6944559 | -0.0236908 |
| C | -0.4209525 | -0.3195119 | 0.0184106  |
| C | -1.1658272 | -0.1432373 | -1.1552086 |
| C | -2.5250920 | 0.1353128  | -1.0901997 |
| C | -3.1473425 | 0.2469346  | 0.1591745  |
| C | -2.4161365 | 0.0760224  | 1.3426592  |
| C | -1.0612355 | -0.2123058 | 1.2622985  |
| C | 2.0045300  | 1.2390553  | -0.4182322 |
| C | 3.0063303  | 1.6820828  | 0.6102582  |
| C | 2.3652121  | 3.0029938  | 1.0571716  |
| O | 1.5424891  | 3.4432351  | -0.0337887 |
| C | 1.2226963  | 2.3322653  | -0.8186074 |



|   |            |            |            |
|---|------------|------------|------------|
| O | 0.3758793  | 2.4631639  | -1.7129153 |
| S | 0.9200998  | -2.8422390 | -0.3846361 |
| C | 2.6189846  | -3.2467019 | 0.0743456  |
| C | 0.0567405  | -3.3734762 | 1.1088792  |
| C | -4.5534730 | 0.5393907  | 0.2279866  |
| N | -5.6867609 | 0.7735402  | 0.2837671  |
| H | 2.8903648  | -0.6241872 | -1.0964868 |
| H | 1.4789880  | -0.0823401 | -2.0499621 |
| H | 1.4725018  | -0.7841289 | 0.9654959  |
| H | -0.6857227 | -0.2237999 | -2.1241625 |
| H | -3.1044791 | 0.2698619  | -1.9977064 |
| H | -2.9081820 | 0.1679356  | 2.3051451  |
| H | -0.4845142 | -0.3482297 | 2.1733324  |
| H | 3.1286332  | 0.9991308  | 1.4598830  |
| H | 4.0086279  | 1.8463290  | 0.1809376  |
| H | 3.0824882  | 3.7944448  | 1.2838473  |
| H | 1.7196230  | 2.8405667  | 1.9302662  |
| H | 2.6719917  | -4.3086531 | 0.3227581  |
| H | 3.2586834  | -3.0417193 | -0.7850470 |
| H | 2.9272760  | -2.6417454 | 0.9314755  |
| H | 0.2025452  | -4.4486791 | 1.2322439  |
| H | -1.0056193 | -3.1618598 | 0.9762243  |
| H | 0.4469094  | -2.8355048 | 1.9769197  |

4b\_sy\_c\_prod\_1.log

E = -706.954852

H = -706.726336

G = -706.781326

NImag=0

|   |            |            |            |
|---|------------|------------|------------|
| C | 2.6949589  | 1.5083449  | 0.0524246  |
| O | 2.1466341  | 2.4911268  | 0.9657815  |
| C | 1.0028105  | 2.0426271  | 1.5109792  |
| C | 0.6056324  | 0.7618646  | 0.8559209  |
| C | 1.5287477  | 0.5918687  | -0.3328632 |
| O | 0.4315863  | 2.6375018  | 2.3953958  |
| C | 0.1066764  | -0.3487880 | 1.7390009  |
| C | -0.8707053 | 0.4029542  | 0.8887839  |
| C | -1.5221769 | -0.1747006 | -0.3168006 |
| C | -1.0060812 | -1.2823318 | -1.0054476 |
| C | -1.6438247 | -1.7775768 | -2.1353343 |
| C | -2.8183402 | -1.1652824 | -2.5908353 |
| C | -3.3500385 | -0.0604514 | -1.9155334 |
| C | -2.6985236 | 0.4248320  | -0.7891036 |
| C | -3.4839818 | -1.6776739 | -3.7571591 |
| N | -4.0205471 | -2.0903483 | -4.6974988 |
| H | 3.4824385  | 0.9682735  | 0.5845324  |
| H | 3.1242437  | 2.0508285  | -0.7890536 |
| H | 1.0465669  | 0.9434949  | -1.2509713 |
| H | 1.8652768  | -0.4351594 | -0.4822873 |
| H | 0.3843664  | -1.3559840 | 1.4434056  |
| H | 0.0740173  | -0.1610133 | 2.8074344  |
| H | -1.4794370 | 1.1326810  | 1.4164261  |
| H | -0.1011061 | -1.7738917 | -0.6623633 |
| H | -1.2400284 | -2.6354988 | -2.6628957 |
| H | -4.2617889 | 0.4080585  | -2.2715432 |
| H | -3.1086763 | 1.2816438  | -0.2625947 |

4b\_sy\_c\_prod\_2.log

E = -706.954584

H = -706.726125

G = -706.781051  
 NImag=0

|   |            |            |            |
|---|------------|------------|------------|
| C | 2.1487740  | 1.7624516  | -0.4083961 |
| O | 1.9849103  | 2.5024846  | 0.8275868  |
| C | 1.0663346  | 1.9125005  | 1.6121844  |
| C | 0.6392374  | 0.6209021  | 0.9979696  |
| C | 1.6150678  | 0.3553323  | -0.1272378 |
| O | 0.6847531  | 2.4089772  | 2.6468057  |
| C | -0.0180912 | -0.4016330 | 1.8650628  |
| C | -0.8783022 | 0.3996110  | 0.9376465  |
| C | -1.5132986 | -0.1647264 | -0.2818801 |
| C | -1.1225252 | -1.3872026 | -0.8471402 |
| C | -1.7406150 | -1.8709239 | -1.9932883 |
| C | -2.7686550 | -1.1295758 | -2.5886015 |
| C | -3.1757753 | 0.0911188  | -2.0363605 |
| C | -2.5458831 | 0.5621874  | -0.8921827 |
| C | -3.4133948 | -1.6277619 | -3.7728116 |
| N | -3.9322728 | -2.0294506 | -4.7276892 |
| H | 3.2069775  | 1.7893578  | -0.6659977 |
| H | 1.5669337  | 2.2758047  | -1.1787236 |
| H | 1.1606358  | -0.0819398 | -1.0181298 |
| H | 2.4177111  | -0.3040538 | 0.2164879  |
| H | 0.1776173  | -1.4404111 | 1.6173975  |
| H | -0.0941451 | -0.1735570 | 2.9236757  |
| H | -1.4506960 | 1.1987041  | 1.4009502  |
| H | -0.3312203 | -1.9759299 | -0.3933421 |
| H | -1.4344419 | -2.8180307 | -2.4252734 |
| H | -3.9757092 | 0.6583005  | -2.5011208 |
| H | -2.8594270 | 1.5077639  | -0.4592918 |

4b\_sy\_tr\_2\_ts2.log  
 E = -1184.826876  
 H = -1184.516595  
 G = -1184.585464  
 NImag=1

|   |            |            |            |
|---|------------|------------|------------|
| C | -1.9050379 | -0.0566069 | 0.7111534  |
| C | -0.9669852 | -0.4919564 | -0.3657609 |
| C | 0.4978274  | -0.2900693 | -0.2186949 |
| C | 1.1110539  | -0.1880118 | 1.0384669  |
| C | 2.4900968  | -0.0584689 | 1.1430468  |
| C | 3.2700415  | -0.0349067 | -0.0197010 |
| C | 2.6742130  | -0.1362410 | -1.2838710 |
| C | 1.2954175  | -0.2644918 | -1.3731720 |
| C | -1.7311145 | 1.4131969  | 0.4831725  |
| C | -0.8549945 | 2.3832917  | 1.2237405  |
| C | -1.3820398 | 3.7102592  | 0.6527609  |
| O | -1.9684492 | 3.4022653  | -0.6209951 |
| C | -2.3065550 | 2.0506782  | -0.6271163 |
| O | -3.0096816 | 1.6160558  | -1.5528255 |
| S | -1.0316781 | -2.6702789 | -0.6389199 |
| C | -0.2718111 | -3.2129894 | 0.9044980  |
| C | -2.7673902 | -3.0210677 | -0.2817429 |
| C | 4.6981207  | 0.0967412  | 0.0851223  |
| N | 5.8486523  | 0.2017679  | 0.1696776  |
| H | -2.9255556 | -0.3897607 | 0.5071547  |
| H | -1.6130395 | -0.3773847 | 1.7145121  |
| H | -1.3463127 | -0.2726710 | -1.3634891 |
| H | 0.5134731  | -0.2065021 | 1.9445403  |
| H | 2.9635813  | 0.0222161  | 2.1159726  |
| H | 3.2877445  | -0.1127773 | -2.1783383 |
| H | 0.8242443  | -0.3445062 | -2.3494064 |

|   |            |            |            |
|---|------------|------------|------------|
| H | -0.9687047 | 2.3527040  | 2.3138402  |
| H | 0.2204984  | 2.2648499  | 1.0093885  |
| H | -0.6074721 | 4.4638042  | 0.4974344  |
| H | -2.1651922 | 4.1266010  | 1.2985449  |
| H | -0.5419499 | -4.2576640 | 1.0728618  |
| H | 0.8109315  | -3.1294083 | 0.7976454  |
| H | -0.6238660 | -2.5926344 | 1.7327346  |
| H | -2.9298366 | -4.0970880 | -0.3714759 |
| H | -3.3748187 | -2.4957524 | -1.0215273 |
| H | -3.0182192 | -2.6848434 | 0.7257803  |

4b\_sy\_tr\_3\_ts2.log

E = -1184.828172

H = -1184.518078

G = -1184.586346

NImag=1

|   |            |            |            |
|---|------------|------------|------------|
| C | -1.8099512 | 0.8389395  | -0.8772172 |
| C | -0.7722560 | 0.9300280  | 0.1907327  |
| C | 0.4690224  | 0.1278156  | 0.1165080  |
| C | 1.0468835  | -0.2405756 | -1.1081642 |
| C | 2.2406604  | -0.9508624 | -1.1400706 |
| C | 2.8646301  | -1.3039311 | 0.0625291  |
| C | 2.2963496  | -0.9544409 | 1.2949649  |
| C | 1.1070373  | -0.2405332 | 1.3119683  |
| C | -2.2841567 | -0.5381951 | -0.5370942 |
| C | -1.8758811 | -1.8364621 | -1.1721293 |
| C | -2.8775946 | -2.7910440 | -0.5018496 |
| O | -3.2796588 | -2.1645309 | 0.7255777  |
| C | -3.0469838 | -0.7948340 | 0.6124928  |
| O | -3.5012484 | -0.0402444 | 1.4869548  |
| S | -0.0790913 | 3.0270547  | 0.1942631  |
| C | 1.5568870  | 2.9792518  | 0.9542997  |
| C | 0.3908878  | 3.2080875  | -1.5368607 |
| C | 4.0997701  | -2.0401715 | 0.0320870  |
| N | 5.0951592  | -2.6320470 | 0.0076938  |
| H | -2.5788475 | 1.6084219  | -0.7442223 |
| H | -1.4093142 | 0.9095615  | -1.8914303 |
| H | -1.2038626 | 0.9837369  | 1.1892530  |
| H | 0.5637636  | 0.0184801  | -2.0452516 |
| H | 2.6876090  | -1.2342413 | -2.0871748 |
| H | 2.7850361  | -1.2405306 | 2.2203901  |
| H | 0.6596216  | 0.0390301  | 2.2620559  |
| H | -1.9817470 | -1.8595758 | -2.2631519 |
| H | -0.8367742 | -2.1313873 | -0.9437254 |
| H | -2.4631906 | -3.7725444 | -0.2632360 |
| H | -3.7688009 | -2.9195089 | -1.1286936 |
| H | 2.0056894  | 3.9713349  | 0.8688704  |
| H | 1.4336856  | 2.7223915  | 2.0081302  |
| H | 2.1827049  | 2.2370451  | 0.4525199  |
| H | 0.9416995  | 4.1442919  | -1.6499642 |
| H | -0.5213250 | 3.2480649  | -2.1338338 |
| H | 1.0156588  | 2.3669761  | -1.8483083 |

4b\_sy\_tr\_prod\_1.log

E = -706.952817

H = -706.724813

G = -706.780289

NImag=0

|   |           |            |           |
|---|-----------|------------|-----------|
| C | 3.5831485 | -2.0769097 | 0.1379200 |
| O | 4.8300461 | -2.3908069 | 0.8102397 |

|   |           |            |            |
|---|-----------|------------|------------|
| C | 4.5913806 | -2.8825006 | 2.0420423  |
| C | 3.1180231 | -3.0203114 | 2.2344428  |
| C | 2.5203924 | -2.9147728 | 0.8491860  |
| O | 5.4849732 | -3.1470976 | 2.8118774  |
| C | 2.5856399 | -3.8340131 | 3.3733360  |
| C | 2.4969935 | -2.3450150 | 3.4524784  |
| C | 3.3287882 | -1.5410271 | 4.3985888  |
| C | 3.7027202 | -2.0377676 | 5.6502255  |
| C | 4.4604947 | -1.2643975 | 6.5232984  |
| C | 4.8485632 | 0.0237560  | 6.1378039  |
| C | 4.4801341 | 0.5380581  | 4.8869882  |
| C | 3.7237667 | -0.2481253 | 4.0287167  |
| C | 5.6318685 | 0.8296971  | 7.0349578  |
| N | 6.2626721 | 1.4795453  | 7.7574563  |
| H | 3.7127015 | -2.3197267 | -0.9162978 |
| H | 3.4044771 | -1.0036979 | 0.2520398  |
| H | 1.5396150 | -2.4361264 | 0.8354040  |
| H | 2.4408212 | -3.9058409 | 0.3905406  |
| H | 1.6737360 | -4.3923688 | 3.1889949  |
| H | 3.3294014 | -4.3268295 | 3.9935289  |
| H | 1.5262255 | -1.9067055 | 3.2290026  |
| H | 3.3992519 | -3.0370232 | 5.9474001  |
| H | 4.7504288 | -1.6500052 | 7.4953397  |
| H | 4.7880265 | 1.5377485  | 4.5984856  |
| H | 3.4376103 | 0.1403638  | 3.0544035  |

4b\_sy\_tr\_prod\_2.log

E = -706.951166

H = -706.723180

G = -706.779023

NImag=0

|   |           |            |            |
|---|-----------|------------|------------|
| C | 3.5702342 | -3.0938901 | -0.1095188 |
| O | 4.8044240 | -2.8489841 | 0.6092945  |
| C | 4.5789502 | -2.7870255 | 1.9369196  |
| C | 3.1081345 | -2.7978101 | 2.1868755  |
| C | 2.4508643 | -2.6442025 | 0.8312647  |
| O | 5.4854310 | -2.7467628 | 2.7356342  |
| C | 2.5976572 | -3.6948214 | 3.2942690  |
| C | 2.5274209 | -2.2140960 | 3.4549016  |
| C | 3.3660384 | -1.4644430 | 4.4394749  |
| C | 3.7420083 | -0.1461643 | 4.1504239  |
| C | 4.4946721 | 0.5929609  | 5.0524237  |
| C | 4.8753112 | 0.0064054  | 6.2673430  |
| C | 4.5011821 | -1.3068843 | 6.5742750  |
| C | 3.7476364 | -2.0324144 | 5.6579482  |
| C | 5.6541997 | 0.7636965  | 7.2091376  |
| N | 6.2816434 | 1.3745682  | 7.9678263  |
| H | 3.5218714 | -4.1644850 | -0.3269003 |
| H | 3.6186500 | -2.5312033 | -1.0411234 |
| H | 2.1948159 | -1.5956710 | 0.6497527  |
| H | 1.5519360 | -3.2529279 | 0.7177147  |
| H | 1.6803489 | -4.2383870 | 3.0941229  |
| H | 3.3536176 | -4.2283713 | 3.8634151  |
| H | 1.5508871 | -1.7655017 | 3.2786709  |
| H | 3.4460129 | 0.2995958  | 3.2043847  |
| H | 4.7903606 | 1.6121531  | 4.8255901  |
| H | 4.7974944 | -1.7482469 | 7.5203472  |
| H | 3.4551972 | -3.0511873 | 5.8939326  |

5a.log

E = -344.464791  
H = -344.353132  
G = -344.389281  
NImag=0

|   |            |            |            |
|---|------------|------------|------------|
| C | -1.8293453 | 0.4915536  | -0.6194113 |
| C | -2.3056113 | 1.6748954  | -0.2141424 |
| C | -1.9999083 | 2.9191637  | -0.9899420 |
| C | -1.7147562 | 2.5465842  | -2.4297099 |
| O | -0.7261331 | 1.4976106  | -2.5251731 |
| C | -0.8898477 | 0.4033968  | -1.7592038 |
| O | -0.2220776 | -0.5843722 | -1.9910232 |
| H | -2.0146806 | -0.4355201 | -0.0885148 |
| H | -2.9046207 | 1.7453677  | 0.6904269  |
| H | -1.1442641 | 3.4371259  | -0.5366449 |
| H | -2.8461878 | 3.6115428  | -0.9606029 |
| H | -1.3028525 | 3.3791971  | -2.9994276 |
| H | -2.6290149 | 2.1939556  | -2.9200308 |

5a\_sy\_c\_1.log  
E = -1184.828479  
H = -1184.516354  
G = -1184.583479  
NImag=0

|   |            |            |            |
|---|------------|------------|------------|
| C | -0.8818052 | 3.1429878  | -2.2700760 |
| C | -0.9134927 | 2.4852056  | -0.9140865 |
| C | -0.7947707 | 2.4683691  | -3.4778859 |
| O | -0.9455338 | 2.9301969  | -4.6353129 |
| C | -2.1039146 | 2.8787768  | -0.0055633 |
| C | -1.9508187 | 4.1616282  | 0.7917044  |
| C | -1.0573126 | 5.1657466  | 0.4037644  |
| C | -0.9385755 | 6.3313375  | 1.1530095  |
| C | -1.7224240 | 6.4956306  | 2.2996864  |
| C | -2.6165287 | 5.4974370  | 2.7046735  |
| C | -2.7217418 | 4.3374285  | 1.9486849  |
| O | -0.5164744 | 1.0919941  | -3.4461250 |
| C | -0.8312425 | 0.9566735  | -1.0507618 |
| C | 0.0490675  | 0.6091857  | -2.2344624 |
| S | -3.7898896 | 3.0290523  | -0.7985671 |
| C | -3.7748390 | 4.4610056  | -1.8988131 |
| C | -3.9909905 | 1.6838837  | -1.9826730 |
| C | -1.6023992 | 7.7014434  | 3.0761584  |
| N | -1.5066188 | 8.6716271  | 3.7010824  |
| H | -1.0527444 | 4.2111535  | -2.3443280 |
| H | -0.0487848 | 2.7881250  | -0.2983046 |
| H | -2.3011349 | 2.0684463  | 0.7085455  |
| H | -0.4414639 | 5.0448907  | -0.4809590 |
| H | -0.2435763 | 7.1083696  | 0.8528383  |
| H | -3.2116673 | 5.6291463  | 3.6020930  |
| H | -3.4048408 | 3.5551077  | 2.2693097  |
| H | -1.8172689 | 0.5125157  | -1.2179343 |
| H | -0.4289201 | 0.5145703  | -0.1329877 |
| H | 0.1485254  | -0.4732500 | -2.3521533 |
| H | 1.0539884  | 1.0376908  | -2.1016638 |
| H | -4.8244118 | 4.6755065  | -2.1119226 |
| H | -3.3313799 | 5.3020866  | -1.3622334 |
| H | -3.2170100 | 4.2290376  | -2.8042865 |
| H | -4.9491103 | 1.8735286  | -2.4729125 |
| H | -4.0437597 | 0.7469443  | -1.4272980 |
| H | -3.1719356 | 1.6922206  | -2.7025394 |

5a\_sy\_c\_1\_r.log

E = -1184.827150

H = -1184.514863

G = -1184.581328

NImag=0

|   |            |            |            |
|---|------------|------------|------------|
| C | 0.7907245  | -1.8860058 | -0.1979545 |
| C | 1.3750862  | -0.6467395 | -0.8394178 |
| C | 1.2589338  | -2.4594217 | 0.9734204  |
| O | 0.7202061  | -3.3311730 | 1.6945810  |
| C | 0.2706479  | 0.4344734  | -0.8359502 |
| C | -0.3776823 | 0.8707706  | 0.4696375  |
| C | 0.1688960  | 0.6065861  | 1.7319067  |
| C | -0.4653057 | 1.0579313  | 2.8841000  |
| C | -1.6595148 | 1.7795104  | 2.7828993  |
| C | -2.2290565 | 2.0384684  | 1.5320100  |
| C | -1.5857295 | 1.5786696  | 0.3900821  |
| O | 2.5153196  | -2.0259455 | 1.4379255  |
| C | 2.7091333  | -0.2337527 | -0.1857535 |
| C | 3.3586408  | -1.4500537 | 0.4505938  |
| S | 0.6746560  | 2.0290691  | -1.7367066 |
| C | 1.9227395  | 2.8899765  | -0.7603263 |
| C | 1.6063305  | 1.5150940  | -3.1909614 |
| C | -2.3116802 | 2.2493228  | 3.9762069  |
| N | -2.8358250 | 2.6295725  | 4.9363952  |
| H | -0.1720570 | -2.2341097 | -0.5624735 |
| H | 1.5702456  | -0.8357830 | -1.9041490 |
| H | -0.5320064 | 0.0694984  | -1.4898652 |
| H | 1.0754287  | 0.0248278  | 1.8383735  |
| H | -0.0385032 | 0.8478077  | 3.8591841  |
| H | -3.1637791 | 2.5840080  | 1.4580535  |
| H | -2.0409485 | 1.7662340  | -0.5791912 |
| H | 2.5740341  | 0.5284043  | 0.5863308  |
| H | 3.3966874  | 0.1853559  | -0.9293208 |
| H | 4.2870250  | -1.1757301 | 0.9590094  |
| H | 3.5914513  | -2.2025799 | -0.3167665 |
| H | 2.0101461  | 3.8875727  | -1.1949116 |
| H | 1.5512535  | 2.9674803  | 0.2640200  |
| H | 2.8760995  | 2.3662410  | -0.8004619 |
| H | 1.8133471  | 2.4235035  | -3.7606165 |
| H | 0.9658889  | 0.8513771  | -3.7751263 |
| H | 2.5348725  | 1.0216385  | -2.9038052 |

5a\_sy\_c\_1\_ts1.log

E = -1184.797740

H = -1184.488015

G = -1184.554515

NImag=1

|   |            |            |            |
|---|------------|------------|------------|
| C | 1.7660816  | -0.8405422 | 1.2752276  |
| C | 1.0718163  | -1.2652237 | 0.1457123  |
| C | 3.1699344  | -0.5616352 | 1.2305834  |
| O | 3.7892695  | 0.1494722  | 2.0225861  |
| C | 0.0436761  | 0.3306804  | -0.9103960 |
| C | -1.3567238 | 0.2134070  | -0.5694727 |
| C | -2.0488950 | 1.0842549  | 0.3047743  |
| C | -3.3664165 | 0.8471616  | 0.6633198  |
| C | -4.0385594 | -0.2813171 | 0.1711292  |
| C | -3.3700173 | -1.1679898 | -0.6920927 |
| C | -2.0585944 | -0.9218433 | -1.0507532 |
| O | 3.8898409  | -1.1186057 | 0.2048205  |
| C | 1.9041656  | -1.8722507 | -0.9782464 |
| C | 3.2759458  | -2.2410203 | -0.4471265 |

|   |            |            |            |
|---|------------|------------|------------|
| S | 0.7245381  | 1.9685536  | -0.7673193 |
| C | 1.2788599  | 2.2661851  | 0.9442476  |
| C | 2.3207471  | 1.7700831  | -1.5814801 |
| C | -5.3969496 | -0.5303102 | 0.5467493  |
| N | -6.4985417 | -0.7334545 | 0.8504143  |
| H | 1.2401175  | -0.5011311 | 2.1610896  |
| H | 0.0752882  | -1.6753413 | 0.2895338  |
| H | 0.3014637  | -0.0246678 | -1.9063376 |
| H | -1.5666592 | 1.9712436  | 0.7062525  |
| H | -3.8809955 | 1.5352124  | 1.3269287  |
| H | -3.8887381 | -2.0406672 | -1.0770041 |
| H | -1.5504713 | -1.6080440 | -1.7238251 |
| H | 2.0274363  | -1.1798413 | -1.8155036 |
| H | 1.4120619  | -2.7671477 | -1.3730901 |
| H | 3.9566150  | -2.5239038 | -1.2520672 |
| H | 3.2103254  | -3.0676493 | 0.2705831  |
| H | 2.2198068  | 1.7584010  | 1.1542741  |
| H | 1.3974802  | 3.3489977  | 1.0151872  |
| H | 0.5000514  | 1.9335122  | 1.6305244  |
| H | 2.8600693  | 2.7114861  | -1.4621569 |
| H | 2.1373831  | 1.5742148  | -2.6390439 |
| H | 2.8701755  | 0.9490846  | -1.1165596 |

5a\_sy\_c\_1\_ts2.log

E = -1184.817478

H = -1184.506547

G = -1184.573219

NImag=1

|   |            |            |            |
|---|------------|------------|------------|
| C | -1.6675459 | 1.7539339  | -1.1020678 |
| C | -2.1500520 | 0.4913938  | -0.4332321 |
| C | -0.9817302 | 2.7598123  | -0.3997986 |
| O | -0.2946602 | 3.6825100  | -0.8642747 |
| C | -0.9995673 | -0.3414816 | -0.9305982 |
| C | 0.4378287  | -0.2111636 | -0.5428886 |
| C | 0.9025166  | 0.3361591  | 0.6635187  |
| C | 2.2571233  | 0.3242511  | 0.9698559  |
| C | 3.1698360  | -0.2494180 | 0.0763989  |
| C | 2.7276983  | -0.7979497 | -1.1327308 |
| C | 1.3728383  | -0.7705332 | -1.4310108 |
| O | -1.0985971 | 2.7359195  | 0.9863201  |
| C | -2.3595878 | 0.6388657  | 1.0865036  |
| C | -2.2761531 | 2.1036776  | 1.4884631  |
| S | -1.2901157 | -2.5055560 | -0.4932211 |
| C | -0.4469812 | -2.7534612 | 1.0838666  |
| C | -3.0147644 | -2.6074566 | 0.0308860  |
| C | 4.5704512  | -0.2687357 | 0.4003967  |
| N | 5.6987805  | -0.2855094 | 0.6621154  |
| H | -1.6862234 | 1.8180187  | -2.1836910 |
| H | -3.0606607 | 0.1110610  | -0.9054463 |
| H | -1.0979052 | -0.5172970 | -2.0008562 |
| H | 0.2246166  | 0.8017618  | 1.3651520  |
| H | 2.6086414  | 0.7567777  | 1.9008845  |
| H | 3.4377260  | -1.2340295 | -1.8275085 |
| H | 1.0305722  | -1.1914128 | -2.3729882 |
| H | -1.6383694 | 0.0491912  | 1.6572851  |
| H | -3.3520603 | 0.2698249  | 1.3631547  |
| H | -2.2391399 | 2.2128116  | 2.5749743  |
| H | -3.1546711 | 2.6446943  | 1.1139793  |
| H | -0.7081362 | -3.7467353 | 1.4557892  |
| H | 0.6281409  | -2.7054912 | 0.8996388  |
| H | -0.7428574 | -1.9896976 | 1.8055351  |

|   |            |            |            |
|---|------------|------------|------------|
| H | -3.2132985 | -3.6295112 | 0.3608199  |
| H | -3.6409580 | -2.3769226 | -0.8326351 |
| H | -3.2103492 | -1.9068680 | 0.8440769  |

5a\_sy\_c\_2.log

E = -1184.836086  
H = -1184.524042  
G = -1184.590896

NImag=0

|   |            |            |            |
|---|------------|------------|------------|
| C | -0.7942905 | 3.0833900  | -2.3805431 |
| C | -0.9785269 | 2.5522794  | -0.9787234 |
| C | -0.5359710 | 2.3022349  | -3.5015098 |
| O | -0.4830967 | 2.6685144  | -4.6984709 |
| C | -2.2632061 | 3.0734044  | -0.2648172 |
| C | -2.0572575 | 4.2601405  | 0.6472447  |
| C | -1.3201395 | 5.3743209  | 0.2256287  |
| C | -1.1371341 | 6.4591560  | 1.0729969  |
| C | -1.6934473 | 6.4273564  | 2.3580356  |
| C | -2.4264406 | 5.3191615  | 2.7954943  |
| C | -2.6055931 | 4.2426142  | 1.9338316  |
| O | -0.3151479 | 0.9299258  | -3.3177914 |
| C | -0.9813578 | 1.0180086  | -0.9935465 |
| C | 0.0396589  | 0.5294459  | -2.0002316 |
| S | -3.5111274 | 3.5861268  | -1.5368357 |
| C | -4.0268479 | 2.0344795  | -2.2993592 |
| C | -4.9521555 | 3.8829391  | -0.4851306 |
| C | -1.5062134 | 7.5494323  | 3.2395880  |
| N | -1.3567090 | 8.4526922  | 3.9486879  |
| H | -0.8536935 | 4.1522792  | -2.5596987 |
| H | -0.1610341 | 2.8713589  | -0.3121769 |
| H | -2.7553187 | 2.2719595  | 0.2985273  |
| H | -0.8800366 | 5.3985335  | -0.7669326 |
| H | -0.5676065 | 7.3234569  | 0.7481293  |
| H | -2.8488537 | 5.3046283  | 3.7946686  |
| H | -3.1746996 | 3.3786178  | 2.2651235  |
| H | -1.9638116 | 0.6305674  | -1.2864712 |
| H | -0.7567483 | 0.6250900  | 0.0039601  |
| H | 0.0935625  | -0.5624013 | -2.0170923 |
| H | 1.0379267  | 0.9215265  | -1.7532192 |
| H | -4.9238678 | 2.2610842  | -2.8798192 |
| H | -3.2231933 | 1.7050073  | -2.9576353 |
| H | -4.2452327 | 1.2985145  | -1.5231016 |
| H | -5.8103580 | 3.9900553  | -1.1517778 |
| H | -4.7922965 | 4.8159582  | 0.0565029  |
| H | -5.0984349 | 3.0470410  | 0.2020649  |

5a\_sy\_c\_2\_r.log

E = -1184.834393  
H = -1184.522518  
G = -1184.590452

NImag=0

|   |            |            |            |
|---|------------|------------|------------|
| C | -0.5709580 | -1.8568099 | 0.0273557  |
| C | -1.2588705 | -0.6466881 | 0.6056121  |
| C | -1.1575888 | -2.7600218 | -0.8482246 |
| O | -0.6208545 | -3.7310248 | -1.4332162 |
| C | -0.2845081 | 0.5615338  | 0.5643531  |
| C | 0.2300287  | 0.9771907  | -0.7954943 |
| C | -0.5369155 | 1.7237953  | -1.6987988 |
| C | -0.0267625 | 2.0659373  | -2.9464720 |
| C | 1.2640682  | 1.6576299  | -3.2958124 |



|   |            |            |            |
|---|------------|------------|------------|
| C | 2.0476506  | 0.9197195  | -2.4007795 |
| C | 1.5273152  | 0.5923510  | -1.1552039 |
| O | -2.5234577 | -2.6105198 | -1.1434929 |
| C | -2.5834137 | -0.4131590 | -0.1180631 |
| C | -3.2667240 | -1.7596829 | -0.2843229 |
| S | -1.0547466 | 2.0482996  | 1.3514312  |
| C | -1.4090457 | 1.4804773  | 3.0251578  |
| C | 0.3955426  | 3.0793585  | 1.6443035  |
| C | 1.7965050  | 2.0099627  | -4.5852192 |
| N | 2.2254698  | 2.2941002  | -5.6227064 |
| H | 0.4715492  | -2.0320169 | 0.2776849  |
| H | -1.4829551 | -0.7872588 | 1.6751675  |
| H | 0.5688252  | 0.3286398  | 1.2125422  |
| H | -1.5399481 | 2.0523823  | -1.4430547 |
| H | -0.6227703 | 2.6447310  | -3.6440711 |
| H | 3.0511038  | 0.6144099  | -2.6779906 |
| H | 2.1335348  | 0.0286851  | -0.4523488 |
| H | -2.4162850 | 0.0029548  | -1.1176753 |
| H | -3.2402638 | 0.2709354  | 0.4339228  |
| H | -4.2531272 | -1.6493077 | -0.7426028 |
| H | -3.3933541 | -2.2426916 | 0.6967615  |
| H | -1.5663739 | 2.3774059  | 3.6282282  |
| H | -2.3244551 | 0.8886061  | 3.0010524  |
| H | -0.5659100 | 0.8991615  | 3.4036172  |
| H | 0.0687840  | 3.9325722  | 2.2415918  |
| H | 0.7612595  | 3.4225622  | 0.6751558  |
| H | 1.1546464  | 2.4976660  | 2.1710207  |

5a\_sy\_c\_2\_ts1.log

E = -1184.806709

H = -1184.497300

G = -1184.564583

NImag=1

|   |            |            |            |
|---|------------|------------|------------|
| C | -1.6154845 | -1.2658255 | -0.9170827 |
| C | -1.0798492 | -1.2460797 | 0.3715152  |
| C | -3.0112021 | -1.0472853 | -1.1654059 |
| O | -3.5259734 | -0.7686364 | -2.2455841 |
| C | -0.1013088 | 0.6478734  | 0.8096527  |
| C | 1.2722288  | 0.3694850  | 0.4655564  |
| C | 1.7860846  | 0.4511626  | -0.8514644 |
| C | 3.0809634  | 0.0528755  | -1.1428018 |
| C | 3.9091953  | -0.4501986 | -0.1284446 |
| C | 3.4165876  | -0.5535101 | 1.1848381  |
| C | 2.1251986  | -0.1521901 | 1.4700094  |
| O | -3.8629740 | -1.1681771 | -0.0910669 |
| C | -2.0553923 | -1.3698970 | 1.5326678  |
| C | -3.3715196 | -1.9280223 | 1.0237746  |
| S | -0.9390319 | 1.7650449  | -0.2565417 |
| C | -2.5412653 | 1.9468753  | 0.5429584  |
| C | -0.2383205 | 3.4007175  | 0.0786157  |
| C | 5.2483701  | -0.8559491 | -0.4287223 |
| N | 6.3344903  | -1.1858266 | -0.6705730 |
| H | -0.9746001 | -1.3158294 | -1.7914396 |
| H | -0.0970392 | -1.6871425 | 0.5132710  |
| H | -0.3070986 | 0.8569185  | 1.8593157  |
| H | 1.1714819  | 0.8329415  | -1.6624941 |
| H | 3.4572906  | 0.1294477  | -2.1582443 |
| H | 4.0543411  | -0.9446890 | 1.9715834  |
| H | 1.7517751  | -0.2337858 | 2.4872272  |
| H | -2.2325185 | -0.4058945 | 2.0180756  |
| H | -1.6485809 | -2.0398200 | 2.2968048  |

|   |            |            |            |
|---|------------|------------|------------|
| H | -4.1528291 | -1.8750559 | 1.7842998  |
| H | -3.2546183 | -2.9717920 | 0.7078279  |
| H | -3.0416701 | 2.7881737  | 0.0601139  |
| H | -3.1195601 | 1.0364147  | 0.3844492  |
| H | -2.3941762 | 2.1429666  | 1.6072131  |
| H | -0.8039084 | 4.1341637  | -0.5006427 |
| H | 0.8003681  | 3.3827790  | -0.2565432 |
| H | -0.2976502 | 3.6100483  | 1.1480306  |

5a\_sy\_c\_2\_ts2.log

E = -1184.819665  
H = -1184.509342  
G = -1184.577333

NImag=1

|   |            |            |            |
|---|------------|------------|------------|
| C | 2.1201816  | 0.9444857  | 0.9889562  |
| C | 2.1952192  | -0.2568815 | 0.0781039  |
| C | 1.5202659  | 2.1370055  | 0.5444551  |
| O | 1.1179543  | 3.0924154  | 1.2243591  |
| C | 0.8649657  | -0.7750081 | 0.5319090  |
| C | -0.4564612 | -0.1158792 | 0.2932240  |
| C | -0.9198711 | 0.2579657  | -0.9763215 |
| C | -2.1891587 | 0.8008224  | -1.1341381 |
| C | -3.0141760 | 0.9695886  | -0.0164461 |
| C | -2.5743183 | 0.5905885  | 1.2578371  |
| C | -1.3061214 | 0.0449268  | 1.3986604  |
| O | 1.3542353  | 2.2524381  | -0.8306401 |
| C | 2.3794547  | 0.0853000  | -1.4090533 |
| C | 2.3462197  | 1.5945988  | -1.6221697 |
| S | 0.5092705  | -2.7391767 | -0.4249071 |
| C | 1.8681596  | -3.6465302 | 0.3435973  |
| C | -0.8683118 | -3.3003237 | 0.5988583  |
| C | -4.3289921 | 1.5286613  | -0.1800337 |
| N | -5.3885338 | 1.9780220  | -0.3117242 |
| H | 2.3269052  | 0.8320392  | 2.0463433  |
| H | 2.9637313  | -0.9588563 | 0.4112431  |
| H | 0.9238473  | -1.1914441 | 1.5395531  |
| H | -0.3040355 | 0.1232325  | -1.8568260 |
| H | -2.5434435 | 1.0882563  | -2.1185782 |
| H | -3.2201454 | 0.7203140  | 2.1198238  |
| H | -0.9582715 | -0.2522624 | 2.3842359  |
| H | 1.6320781  | -0.4189308 | -2.0274046 |
| H | 3.3538079  | -0.2813753 | -1.7471361 |
| H | 2.1167103  | 1.8445384  | -2.6608191 |
| H | 3.3255041  | 2.0229695  | -1.3730390 |
| H | 1.6744050  | -4.7171743 | 0.2518156  |
| H | 2.7844004  | -3.3962096 | -0.1936763 |
| H | 1.9575300  | -3.3669606 | 1.3965343  |
| H | -0.9727479 | -4.3815489 | 0.4871695  |
| H | -1.7738537 | -2.8069117 | 0.2407830  |
| H | -0.6849867 | -3.0425451 | 1.6455612  |

5a\_sy\_c\_3.log

E = -1184.836586  
H = -1184.524480  
G = -1184.590964

NImag=0

|   |            |           |            |
|---|------------|-----------|------------|
| C | -0.7579192 | 3.0580108 | -2.3642015 |
| C | -0.8581675 | 2.4200212 | -0.9998017 |
| C | -0.5043216 | 2.3727597 | -3.5503127 |
| O | -0.4775534 | 2.8419958 | -4.7114502 |

|   |            |            |            |
|---|------------|------------|------------|
| C | -2.0789117 | 2.8765360  | -0.1629952 |
| C | -1.9406336 | 4.1438316  | 0.6394393  |
| C | -1.1464779 | 5.2126422  | 0.2039933  |
| C | -1.0398665 | 6.3692034  | 0.9660182  |
| C | -1.7329218 | 6.4610952  | 2.1788831  |
| C | -2.5188472 | 5.3980529  | 2.6362514  |
| C | -2.6130488 | 4.2460693  | 1.8642971  |
| O | -0.2556352 | 0.9963149  | -3.4923283 |
| C | -0.9086864 | 0.8982021  | -1.1609809 |
| C | 0.0914813  | 0.4745756  | -2.2168761 |
| S | -3.5379068 | 2.9410393  | -1.3255078 |
| C | -4.9272305 | 2.8211735  | -0.1756198 |
| C | -3.7354216 | 4.6640885  | -1.8216614 |
| C | -1.6253138 | 7.6587865  | 2.9695235  |
| N | -1.5399684 | 8.6228061  | 3.6054633  |
| H | -0.8267971 | 4.1349315  | -2.4692912 |
| H | 0.0032765  | 2.6591250  | -0.3527889 |
| H | -2.3810264 | 2.0728841  | 0.5203138  |
| H | -0.5981643 | 5.1463684  | -0.7291626 |
| H | -0.4230804 | 7.1955757  | 0.6288153  |
| H | -3.0388669 | 5.4726128  | 3.5854253  |
| H | -3.2054282 | 3.4093673  | 2.2246372  |
| H | -1.9082570 | 0.5799944  | -1.4885161 |
| H | -0.6944911 | 0.4008876  | -0.2088542 |
| H | 0.1182136  | -0.6125692 | -2.3288879 |
| H | 1.1002338  | 0.8178768  | -1.9408976 |
| H | -5.8374505 | 2.8564033  | -0.7774739 |
| H | -4.8593069 | 1.8602243  | 0.3369918  |
| H | -4.9115933 | 3.6496641  | 0.5347355  |
| H | -4.6725286 | 4.7070179  | -2.3814806 |
| H | -2.9000203 | 4.9326439  | -2.4661740 |
| H | -3.7871621 | 5.3035876  | -0.9386254 |

5a\_sy\_c\_3\_r.log

E = -1184.831011

H = -1184.518828

G = -1184.585385

NImag=0

|   |            |            |            |
|---|------------|------------|------------|
| C | 0.9425612  | -1.7907646 | -0.1288788 |
| C | 1.4537413  | -0.5341159 | -0.7824509 |
| C | 1.7040742  | -2.6390952 | 0.6630351  |
| O | 1.3244799  | -3.6425487 | 1.3126683  |
| C | 0.3727077  | 0.5760357  | -0.6776432 |
| C | -0.3147224 | 0.8554146  | 0.6368904  |
| C | 0.3703867  | 1.0527012  | 1.8444660  |
| C | -0.3244283 | 1.2964403  | 3.0218610  |
| C | -1.7235885 | 1.3470556  | 3.0002291  |
| C | -2.4254213 | 1.1560433  | 1.8067389  |
| C | -1.7146574 | 0.9131107  | 0.6367494  |
| O | 3.0805910  | -2.3796494 | 0.7809819  |
| C | 2.8461618  | -0.1927285 | -0.2449155 |
| C | 3.6376483  | -1.4875956 | -0.1719799 |
| S | 1.0248164  | 2.1181244  | -1.4888155 |
| C | -0.4750788 | 3.0677575  | -1.7988006 |
| C | 1.7768101  | 3.1101723  | -0.1853703 |
| C | -2.4457031 | 1.6004113  | 4.2188621  |
| N | -3.0270658 | 1.8062117  | 5.1990303  |
| H | -0.1089624 | -2.0423618 | -0.2374991 |
| H | 1.5739651  | -0.6577170 | -1.8735879 |
| H | -0.4076479 | 0.3019145  | -1.3977733 |
| H | 1.4524510  | 1.0220127  | 1.8811565  |

|   |            |            |            |
|---|------------|------------|------------|
| H | 0.2101493  | 1.4454982  | 3.9540542  |
| H | -3.5096038 | 1.1956270  | 1.7976410  |
| H | -2.2581265 | 0.7579328  | -0.2914366 |
| H | 2.8121248  | 0.2357391  | 0.7606844  |
| H | 3.3692142  | 0.5160281  | -0.8993806 |
| H | 4.6674188  | -1.3042349 | 0.1458620  |
| H | 3.6612971  | -1.9693163 | -1.1615430 |
| H | -0.1661409 | 4.0178005  | -2.2392237 |
| H | -1.0811612 | 2.5060093  | -2.5115439 |
| H | -1.0114547 | 3.2326786  | -0.8623726 |
| H | 2.1333792  | 4.0214732  | -0.6704844 |
| H | 2.6209364  | 2.5577722  | 0.2291118  |
| H | 1.0371856  | 3.3462541  | 0.5808424  |

5a\_sy\_c\_3\_ts1.log

E = -1184.805021

H = -1184.495029

G = -1184.561146

NImag=1

|   |            |            |            |
|---|------------|------------|------------|
| C | 1.2295605  | -1.6131836 | 0.0002454  |
| C | 1.2744099  | -0.8445583 | -1.1652721 |
| C | 2.3468253  | -1.7094239 | 0.8901663  |
| O | 2.3210148  | -2.0901852 | 2.0586543  |
| C | 0.2440933  | 1.0004136  | -0.9874286 |
| C | -1.0847142 | 0.5713474  | -0.5928706 |
| C | -1.4473292 | 0.2671376  | 0.7373177  |
| C | -2.6998487 | -0.2463698 | 1.0412182  |
| C | -3.6233453 | -0.4924122 | 0.0163727  |
| C | -3.2765148 | -0.2238341 | -1.3184057 |
| C | -2.0291654 | 0.2994669  | -1.6097730 |
| O | 3.5766669  | -1.3422256 | 0.3934047  |
| C | 2.6525965  | -0.4334283 | -1.6678773 |
| C | 3.7038285  | -1.3260711 | -1.0353316 |
| S | 1.1334315  | 2.1875690  | -0.0481995 |
| C | -0.0390505 | 3.2770087  | 0.8026730  |
| C | 1.9262631  | 1.4063356  | 1.3826061  |
| C | -4.9173098 | -1.0233329 | 0.3290686  |
| N | -5.9651295 | -1.4525374 | 0.5809197  |
| H | 0.3021736  | -2.0582967 | 0.3442896  |
| H | 0.5281457  | -1.0548469 | -1.9279364 |
| H | 0.3256657  | 1.3244759  | -2.0242361 |
| H | -0.7477775 | 0.4221418  | 1.5510476  |
| H | -2.9630181 | -0.4679815 | 2.0707853  |
| H | -3.9899020 | -0.4187463 | -2.1129598 |
| H | -1.7685332 | 0.5153150  | -2.6424232 |
| H | 2.8870627  | 0.6100504  | -1.4321474 |
| H | 2.7022238  | -0.5259800 | -2.7572631 |
| H | 4.7136451  | -0.9645847 | -1.2384270 |
| H | 3.6138259  | -2.3541495 | -1.4062054 |
| H | 0.5509726  | 4.0391092  | 1.3159107  |
| H | -0.6618088 | 3.7387624  | 0.0350984  |
| H | -0.6469526 | 2.7181105  | 1.5142956  |
| H | 2.7671706  | 0.8127457  | 1.0232162  |
| H | 1.2308321  | 0.7994846  | 1.9602970  |
| H | 2.3018577  | 2.2352567  | 1.9873158  |

5a\_sy\_c\_3\_ts2.log

E = -1184.818810

H = -1184.508198

G = -1184.575771

NImag=1

|   |            |            |            |
|---|------------|------------|------------|
| C | 2.2481037  | -0.7816327 | -1.3228486 |
| C | 2.2925224  | 0.4243879  | -0.4203418 |
| C | 1.9098508  | -2.0527269 | -0.8275007 |
| O | 1.5463844  | -3.0522053 | -1.4662451 |
| C | 0.8944301  | 0.8608994  | -0.7365878 |
| C | -0.3659525 | 0.1413977  | -0.4053547 |
| C | -0.5835717 | -0.5996589 | 0.7692541  |
| C | -1.8202588 | -1.1766514 | 1.0226106  |
| C | -2.8685152 | -1.0084993 | 0.1092740  |
| C | -2.6763433 | -0.2699699 | -1.0634724 |
| C | -1.4319742 | 0.2940742  | -1.3089819 |
| O | 1.9984319  | -2.2145121 | 0.5506281  |
| C | 2.6394014  | 0.1071184  | 1.0461281  |
| C | 2.9505523  | -1.3749243 | 1.2071358  |
| S | 0.6353109  | 2.8530850  | 0.2640823  |
| C | -0.4325189 | 3.6876564  | -0.9281416 |
| C | -0.5492706 | 2.5729009  | 1.5968735  |
| C | -4.1512132 | -1.5991863 | 0.3797847  |
| N | -5.1851166 | -2.0736401 | 0.5984303  |
| H | 2.2710341  | -0.6417240 | -2.3971558 |
| H | 2.9675808  | 1.1920982  | -0.8098682 |
| H | 0.8393600  | 1.3030756  | -1.7323652 |
| H | 0.2046167  | -0.7414112 | 1.4952521  |
| H | -1.9789483 | -1.7504365 | 1.9297629  |
| H | -3.4890642 | -0.1466249 | -1.7713838 |
| H | -1.2752550 | 0.8564614  | -2.2253400 |
| H | 1.8389409  | 0.4136214  | 1.7260640  |
| H | 3.5264008  | 0.6742760  | 1.3446842  |
| H | 2.9400695  | -1.6713615 | 2.2587845  |
| H | 3.9456537  | -1.5895963 | 0.7968699  |
| H | -0.7314761 | 4.6548808  | -0.5187343 |
| H | 0.1425995  | 3.8389236  | -1.8433838 |
| H | -1.3155311 | 3.0768610  | -1.1313835 |
| H | -0.8082816 | 3.5396160  | 2.0346373  |
| H | -0.0702061 | 1.9468646  | 2.3523777  |
| H | -1.4446035 | 2.0816609  | 1.2081323  |

5a\_sy\_c\_4.log

E = -1184.837415  
H = -1184.525426  
G = -1184.592573

NImag=0

|   |            |           |            |
|---|------------|-----------|------------|
| C | -1.0362063 | 2.9067691 | -3.0728986 |
| C | -0.8023016 | 3.3947122 | -1.6715680 |
| C | -0.6338372 | 1.6719225 | -3.5687404 |
| O | -0.7237538 | 1.2547843 | -4.7474040 |
| C | -2.0815104 | 3.4778442 | -0.7774802 |
| C | -1.9697659 | 4.4617669 | 0.3585014  |
| C | -2.1405402 | 4.0199121 | 1.6740927  |
| C | -2.0194774 | 4.9048051 | 2.7399890  |
| C | -1.7342137 | 6.2496979 | 2.4808587  |
| C | -1.5660220 | 6.7088392 | 1.1681450  |
| C | -1.6791999 | 5.8111415 | 0.1148991  |
| O | -0.0348591 | 0.7578614 | -2.6930585 |
| C | 0.1899876  | 2.4636170 | -0.9654509 |
| C | -0.1529882 | 1.0222217 | -1.3025000 |
| S | -3.5419988 | 3.9146615 | -1.8413083 |
| C | -4.1837389 | 2.2898633 | -2.3035974 |
| C | -4.7933416 | 4.3647006 | -0.6173637 |
| C | -1.6135129 | 7.1743009 | 3.5769991  |

|   |            |           |            |
|---|------------|-----------|------------|
| N | -1.5169520 | 7.9182791 | 4.4591994  |
| H | -1.4485075 | 3.5954285 | -3.8052951 |
| H | -0.3839057 | 4.4094101 | -1.6872608 |
| H | -2.3465312 | 2.4900475 | -0.3848288 |
| H | -2.3677776 | 2.9750796 | 1.8652737  |
| H | -2.1471612 | 4.5616953 | 3.7612828  |
| H | -1.3482056 | 7.7550751 | 0.9817466  |
| H | -1.5491304 | 6.1720112 | -0.9023658 |
| H | 0.1760555  | 2.6025082 | 0.1224319  |
| H | 1.2040512  | 2.6812245 | -1.3185571 |
| H | -1.1772180 | 0.7834850 | -0.9759803 |
| H | 0.5271366  | 0.3276150 | -0.8020580 |
| H | -5.1363668 | 2.4568765 | -2.8110650 |
| H | -3.4587019 | 1.8343494 | -2.9768845 |
| H | -4.3219128 | 1.6937985 | -1.3989228 |
| H | -5.7458726 | 4.4086697 | -1.1495643 |
| H | -4.5509555 | 5.3486066 | -0.2152254 |
| H | -4.8264642 | 3.6118189 | 0.1730586  |

5a\_sy\_c\_4\_r.log

E = -1184.834335

H = -1184.522327

G = -1184.588764

NImag=0

|   |            |            |            |
|---|------------|------------|------------|
| C | -0.5020013 | -0.9375907 | -1.7883142 |
| C | -1.2326735 | -0.5895317 | -0.5215906 |
| C | -1.0414735 | -0.8854674 | -3.0685092 |
| O | -0.5411324 | -1.3240580 | -4.1314487 |
| C | -0.4029662 | 0.4541993  | 0.2962896  |
| C | -0.4070326 | 1.8673546  | -0.2315168 |
| C | 0.6264409  | 2.2454384  | -1.0963526 |
| C | 0.6313185  | 3.5021440  | -1.6903560 |
| C | -0.4015331 | 4.3999797  | -1.3991255 |
| C | -1.4288515 | 4.0466181  | -0.5164539 |
| C | -1.4266862 | 2.7827454  | 0.0597599  |
| O | -2.3022595 | -0.2989315 | -3.2362784 |
| C | -2.6693228 | -0.1558155 | -0.8375469 |
| C | -2.7391855 | 0.5490139  | -2.1851136 |
| S | -0.9688169 | 0.4753105  | 2.0630208  |
| C | -0.4690442 | -1.1592625 | 2.6423617  |
| C | 0.3071870  | 1.4903779  | 2.8371478  |
| C | -0.4021383 | 5.7061122  | -2.0025867 |
| N | -0.4029656 | 6.7577717  | -2.4876032 |
| H | 0.4678880  | -1.4193336 | -1.6972461 |
| H | -1.2850293 | -1.4732964 | 0.1302319  |
| H | 0.6286710  | 0.0891236  | 0.3591108  |
| H | 1.4290799  | 1.5465231  | -1.3097456 |
| H | 1.4281660  | 3.7897759  | -2.3681594 |
| H | -2.2206215 | 4.7532689  | -0.2911280 |
| H | -2.2423405 | 2.5204038  | 0.7284033  |
| H | -3.0981606 | 0.4848864  | -0.0575173 |
| H | -3.2981234 | -1.0514917 | -0.8927670 |
| H | -2.1326483 | 1.4644641  | -2.1875243 |
| H | -3.7708134 | 0.8239100  | -2.4226970 |
| H | -0.4378315 | -1.1035523 | 3.7323922  |
| H | -1.2210901 | -1.8848359 | 2.3342972  |
| H | 0.5148499  | -1.4045675 | 2.2374448  |
| H | 0.1796275  | 1.3950708  | 3.9170165  |
| H | 0.1476498  | 2.5259189  | 2.5345614  |
| H | 1.2910164  | 1.1332234  | 2.5254483  |

5a\_sy\_c\_4\_ts1.log

E = -1184.810520

H = -1184.501292

G = -1184.568525

NImag=1

|   |            |            |            |
|---|------------|------------|------------|
| C | -2.3164862 | -0.6772083 | -1.2422920 |
| C | -1.1461938 | -1.0394873 | -0.5813666 |
| C | -3.6216091 | -1.0327895 | -0.7576205 |
| O | -4.6744907 | -0.8519503 | -1.3667138 |
| C | -0.1661820 | 0.5516897  | 0.5608374  |
| C | 1.2294464  | 0.2780316  | 0.3253028  |
| C | 1.9531842  | -0.4753510 | 1.2826503  |
| C | 3.2615815  | -0.8626656 | 1.0578485  |
| C | 3.9033017  | -0.5059477 | -0.1410197 |
| C | 3.2066008  | 0.2355791  | -1.1081367 |
| C | 1.8943878  | 0.6137047  | -0.8803973 |
| O | -3.7215739 | -1.6730452 | 0.4482118  |
| C | -1.3020091 | -2.0189082 | 0.5524119  |
| C | -2.5713743 | -1.6835717 | 1.3081080  |
| S | -0.8317323 | 1.9832853  | -0.2180023 |
| C | -2.4058241 | 2.1486112  | 0.6404369  |
| C | 0.0440770  | 3.4063328  | 0.4816879  |
| C | 5.2604350  | -0.8951354 | -0.3746285 |
| N | 6.3610218  | -1.2112697 | -0.5639757 |
| H | -2.2946711 | -0.1561579 | -2.1932590 |
| H | -0.2322024 | -1.0956514 | -1.1700533 |
| H | -0.5041851 | 0.4793797  | 1.5943529  |
| H | 1.4696306  | -0.7423734 | 2.2183257  |
| H | 3.7994350  | -1.4336380 | 1.8084802  |
| H | 3.6990041  | 0.5083306  | -2.0365741 |
| H | 1.3775107  | 1.1771652  | -1.6537144 |
| H | -0.4481898 | -2.0011181 | 1.2360192  |
| H | -1.3709809 | -3.0338623 | 0.1379350  |
| H | -2.4826499 | -0.6978010 | 1.7832217  |
| H | -2.7928608 | -2.4222847 | 2.0803332  |
| H | -2.8563122 | 3.0875688  | 0.3145188  |
| H | -3.0363705 | 1.3103744  | 0.3465452  |
| H | -2.2237968 | 2.1538127  | 1.7171893  |
| H | -0.4355466 | 4.3130195  | 0.1056006  |
| H | 1.0773536  | 3.3608676  | 0.1325310  |
| H | -0.0009776 | 3.3567856  | 1.5710187  |

5a\_sy\_c\_4\_ts2.log

E = -1184.819506

H = -1184.508880

G = -1184.576287

NImag=1

|   |            |            |            |
|---|------------|------------|------------|
| C | -2.2338731 | 0.9585539  | -0.9181368 |
| C | -2.1460508 | -0.0648298 | 0.1808162  |
| C | -2.2023202 | 2.3558682  | -0.7104909 |
| O | -2.4159711 | 3.2205408  | -1.5738299 |
| C | -0.9084286 | -0.6689941 | -0.3961163 |
| C | 0.4942053  | -0.1780590 | -0.2287295 |
| C | 1.2397265  | 0.1150559  | -1.3775945 |
| C | 2.5729312  | 0.4949045  | -1.2858539 |
| C | 3.1771578  | 0.5631110  | -0.0254577 |
| C | 2.4546360  | 0.2495063  | 1.1326012  |
| C | 1.1218698  | -0.1241009 | 1.0242940  |
| O | -1.9755121 | 2.8386262  | 0.5618609  |
| C | -2.1002580 | 0.5972861  | 1.5531213  |

|   |            |            |            |
|---|------------|------------|------------|
| C | -1.3994975 | 1.9491854  | 1.5173164  |
| S | -0.6782069 | -2.7341243 | 0.4891317  |
| C | -2.1309089 | -3.4866331 | -0.2748894 |
| C | 0.6034643  | -3.3231701 | -0.6398125 |
| C | 4.5592310  | 0.9473171  | 0.0814731  |
| N | 5.6721908  | 1.2559523  | 0.1678228  |
| H | -2.5432942 | 0.6368695  | -1.9055359 |
| H | -2.9600691 | -0.7993076 | 0.1529129  |
| H | -1.0850362 | -1.0898542 | -1.3870176 |
| H | 0.7637919  | 0.0513971  | -2.3519060 |
| H | 3.1436096  | 0.7309507  | -2.1778186 |
| H | 2.9372710  | 0.2918206  | 2.1032443  |
| H | 0.5737163  | -0.3807386 | 1.9257136  |
| H | -1.6254650 | -0.0448817 | 2.3031921  |
| H | -3.1349680 | 0.7578731  | 1.8748064  |
| H | -0.3329089 | 1.8510611  | 1.2966545  |
| H | -1.4973687 | 2.4498936  | 2.4835367  |
| H | -1.9880706 | -4.5683727 | -0.3183366 |
| H | -2.9969429 | -3.2601153 | 0.3486840  |
| H | -2.2748075 | -3.0853680 | -1.2819420 |
| H | 0.6290821  | -4.4142729 | -0.6091237 |
| H | 1.5613762  | -2.9258592 | -0.2985879 |
| H | 0.3932225  | -2.9782358 | -1.6563734 |

5a\_sy\_c\_5.log

E = -1184.835094

H = -1184.523116

G = -1184.589431

NImag=0

|   |            |            |            |
|---|------------|------------|------------|
| C | -0.5454705 | 3.0681390  | -2.4205237 |
| C | -0.5647981 | 2.5633528  | -1.0029290 |
| C | -0.5862987 | 2.2558211  | -3.5495459 |
| O | -0.4934531 | 2.6115156  | -4.7471348 |
| C | -1.8889331 | 2.8732309  | -0.2260061 |
| C | -1.8611013 | 4.1061262  | 0.6390456  |
| C | -1.1877240 | 5.2644801  | 0.2263379  |
| C | -1.1670316 | 6.3943885  | 1.0326718  |
| C | -1.8227068 | 6.3667482  | 2.2703747  |
| C | -2.4922670 | 5.2171947  | 2.7013484  |
| C | -2.5064927 | 4.0944449  | 1.8809064  |
| O | -0.7344760 | 0.8713824  | -3.3915064 |
| C | -0.2649139 | 1.0608139  | -1.0039658 |
| C | -1.0480073 | 0.3638252  | -2.1007333 |
| S | -3.2830092 | 2.9449797  | -1.4606385 |
| C | -4.7210726 | 2.8135321  | -0.3712577 |
| C | -3.4668275 | 4.6671801  | -1.9618041 |
| C | -1.8006316 | 7.5339081  | 3.1119766  |
| N | -1.7841494 | 8.4733330  | 3.7889769  |
| H | -0.3947660 | 4.1266790  | -2.6092394 |
| H | 0.2140756  | 3.0541308  | -0.4045175 |
| H | -2.1935091 | 2.0191379  | 0.3920397  |
| H | -0.6757335 | 5.2882996  | -0.7311829 |
| H | -0.6472752 | 7.2913945  | 0.7129282  |
| H | -2.9884082 | 5.2038559  | 3.6660060  |
| H | -3.0162683 | 3.1943462  | 2.2136579  |
| H | -0.4989239 | 0.6012620  | -0.0374025 |
| H | 0.8053251  | 0.9186570  | -1.1922406 |
| H | -2.1301991 | 0.4512007  | -1.9234149 |
| H | -0.8110157 | -0.7035991 | -2.1308169 |
| H | -5.6051081 | 2.8781223  | -1.0086168 |
| H | -4.6877657 | 1.8368438  | 0.1147361  |



|   |            |           |            |
|---|------------|-----------|------------|
| H | -4.7237874 | 3.6196727 | 0.3648671  |
| H | -4.3405389 | 4.6924812 | -2.6172762 |
| H | -2.5732433 | 4.9559390 | -2.5131594 |
| H | -3.6263937 | 5.2983797 | -1.0861609 |

5a\_sy\_c\_5\_r.log

E = -1184.829238  
H = -1184.516871  
G = -1184.582795

NImag=0

|   |            |            |            |
|---|------------|------------|------------|
| C | 0.5072507  | -2.0535084 | -0.3605064 |
| C | 1.3310969  | -0.8558126 | -0.7548728 |
| C | 0.9219911  | -3.0763308 | 0.4865424  |
| O | 0.3616145  | -4.1786971 | 0.6905824  |
| C | 0.4497656  | 0.4187675  | -0.5903397 |
| C | 0.0825927  | 0.9346374  | 0.7778894  |
| C | 1.0292373  | 1.3888227  | 1.7072222  |
| C | 0.6309226  | 1.8564508  | 2.9536739  |
| C | -0.7296196 | 1.8702781  | 3.2815738  |
| C | -1.6890672 | 1.4206113  | 2.3691228  |
| C | -1.2747801 | 0.9623341  | 1.1243311  |
| O | 2.1073751  | -2.8987307 | 1.2093900  |
| C | 2.6839753  | -0.8928085 | -0.0306947 |
| C | 2.5582678  | -1.5585772 | 1.3317923  |
| S | 1.0388516  | 1.7766930  | -1.7371781 |
| C | -0.3617428 | 2.9114961  | -1.7085877 |
| C | 2.2775968  | 2.7857860  | -0.9035388 |
| C | -1.1460601 | 2.3555159  | 4.5706420  |
| N | -1.4824219 | 2.7474808  | 5.6070673  |
| H | -0.4009271 | -2.2455960 | -0.9261680 |
| H | 1.5433621  | -0.8782515 | -1.8361392 |
| H | -0.4824303 | 0.1796514  | -1.1175268 |
| H | 2.0889799  | 1.3758454  | 1.4754738  |
| H | 1.3669184  | 2.2062331  | 3.6698262  |
| H | -2.7416202 | 1.4331748  | 2.6316083  |
| H | -2.0171945 | 0.6164176  | 0.4106385  |
| H | 3.1475716  | 0.0928288  | 0.0724469  |
| H | 3.3713408  | -1.4993825 | -0.6314406 |
| H | 1.8658421  | -1.0084274 | 1.9818975  |
| H | 3.5309060  | -1.6062498 | 1.8297359  |
| H | -0.1073691 | 3.7507691  | -2.3585569 |
| H | -1.2278021 | 2.3809710  | -2.1079206 |
| H | -0.5424822 | 3.2539262  | -0.6876947 |
| H | 2.5250187  | 3.5834216  | -1.6079463 |
| H | 3.1636728  | 2.1783630  | -0.7187895 |
| H | 1.8718813  | 3.2055401  | 0.0173457  |

5a\_sy\_c\_5\_ts1.log

E = -1184.807181  
H = -1184.497337  
G = -1184.564958

NImag=1

|   |            |            |            |
|---|------------|------------|------------|
| C | 2.7794356  | -0.1661831 | 0.9509421  |
| C | 1.4756284  | -0.6383471 | 0.8481791  |
| C | 3.9029313  | -0.8493312 | 0.3700346  |
| O | 5.0798732  | -0.5392702 | 0.5441779  |
| C | 0.2594832  | 0.4563185  | -0.6134900 |
| C | -1.1349002 | 0.1734806  | -0.3635699 |
| C | -1.8833304 | 0.7484363  | 0.6913284  |
| C | -3.1905835 | 0.3616353  | 0.9413221  |

|   |            |            |            |
|---|------------|------------|------------|
| C | -3.7960277 | -0.6282353 | 0.1532242  |
| C | -3.0699930 | -1.2273150 | -0.8908922 |
| C | -1.7697167 | -0.8292266 | -1.1399463 |
| O | 3.6755499  | -1.9712230 | -0.3786398 |
| C | 1.3143591  | -2.0145718 | 0.2580276  |
| C | 2.3391489  | -2.2118821 | -0.8401497 |
| S | 0.9389065  | 2.0652400  | -0.5204881 |
| C | -0.2155631 | 3.2121258  | -1.3118659 |
| C | 0.8514549  | 2.6848296  | 1.1844685  |
| C | -5.1455211 | -1.0289036 | 0.4143192  |
| N | -6.2391840 | -1.3545319 | 0.6253368  |
| H | 3.0267975  | 0.7174569  | 1.5301017  |
| H | 0.7459696  | -0.3427357 | 1.6007012  |
| H | 0.6654097  | 0.0157849  | -1.5218410 |
| H | -1.4406395 | 1.4992833  | 1.3358986  |
| H | -3.7465405 | 0.8185678  | 1.7541751  |
| H | -3.5359199 | -1.9926639 | -1.5038768 |
| H | -1.2193403 | -1.2870942 | -1.9577276 |
| H | 0.3097021  | -2.1786034 | -0.1417061 |
| H | 1.4732086  | -2.7543731 | 1.0543332  |
| H | 2.1372188  | -1.5378869 | -1.6822825 |
| H | 2.3387010  | -3.2379099 | -1.2121940 |
| H | 0.1672374  | 4.2241518  | -1.1606712 |
| H | -0.2344492 | 2.9706341  | -2.3756336 |
| H | -1.2076881 | 3.1032657  | -0.8695909 |
| H | 1.6449298  | 3.4277438  | 1.2833730  |
| H | 1.0260426  | 1.8627553  | 1.8774446  |
| H | -0.1185800 | 3.1480576  | 1.3655507  |

5a\_sy\_c\_5\_ts2.log

E = -1184.816684

H = -1184.505944

G = -1184.573704

NImag=1

|   |            |            |            |
|---|------------|------------|------------|
| C | 2.5504840  | -0.3908360 | -1.0159819 |
| C | 2.1290769  | 0.7033154  | -0.0738397 |
| C | 3.0216703  | -1.6596137 | -0.6104022 |
| O | 3.5372136  | -2.5117445 | -1.3498904 |
| C | 0.7658575  | 0.8262045  | -0.6784302 |
| C | -0.4507258 | 0.0180052  | -0.4004582 |
| C | -0.9501717 | -0.1991063 | 0.8931347  |
| C | -2.1439860 | -0.8815349 | 1.0863606  |
| C | -2.8565922 | -1.3521715 | -0.0232057 |
| C | -2.3827368 | -1.1343736 | -1.3222247 |
| C | -1.1921505 | -0.4430910 | -1.4993938 |
| O | 2.9694385  | -1.9932947 | 0.7274653  |
| C | 2.2933386  | 0.2674360  | 1.3794954  |
| C | 2.0890523  | -1.2321028 | 1.5514891  |
| S | 0.0589325  | 2.9541241  | -0.1986560 |
| C | -1.5239818 | 2.9708152  | -1.0660624 |
| C | -0.5254997 | 3.0358523  | 1.5075985  |
| C | -4.0937321 | -2.0588017 | 0.1746172  |
| N | -5.0901301 | -2.6273108 | 0.3337589  |
| H | 2.7293492  | -0.1373728 | -2.0545082 |
| H | 2.6699199  | 1.6452300  | -0.2340994 |
| H | 0.8298762  | 1.1180071  | -1.7262930 |
| H | -0.4160902 | 0.1698640  | 1.7615997  |
| H | -2.5265303 | -1.0455769 | 2.0882330  |
| H | -2.9446407 | -1.4977734 | -2.1761044 |
| H | -0.8222393 | -0.2614647 | -2.5045950 |
| H | 1.6279884  | 0.8173098  | 2.0536036  |

|   |            |            |            |
|---|------------|------------|------------|
| H | 3.3199975  | 0.5044438  | 1.6792565  |
| H | 1.0623194  | -1.5341745 | 1.3249877  |
| H | 2.3103237  | -1.5304962 | 2.5789844  |
| H | -1.9957826 | 3.9456858  | -0.9258100 |
| H | -1.3273906 | 2.8105355  | -2.1284234 |
| H | -2.1719036 | 2.1798411  | -0.6788665 |
| H | -0.9203987 | 4.0382989  | 1.6893839  |
| H | 0.3234338  | 2.8530105  | 2.1687828  |
| H | -1.3084267 | 2.2936227  | 1.6764709  |

5a\_sy\_c\_6.log

E = -1184.835378  
H = -1184.523405  
G = -1184.590568

NImag=0

|   |            |           |            |
|---|------------|-----------|------------|
| C | -1.3323604 | 2.3266005 | -2.8860449 |
| C | -1.0849943 | 3.1390121 | -1.6445567 |
| C | -0.6442245 | 1.1736433 | -3.2455939 |
| O | -0.8588697 | 0.4222935 | -4.2256338 |
| C | -2.3549011 | 3.3924883 | -0.7941699 |
| C | -2.1274573 | 4.3390018 | 0.3561125  |
| C | -1.6120109 | 5.6249753 | 0.1450373  |
| C | -1.3785895 | 6.4741130 | 1.2189466  |
| C | -1.6565943 | 6.0300284 | 2.5179956  |
| C | -2.1682055 | 4.7476027 | 2.7435531  |
| C | -2.4043504 | 3.9112017 | 1.6582439  |
| O | 0.4274801  | 0.7634859 | -2.4382584 |
| C | -0.0823462 | 2.4137482 | -0.7370519 |
| C | 0.9834245  | 1.7649612 | -1.5987093 |
| S | -3.7160699 | 4.0571195 | -1.8892730 |
| C | -4.6632619 | 2.5661324 | -2.2698896 |
| C | -4.8619485 | 4.8300764 | -0.7279462 |
| C | -1.4158860 | 6.9049737 | 3.6348996  |
| N | -1.2227524 | 7.6085854 | 4.5341799  |
| H | -2.0526040 | 2.6820682 | -3.6185937 |
| H | -0.6718808 | 4.1332675 | -1.8825744 |
| H | -2.7583568 | 2.4413372 | -0.4293731 |
| H | -1.3978984 | 5.9779654 | -0.8603244 |
| H | -0.9848751 | 7.4722284 | 1.0583606  |
| H | -2.3793614 | 4.4149279 | 3.7543696  |
| H | -2.8040427 | 2.9147880 | 1.8234274  |
| H | -0.5938971 | 1.6265342 | -0.1668025 |
| H | 0.3763362  | 3.1037724 | -0.0209799 |
| H | 1.7380347  | 1.2658871 | -0.9849471 |
| H | 1.4864919  | 2.5253738 | -2.2153621 |
| H | -5.5151914 | 2.8769676 | -2.8777348 |
| H | -4.0160240 | 1.8929274 | -2.8306577 |
| H | -4.9939339 | 2.1099574 | -1.3348335 |
| H | -5.7824772 | 5.0139787 | -1.2863568 |
| H | -4.4364872 | 5.7766394 | -0.3943262 |
| H | -5.0466145 | 4.1578358 | 0.1122675  |

5a\_sy\_c\_6\_ts1.log

E = -1184.806080  
H = -1184.496717  
G = -1184.564399

NImag=1

|   |            |            |            |
|---|------------|------------|------------|
| C | -2.4968061 | -0.5462128 | -1.1213624 |
| C | -1.1929055 | -0.8635373 | -0.7475852 |
| C | -3.6192727 | -0.9682782 | -0.3305767 |

|   |            |            |            |
|---|------------|------------|------------|
| O | -4.7385699 | -0.4593821 | -0.3388923 |
| C | -0.2444682 | 0.6501023  | 0.4881933  |
| C | 1.1546185  | 0.3565672  | 0.3148179  |
| C | 1.8754566  | 0.6949938  | -0.8579605 |
| C | 3.1878856  | 0.2912166  | -1.0374576 |
| C | 3.8297960  | -0.4747857 | -0.0522230 |
| C | 3.1340815  | -0.8276244 | 1.1187187  |
| C | 1.8268975  | -0.4159262 | 1.2958564  |
| O | -3.4214952 | -2.0224362 | 0.5193749  |
| C | -1.0092085 | -2.0538828 | 0.1814603  |
| C | -2.2935729 | -2.8598700 | 0.2237562  |
| S | -0.8487246 | 2.1209298  | -0.2714559 |
| C | -2.4367385 | 2.3230536  | 0.5568827  |
| C | 0.0575908  | 3.5010150  | 0.4740121  |
| C | 5.1866518  | -0.8895520 | -0.2362015 |
| N | 6.2871221  | -1.2272775 | -0.3853646 |
| H | -2.7016983 | 0.1976280  | -1.8851298 |
| H | -0.4033480 | -0.6739114 | -1.4735101 |
| H | -0.6506974 | 0.5364773  | 1.4929743  |
| H | 1.4035800  | 1.2811639  | -1.6430907 |
| H | 3.7227783  | 0.5641921  | -1.9420175 |
| H | 3.6310919  | -1.4147327 | 1.8848924  |
| H | 1.3006621  | -0.6814264 | 2.2085379  |
| H | -0.7512740 | -1.7358347 | 1.1962351  |
| H | -0.1941577 | -2.6929537 | -0.1732939 |
| H | -2.2699746 | -3.6133821 | 1.0129310  |
| H | -2.4729575 | -3.3578222 | -0.7368182 |
| H | -2.8527644 | 3.2760650  | 0.2258490  |
| H | -3.0885675 | 1.5032153  | 0.2536878  |
| H | -2.2727205 | 2.3219538  | 1.6364732  |
| H | -0.3895297 | 4.4290331  | 0.1099452  |
| H | 1.0948568  | 3.4326294  | 0.1409610  |
| H | -0.0084277 | 3.4280582  | 1.5609793  |

5a\_sy\_c\_7.log

E = -1184.832311

H = -1184.520081

G = -1184.587041

NImag=0

|   |            |           |            |
|---|------------|-----------|------------|
| C | -1.4480642 | 2.4867197 | -2.9776071 |
| C | -1.2224155 | 3.4648097 | -1.8574833 |
| C | -0.6730556 | 1.3585957 | -3.2277874 |
| O | -0.7488437 | 0.5863091 | -4.2132757 |
| C | -2.2890549 | 3.4186142 | -0.7233624 |
| C | -2.0439390 | 4.3699763 | 0.4277491  |
| C | -2.0369089 | 3.8719486 | 1.7350998  |
| C | -1.7894904 | 4.7125507 | 2.8137396  |
| C | -1.5502107 | 6.0712542 | 2.5783495  |
| C | -1.5544571 | 6.5849279 | 1.2760323  |
| C | -1.7987103 | 5.7314733 | 0.2069905  |
| O | 0.3291593  | 1.0052167 | -2.3173861 |
| C | 0.1537396  | 3.1780788 | -1.2361680 |
| C | 0.3358721  | 1.6802253 | -1.0680923 |
| S | -4.0355014 | 3.7446083 | -1.2697626 |
| C | -3.9346264 | 4.8499017 | -2.6905071 |
| C | -4.6242095 | 2.2086073 | -2.0109677 |
| C | -1.2933096 | 6.9511257 | 3.6874703  |
| N | -1.0869375 | 7.6589363 | 4.5805630  |
| H | -2.1740907 | 2.7141126 | -3.7509784 |
| H | -1.2160425 | 4.4981032 | -2.2325878 |
| H | -2.3753083 | 2.3967610 | -0.3364706 |

|   |            |           |            |
|---|------------|-----------|------------|
| H | -2.2208718 | 2.8153404 | 1.9083989  |
| H | -1.7804544 | 4.3252125 | 3.8271674  |
| H | -1.3642807 | 7.6397290 | 1.1076907  |
| H | -1.7846406 | 6.1366026 | -0.8006242 |
| H | 0.2920331  | 3.6767564 | -0.2716501 |
| H | 0.9262682  | 3.5522637 | -1.9175302 |
| H | -0.4527536 | 1.2636169 | -0.4226002 |
| H | 1.2999255  | 1.4525340 | -0.6050219 |
| H | -4.9613740 | 4.9805691 | -3.0394189 |
| H | -3.5444322 | 5.8085324 | -2.3456293 |
| H | -3.3110062 | 4.4230289 | -3.4751839 |
| H | -5.6719497 | 2.3803075 | -2.2677962 |
| H | -4.5531827 | 1.4343756 | -1.2445178 |
| H | -4.0298758 | 1.9513748 | -2.8850418 |

5a\_sy\_c\_7\_ts1.log

E = -1184.804524

H = -1184.495111

G = -1184.562002

NImag=1

|   |            |            |            |
|---|------------|------------|------------|
| C | -2.8084349 | -0.3713802 | -0.7374389 |
| C | -1.4490650 | -0.4204367 | -1.0250359 |
| C | -3.5143925 | -1.4689042 | -0.1341336 |
| O | -4.7326932 | -1.5142751 | 0.0285287  |
| C | -0.2908604 | 0.6935367  | 0.4770335  |
| C | 1.1184182  | 0.4000589  | 0.3602969  |
| C | 1.6868636  | -0.6442673 | 1.1323937  |
| C | 3.0072459  | -1.0198708 | 0.9755064  |
| C | 3.8188142  | -0.3574639 | 0.0359365  |
| C | 3.2791798  | 0.6785119  | -0.7423768 |
| C | 1.9517383  | 1.0427887  | -0.5866539 |
| O | -2.8116162 | -2.5814095 | 0.2390842  |
| C | -0.8013883 | -1.7730072 | -0.8891676 |
| C | -1.3816051 | -2.4852742 | 0.3143904  |
| S | -0.6789962 | 2.4208047  | 0.3582137  |
| C | -1.4400609 | 2.7842730  | -1.2491336 |
| C | -2.1291460 | 2.5492037  | 1.4216091  |
| C | 5.1877235  | -0.7403997 | -0.1273303 |
| N | 6.2981878  | -1.0516258 | -0.2589720 |
| H | -3.4255159 | 0.4839229  | -0.9879184 |
| H | -1.0442684 | 0.2318860  | -1.7952508 |
| H | -0.7979875 | 0.2858734  | 1.3479955  |
| H | 1.0679029  | -1.1535184 | 1.8662827  |
| H | 3.4255036  | -1.8180000 | 1.5811890  |
| H | 3.9027063  | 1.1856180  | -1.4723599 |
| H | 1.5526609  | 1.8311380  | -1.2211429 |
| H | 0.2850640  | -1.7122501 | -0.7961524 |
| H | -1.0161090 | -2.3474262 | -1.8006894 |
| H | -1.1167897 | -1.9583457 | 1.2397235  |
| H | -1.0228107 | -3.5135223 | 0.3880862  |
| H | -1.6515169 | 3.8559408  | -1.2383679 |
| H | -0.7064839 | 2.5663307  | -2.0269082 |
| H | -2.3568076 | 2.2149417  | -1.3956880 |
| H | -2.5440917 | 3.5508137  | 1.2955727  |
| H | -1.7960806 | 2.4047195  | 2.4501335  |
| H | -2.8513157 | 1.7840147  | 1.1311192  |

5a\_sy\_c\_9.log

E = -1184.837640

H = -1184.525591

G = -1184.592128  
 NImag=0

|   |            |           |            |
|---|------------|-----------|------------|
| C | -1.5735531 | 2.0938869 | -2.8071059 |
| C | -1.2700638 | 3.1160834 | -1.7426386 |
| C | -0.6889057 | 1.1192395 | -3.2573194 |
| O | -0.9082295 | 0.2097370 | -4.0909444 |
| C | -2.3668507 | 3.2092929 | -0.6579763 |
| C | -2.1361903 | 4.2289299 | 0.4266890  |
| C | -1.6589232 | 5.5166506 | 0.1452451  |
| C | -1.4466984 | 6.4295821 | 1.1714217  |
| C | -1.7113837 | 6.0529853 | 2.4932773  |
| C | -2.1805016 | 4.7688771 | 2.7921734  |
| C | -2.3890778 | 3.8672782 | 1.7558417  |
| O | 0.6127428  | 1.1066973 | -2.7373463 |
| C | 0.0434932  | 2.7492422 | -1.0420282 |
| C | 1.0408302  | 2.2957501 | -2.0904605 |
| S | -4.0180264 | 3.4406553 | -1.4876482 |
| C | -5.1173599 | 3.8974939 | -0.1363527 |
| C | -3.8870467 | 5.0043983 | -2.3703940 |
| C | -1.4912170 | 6.9958159 | 3.5578665  |
| N | -1.3144033 | 7.7544672 | 4.4147267  |
| H | -2.5365937 | 2.1073001 | -3.3097147 |
| H | -1.1500891 | 4.1292321 | -2.1607735 |
| H | -2.5007092 | 2.2168158 | -0.2103003 |
| H | -1.4333444 | 5.8136035 | -0.8741864 |
| H | -1.0748650 | 7.4253690 | 0.9543228  |
| H | -2.3763707 | 4.4851505 | 3.8207544  |
| H | -2.7511408 | 2.8677608 | 1.9802079  |
| H | -0.1255587 | 1.9259175 | -0.3349538 |
| H | 0.4490692  | 3.5989329 | -0.4833224 |
| H | 2.0104909  | 2.0664596 | -1.6404910 |
| H | 1.1867658  | 3.0901927 | -2.8384528 |
| H | -6.1072050 | 4.0377129 | -0.5755156 |
| H | -5.1412523 | 3.0647781 | 0.5695046  |
| H | -4.7713611 | 4.8153525 | 0.3418616  |
| H | -4.8711264 | 5.1903671 | -2.8061870 |
| H | -3.1495622 | 4.8844102 | -3.1658869 |
| H | -3.6151820 | 5.8090817 | -1.6854938 |

5a\_sy\_c\_9\_ts1.log  
 E = -1184.803155  
 H = -1184.493226  
 G = -1184.560819  
 NImag=1

|   |            |            |            |
|---|------------|------------|------------|
| C | 2.8316151  | -0.1894853 | 0.8281726  |
| C | 1.4956653  | -0.5831360 | 0.8222217  |
| C | 3.8129447  | -0.8418838 | 0.0056767  |
| O | 4.9137698  | -0.3902635 | -0.2999508 |
| C | 0.3100761  | 0.5754436  | -0.5748240 |
| C | -1.0815400 | 0.2348901  | -0.3790274 |
| C | -1.8498162 | 0.6883689  | 0.7194213  |
| C | -3.1502674 | 0.2522142  | 0.9177966  |
| C | -3.7258302 | -0.6699649 | 0.0310031  |
| C | -2.9786129 | -1.1489582 | -1.0591078 |
| C | -1.6860639 | -0.6993483 | -1.2568281 |
| O | 3.4975232  | -2.0853612 | -0.4768230 |
| C | 1.1858869  | -1.9663616 | 0.2713995  |
| C | 2.4613048  | -2.7849317 | 0.2267966  |
| S | 0.9178489  | 2.2090040  | -0.3944328 |
| C | -0.3151566 | 3.3498709  | -1.0665307 |
| C | 0.8703515  | 2.7250319  | 1.3441674  |

|   |            |            |            |
|---|------------|------------|------------|
| C | -5.0683973 | -1.1226382 | 0.2375209  |
| N | -6.1564006 | -1.4899601 | 0.4044829  |
| H | 3.1556818  | 0.7283257  | 1.3087269  |
| H | 0.8408429  | -0.2196532 | 1.6117071  |
| H | 0.7609252  | 0.1940636  | -1.4893158 |
| H | -1.4236729 | 1.3773593  | 1.4401839  |
| H | -3.7229282 | 0.6148982  | 1.7658344  |
| H | -3.4233577 | -1.8604360 | -1.7480609 |
| H | -1.1203773 | -1.0603738 | -2.1113354 |
| H | 0.7658187  | -1.9127609 | -0.7375011 |
| H | 0.4477632  | -2.4733444 | 0.9009712  |
| H | 2.3174744  | -3.7228165 | -0.3126069 |
| H | 2.8175806  | -3.0097744 | 1.2396316  |
| H | 0.0338856  | 4.3662312  | -0.8697594 |
| H | -0.3722636 | 3.1711973  | -2.1412134 |
| H | -1.2815527 | 3.1738204  | -0.5898472 |
| H | 1.5234376  | 3.5973725  | 1.4137001  |
| H | 1.2631973  | 1.9245058  | 1.9700061  |
| H | -0.1433872 | 2.9950266  | 1.6385653  |

5a\_sy\_c\_prod\_1.log

E = -706.946613  
H = -706.717994  
G = -706.772324

NImag=0

|   |            |            |            |
|---|------------|------------|------------|
| C | 0.7643039  | 0.1780998  | 3.1539701  |
| C | -0.6781289 | 0.6201365  | 3.2500193  |
| C | 0.2092174  | 1.2132561  | 2.1916424  |
| C | 0.0090233  | 0.9632760  | 0.7299627  |
| C | 1.0055971  | 0.3714197  | -0.0535013 |
| C | 0.8246837  | 0.1979938  | -1.4221788 |
| C | -0.3671665 | 0.6273604  | -2.0154717 |
| C | -1.3717849 | 1.2317663  | -1.2477845 |
| C | -1.1757571 | 1.3943666  | 0.1169276  |
| H | 0.5622306  | 2.2192182  | 2.4072366  |
| H | 1.4895975  | 0.5391738  | 3.8741053  |
| H | -0.9171862 | 1.2681149  | 4.0862622  |
| C | -1.7148273 | -0.4354122 | 2.8950123  |
| C | -1.1745205 | -1.8123302 | 3.2153788  |
| O | 0.0658204  | -2.0665459 | 2.5117297  |
| C | 1.0778807  | -1.1973380 | 2.6623513  |
| O | 2.2037915  | -1.5515834 | 2.3825973  |
| C | -0.5631132 | 0.4500911  | -3.4294097 |
| N | -0.7213723 | 0.3078163  | -4.5680948 |
| H | 1.9345391  | 0.0488059  | 0.4062748  |
| H | 1.5986555  | -0.2618076 | -2.0279867 |
| H | -2.2905699 | 1.5643407  | -1.7196784 |
| H | -1.9510675 | 1.8600911  | 0.7192736  |
| H | -2.6256711 | -0.2727931 | 3.4771748  |
| H | -1.9923867 | -0.3956190 | 1.8369772  |
| H | -0.9842887 | -1.9247507 | 4.2880565  |
| H | -1.8461998 | -2.6064471 | 2.8883533  |

5a\_sy\_c\_prod\_2.log

E = -706.949332  
H = -706.720584  
G = -706.774549

NImag=0

|   |            |           |           |
|---|------------|-----------|-----------|
| C | 0.8317803  | 0.1980925 | 3.1706113 |
| C | -0.6187913 | 0.6065502 | 3.3108037 |

|   |            |            |            |
|---|------------|------------|------------|
| C | 0.2138028  | 1.2138921  | 2.2247404  |
| C | 0.0033266  | 0.9818202  | 0.7632509  |
| C | 0.9656235  | 0.3358921  | -0.0196761 |
| C | 0.7565818  | 0.1390474  | -1.3803191 |
| C | -0.4265286 | 0.6043900  | -1.9653353 |
| C | -1.3917593 | 1.2712871  | -1.1982538 |
| C | -1.1688463 | 1.4566180  | 0.1594473  |
| H | 0.5483998  | 2.2255907  | 2.4446369  |
| H | 1.5667958  | 0.5822487  | 3.8674125  |
| H | -0.8437834 | 1.2542421  | 4.1519743  |
| C | -1.6378673 | -0.4785058 | 3.0502766  |
| C | -1.1689134 | -1.5253107 | 2.0522159  |
| O | 0.1748672  | -1.9949729 | 2.2932354  |
| C | 1.1464778  | -1.1976931 | 2.7603111  |
| O | 2.2602928  | -1.6660122 | 2.8905299  |
| C | -0.6514610 | 0.4019591  | -3.3714431 |
| N | -0.8331747 | 0.2394243  | -4.5039000 |
| H | 1.8865749  | -0.0190567 | 0.4346192  |
| H | 1.4999057  | -0.3681713 | -1.9865182 |
| H | -2.3023027 | 1.6318451  | -1.6654749 |
| H | -1.9150943 | 1.9640843  | 0.7643894  |
| H | -1.8643234 | -0.9654339 | 4.0047917  |
| H | -2.5732208 | -0.0548471 | 2.6678810  |
| H | -1.7886080 | -2.4202191 | 2.1230673  |
| H | -1.2144545 | -1.1637610 | 1.0234259  |

5a\_sy\_tr\_1.log

E = -1184.835642

H = -1184.523458

G = -1184.590991

NImag=0

|   |            |            |            |
|---|------------|------------|------------|
| C | -2.5343048 | 1.1056670  | -2.3585337 |
| C | -1.0882561 | 1.4685243  | -2.1698201 |
| C | -3.4771947 | 1.8914782  | -3.0068535 |
| O | -4.6170596 | 1.5535922  | -3.4060576 |
| C | -0.1861546 | 0.3528466  | -2.7566367 |
| C | 1.2968299  | 0.5754026  | -2.5800890 |
| C | 2.0170845  | 1.5179371  | -3.3264609 |
| C | 3.3690321  | 1.7247842  | -3.0863267 |
| C | 4.0085314  | 0.9893445  | -2.0805370 |
| C | 3.3039094  | 0.0459342  | -1.3260446 |
| C | 1.9535603  | -0.1582008 | -1.5865025 |
| O | -3.1537982 | 3.2315148  | -3.2565539 |
| C | -0.8123875 | 2.8563108  | -2.7609847 |
| C | -2.0327053 | 3.7327151  | -2.5413417 |
| S | -0.6227035 | 0.1130243  | -4.5539614 |
| C | 0.6978081  | -0.9947849 | -5.1036545 |
| C | -1.9892513 | -1.0738420 | -4.5575429 |
| C | 5.4085747  | 1.2019805  | -1.8251441 |
| N | 6.5353805  | 1.3728187  | -1.6196180 |
| H | -2.8339535 | 0.0858342  | -2.1337049 |
| H | -0.7901474 | 1.4827317  | -1.1070221 |
| H | -0.4628671 | -0.6015772 | -2.2951500 |
| H | 1.5342292  | 2.0932908  | -4.1116338 |
| H | 3.9273727  | 2.4497535  | -3.6690067 |
| H | 3.8100918  | -0.5220969 | -0.5526756 |
| H | 1.4021778  | -0.8950167 | -1.0097303 |
| H | -0.6442334 | 2.7995879  | -3.8441420 |
| H | 0.0717634  | 3.3180191  | -2.3105834 |
| H | -1.8623309 | 4.7466751  | -2.9125943 |
| H | -2.2740485 | 3.7900666  | -1.4692967 |



|   |            |            |            |
|---|------------|------------|------------|
| H | 0.4069303  | -1.3565036 | -6.0917293 |
| H | 1.6256365  | -0.4286286 | -5.1793121 |
| H | 0.7984307  | -1.8254303 | -4.4016092 |
| H | -1.9754130 | -1.5485340 | -5.5414836 |
| H | -2.9131143 | -0.5185719 | -4.4044554 |
| H | -1.8297196 | -1.8123470 | -3.7695071 |

5a\_sy\_tr\_10.log

E = -1184.829851  
H = -1184.517733  
G = -1184.584542

NImag=0

|   |            |            |            |
|---|------------|------------|------------|
| C | -1.7822370 | 1.6085002  | -3.5893247 |
| C | -1.5739363 | 0.6298884  | -2.4657057 |
| C | -2.0357452 | 2.9649599  | -3.4288207 |
| O | -2.1109449 | 3.8437648  | -4.3207665 |
| C | -0.3399791 | -0.3054218 | -2.5375705 |
| C | 1.0412329  | 0.3053904  | -2.4682238 |
| C | 1.4118953  | 1.4159634  | -3.2400930 |
| C | 2.6864300  | 1.9577563  | -3.1236581 |
| C | 3.6032826  | 1.3828715  | -2.2356891 |
| C | 3.2504964  | 0.2715450  | -1.4626815 |
| C | 1.9711445  | -0.2571408 | -1.5849149 |
| O | -2.2386922 | 3.4585796  | -2.1314842 |
| C | -1.4828797 | 1.3863795  | -1.1329782 |
| C | -2.5248882 | 2.4885649  | -1.1346040 |
| S | -0.3404891 | -1.5140262 | -3.9604948 |
| C | -2.0784654 | -1.7452884 | -4.3819679 |
| C | 0.2964587  | -0.6607356 | -5.4159134 |
| C | 4.9240918  | 1.9419137  | -2.1166041 |
| N | 5.9868933  | 2.3917984  | -2.0206989 |
| H | -1.7131944 | 1.2779571  | -4.6198995 |
| H | -2.4222829 | -0.0678959 | -2.3666222 |
| H | -0.4308375 | -1.0137220 | -1.7051983 |
| H | 0.6976303  | 1.8608665  | -3.9236721 |
| H | 2.9731706  | 2.8197286  | -3.7170114 |
| H | 3.9676874  | -0.1664409 | -0.7766430 |
| H | 1.6882931  | -1.1157449 | -0.9820043 |
| H | -0.4968396 | 1.8530120  | -1.0188918 |
| H | -1.6396835 | 0.7089327  | -0.2864911 |
| H | -2.5368006 | 3.0238694  | -0.1813218 |
| H | -3.5263764 | 2.0655656  | -1.3070257 |
| H | -2.0952858 | -2.4420919 | -5.2224901 |
| H | -2.5696311 | -2.1993838 | -3.5197858 |
| H | -2.5414415 | -0.7954701 | -4.6515443 |
| H | 0.1071155  | -1.3349178 | -6.2545731 |
| H | 1.3719503  | -0.5390632 | -5.2838179 |
| H | -0.1988422 | 0.2965357  | -5.5681134 |

5a\_sy\_tr\_10\_ts1.log

E = -1184.806991  
H = -1184.496897  
G = -1184.562699

NImag=1

|   |            |            |            |
|---|------------|------------|------------|
| C | -1.0397861 | -1.7672486 | 0.9050079  |
| C | -1.5897365 | -1.5464381 | -0.3619011 |
| C | 0.3028664  | -2.2360875 | 1.0892658  |
| O | 0.9323333  | -2.2448849 | 2.1460955  |
| C | -1.4342927 | 0.4888353  | -0.9507154 |
| C | -0.0665998 | 0.8388406  | -0.6293417 |

|   |            |            |            |
|---|------------|------------|------------|
| C | 0.3903864  | 0.9885268  | 0.6976863  |
| C | 1.7362451  | 1.1834683  | 0.9751320  |
| C | 2.6676928  | 1.2123590  | -0.0700209 |
| C | 2.2399500  | 1.0572703  | -1.4001835 |
| C | 0.8943238  | 0.8765728  | -1.6665453 |
| O | 0.9365158  | -2.7706741 | -0.0082342 |
| C | -0.8530162 | -2.1645020 | -1.5409116 |
| C | 0.0751060  | -3.2562738 | -1.0455615 |
| S | -2.7894944 | 1.3666099  | -0.2481322 |
| C | -3.1732865 | 0.7609917  | 1.4154644  |
| C | -2.2427301 | 3.0425858  | 0.1607122  |
| C | 4.0587772  | 1.4081862  | 0.2175553  |
| N | 5.1842907  | 1.5671724  | 0.4483971  |
| H | -1.5656415 | -1.4878298 | 1.8108475  |
| H | -2.6729726 | -1.5089807 | -0.4459835 |
| H | -1.6543118 | 0.4284229  | -2.0156772 |
| H | -0.3057935 | 0.9501252  | 1.5273476  |
| H | 2.0717577  | 1.2972763  | 2.0011395  |
| H | 2.9629306  | 1.0881017  | -2.2092583 |
| H | 0.5635552  | 0.7687329  | -2.6960362 |
| H | -0.2497565 | -1.4206095 | -2.0709856 |
| H | -1.5629570 | -2.5812975 | -2.2623214 |
| H | 0.7356757  | -3.6097412 | -1.8399599 |
| H | -0.4954941 | -4.1089248 | -0.6557918 |
| H | -3.9867291 | 1.3976518  | 1.7710284  |
| H | -3.5296128 | -0.2658386 | 1.3346739  |
| H | -2.3165761 | 0.8357119  | 2.0838267  |
| H | -3.1041461 | 3.5713043  | 0.5738774  |
| H | -1.9224683 | 3.5138843  | -0.7695483 |
| H | -1.4262211 | 3.0129654  | 0.8832741  |

5a\_sy\_tr\_1\_r.log

E = -1184.835938

H = -1184.523828

G = -1184.590648

NImag=0

|   |            |            |            |
|---|------------|------------|------------|
| C | 1.1643629  | -1.6120888 | -0.5364948 |
| C | 1.1837921  | -0.8191296 | 0.7472431  |
| C | 1.0353651  | -2.9946032 | -0.6211840 |
| O | 0.9248181  | -3.6944028 | -1.6545167 |
| C | 0.2258063  | 0.3772034  | 0.5889255  |
| C | 0.6001244  | 1.3099545  | -0.5383252 |
| C | 1.9017592  | 1.8136766  | -0.6559241 |
| C | 2.2286999  | 2.6807577  | -1.6905042 |
| C | 1.2455359  | 3.0414281  | -2.6202807 |
| C | -0.0570499 | 2.5415693  | -2.5176746 |
| C | -0.3716794 | 1.6809485  | -1.4719210 |
| O | 1.0201948  | -3.7377322 | 0.5677043  |
| C | 0.7894801  | -1.7297944 | 1.9109762  |
| C | 1.4819275  | -3.0683897 | 1.7304254  |
| S | 0.2040608  | 1.4009657  | 2.1664828  |
| C | -0.6077018 | 2.9326582  | 1.6591633  |
| C | -1.1487947 | 0.6746709  | 3.1210863  |
| C | 1.5809563  | 3.9364341  | -3.6961333 |
| N | 1.8506967  | 4.6577767  | -4.5609473 |
| H | 1.2458477  | -1.0842017 | -1.4812903 |
| H | 2.1801171  | -0.4024170 | 0.9743671  |
| H | -0.8074265 | 0.0316588  | 0.4698611  |
| H | 2.6705730  | 1.5348897  | 0.0592551  |
| H | 3.2352466  | 3.0748450  | -1.7835168 |
| H | -0.8089651 | 2.8253190  | -3.2464093 |

|   |            |            |            |
|---|------------|------------|------------|
| H | -1.3807393 | 1.2891115  | -1.3817443 |
| H | -0.2963713 | -1.8949997 | 1.9158812  |
| H | 1.0821384  | -1.3060752 | 2.8794597  |
| H | 1.2759368  | -3.7367443 | 2.5705168  |
| H | 2.5707376  | -2.9205343 | 1.6647378  |
| H | -0.8225960 | 3.4839212  | 2.5769359  |
| H | 0.0834730  | 3.5025415  | 1.0378771  |
| H | -1.5287507 | 2.6992140  | 1.1209440  |
| H | -1.3898300 | 1.3928894  | 3.9075057  |
| H | -0.8071641 | -0.2575565 | 3.5665289  |
| H | -2.0076583 | 0.5128619  | 2.4671724  |

5a\_sy\_tr\_1\_ts1.log

E = -1184.806162  
H = -1184.496800  
G = -1184.564227

NImag=1

|   |            |            |            |
|---|------------|------------|------------|
| C | 2.5092560  | -0.9922806 | 1.1776231  |
| C | 1.1443464  | -1.0646083 | 0.9074194  |
| C | 3.4926151  | -1.1810589 | 0.1506415  |
| O | 4.6644716  | -0.8078054 | 0.1989403  |
| C | 0.2142665  | 0.8780978  | 0.7159928  |
| C | -1.1619423 | 0.5560122  | 0.4340058  |
| C | -1.7280367 | 0.5164354  | -0.8649167 |
| C | -3.0229280 | 0.0733246  | -1.0715085 |
| C | -3.8071409 | -0.3464068 | 0.0150868  |
| C | -3.2717793 | -0.3080002 | 1.3145978  |
| C | -1.9789588 | 0.1374683  | 1.5158538  |
| O | 3.0975410  | -1.8294949 | -0.9896744 |
| C | 0.7429817  | -1.7269936 | -0.3999965 |
| C | 1.8860763  | -2.5923165 | -0.8922106 |
| S | 1.0898873  | 1.7678978  | -0.5242446 |
| C | 0.3251228  | 3.4115239  | -0.6109107 |
| C | 2.6268846  | 2.2090524  | 0.3107479  |
| C | -5.1466817 | -0.8013407 | -0.1980444 |
| N | -6.2330604 | -1.1719520 | -0.3706351 |
| H | 2.8747978  | -0.6008173 | 2.1211842  |
| H | 0.4602882  | -1.1706496 | 1.7465269  |
| H | 0.4309868  | 1.2696088  | 1.7090434  |
| H | -1.1520965 | 0.8336817  | -1.7307953 |
| H | -3.4364309 | 0.0522000  | -2.0750963 |
| H | -3.8782384 | -0.6245808 | 2.1577092  |
| H | -1.5761060 | 0.1721969  | 2.5244288  |
| H | 0.5133115  | -0.9848951 | -1.1734122 |
| H | -0.1557402 | -2.3375763 | -0.2693899 |
| H | 1.6968662  | -2.9759207 | -1.8962966 |
| H | 2.0576256  | -3.4377466 | -0.2145921 |
| H | 0.9093270  | 4.0171087  | -1.3074893 |
| H | -0.6911367 | 3.2838193  | -0.9877163 |
| H | 0.3180941  | 3.8504094  | 0.3885850  |
| H | 3.0969485  | 2.9840165  | -0.2978219 |
| H | 3.2709528  | 1.3317434  | 0.3592509  |
| H | 2.3946739  | 2.5864191  | 1.3086389  |

5a\_sy\_tr\_1\_ts2.log

E = -1184.824604  
H = -1184.514229  
G = -1184.581885

NImag=1

|   |           |            |            |
|---|-----------|------------|------------|
| C | 1.6141593 | -1.5376408 | -0.1735764 |
|---|-----------|------------|------------|

|   |            |            |            |
|---|------------|------------|------------|
| C | 1.6041834  | -0.1506202 | -0.7595291 |
| C | 2.7130879  | -2.0966677 | 0.5147489  |
| O | 2.7238844  | -3.1619037 | 1.1497317  |
| C | 0.5457524  | 0.3551267  | 0.1564381  |
| C | -0.8562819 | -0.1200486 | 0.0604032  |
| C | -1.4330922 | -0.4436721 | -1.1764393 |
| C | -2.7631791 | -0.8347914 | -1.2496954 |
| C | -3.5248094 | -0.9062178 | -0.0757186 |
| C | -2.9621906 | -0.5874258 | 1.1664823  |
| C | -1.6325927 | -0.1921915 | 1.2249111  |
| O | 3.9209969  | -1.4202796 | 0.4663355  |
| C | 2.9476638  | 0.5514758  | -0.5335629 |
| C | 4.0638401  | -0.4713031 | -0.5908070 |
| S | 0.2242791  | 2.5352781  | -0.4421343 |
| C | -1.3381841 | 2.9453262  | 0.3668085  |
| C | 1.3617013  | 3.3873523  | 0.6761098  |
| C | -4.9027543 | -1.3134923 | -0.1472429 |
| N | -6.0123163 | -1.6406272 | -0.2045830 |
| H | 0.7432562  | -2.1710851 | -0.2841097 |
| H | 1.3093938  | -0.1031318 | -1.8150488 |
| H | 0.8859855  | 0.5720886  | 1.1695425  |
| H | -0.8464710 | -0.3861040 | -2.0881832 |
| H | -3.2138139 | -1.0839847 | -2.2046626 |
| H | -3.5623760 | -0.6494343 | 2.0680302  |
| H | -1.1846851 | 0.0582623  | 2.1825195  |
| H | 2.9721296  | 1.0122090  | 0.4614548  |
| H | 3.1108459  | 1.3403851  | -1.2752474 |
| H | 5.0415376  | -0.0063452 | -0.4474344 |
| H | 4.0635674  | -0.9982041 | -1.5548667 |
| H | -1.4892704 | 4.0248377  | 0.2975421  |
| H | -2.1415386 | 2.4299927  | -0.1628900 |
| H | -1.3141176 | 2.6338784  | 1.4138768  |
| H | 1.0551878  | 4.4333902  | 0.7470528  |
| H | 2.3646109  | 3.3328978  | 0.2517989  |
| H | 1.3408006  | 2.9212140  | 1.6641140  |

5a\_sy\_tr\_2.log

E = -1184.831928

H = -1184.520147

G = -1184.587003

NImag=0

|   |            |            |            |
|---|------------|------------|------------|
| C | -2.4748059 | 1.0126693  | -2.0092629 |
| C | -1.0352686 | 1.4305626  | -2.0606187 |
| C | -3.5575746 | 1.7761475  | -2.4165345 |
| O | -4.7776560 | 1.4999979  | -2.3137211 |
| C | -0.1340682 | 0.4110825  | -2.8317653 |
| C | 1.3459015  | 0.6295609  | -2.6077602 |
| C | 2.1069196  | 1.5517727  | -3.3369601 |
| C | 3.4493522  | 1.7537905  | -3.0389952 |
| C | 4.0372803  | 1.0318291  | -1.9945328 |
| C | 3.2908675  | 0.1059661  | -1.2569835 |
| C | 1.9528327  | -0.0921340 | -1.5730982 |
| O | -3.3102791 | 3.0245274  | -3.0124756 |
| C | -0.9272796 | 2.8888819  | -2.5212365 |
| C | -2.0089367 | 3.2204819  | -3.5376543 |
| S | -0.4598066 | 0.3501817  | -4.6531102 |
| C | 0.6679648  | -0.9683517 | -5.1572011 |
| C | -2.0263762 | -0.5371825 | -4.8148066 |
| C | 5.4257900  | 1.2389508  | -1.6798350 |
| N | 6.5434206  | 1.4054508  | -1.4261392 |
| H | -2.7085282 | 0.0426381  | -1.5777282 |

|   |            |            |            |
|---|------------|------------|------------|
| H | -0.5775065 | 1.3701847  | -1.0594444 |
| H | -0.4033084 | -0.5937481 | -2.4860489 |
| H | 1.6676471  | 2.1195122  | -4.1531369 |
| H | 4.0378872  | 2.4648591  | -3.6089169 |
| H | 3.7571363  | -0.4534931 | -0.4528723 |
| H | 1.3699541  | -0.8148860 | -1.0091673 |
| H | 0.0569368  | 3.1292495  | -2.9362128 |
| H | -1.0725622 | 3.5378744  | -1.6505343 |
| H | -1.8939334 | 2.6201161  | -4.4532563 |
| H | -1.9507296 | 4.2723980  | -3.8314307 |
| H | 0.3848819  | -1.2506270 | -6.1730087 |
| H | 1.6854497  | -0.5777222 | -5.1519669 |
| H | 0.5638599  | -1.8143782 | -4.4742878 |
| H | -2.0715140 | -0.8731676 | -5.8535696 |
| H | -2.8385315 | 0.1525801  | -4.5944875 |
| H | -2.0337169 | -1.3846755 | -4.1268396 |

5a\_sy\_tr\_2\_r.log

E = -1184.835127

H = -1184.523168

G = -1184.590051

NImag=0

|   |            |            |            |
|---|------------|------------|------------|
| C | 1.6305501  | -1.5432799 | 1.7938299  |
| C | 1.0657801  | -1.1214724 | 0.4629129  |
| C | 2.9862911  | -1.7040609 | 2.0669256  |
| O | 3.5074279  | -2.1536286 | 3.1139111  |
| C | 0.4425178  | 0.2877805  | 0.6255290  |
| C | -0.7151999 | 0.3117447  | 1.5937969  |
| C | -1.7888233 | -0.5775380 | 1.4571219  |
| C | -2.8506610 | -0.5416751 | 2.3516741  |
| C | -2.8357658 | 0.3898694  | 3.3973484  |
| C | -1.7694876 | 1.2829242  | 3.5470208  |
| C | -0.7171632 | 1.2397684  | 2.6391796  |
| O | 3.9219959  | -1.3553430 | 1.0821878  |
| C | 2.1737691  | -1.1933374 | -0.5875562 |
| C | 3.4511536  | -0.5978672 | -0.0234343 |
| S | -0.1691459 | 0.9433058  | -1.0368890 |
| C | -1.3825989 | 2.2110500  | -0.6081013 |
| C | 1.1918877  | 2.0258969  | -1.5350169 |
| C | -3.9321144 | 0.4291280  | 4.3287638  |
| N | -4.8149048 | 0.4612633  | 5.0775584  |
| H | 0.9458029  | -1.8202312 | 2.5893057  |
| H | 0.2538559  | -1.7893183 | 0.1431313  |
| H | 1.1966376  | 1.0202299  | 0.9295344  |
| H | -1.8085565 | -1.3018907 | 0.6474713  |
| H | -3.6847419 | -1.2273258 | 2.2463724  |
| H | -1.7685357 | 1.9988239  | 4.3622188  |
| H | 0.1142217  | 1.9306252  | 2.7456409  |
| H | 1.9059357  | -0.7115890 | -1.5342829 |
| H | 2.3567033  | -2.2485150 | -0.8198417 |
| H | 3.2913539  | 0.4463256  | 0.2878553  |
| H | 4.2550840  | -0.6075196 | -0.7644645 |
| H | -1.5980539 | 2.7526607  | -1.5317076 |
| H | -2.2866603 | 1.7194449  | -0.2480919 |
| H | -0.9661806 | 2.8807668  | 0.1468670  |
| H | 0.8579981  | 2.5643129  | -2.4240543 |
| H | 2.0620260  | 1.4171788  | -1.7790502 |
| H | 1.4122060  | 2.7182494  | -0.7201988 |

5a\_sy\_tr\_2\_ts1.log

E = -1184.807952  
H = -1184.498735  
G = -1184.566051

NImag=1

|   |            |            |            |
|---|------------|------------|------------|
| C | 2.4804792  | -1.0822186 | 1.1709332  |
| C | 1.1581328  | -1.1382210 | 0.7336147  |
| C | 3.5951717  | -1.3610025 | 0.3187076  |
| O | 4.7705797  | -1.4187189 | 0.6809792  |
| C | 0.1871321  | 0.7682855  | 0.6443218  |
| C | -1.2053508 | 0.4428636  | 0.4000061  |
| C | -1.8289780 | 0.5004379  | -0.8697846 |
| C | -3.1299825 | 0.0641896  | -1.0528343 |
| C | -3.8567657 | -0.4570268 | 0.0296620  |
| C | -3.2594524 | -0.5295822 | 1.2979959  |
| C | -1.9607889 | -0.0845497 | 1.4753367  |
| O | 3.3603412  | -1.6481656 | -1.0035279 |
| C | 0.9385688  | -1.7348977 | -0.6318836 |
| C | 2.0743539  | -1.3349405 | -1.5509581 |
| S | 0.8871173  | 1.9270818  | -0.4807417 |
| C | 0.2825998  | 3.5537088  | 0.0467889  |
| C | 2.6018667  | 2.0671079  | 0.0569322  |
| C | -5.2017848 | -0.9099783 | -0.1588345 |
| N | -6.2913635 | -1.2786120 | -0.3118394 |
| H | 2.7245124  | -0.8420659 | 2.2001267  |
| H | 0.3878038  | -1.3482736 | 1.4743394  |
| H | 0.4268986  | 1.0529302  | 1.6694335  |
| H | -1.2915743 | 0.8891582  | -1.7306677 |
| H | -3.5899996 | 0.1216950  | -2.0343726 |
| H | -3.8206409 | -0.9281156 | 2.1376096  |
| H | -1.5114847 | -0.1302548 | 2.4637060  |
| H | -0.0129762 | -1.4247125 | -1.0741016 |
| H | 0.9085589  | -2.8279577 | -0.5302781 |
| H | 2.0366546  | -0.2585094 | -1.7678758 |
| H | 2.0241377  | -1.8641264 | -2.5043924 |
| H | 0.7723072  | 4.3138758  | -0.5664201 |
| H | -0.7950635 | 3.5696244  | -0.1255407 |
| H | 0.5113866  | 3.6906832  | 1.1056883  |
| H | 2.9905260  | 2.9839026  | -0.3901649 |
| H | 3.1631083  | 1.2108976  | -0.3136671 |
| H | 2.6402066  | 2.1177715  | 1.1468006  |

5a\_sy\_tr\_3.log

E = -1184.829438  
H = -1184.517166  
G = -1184.582809

NImag=0

|   |            |            |            |
|---|------------|------------|------------|
| C | -2.4412621 | 0.9181962  | -2.3090576 |
| C | -0.9901465 | 1.2665962  | -2.1376807 |
| C | -3.3594710 | 1.6841626  | -3.0063544 |
| O | -4.5094344 | 1.3677648  | -3.3952553 |
| C | -0.0518263 | 0.1629160  | -2.7077196 |
| C | 1.4162868  | 0.4706508  | -2.5200441 |
| C | 2.1624891  | 1.2165763  | -3.4395895 |
| C | 3.4926358  | 1.5270022  | -3.1846533 |
| C | 4.0811453  | 1.0967032  | -1.9899197 |
| C | 3.3466841  | 0.3552482  | -1.0575876 |
| C | 2.0208156  | 0.0438861  | -1.3321665 |
| O | -2.9758923 | 2.9934929  | -3.3502820 |
| C | -0.6690327 | 2.6715796  | -2.6747796 |
| C | -1.9123041 | 3.5372403  | -2.5780553 |
| S | -0.3338253 | -0.4067479 | -4.4555668 |

|   |            |            |            |
|---|------------|------------|------------|
| C | -1.7775882 | -1.4888855 | -4.3595924 |
| C | -1.0028223 | 0.9261506  | -5.4773201 |
| C | 5.4568232  | 1.4186757  | -1.7191609 |
| N | 6.5642788  | 1.6778736  | -1.5007696 |
| H | -2.7602188 | -0.0779896 | -2.0156077 |
| H | -0.7018832 | 1.2467927  | -1.0725140 |
| H | -0.2832010 | -0.7675077 | -2.1754655 |
| H | 1.7180612  | 1.5715296  | -4.3657109 |
| H | 4.0705689  | 2.1011534  | -3.9009807 |
| H | 3.8131242  | 0.0224125  | -0.1363311 |
| H | 1.4475727  | -0.5396942 | -0.6173475 |
| H | -0.3542349 | 2.6491086  | -3.7220432 |
| H | 0.1500544  | 3.1269944  | -2.1086704 |
| H | -1.7264709 | 4.5390019  | -2.9746606 |
| H | -2.2323143 | 3.6314247  | -1.5299847 |
| H | -1.8334897 | -2.0020169 | -5.3221096 |
| H | -1.5986435 | -2.2134424 | -3.5633583 |
| H | -2.6690229 | -0.8935426 | -4.1645210 |
| H | -1.3209891 | 0.4317049  | -6.3985310 |
| H | -0.2055658 | 1.6340325  | -5.7046085 |
| H | -1.8472006 | 1.4038563  | -4.9807003 |

5a\_sy\_tr\_3\_r.log

E = -1184.832276

H = -1184.520027

G = -1184.586730

NImag=0

|   |            |            |            |
|---|------------|------------|------------|
| C | -1.2508732 | -1.5248803 | 0.3096274  |
| C | -1.0349048 | -0.7479829 | -0.9716573 |
| C | -1.0595826 | -2.8939805 | 0.4640932  |
| O | -1.1137686 | -3.5624275 | 1.5228888  |
| C | -0.1183687 | 0.4439147  | -0.6389465 |
| C | -0.6301121 | 1.3508278  | 0.4626285  |
| C | -1.9736623 | 1.7405718  | 0.5119809  |
| C | -2.4235352 | 2.5884787  | 1.5171964  |
| C | -1.5203985 | 3.0476353  | 2.4828206  |
| C | -0.1746271 | 2.6644572  | 2.4464332  |
| C | 0.2612933  | 1.8200784  | 1.4327452  |
| O | -0.7758110 | -3.6590773 | -0.6748211 |
| C | -0.4206991 | -1.6734512 | -2.0255538 |
| C | -1.0663289 | -3.0425567 | -1.9183465 |
| S | 0.2753958  | 1.6382657  | -2.0357334 |
| C | 1.4523253  | 0.8044626  | -3.1212246 |
| C | -1.2064684 | 1.7158059  | -3.0594266 |
| C | -1.9825698 | 3.9223255  | 3.5277347  |
| N | -2.3543910 | 4.6274889  | 4.3677464  |
| H | -1.5384359 | -0.9870236 | 1.2065085  |
| H | -1.9770811 | -0.3432857 | -1.3757491 |
| H | 0.8817272  | 0.0785160  | -0.3767781 |
| H | -2.6813168 | 1.3758265  | -0.2268798 |
| H | -3.4648034 | 2.8901849  | 1.5593859  |
| H | 0.5147080  | 3.0229032  | 3.2035876  |
| H | 1.3037684  | 1.5157448  | 1.3972940  |
| H | 0.6595738  | -1.7800473 | -1.8578457 |
| H | -0.5743023 | -1.2964516 | -3.0414611 |
| H | -0.6879221 | -3.7169088 | -2.6910827 |
| H | -2.1567552 | -2.9536024 | -2.0409348 |
| H | 1.8214436  | 1.5698325  | -3.8070807 |
| H | 2.2727683  | 0.4424102  | -2.4988480 |
| H | 0.9799291  | -0.0078132 | -3.6698692 |
| H | -0.9740538 | 2.4027000  | -3.8762438 |

|   |            |           |            |
|---|------------|-----------|------------|
| H | -2.0121259 | 2.1302239 | -2.4510013 |
| H | -1.4649690 | 0.7298434 | -3.4460963 |

5a\_sy\_tr\_3\_ts1.log

E = -1184.802698  
H = -1184.493263  
G = -1184.560344

NImag=1

|   |            |            |            |
|---|------------|------------|------------|
| C | -2.4413998 | -0.8387593 | -1.2570439 |
| C | -1.0797471 | -0.9344211 | -0.9801684 |
| C | -3.4433401 | -1.1322085 | -0.2751906 |
| O | -4.6293830 | -0.8135653 | -0.3295879 |
| C | -0.1364346 | 0.9928467  | -0.7015663 |
| C | 1.2460731  | 0.6834556  | -0.4361296 |
| C | 1.8164202  | 0.6872485  | 0.8604423  |
| C | 3.1158190  | 0.2606026  | 1.0753122  |
| C | 3.8912282  | -0.2036813 | 0.0003958  |
| C | 3.3448973  | -0.2240656 | -1.2953015 |
| C | 2.0513210  | 0.2148843  | -1.5057968 |
| O | -3.0414844 | -1.8250317 | 0.8400556  |
| C | -0.6721179 | -1.7022797 | 0.2657799  |
| C | -1.8260093 | -2.5796309 | 0.7138984  |
| S | -0.9030528 | 2.1524373  | 0.4054455  |
| C | -2.3069963 | 2.6877274  | -0.5917696 |
| C | -1.7738454 | 1.2373856  | 1.7076065  |
| C | 5.2319706  | -0.6513675 | 0.2212109  |
| N | 6.3198331  | -1.0151548 | 0.3989906  |
| H | -2.7955071 | -0.4023426 | -2.1850271 |
| H | -0.3952661 | -0.9811195 | -1.8238601 |
| H | -0.3715264 | 1.3119590  | -1.7145676 |
| H | 1.2386581  | 1.0233731  | 1.7186906  |
| H | 3.5365746  | 0.2775782  | 2.0759563  |
| H | 3.9456191  | -0.5764107 | -2.1283484 |
| H | 1.6420761  | 0.2121090  | -2.5124631 |
| H | -0.3869084 | -1.0303149 | 1.0811348  |
| H | 0.1999085  | -2.3310740 | 0.0587600  |
| H | -1.6440902 | -3.0118935 | 1.6994617  |
| H | -1.9959660 | -3.3920413 | -0.0031688 |
| H | -2.9298771 | 3.3275190  | 0.0350096  |
| H | -1.9127555 | 3.2564975  | -1.4350919 |
| H | -2.8580510 | 1.8087289  | -0.9307858 |
| H | -2.3562449 | 1.9824267  | 2.2545487  |
| H | -1.0276396 | 0.8006359  | 2.3727140  |
| H | -2.4224351 | 0.4721588  | 1.2859520  |

5a\_sy\_tr\_3\_ts2.log

E = -1184.822244  
H = -1184.511826  
G = -1184.579416

NImag=1

|   |            |            |            |
|---|------------|------------|------------|
| C | -1.3637638 | -1.6247122 | 0.3908957  |
| C | -1.5115115 | -0.1499863 | 0.6713906  |
| C | -2.3603517 | -2.4114034 | -0.2234149 |
| O | -2.2337865 | -3.5680858 | -0.6541278 |
| C | -0.5176904 | 0.2627862  | -0.3638708 |
| C | 0.9302978  | -0.0510581 | -0.2108544 |
| C | 1.5181003  | -0.1999743 | 1.0529348  |
| C | 2.8785388  | -0.4556271 | 1.1701110  |
| C | 3.6607715  | -0.5603761 | 0.0137535  |
| C | 3.0885544  | -0.4065574 | -1.2559861 |



|   |            |            |            |
|---|------------|------------|------------|
| C | 1.7292043  | -0.1494312 | -1.3586603 |
| O | -3.6307669 | -1.8683864 | -0.3357062 |
| C | -2.9293999 | 0.3405403  | 0.3488262  |
| C | -3.9190055 | -0.7884031 | 0.5514082  |
| S | -0.2693204 | 2.5086570  | -0.4103006 |
| C | -1.7983938 | 3.2238033  | -1.0592452 |
| C | -0.4285420 | 2.9209272  | 1.3405679  |
| C | 5.0687881  | -0.8296423 | 0.1307220  |
| N | 6.2027178  | -1.0460801 | 0.2254429  |
| H | -0.4351607 | -2.1253624 | 0.6315439  |
| H | -1.2135640 | 0.1398719  | 1.6849205  |
| H | -0.8889015 | 0.1987842  | -1.3861823 |
| H | 0.9158002  | -0.1278914 | 1.9530774  |
| H | 3.3345774  | -0.5760445 | 2.1471198  |
| H | 3.7055735  | -0.4902299 | -2.1443572 |
| H | 1.2751193  | -0.0266595 | -2.3382713 |
| H | -2.9930528 | 0.6549334  | -0.6995542 |
| H | -3.2004815 | 1.1981877  | 0.9728346  |
| H | -4.9378701 | -0.4706750 | 0.3194540  |
| H | -3.8917858 | -1.1524455 | 1.5874872  |
| H | -1.6714172 | 4.3073477  | -1.1142426 |
| H | -1.9548626 | 2.8243724  | -2.0631993 |
| H | -2.6434598 | 2.9771329  | -0.4164159 |
| H | -0.3697714 | 4.0061748  | 1.4488416  |
| H | 0.4064246  | 2.4593915  | 1.8718177  |
| H | -1.3794413 | 2.5540407  | 1.7322928  |

5a\_sy\_tr\_4.log

E = -1184.837388

H = -1184.525564

G = -1184.593467

NImag=0

|   |            |            |            |
|---|------------|------------|------------|
| C | -1.9424081 | 1.6498870  | -3.4996462 |
| C | -1.6675642 | 0.4430872  | -2.6537257 |
| C | -2.0605849 | 2.9526397  | -3.0262604 |
| O | -2.4315863 | 3.9675014  | -3.6620845 |
| C | -0.3822541 | -0.3658877 | -3.0392707 |
| C | 0.9365795  | 0.3071747  | -2.7693614 |
| C | 1.3945401  | 1.3852478  | -3.5396694 |
| C | 2.5745628  | 2.0382260  | -3.2040651 |
| C | 3.3038292  | 1.6104592  | -2.0885310 |
| C | 2.8671626  | 0.5245921  | -1.3201720 |
| C | 1.6896428  | -0.1242769 | -1.6715798 |
| O | -1.7668148 | 3.2087899  | -1.6815501 |
| C | -1.6145001 | 0.8329043  | -1.1691747 |
| C | -1.0203332 | 2.2202013  | -0.9860195 |
| S | -0.4467326 | -0.7707772 | -4.8361408 |
| C | 0.7398437  | -2.1252969 | -4.9211967 |
| C | -2.0015483 | -1.6688851 | -4.9871752 |
| C | 4.5242306  | 2.2862979  | -1.7357322 |
| N | 5.5065119  | 2.8300791  | -1.4515430 |
| H | -2.2260109 | 1.5078118  | -4.5405025 |
| H | -2.4713479 | -0.3007994 | -2.7541587 |
| H | -0.4092326 | -1.3379604 | -2.5324179 |
| H | 0.8256349  | 1.7295937  | -4.3971675 |
| H | 2.9276330  | 2.8758226  | -3.7964147 |
| H | 3.4468323  | 0.1943640  | -0.4646389 |
| H | 1.3446997  | -0.9684791 | -1.0814516 |
| H | -1.0470430 | 0.1043714  | -0.5776697 |
| H | -2.6381529 | 0.8446467  | -0.7784962 |
| H | 0.0246963  | 2.2525951  | -1.3212044 |

|   |            |            |            |
|---|------------|------------|------------|
| H | -1.0443306 | 2.5098347  | 0.0685354  |
| H | 0.7093652  | -2.5195701 | -5.9383767 |
| H | 1.7284544  | -1.7112781 | -4.7146310 |
| H | 0.4731296  | -2.8936090 | -4.1929537 |
| H | -1.9763868 | -2.1729812 | -5.9552866 |
| H | -2.8166591 | -0.9443706 | -4.9700540 |
| H | -2.0906583 | -2.3922560 | -4.1741128 |

5a\_sy\_tr\_4\_ts1.log

E = -1184.811847  
H = -1184.502383  
G = -1184.569146

NImag=1

|   |            |            |            |
|---|------------|------------|------------|
| C | -1.5734151 | 1.8195500  | -0.3779902 |
| C | -1.5919012 | 1.1941249  | 0.8622312  |
| C | -0.5651239 | 2.7672401  | -0.7645088 |
| O | -0.5814191 | 3.4226213  | -1.8059233 |
| C | -1.1786842 | -0.9562096 | 0.6851123  |
| C | 0.2145247  | -1.0473755 | 0.3424407  |
| C | 0.7111170  | -0.7353868 | -0.9497095 |
| C | 2.0730649  | -0.6705736 | -1.1959649 |
| C | 2.9899959  | -0.9193601 | -0.1633215 |
| C | 2.5203704  | -1.2501391 | 1.1227040  |
| C | 1.1621939  | -1.3162852 | 1.3639965  |
| O | 0.4387394  | 3.0547241  | 0.1183534  |
| C | -0.5512575 | 1.6294472  | 1.8607783  |
| C | 0.7097870  | 2.1134148  | 1.1647654  |
| S | -2.2872486 | -1.4303965 | -0.5925837 |
| C | -2.4324431 | -3.2297167 | -0.4547631 |
| C | -3.9136468 | -0.9460529 | 0.0166287  |
| C | 4.3960356  | -0.8544748 | -0.4205174 |
| N | 5.5370402  | -0.8016697 | -0.6272830 |
| H | -2.3825674 | 1.6919706  | -1.0910574 |
| H | -2.5451923 | 0.8993035  | 1.2915108  |
| H | -1.4821552 | -1.3599877 | 1.6519202  |
| H | 0.0256350  | -0.5310617 | -1.7664267 |
| H | 2.4348460  | -0.4207681 | -2.1888106 |
| H | 3.2291059  | -1.4568702 | 1.9187634  |
| H | 0.8060179  | -1.5723141 | 2.3580280  |
| H | -0.2895357 | 0.8239354  | 2.5548542  |
| H | -0.9830594 | 2.4424568  | 2.4600270  |
| H | 1.2674427  | 1.2780303  | 0.7321904  |
| H | 1.3645515  | 2.6361604  | 1.8650787  |
| H | -3.1774219 | -3.5689931 | -1.1777964 |
| H | -1.4550191 | -3.6500296 | -0.6983695 |
| H | -2.7241955 | -3.4889926 | 0.5648223  |
| H | -4.6469865 | -1.5129740 | -0.5602215 |
| H | -4.0539452 | 0.1197008  | -0.1654148 |
| H | -3.9929270 | -1.1844965 | 1.0793189  |

5a\_sy\_tr\_5.log

E = -1184.836886  
H = -1184.525105  
G = -1184.592249

NImag=0

|   |            |            |            |
|---|------------|------------|------------|
| C | -1.7464629 | 1.7882924  | -3.5381086 |
| C | -1.5468922 | 0.6007643  | -2.6387351 |
| C | -2.0394334 | 3.0755451  | -3.1027881 |
| O | -2.1251100 | 4.1200893  | -3.7905495 |
| C | -0.3114120 | -0.2766022 | -2.9799273 |

|   |            |            |            |
|---|------------|------------|------------|
| C | 1.0407280  | 0.3433543  | -2.7364361 |
| C | 1.5049421  | 1.4367146  | -3.4799732 |
| C | 2.7389685  | 2.0089322  | -3.1909325 |
| C | 3.5157465  | 1.4827193  | -2.1527779 |
| C | 3.0690110  | 0.3841190  | -1.4088298 |
| C | 1.8355608  | -0.1799917 | -1.7101088 |
| O | -2.2742341 | 3.2799187  | -1.7349085 |
| C | -1.4417669 | 1.0694155  | -1.1849746 |
| C | -2.5149387 | 2.1179274  | -0.9535226 |
| S | -0.3838199 | -0.7755866 | -4.7576953 |
| C | 0.7637527  | -2.1649987 | -4.7711016 |
| C | -1.9661065 | -1.6310297 | -4.8575898 |
| C | 4.7929859  | 2.0730118  | -1.8513795 |
| N | 5.8211107  | 2.5472388  | -1.6078091 |
| H | -1.6241387 | 1.6796312  | -4.6131839 |
| H | -2.3929053 | -0.1063453 | -2.6770823 |
| H | -0.3827029 | -1.2223606 | -2.4296898 |
| H | 0.9057811  | 1.8472313  | -4.2858953 |
| H | 3.0996760  | 2.8565353  | -3.7640304 |
| H | 3.6826995  | -0.0201611 | -0.6106489 |
| H | 1.4805103  | -1.0321432 | -1.1373748 |
| H | -0.4663705 | 1.5335684  | -0.9959122 |
| H | -1.5643994 | 0.2322876  | -0.4887887 |
| H | -2.5281539 | 2.4493219  | 0.0881942  |
| H | -3.5064117 | 1.7073025  | -1.1983301 |
| H | 0.7044893  | -2.6233131 | -5.7600194 |
| H | 1.7667903  | -1.7673133 | -4.6070871 |
| H | 0.4878561  | -2.8761969 | -3.9901204 |
| H | -1.9674227 | -2.1782894 | -5.8023234 |
| H | -2.7555731 | -0.8783044 | -4.8652203 |
| H | -2.0704539 | -2.3135850 | -4.0117392 |

5a\_sy\_tr\_5\_ts1.log

E = -1184.809270

H = -1184.499904

G = -1184.567367

NImag=1

|   |            |            |            |
|---|------------|------------|------------|
| C | 1.0911601  | -1.9098311 | -0.7215559 |
| C | 1.4748160  | -1.4922164 | 0.5523002  |
| C | -0.2497405 | -2.3320583 | -1.0142122 |
| O | -0.7334804 | -2.4873113 | -2.1339248 |
| C | 1.3868303  | 0.6710167  | 0.6888558  |
| C | 0.0012694  | 0.9631606  | 0.4157176  |
| C | -0.5672059 | 0.8184072  | -0.8733514 |
| C | -1.9332832 | 0.9461328  | -1.0713403 |
| C | -2.7787306 | 1.2239039  | 0.0118441  |
| C | -2.2369703 | 1.3828877  | 1.3005595  |
| C | -0.8741830 | 1.2551572  | 1.4917400  |
| O | -1.0582209 | -2.6301214 | 0.0560898  |
| C | 0.5656603  | -1.8630549 | 1.7084084  |
| C | -0.3833790 | -2.9653865 | 1.2751336  |
| S | 2.4996317  | 1.1835407  | -0.5740447 |
| C | 2.8104797  | 2.9380250  | -0.2544857 |
| C | 4.0883386  | 0.4955940  | -0.0714491 |
| C | -4.1893453 | 1.3591675  | -0.1944733 |
| N | -5.3327777 | 1.4689892  | -0.3594430 |
| H | 1.7521707  | -1.7996832 | -1.5761608 |
| H | 2.5342796  | -1.4473737 | 0.7837388  |
| H | 1.7624316  | 0.9368077  | 1.6783776  |
| H | 0.0631442  | 0.5987858  | -1.7287611 |
| H | -2.3530261 | 0.8235938  | -2.0651159 |

|   |            |            |            |
|---|------------|------------|------------|
| H | -2.8897995 | 1.6103056  | 2.1375389  |
| H | -0.4597431 | 1.3834395  | 2.4881056  |
| H | -0.0228558 | -1.0065099 | 2.0508763  |
| H | 1.1588641  | -2.2093352 | 2.5608660  |
| H | -1.1700395 | -3.1295810 | 2.0142632  |
| H | 0.1601626  | -3.9068277 | 1.1241936  |
| H | 3.5499892  | 3.2907275  | -0.9767602 |
| H | 1.8644722  | 3.4627057  | -0.4000759 |
| H | 3.1687951  | 3.0582822  | 0.7697800  |
| H | 4.8593356  | 1.0692340  | -0.5891728 |
| H | 4.1348900  | -0.5453898 | -0.3904965 |
| H | 4.2007539  | 0.5877341  | 1.0109528  |

5a\_sy\_tr\_6.log

E = -1184.829806  
H = -1184.517629  
G = -1184.583446

NImag=0

|   |            |            |            |
|---|------------|------------|------------|
| C | -1.9247911 | 1.5323564  | -3.5293490 |
| C | -1.6800134 | 0.4662212  | -2.5062956 |
| C | -1.9640616 | 2.8980700  | -3.2748114 |
| O | -2.2683483 | 3.8141063  | -4.0767993 |
| C | -0.4035032 | -0.4188737 | -2.6719260 |
| C | 0.9395386  | 0.2577984  | -2.5573946 |
| C | 1.3277207  | 1.3098139  | -3.4014111 |
| C | 2.5421200  | 1.9565212  | -3.2073083 |
| C | 3.3781470  | 1.5545384  | -2.1590334 |
| C | 3.0075784  | 0.5060086  | -1.3099771 |
| C | 1.7928640  | -0.1361230 | -1.5191711 |
| O | -1.6639136 | 3.3610577  | -1.9879836 |
| C | -1.6664461 | 1.0865574  | -1.0981795 |
| C | -1.0185008 | 2.4614521  | -1.0974431 |
| S | -0.3929369 | -1.5109887 | -4.1785960 |
| C | -2.1297666 | -1.9056112 | -4.4610461 |
| C | -0.0143766 | -0.5199883 | -5.6378010 |
| C | 4.6336776  | 2.2271389  | -1.9534156 |
| N | 5.6439461  | 2.7684550  | -1.7875032 |
| H | -2.2221739 | 1.2443411  | -4.5332710 |
| H | -2.4967840 | -0.2686941 | -2.5065094 |
| H | -0.4527071 | -1.1981196 | -1.9012752 |
| H | 0.6684538  | 1.6473844  | -4.1915831 |
| H | 2.8394635  | 2.7734017  | -3.8564729 |
| H | 3.6623604  | 0.2017612  | -0.5003546 |
| H | 1.4971358  | -0.9471469 | -0.8597888 |
| H | -1.1518990 | 0.4414763  | -0.3755168 |
| H | -2.7041153 | 1.1938365  | -0.7625387 |
| H | 0.0464816  | 2.3972394  | -1.3537856 |
| H | -1.0949093 | 2.9146010  | -0.1045087 |
| H | -2.1500386 | -2.6008416 | -5.3025401 |
| H | -2.5102737 | -2.4012010 | -3.5661149 |
| H | -2.6969141 | -1.0026950 | -4.6905650 |
| H | -0.2338447 | -1.1706136 | -6.4879665 |
| H | 1.0514780  | -0.2920254 | -5.6235528 |
| H | -0.6245477 | 0.3814853  | -5.6683112 |

5a\_sy\_tr\_6\_ts1.log

E = -1184.807480  
H = -1184.497684  
G = -1184.564358

NImag=1

|   |            |            |            |
|---|------------|------------|------------|
| C | -1.4932734 | 1.9641568  | -0.0146113 |
| C | -1.7025253 | 1.2533344  | 1.1646581  |
| C | -0.4192076 | 2.8997758  | -0.1933890 |
| O | -0.2757763 | 3.6236053  | -1.1793700 |
| C | -1.2062486 | -0.8469514 | 0.9709141  |
| C | 0.0941236  | -0.9158598 | 0.3381748  |
| C | 0.3113966  | -0.4973150 | -0.9930514 |
| C | 1.5919060  | -0.4478936 | -1.5283214 |
| C | 2.6925026  | -0.8088957 | -0.7407494 |
| C | 2.5009819  | -1.2319586 | 0.5874680  |
| C | 1.2218248  | -1.2837704 | 1.1094250  |
| O | 0.4676430  | 3.0905371  | 0.8300620  |
| C | -0.8210352 | 1.6352453  | 2.3307379  |
| C | 0.5463492  | 2.0807109  | 1.8430238  |
| S | -2.6003276 | -1.6193310 | 0.2214092  |
| C | -3.3358392 | -0.5692381 | -1.0580310 |
| C | -2.0095273 | -2.9768983 | -0.8191855 |
| C | 4.0147108  | -0.7542576 | -1.2914910 |
| N | 5.0856525  | -0.7105701 | -1.7350940 |
| H | -2.1883156 | 1.9139692  | -0.8444775 |
| H | -2.7196883 | 0.9701200  | 1.4262589  |
| H | -1.2258649 | -1.1767655 | 2.0086884  |
| H | -0.5246385 | -0.1992549 | -1.6155222 |
| H | 1.7445116  | -0.1211337 | -2.5523058 |
| H | 3.3555543  | -1.5195143 | 1.1920140  |
| H | 1.0745502  | -1.6068061 | 2.1365827  |
| H | -0.6956878 | 0.8134641  | 3.0416907  |
| H | -1.3086731 | 2.4594361  | 2.8689717  |
| H | 1.1121832  | 1.2360463  | 1.4386474  |
| H | 1.1257348  | 2.5250516  | 2.6549634  |
| H | -4.1270030 | -1.1754154 | -1.5056360 |
| H | -3.7806791 | 0.3020391  | -0.5773611 |
| H | -2.6082135 | -0.2824191 | -1.8163771 |
| H | -2.8880211 | -3.4517510 | -1.2609526 |
| H | -1.4877465 | -3.6805724 | -0.1687961 |
| H | -1.3440703 | -2.5987462 | -1.5967199 |

5a\_sy\_tr\_7.log

E = -1184.833221

H = -1184.521161

G = -1184.587679

NImag=0

|   |            |            |            |
|---|------------|------------|------------|
| C | -2.1448090 | 1.5482310  | -3.3851417 |
| C | -1.7900185 | 0.4730408  | -2.4031712 |
| C | -2.2641098 | 2.8996874  | -3.0868966 |
| O | -2.6799483 | 3.8153966  | -3.8371535 |
| C | -0.4980570 | -0.3481851 | -2.7092159 |
| C | 0.8403043  | 0.3318025  | -2.6301344 |
| C | 1.1547254  | 1.4820441  | -3.3713183 |
| C | 2.3898326  | 2.1004723  | -3.2228189 |
| C | 3.3234666  | 1.5707952  | -2.3237834 |
| C | 3.0281221  | 0.4251413  | -1.5776010 |
| C | 1.7907017  | -0.1868205 | -1.7404983 |
| O | -1.9149753 | 3.3432328  | -1.8046385 |
| C | -1.7146481 | 1.0526431  | -0.9833478 |
| C | -1.1521430 | 2.4646169  | -0.9890051 |
| S | -0.7678867 | -1.2507800 | -4.3124258 |
| C | -0.0866653 | -0.2634496 | -5.6579782 |
| C | 0.4866277  | -2.5410906 | -4.2114067 |
| C | 4.6030055  | 2.2103965  | -2.1677282 |
| N | 5.6332123  | 2.7243105  | -2.0420824 |

|   |            |            |            |
|---|------------|------------|------------|
| H | -2.4839986 | 1.2581339  | -4.3769998 |
| H | -2.5698524 | -0.3044810 | -2.3879192 |
| H | -0.4910559 | -1.2036826 | -2.0215800 |
| H | 0.4237673  | 1.9085492  | -4.0480112 |
| H | 2.6305476  | 2.9913784  | -3.7933913 |
| H | 3.7581804  | 0.0224170  | -0.8834649 |
| H | 1.5551718  | -1.0762801 | -1.1623921 |
| H | -1.1103507 | 0.4208213  | -0.3209823 |
| H | -2.7293013 | 1.0867330  | -0.5708620 |
| H | -0.1074795 | 2.4700612  | -1.3248154 |
| H | -1.1808087 | 2.8891630  | 0.0189158  |
| H | -0.2324310 | -0.8614761 | -6.5607233 |
| H | -0.6551508 | 0.6638825  | -5.7299332 |
| H | 0.9748230  | -0.0778682 | -5.4892106 |
| H | 0.4752275  | -3.0771134 | -5.1623146 |
| H | 0.2082622  | -3.2145426 | -3.3993780 |
| H | 1.4649121  | -2.0888809 | -4.0341919 |

5a\_sy\_tr\_8.log

E = -1184.833795  
H = -1184.521780  
G = -1184.589014

NImag=0

|   |            |            |            |
|---|------------|------------|------------|
| C | -2.0082116 | 1.6006974  | -3.4600673 |
| C | -1.6656051 | 0.6234031  | -2.3682229 |
| C | -2.2825154 | 2.9475575  | -3.2690926 |
| O | -2.4743500 | 3.8287322  | -4.1409627 |
| C | -0.4201954 | -0.2656774 | -2.6266551 |
| C | 0.9505127  | 0.3553758  | -2.5722466 |
| C | 1.2457470  | 1.5853084  | -3.1801273 |
| C | 2.5202406  | 2.1289888  | -3.0848575 |
| C | 3.5149165  | 1.4394357  | -2.3797718 |
| C | 3.2377198  | 0.2131338  | -1.7674464 |
| C | 1.9567721  | -0.3178295 | -1.8676831 |
| O | -2.3600559 | 3.4273287  | -1.9515431 |
| C | -1.4795775 | 1.3634778  | -1.0395609 |
| C | -2.5401964 | 2.4445818  | -0.9414134 |
| S | -0.7033436 | -1.1901917 | -4.2229397 |
| C | 0.2189304  | -0.3231245 | -5.5075823 |
| C | 0.3517158  | -2.6357576 | -4.0106170 |
| C | 4.8361459  | 2.0012985  | -2.2808206 |
| N | 5.8994775  | 2.4530728  | -2.2005842 |
| H | -2.0549230 | 1.2576743  | -4.4906226 |
| H | -2.4746213 | -0.1125473 | -2.2169048 |
| H | -0.4506234 | -1.0976968 | -1.9122759 |
| H | 0.4694023  | 2.1171234  | -3.7201603 |
| H | 2.7476926  | 3.0815750  | -3.5519673 |
| H | 4.0135238  | -0.3116044 | -1.2199478 |
| H | 1.7337691  | -1.2656992 | -1.3852261 |
| H | -0.4987158 | 1.8513557  | -0.9998413 |
| H | -1.5502155 | 0.6731755  | -0.1917912 |
| H | -2.4804471 | 2.9735624  | 0.0135679  |
| H | -3.5446887 | 2.0034399  | -1.0307198 |
| H | 0.0559188  | -0.8929272 | -6.4250921 |
| H | -0.1916944 | 0.6810277  | -5.6146667 |
| H | 1.2792596  | -0.2969683 | -5.2514767 |
| H | 0.3181454  | -3.1952358 | -4.9476024 |
| H | -0.0640339 | -3.2370434 | -3.2007536 |
| H | 1.3728241  | -2.3192232 | -3.7881249 |

5a\_sy\_tr\_9.log

E = -1184.825549  
H = -1184.513189  
G = -1184.578730

NImag=0

|   |            |            |            |
|---|------------|------------|------------|
| C | -2.4313921 | 1.1600003  | -1.9699324 |
| C | -1.0267526 | 1.6320953  | -2.2534167 |
| C | -3.5529588 | 1.5424304  | -2.6872126 |
| O | -4.6820435 | 0.9980099  | -2.7187588 |
| C | -0.1078459 | 0.4105069  | -2.5180654 |
| C | 1.3893841  | 0.6101025  | -2.4042851 |
| C | 2.0653076  | 1.6431713  | -3.0672042 |
| C | 3.4351549  | 1.8084679  | -2.9050228 |
| C | 4.1410336  | 0.9300839  | -2.0745948 |
| C | 3.4840297  | -0.1105024 | -1.4102977 |
| C | 2.1130116  | -0.2617997 | -1.5814549 |
| O | -3.4413573 | 2.6726292  | -3.5120697 |
| C | -1.0252006 | 2.7308614  | -3.3278320 |
| C | -2.3260732 | 3.5100057  | -3.2468774 |
| S | -0.4036224 | -0.6082861 | -4.0674933 |
| C | -2.0965509 | -0.3800688 | -4.6690276 |
| C | 0.5411820  | 0.1299453  | -5.4174578 |
| C | 5.5603258  | 1.0990467  | -1.9049174 |
| N | 6.7022749  | 1.2347890  | -1.7693662 |
| H | -2.5446409 | 0.2768457  | -1.3457441 |
| H | -0.5561081 | 2.0520309  | -1.3469735 |
| H | -0.3862638 | -0.3391729 | -1.7707023 |
| H | 1.5334983  | 2.3184449  | -3.7273331 |
| H | 3.9571306  | 2.6091831  | -3.4180852 |
| H | 4.0398983  | -0.7866834 | -0.7696100 |
| H | 1.5961776  | -1.0656793 | -1.0648482 |
| H | -0.9520439 | 2.3136508  | -4.3373240 |
| H | -0.1874911 | 3.4211181  | -3.1963740 |
| H | -2.3524947 | 4.3042401  | -3.9977206 |
| H | -2.4345762 | 3.9667168  | -2.2520560 |
| H | -2.1417745 | -0.9849833 | -5.5785050 |
| H | -2.7833923 | -0.7657292 | -3.9171079 |
| H | -2.3049367 | 0.6672882  | -4.8850784 |
| H | 0.2523575  | -0.4326812 | -6.3082924 |
| H | 1.6003509  | -0.0307066 | -5.2173828 |
| H | 0.3128019  | 1.1877284  | -5.5432758 |

5a\_sy\_tr\_9\_ts1.log

E = -1184.803884  
H = -1184.494072  
G = -1184.561259

NImag=1

|   |            |            |            |
|---|------------|------------|------------|
| C | -2.6588743 | -0.8225369 | -1.2146885 |
| C | -1.2936033 | -1.0383330 | -1.0102089 |
| C | -3.6185533 | -0.9388129 | -0.1584487 |
| O | -4.7741418 | -0.5194767 | -0.1725297 |
| C | -0.1850232 | 0.7961217  | -0.9656154 |
| C | 1.1698127  | 0.4884921  | -0.5650135 |
| C | 1.6845580  | 0.5839956  | 0.7492362  |
| C | 2.9639784  | 0.1482599  | 1.0548294  |
| C | 3.7763190  | -0.4126959 | 0.0584692  |
| C | 3.2882698  | -0.5234872 | -1.2549150 |
| C | 2.0154138  | -0.0758593 | -1.5548033 |
| O | -3.2148251 | -1.5872014 | 0.9869987  |
| C | -0.8856981 | -1.7213674 | 0.2843524  |
| C | -2.0817355 | -2.4587170 | 0.8565555  |

|   |            |            |            |
|---|------------|------------|------------|
| S | -1.2045839 | 2.0001795  | -0.2015344 |
| C | -1.6860345 | 1.4638560  | 1.4572447  |
| C | -0.1949351 | 3.4457142  | 0.2102259  |
| C | 5.0958596  | -0.8664916 | 0.3780803  |
| N | 6.1653100  | -1.2353748 | 0.6366476  |
| H | -3.0288383 | -0.4318423 | -2.1566151 |
| H | -0.6778960 | -1.2490248 | -1.8807928 |
| H | -0.3136226 | 0.9537413  | -2.0341210 |
| H | 1.0890264  | 0.9999052  | 1.5534359  |
| H | 3.3385299  | 0.2369460  | 2.0698839  |
| H | 3.9148812  | -0.9528117 | -2.0305818 |
| H | 1.6501129  | -0.1550719 | -2.5751912 |
| H | -0.5181102 | -1.0018540 | 1.0238168  |
| H | -0.0707243 | -2.4297214 | 0.1054494  |
| H | -1.8798257 | -2.8331778 | 1.8617981  |
| H | -2.3628599 | -3.3019592 | 0.2138631  |
| H | -2.3415346 | 2.2507658  | 1.8374696  |
| H | -2.2488247 | 0.5344581  | 1.3750880  |
| H | -0.8256128 | 1.3437397  | 2.1135965  |
| H | -0.8518995 | 4.1711088  | 0.6953240  |
| H | 0.1816319  | 3.8506298  | -0.7302831 |
| H | 0.6277494  | 3.1690598  | 0.8705083  |

5a\_sy\_tr\_prod\_1.log

E = -706.950863

H = -706.722074

G = -706.776810

NImag=0

|   |            |            |            |
|---|------------|------------|------------|
| C | 0.5069355  | -2.1959269 | -0.0494030 |
| C | -0.5953520 | -2.2416657 | 0.9669502  |
| C | -0.7077059 | -1.2818370 | -0.1858861 |
| C | -0.5469012 | 0.1842108  | -0.0097715 |
| C | -1.3069952 | 1.0500693  | -0.8075423 |
| C | -1.1995862 | 2.4283035  | -0.6711124 |
| C | -0.3175617 | 2.9561368  | 0.2787118  |
| C | 0.4511999  | 2.1056391  | 1.0848041  |
| C | 0.3333266  | 0.7307192  | 0.9364325  |
| H | -1.4235317 | -1.5626358 | -0.9551021 |
| H | 1.4476453  | -1.7090585 | 0.1855681  |
| H | -0.3664252 | -1.8054201 | 1.9349535  |
| C | -1.4597432 | -3.4945176 | 0.9537071  |
| C | -0.6522009 | -4.6624531 | 0.4284595  |
| O | -0.1222553 | -4.3860205 | -0.8915762 |
| C | 0.6286465  | -3.2848012 | -1.0617672 |
| O | 1.3393818  | -3.1978127 | -2.0397831 |
| C | -0.1990730 | 4.3805005  | 0.4282579  |
| N | -0.1038351 | 5.5289434  | 0.5491077  |
| H | -1.9900617 | 0.6361935  | -1.5436319 |
| H | -1.7912559 | 3.0926351  | -1.2925133 |
| H | 1.1328948  | 2.5240987  | 1.8181525  |
| H | 0.9375124  | 0.0837823  | 1.5665670  |
| H | -1.8005687 | -3.7307725 | 1.9650496  |
| H | -2.3475702 | -3.3514402 | 0.3288625  |
| H | 0.1892178  | -4.8905040 | 1.0914250  |
| H | -1.2575376 | -5.5601662 | 0.3015800  |

5a\_sy\_tr\_prod\_2.log

E = -706.954244

H = -706.725206

G = -706.779210



NImag=0

|   |            |            |            |
|---|------------|------------|------------|
| C | 0.1099381  | -2.1895452 | 1.0736431  |
| C | -1.3087383 | -2.1875806 | 0.5796610  |
| C | -0.2971978 | -1.3377798 | -0.1297723 |
| C | -0.2908471 | 0.1422005  | 0.0170194  |
| C | -0.7080152 | 0.7788416  | 1.1954929  |
| C | -0.6922198 | 2.1629909  | 1.2980704  |
| C | -0.2547187 | 2.9316451  | 0.2112712  |
| C | 0.1644799  | 2.3132133  | -0.9722513 |
| C | 0.1435392  | 0.9269274  | -1.0594399 |
| H | 0.0471643  | -1.6756798 | -1.1019079 |
| H | 0.3672043  | -1.6458382 | 1.9758407  |
| H | -2.0293177 | -1.6655295 | 1.2028148  |
| C | -1.7778323 | -3.4779797 | -0.0511006 |
| C | -0.6523087 | -4.1761415 | -0.7919533 |
| O | 0.5294520  | -4.3527418 | 0.0218094  |
| C | 0.9384244  | -3.4089114 | 0.8844647  |
| O | 1.9580623  | -3.6026041 | 1.5145225  |
| C | -0.2364374 | 4.3651737  | 0.3133434  |
| N | -0.2217012 | 5.5208206  | 0.3955766  |
| H | -1.0497978 | 0.1968354  | 2.0467164  |
| H | -1.0155870 | 2.6510799  | 2.2116907  |
| H | 0.5030779  | 2.9142815  | -1.8098569 |
| H | 0.4690025  | 0.4433001  | -1.9758423 |
| H | -2.1631511 | -4.1362304 | 0.7351540  |
| H | -2.5884569 | -3.2954885 | -0.7636618 |
| H | -0.9441375 | -5.1865686 | -1.0791239 |
| H | -0.3636803 | -3.6368908 | -1.6981810 |

5b.log

E = -383.756315  
H = -383.614988  
G = -383.654836

NImag=0

|   |            |            |            |
|---|------------|------------|------------|
| C | -0.5543808 | -2.8305788 | -0.3237583 |
| C | -0.0966583 | -1.4108977 | -0.1016110 |
| C | 1.4261135  | -1.3511223 | -0.1323697 |
| C | 1.9614055  | -2.3131699 | 0.9031749  |
| O | 1.5239881  | -3.6722632 | 0.6666735  |
| C | 0.3171077  | -3.9591022 | 0.1571711  |
| O | -0.0055399 | -5.1267600 | 0.0770339  |
| C | -1.6837240 | -3.1571902 | -0.9569658 |
| H | -0.4406024 | -1.0676466 | 0.8832050  |
| H | -0.5490478 | -0.7583341 | -0.8529134 |
| H | 1.8054461  | -1.6210478 | -1.1250217 |
| H | 1.7863987  | -0.3462972 | 0.1058081  |
| H | 3.0506035  | -2.3698926 | 0.8953869  |
| H | 1.6293607  | -2.0287813 | 1.9077936  |
| H | -1.9712345 | -4.1948947 | -1.0927730 |
| H | -2.3402351 | -2.3858203 | -1.3506331 |

5b\_c\_2\_r2\_ts2.log

E = -1224.122817  
H = -1223.782487  
G = -1223.853018

NImag=1

|   |            |           |            |
|---|------------|-----------|------------|
| C | 1.6457654  | 0.7775152 | 0.7502827  |
| C | 0.6439111  | 0.9538381 | -0.3419876 |
| C | -0.7033019 | 0.3306743 | -0.2762278 |
| C | -1.3552500 | 0.0146676 | -1.4795386 |

|   |            |            |            |
|---|------------|------------|------------|
| C | -2.6383132 | -0.5103603 | -1.4791930 |
| C | -3.2894602 | -0.7133317 | -0.2538921 |
| C | -2.6600658 | -0.3914163 | 0.9537686  |
| C | -1.3707811 | 0.1284226  | 0.9394287  |
| C | 2.0469395  | -0.6153931 | 0.3523373  |
| C | 3.1065289  | -0.7766626 | -0.7100730 |
| O | 1.8455170  | -2.9896739 | 0.6850906  |
| C | 1.4727581  | -1.6999578 | 1.0407012  |
| O | 0.6299949  | -1.6359006 | 1.9563166  |
| S | 0.0724600  | 3.0836349  | -0.5259754 |
| C | -0.4737904 | 3.4438211  | 1.1555787  |
| C | 1.6952120  | 3.8777009  | -0.5242577 |
| C | -4.6210616 | -1.2558586 | -0.2387309 |
| N | -5.6943269 | -1.6921340 | -0.2275461 |
| C | 3.0888229  | -2.1982882 | -1.2597290 |
| C | 3.0331190  | -3.1590938 | -0.0879392 |
| H | 2.4732225  | 1.4896151  | 0.6729724  |
| H | 1.2068179  | 0.8191626  | 1.7488250  |
| H | 1.0776851  | 0.9288157  | -1.3412586 |
| H | -0.8419873 | 0.1808382  | -2.4231975 |
| H | -3.1366955 | -0.7614111 | -2.4095814 |
| H | -3.1789554 | -0.5495910 | 1.8935694  |
| H | -0.8817771 | 0.3652628  | 1.8759146  |
| H | 2.9597414  | -0.0543779 | -1.5253108 |
| H | 4.1092519  | -0.5607415 | -0.3028099 |
| H | -0.5003297 | 4.5277454  | 1.2870125  |
| H | -1.4804914 | 3.0405397  | 1.2766897  |
| H | 0.2094468  | 2.9921922  | 1.8783249  |
| H | 1.5628714  | 4.9498502  | -0.6821049 |
| H | 2.2749983  | 3.4556259  | -1.3484096 |
| H | 2.2015410  | 3.6985819  | 0.4253982  |
| H | 2.2048012  | -2.3518689 | -1.8916009 |
| H | 3.9780579  | -2.4082773 | -1.8631259 |
| H | 3.9077866  | -3.0069774 | 0.5619861  |
| H | 3.0258517  | -4.2026482 | -0.4129223 |

5b\_c\_2\_r3\_ts2.log

E = -1224.124495

H = -1223.784351

G = -1223.855387

NImag=1

|   |            |            |            |
|---|------------|------------|------------|
| C | 1.6686723  | -0.5432791 | -1.1345668 |
| C | 0.7000334  | -0.9599346 | -0.0813551 |
| C | -0.6638231 | -0.3754967 | -0.0100514 |
| C | -1.2270195 | -0.1148231 | 1.2474901  |
| C | -2.5210685 | 0.3752663  | 1.3598546  |
| C | -3.2689196 | 0.5913061  | 0.1947005  |
| C | -2.7239693 | 0.3283790  | -1.0684323 |
| C | -1.4223296 | -0.1461831 | -1.1651890 |
| C | 2.0457296  | 0.7557315  | -0.4818832 |
| C | 3.1434966  | 0.7458653  | 0.5522813  |
| O | 1.6981316  | 3.1278689  | -0.2782990 |
| C | 1.3727941  | 1.9225314  | -0.8878425 |
| O | 0.4773451  | 1.9992083  | -1.7507295 |
| S | 0.2682966  | -3.0865372 | -0.3930063 |
| C | 1.8851378  | -3.7273152 | 0.0910381  |
| C | -0.6692132 | -3.4292409 | 1.1103569  |
| C | -4.6140672 | 1.0899228  | 0.2968504  |
| N | -5.6980120 | 1.4904097  | 0.3796064  |
| C | 3.0765810  | 2.0119234  | 1.3988434  |
| C | 2.9132247  | 3.1975283  | 0.4671533  |

|   |            |            |            |
|---|------------|------------|------------|
| H | 2.5133253  | -1.2368918 | -1.2164076 |
| H | 1.1999267  | -0.4109642 | -2.1121963 |
| H | 1.1513690  | -1.1150751 | 0.9002876  |
| H | -0.6373403 | -0.2908832 | 2.1434148  |
| H | -2.9534553 | 0.5867284  | 2.3321344  |
| H | -3.3167263 | 0.5012885  | -1.9606608 |
| H | -0.9960277 | -0.3425725 | -2.1426991 |
| H | 3.0679488  | -0.1441720 | 1.1940145  |
| H | 4.1374433  | 0.6824490  | 0.0771799  |
| H | 1.7773975  | -4.7752776 | 0.3778163  |
| H | 2.5492798  | -3.6533662 | -0.7711660 |
| H | 2.2825043  | -3.1448707 | 0.9276157  |
| H | -0.6987405 | -4.5095506 | 1.2667223  |
| H | -1.6838929 | -3.0537018 | 0.9663135  |
| H | -0.1983768 | -2.9348432 | 1.9643414  |
| H | 2.2162058  | 1.9701985  | 2.0790849  |
| H | 3.9806451  | 2.1429332  | 2.0025917  |
| H | 3.7608351  | 3.2419559  | -0.2330024 |
| H | 2.8698443  | 4.1441644  | 1.0119423  |

5b\_c\_2\_r4\_ts2.log

E = -1224.124738  
H = -1223.784455  
G = -1223.854489

NImag=1

|   |            |            |            |
|---|------------|------------|------------|
| C | -1.4454549 | -1.3708404 | 0.6858664  |
| C | -0.3779858 | -1.1822772 | -0.3407664 |
| C | 0.6537664  | -0.1296935 | -0.2272056 |
| C | 1.2174620  | 0.3815832  | -1.4091428 |
| C | 2.2421513  | 1.3139037  | -1.3665002 |
| C | 2.7243575  | 1.7366333  | -0.1191671 |
| C | 2.1782458  | 1.2365251  | 1.0683116  |
| C | 1.1421857  | 0.3109473  | 1.0119669  |
| C | -2.3158724 | -0.2249938 | 0.2563855  |
| C | -3.3066076 | -0.4540734 | -0.8592217 |
| O | -3.0009446 | 2.0609160  | 0.5649496  |
| C | -2.1982891 | 0.9934126  | 0.9475178  |
| O | -1.4191082 | 1.2406734  | 1.8894162  |
| S | 0.7922417  | -3.0765868 | -0.3222649 |
| C | 2.4129382  | -2.6376096 | -0.9827492 |
| C | 1.1990405  | -3.1897898 | 1.4309398  |
| C | 3.7933048  | 2.6966251  | -0.0593124 |
| N | 4.6555970  | 3.4688426  | -0.0117060 |
| C | -3.7918644 | 0.8795779  | -1.4159629 |
| C | -4.1393359 | 1.7837873  | -0.2492034 |
| H | -1.9380351 | -2.3453862 | 0.5766177  |
| H | -1.0775219 | -1.2568959 | 1.7080245  |
| H | -0.7251787 | -1.3306568 | -1.3619989 |
| H | 0.8425280  | 0.0380234  | -2.3698402 |
| H | 2.6709730  | 1.7119144  | -2.2799989 |
| H | 2.5606557  | 1.5764857  | 2.0251414  |
| H | 0.7035615  | -0.0531927 | 1.9320448  |
| H | -2.8637308 | -1.0583035 | -1.6628996 |
| H | -4.1759782 | -1.0320895 | -0.5012114 |
| H | 3.0776111  | -3.4964435 | -0.8651629 |
| H | 2.2960863  | -2.4073187 | -2.0434110 |
| H | 2.8146133  | -1.7732736 | -0.4476262 |
| H | 1.9340279  | -3.9865654 | 1.5643489  |
| H | 0.2875476  | -3.4396132 | 1.9762183  |
| H | 1.6086314  | -2.2402789 | 1.7843342  |
| H | -3.0022906 | 1.3541257  | -2.0123337 |

|   |            |           |            |
|---|------------|-----------|------------|
| H | -4.6707913 | 0.7527009 | -2.0565380 |
| H | -4.9173522 | 1.3128253 | 0.3701616  |
| H | -4.5086150 | 2.7578066 | -0.5803667 |

5b\_sy\_1.log

E = -1224.135225  
H = -1223.793214  
G = -1223.861724

NImag=0

|   |            |            |            |
|---|------------|------------|------------|
| C | 1.3301094  | -4.4298024 | -2.7788769 |
| C | 0.0877460  | -3.5226835 | -2.8756077 |
| C | -1.0989086 | -4.1260684 | -3.5997272 |
| C | -1.3979892 | -5.4888453 | -3.4884980 |
| C | -2.4889919 | -6.0276851 | -4.1618946 |
| C | -3.2850696 | -5.1946529 | -4.9554823 |
| C | -2.9974314 | -3.8296425 | -5.0772685 |
| C | -1.9063256 | -3.3057332 | -4.3965167 |
| C | 2.6192806  | -3.7385925 | -2.4501924 |
| C | 3.2652967  | -2.9249929 | -3.5475963 |
| O | 4.3975261  | -3.3163934 | -0.8964536 |
| C | 3.1466443  | -3.8736417 | -1.1822307 |
| O | 2.6053856  | -4.4287713 | -0.1778388 |
| S | -0.5970804 | -2.9219222 | -1.2570651 |
| C | -0.5533474 | -4.3624219 | -0.1752360 |
| C | 0.6708669  | -1.8790218 | -0.5040585 |
| C | -4.4123106 | -5.7480732 | -5.6583326 |
| N | -5.3197348 | -6.1928179 | -6.2239413 |
| C | 4.4124283  | -2.0882455 | -2.9882978 |
| C | 5.1969145  | -2.9454881 | -2.0122018 |
| H | 1.1393556  | -5.2468482 | -2.0751761 |
| H | 1.3916524  | -4.8885076 | -3.7797187 |
| H | 0.3489873  | -2.5751904 | -3.3616371 |
| H | -0.7791901 | -6.1396190 | -2.8785725 |
| H | -2.7223201 | -7.0838748 | -4.0777959 |
| H | -3.6202111 | -3.1946002 | -5.6984080 |
| H | -1.6738692 | -2.2478744 | -4.4870230 |
| H | 3.6457736  | -3.5704862 | -4.3588138 |
| H | 2.5284342  | -2.2606771 | -4.0263292 |
| H | -0.9808449 | -4.0374117 | 0.7762176  |
| H | -1.1886102 | -5.1346837 | -0.6137771 |
| H | 0.4890765  | -4.6786229 | -0.0608290 |
| H | 0.1776990  | -1.3708915 | 0.3278320  |
| H | 0.9866930  | -1.1467285 | -1.2493520 |
| H | 1.4955108  | -2.5050554 | -0.1587106 |
| H | 5.0717322  | -1.7215278 | -3.7822686 |
| H | 4.0209257  | -1.2173105 | -2.4467351 |
| H | 6.0601471  | -2.4148328 | -1.6006287 |
| H | 5.5591491  | -3.8533618 | -2.5199574 |

5b\_sy\_10.log

E = -1224.138547  
H = -1223.796811  
G = -1223.866860

NImag=0

|   |            |            |            |
|---|------------|------------|------------|
| C | 0.9430015  | -2.1070206 | -2.3898781 |
| C | -0.4059288 | -2.7037484 | -1.9117415 |
| C | -1.0253474 | -3.6354240 | -2.9243544 |
| C | -0.6158962 | -4.9669847 | -3.0728941 |
| C | -1.1556247 | -5.7623165 | -4.0762787 |
| C | -2.1131200 | -5.2212300 | -4.9427144 |

|   |            |            |            |
|---|------------|------------|------------|
| C | -2.5365893 | -3.8946394 | -4.8022227 |
| C | -1.9931924 | -3.1133118 | -3.7894214 |
| C | 2.0133940  | -3.0874278 | -2.7670517 |
| C | 2.2598005  | -3.3837283 | -4.2281509 |
| O | 3.7807928  | -4.5359569 | -2.0175538 |
| C | 2.7787165  | -3.6027836 | -1.7381100 |
| O | 2.6809649  | -3.3116244 | -0.5090853 |
| S | -0.1983734 | -3.5972754 | -0.3106015 |
| C | 0.1962881  | -2.2478608 | 0.8146129  |
| C | -1.9354851 | -3.8585653 | 0.1125715  |
| C | -2.6722207 | -6.0398235 | -5.9853862 |
| N | -3.1222605 | -6.6980533 | -6.8254573 |
| C | 3.6033011  | -4.0886518 | -4.4011452 |
| C | 3.7425686  | -5.1330711 | -3.3079763 |
| H | 0.6651575  | -1.4921809 | -3.2574332 |
| H | 1.2817918  | -1.4116063 | -1.6098554 |
| H | -1.1087375 | -1.8949753 | -1.6777387 |
| H | 0.1384186  | -5.3882423 | -2.4148892 |
| H | -0.8371011 | -6.7928820 | -4.1934017 |
| H | -3.2836797 | -3.4873329 | -5.4753299 |
| H | -2.3176396 | -2.0830045 | -3.6729373 |
| H | 1.4668487  | -4.0140410 | -4.6684402 |
| H | 2.2511161  | -2.4513956 | -4.8133560 |
| H | 0.0616087  | -2.6338145 | 1.8271002  |
| H | 1.2424085  | -2.0018749 | 0.6351789  |
| H | -0.4769871 | -1.4082514 | 0.6295373  |
| H | -1.9663556 | -4.2207449 | 1.1420611  |
| H | -2.3352757 | -4.6234197 | -0.5553242 |
| H | -2.4913271 | -2.9238252 | 0.0137416  |
| H | 3.6876832  | -4.5648544 | -5.3839559 |
| H | 4.4276862  | -3.3710454 | -4.3027757 |
| H | 4.6710447  | -5.7034358 | -3.4025902 |
| H | 2.8979497  | -5.8389754 | -3.3579523 |

5b\_sy\_10\_ts1.log

E = -1224.108368

H = -1223.769279

G = -1223.838480

NImag=1

|   |            |            |            |
|---|------------|------------|------------|
| C | 1.2148777  | 0.9291665  | 1.5787361  |
| C | 1.4844360  | -1.0858084 | 0.7368845  |
| C | 0.1309818  | -1.3573475 | 0.3343443  |
| C | -0.4332259 | -0.8223745 | -0.8502553 |
| C | -1.7850971 | -0.9570555 | -1.1232902 |
| C | -2.6270830 | -1.6080917 | -0.2092622 |
| C | -2.0883471 | -2.1484867 | 0.9750405  |
| C | -0.7379669 | -2.0255359 | 1.2342876  |
| C | 0.2469401  | 1.6490057  | 0.9042631  |
| C | -1.1891422 | 1.7249291  | 1.3750892  |
| O | -0.2449438 | 2.9444467  | -1.0898782 |
| C | 0.6491990  | 2.2189765  | -0.3604317 |
| O | 1.7799887  | 2.1079098  | -0.8442837 |
| S | 2.6556906  | -1.0102099 | -0.5688580 |
| C | 4.0364420  | -0.0272031 | 0.0459584  |
| C | 3.4456179  | -2.6425008 | -0.5508100 |
| C | -4.0256132 | -1.7336057 | -0.4852147 |
| N | -5.1603911 | -1.8361433 | -0.7073004 |
| C | -1.8557960 | 2.9516914  | 0.7607706  |
| C | -1.6379892 | 2.9155991  | -0.7378542 |
| H | 0.9723591  | 0.5272386  | 2.5611601  |
| H | 2.2613373  | 1.1539325  | 1.4143047  |

|   |            |            |            |
|---|------------|------------|------------|
| H | 1.8754329  | -1.6343567 | 1.5936528  |
| H | 0.1943380  | -0.2935463 | -1.5620779 |
| H | -2.2006687 | -0.5428483 | -2.0371231 |
| H | -2.7380838 | -2.6611561 | 1.6778273  |
| H | -0.3281543 | -2.4412297 | 2.1508749  |
| H | -1.7630521 | 0.8330059  | 1.0793437  |
| H | -1.2198282 | 1.7724271  | 2.4697051  |
| H | 4.8926225  | -0.2535391 | -0.5929010 |
| H | 3.7567776  | 1.0211197  | -0.0553983 |
| H | 4.2498979  | -0.2983953 | 1.0822102  |
| H | 4.2464124  | -2.6465205 | -1.2937634 |
| H | 2.6806261  | -3.3730902 | -0.8186488 |
| H | 3.8391025  | -2.8411778 | 0.4484509  |
| H | -2.9318345 | 2.9663139  | 0.9615782  |
| H | -1.4220984 | 3.8726239  | 1.1698384  |
| H | -2.0758396 | 3.7814646  | -1.2389974 |
| H | -2.0816328 | 2.0056030  | -1.1636248 |

5b\_sy\_11.log

E = -1224.135620

H = -1223.793419

G = -1223.861248

NImag=0

|   |            |            |            |
|---|------------|------------|------------|
| C | 1.2679446  | -2.1621377 | -2.7073177 |
| C | -0.1908221 | -2.4703701 | -2.2919009 |
| C | -0.9611589 | -3.4486517 | -3.1411117 |
| C | -0.4846756 | -4.7364956 | -3.4292766 |
| C | -1.2174063 | -5.5958206 | -4.2386231 |
| C | -2.4413590 | -5.1692585 | -4.7684753 |
| C | -2.9332904 | -3.8897514 | -4.4906606 |
| C | -2.1903506 | -3.0419416 | -3.6774686 |
| C | 2.2747609  | -3.2755912 | -2.7558248 |
| C | 2.6703155  | -3.8476654 | -4.0969996 |
| O | 3.8924925  | -4.5898968 | -1.5538089 |
| C | 2.8634115  | -3.6427862 | -1.5629544 |
| O | 2.5432789  | -3.2232832 | -0.4107701 |
| S | -0.2873429 | -2.8621988 | -0.4754128 |
| C | -2.0748360 | -2.7737292 | -0.2255363 |
| C | -0.0704877 | -4.6412032 | -0.2833602 |
| C | -3.2024357 | -6.0579796 | -5.6060554 |
| N | -3.8150685 | -6.7735464 | -6.2798302 |
| C | 3.5050725  | -5.1092255 | -3.8997905 |
| C | 4.5226106  | -4.8476729 | -2.8029386 |
| H | 1.1664690  | -1.7101224 | -3.7041691 |
| H | 1.6018144  | -1.3615339 | -2.0323458 |
| H | -0.7347374 | -1.5178114 | -2.2912272 |
| H | 0.4670317  | -5.0630861 | -3.0232961 |
| H | -0.8468441 | -6.5910515 | -4.4617747 |
| H | -3.8824648 | -3.5674991 | -4.9055953 |
| H | -2.5686457 | -2.0472622 | -3.4576252 |
| H | 1.7823482  | -4.0809082 | -4.7033661 |
| H | 3.2497779  | -3.1222313 | -4.6948760 |
| H | -2.2641312 | -3.0504198 | 0.8138440  |
| H | -2.3892814 | -1.7419892 | -0.3928723 |
| H | -2.5960624 | -3.4567010 | -0.8992345 |
| H | -0.1313119 | -4.8302481 | 0.7910304  |
| H | 0.9226367  | -4.8973043 | -0.6470481 |
| H | -0.8652582 | -5.1722165 | -0.8095295 |
| H | 2.8641840  | -5.9455357 | -3.5894345 |
| H | 4.0193927  | -5.4039789 | -4.8209148 |
| H | 5.1510986  | -3.9858881 | -3.0776272 |

H 5.1764307 -5.7088066 -2.6379216

5b\_sy\_12.log

E = -1224.131082

H = -1223.789338

G = -1223.859022

NImag=0

|   |            |            |            |
|---|------------|------------|------------|
| C | 1.3575374  | -4.5016087 | -2.9650290 |
| C | 0.0858977  | -3.6546094 | -2.8194015 |
| C | -1.1206297 | -4.1991059 | -3.5539018 |
| C | -1.8974574 | -3.3271273 | -4.3254060 |
| C | -3.0076857 | -3.7894619 | -5.0214537 |
| C | -3.3473585 | -5.1447864 | -4.9393991 |
| C | -2.5841274 | -6.0298443 | -4.1690722 |
| C | -1.4735384 | -5.5526170 | -3.4826792 |
| C | 2.6086169  | -3.9845743 | -2.3050598 |
| C | 3.5006775  | -5.0048583 | -1.6325729 |
| O | 4.1614315  | -2.1918202 | -1.9045473 |
| C | 2.9591620  | -2.6561823 | -2.4568610 |
| O | 2.2849898  | -1.7421067 | -3.0168725 |
| S | -0.4630974 | -3.3513583 | -1.0699026 |
| C | 0.0253714  | -4.8274961 | -0.1623050 |
| C | 0.6545430  | -2.1003605 | -0.3973294 |
| C | -4.4945018 | -5.6346833 | -5.6568355 |
| N | -5.4178445 | -6.0287818 | -6.2341820 |
| C | 4.5603532  | -4.3113370 | -0.7831599 |
| C | 5.1457022  | -3.1684401 | -1.5910570 |
| H | 1.1576248  | -5.5177152 | -2.6002464 |
| H | 1.4581638  | -4.6027825 | -4.0609423 |
| H | 0.3070598  | -2.6365144 | -3.1539349 |
| H | -1.6261335 | -2.2767400 | -4.3832870 |
| H | -3.6054488 | -3.1134225 | -5.6237692 |
| H | -2.8584480 | -7.0780799 | -4.1143184 |
| H | -0.8835822 | -6.2476307 | -2.8925543 |
| H | 2.9093216  | -5.6884002 | -1.0035569 |
| H | 4.0064153  | -5.6579652 | -2.3661031 |
| H | -0.2656835 | -4.6635886 | 0.8772333  |
| H | -0.5261501 | -5.6766628 | -0.5696742 |
| H | 1.1032231  | -4.9670583 | -0.2495194 |
| H | 0.1082535  | -1.5868494 | 0.3951723  |
| H | 0.9122533  | -1.4192150 | -1.2133353 |
| H | 1.5559571  | -2.5841242 | -0.0219491 |
| H | 4.1090393  | -3.9014336 | 0.1300122  |
| H | 5.3560569  | -5.0025639 | -0.4847838 |
| H | 5.5822794  | -3.5585697 | -2.5240677 |
| H | 5.9305565  | -2.6394241 | -1.0426483 |

5b\_sy\_13.log

E = -1224.131723

H = -1223.789706

G = -1223.857915

NImag=0

|   |            |            |            |
|---|------------|------------|------------|
| C | 1.0504609  | -2.2121022 | -2.4419840 |
| C | -0.4440335 | -2.5257489 | -2.1780401 |
| C | -1.1352777 | -3.4757135 | -3.1307678 |
| C | -0.6897767 | -4.7908508 | -3.3256094 |
| C | -1.3456622 | -5.6338277 | -4.2137706 |
| C | -2.4588962 | -5.1600358 | -4.9185001 |
| C | -2.9155961 | -3.8502511 | -4.7374530 |
| C | -2.2523984 | -3.0201871 | -3.8410367 |

|   |            |            |            |
|---|------------|------------|------------|
| C | 2.0497787  | -3.3162086 | -2.6318401 |
| C | 2.3221563  | -3.7825814 | -4.0451877 |
| O | 3.8637337  | -4.6136843 | -1.7296590 |
| C | 2.8227536  | -3.6961894 | -1.5514880 |
| O | 2.6832781  | -3.3280252 | -0.3454668 |
| S | -0.9086191 | -3.0435894 | -0.4563665 |
| C | -0.1088888 | -4.6121499 | -0.0652962 |
| C | 0.0340148  | -1.9146121 | 0.5855019  |
| C | -3.1396395 | -6.0317768 | -5.8393333 |
| N | -3.6871403 | -6.7338834 | -6.5799318 |
| C | 3.2014278  | -5.0273667 | -4.0344780 |
| C | 4.3395572  | -4.7974336 | -3.0572729 |
| H | 1.0014834  | -1.6069196 | -3.3613742 |
| H | 1.3740907  | -1.5269362 | -1.6490945 |
| H | -0.9846868 | -1.5715145 | -2.2102800 |
| H | 0.1910328  | -5.1466529 | -2.8005554 |
| H | -0.9979083 | -6.6502536 | -4.3671486 |
| H | -3.7779553 | -3.4916045 | -5.2894425 |
| H | -2.6054185 | -2.0033673 | -3.6936996 |
| H | 1.3867739  | -3.9927893 | -4.5813324 |
| H | 2.8238798  | -2.9941218 | -4.6345184 |
| H | -0.3548015 | -4.7959012 | 0.9841083  |
| H | -0.5617934 | -5.3922408 | -0.6770929 |
| H | 0.9711916  | -4.5133189 | -0.1990769 |
| H | -0.2894470 | -2.1003261 | 1.6118750  |
| H | -0.2302983 | -0.8960322 | 0.2946966  |
| H | 1.0981451  | -2.1293165 | 0.4481397  |
| H | 2.6228947  | -5.9007470 | -3.7045387 |
| H | 3.6049062  | -5.2472777 | -5.0288933 |
| H | 4.9157106  | -3.9096724 | -3.3621930 |
| H | 5.0233677  | -5.6500894 | -3.0154992 |

5b\_sy\_14.log

E = -1224.135393

H = -1223.793605

G = -1223.864315

NImag=0

|   |            |            |            |
|---|------------|------------|------------|
| C | 1.4766511  | -4.6778125 | -1.3786580 |
| C | 0.1403994  | -3.9149456 | -1.4276011 |
| C | -0.6446891 | -4.1619604 | -2.6901017 |
| C | -1.1578360 | -5.4306756 | -2.9876102 |
| C | -1.8316582 | -5.6554250 | -4.1810306 |
| C | -1.9796338 | -4.6012302 | -5.0920486 |
| C | -1.4687669 | -3.3297999 | -4.8092727 |
| C | -0.8119842 | -3.1162746 | -3.6018945 |
| C | 2.3827192  | -4.1150885 | -2.4414129 |
| C | 2.5095497  | -4.8401046 | -3.7620997 |
| O | 3.7129228  | -2.2446385 | -3.1579788 |
| C | 2.8790270  | -2.8425343 | -2.2046708 |
| O | 2.6606780  | -2.1233140 | -1.1906250 |
| S | -0.9416725 | -4.3597479 | 0.0179297  |
| C | -0.0674550 | -3.5624956 | 1.3792466  |
| C | -2.3221118 | -3.2190528 | -0.1976419 |
| C | -2.6669219 | -4.8290965 | -6.3354758 |
| N | -3.2206603 | -5.0122244 | -7.3360315 |
| C | 3.0909025  | -3.9039001 | -4.8186822 |
| C | 4.2080100  | -3.0932676 | -4.1853400 |
| H | 1.9122848  | -4.5518590 | -0.3801818 |
| H | 1.2917507  | -5.7482135 | -1.5358977 |
| H | 0.3468228  | -2.8472211 | -1.2936102 |
| H | -1.0218694 | -6.2566018 | -2.2933780 |



|   |            |            |            |
|---|------------|------------|------------|
| H | -2.2314261 | -6.6364310 | -4.4150201 |
| H | -1.5887980 | -2.5230091 | -5.5247864 |
| H | -0.4131067 | -2.1328218 | -3.3694476 |
| H | 3.1486980  | -5.7365444 | -3.6828229 |
| H | 1.5283324  | -5.2089875 | -4.1003568 |
| H | -0.7443205 | -3.5610181 | 2.2357156  |
| H | 0.8177544  | -4.1547209 | 1.6109133  |
| H | 0.2004846  | -2.5441419 | 1.0906732  |
| H | -2.9100197 | -3.2428409 | 0.7219540  |
| H | -2.9259387 | -3.5758172 | -1.0334349 |
| H | -1.9349917 | -2.2158956 | -0.3897160 |
| H | 3.4728722  | -4.4556813 | -5.6844145 |
| H | 2.3193299  | -3.2086974 | -5.1756172 |
| H | 4.6974772  | -2.4355963 | -4.9094680 |
| H | 4.9685935  | -3.7710123 | -3.7659047 |

5b\_sy\_15.log

E = -1224.135189  
H = -1223.793498  
G = -1223.864678

NImag=0

|   |            |            |            |
|---|------------|------------|------------|
| C | 1.4917127  | -4.6507434 | -1.3309080 |
| C | 0.1531730  | -3.8970519 | -1.3969170 |
| C | -0.6028549 | -4.1258392 | -2.6814000 |
| C | -1.0340435 | -5.4074246 | -3.0445862 |
| C | -1.6878836 | -5.6142876 | -4.2526248 |
| C | -1.9008906 | -4.5274484 | -5.1100590 |
| C | -1.4735344 | -3.2415435 | -4.7602040 |
| C | -0.8339679 | -3.0481975 | -3.5404978 |
| C | 2.3862978  | -4.1227094 | -2.4210010 |
| C | 2.5713844  | -4.9342277 | -3.6806783 |
| O | 3.6300235  | -2.2472177 | -3.2703104 |
| C | 2.8853549  | -2.8423822 | -2.2401387 |
| O | 2.7604797  | -2.1188222 | -1.2144110 |
| S | -0.9675415 | -4.3845872 | 0.0063643  |
| C | -0.1166926 | -3.6737853 | 1.4284743  |
| C | -2.3216371 | -3.2089180 | -0.1866308 |
| C | -2.5673478 | -4.7368762 | -6.3681080 |
| N | -3.1040118 | -4.9055768 | -7.3804215 |
| C | 3.6764537  | -4.3230441 | -4.5381819 |
| C | 3.4813759  | -2.8176034 | -4.5642341 |
| H | 1.9319524  | -4.4890355 | -0.3393908 |
| H | 1.3143364  | -5.7270315 | -1.4522072 |
| H | 0.3424456  | -2.8291930 | -1.2394878 |
| H | -0.8497394 | -6.2557073 | -2.3900011 |
| H | -2.0231285 | -6.6058337 | -4.5378131 |
| H | -1.6433991 | -2.4093453 | -5.4352560 |
| H | -0.4985889 | -2.0544551 | -3.2571411 |
| H | 2.8191835  | -5.9788430 | -3.4381471 |
| H | 1.6451368  | -4.9840021 | -4.2833947 |
| H | -0.8208856 | -3.6928017 | 2.2625481  |
| H | 0.7443707  | -4.3001493 | 1.6611953  |
| H | 0.1866029  | -2.6507331 | 1.1966380  |
| H | -2.9353071 | -3.2690810 | 0.7142155  |
| H | -2.9076499 | -3.5108827 | -1.0559380 |
| H | -1.9123044 | -2.2046081 | -0.3155618 |
| H | 4.6616266  | -4.5405693 | -4.1063546 |
| H | 3.6610926  | -4.7189600 | -5.5594942 |
| H | 2.4774982  | -2.5813105 | -4.9536497 |
| H | 4.2199072  | -2.3203714 | -5.1998854 |

5b\_sy\_16.log

E = -1224.131624

H = -1223.789904

G = -1223.859344

NImag=0

|   |            |            |            |
|---|------------|------------|------------|
| C | 1.3647764  | -4.5168745 | -3.0025048 |
| C | 0.1018212  | -3.6678150 | -2.8270044 |
| C | -1.1225731 | -4.2041698 | -3.5371344 |
| C | -1.4663537 | -5.5606468 | -3.4818406 |
| C | -2.5979369 | -6.0293447 | -4.1391945 |
| C | -3.3912929 | -5.1327113 | -4.8644689 |
| C | -3.0599353 | -3.7744446 | -4.9309622 |
| C | -1.9283335 | -3.3207748 | -4.2644707 |
| C | 2.6287320  | -4.0034197 | -2.3658504 |
| C | 3.5757784  | -5.0490265 | -1.8176331 |
| O | 4.1090853  | -2.1868428 | -1.8454817 |
| C | 2.9557492  | -2.6660795 | -2.4800365 |
| O | 2.3045112  | -1.7620600 | -3.0832519 |
| S | -0.4094142 | -3.3817369 | -1.0612868 |
| C | 0.0923891  | -4.8730114 | -0.1857851 |
| C | 0.7203033  | -2.1361501 | -0.3953790 |
| C | -4.5606774 | -5.6140770 | -5.5514316 |
| N | -5.5018354 | -6.0014747 | -6.1040165 |
| C | 4.9451707  | -4.4390032 | -1.5311877 |
| C | 4.7351346  | -3.0656571 | -0.9209645 |
| H | 1.1693794  | -5.5327632 | -2.6344337 |
| H | 1.4463319  | -4.6199561 | -4.1001378 |
| H | 0.3166999  | -2.6465421 | -3.1576933 |
| H | -0.8528626 | -6.2635692 | -2.9257641 |
| H | -2.8660221 | -7.0796771 | -4.0955710 |
| H | -3.6806362 | -3.0891719 | -5.4986675 |
| H | -1.6631323 | -2.2683074 | -4.3105318 |
| H | 3.1894444  | -5.5130556 | -0.8921461 |
| H | 3.6857695  | -5.8796478 | -2.5323607 |
| H | -0.1603171 | -4.7157955 | 0.8647261  |
| H | -0.4862256 | -5.7095782 | -0.5821091 |
| H | 1.1644695  | -5.0279347 | -0.3123130 |
| H | 0.1685408  | -1.5915583 | 0.3721953  |
| H | 1.0087707  | -1.4788866 | -1.2213718 |
| H | 1.6017260  | -2.6288181 | 0.0144996  |
| H | 5.5345550  | -5.0673792 | -0.8550390 |
| H | 5.5143648  | -4.3196897 | -2.4617043 |
| H | 5.6795360  | -2.5889339 | -0.6432340 |
| H | 4.1122089  | -3.1515151 | -0.0157584 |

5b\_sy\_1\_r.log

E = -1224.132898

H = -1223.790876

G = -1223.862577

NImag=0

|   |            |            |            |
|---|------------|------------|------------|
| C | -0.5392808 | -0.6103719 | -0.9917698 |
| C | 0.2121388  | -0.0844077 | 0.2371488  |
| C | 1.2257493  | -1.0379913 | 0.8262775  |
| C | 2.2070384  | -1.6427155 | 0.0307470  |
| C | 3.1274456  | -2.5209587 | 0.5901151  |
| C | 3.0604815  | -2.8044487 | 1.9593958  |
| C | 2.0834423  | -2.2115717 | 2.7672492  |
| C | 1.1764376  | -1.3279135 | 2.1940790  |
| C | -1.4119831 | -1.7576120 | -0.5501479 |
| C | -0.9942939 | -3.1727512 | -0.8768465 |

|   |            |            |            |
|---|------------|------------|------------|
| O | -3.3386515 | -2.4485429 | 0.7115528  |
| C | -2.4842067 | -1.4328640 | 0.2647774  |
| O | -2.7956213 | -0.2805687 | 0.6777313  |
| S | 1.0681386  | 1.5616172  | -0.0103263 |
| C | 1.6894274  | 1.5194928  | -1.7018547 |
| C | -0.3272206 | 2.6898096  | -0.1820715 |
| C | 4.0059183  | -3.7198906 | 2.5416513  |
| N | 4.7674808  | -4.4560846 | 3.0099624  |
| C | -1.7706636 | -4.1595550 | -0.0087059 |
| C | -3.2185331 | -3.7069872 | 0.0609562  |
| H | -1.1336516 | 0.2097831  | -1.4139008 |
| H | 0.1699348  | -0.9354638 | -1.7620440 |
| H | -0.5366730 | 0.1833352  | 0.9923300  |
| H | 2.2513026  | -1.4448774 | -1.0362464 |
| H | 3.8873692  | -2.9904776 | -0.0255563 |
| H | 2.0372918  | -2.4441828 | 3.8259142  |
| H | 0.4131289  | -0.8638268 | 2.8123906  |
| H | -1.1621864 | -3.4190341 | -1.9398722 |
| H | 0.0855050  | -3.3086633 | -0.7114556 |
| H | 2.0874464  | 2.5147340  | -1.9093961 |
| H | 2.4966606  | 0.7873658  | -1.7515361 |
| H | 0.8830937  | 1.2736029  | -2.3933255 |
| H | 0.0839179  | 3.6754982  | -0.4079541 |
| H | -0.8466179 | 2.7145060  | 0.7771487  |
| H | -0.9897562 | 2.3545346  | -0.9805139 |
| H | -1.7163904 | -5.1791565 | -0.4053597 |
| H | -1.3618644 | -4.1719039 | 1.0102639  |
| H | -3.8374450 | -4.4028060 | 0.6347504  |
| H | -3.6348418 | -3.6339145 | -0.9564619 |

5b\_sy\_1\_ts1.log

E = -1224.100343

H = -1223.761279

G = -1223.831375

NImag=1

|   |            |            |            |
|---|------------|------------|------------|
| C | -0.7274766 | -0.9173315 | -0.5875287 |
| C | 0.3769225  | 0.4525949  | 0.7926637  |
| C | 1.7584806  | 0.1812342  | 0.5224158  |
| C | 2.5947933  | 1.0238504  | -0.2555968 |
| C | 3.8962861  | 0.6666365  | -0.5581478 |
| C | 4.4154396  | -0.5611117 | -0.1129197 |
| C | 3.6026674  | -1.4213465 | 0.6481674  |
| C | 2.3068949  | -1.0558721 | 0.9571327  |
| C | -2.0826014 | -1.0121056 | -0.3451793 |
| C | -2.5718151 | -1.7118580 | 0.9068502  |
| O | -4.3412621 | -0.5335577 | -1.0749456 |
| C | -3.0025747 | -0.3646675 | -1.2592068 |
| O | -2.6780951 | 0.3340973  | -2.2210064 |
| S | -0.1396465 | 2.1379883  | 0.7293882  |
| C | -0.7204737 | 2.4591930  | -0.9564371 |
| C | -1.7160397 | 2.0213784  | 1.5961943  |
| C | 5.7578559  | -0.9329346 | -0.4319149 |
| N | 6.8488614  | -1.2354589 | -0.6903983 |
| C | -4.0308249 | -1.3706764 | 1.1872962  |
| C | -4.8044196 | -1.4884511 | -0.1076797 |
| H | -0.3724418 | -0.4750538 | -1.5155790 |
| H | -0.0650963 | -1.6502003 | -0.1319551 |
| H | -0.0666961 | -0.0240129 | 1.6634041  |
| H | 2.2276660  | 1.9779485  | -0.6248900 |
| H | 4.5199997  | 1.3340393  | -1.1450947 |
| H | 4.0006482  | -2.3692809 | 0.9975658  |

|   |            |            |            |
|---|------------|------------|------------|
| H | 1.6934330  | -1.7211275 | 1.5590994  |
| H | -2.4673362 | -2.8016868 | 0.8102422  |
| H | -1.9415685 | -1.4134701 | 1.7557988  |
| H | -1.1103562 | 3.4799941  | -0.9618647 |
| H | 0.1458848  | 2.3960998  | -1.6179267 |
| H | -1.4808468 | 1.7324697  | -1.2496992 |
| H | -2.2256462 | 2.9802274  | 1.4885246  |
| H | -1.5021245 | 1.8235344  | 2.6476630  |
| H | -2.3014563 | 1.2128696  | 1.1529456  |
| H | -4.4614536 | -2.0434547 | 1.9349675  |
| H | -4.1242971 | -0.3442091 | 1.5638133  |
| H | -5.8669460 | -1.2726096 | 0.0187725  |
| H | -4.6997574 | -2.4962907 | -0.5308654 |

5b\_sy\_2.log

E = -1224.134619

H = -1223.792561

G = -1223.860940

NImag=0

|   |            |            |            |
|---|------------|------------|------------|
| C | 1.3304487  | -4.4860009 | -2.8220183 |
| C | 0.1058760  | -3.5512300 | -2.8767001 |
| C | -1.1077757 | -4.1151174 | -3.5873055 |
| C | -1.9113488 | -3.2641284 | -4.3552759 |
| C | -3.0259385 | -3.7528035 | -5.0241521 |
| C | -3.3410030 | -5.1131832 | -4.9195605 |
| C | -2.5491187 | -5.9765456 | -4.1547134 |
| C | -1.4344117 | -5.4728928 | -3.4931158 |
| C | 2.6319836  | -3.8182818 | -2.4968348 |
| C | 3.2902300  | -3.0116400 | -3.5918445 |
| O | 4.3538551  | -3.3161494 | -0.9015837 |
| C | 3.1623668  | -3.9743466 | -1.2321378 |
| O | 2.6820862  | -4.6474489 | -0.2710638 |
| S | -0.5317247 | -2.9769846 | -1.2276906 |
| C | -0.4744804 | -4.4402809 | -0.1773037 |
| C | 0.7588997  | -1.9576975 | -0.4785507 |
| C | -4.4920937 | -5.6307726 | -5.6108951 |
| N | -5.4185998 | -6.0468605 | -6.1672938 |
| C | 4.7286102  | -2.6689005 | -3.2139950 |
| C | 4.7499791  | -2.2501833 | -1.7557745 |
| H | 1.1350358  | -5.3133073 | -2.1319038 |
| H | 1.3677305  | -4.9235183 | -3.8327576 |
| H | 0.3782907  | -2.5987536 | -3.3468248 |
| H | -1.6572759 | -2.2102032 | -4.4325226 |
| H | -3.6458718 | -3.0942758 | -5.6233167 |
| H | -2.8040172 | -7.0287485 | -4.0839919 |
| H | -0.8184086 | -6.1472139 | -2.9062921 |
| H | 3.2743999  | -3.5716993 | -4.5398644 |
| H | 2.7449476  | -2.0726938 | -3.7973613 |
| H | -0.8696685 | -4.1294001 | 0.7926624  |
| H | -1.1330408 | -5.1948920 | -0.6123913 |
| H | 0.5659299  | -4.7754805 | -0.0992603 |
| H | 0.2796368  | -1.4460559 | 0.3592463  |
| H | 1.0818792  | -1.2267325 | -1.2218912 |
| H | 1.5772374  | -2.5937363 | -0.1391806 |
| H | 5.3751431  | -3.5472831 | -3.3341508 |
| H | 5.1323619  | -1.8656392 | -3.8397127 |
| H | 4.0741775  | -1.3929065 | -1.6046953 |
| H | 5.7513722  | -1.9577120 | -1.4270816 |

5b\_sy\_2\_r.log

```

E = -1224.132985
H = -1223.791114
G = -1223.862451
NImag=0
C -0.6020874 -0.5697018 -0.9463436
C 0.1542711 -0.0777297 0.2889512
C 1.1740190 -1.0396822 0.8564620
C 1.2895488 -1.1687517 2.2458801
C 2.2205534 -2.0342684 2.8057417
C 3.0537235 -2.7775858 1.9608110
C 2.9553604 -2.6564511 0.5700220
C 2.0155647 -1.7887824 0.0253914
C -1.4189127 -1.7732888 -0.5475850
C -1.0598296 -3.1295309 -1.1055576
O -3.2069498 -2.6343429 0.8106130
C -2.4575562 -1.5469448 0.3406433
O -2.8338204 -0.4298170 0.7931188
S 1.0307858 1.5611556 0.0733927
C 1.7704496 1.4589022 -1.5662581
C -0.3249598 2.7136152 -0.2187896
C 4.0228446 -3.6766615 2.5287785
N 4.8036440 -4.3996352 2.9860031
C -2.1714808 -4.1308756 -0.8013051
C -2.6275217 -3.9202013 0.6315925
H -1.2330483 0.2492314 -1.3156628
H 0.0970634 -0.8319907 -1.7480466
H -0.5865368 0.1761005 1.0571665
H 0.6358911 -0.5901110 2.8932596
H 2.3024202 -2.1397140 3.8824510
H 3.6065125 -3.2387326 -0.0735158
H 1.9386390 -1.7067515 -1.0545284
H -0.8976029 -3.0717887 -2.1927181
H -0.1120028 -3.5142068 -0.6870165
H 2.2570768 2.4185049 -1.7514564
H 2.5198441 0.6655182 -1.5485649
H 1.0010496 1.2640130 -2.3140064
H 0.1215243 3.6992809 -0.3636127
H -0.9503588 2.7170154 0.6758778
H -0.8959067 2.4154117 -1.0983381
H -3.0284436 -3.9660009 -1.4667385
H -1.8332275 -5.1637668 -0.9377230
H -1.7696216 -4.0319516 1.3144484
H -3.3955834 -4.6410629 0.9264324

```

```

5b_sy_2_r2.log
E = -1224.132990
H = -1223.790921
G = -1223.861002
NImag=0
C -0.6393358 -0.4448649 -0.5245128
C 0.7825178 -0.8203776 -0.9776691
C 0.9091394 -1.5964395 -2.2691328
C 2.0289881 -2.4117114 -2.4674511
C 2.1991128 -3.1049524 -3.6605262
C 1.2303625 -2.9784853 -4.6618662
C 0.0995749 -2.1732548 -4.4713596
C -0.0594210 -1.4840231 -3.2746330
C -1.5556059 -1.6352649 -0.4710489
C -1.2176996 -2.7388712 0.5038195
O -3.5756927 -2.7055570 -1.2027405
C -2.6561399 -1.6518055 -1.3128600

```

|   |            |            |            |
|---|------------|------------|------------|
| O | -2.9545208 | -0.8175722 | -2.2136216 |
| S | 1.9078289  | 0.6554015  | -1.1822162 |
| C | 1.1956250  | 1.5622402  | -2.5669402 |
| C | 1.4884109  | 1.7359514  | 0.1996746  |
| C | 1.3956093  | -3.6899699 | -5.9016445 |
| N | 1.5296068  | -4.2613413 | -6.9001903 |
| C | -2.1051349 | -3.9576072 | 0.2635483  |
| C | -3.5175195 | -3.4769506 | -0.0110526 |
| H | -0.5359972 | 0.0191649  | 0.4670877  |
| H | -1.0713249 | 0.3010516  | -1.1991353 |
| H | 1.3042165  | -1.3652774 | -0.1823258 |
| H | 2.7722004  | -2.5098591 | -1.6800487 |
| H | 3.0665150  | -3.7377128 | -3.8158900 |
| H | -0.6477772 | -2.0965460 | -5.2545640 |
| H | -0.9582467 | -0.8908927 | -3.1114173 |
| H | -0.1623540 | -3.0411254 | 0.4102483  |
| H | -1.3326779 | -2.4037792 | 1.5503632  |
| H | 1.6762440  | 2.5429883  | -2.5701782 |
| H | 1.4445760  | 1.0269697  | -3.4838887 |
| H | 0.1161979  | 1.6633821  | -2.4430710 |
| H | 2.1824190  | 2.5774395  | 0.1541739  |
| H | 1.6465199  | 1.1752259  | 1.1228686  |
| H | 0.4574060  | 2.0792021  | 0.1134838  |
| H | -1.7535874 | -4.5162058 | -0.6133729 |
| H | -2.0976262 | -4.6391086 | 1.1209989  |
| H | -3.8770455 | -2.8707383 | 0.8359031  |
| H | -4.2129284 | -4.3088675 | -0.1558004 |

5b\_sy\_2\_r3.log

E = -1224.133619

H = -1223.791666

G = -1223.861552

NImag=0

|   |            |            |            |
|---|------------|------------|------------|
| C | -0.5274419 | -0.5749990 | -1.9760998 |
| C | 0.7475061  | -0.7038780 | -1.1056783 |
| C | 1.5111127  | -1.9954173 | -1.2607235 |
| C | 2.0852959  | -2.5941441 | -0.1354088 |
| C | 2.8044340  | -3.7793296 | -0.2533940 |
| C | 2.9455435  | -4.3641052 | -1.5158788 |
| C | 2.3653023  | -3.7790370 | -2.6501128 |
| C | 1.6448652  | -2.5990532 | -2.5176470 |
| C | -1.3882802 | -1.8024459 | -1.9242079 |
| C | -1.9534278 | -2.2045281 | -0.5824669 |
| O | -2.3966575 | -3.6545905 | -3.0694488 |
| C | -1.5491636 | -2.5357779 | -3.0894964 |
| O | -1.0130151 | -2.3329808 | -4.2143483 |
| S | 1.9004692  | 0.6711412  | -1.5672236 |
| C | 0.9666895  | 2.1343533  | -1.0760690 |
| C | 3.1416950  | 0.6236533  | -0.2607044 |
| C | 3.6903851  | -5.5880465 | -1.6506376 |
| N | 4.2914336  | -6.5721794 | -1.7588394 |
| C | -2.5349013 | -3.6144505 | -0.6482398 |
| C | -3.2790639 | -3.7655751 | -1.9618705 |
| H | -1.0621959 | 0.3145582  | -1.6111714 |
| H | -0.2456758 | -0.3900934 | -3.0191279 |
| H | 0.5265058  | -0.5258892 | -0.0471962 |
| H | 1.9649333  | -2.1333356 | 0.8414803  |
| H | 3.2501137  | -4.2472344 | 0.6180490  |
| H | 2.4703307  | -4.2559701 | -3.6191361 |
| H | 1.1435380  | -2.1749880 | -3.3852146 |
| H | -1.1735347 | -2.1741199 | 0.1965471  |

|   |            |            |            |
|---|------------|------------|------------|
| H | -2.7338491 | -1.5018091 | -0.2398178 |
| H | 1.6689468  | 2.9701857  | -1.0713679 |
| H | 0.1904789  | 2.3096784  | -1.8207844 |
| H | 0.5400362  | 1.9776096  | -0.0831822 |
| H | 3.7444094  | 1.5286014  | -0.3618582 |
| H | 3.7679512  | -0.2549643 | -0.4211353 |
| H | 2.6476729  | 0.5899995  | 0.7124108  |
| H | -1.7283447 | -4.3587459 | -0.6203008 |
| H | -3.2075250 | -3.8161190 | 0.1923929  |
| H | -4.0619072 | -2.9937978 | -2.0377115 |
| H | -3.7555508 | -4.7461424 | -2.0527551 |

5b\_sy\_2\_r4.log

E = -1224.134822  
H = -1223.792714  
G = -1223.862744

NImag=0

|   |            |            |            |
|---|------------|------------|------------|
| C | 0.5147581  | -1.4477845 | -2.6462412 |
| C | 0.7718773  | -0.7653852 | -1.2824183 |
| C | 1.2437448  | -1.6528670 | -0.1632514 |
| C | 0.8920787  | -1.3432753 | 1.1554340  |
| C | 1.3266025  | -2.1369057 | 2.2119320  |
| C | 2.1178154  | -3.2570369 | 1.9373393  |
| C | 2.4619988  | -3.5896276 | 0.6199994  |
| C | 2.0199966  | -2.7900412 | -0.4266309 |
| C | -0.3826000 | -2.6438250 | -2.5380126 |
| C | -1.7866524 | -2.4275030 | -2.0253008 |
| O | -0.7057881 | -5.0007656 | -2.8560816 |
| C | 0.1407286  | -3.8824790 | -2.8760117 |
| O | 1.3281202  | -4.1576583 | -3.2061262 |
| S | 1.9603976  | 0.6282842  | -1.6135671 |
| C | 2.1194732  | 1.4913890  | -0.0415599 |
| C | 3.5685982  | -0.1734036 | -1.7277728 |
| C | 2.5749050  | -4.0865174 | 3.0208159  |
| N | 2.9448236  | -4.7532612 | 3.8926572  |
| C | -2.4602410 | -3.7648146 | -1.7269259 |
| C | -2.1022705 | -4.7403480 | -2.8322945 |
| H | 0.0906877  | -0.6666742 | -3.2981723 |
| H | 1.4637957  | -1.7678811 | -3.0892681 |
| H | -0.1188696 | -0.2112140 | -0.9631996 |
| H | 0.2662905  | -0.4778245 | 1.3572377  |
| H | 1.0544574  | -1.8974993 | 3.2344779  |
| H | 3.0606976  | -4.4731841 | 0.4237401  |
| H | 2.2424135  | -3.0781366 | -1.4526319 |
| H | -1.7812096 | -1.8169856 | -1.1075996 |
| H | -2.4012296 | -1.8612089 | -2.7477743 |
| H | 2.8256813  | 2.3087061  | -0.2023368 |
| H | 1.1390742  | 1.8941832  | 0.2188635  |
| H | 2.4879258  | 0.8102069  | 0.7270883  |
| H | 4.2977237  | 0.6197152  | -1.9059455 |
| H | 3.5506128  | -0.8537761 | -2.5806761 |
| H | 3.7906361  | -0.7022474 | -0.7995389 |
| H | -2.0930360 | -4.1709603 | -0.7756212 |
| H | -3.5481127 | -3.6625337 | -1.6508003 |
| H | -2.4158135 | -4.3321570 | -3.8065296 |
| H | -2.5877964 | -5.7110559 | -2.6958112 |

5b\_sy\_2\_ts1.log

E = -1224.101024  
H = -1223.762213

```

G = -1223.833044
NImag=1
C -0.7186900 -0.8302325 -0.7102648
C 0.3615188 0.4234217 0.7802925
C 1.7462909 0.1634578 0.5147957
C 2.2905237 -1.0917492 0.8987929
C 3.5903557 -1.4416914 0.5888098
C 4.4104015 -0.5473730 -0.1236596
C 3.8936929 0.6972537 -0.5222881
C 2.5881626 1.0391817 -0.2190576
C -2.0608534 -0.9932795 -0.4374033
C -2.4903377 -1.8559914 0.7270804
O -4.3537941 -0.3757135 -0.9244974
C -3.0312744 -0.2670020 -1.2337649
O -2.7665444 0.4203447 -2.2211510
S -0.1443242 2.1116751 0.7980675
C -0.7631995 2.5168733 -0.8575497
C -1.6983236 1.9848617 1.7015965
C 5.7569051 -0.9033224 -0.4437876
N 6.8512386 -1.1928347 -0.7030405
C -3.9639967 -2.2265879 0.6160247
C -4.7457212 -0.9633136 0.3266291
H -0.4073015 -0.2654792 -1.5857137
H -0.0224511 -1.5933552 -0.3689493
H -0.1020658 -0.1059150 1.6090482
H 1.6699963 -1.7844008 1.4613977
H 3.9857736 -2.4040329 0.8996371
H 4.5219788 1.3893146 -1.0747617
H 2.2208149 2.0057491 -0.5548159
H -1.8595314 -2.7514311 0.7767829
H -2.3345267 -1.3133369 1.6748392
H -1.1207342 3.5483048 -0.8099628
H 0.0833156 2.4546611 -1.5445142
H -1.5549080 1.8290867 -1.1592255
H -2.1939375 2.9553865 1.6454011
H -1.4595493 1.7424487 2.7382034
H -2.3110239 1.2044525 1.2456445
H -4.1234725 -2.9443161 -0.1977275
H -4.3342721 -2.6772482 1.5418941
H -4.5920272 -0.2247385 1.1246907
H -5.8170195 -1.1491937 0.2290361

```

```

5b_sy_3.log
E = -1224.139800
H = -1223.797640
G = -1223.866229
NImag=0
C 1.5445365 -4.4692742 -3.0729513
C 0.2866391 -3.5763834 -2.9829647
C -0.9738110 -4.1387999 -3.5861952
C -1.3256378 -5.4861124 -3.4268433
C -2.4805452 -5.9888781 -4.0145849
C -3.2911547 -5.1377245 -4.7746407
C -2.9514588 -3.7913080 -4.9495545
C -1.7952385 -3.3031484 -4.3537114
C 2.8026086 -3.7992279 -2.6091823
C 3.5583971 -2.9326717 -3.5890107
O 4.3377941 -3.3832134 -0.8095702
C 3.1460800 -3.9446749 -1.2778877
O 2.4740000 -4.5419687 -0.3865074
S 0.0746903 -3.0642338 -1.2097135

```



|   |            |            |            |
|---|------------|------------|------------|
| C | -1.4292741 | -2.0704700 | -1.2842233 |
| C | -0.5554194 | -4.5279164 | -0.3745926 |
| C | -4.4854660 | -5.6548910 | -5.3885464 |
| N | -5.4469410 | -6.0708667 | -5.8822313 |
| C | 4.5990018  | -2.0926451 | -2.8521804 |
| C | 5.2661072  | -2.9639520 | -1.8021445 |
| H | 1.3676747  | -5.3946943 | -2.5127720 |
| H | 1.6132678  | -4.7444060 | -4.1355826 |
| H | 0.5088672  | -2.6086902 | -3.4488248 |
| H | -0.6982237 | -6.1540661 | -2.8449642 |
| H | -2.7527876 | -7.0318637 | -3.8912914 |
| H | -3.5846244 | -3.1420075 | -5.5449102 |
| H | -1.5223834 | -2.2599122 | -4.4877243 |
| H | 4.0625398  | -3.5358191 | -4.3641316 |
| H | 2.8696989  | -2.2696164 | -4.1361903 |
| H | -1.6373475 | -1.7376183 | -0.2652051 |
| H | -1.2294324 | -1.2039168 | -1.9176297 |
| H | -2.2645895 | -2.6559919 | -1.6717634 |
| H | -0.7085978 | -4.2389623 | 0.6677303  |
| H | 0.2310564  | -5.2800806 | -0.4338734 |
| H | -1.4963262 | -4.8501453 | -0.8234732 |
| H | 5.3528650  | -1.6884210 | -3.5363026 |
| H | 4.1171872  | -1.2470578 | -2.3447687 |
| H | 6.0563010  | -2.4285393 | -1.2680712 |
| H | 5.7122460  | -3.8496306 | -2.2817157 |

5b\_sy\_3\_r.log

E = -1224.134609

H = -1223.792660

G = -1223.863511

NImag=0

|   |            |            |            |
|---|------------|------------|------------|
| C | -0.5386619 | -1.1952299 | -0.9379122 |
| C | 0.0910014  | -0.4894751 | 0.2723645  |
| C | 1.0065399  | -1.3214532 | 1.1300921  |
| C | 1.9518272  | -2.1934907 | 0.5737315  |
| C | 2.7824728  | -2.9504992 | 1.3914469  |
| C | 2.6656294  | -2.8377665 | 2.7817977  |
| C | 1.7252701  | -1.9739300 | 3.3548108  |
| C | 0.9051308  | -1.2210898 | 2.5234303  |
| C | -1.4736579 | -2.2701771 | -0.4505395 |
| C | -1.0865692 | -3.7204387 | -0.6210144 |
| O | -3.5383900 | -2.7903429 | 0.6669117  |
| C | -2.6137544 | -1.8423463 | 0.2102035  |
| O | -2.9334179 | -0.6482171 | 0.4695645  |
| S | 0.8985178  | 1.0916232  | -0.3072033 |
| C | 1.7267330  | 1.7389657  | 1.1551267  |
| C | 2.3087252  | 0.5611694  | -1.2930428 |
| C | 3.5197593  | -3.6239973 | 3.6318280  |
| N | 4.2078733  | -4.2564069 | 4.3157676  |
| C | -1.9769635 | -4.6049568 | 0.2478845  |
| C | -3.4067010 | -4.1050311 | 0.1420102  |
| H | -1.0650823 | -0.4303594 | -1.5278243 |
| H | 0.2393633  | -1.6227690 | -1.5816200 |
| H | -0.7351254 | -0.0915849 | 0.8736023  |
| H | 2.0398906  | -2.2963482 | -0.5034473 |
| H | 3.5125430  | -3.6276128 | 0.9608100  |
| H | 1.6394546  | -1.8998059 | 4.4337067  |
| H | 0.1682703  | -0.5518573 | 2.9592984  |
| H | -1.1685533 | -4.0496074 | -1.6718095 |
| H | -0.0325752 | -3.8789064 | -0.3460691 |
| H | 2.2263818  | 2.6624612  | 0.8551561  |

|   |            |            |            |
|---|------------|------------|------------|
| H | 0.9611492  | 1.9574014  | 1.9020798  |
| H | 2.4498364  | 1.0120747  | 1.5293201  |
| H | 2.8128289  | 1.4689747  | -1.6309391 |
| H | 1.9309203  | 0.0077556  | -2.1544249 |
| H | 2.9833486  | -0.0489978 | -0.6902057 |
| H | -1.9251178 | -5.6559581 | -0.0564091 |
| H | -1.6643022 | -4.5424707 | 1.2984431  |
| H | -4.1009356 | -4.7282499 | 0.7131353  |
| H | -3.7261038 | -4.1110018 | -0.9123894 |

5b\_sy\_4.log

E = -1224.136769  
H = -1223.794690  
G = -1223.864097

NImag=0

|   |            |            |            |
|---|------------|------------|------------|
| C | 1.4566243  | -4.3279423 | -3.1779368 |
| C | 0.1407472  | -3.5994395 | -2.8264180 |
| C | -1.0626587 | -4.1969285 | -3.5131936 |
| C | -1.3950724 | -5.5463537 | -3.3343539 |
| C | -2.4896167 | -6.0943296 | -3.9907694 |
| C | -3.2538300 | -5.2860669 | -4.8418570 |
| C | -2.9298752 | -3.9384424 | -5.0340221 |
| C | -1.8372574 | -3.4011287 | -4.3627812 |
| C | 2.7125006  | -3.6889861 | -2.6706426 |
| C | 3.3154764  | -2.5609811 | -3.4741859 |
| O | 4.3757188  | -3.5628270 | -0.9453553 |
| C | 3.1759885  | -4.0903545 | -1.4341814 |
| O | 2.6014444  | -4.8807269 | -0.6291427 |
| S | -0.1838934 | -3.6494685 | -0.9946784 |
| C | 0.8314619  | -2.3195180 | -0.3095313 |
| C | -1.7853944 | -2.8090412 | -0.9427325 |
| C | -4.3879085 | -5.8483280 | -5.5258231 |
| N | -5.3011298 | -6.3003148 | -6.0762647 |
| C | 4.3668221  | -1.8293407 | -2.6433155 |
| C | 5.1823857  | -2.8604437 | -1.8828994 |
| H | 1.3757520  | -5.3643545 | -2.8305934 |
| H | 1.4580342  | -4.3563316 | -4.2782048 |
| H | 0.2128629  | -2.5304662 | -3.0563138 |
| H | -0.8035150 | -6.1772891 | -2.6763311 |
| H | -2.7525681 | -7.1375095 | -3.8507625 |
| H | -3.5304274 | -3.3230588 | -5.6957193 |
| H | -1.5828242 | -2.3541064 | -4.4998701 |
| H | 3.7758841  | -2.9220038 | -4.4103099 |
| H | 2.5344455  | -1.8494616 | -3.7873973 |
| H | 0.3250844  | -1.9983410 | 0.6037266  |
| H | 1.8071051  | -2.7383696 | -0.0750946 |
| H | 0.8893543  | -1.4971114 | -1.0255400 |
| H | -1.9985686 | -2.5987653 | 0.1071202  |
| H | -2.5439593 | -3.4829096 | -1.3420696 |
| H | -1.7388725 | -1.8827769 | -1.5200926 |
| H | 5.0245536  | -1.2154880 | -3.2679004 |
| H | 3.8820221  | -1.1681632 | -1.9129780 |
| H | 5.9869399  | -2.4002186 | -1.3023473 |
| H | 5.6312631  | -3.5771130 | -2.5885371 |

5b\_sy\_5.log

E = -1224.139418  
H = -1223.797554  
G = -1223.866171

NImag=0

|   |            |            |            |
|---|------------|------------|------------|
| C | 0.9766961  | -2.1395009 | -2.3593923 |
| C | -0.3902114 | -2.7094323 | -1.8944465 |
| C | -1.0098405 | -3.6369770 | -2.9100463 |
| C | -1.9512841 | -3.1052024 | -3.7977464 |
| C | -2.4799137 | -3.8818936 | -4.8216848 |
| C | -2.0679660 | -5.2133749 | -4.9508669 |
| C | -1.1388448 | -5.7647492 | -4.0601242 |
| C | -0.6146828 | -4.9746666 | -3.0444008 |
| C | 2.0167402  | -3.1429003 | -2.7554545 |
| C | 2.1679568  | -3.5047742 | -4.2152236 |
| O | 3.7692441  | -4.6272234 | -2.0458239 |
| C | 2.7559748  | -3.7156905 | -1.7395736 |
| O | 2.6108111  | -3.5077857 | -0.4972270 |
| S | -0.2372390 | -3.5989923 | -0.2847225 |
| C | 0.2136082  | -2.2641290 | 0.8354167  |
| C | -1.9917346 | -3.7584676 | 0.1191801  |
| C | -2.6107174 | -6.0260015 | -6.0066760 |
| N | -3.0476621 | -6.6794256 | -6.8573750 |
| C | 3.0055123  | -4.7726961 | -4.3525258 |
| C | 4.1882047  | -4.6739464 | -3.4044713 |
| H | 0.7160274  | -1.4996877 | -3.2145289 |
| H | 1.3335394  | -1.4686745 | -1.5669847 |
| H | -1.0799987 | -1.8845053 | -1.6780975 |
| H | -2.2641632 | -2.0701432 | -3.6919889 |
| H | -3.2055917 | -3.4667630 | -5.5132096 |
| H | -0.8296413 | -6.7991961 | -4.1685517 |
| H | 0.1191265  | -5.4040592 | -2.3686612 |
| H | 1.1843101  | -3.6572842 | -4.6853094 |
| H | 2.6461711  | -2.6933765 | -4.7915833 |
| H | 0.0343419  | -2.6298387 | 1.8485754  |
| H | 1.2750555  | -2.0803293 | 0.6761049  |
| H | -0.4043048 | -1.3876868 | 0.6277571  |
| H | -2.0557466 | -4.1238729 | 1.1459889  |
| H | -2.4285613 | -4.4946019 | -0.5578280 |
| H | -2.4905321 | -2.7921142 | 0.0196677  |
| H | 2.4098683  | -5.6537703 | -4.0779992 |
| H | 3.3629927  | -4.9151003 | -5.3781248 |
| H | 4.7743927  | -3.7703921 | -3.6352663 |
| H | 4.8502621  | -5.5408745 | -3.4847758 |

5b\_sy\_5\_r.log

E = -1224.133617

H = -1223.791672

G = -1223.861610

NImag=0

|   |            |            |            |
|---|------------|------------|------------|
| C | -1.2585731 | -0.0126480 | 1.2927308  |
| C | -0.5805679 | 1.2230718  | 0.6503426  |
| C | -0.5296028 | 2.4584939  | 1.5143740  |
| C | -0.7253098 | 3.7140385  | 0.9312901  |
| C | -0.6713417 | 4.8698136  | 1.7039368  |
| C | -0.4178707 | 4.7579286  | 3.0746914  |
| C | -0.2313223 | 3.5039153  | 3.6730541  |
| C | -0.2936490 | 2.3574735  | 2.8914333  |
| C | -2.5618215 | 0.3220509  | 1.9555788  |
| C | -3.6648283 | 0.8815605  | 1.0886558  |
| O | -3.8800568 | 0.4284300  | 3.9580120  |
| C | -2.6506429 | 0.1728096  | 3.3307893  |
| O | -1.7395335 | -0.1710331 | 4.1343556  |
| S | 1.1686917  | 0.7686648  | 0.2412644  |
| C | 0.9495508  | -0.5272225 | -0.9943591 |
| C | 1.7125203  | 2.1300877  | -0.8078187 |

|   |            |            |            |
|---|------------|------------|------------|
| C | -0.3555635 | 5.9468191  | 3.8832217  |
| N | -0.3037564 | 6.9040613  | 4.5332023  |
| C | -4.7892278 | 1.4464949  | 1.9529068  |
| C | -5.0218917 | 0.5003984  | 3.1161194  |
| H | -1.3883388 | -0.7480397 | 0.4848238  |
| H | -0.5899832 | -0.4536988 | 2.0410530  |
| H | -1.0297861 | 1.4641348  | -0.3197178 |
| H | -0.9267764 | 3.7887226  | -0.1340660 |
| H | -0.8237993 | 5.8454344  | 1.2545884  |
| H | -0.0527540 | 3.4347362  | 4.7411426  |
| H | -0.2080086 | 1.3804611  | 3.3626895  |
| H | -3.2807549 | 1.6802195  | 0.4324180  |
| H | -4.0763286 | 0.1170872  | 0.4056425  |
| H | 1.9183684  | -0.6692887 | -1.4772047 |
| H | 0.6559200  | -1.4424561 | -0.4805472 |
| H | 0.1945297  | -0.2154583 | -1.7190774 |
| H | 2.6696238  | 1.8339720  | -1.2423217 |
| H | 1.8511902  | 3.0086279  | -0.1762068 |
| H | 0.9692673  | 2.3111934  | -1.5868700 |
| H | -4.5014304 | 2.4261349  | 2.3563470  |
| H | -5.7144718 | 1.5771211  | 1.3814120  |
| H | -5.2614695 | -0.5057940 | 2.7361001  |
| H | -5.8469369 | 0.8303648  | 3.7542572  |

5b\_sy\_5\_ts1.log

E = -1224.109021

H = -1223.769822

G = -1223.838310

NImag=1

|   |            |            |            |
|---|------------|------------|------------|
| C | 1.2289189  | 0.8010506  | 1.6074920  |
| C | 1.3570608  | -1.2350035 | 0.7219764  |
| C | -0.0134468 | -1.3947834 | 0.3243955  |
| C | -0.9190890 | -2.0508580 | 1.1987258  |
| C | -2.2755767 | -2.0727496 | 0.9467903  |
| C | -2.7854098 | -1.4417532 | -0.2061283 |
| C | -1.9072661 | -0.8058087 | -1.0967312 |
| C | -0.5482522 | -0.7711567 | -0.8305777 |
| C | 0.3794152  | 1.6348441  | 0.9091818  |
| C | -1.0798640 | 1.8036042  | 1.2951127  |
| O | 0.1973654  | 3.1814770  | -0.9441913 |
| C | 0.9146302  | 2.2218051  | -0.2987713 |
| O | 1.9881819  | 1.8972899  | -0.8138241 |
| S | 2.5307064  | -1.2030255 | -0.5806356 |
| C | 3.9934926  | -0.3955737 | 0.0972414  |
| C | 3.1628493  | -2.9027165 | -0.6464862 |
| C | -4.1902675 | -1.4604329 | -0.4746183 |
| N | -5.3310587 | -1.4753196 | -0.6902394 |
| C | -1.8422553 | 2.5808752  | 0.2246998  |
| C | -0.9624965 | 3.7063641  | -0.2799019 |
| H | 0.8880687  | 0.3809339  | 2.5523018  |
| H | 2.3013590  | 0.9217878  | 1.5117725  |
| H | 1.7104562  | -1.8276806 | 1.5657952  |
| H | -0.5310955 | -2.5360847 | 2.0902983  |
| H | -2.9535380 | -2.5756903 | 1.6297639  |
| H | -2.3008819 | -0.3224870 | -1.9861105 |
| H | 0.1096522  | -0.2479497 | -1.5189397 |
| H | -1.5450987 | 0.8219749  | 1.4531387  |
| H | -1.1575443 | 2.3454387  | 2.2480949  |
| H | 4.8334948  | -0.6698013 | -0.5441795 |
| H | 3.8204851  | 0.6787573  | 0.0522560  |
| H | 4.1623845  | -0.7440174 | 1.1185535  |

|   |            |            |            |
|---|------------|------------|------------|
| H | 3.9678181  | -2.9444108 | -1.3839261 |
| H | 2.3352355  | -3.5421457 | -0.9579184 |
| H | 3.5244300  | -3.1924061 | 0.3425483  |
| H | -2.0953416 | 1.9327391  | -0.6228531 |
| H | -2.7753171 | 2.9917956  | 0.6223002  |
| H | -0.6365624 | 4.3496093  | 0.5485613  |
| H | -1.4638139 | 4.3255341  | -1.0259976 |

5b\_sy\_5\_ts1\_rot1.log

E = -1224.105940  
H = -1223.766663  
G = -1223.836293

NImag=1

|   |            |            |            |
|---|------------|------------|------------|
| C | 0.9603812  | 1.7997049  | -0.6568958 |
| C | 1.7230905  | 0.0691485  | 0.3835540  |
| C | 0.6647725  | -0.9081398 | 0.3228656  |
| C | -0.4774775 | -0.6718885 | 1.1264597  |
| C | -1.5950091 | -1.4874105 | 1.0518403  |
| C | -1.6077272 | -2.5764772 | 0.1685989  |
| C | -0.4767265 | -2.8429867 | -0.6271217 |
| C | 0.6317669  | -2.0225926 | -0.5526060 |
| C | -0.3473196 | 2.0567544  | -0.2798124 |
| C | -0.6392867 | 2.7876740  | 1.0158699  |
| O | -2.6998410 | 1.8405594  | -0.8125224 |
| C | -1.4024369 | 1.5174693  | -1.1093148 |
| O | -1.2424738 | 0.8028851  | -2.0980035 |
| S | 3.2580406  | -0.3949963 | -0.3238458 |
| C | 4.1722536  | 1.1566139  | -0.3994705 |
| C | 4.1975164  | -1.2327040 | 0.9812904  |
| C | -2.7566515 | -3.4256053 | 0.0899186  |
| N | -3.6881965 | -4.1153470 | 0.0254556  |
| C | -2.1061946 | 2.6415082  | 1.4066603  |
| C | -2.9523047 | 2.8537247  | 0.1688423  |
| H | 1.7467963  | 2.4144389  | -0.2256136 |
| H | 1.1467032  | 1.4204233  | -1.6584501 |
| H | 1.8642904  | 0.5685581  | 1.3422631  |
| H | -0.4643282 | 0.1539267  | 1.8310553  |
| H | -2.4613470 | -1.2879673 | 1.6760409  |
| H | -0.4809000 | -3.6945593 | -1.3005329 |
| H | 1.4837239  | -2.2517603 | -1.1864424 |
| H | 0.0085797  | 2.3994817  | 1.8145550  |
| H | -0.4018832 | 3.8573477  | 0.9220824  |
| H | 5.2161168  | 0.9022770  | -0.5923492 |
| H | 3.7785364  | 1.7482099  | -1.2259181 |
| H | 4.0724701  | 1.6850344  | 0.5509686  |
| H | 5.1997158  | -1.4440065 | 0.6012847  |
| H | 3.6755791  | -2.1648559 | 1.2049160  |
| H | 4.2357855  | -0.5875430 | 1.8614341  |
| H | -2.3071844 | 1.6377576  | 1.8014721  |
| H | -2.3891916 | 3.3681543  | 2.1746211  |
| H | -2.7450105 | 3.8374700  | -0.2748203 |
| H | -4.0216437 | 2.7886771  | 0.3806866  |

5b\_sy\_5\_ts1\_rot2.log

E = -1224.102673  
H = -1223.763734  
G = -1223.835418

NImag=1

|   |            |            |            |
|---|------------|------------|------------|
| C | -0.7480760 | -0.9997103 | -0.2440262 |
| C | 0.3180075  | 0.6731396  | 0.6653100  |

|   |            |            |            |
|---|------------|------------|------------|
| C | 1.6699527  | 0.2887456  | 0.3587009  |
| C | 2.3211610  | -0.6261310 | 1.2255776  |
| C | 3.5757009  | -1.1286844 | 0.9358532  |
| C | 4.2357496  | -0.7354092 | -0.2420454 |
| C | 3.6083979  | 0.1623931  | -1.1212383 |
| C | 2.3507625  | 0.6603283  | -0.8278911 |
| C | -2.1253282 | -0.9437148 | -0.3639768 |
| C | -2.7782596 | -0.3688301 | -1.6090180 |
| O | -4.2591433 | -1.4688140 | 0.6511121  |
| C | -2.9042317 | -1.3544902 | 0.7844275  |
| O | -2.4462376 | -1.6110477 | 1.8973444  |
| S | -0.3042333 | 2.1173800  | -0.1097289 |
| C | -1.9122787 | 2.2717428  | 0.6861866  |
| C | 0.5403056  | 3.5378335  | 0.6425240  |
| C | 5.5371373  | -1.2460892 | -0.5433559 |
| N | 6.5933423  | -1.6612296 | -0.7880419 |
| C | -4.2725971 | -0.1523757 | -1.3896666 |
| C | -4.8287861 | -1.3579780 | -0.6606265 |
| H | -0.1477815 | -0.8943416 | -1.1476582 |
| H | -0.3131659 | -1.6161747 | 0.5380721  |
| H | 0.0072567  | 0.6111217  | 1.7070862  |
| H | 1.8200720  | -0.9316557 | 2.1402273  |
| H | 4.0566419  | -1.8239487 | 1.6171585  |
| H | 4.1140111  | 0.4656124  | -2.0330257 |
| H | 1.8937658  | 1.3503869  | -1.5326960 |
| H | -2.2969912 | 0.5790018  | -1.8884259 |
| H | -2.6366062 | -1.0453156 | -2.4635402 |
| H | -2.3900015 | 3.1711852  | 0.2952583  |
| H | -2.4976536 | 1.3883604  | 0.4320380  |
| H | -1.7666178 | 2.3421468  | 1.7661874  |
| H | 0.0573603  | 4.4486901  | 0.2803257  |
| H | 1.5813291  | 3.5112355  | 0.3152003  |
| H | 0.4705227  | 3.4561046  | 1.7289414  |
| H | -4.4532962 | 0.7405013  | -0.7776699 |
| H | -4.7986719 | -0.0187797 | -2.3396748 |
| H | -4.6185404 | -2.2798246 | -1.2196130 |
| H | -5.9062362 | -1.2867795 | -0.4999870 |

5b\_sy\_6.log

E = -1224.139000

H = -1223.796894

G = -1223.865618

NImag=0

|   |            |            |            |
|---|------------|------------|------------|
| C | 1.5362359  | -4.4456279 | -3.1146978 |
| C | 0.2757385  | -3.5616337 | -2.9737353 |
| C | -0.9917442 | -4.1099625 | -3.5748446 |
| C | -1.3330286 | -5.4646162 | -3.4609466 |
| C | -2.4957853 | -5.9514521 | -4.0467102 |
| C | -3.3255583 | -5.0766307 | -4.7577050 |
| C | -2.9969612 | -3.7222756 | -4.8862422 |
| C | -1.8323032 | -3.2504186 | -4.2937891 |
| C | 2.8040993  | -3.7945726 | -2.6479644 |
| C | 3.6287147  | -3.0073770 | -3.6400025 |
| O | 4.3120373  | -3.3695267 | -0.8239277 |
| C | 3.1541799  | -3.9767824 | -1.3222145 |
| O | 2.5235199  | -4.6600708 | -0.4633773 |
| S | 0.0886236  | -3.1183040 | -1.1795310 |
| C | -1.4202575 | -2.1301320 | -1.1828973 |
| C | -0.5138375 | -4.6185196 | -0.3897824 |
| C | -4.5285134 | -5.5770485 | -5.3686562 |
| N | -5.4970305 | -5.9793184 | -5.8599216 |

|   |            |            |            |
|---|------------|------------|------------|
| C | 5.0142441  | -2.7262733 | -3.0628331 |
| C | 4.8585274  | -2.3171384 | -1.6092271 |
| H | 1.3670747  | -5.3904743 | -2.5842315 |
| H | 1.5899498  | -4.6823837 | -4.1866737 |
| H | 0.4843702  | -2.5761302 | -3.4068549 |
| H | -0.6917850 | -6.1512952 | -2.9172705 |
| H | -2.7596371 | -7.0001526 | -3.9592301 |
| H | -3.6449251 | -3.0543966 | -5.4439955 |
| H | -1.5675505 | -2.2011695 | -4.3925053 |
| H | 3.7258263  | -3.5631564 | -4.5851145 |
| H | 3.1549638  | -2.0474068 | -3.9110541 |
| H | -1.6092901 | -1.8438593 | -0.1460242 |
| H | -1.2357398 | -1.2358619 | -1.7814676 |
| H | -2.2601992 | -2.7031156 | -1.5791266 |
| H | -0.6521017 | -4.3698395 | 0.6649819  |
| H | 0.2793743  | -5.3594935 | -0.4906016 |
| H | -1.4588880 | -4.9328009 | -0.8357348 |
| H | 5.6342651  | -3.6307881 | -3.1048117 |
| H | 5.5328515  | -1.9371631 | -3.6180745 |
| H | 4.2037873  | -1.4337024 | -1.5391434 |
| H | 5.8193525  | -2.0671296 | -1.1501612 |

5b\_sy\_6\_r.log

E = -1224.134755

H = -1223.792959

G = -1223.863392

NImag=0

|   |            |            |            |
|---|------------|------------|------------|
| C | -0.8538732 | -0.8720973 | -0.7978587 |
| C | -0.0300695 | -0.1864424 | 0.3007905  |
| C | 0.9555915  | -1.0574539 | 1.0323480  |
| C | 1.7282778  | -2.0153818 | 0.3626798  |
| C | 2.6332300  | -2.8064347 | 1.0599775  |
| C | 2.7656866  | -2.6411091 | 2.4439036  |
| C | 1.9984984  | -1.6922755 | 3.1296182  |
| C | 1.1004094  | -0.9069310 | 2.4172711  |
| C | -1.6950704 | -1.9570920 | -0.1792401 |
| C | -1.4144068 | -3.3993783 | -0.5267230 |
| O | -3.4515401 | -2.5116641 | 1.3667137  |
| C | -2.6830189 | -1.5467399 | 0.7006782  |
| O | -2.9956862 | -0.3565763 | 0.9830671  |
| S | 0.7704685  | 1.3397982  | -0.4170925 |
| C | 1.7431100  | 2.0168951  | 0.9391408  |
| C | 2.0720299  | 0.7117260  | -1.4911711 |
| C | 3.7008937  | -3.4589648 | 3.1695053  |
| N | 4.4549507  | -4.1164863 | 3.7529366  |
| C | -2.5484574 | -4.2892976 | -0.0240808 |
| C | -2.9304426 | -3.8344909 | 1.3732800  |
| H | -1.4656943 | -0.0957326 | -1.2809389 |
| H | -0.1956445 | -1.2916606 | -1.5678882 |
| H | -0.7402282 | 0.2581137  | 1.0084896  |
| H | 1.6234855  | -2.1543901 | -0.7089956 |
| H | 3.2308475  | -3.5490849 | 0.5419298  |
| H | 2.1047669  | -1.5783111 | 4.2032006  |
| H | 0.4954250  | -0.1725362 | 2.9422969  |
| H | -1.2987925 | -3.5214335 | -1.6146019 |
| H | -0.4639003 | -3.7552276 | -0.0887822 |
| H | 2.2506040  | 2.9042465  | 0.5551651  |
| H | 1.0524744  | 2.3000106  | 1.7357118  |
| H | 2.4672194  | 1.2778211  | 1.2863429  |
| H | 2.5673241  | 1.5827085  | -1.9250742 |
| H | 1.6046568  | 0.1224475  | -2.2819718 |

|   |            |            |            |
|---|------------|------------|------------|
| H | 2.7807205  | 0.1153673  | -0.9141664 |
| H | -3.4277961 | -4.1928748 | -0.6735412 |
| H | -2.2566313 | -5.3449851 | -0.0067827 |
| H | -2.0471823 | -3.8751699 | 2.0312755  |
| H | -3.7112382 | -4.4642524 | 1.8094688  |

5b\_sy\_6\_ts1.log

E = -1224.101417

H = -1223.761809

G = -1223.832618

NImag=1

|   |            |            |            |
|---|------------|------------|------------|
| C | -0.8478608 | -1.2151361 | -0.2732899 |
| C | 0.2713242  | 0.2599493  | 0.8938559  |
| C | 1.6510042  | 0.0588847  | 0.5405117  |
| C | 2.3470206  | 0.7595525  | -0.4750460 |
| C | 3.6482732  | 0.4302858  | -0.8153424 |
| C | 4.3060264  | -0.6251105 | -0.1642960 |
| C | 3.6328231  | -1.3473599 | 0.8369070  |
| C | 2.3377018  | -1.0082577 | 1.1785184  |
| C | -2.2209401 | -1.1047263 | -0.1518188 |
| C | -2.9025992 | -1.5543948 | 1.1220455  |
| O | -4.2969919 | -0.2579253 | -1.0681818 |
| C | -2.9585734 | -0.4710682 | -1.2253914 |
| O | -2.4892676 | -0.1425596 | -2.3165833 |
| S | -0.6188764 | 1.7409557  | 0.6789521  |
| C | 0.3799958  | 3.1279630  | 1.2809748  |
| C | -0.7087344 | 2.1571436  | -1.0833510 |
| C | 5.6497367  | -0.9634741 | -0.5180173 |
| N | 6.7406059  | -1.2384676 | -0.8045356 |
| C | -4.4104744 | -1.6529256 | 0.9254687  |
| C | -4.8779415 | -0.3878200 | 0.2381105  |
| H | -0.3726742 | -0.9699614 | -1.2203685 |
| H | -0.3222700 | -1.9496967 | 0.3335648  |
| H | -0.0436177 | -0.1607397 | 1.8459204  |
| H | 1.8734405  | 1.5739526  | -1.0099231 |
| H | 4.1622669  | 0.9881452  | -1.5920911 |
| H | 4.1357406  | -2.1651869 | 1.3438437  |
| H | 1.8303243  | -1.5661947 | 1.9608623  |
| H | -2.4854228 | -2.5150276 | 1.4474445  |
| H | -2.7010347 | -0.8374108 | 1.9344292  |
| H | -0.1626125 | 4.0470341  | 1.0473169  |
| H | 0.4773843  | 3.0118891  | 2.3611732  |
| H | 1.3588897  | 3.1241479  | 0.7991649  |
| H | -1.5732378 | 2.8147955  | -1.1957141 |
| H | -0.8750175 | 1.2381862  | -1.6476258 |
| H | 0.1951415  | 2.6757949  | -1.4018457 |
| H | -4.6653632 | -2.5160903 | 0.2985468  |
| H | -4.9322976 | -1.7633391 | 1.8809789  |
| H | -4.6074379 | 0.4955724  | 0.8325866  |
| H | -5.9568724 | -0.3771968 | 0.0720208  |

5b\_sy\_7\_ts1.log

E = -1224.103166

H = -1223.764246

G = -1223.835392

NImag=1

|   |            |            |           |
|---|------------|------------|-----------|
| C | -0.8793319 | -0.4429035 | 1.4674044 |
| C | 0.3079970  | 1.2395960  | 0.6195328 |
| C | 1.5963067  | 0.6555757  | 0.3696625 |
| C | 2.5374944  | 0.6212580  | 1.4314362 |



|   |            |            |            |
|---|------------|------------|------------|
| C | 3.7579618  | -0.0125646 | 1.2971548  |
| C | 4.0953490  | -0.6424841 | 0.0855791  |
| C | 3.1798696  | -0.6251869 | -0.9801666 |
| C | 1.9574021  | 0.0068426  | -0.8390285 |
| C | -1.8829508 | -0.9385470 | 0.6529613  |
| C | -1.5452092 | -1.8804638 | -0.4872252 |
| O | -4.2557329 | -1.0720063 | 0.1905141  |
| C | -3.2406013 | -0.5027656 | 0.8996173  |
| O | -3.5760292 | 0.3574832  | 1.7179665  |
| S | -0.6772407 | 1.6631651  | -0.7664087 |
| C | -1.9959375 | 2.5948906  | 0.0279331  |
| C | 0.1743910  | 3.0121528  | -1.6267449 |
| C | 5.3580485  | -1.2963039 | -0.0607290 |
| N | 6.3834896  | -1.8280338 | -0.1789640 |
| C | -2.7159334 | -1.9916594 | -1.4560614 |
| C | -3.9795152 | -2.2030739 | -0.6495089 |
| H | 0.0626227  | -0.9836575 | 1.5173230  |
| H | -1.1502062 | 0.1187374  | 2.3568956  |
| H | 0.2466346  | 1.9895243  | 1.4061385  |
| H | 2.2881886  | 1.1084288  | 2.3701795  |
| H | 4.4614914  | -0.0229941 | 2.1242663  |
| H | 3.4344980  | -1.1112666 | -1.9170846 |
| H | 1.2713378  | -0.0080474 | -1.6826098 |
| H | -0.6505153 | -1.5206443 | -1.0090246 |
| H | -1.3015902 | -2.8824333 | -0.1043576 |
| H | -2.6877095 | 2.9159509  | -0.7525816 |
| H | -2.4980603 | 1.9319180  | 0.7363579  |
| H | -1.5558479 | 3.4555765  | 0.5362027  |
| H | -0.4905086 | 3.3802552  | -2.4115496 |
| H | 1.0817227  | 2.6003941  | -2.0724308 |
| H | 0.4154238  | 3.8001474  | -0.9112911 |
| H | -2.8199510 | -1.0720058 | -2.0459613 |
| H | -2.5822963 | -2.8254326 | -2.1519840 |
| H | -3.8881121 | -3.0963557 | -0.0173575 |
| H | -4.8642500 | -2.3122345 | -1.2797148 |

5b\_sy\_8.log

E = -1224.135715  
H = -1223.793674  
G = -1223.863432

NImag=0

|   |            |            |            |
|---|------------|------------|------------|
| C | 1.4474405  | -4.3238175 | -3.2140527 |
| C | 0.1387948  | -3.6098308 | -2.8074773 |
| C | -1.0776608 | -4.1804707 | -3.4939828 |
| C | -1.8726329 | -3.3496117 | -4.2896519 |
| C | -2.9782898 | -3.8596417 | -4.9606795 |
| C | -3.2942870 | -5.2158880 | -4.8234245 |
| C | -2.5096402 | -6.0592127 | -4.0267577 |
| C | -1.4026474 | -5.5377993 | -3.3694761 |
| C | 2.7147759  | -3.6941118 | -2.7218112 |
| C | 3.3864877  | -2.6485477 | -3.5797270 |
| O | 4.3241959  | -3.4911309 | -0.9484962 |
| C | 3.1793606  | -4.0954359 | -1.4861108 |
| O | 2.6563928  | -4.9604178 | -0.7242239 |
| S | -0.1544646 | -3.7366846 | -0.9722028 |
| C | 0.8669165  | -2.4348034 | -0.2404066 |
| C | -1.7584019 | -2.9077096 | -0.8557574 |
| C | -4.4413086 | -5.7507131 | -5.5078535 |
| N | -5.3649385 | -6.1804404 | -6.0587498 |
| C | 4.7888191  | -2.3572566 | -3.0514923 |
| C | 4.7207559  | -2.2583028 | -1.5384008 |

|   |            |            |            |
|---|------------|------------|------------|
| H | 1.3752812  | -5.3701681 | -2.8942214 |
| H | 1.4221153  | -4.3207579 | -4.3135280 |
| H | 0.2064229  | -2.5324254 | -2.9945481 |
| H | -1.6237815 | -2.2966353 | -4.3846895 |
| H | -3.5947291 | -3.2168710 | -5.5803959 |
| H | -2.7669872 | -7.1085490 | -3.9287444 |
| H | -0.7958687 | -6.1959730 | -2.7534091 |
| H | 3.4438377  | -2.9864137 | -4.6257754 |
| H | 2.8138426  | -1.7038327 | -3.6066691 |
| H | 0.3546624  | -2.1358644 | 0.6770335  |
| H | 1.8360975  | -2.8695827 | -0.0067953 |
| H | 0.9392094  | -1.5924340 | -0.9312688 |
| H | -1.9544736 | -2.7476711 | 0.2061735  |
| H | -2.5205778 | -3.5662890 | -1.2731730 |
| H | -1.7253444 | -1.9553606 | -1.3899415 |
| H | 5.4730112  | -3.1728857 | -3.3175486 |
| H | 5.1945728  | -1.4286391 | -3.4673032 |
| H | 4.0054556  | -1.4710300 | -1.2497250 |
| H | 5.6924857  | -2.0137900 | -1.0999357 |

5b\_sy\_8\_ts1.log

E = -1224.103061  
H = -1223.763899  
G = -1223.835509

NImag=1

|   |            |            |            |
|---|------------|------------|------------|
| C | 0.7399814  | -0.9007599 | 0.5313663  |
| C | -0.3193895 | 0.6752494  | -0.5426704 |
| C | -1.6910196 | 0.2769158  | -0.3229412 |
| C | -2.2571154 | -0.6919963 | -1.1887618 |
| C | -3.5224144 | -1.2070766 | -0.9716510 |
| C | -4.2772171 | -0.7712967 | 0.1302977  |
| C | -3.7331537 | 0.1783708  | 1.0110594  |
| C | -2.4642202 | 0.6851643  | 0.7919779  |
| C | 2.0771141  | -1.0726056 | 0.2230208  |
| C | 2.4815232  | -1.7458496 | -1.0689068 |
| O | 4.3863481  | -0.6646405 | 0.8294491  |
| C | 3.0623699  | -0.5308755 | 1.1310826  |
| O | 2.8128734  | 0.0311660  | 2.1997054  |
| S | 0.1161235  | 2.2618066  | 0.0479764  |
| C | 1.9156673  | 2.2952438  | -0.0243567 |
| C | -0.2572105 | 3.4097477  | -1.3057500 |
| C | -5.5891748 | -1.2943424 | 0.3571307  |
| N | -6.6536718 | -1.7190452 | 0.5413257  |
| C | 3.9269627  | -2.2230266 | -0.9939123 |
| C | 4.7758497  | -1.0752249 | -0.4906437 |
| H | 0.4611561  | -0.5352281 | 1.5169984  |
| H | 0.0177517  | -1.5628657 | 0.0570841  |
| H | 0.0834768  | 0.4972274  | -1.5397461 |
| H | -1.6824554 | -1.0302983 | -2.0469623 |
| H | -3.9371057 | -1.9438332 | -1.6528832 |
| H | -4.3097805 | 0.5095927  | 1.8692888  |
| H | -2.0662966 | 1.4071392  | 1.4991635  |
| H | 1.8017968  | -2.5799734 | -1.2812976 |
| H | 2.3885976  | -1.0461717 | -1.9155836 |
| H | 2.2078069  | 3.3470837  | -0.0205613 |
| H | 2.2964350  | 1.7967852  | 0.8672746  |
| H | 2.2558025  | 1.8041682  | -0.9393782 |
| H | 0.0735271  | 4.4082028  | -1.0107094 |
| H | -1.3390603 | 3.3988530  | -1.4486153 |
| H | 0.2584511  | 3.0746169  | -2.2083045 |
| H | 4.0194219  | -3.0703501 | -0.3035865 |

|   |           |            |            |
|---|-----------|------------|------------|
| H | 4.2958228 | -2.5427530 | -1.9734437 |
| H | 4.6902185 | -0.2116230 | -1.1638442 |
| H | 5.8307014 | -1.3437722 | -0.4051387 |

5b\_sy\_9.log

E = -1224.135248  
H = -1223.793312  
G = -1223.863493

NImag=0

|   |            |            |            |
|---|------------|------------|------------|
| C | 1.5343253  | -4.1641144 | -3.4552792 |
| C | 0.2266497  | -3.6912613 | -2.8098239 |
| C | -1.0289150 | -4.2139156 | -3.4585312 |
| C | -1.2070810 | -5.5827678 | -3.6993397 |
| C | -2.3701466 | -6.0479223 | -4.2993130 |
| C | -3.3629449 | -5.1325809 | -4.6717952 |
| C | -3.1985399 | -3.7625167 | -4.4413461 |
| C | -2.0325145 | -3.3138222 | -3.8312447 |
| C | 2.7723123  | -3.8272217 | -2.6689520 |
| C | 3.7744005  | -4.9310140 | -2.4085631 |
| O | 4.1397762  | -2.1383872 | -1.6410281 |
| C | 3.0140527  | -2.4926467 | -2.3909417 |
| O | 2.2898554  | -1.5101343 | -2.7173451 |
| S | 0.2926767  | -4.2117884 | -1.0119676 |
| C | 0.9878698  | -2.7846035 | -0.1329057 |
| C | -1.4402294 | -4.0309440 | -0.5187363 |
| C | -4.5678797 | -5.6082162 | -5.2989758 |
| N | -5.5374816 | -5.9909915 | -5.8034097 |
| C | 5.1129026  | -4.3388795 | -1.9758493 |
| C | 4.8438897  | -3.2002479 | -1.0088346 |
| H | 1.4846249  | -5.2504658 | -3.5990948 |
| H | 1.5213116  | -3.7160135 | -4.4629995 |
| H | 0.2123800  | -2.5989707 | -2.7630028 |
| H | -0.4416794 | -6.2978807 | -3.4107498 |
| H | -2.5123988 | -7.1078913 | -4.4813811 |
| H | -3.9747963 | -3.0634405 | -4.7342774 |
| H | -1.8982852 | -2.2527803 | -3.6417401 |
| H | 3.4228892  | -5.6317947 | -1.6312805 |
| H | 3.9164019  | -5.5421411 | -3.3129673 |
| H | 0.3260417  | -2.5594071 | 0.7050562  |
| H | 1.9775551  | -3.0695877 | 0.2222557  |
| H | 1.0637989  | -1.9425310 | -0.8262288 |
| H | -1.4707296 | -4.1631345 | 0.5641920  |
| H | -2.0270910 | -4.8132332 | -1.0003941 |
| H | -1.8018422 | -3.0383669 | -0.7968887 |
| H | 5.7538652  | -5.0893759 | -1.5010992 |
| H | 5.6510130  | -3.9364373 | -2.8434728 |
| H | 5.7685119  | -2.7604678 | -0.6244455 |
| H | 4.2574510  | -3.5711039 | -0.1526992 |

5b\_sy\_9\_ts1.log

E = -1224.103900  
H = -1223.765034  
G = -1223.836508

NImag=1

|   |            |            |            |
|---|------------|------------|------------|
| C | -0.9581004 | -0.2032247 | 1.5677318  |
| C | 0.2459503  | 1.3998271  | 0.6146881  |
| C | 1.5077980  | 0.7684685  | 0.3452799  |
| C | 1.8134008  | 0.0716835  | -0.8516801 |
| C | 3.0118755  | -0.6015345 | -1.0077731 |
| C | 3.9583892  | -0.6131583 | 0.0306549  |

|   |            |            |            |
|---|------------|------------|------------|
| C | 3.6769266  | 0.0659143  | 1.2298768  |
| C | 2.4801123  | 0.7400249  | 1.3792743  |
| C | -1.7907150 | -0.9015929 | 0.7117614  |
| C | -1.2366272 | -1.9768630 | -0.1984286 |
| O | -4.0387217 | -1.2489730 | -0.1271401 |
| C | -3.2000257 | -0.5636091 | 0.7001819  |
| O | -3.7372278 | 0.2764298  | 1.4258016  |
| S | -0.7740811 | 1.7957750  | -0.7504259 |
| C | -2.1042332 | 2.6976462  | 0.0595567  |
| C | 0.0318797  | 3.1573342  | -1.6343145 |
| C | 5.1965832  | -1.3088073 | -0.1312025 |
| N | 6.2021122  | -1.8745417 | -0.2621567 |
| C | -2.3430493 | -2.9340667 | -0.6245633 |
| C | -3.4987547 | -2.1065814 | -1.1449825 |
| H | -0.0053488 | -0.6459177 | 1.8484892  |
| H | -1.4000959 | 0.4713384  | 2.2959707  |
| H | 0.2304034  | 2.1757771  | 1.3781565  |
| H | 1.1033289  | 0.0533943  | -1.6748008 |
| H | 3.2243158  | -1.1237318 | -1.9357908 |
| H | 4.4048166  | 0.0610143  | 2.0356930  |
| H | 2.2742222  | 1.2647294  | 2.3083021  |
| H | -0.7983788 | -1.5336728 | -1.1048313 |
| H | -0.4229797 | -2.5072866 | 0.3120372  |
| H | -1.6724180 | 3.5246946  | 0.6271683  |
| H | -2.7692480 | 3.0685299  | -0.7223888 |
| H | -2.6365048 | 2.0001758  | 0.7103749  |
| H | -0.6474169 | 3.4980111  | -2.4189376 |
| H | 0.9467333  | 2.7629753  | -2.0806212 |
| H | 0.2574985  | 3.9603694  | -0.9305275 |
| H | -2.0038073 | -3.6149877 | -1.4112854 |
| H | -2.6837213 | -3.5385618 | 0.2250034  |
| H | -4.3390974 | -2.7223430 | -1.4715876 |
| H | -3.1737530 | -1.4836941 | -1.9892205 |

5b\_sy\_c\_prod\_1.log

E = -746.250103

H = -745.991712

G = -746.049796

NImag=0

|   |           |           |            |
|---|-----------|-----------|------------|
| C | 4.8095565 | 1.1437029 | 2.6980785  |
| O | 4.2233227 | 2.4326599 | 2.9967380  |
| C | 3.9231695 | 3.3265662 | 2.0439640  |
| C | 4.0685545 | 2.9404180 | 0.6040497  |
| C | 4.7404686 | 1.6186391 | 0.2848192  |
| C | 4.3672259 | 0.6039644 | 1.3569006  |
| O | 3.4980471 | 4.4110338 | 2.3912189  |
| C | 2.9152774 | 3.4109211 | -0.2647363 |
| C | 4.2226593 | 4.1170914 | -0.3528280 |
| C | 5.1543629 | 3.9787064 | -1.5107852 |
| C | 4.7346838 | 3.5188632 | -2.7632995 |
| C | 5.6361784 | 3.3995801 | -3.8160031 |
| C | 6.9766748 | 3.7464676 | -3.6153472 |
| C | 7.4143396 | 4.2140377 | -2.3685232 |
| C | 6.5011850 | 4.3262963 | -1.3295021 |
| C | 7.9131397 | 3.6255843 | -4.6996914 |
| N | 8.6677681 | 3.5276076 | -5.5732856 |
| H | 5.8980275 | 1.2634007 | 2.7277455  |
| H | 4.5031453 | 0.5032285 | 3.5262952  |
| H | 4.4393586 | 1.2813108 | -0.7111196 |
| H | 5.8314269 | 1.7458362 | 0.2716031  |
| H | 3.2850416 | 0.4260921 | 1.3606079  |

|   |           |            |            |
|---|-----------|------------|------------|
| H | 4.8673158 | -0.3541216 | 1.1879476  |
| H | 2.6290961 | 2.7296137  | -1.0602405 |
| H | 2.1024961 | 3.9328776  | 0.2278699  |
| H | 4.2736731 | 5.0774106  | 0.1534246  |
| H | 3.6939534 | 3.2575013  | -2.9260962 |
| H | 5.3067955 | 3.0454296  | -4.7874392 |
| H | 8.4559226 | 4.4815120  | -2.2235792 |
| H | 6.8332338 | 4.6863685  | -0.3593862 |

5b\_sy\_c\_prod\_2.log

E = -746.250315  
H = -745.991930  
G = -746.051214

NImag=0

|   |           |           |            |
|---|-----------|-----------|------------|
| C | 4.9386519 | 1.1278809 | 2.4479539  |
| O | 4.4224790 | 2.4129906 | 2.8711143  |
| C | 3.8026635 | 3.2615337 | 2.0382858  |
| C | 3.7793943 | 2.9571848 | 0.5724771  |
| C | 4.1708058 | 1.5574332 | 0.1501707  |
| C | 5.3557008 | 1.1088500 | 0.9944590  |
| O | 3.3269514 | 4.2774892 | 2.5058270  |
| C | 2.8041503 | 3.7500020 | -0.2521826 |
| C | 4.2344288 | 4.1704349 | -0.2633984 |
| C | 5.1579187 | 3.9803908 | -1.4171647 |
| C | 4.7188595 | 3.5854759 | -2.6861498 |
| C | 5.6213949 | 3.4161257 | -3.7308146 |
| C | 6.9831682 | 3.6474605 | -3.5079967 |
| C | 7.4410095 | 4.0495589 | -2.2459521 |
| C | 6.5269617 | 4.2123880 | -1.2145771 |
| C | 7.9208170 | 3.4770266 | -4.5845213 |
| N | 8.6767856 | 3.3393894 | -5.4515791 |
| H | 5.7725534 | 0.9297912 | 3.1229479  |
| H | 4.1520341 | 0.3882918 | 2.6322207  |
| H | 3.3256721 | 0.8756848 | 0.3094900  |
| H | 4.4044635 | 1.5381308 | -0.9179892 |
| H | 5.6680265 | 0.0915129 | 0.7410027  |
| H | 6.2116500 | 1.7767231 | 0.8350262  |
| H | 2.4084592 | 3.2312168 | -1.1200502 |
| H | 2.1057046 | 4.3883689 | 0.2771455  |
| H | 4.4706015 | 5.0381819 | 0.3465067  |
| H | 3.6631394 | 3.4140811 | -2.8704548 |
| H | 5.2762176 | 3.1117461 | -4.7135014 |
| H | 8.4986523 | 4.2301274 | -2.0836048 |
| H | 6.8747850 | 4.5255282 | -0.2337906 |

5b\_sy\_c\_prod\_4.log

E = -746.250173  
H = -745.991571  
G = -746.049317

NImag=0

|   |           |           |            |
|---|-----------|-----------|------------|
| C | 4.9976960 | 1.0470667 | 2.5279172  |
| O | 4.5450206 | 2.3540571 | 2.9518136  |
| C | 4.2153386 | 3.3174138 | 2.0807331  |
| C | 4.1980854 | 3.0104879 | 0.6132045  |
| C | 4.6988946 | 1.6510108 | 0.1599459  |
| C | 4.3625901 | 0.6166891 | 1.2257811  |
| O | 3.9017493 | 4.4049476 | 2.5237715  |
| C | 3.0448268 | 3.6594080 | -0.1245163 |
| C | 4.4094154 | 4.2384084 | -0.2755142 |
| C | 5.2395037 | 4.1206204 | -1.5072952 |

|   |           |            |            |
|---|-----------|------------|------------|
| C | 4.8193219 | 3.4347624  | -2.6540742 |
| C | 5.6405967 | 3.3464612  | -3.7721049 |
| C | 6.9007968 | 3.9552891  | -3.7521670 |
| C | 7.3362094 | 4.6514729  | -2.6172272 |
| C | 6.5042076 | 4.7279166  | -1.5087565 |
| C | 7.7515864 | 3.8713708  | -4.9078603 |
| N | 8.4377443 | 3.8031741  | -5.8389419 |
| H | 6.0883173 | 1.0895373  | 2.4335695  |
| H | 4.7412220 | 0.3849160  | 3.3560309  |
| H | 4.2475443 | 1.3884354  | -0.8003312 |
| H | 5.7871431 | 1.6794630  | 0.0153695  |
| H | 3.2765308 | 0.5277133  | 1.3496482  |
| H | 4.7543666 | -0.3683942 | 0.9564141  |
| H | 2.6263956 | 3.0760250  | -0.9386717 |
| H | 2.3346275 | 4.2292708  | 0.4642144  |
| H | 4.5935013 | 5.1451025  | 0.2932175  |
| H | 3.8398164 | 2.9684328  | -2.6866468 |
| H | 5.3085185 | 2.8159951  | -4.6585883 |
| H | 8.3126476 | 5.1249912  | -2.6111889 |
| H | 6.8358853 | 5.2688549  | -0.6268466 |

5b\_sy\_tr\_prod\_1.log

E = -746.248951

H = -745.990772

G = -746.048930

NImag=0

|   |            |            |            |
|---|------------|------------|------------|
| C | 2.9207190  | -0.5288732 | 2.5017430  |
| O | 3.2425904  | -0.9632838 | 3.8453742  |
| C | 3.1441826  | -2.2417954 | 4.2452826  |
| C | 2.4053346  | -3.2068380 | 3.3714340  |
| C | 2.2420900  | -2.8216915 | 1.9162762  |
| C | 1.8351445  | -1.3563436 | 1.8495439  |
| O | 3.6048065  | -2.5393627 | 5.3282013  |
| C | 2.4568146  | -4.6549718 | 3.7726667  |
| C | 1.2113866  | -3.8833974 | 4.0553892  |
| C | 0.7792008  | -3.5236460 | 5.4392472  |
| C | 1.0683442  | -4.3393699 | 6.5368999  |
| C | 0.6300649  | -3.9971054 | 7.8113851  |
| C | -0.1076025 | -2.8209533 | 7.9906361  |
| C | -0.4082139 | -1.9926736 | 6.9008314  |
| C | 0.0361257  | -2.3517179 | 5.6354369  |
| C | -0.5644157 | -2.4604538 | 9.3056219  |
| N | -0.9328600 | -2.1701815 | 10.3650309 |
| H | 2.6347383  | 0.5181992  | 2.6109723  |
| H | 3.8462925  | -0.5823434 | 1.9182116  |
| H | 3.1899554  | -2.9674243 | 1.3819701  |
| H | 1.4976038  | -3.4738655 | 1.4501152  |
| H | 1.7199405  | -1.0147093 | 0.8165643  |
| H | 0.8790297  | -1.2051248 | 2.3655511  |
| H | 2.4383798  | -5.3772156 | 2.9627701  |
| H | 3.0956061  | -4.8982361 | 4.6153695  |
| H | 0.3821177  | -4.0284377 | 3.3651137  |
| H | 1.6414046  | -5.2506464 | 6.3955801  |
| H | 0.8543824  | -4.6313376 | 8.6629165  |
| H | -0.9805793 | -1.0831304 | 7.0514126  |
| H | -0.1910838 | -1.7141692 | 4.7846522  |

5b\_sy\_tr\_prod\_2.log

E = -746.246987

H = -745.988866

G = -746.046869  
 NImag=0

|   |            |            |            |
|---|------------|------------|------------|
| C | 3.2035213  | -0.6247474 | 2.1754046  |
| O | 3.4807642  | -0.9489468 | 3.5572460  |
| C | 2.9941082  | -2.0465160 | 4.1583570  |
| C | 2.1449152  | -2.9952188 | 3.3698592  |
| C | 1.8400305  | -2.6476704 | 1.9222444  |
| C | 3.0001780  | -1.8616412 | 1.3301320  |
| O | 3.2968468  | -2.2371310 | 5.3191944  |
| C | 2.3480542  | -4.4532893 | 3.7533338  |
| C | 1.0802853  | -3.7742484 | 4.1304933  |
| C | 0.7003582  | -3.4797723 | 5.5451232  |
| C | 1.0297033  | -4.3560726 | 6.5830039  |
| C | 0.6294519  | -4.0936211 | 7.8881029  |
| C | -0.1135340 | -2.9380401 | 8.1581291  |
| C | -0.4570926 | -2.0522253 | 7.1277894  |
| C | -0.0497339 | -2.3319399 | 5.8303098  |
| C | -0.5317023 | -2.6588365 | 9.5049162  |
| N | -0.8693727 | -2.4337704 | 10.5902361 |
| H | 2.3108656  | 0.0100878  | 2.1549656  |
| H | 4.0627293  | -0.0345513 | 1.8532404  |
| H | 1.6447726  | -3.5679420 | 1.3636853  |
| H | 0.9318790  | -2.0335128 | 1.8719185  |
| H | 3.9161896  | -2.4647865 | 1.3202125  |
| H | 2.7871604  | -1.5522834 | 0.3027831  |
| H | 2.3319849  | -5.1692787 | 2.9381150  |
| H | 3.0656969  | -4.6412002 | 4.5454237  |
| H | 0.2230392  | -3.9846982 | 3.4920168  |
| H | 1.6080869  | -5.2500146 | 6.3691937  |
| H | 0.8864816  | -4.7737019 | 8.6937943  |
| H | -1.0335810 | -1.1598780 | 7.3493558  |
| H | -0.3091866 | -1.6485525 | 5.0258200  |

5b\_sy\_tr\_prod\_3.log  
 E = -746.248288  
 H = -745.989724  
 G = -746.046959  
 NImag=0

|   |            |            |            |
|---|------------|------------|------------|
| C | 2.2869119  | -0.7238666 | 3.2594281  |
| O | 3.2399484  | -1.2935731 | 4.1865338  |
| C | 3.3099096  | -2.6330968 | 4.2462814  |
| C | 2.3937752  | -3.3588082 | 3.3096291  |
| C | 2.3798272  | -2.8183260 | 1.8840692  |
| C | 2.5257620  | -1.2839972 | 1.8702201  |
| O | 4.0683524  | -3.1563457 | 5.0338509  |
| C | 2.1171685  | -4.7961923 | 3.5838756  |
| C | 1.0576926  | -3.7918890 | 3.9381488  |
| C | 0.6897737  | -3.4288041 | 5.3342520  |
| C | 1.3837395  | -3.8958870 | 6.4592017  |
| C | 1.0036817  | -3.5097066 | 7.7392815  |
| C | -0.0863924 | -2.6481024 | 7.9073863  |
| C | -0.7959015 | -2.1747867 | 6.7960713  |
| C | -0.4026676 | -2.5674967 | 5.5244179  |
| C | -0.4854419 | -2.2532372 | 9.2306552  |
| N | -0.8074882 | -1.9350901 | 10.2972140 |
| H | 1.2740163  | -0.9398903 | 3.6183053  |
| H | 2.4571930  | 0.3516745  | 3.3070220  |
| H | 3.1962419  | -3.2819408 | 1.3212676  |
| H | 1.4445385  | -3.1312921 | 1.4105986  |
| H | 3.5335310  | -0.9965117 | 1.5544058  |
| H | 1.8199771  | -0.8228434 | 1.1741300  |

|   |            |            |           |
|---|------------|------------|-----------|
| H | 1.9255204  | -5.4285692 | 2.7226001 |
| H | 2.6730490  | -5.2638177 | 4.3901901 |
| H | 0.2287915  | -3.7034466 | 3.2402050 |
| H | 2.2261880  | -4.5691570 | 6.3455469 |
| H | 1.5433781  | -3.8771139 | 8.6060472 |
| H | -1.6431686 | -1.5109152 | 6.9336207 |
| H | -0.9528072 | -2.2067708 | 4.6596436 |

5b\_sy\_tr\_prod\_5.log

E = -746.243114  
H = -745.984816  
G = -746.042902

NImag=0

|   |            |            |            |
|---|------------|------------|------------|
| C | 4.1267429  | -1.8185276 | 2.0635387  |
| O | 3.9722809  | -1.3518309 | 3.4218719  |
| C | 2.9378045  | -1.8317948 | 4.1364830  |
| C | 2.0368273  | -2.7705442 | 3.3953950  |
| C | 1.6918438  | -2.3697824 | 1.9615793  |
| C | 2.8391290  | -1.5874231 | 1.2999403  |
| O | 2.8299686  | -1.5071911 | 5.2989121  |
| C | 2.3217081  | -4.2329910 | 3.7004952  |
| C | 1.0334138  | -3.6145427 | 4.1437891  |
| C | 0.6639169  | -3.4172696 | 5.5785413  |
| C | 1.2540235  | -4.1565294 | 6.6075101  |
| C | 0.8671427  | -3.9692017 | 7.9299054  |
| C | -0.1323293 | -3.0361363 | 8.2283150  |
| C | -0.7485769 | -2.3006707 | 7.2058988  |
| C | -0.3494778 | -2.5011986 | 5.8924746  |
| C | -0.5369404 | -2.8366497 | 9.5929895  |
| N | -0.8630742 | -2.6753808 | 10.6931907 |
| H | 4.9588237  | -1.2408896 | 1.6605264  |
| H | 4.4048071  | -2.8784147 | 2.0825161  |
| H | 1.4716620  | -3.2848242 | 1.4030658  |
| H | 0.7784314  | -1.7668520 | 1.9674058  |
| H | 2.9758699  | -1.8890287 | 0.2579497  |
| H | 2.6281636  | -0.5131856 | 1.3069233  |
| H | 2.3079782  | -4.9199414 | 2.8601962  |
| H | 3.0722791  | -4.4377770 | 4.4588437  |
| H | 0.1726421  | -3.8439497 | 3.5173488  |
| H | 2.0252243  | -4.8857241 | 6.3798672  |
| H | 1.3293378  | -4.5422796 | 8.7272873  |
| H | -1.5275695 | -1.5844226 | 7.4463553  |
| H | -0.8215530 | -1.9331461 | 5.0952845  |

5b\_tr\_1\_ts2.log

E = -1224.125656  
H = -1223.785315  
G = -1223.856115

NImag=1

|   |            |            |            |
|---|------------|------------|------------|
| C | 1.5508100  | 0.5075769  | 0.9652211  |
| C | 0.6520416  | 0.8207856  | -0.1828532 |
| C | -0.7719721 | 0.3865795  | -0.1701835 |
| C | -1.5344270 | 0.3920033  | 1.0063114  |
| C | -2.8734157 | 0.0202701  | 0.9822259  |
| C | -3.4599970 | -0.3589342 | -0.2306471 |
| C | -2.7141715 | -0.3626687 | -1.4174445 |
| C | -1.3797080 | 0.0150486  | -1.3783524 |
| C | 1.6962327  | -0.9512395 | 0.6148086  |
| C | 0.9286488  | -1.9956946 | 1.3830935  |
| O | 2.7907471  | -2.5786256 | -0.7825403 |



|   |            |            |            |
|---|------------|------------|------------|
| C | 2.5790062  | -1.2538762 | -0.4380475 |
| O | 3.2038399  | -0.4230407 | -1.1309398 |
| S | 0.4065232  | 2.9967276  | -0.3968002 |
| C | 0.4034172  | 3.5105477  | 1.3324113  |
| C | 2.0861418  | 3.4451155  | -0.8813512 |
| C | -4.8444369 | -0.7469468 | -0.2588454 |
| N | -5.9597044 | -1.0592217 | -0.2815345 |
| C | 0.9401131  | -3.3164707 | 0.6204064  |
| C | 2.3525037  | -3.5804525 | 0.1356177  |
| H | 2.4918127  | 1.0619170  | 0.9179992  |
| H | 1.0817366  | 0.6564494  | 1.9411760  |
| H | 1.1481490  | 0.7119148  | -1.1463525 |
| H | -1.0850721 | 0.6859336  | 1.9499868  |
| H | -3.4628912 | 0.0232492  | 1.8930794  |
| H | -3.1795838 | -0.6590185 | -2.3516151 |
| H | -0.7924479 | 0.0165839  | -2.2926187 |
| H | 1.3624512  | -2.1510290 | 2.3852201  |
| H | -0.1071169 | -1.6735317 | 1.5570116  |
| H | 0.4223049  | 4.6014766  | 1.3733156  |
| H | -0.5206421 | 3.1470096  | 1.7868379  |
| H | 1.2711983  | 3.0976932  | 1.8502801  |
| H | 2.1842948  | 4.5322093  | -0.8523144 |
| H | 2.2383703  | 3.0919960  | -1.9031293 |
| H | 2.8113531  | 2.9823193  | -0.2096373 |
| H | 0.6062395  | -4.1474664 | 1.2502376  |
| H | 0.2710246  | -3.2591284 | -0.2480043 |
| H | 2.4321570  | -4.5278943 | -0.4032565 |
| H | 3.0439424  | -3.6099950 | 0.9908074  |

5b\_tr\_2\_ts2.log

E = -1224.125901

H = -1223.785485

G = -1223.856194

NImag=1

|   |            |            |            |
|---|------------|------------|------------|
| C | 1.5619748  | 0.5415958  | 0.9589643  |
| C | 0.6493862  | 0.8542649  | -0.1778942 |
| C | -0.7579749 | 0.3713599  | -0.1693736 |
| C | -1.3854784 | 0.0888140  | -1.3920285 |
| C | -2.7068021 | -0.3311852 | -1.4343540 |
| C | -3.4205379 | -0.4629516 | -0.2348944 |
| C | -2.8131575 | -0.1780878 | 0.9933572  |
| C | -1.4871031 | 0.2375822  | 1.0204530  |
| C | 1.7170582  | -0.9129529 | 0.5999422  |
| C | 1.0045219  | -1.9723394 | 1.4028340  |
| O | 2.7624725  | -2.5097882 | -0.8657350 |
| C | 2.6040372  | -1.1969955 | -0.4559158 |
| O | 3.2938259  | -0.3614921 | -1.0764721 |
| S | 0.3322387  | 3.0249885  | -0.3342910 |
| C | 0.3069130  | 3.4762676  | 1.4119225  |
| C | 1.9944536  | 3.5507144  | -0.8002683 |
| C | -4.7917231 | -0.8946862 | -0.2660428 |
| N | -5.8965393 | -1.2421421 | -0.2912595 |
| C | 1.5995755  | -3.3457062 | 1.0975420  |
| C | 1.8002690  | -3.4561892 | -0.4013723 |
| H | 2.4967314  | 1.1057029  | 0.9052526  |
| H | 1.1013275  | 0.6773493  | 1.9405361  |
| H | 1.1424356  | 0.7843359  | -1.1470961 |
| H | -0.8240024 | 0.1960243  | -2.3163340 |
| H | -3.1871664 | -0.5566367 | -2.3807403 |
| H | -3.3764379 | -0.2826318 | 1.9147851  |
| H | -1.0227026 | 0.4544667  | 1.9774513  |

|   |            |            |            |
|---|------------|------------|------------|
| H | 1.0863870  | -1.7530210 | 2.4768414  |
| H | -0.0766308 | -2.0020202 | 1.1850842  |
| H | 0.2503827  | 4.5635475  | 1.4932006  |
| H | -0.5862131 | 3.0321460  | 1.8570624  |
| H | 1.2047451  | 3.1056277  | 1.9098975  |
| H | 2.0567774  | 4.6380151  | -0.7224284 |
| H | 2.1553298  | 3.2488671  | -1.8370678 |
| H | 2.7365850  | 3.0822451  | -0.1512357 |
| H | 2.5715702  | -3.4648139 | 1.5917408  |
| H | 0.9435551  | -4.1502643 | 1.4451085  |
| H | 0.8464960  | -3.2856792 | -0.9234993 |
| H | 2.1844171  | -4.4360283 | -0.6954177 |

5b\_tr\_3\_ts2.log

E = -1224.127013

H = -1223.786647

G = -1223.856848

NImag=1

|   |            |            |            |
|---|------------|------------|------------|
| C | 1.4523761  | 1.1478374  | 0.8958051  |
| C | 0.4299192  | 1.0733245  | -0.1866021 |
| C | -0.7022049 | 0.1206440  | -0.1233474 |
| C | -1.3015769 | -0.2524785 | 1.0897057  |
| C | -2.3976036 | -1.1072143 | 1.1023047  |
| C | -2.9020037 | -1.5980609 | -0.1075170 |
| C | -2.3166410 | -1.2362945 | -1.3287917 |
| C | -1.2269555 | -0.3783690 | -1.3268004 |
| C | 2.1727626  | -0.1209510 | 0.5264604  |
| C | 1.9524530  | -1.3755005 | 1.3301504  |
| O | 3.7747245  | -1.1646833 | -0.9364148 |
| C | 3.0372896  | -0.0467827 | -0.5803803 |
| O | 3.2101675  | 0.9525526  | -1.3104466 |
| S | -0.5432470 | 3.0602356  | -0.2339646 |
| C | -2.1582720 | 2.7783101  | -0.9880579 |
| C | -1.0349698 | 3.2375819  | 1.4918969  |
| C | -4.0329626 | -2.4862953 | -0.0961545 |
| N | -4.9438853 | -3.2017187 | -0.0872441 |
| C | 2.4975544  | -2.5836606 | 0.5747547  |
| C | 3.8602389  | -2.2272891 | 0.0129856  |
| H | 2.0700099  | 2.0471004  | 0.7960517  |
| H | 1.0268349  | 1.1067388  | 1.9022705  |
| H | 0.8675213  | 1.1836338  | -1.1765676 |
| H | -0.9147144 | 0.1198221  | 2.0328428  |
| H | -2.8608064 | -1.3953437 | 2.0401237  |
| H | -2.7146567 | -1.6259145 | -2.2597298 |
| H | -0.7673813 | -0.0884111 | -2.2679351 |
| H | 2.4435310  | -1.3087050 | 2.3155091  |
| H | 0.8839142  | -1.5218224 | 1.5432503  |
| H | -2.7333183 | 3.7050858  | -0.9293044 |
| H | -2.0007618 | 2.5111690  | -2.0347795 |
| H | -2.6823434 | 1.9742038  | -0.4651566 |
| H | -1.6775103 | 4.1162681  | 1.5803818  |
| H | -0.1331005 | 3.3846472  | 2.0880960  |
| H | -1.5735585 | 2.3470419  | 1.8246837  |
| H | 2.5841953  | -3.4592219 | 1.2263007  |
| H | 1.8295170  | -2.8447649 | -0.2561660 |
| H | 4.3164003  | -3.0640124 | -0.5219702 |
| H | 4.5364092  | -1.9276084 | 0.8275137  |

5b\_tr\_4\_ts2.log

E = -1224.127615

H = -1223.787294  
G = -1223.858876  
NImag=1

|   |            |            |            |
|---|------------|------------|------------|
| C | 1.5179439  | 0.4064664  | 1.3042761  |
| C | 0.6313567  | 0.8617066  | 0.1975199  |
| C | -0.7702730 | 0.3680853  | 0.1135604  |
| C | -1.5958532 | 0.3314477  | 1.2457589  |
| C | -2.9074338 | -0.1144554 | 1.1482270  |
| C | -3.3997321 | -0.5298757 | -0.0955910 |
| C | -2.5899267 | -0.4940433 | -1.2376429 |
| C | -1.2823149 | -0.0383033 | -1.1255560 |
| C | 1.7721604  | -0.9467063 | 0.6951136  |
| C | 1.0119286  | -2.1563036 | 1.1750592  |
| O | 2.9915540  | -2.1883984 | -0.9696295 |
| C | 2.7054419  | -0.9804501 | -0.3565335 |
| O | 3.3110679  | 0.0079922  | -0.8254571 |
| S | 0.3579943  | 3.0189818  | 0.3549849  |
| C | 2.0714960  | 3.4573032  | -0.0107796 |
| C | -0.3899416 | 3.2974122  | -1.2635941 |
| C | -4.7561708 | -0.9969268 | -0.2005713 |
| N | -5.8486466 | -1.3724507 | -0.2846058 |
| C | 1.1107217  | -3.2726826 | 0.1400215  |
| C | 2.5532216  | -3.3805140 | -0.3169428 |
| H | 2.4195747  | 1.0193294  | 1.3926020  |
| H | 1.0079599  | 0.3494127  | 2.2695455  |
| H | 1.1456461  | 0.9299609  | -0.7609632 |
| H | -1.2151963 | 0.6579771  | 2.2092967  |
| H | -3.5485452 | -0.1427842 | 2.0230290  |
| H | -2.9835854 | -0.8202214 | -2.1945336 |
| H | -0.6424598 | -0.0098215 | -2.0034030 |
| H | 1.4040140  | -2.5196281 | 2.1395321  |
| H | -0.0423291 | -1.9057850 | 1.3594108  |
| H | 2.0925238  | 4.4500561  | -0.4646813 |
| H | 2.6225691  | 3.4756242  | 0.9304427  |
| H | 2.5060222  | 2.7137486  | -0.6869040 |
| H | -0.3048120 | 4.3563931  | -1.5148301 |
| H | -1.4438765 | 3.0210663  | -1.1991366 |
| H | 0.1173788  | 2.6871811  | -2.0164032 |
| H | 0.7828949  | -4.2332082 | 0.5506651  |
| H | 0.4797314  | -3.0423817 | -0.7283836 |
| H | 2.6942486  | -4.1828621 | -1.0454346 |
| H | 3.2068962  | -3.5777993 | 0.5455933  |

5b\_tr\_6\_ts2.log

E = -1224.127318  
H = -1223.787017  
G = -1223.857505  
NImag=1

|   |            |            |            |
|---|------------|------------|------------|
| C | -1.4660561 | -1.1895380 | 0.8695136  |
| C | -0.4362973 | -1.1114735 | -0.2059816 |
| C | 0.6771972  | -0.1384414 | -0.1368755 |
| C | 1.2127075  | 0.3002425  | 1.0838757  |
| C | 2.2903929  | 1.1776522  | 1.1078161  |
| C | 2.8389248  | 1.6278981  | -0.0985659 |
| C | 2.3141382  | 1.2041524  | -1.3276533 |
| C | 1.2424767  | 0.3241887  | -1.3366987 |
| C | -2.1650941 | 0.0953091  | 0.5202606  |
| C | -1.9692123 | 1.3177967  | 1.3796387  |
| O | -3.6593071 | 1.2150862  | -0.9968427 |
| C | -3.0245832 | 0.0518571  | -0.5931674 |
| O | -3.2952324 | -0.9609733 | -1.2717003 |

|   |            |            |            |
|---|------------|------------|------------|
| S | 0.5596312  | -3.0845788 | -0.2202997 |
| C | 2.1825667  | -2.7962264 | -0.9550332 |
| C | 1.0293800  | -3.2203434 | 1.5153183  |
| C | 3.9508452  | 2.5393525  | -0.0763683 |
| N | 4.8469041  | 3.2732442  | -0.0588358 |
| C | -3.0277015 | 2.3676524  | 1.0473724  |
| C | -3.1677143 | 2.4428598  | -0.4606546 |
| H | -2.0933677 | -2.0799745 | 0.7523081  |
| H | -1.0450417 | -1.1681411 | 1.8784334  |
| H | -0.8620157 | -1.2321241 | -1.2005459 |
| H | 0.7876570  | -0.0367094 | 2.0239242  |
| H | 2.7037631  | 1.5164289  | 2.0519527  |
| H | 2.7443627  | 1.5644664  | -2.2560831 |
| H | 0.8299284  | -0.0127057 | -2.2839671 |
| H | -2.0227295 | 1.0465392  | 2.4436678  |
| H | -0.9708940 | 1.7674787  | 1.2367764  |
| H | 2.7650242  | -3.7166776 | -0.8740855 |
| H | 2.0385863  | -2.5457365 | -2.0077575 |
| H | 2.6909266  | -1.9799893 | -0.4356706 |
| H | 1.7139277  | -4.0643796 | 1.6233570  |
| H | 0.1262783  | -3.4071766 | 2.0982008  |
| H | 1.5164954  | -2.3000233 | 1.8475386  |
| H | -3.9975962 | 2.0876420  | 1.4764440  |
| H | -2.7538197 | 3.3502262  | 1.4448714  |
| H | -2.1936307 | 2.6717617  | -0.9191677 |
| H | -3.8833929 | 3.2081978  | -0.7709734 |

dimethylsulfide.log

E = -477.935305

H = -477.853025

G = -477.885651

NImag=0

|   |            |            |            |
|---|------------|------------|------------|
| S | -0.5213679 | 0.4129884  | 0.0001686  |
| C | -0.9604508 | 2.1713240  | -0.0001168 |
| H | -0.5733566 | 2.6659317  | -0.8949189 |
| H | -2.0504574 | 2.2446397  | 0.0017798  |
| H | -0.5701714 | 2.6670194  | 0.8926972  |
| C | 1.2826781  | 0.5860343  | -0.0031440 |
| H | 1.7156401  | -0.4169797 | -0.0033030 |
| H | 1.6180926  | 1.1171687  | -0.8978744 |
| H | 1.6212702  | 1.1182559  | 0.8897417  |

e\_pent\_sr\_oe\_1\_ts1.log

E = -1110.795242

H = -1110.470677

G = -1110.539754

NImag=1

|   |            |            |            |
|---|------------|------------|------------|
| C | -2.6943402 | -1.1638568 | 0.8372876  |
| C | -1.3711223 | -0.8127927 | 1.1100484  |
| C | -3.0945231 | -2.0906398 | -0.1765240 |
| O | -4.2909987 | -2.3524617 | -0.4122950 |
| C | -2.0250803 | -2.7730860 | -1.0170528 |
| C | -1.0467879 | -0.0949245 | 2.3959490  |
| C | -0.5432249 | 0.5528760  | -0.3246481 |
| S | -1.0531513 | 2.1915808  | 0.0385135  |
| C | 0.8836389  | 0.3125954  | -0.2682668 |
| C | -0.8106052 | 3.1445913  | -1.4856392 |
| C | -2.8502579 | 2.0792115  | 0.0354376  |
| C | 1.7946003  | 1.0634271  | 0.5137632  |
| C | 3.1291297  | 0.7053157  | 0.6055790  |

|   |            |            |            |
|---|------------|------------|------------|
| C | 3.6051921  | -0.4248545 | -0.0777911 |
| C | 2.7199116  | -1.1912966 | -0.8540427 |
| C | 1.3885637  | -0.8273392 | -0.9426604 |
| C | 4.9848036  | -0.7942568 | 0.0158687  |
| N | 6.1031397  | -1.0949311 | 0.0921307  |
| H | -3.4998131 | -0.6439160 | 1.3542348  |
| H | -0.5948359 | -1.4998665 | 0.7732376  |
| H | -1.2182090 | -3.1908686 | -0.4068934 |
| H | -2.4871027 | -3.5721389 | -1.5999870 |
| H | -1.5727884 | -2.0522774 | -1.7085490 |
| H | -0.0502793 | 0.3563009  | 2.3813660  |
| H | -1.0704963 | -0.8142871 | 3.2233092  |
| H | -1.7874433 | 0.6803384  | 2.6207121  |
| H | -1.0528943 | 0.1742595  | -1.2103784 |
| H | -1.2059151 | 4.1505661  | -1.3262744 |
| H | 0.2640204  | 3.1885141  | -1.6713742 |
| H | -1.3275113 | 2.6410479  | -2.3049685 |
| H | -3.2270601 | 3.1020269  | -0.0223698 |
| H | -3.1699728 | 1.6158744  | 0.9678137  |
| H | -3.1779106 | 1.4945075  | -0.8268106 |
| H | 1.4602273  | 1.9433057  | 1.0566168  |
| H | 3.8111305  | 1.2991836  | 1.2062333  |
| H | 3.0842768  | -2.0656762 | -1.3844908 |
| H | 0.7113004  | -1.4233903 | -1.5486331 |

e\_pent\_sr\_oe\_2\_ts1.log

E = -1110.790301

H = -1110.465579

G = -1110.534896

NImag=1

|   |            |            |            |
|---|------------|------------|------------|
| C | 1.7923580  | -1.7711137 | 0.1397215  |
| C | 1.5191701  | -1.0670904 | 1.3108653  |
| C | 3.0063176  | -1.6868861 | -0.6170087 |
| O | 3.2036217  | -2.3720307 | -1.6381475 |
| C | 4.1302422  | -0.7705505 | -0.1522999 |
| C | 0.5049741  | -1.6347605 | 2.2702951  |
| C | 0.4339671  | 0.8285233  | 1.0251025  |
| S | 1.4593741  | 1.9816548  | 0.1947949  |
| C | -0.8812899 | 0.4881932  | 0.5201233  |
| C | 1.8681711  | 1.3812012  | -1.4681847 |
| C | 0.4360490  | 3.4060790  | -0.2694955 |
| C | -1.1215164 | 0.1037538  | -0.8192276 |
| C | -2.3794248 | -0.3113416 | -1.2334225 |
| C | -3.4371670 | -0.3693270 | -0.3162977 |
| C | -3.2198260 | -0.0102871 | 1.0257008  |
| C | -1.9654597 | 0.4100380  | 1.4276985  |
| C | -4.7358740 | -0.7956764 | -0.7445997 |
| N | -5.7884157 | -1.1404207 | -1.0901399 |
| H | 1.0439319  | -2.4664349 | -0.2397876 |
| H | 2.3347162  | -0.5258770 | 1.7867767  |
| H | 3.7892910  | 0.1194309  | 0.3832216  |
| H | 4.7886497  | -1.3281019 | 0.5239891  |
| H | 4.7168952  | -0.4644734 | -1.0214061 |
| H | 0.1843236  | -0.9131408 | 3.0254407  |
| H | 0.9619709  | -2.4857041 | 2.7898172  |
| H | -0.3776149 | -2.0067890 | 1.7398195  |
| H | 0.4615430  | 1.1302227  | 2.0713495  |
| H | 2.8264844  | 1.8278202  | -1.7390974 |
| H | 1.9499805  | 0.2957128  | -1.4412429 |
| H | 1.0929186  | 1.6895717  | -2.1703710 |
| H | 1.0520615  | 4.0727798  | -0.8779846 |

|   |            |            |            |
|---|------------|------------|------------|
| H | 0.1335097  | 3.9054343  | 0.6521892  |
| H | -0.4335742 | 3.0592053  | -0.8315814 |
| H | -0.3192378 | 0.1108669  | -1.5473925 |
| H | -2.5442539 | -0.6006971 | -2.2667175 |
| H | -4.0389956 | -0.0544852 | 1.7367231  |
| H | -1.8048012 | 0.6949994  | 2.4638682  |

e\_pent\_sr\_oe\_3\_ts1.log

E = -1110.788381  
H = -1110.463604  
G = -1110.532292

NImag=1

|   |            |            |            |
|---|------------|------------|------------|
| C | 0.9113795  | -1.6950389 | 0.8094673  |
| C | 1.3708042  | -0.5558123 | 1.4703208  |
| C | 1.6387288  | -2.5435029 | -0.0883594 |
| O | 1.0816698  | -3.4543913 | -0.7331111 |
| C | 3.1525331  | -2.4436895 | -0.2071007 |
| C | 0.7666163  | -0.2004331 | 2.8068011  |
| C | 0.6468991  | 1.2783841  | 0.4924266  |
| S | 1.5651259  | 1.8337761  | -0.9204159 |
| C | -0.7206602 | 0.9272365  | 0.1885768  |
| C | 2.7055372  | 3.0134075  | -0.1770095 |
| C | 2.7422213  | 0.5466161  | -1.3986023 |
| C | -1.0483896 | 0.1664032  | -0.9575870 |
| C | -2.3466910 | -0.2609226 | -1.1913431 |
| C | -3.3565385 | 0.0387291  | -0.2663183 |
| C | -3.0505547 | 0.7735185  | 0.8938183  |
| C | -1.7556078 | 1.2082196  | 1.1111956  |
| C | -4.6976677 | -0.4051435 | -0.5010504 |
| N | -5.7849914 | -0.7636544 | -0.6901845 |
| H | -0.1273138 | -1.9886188 | 0.9676986  |
| H | 2.4212783  | -0.2880178 | 1.3673614  |
| H | 3.6065155  | -1.6629283 | 0.4037797  |
| H | 3.5674985  | -3.4078356 | 0.1049025  |
| H | 3.4332122  | -2.2932715 | -1.2548736 |
| H | 1.0259081  | 0.8078294  | 3.1382259  |
| H | 1.1455365  | -0.9084212 | 3.5541953  |
| H | -0.3234982 | -0.3007204 | 2.7896327  |
| H | 0.7972087  | 1.9981847  | 1.2940954  |
| H | 3.4409850  | 3.2855235  | -0.9358768 |
| H | 2.1307324  | 3.8903401  | 0.1227706  |
| H | 3.1892583  | 2.5471310  | 0.6837992  |
| H | 3.4321662  | 0.3431872  | -0.5801084 |
| H | 3.2746711  | 0.9259284  | -2.2736326 |
| H | 2.1686959  | -0.3401942 | -1.6715818 |
| H | -0.2771690 | -0.1009732 | -1.6769687 |
| H | -2.5817398 | -0.8377341 | -2.0805400 |
| H | -3.8353036 | 1.0073555  | 1.6065506  |
| H | -1.5273905 | 1.7889734  | 2.0006869  |

e\_pent\_sr\_oe\_4\_ts1.log

E = -1110.790716  
H = -1110.466098  
G = -1110.535082

NImag=1

|   |            |            |            |
|---|------------|------------|------------|
| C | -2.6302595 | -0.8984029 | 1.0569531  |
| C | -1.2344885 | -0.9087436 | 1.0644781  |
| C | -3.4620423 | -1.5510059 | 0.0912415  |
| O | -4.7057468 | -1.4646862 | 0.1183890  |
| C | -2.8271272 | -2.3315899 | -1.0476885 |

|   |            |            |            |
|---|------------|------------|------------|
| C | -0.5047955 | -0.4345975 | 2.2947894  |
| C | -0.3981610 | 0.3171258  | -0.5187563 |
| S | -1.0078200 | 1.9791546  | -0.6239212 |
| C | 1.0334878  | 0.1738846  | -0.4490778 |
| C | -2.6018594 | 1.7154240  | -1.4244127 |
| C | -1.5570170 | 2.4800771  | 1.0279480  |
| C | 1.8983366  | 1.1474416  | 0.1095318  |
| C | 3.2532808  | 0.9075349  | 0.2551922  |
| C | 3.7961680  | -0.3280738 | -0.1349190 |
| C | 2.9565615  | -1.3154078 | -0.6806439 |
| C | 1.6059260  | -1.0649546 | -0.8361697 |
| C | 5.1952342  | -0.5799198 | 0.0232112  |
| N | 6.3307456  | -0.7843144 | 0.1517404  |
| H | -3.1535366 | -0.2713693 | 1.7781640  |
| H | -0.7264945 | -1.7156402 | 0.5378308  |
| H | -1.8694092 | -2.7896495 | -0.7900881 |
| H | -3.5224668 | -3.1052453 | -1.3810192 |
| H | -2.6568794 | -1.6482896 | -1.8898722 |
| H | 0.5081584  | -0.0845403 | 2.0774113  |
| H | -0.4153335 | -1.2792265 | 2.9893396  |
| H | -1.0545651 | 0.3578981  | 2.8088639  |
| H | -0.8966909 | -0.2706133 | -1.2857348 |
| H | -3.1330165 | 2.6688669  | -1.4215674 |
| H | -2.4074925 | 1.3955678  | -2.4491135 |
| H | -3.1560533 | 0.9561285  | -0.8698221 |
| H | -1.9697628 | 3.4858741  | 0.9236492  |
| H | -0.6779807 | 2.5071873  | 1.6737438  |
| H | -2.3057548 | 1.7843638  | 1.4040755  |
| H | 1.5077229  | 2.1074076  | 0.4394224  |
| H | 3.8991265  | 1.6710727  | 0.6777821  |
| H | 3.3746973  | -2.2695897 | -0.9866057 |
| H | 0.9666182  | -1.8279455 | -1.2728662 |

e\_pent\_sr\_oe\_5\_ts1.log

E = -1110.796443

H = -1110.471905

G = -1110.540730

NImag=1

|   |            |            |            |
|---|------------|------------|------------|
| C | 1.2146579  | -1.8526355 | 0.4425328  |
| C | 1.3025376  | -0.9054358 | 1.4596564  |
| C | 2.2180661  | -2.1644197 | -0.5348392 |
| O | 1.9988374  | -2.9534085 | -1.4738006 |
| C | 3.6188202  | -1.5747581 | -0.4394569 |
| C | 0.3686232  | -0.9960709 | 2.6371478  |
| C | 0.5681827  | 1.0505270  | 0.7412364  |
| S | 1.6973359  | 1.3505639  | -0.5706341 |
| C | -0.7782561 | 0.7347103  | 0.3448683  |
| C | 1.1729365  | 2.8871596  | -1.3765876 |
| C | 3.1453358  | 1.9524453  | 0.3145877  |
| C | -1.0867033 | 0.0365015  | -0.8493165 |
| C | -2.3838500 | -0.3635483 | -1.1322194 |
| C | -3.4207990 | -0.0780352 | -0.2328484 |
| C | -3.1400143 | 0.6188082  | 0.9581440  |
| C | -1.8465550 | 1.0158146  | 1.2344727  |
| C | -4.7602482 | -0.4859485 | -0.5276392 |
| N | -5.8472110 | -0.8176817 | -0.7640074 |
| H | 0.2700258  | -2.3807457 | 0.3134541  |
| H | 2.2785596  | -0.4877462 | 1.6986468  |
| H | 3.8384992  | -1.0771760 | 0.5063820  |
| H | 4.3361994  | -2.3890573 | -0.5775727 |
| H | 3.7741056  | -0.8650354 | -1.2594280 |

|   |            |            |            |
|---|------------|------------|------------|
| H | 0.3186744  | -0.0616600 | 3.2023816  |
| H | 0.7296719  | -1.7810555 | 3.3131070  |
| H | -0.6425940 | -1.2712200 | 2.3205290  |
| H | 0.6891025  | 1.7768701  | 1.5453512  |
| H | 1.9355118  | 3.1604420  | -2.1094259 |
| H | 0.2276405  | 2.6820546  | -1.8826525 |
| H | 1.0501855  | 3.6666887  | -0.6225280 |
| H | 3.8890560  | 2.2387988  | -0.4309059 |
| H | 3.5331655  | 1.1442250  | 0.9341621  |
| H | 2.8577694  | 2.8088961  | 0.9278181  |
| H | -0.3054279 | -0.1964805 | -1.5675195 |
| H | -2.5998468 | -0.8985574 | -2.0520435 |
| H | -3.9435496 | 0.8468666  | 1.6516478  |
| H | -1.6367493 | 1.5551725  | 2.1541394  |

e\_pent\_sr\_oz\_1\_ts1.log

E = -1110.801483

H = -1110.477189

G = -1110.546201

NImag=1

|   |            |            |            |
|---|------------|------------|------------|
| C | 0.5393130  | -1.8995689 | 0.9943846  |
| C | 1.2976904  | -0.9223747 | 1.6186991  |
| C | 0.9269314  | -2.3942586 | -0.2917923 |
| O | 1.9409067  | -1.9813470 | -0.8932247 |
| C | 0.0515935  | -3.4301319 | -0.9690259 |
| C | 0.9268150  | -0.4165145 | 2.9843967  |
| C | 1.0023073  | 1.0134325  | 0.4913866  |
| S | 2.0841085  | 1.0958083  | -0.8879313 |
| C | -0.3938373 | 0.8905021  | 0.1816127  |
| C | 2.4291703  | 2.8688474  | -1.0601812 |
| C | 3.6994438  | 0.5660324  | -0.2882185 |
| C | -1.3552160 | 1.4124855  | 1.0843674  |
| C | -2.7077692 | 1.1884506  | 0.9091888  |
| C | -3.1581273 | 0.4304825  | -0.1882044 |
| C | -2.2270624 | -0.1043621 | -1.0912822 |
| C | -0.8714135 | 0.1105776  | -0.9016581 |
| C | -4.5574175 | 0.2037460  | -0.3795571 |
| N | -5.6933543 | 0.0202201  | -0.5338045 |
| H | -0.4418191 | -2.1631510 | 1.3836869  |
| H | 2.3493597  | -0.8666827 | 1.3552035  |
| H | -0.8358100 | -3.6784292 | -0.3819167 |
| H | -0.2587169 | -3.0565919 | -1.9506943 |
| H | 0.6352667  | -4.3418630 | -1.1359200 |
| H | 1.4789362  | 0.4868491  | 3.2535463  |
| H | 1.1574501  | -1.1851771 | 3.7324003  |
| H | -0.1467570 | -0.2080923 | 3.0498048  |
| H | 1.2857437  | 1.7309773  | 1.2608403  |
| H | 3.1683799  | 3.0024774  | -1.8534030 |
| H | 1.4914198  | 3.3544437  | -1.3355781 |
| H | 2.8016870  | 3.2589720  | -0.1104932 |
| H | 4.4383622  | 0.9246976  | -1.0077229 |
| H | 3.6901708  | -0.5228020 | -0.2645701 |
| H | 3.8838738  | 0.9986662  | 0.6976509  |
| H | -1.0164827 | 2.0085861  | 1.9274966  |
| H | -3.4268644 | 1.6036967  | 1.6087567  |
| H | -2.5717989 | -0.6987277 | -1.9324122 |
| H | -0.1677072 | -0.3239251 | -1.6057634 |

e\_pent\_sr\_oz\_2\_ts1.log

E = -1110.796298



H = -1110.471929  
G = -1110.542684  
NImag=1

|   |            |            |            |
|---|------------|------------|------------|
| C | -2.6235910 | -1.1923042 | 0.7563365  |
| C | -1.3060279 | -0.9402884 | 1.1083608  |
| C | -2.9159512 | -1.8530912 | -0.4826969 |
| O | -2.0366293 | -2.1679742 | -1.3085994 |
| C | -4.3652518 | -2.1607688 | -0.8098937 |
| C | -0.9339873 | -0.4183570 | 2.4672933  |
| C | -0.4566688 | 0.6126898  | -0.2286164 |
| S | -0.8696316 | 2.1949271  | 0.3764976  |
| C | 0.9388779  | 0.2684232  | -0.2668613 |
| C | -0.6792830 | 3.3502001  | -1.0117128 |
| C | -2.6674048 | 2.1481813  | 0.4700817  |
| C | 1.9536502  | 0.9017967  | 0.4946806  |
| C | 3.2602342  | 0.4458646  | 0.4699390  |
| C | 3.6074289  | -0.6675015 | -0.3133955 |
| C | 2.6159131  | -1.3217760 | -1.0664511 |
| C | 1.3121953  | -0.8647188 | -1.0382844 |
| C | 4.9585646  | -1.1347094 | -0.3412338 |
| N | 6.0553898  | -1.5149564 | -0.3639096 |
| H | -3.4435419 | -0.8034976 | 1.3551974  |
| H | -0.5602491 | -1.5658848 | 0.6197054  |
| H | -5.0492007 | -1.8702296 | -0.0090644 |
| H | -4.6474740 | -1.6353021 | -1.7285915 |
| H | -4.4719695 | -3.2334573 | -1.0010866 |
| H | 0.0690767  | 0.0200297  | 2.4762615  |
| H | -0.9330500 | -1.2488143 | 3.1841770  |
| H | -1.6530195 | 0.3239986  | 2.8293569  |
| H | -1.0639841 | 0.3148041  | -1.0814651 |
| H | -1.0190958 | 4.3363447  | -0.6864869 |
| H | 0.3829436  | 3.3819326  | -1.2607861 |
| H | -1.2662807 | 2.9873826  | -1.8578471 |
| H | -3.0040191 | 3.1809870  | 0.5767401  |
| H | -2.9548759 | 1.5694750  | 1.3468073  |
| H | -3.0670427 | 1.7015410  | -0.4430608 |
| H | 1.7219786  | 1.7672567  | 1.1096664  |
| H | 4.0226288  | 0.9511058  | 1.0550680  |
| H | 2.8792227  | -2.1866308 | -1.6679492 |
| H | 0.5424163  | -1.3790161 | -1.6087578 |

e\_pent\_sr\_oz\_3\_ts1.log

E = -1110.788832  
H = -1110.464026  
G = -1110.532474  
NImag=1

|   |            |            |            |
|---|------------|------------|------------|
| C | 0.6465659  | -1.6077958 | 1.2654660  |
| C | 1.4005196  | -0.5583930 | 1.7537641  |
| C | 1.0136796  | -2.2841325 | 0.0546801  |
| O | 2.0209048  | -1.9827667 | -0.6191491 |
| C | 0.1205184  | -3.4027397 | -0.4442688 |
| C | 1.0612635  | 0.0951183  | 3.0639959  |
| C | 0.9623723  | 1.3039076  | 0.4591692  |
| S | 2.1956934  | 1.7043795  | -0.7602077 |
| C | -0.3996981 | 1.0070582  | 0.1137032  |
| C | 3.6953289  | 0.7935658  | -0.3230458 |
| C | 1.8359649  | 0.8935903  | -2.3271128 |
| C | -1.4253556 | 1.5695757  | 0.9225861  |
| C | -2.7516087 | 1.2129473  | 0.7774916  |
| C | -3.1215920 | 0.2716119  | -0.2021483 |
| C | -2.1318022 | -0.3149614 | -1.0023924 |

|   |            |            |            |
|---|------------|------------|------------|
| C | -0.7987200 | 0.0279584  | -0.8324338 |
| C | -4.4944747 | -0.0926741 | -0.3709876 |
| N | -5.6092191 | -0.3869741 | -0.5074585 |
| H | -0.3219449 | -1.8335917 | 1.7073350  |
| H | 2.4336489  | -0.4976428 | 1.4300081  |
| H | -0.7926980 | -3.5077970 | 0.1461533  |
| H | -0.1425582 | -3.2175925 | -1.4909016 |
| H | 0.6760679  | -4.3465017 | -0.4092337 |
| H | 1.6425511  | 1.0045813  | 3.2313356  |
| H | 1.2742313  | -0.5968190 | 3.8883645  |
| H | -0.0050372 | 0.3444211  | 3.1147843  |
| H | 1.0610157  | 2.1009088  | 1.1964230  |
| H | 4.4640026  | 1.1077299  | -1.0328409 |
| H | 3.9850963  | 1.0920621  | 0.6862089  |
| H | 3.4915936  | -0.2771925 | -0.3909483 |
| H | 2.6396522  | 1.2029032  | -2.9990524 |
| H | 0.8823934  | 1.2611552  | -2.7066414 |
| H | 1.8433938  | -0.1903365 | -2.1927270 |
| H | -1.1549851 | 2.3102620  | 1.6703424  |
| H | -3.5120995 | 1.6669319  | 1.4054990  |
| H | -2.4084289 | -1.0599193 | -1.7427730 |
| H | -0.0622477 | -0.4798441 | -1.4404431 |

e\_pent\_sr\_oz\_4\_ts1.log

E = -1110.792300

H = -1110.467524

G = -1110.536466

NImag=1

|   |            |            |            |
|---|------------|------------|------------|
| C | 1.9988106  | -1.7495960 | 0.1345005  |
| C | 1.4880471  | -1.2093583 | 1.3054966  |
| C | 3.2720939  | -1.3226705 | -0.3745930 |
| O | 3.9456098  | -0.4128203 | 0.1440427  |
| C | 3.7865346  | -1.9773566 | -1.6412675 |
| C | 0.3852251  | -1.9082072 | 2.0478207  |
| C | 0.3674963  | 0.7268993  | 1.0406843  |
| S | 1.4642205  | 1.8470686  | 0.2638912  |
| C | -0.9503574 | 0.4451676  | 0.5242785  |
| C | 1.8482389  | 1.2887236  | -1.4214883 |
| C | 0.5128096  | 3.3398087  | -0.1422731 |
| C | -1.2397292 | 0.2423608  | -0.8472436 |
| C | -2.5083993 | -0.1240947 | -1.2706694 |
| C | -3.5378280 | -0.3122959 | -0.3377638 |
| C | -3.2767931 | -0.1229994 | 1.0316627  |
| C | -2.0126008 | 0.2496252  | 1.4451707  |
| C | -4.8455372 | -0.6940621 | -0.7764392 |
| N | -5.9061711 | -1.0040124 | -1.1315259 |
| H | 1.4329577  | -2.4971482 | -0.4169772 |
| H | 2.1887818  | -0.6379134 | 1.9113349  |
| H | 3.2545156  | -2.8994018 | -1.8870467 |
| H | 3.6600223  | -1.2710081 | -2.4718934 |
| H | 4.8562835  | -2.1821969 | -1.5442005 |
| H | -0.0709558 | -1.2761236 | 2.8130506  |
| H | 0.8084848  | -2.7871504 | 2.5497164  |
| H | -0.3976171 | -2.2593535 | 1.3673318  |
| H | 0.4163860  | 0.9456212  | 2.1056102  |
| H | 2.8827087  | 1.5708667  | -1.6199215 |
| H | 1.7408495  | 0.2060065  | -1.4632457 |
| H | 1.1716860  | 1.7733070  | -2.1267222 |
| H | 1.1677506  | 4.0066259  | -0.7087559 |
| H | 0.2244449  | 3.8061467  | 0.8010919  |
| H | -0.3676114 | 3.0711053  | -0.7293916 |

|   |            |            |            |
|---|------------|------------|------------|
| H | -0.4690998 | 0.3627491  | -1.5987082 |
| H | -2.7053117 | -0.2727219 | -2.3280238 |
| H | -4.0726618 | -0.2602876 | 1.7572203  |
| H | -1.8237171 | 0.4057675  | 2.5036286  |

e\_pent\_sr\_oz\_5\_ts1.log

E = -1110.792847  
H = -1110.468019  
G = -1110.538800

NImag=1

|   |            |            |            |
|---|------------|------------|------------|
| C | -2.7900737 | -0.9990891 | 0.8766762  |
| C | -1.4081592 | -1.1647918 | 0.9349997  |
| C | -3.5149154 | -1.3945890 | -0.2929779 |
| O | -2.9678040 | -1.8877668 | -1.3000722 |
| C | -5.0149821 | -1.1666985 | -0.3196643 |
| C | -0.6516395 | -0.9333250 | 2.2125015  |
| C | -0.4845439 | 0.1936352  | -0.5152493 |
| S | -1.3832745 | 1.6827633  | -0.3897331 |
| C | 0.9436139  | 0.0764900  | -0.4038563 |
| C | -1.3566291 | 2.2667160  | 1.3215517  |
| C | -0.4732403 | 3.0054063  | -1.2279088 |
| C | 1.7993993  | 0.9645226  | 0.2945215  |
| C | 3.1529790  | 0.7060286  | 0.4289315  |
| C | 3.7106879  | -0.4594458 | -0.1199145 |
| C | 2.8832673  | -1.3626257 | -0.8110528 |
| C | 1.5352697  | -1.0945720 | -0.9500007 |
| C | 5.1086357  | -0.7248307 | 0.0228716  |
| N | 6.2433743  | -0.9406832 | 0.1394218  |
| H | -3.3083544 | -0.4520931 | 1.6609691  |
| H | -0.9874775 | -1.9284767 | 0.2823067  |
| H | -5.4089722 | -0.8391297 | 0.6453542  |
| H | -5.2470472 | -0.4043736 | -1.0719956 |
| H | -5.5186097 | -2.0898160 | -0.6225303 |
| H | 0.3894317  | -0.6476369 | 2.0351298  |
| H | -0.6353517 | -1.8727624 | 2.7792920  |
| H | -1.1283349 | -0.1760622 | 2.8403452  |
| H | -0.9529612 | -0.3835451 | -1.3098754 |
| H | -1.7302155 | 3.2927428  | 1.2989742  |
| H | -2.0476798 | 1.6391343  | 1.8839270  |
| H | -0.3572648 | 2.2332781  | 1.7520474  |
| H | -1.0857890 | 3.9072968  | -1.1662210 |
| H | -0.3627236 | 2.6996104  | -2.2696438 |
| H | 0.5012569  | 3.1699233  | -0.7689238 |
| H | 1.4111879  | 1.8700394  | 0.7460676  |
| H | 3.7869093  | 1.4059366  | 0.9647342  |
| H | 3.3084798  | -2.2648317 | -1.2400743 |
| H | 0.9066327  | -1.7941025 | -1.4946549 |

e\_pent\_ss\_oe\_1\_ts1.log

E = -1110.786641  
H = -1110.462317  
G = -1110.531790

NImag=1

|   |           |            |            |
|---|-----------|------------|------------|
| C | 2.5675072 | -1.0608548 | -0.7262451 |
| C | 1.3863902 | -0.7843627 | -1.4105694 |
| C | 2.6219988 | -1.7772501 | 0.5093333  |
| O | 3.6760581 | -1.9080258 | 1.1616726  |
| C | 1.3404758 | -2.3835431 | 1.0628810  |
| C | 1.4659826 | -0.3534808 | -2.8566677 |
| C | 0.2856539 | 0.9448237  | -0.6826647 |

|   |            |            |            |
|---|------------|------------|------------|
| S | 1.1479281  | 2.0707072  | 0.3916619  |
| C | -0.9975237 | 0.4828920  | -0.2011750 |
| C | 2.1632206  | 1.1416824  | 1.5879074  |
| C | 2.4366300  | 2.6624975  | -0.7206503 |
| C | -1.9046693 | -0.0619997 | -1.1460415 |
| C | -3.1129782 | -0.6084778 | -0.7570826 |
| C | -3.4682528 | -0.6302041 | 0.6035334  |
| C | -2.5883645 | -0.0969840 | 1.5585553  |
| C | -1.3758093 | 0.4418800  | 1.1627445  |
| H | 0.5140304  | -1.3905190 | -1.1683849 |
| C | -4.7193727 | -1.1906108 | 1.0120129  |
| N | -5.7350376 | -1.6450774 | 1.3426799  |
| H | 3.5009511  | -0.6148331 | -1.0697525 |
| H | 0.5528142  | -1.6276804 | 1.1583714  |
| H | 0.9590702  | -3.1671204 | 0.3987351  |
| H | 1.5441075  | -2.8160807 | 2.0441113  |
| H | 0.5004405  | -0.0275671 | -3.2507188 |
| H | 1.8028733  | -1.2053096 | -3.4596672 |
| H | 2.1906291  | 0.4564159  | -2.9891887 |
| H | 0.2623350  | 1.4301543  | -1.6563364 |
| H | 2.4514970  | 1.8758212  | 2.3427682  |
| H | 1.5437041  | 0.3678355  | 2.0438173  |
| H | 3.0378974  | 0.7097565  | 1.1067193  |
| H | 3.1141241  | 3.2849349  | -0.1336888 |
| H | 1.9583159  | 3.2588639  | -1.4990079 |
| H | 2.9606081  | 1.8034372  | -1.1431879 |
| H | -1.6421103 | -0.0424725 | -2.2005145 |
| H | -3.7930038 | -1.0160285 | -1.4988750 |
| H | -2.8613302 | -0.1084763 | 2.6092957  |
| H | -0.7198327 | 0.8379976  | 1.9337044  |

e\_pent\_ss\_oe\_2\_ts1.log

E = -1110.795386

H = -1110.470904

G = -1110.541174

NImag=1

|   |            |            |            |
|---|------------|------------|------------|
| C | -2.5300947 | -1.2751955 | 0.7713745  |
| C | -1.2832552 | -0.9761536 | 1.3206275  |
| C | -2.7764819 | -1.8658301 | -0.5115542 |
| O | -3.9322829 | -2.0797076 | -0.9268988 |
| C | -1.6239327 | -2.2597622 | -1.4222814 |
| C | -1.1747135 | -0.7005711 | 2.7983196  |
| C | -0.4458184 | 0.9513202  | 0.6789444  |
| S | -1.5229418 | 1.3426127  | -0.6529158 |
| C | 0.9126700  | 0.6149248  | 0.3461571  |
| C | -2.9323634 | 2.0107826  | 0.2452919  |
| C | -0.8873409 | 2.8629885  | -1.4058697 |
| C | 1.9169551  | 0.7534238  | 1.3376479  |
| C | 3.2165692  | 0.3399301  | 1.1119624  |
| C | 3.5695578  | -0.2280066 | -0.1253481 |
| C | 2.5936774  | -0.3754203 | -1.1241579 |
| C | 1.2920658  | 0.0327754  | -0.8898809 |
| H | -0.4093643 | -1.4522596 | 0.8801831  |
| C | 4.9146580  | -0.6505092 | -0.3664844 |
| N | 6.0063689  | -0.9936738 | -0.5614095 |
| H | -3.4241305 | -0.9966004 | 1.3294515  |
| H | -0.6444158 | -2.2579618 | -0.9412028 |
| H | -1.8258988 | -3.2575258 | -1.8225221 |
| H | -1.5914486 | -1.5667723 | -2.2704430 |
| H | -0.2047757 | -0.2734518 | 3.0665466  |
| H | -1.2910319 | -1.6420499 | 3.3495829  |

|   |            |            |            |
|---|------------|------------|------------|
| H | -1.9646574 | -0.0189297 | 3.1296105  |
| H | -0.5933700 | 1.6310794  | 1.5172569  |
| H | -3.6684601 | 2.3388554  | -0.4902055 |
| H | -3.3419263 | 1.2076345  | 0.8572001  |
| H | -2.5937815 | 2.8463274  | 0.8613772  |
| H | -1.6140140 | 3.1959305  | -2.1506482 |
| H | 0.0576346  | 2.6179631  | -1.8946070 |
| H | -0.7406001 | 3.6176388  | -0.6314375 |
| H | 1.6572713  | 1.2043675  | 2.2913751  |
| H | 3.9699053  | 0.4599680  | 1.8846450  |
| H | 2.8624265  | -0.8139792 | -2.0803147 |
| H | 0.5578784  | -0.1044131 | -1.6803857 |

e\_pent\_ss\_oe\_3\_ts1.log

E = -1110.795054

H = -1110.470158

G = -1110.538157

NImag=1

|   |            |            |            |
|---|------------|------------|------------|
| C | -1.1511828 | -2.1642412 | -0.2650035 |
| C | -1.6393844 | -1.5282718 | 0.8751558  |
| C | 0.1862344  | -2.6315744 | -0.4895346 |
| O | 0.5181436  | -3.1777078 | -1.5611726 |
| C | 1.2484206  | -2.5327286 | 0.5929345  |
| C | -3.1250898 | -1.5373190 | 1.1502982  |
| C | -1.2955462 | 0.6120912  | 0.9038712  |
| S | -2.5523678 | 1.4257614  | -0.0067684 |
| C | 0.1027246  | 0.7591795  | 0.5676221  |
| C | -1.9496056 | 3.0678690  | -0.4828048 |
| C | -2.7201508 | 0.6866933  | -1.6544617 |
| C | 0.5939445  | 0.6509016  | -0.7522285 |
| C | 1.9555354  | 0.6878044  | -1.0171415 |
| C | 2.8701973  | 0.8119719  | 0.0369405  |
| C | 2.4070252  | 0.9000868  | 1.3621482  |
| C | 1.0480690  | 0.8740457  | 1.6144008  |
| H | -1.0235572 | -1.5533139 | 1.7715269  |
| C | 4.2769007  | 0.8420724  | -0.2350975 |
| N | 5.4159833  | 0.8667354  | -0.4535397 |
| H | -1.8315789 | -2.3264680 | -1.1012333 |
| H | 0.8916871  | -2.1480679 | 1.5489148  |
| H | 1.6714686  | -3.5307841 | 0.7457730  |
| H | 2.0578499  | -1.8856214 | 0.2368384  |
| H | -3.4122235 | -0.8038709 | 1.9085386  |
| H | -3.4098475 | -2.5295013 | 1.5213594  |
| H | -3.7078165 | -1.3559187 | 0.2404255  |
| H | -1.5389678 | 0.7762705  | 1.9527407  |
| H | -2.7088926 | 3.5229479  | -1.1233543 |
| H | -1.8297315 | 3.6478848  | 0.4332611  |
| H | -1.0004229 | 2.9754643  | -1.0138925 |
| H | -3.7321799 | 0.9160605  | -1.9926669 |
| H | -2.5881132 | -0.3910793 | -1.5685439 |
| H | -1.9897287 | 1.1139963  | -2.3421332 |
| H | -0.0890789 | 0.5276150  | -1.5851722 |
| H | 2.3156133  | 0.6054369  | -2.0380335 |
| H | 3.1172321  | 0.9944092  | 2.1777911  |
| H | 0.6931528  | 0.9464592  | 2.6390068  |

e\_pent\_ss\_oe\_4\_ts1.log

E = -1110.789144

H = -1110.463924

G = -1110.532308

NImag=1

|   |            |            |            |
|---|------------|------------|------------|
| C | 2.7774397  | -1.6131670 | -0.1956668 |
| C | 1.5689550  | -1.4654759 | 0.4841157  |
| C | 3.9959724  | -0.9005463 | 0.0430881  |
| O | 5.0066134  | -1.0646926 | -0.6689090 |
| C | 4.1167527  | 0.0775848  | 1.2016357  |
| C | 0.5412460  | -2.5643020 | 0.4118527  |
| C | 0.3602512  | 0.0176330  | -0.5946334 |
| S | 1.3342519  | 1.4683819  | -0.4598486 |
| C | -1.0719058 | 0.0209915  | -0.3621725 |
| C | 0.4620072  | 2.8219985  | -1.2896778 |
| C | 1.2839928  | 2.0853658  | 1.2453360  |
| C | -1.7129925 | 0.7008555  | 0.6996132  |
| C | -3.0752931 | 0.5737659  | 0.9196758  |
| C | -3.8503469 | -0.2481502 | 0.0881116  |
| C | -3.2380553 | -0.9400317 | -0.9708502 |
| C | -1.8799770 | -0.7997875 | -1.1886596 |
| H | 1.5651118  | -0.9151507 | 1.4230931  |
| C | -5.2571078 | -0.3820988 | 0.3181540  |
| N | -6.3973035 | -0.4912975 | 0.5041905  |
| H | 2.8027937  | -2.2944652 | -1.0467681 |
| H | 3.2944167  | 0.0391176  | 1.9175521  |
| H | 5.0509393  | -0.1331635 | 1.7303798  |
| H | 4.1938621  | 1.0958178  | 0.8036158  |
| H | -0.4225616 | -2.2591197 | 0.8247364  |
| H | 0.9020822  | -3.4193030 | 0.9966435  |
| H | 0.3932686  | -2.9050496 | -0.6183286 |
| H | 0.6546889  | -0.4403978 | -1.5373203 |
| H | 1.0289131  | 3.7393353  | -1.1147477 |
| H | 0.4414561  | 2.5883197  | -2.3551508 |
| H | -0.5499760 | 2.9089723  | -0.8891425 |
| H | 2.1932063  | 2.6716609  | 1.3913470  |
| H | 1.2745975  | 1.2370960  | 1.9298230  |
| H | 0.4071411  | 2.7160733  | 1.3930739  |
| H | -1.1434372 | 1.3220875  | 1.3800305  |
| H | -3.5447880 | 1.1049873  | 1.7417847  |
| H | -3.8350394 | -1.5739859 | -1.6192145 |
| H | -1.4164085 | -1.3308207 | -2.0153398 |

e\_pent\_ss\_oe\_6\_ts1.log

E = -1110.786268  
H = -1110.461746  
G = -1110.531902

NImag=1

|   |            |            |            |
|---|------------|------------|------------|
| C | 2.2731989  | 1.2876974  | 0.9185581  |
| C | 1.3733630  | 0.4588840  | 1.5813502  |
| C | 1.9304189  | 2.3238747  | -0.0042090 |
| O | 2.7990272  | 2.9345587  | -0.6589515 |
| C | 0.4786785  | 2.7033741  | -0.2523725 |
| C | 1.8636209  | -0.3640801 | 2.7491077  |
| C | 0.6022699  | -1.1974397 | 0.3724899  |
| S | 1.5229192  | -1.6693533 | -1.0719977 |
| C | -0.7903958 | -0.8911739 | 0.1512022  |
| C | 2.2007327  | -0.1938787 | -1.9025947 |
| C | 3.0287247  | -2.3107717 | -0.3184063 |
| C | -1.6662123 | -0.9193998 | 1.2677975  |
| C | -2.9853054 | -0.5225845 | 1.1625986  |
| C | -3.4897782 | -0.0815805 | -0.0746051 |
| C | -2.6456113 | -0.0487552 | -1.1954490 |
| C | -1.3219863 | -0.4398259 | -1.0812197 |
| H | 0.3429299  | 0.7946971  | 1.6749991  |

|   |            |            |            |
|---|------------|------------|------------|
| C | -4.8552491 | 0.3283252  | -0.1896056 |
| N | -5.9636954 | 0.6606437  | -0.2816531 |
| H | 3.3378840  | 1.0619775  | 0.9902381  |
| H | -0.2433977 | 2.2101551  | 0.4008631  |
| H | 0.3799497  | 3.7875221  | -0.1390241 |
| H | 0.2284659  | 2.4622653  | -1.2916608 |
| H | 1.1190474  | -1.0859770 | 3.0927761  |
| H | 2.0831509  | 0.3114135  | 3.5850354  |
| H | 2.7859570  | -0.8990468 | 2.5032074  |
| H | 0.8056796  | -1.9546154 | 1.1264598  |
| H | 2.5682602  | -0.5610201 | -2.8629117 |
| H | 1.3916548  | 0.5191513  | -2.0652133 |
| H | 3.0024014  | 0.2522502  | -1.3187149 |
| H | 3.7255523  | -2.5387054 | -1.1267374 |
| H | 2.7711574  | -3.2217636 | 0.2238111  |
| H | 3.4410294  | -1.5537744 | 0.3509350  |
| H | -1.2863355 | -1.2632861 | 2.2264707  |
| H | -3.6368784 | -0.5533416 | 2.0305696  |
| H | -3.0327034 | 0.2870921  | -2.1526019 |
| H | -0.6998000 | -0.3920774 | -1.9711431 |

e\_pent\_ss\_oe\_8\_ts1.log

E = -1110.795453

H = -1110.471026

G = -1110.539325

NImag=1

|   |            |            |            |
|---|------------|------------|------------|
| C | 0.9452149  | 2.1719454  | -0.2739884 |
| C | 1.3597087  | 1.5538786  | 0.9028086  |
| C | -0.3951344 | 2.5576848  | -0.6159973 |
| O | -0.6637501 | 3.1091015  | -1.7015487 |
| C | -1.5201963 | 2.4147634  | 0.3978993  |
| C | 2.7807236  | 1.7470278  | 1.3728695  |
| C | 1.3230730  | -0.6291486 | 0.6944679  |
| S | 2.4011976  | -0.9324321 | -0.6716363 |
| C | -0.0782217 | -0.8289185 | 0.4474128  |
| C | 3.9930096  | -1.1955328 | 0.1368633  |
| C | 2.0890973  | -2.6393981 | -1.2057729 |
| C | -0.9303477 | -1.1233903 | 1.5426879  |
| C | -2.3014783 | -1.1765269 | 1.3947148  |
| C | -2.8796248 | -0.9392418 | 0.1317907  |
| C | -2.0587064 | -0.6590970 | -0.9686967 |
| C | -0.6817090 | -0.6044921 | -0.8137257 |
| H | 0.6345936  | 1.4481005  | 1.7081971  |
| C | -4.3009838 | -0.9901358 | -0.0279671 |
| N | -5.4540286 | -1.0298504 | -0.1553108 |
| H | 1.6987431  | 2.4103987  | -1.0253947 |
| H | -1.3789214 | 1.5967769  | 1.1064801  |
| H | -1.5972541 | 3.3506093  | 0.9648678  |
| H | -2.4623046 | 2.2692631  | -0.1365067 |
| H | 3.1024910  | 0.9755986  | 2.0771768  |
| H | 2.8498930  | 2.7155149  | 1.8839187  |
| H | 3.4777522  | 1.7825752  | 0.5285387  |
| H | 1.7237918  | -1.0566374 | 1.6133887  |
| H | 4.6643265  | -1.6092978 | -0.6177065 |
| H | 4.3775048  | -0.2400586 | 0.4872238  |
| H | 3.8606021  | -1.8955604 | 0.9639914  |
| H | 2.8206616  | -2.8844694 | -1.9788969 |
| H | 1.0817070  | -2.6810640 | -1.6224587 |
| H | 2.1821128  | -3.3042594 | -0.3450413 |
| H | -0.4885880 | -1.3029291 | 2.5192163  |
| H | -2.9373237 | -1.4027434 | 2.2451546  |

|   |            |            |            |
|---|------------|------------|------------|
| H | -2.5048476 | -0.4763538 | -1.9418278 |
| H | -0.0735436 | -0.3826209 | -1.6865144 |

e\_pent\_ss\_oe\_9\_ts1.log

E = -1110.797873  
H = -1110.473538  
G = -1110.543228

NImag=1

|   |            |            |            |
|---|------------|------------|------------|
| C | -0.6109141 | 2.2068221  | 0.8534074  |
| C | -1.1402632 | 2.4655704  | 2.1168809  |
| C | -0.6714150 | 3.1186241  | -0.2502971 |
| O | -0.2176084 | 2.8429265  | -1.3771046 |
| C | -1.3099050 | 4.4848477  | -0.0381385 |
| C | -0.7100511 | 1.6027196  | 3.2753823  |
| C | -3.2439240 | 2.0227211  | 2.0817375  |
| S | -4.0002207 | 2.3118564  | 3.6403800  |
| C | -3.2956084 | 0.6623857  | 1.5972564  |
| C | -3.4295409 | 3.9674030  | 4.0690061  |
| C | -5.7430903 | 2.6775302  | 3.2995451  |
| C | -3.1739623 | 0.4567296  | 0.2018596  |
| C | -3.0720912 | -0.8166344 | -0.3349161 |
| C | -3.0944424 | -1.9350902 | 0.5112106  |
| C | -3.2150457 | -1.7570018 | 1.9007714  |
| C | -3.3075416 | -0.4824892 | 2.4307177  |
| H | -1.3536936 | 3.5044847  | 2.3608949  |
| C | -2.9978093 | -3.2539689 | -0.0372986 |
| N | -2.9183236 | -4.3233809 | -0.4810324 |
| H | -0.1912138 | 1.2235259  | 0.6440763  |
| H | -2.3621180 | 4.3871591  | 0.2522576  |
| H | -0.8029396 | 5.0429147  | 0.7558488  |
| H | -1.2507614 | 5.0538052  | -0.9676140 |
| H | -1.3095749 | 1.7615856  | 4.1773948  |
| H | 0.3315992  | 1.8310104  | 3.5306561  |
| H | -0.7594748 | 0.5411100  | 3.0102661  |
| H | -3.5441780 | 2.7899529  | 1.3678744  |
| H | -4.0530439 | 4.3207577  | 4.8922242  |
| H | -2.3913148 | 3.9016125  | 4.3963507  |
| H | -3.5297658 | 4.6215443  | 3.1999286  |
| H | -6.2226110 | 2.9635382  | 4.2383072  |
| H | -6.1929079 | 1.7623911  | 2.9106621  |
| H | -5.8009606 | 3.4833126  | 2.5648492  |
| H | -3.1765708 | 1.3175886  | -0.4603174 |
| H | -2.9822145 | -0.9525824 | -1.4083707 |
| H | -3.2307412 | -2.6225918 | 2.5557525  |
| H | -3.3857469 | -0.3744100 | 3.5090152  |

e\_pent\_ss\_oz\_10\_ts1.log

E = -1110.794199  
H = -1110.469833  
G = -1110.540323

NImag=1

|   |            |            |            |
|---|------------|------------|------------|
| C | 1.4870806  | -1.8462295 | 0.9422190  |
| C | 1.3935781  | -0.5290108 | 1.3581064  |
| C | 2.5257031  | -2.2376407 | 0.0307150  |
| O | 3.3562853  | -1.4312631 | -0.4311036 |
| C | 2.5710476  | -3.6813623 | -0.4289957 |
| C | 0.3889123  | -0.1161336 | 2.3927671  |
| C | 0.6840780  | 0.5879187  | -0.4507544 |
| S | 1.2530334  | 2.2549137  | -0.6214016 |
| C | -0.7292278 | 0.3693606  | -0.4563633 |



|   |            |            |            |
|---|------------|------------|------------|
| C | 1.6854213  | 2.8872627  | 1.0223396  |
| C | 2.9039123  | 1.9474523  | -1.2777977 |
| C | -1.6700817 | 1.3129304  | 0.0330457  |
| C | -3.0150358 | 1.0076487  | 0.1247059  |
| C | -3.4770488 | -0.2669703 | -0.2510699 |
| C | -2.5642430 | -1.2217947 | -0.7336589 |
| C | -1.2227739 | -0.9054778 | -0.8443837 |
| H | 2.3042839  | 0.0614088  | 1.2848850  |
| C | -4.8662833 | -0.5863326 | -0.1490913 |
| N | -5.9952162 | -0.8455484 | -0.0650068 |
| H | 0.7075797  | -2.5609849 | 1.1947853  |
| H | 3.6049298  | -4.0378787 | -0.4217674 |
| H | 1.9525739  | -4.3364381 | 0.1891214  |
| H | 2.2096838  | -3.7362013 | -1.4626681 |
| H | 0.1800337  | 0.9559534  | 2.3716435  |
| H | 0.7767513  | -0.3591557 | 3.3900419  |
| H | -0.5552851 | -0.6554419 | 2.2601580  |
| H | 1.3109742  | -0.0530026 | -1.0642648 |
| H | 2.1746760  | 3.8505515  | 0.8609316  |
| H | 0.7587141  | 3.0403129  | 1.5769613  |
| H | 2.3507403  | 2.1976223  | 1.5420185  |
| H | 3.4725537  | 2.8754242  | -1.2037936 |
| H | 2.7904926  | 1.6558118  | -2.3230962 |
| H | 3.3643005  | 1.1405726  | -0.7012461 |
| H | -1.3404561 | 2.2975845  | 0.3578120  |
| H | -3.7178221 | 1.7469265  | 0.4968708  |
| H | -2.9208201 | -2.2024250 | -1.0345879 |
| H | -0.5296994 | -1.6377478 | -1.2480794 |

e\_pent\_ss\_oz\_1\_ts1.log

E = -1110.792437

H = -1110.467856

G = -1110.538884

NImag=1

|   |            |            |            |
|---|------------|------------|------------|
| C | 2.7891833  | -1.5977947 | -0.2124990 |
| C | 1.5186246  | -1.5850694 | 0.3405803  |
| C | 3.8352319  | -0.7526453 | 0.2904537  |
| O | 3.6728912  | 0.0590885  | 1.2211133  |
| C | 5.2023061  | -0.8476221 | -0.3596820 |
| C | 0.5347471  | -2.6787847 | 0.0392372  |
| C | 0.3393705  | 0.0670604  | -0.6719390 |
| S | 1.3495071  | 1.4685995  | -0.4014817 |
| C | -1.0800563 | 0.0530607  | -0.4124503 |
| C | 0.4765436  | 2.9147586  | -1.0644380 |
| C | 1.3478795  | 1.9200439  | 1.3534235  |
| C | -1.6984036 | 0.6550981  | 0.7108583  |
| C | -3.0568414 | 0.5205219  | 0.9465656  |
| C | -3.8553812 | -0.2319843 | 0.0717051  |
| C | -3.2661767 | -0.8493891 | -1.0463548 |
| C | -1.9123248 | -0.7036477 | -1.2792580 |
| H | 1.4079584  | -1.0968273 | 1.3076525  |
| C | -5.2578792 | -0.3718628 | 0.3167595  |
| N | -6.3959897 | -0.4858578 | 0.5147455  |
| H | 2.9940334  | -2.2234007 | -1.0784066 |
| H | 5.9671531  | -0.9583314 | 0.4148509  |
| H | 5.2780090  | -1.6763225 | -1.0672864 |
| H | 5.4066035  | 0.0888310  | -0.8911558 |
| H | -0.4789497 | -2.4246650 | 0.3554310  |
| H | 0.8359415  | -3.5816273 | 0.5852104  |
| H | 0.5239044  | -2.9245881 | -1.0276876 |
| H | 0.6369561  | -0.3419640 | -1.6346451 |

|   |            |            |            |
|---|------------|------------|------------|
| H | 1.0606864  | 3.8025067  | -0.8102028 |
| H | 0.4263842  | 2.7948662  | -2.1476563 |
| H | -0.5248220 | 2.9764279  | -0.6336347 |
| H | 2.2682351  | 2.4821017  | 1.5189991  |
| H | 1.3781593  | 1.0055797  | 1.9429467  |
| H | 0.4786329  | 2.5353472  | 1.5875731  |
| H | -1.1103251 | 1.2190673  | 1.4246324  |
| H | -3.5061995 | 0.9918050  | 1.8153217  |
| H | -3.8799233 | -1.4307612 | -1.7277018 |
| H | -1.4682167 | -1.1773567 | -2.1504480 |

e\_pent\_ss\_oz\_2\_ts1.log

E = -1110.799715

H = -1110.475324

G = -1110.546509

NImag=1

|   |            |            |            |
|---|------------|------------|------------|
| C | 0.5660725  | -2.1306237 | 0.8875969  |
| C | 1.4200854  | -1.0867937 | 1.2071848  |
| C | 0.8320406  | -2.9840859 | -0.2356895 |
| O | 1.8306911  | -2.8612994 | -0.9691456 |
| C | -0.1785948 | -4.0690201 | -0.5612782 |
| C | 1.2030865  | -0.2911551 | 2.4642824  |
| C | 1.0813056  | 0.4639727  | -0.3402736 |
| S | 2.0671456  | 1.8732291  | -0.0345380 |
| C | -0.3432517 | 0.6380475  | -0.2904913 |
| C | 3.7172175  | 1.1829041  | 0.1944664  |
| C | 2.3125763  | 2.6889162  | -1.6371150 |
| C | -1.1473181 | -0.3185595 | -0.9616096 |
| C | -2.5282249 | -0.3064875 | -0.8532864 |
| C | -3.1607759 | 0.6689867  | -0.0678226 |
| C | -2.3852177 | 1.6284974  | 0.6096120  |
| C | -1.0072169 | 1.6086423  | 0.5031430  |
| H | 2.4388527  | -1.1666244 | 0.8344238  |
| C | -4.5869084 | 0.6916424  | 0.0406747  |
| N | -5.7442512 | 0.7101501  | 0.1301329  |
| H | -0.3900016 | -2.2258456 | 1.3972080  |
| H | 0.3290274  | -5.0382256 | -0.5998006 |
| H | -0.9942935 | -4.1185920 | 0.1639475  |
| H | -0.5983224 | -3.8806291 | -1.5556864 |
| H | 1.8069981  | 0.6203814  | 2.5044271  |
| H | 1.4743854  | -0.8992954 | 3.3358791  |
| H | 0.1489303  | -0.0125716 | 2.5714604  |
| H | 1.4780742  | -0.1408343 | -1.1555019 |
| H | 4.4241847  | 2.0127422  | 0.1371189  |
| H | 3.7691355  | 0.7226978  | 1.1816702  |
| H | 3.9141778  | 0.4520730  | -0.5928528 |
| H | 3.0146973  | 3.5143244  | -1.4992696 |
| H | 1.3401156  | 3.0704164  | -1.9529171 |
| H | 2.6957922  | 1.9593406  | -2.3535190 |
| H | -0.6666220 | -1.0595961 | -1.5933627 |
| H | -3.1242926 | -1.0456347 | -1.3803561 |
| H | -2.8736214 | 2.3823776  | 1.2193572  |
| H | -0.4346042 | 2.3547628  | 1.0473038  |

e\_pent\_ss\_oz\_3\_ts1.log

E = -1110.795402

H = -1110.471317

G = -1110.542361

NImag=1

|   |            |            |           |
|---|------------|------------|-----------|
| C | -2.5132105 | -1.1654923 | 0.8635313 |
|---|------------|------------|-----------|

|   |            |            |            |
|---|------------|------------|------------|
| C | -1.3176207 | -0.8100584 | 1.4681401  |
| C | -2.5286035 | -1.8734102 | -0.3900229 |
| O | -1.5021282 | -2.1590922 | -1.0310851 |
| C | -3.8789694 | -2.2616062 | -0.9639969 |
| C | -1.2675070 | -0.3431987 | 2.8956335  |
| C | -0.3976825 | 1.0652662  | 0.5773684  |
| S | -1.4861122 | 1.2748694  | -0.7787773 |
| C | 0.9398768  | 0.6270017  | 0.3020373  |
| C | -2.8722409 | 2.0810035  | 0.0397226  |
| C | -0.8498256 | 2.6742825  | -1.7401210 |
| C | 1.9823830  | 0.9699972  | 1.2014441  |
| C | 3.2722163  | 0.5058586  | 1.0221052  |
| C | 3.5768196  | -0.3218539 | -0.0735642 |
| C | 2.5567762  | -0.6905781 | -0.9682680 |
| C | 1.2645950  | -0.2364505 | -0.7772373 |
| H | -0.4315800 | -1.3165649 | 1.0881599  |
| C | 4.9113820  | -0.7948257 | -0.2692517 |
| N | 5.9959592  | -1.1782768 | -0.4281508 |
| H | -3.4623569 | -0.8794412 | 1.3116289  |
| H | -3.8399271 | -3.2914935 | -1.3301017 |
| H | -4.6912292 | -2.1599090 | -0.2404789 |
| H | -4.0943704 | -1.6142712 | -1.8223592 |
| H | -0.3089090 | 0.1234625  | 3.1380253  |
| H | -1.3984118 | -1.2044478 | 3.5632801  |
| H | -2.0715112 | 0.3687440  | 3.1081975  |
| H | -0.5205440 | 1.8597275  | 1.3122123  |
| H | -3.6212747 | 2.3089618  | -0.7201702 |
| H | -3.2765619 | 1.3787107  | 0.7683086  |
| H | -2.5169562 | 2.9928531  | 0.5245769  |
| H | -1.5886192 | 2.9214479  | -2.5061908 |
| H | 0.0786467  | 2.3488420  | -2.2137491 |
| H | -0.6707203 | 3.5212110  | -1.0756782 |
| H | 1.7605447  | 1.6235948  | 2.0406940  |
| H | 4.0561803  | 0.7876098  | 1.7185814  |
| H | 2.7858094  | -1.3452406 | -1.8038747 |
| H | 0.4785373  | -0.5785622 | -1.4464544 |

e\_pent\_ss\_oz\_4\_ts1.log

E = -1110.792524

H = -1110.467933

G = -1110.538931

NImag=1

|   |            |            |            |
|---|------------|------------|------------|
| C | 2.7869237  | -1.6027449 | -0.2082240 |
| C | 1.5175366  | -1.5862883 | 0.3473224  |
| C | 3.8347053  | -0.7562404 | 0.2890047  |
| O | 3.6751326  | 0.0588079  | 1.2172152  |
| C | 5.1998731  | -0.8537522 | -0.3647327 |
| C | 0.5312108  | -2.6793952 | 0.0519579  |
| C | 0.3393187  | 0.0639621  | -0.6702971 |
| S | 1.3522816  | 1.4646239  | -0.4063916 |
| C | -1.0802029 | 0.0537872  | -0.4111673 |
| C | 0.4819166  | 2.9095534  | -1.0754587 |
| C | 1.3512125  | 1.9239401  | 1.3464133  |
| C | -1.6973171 | 0.6601478  | 0.7105425  |
| C | -3.0561212 | 0.5291969  | 0.9463454  |
| C | -3.8559125 | -0.2248631 | 0.0739374  |
| C | -3.2678093 | -0.8471000 | -1.0419926 |
| C | -1.9137182 | -0.7044095 | -1.2754085 |
| H | 1.4092236  | -1.0937080 | 1.3124507  |
| C | -5.2586124 | -0.3615622 | 0.3195142  |
| N | -6.3968508 | -0.4728813 | 0.5182486  |

|   |            |            |            |
|---|------------|------------|------------|
| H | 2.9892082  | -2.2315264 | -1.0724269 |
| H | 5.9668232  | -0.9634286 | 0.4078752  |
| H | 5.2729411  | -1.6840310 | -1.0707538 |
| H | 5.4034028  | 0.0814353  | -0.8987085 |
| H | -0.4816560 | -2.4218126 | 0.3680448  |
| H | 0.8311673  | -3.5803446 | 0.6017265  |
| H | 0.5187647  | -2.9300076 | -1.0138313 |
| H | 0.6360681  | -0.3498182 | -1.6312634 |
| H | 1.0662603  | 3.7976565  | -0.8228697 |
| H | 0.4336192  | 2.7863356  | -2.1584002 |
| H | -0.5201731 | 2.9730944  | -0.6466219 |
| H | 2.2719438  | 2.4861730  | 1.5094049  |
| H | 1.3807552  | 1.0120120  | 1.9399132  |
| H | 0.4823698  | 2.5408082  | 1.5779359  |
| H | -1.1080972 | 1.2251913  | 1.4225359  |
| H | -3.5047003 | 1.0040839  | 1.8135396  |
| H | -3.8825522 | -1.4297927 | -1.7213155 |
| H | -1.4704028 | -1.1817706 | -2.1450085 |

e\_pent\_ss\_oz\_7\_ts1.log

E = -1110.792911

H = -1110.468821

G = -1110.538552

NImag=1

|   |            |            |            |
|---|------------|------------|------------|
| C | 0.6973660  | 2.1757813  | -0.2841143 |
| C | 1.3859894  | 1.6835725  | 0.8137190  |
| C | -0.7250560 | 2.4006977  | -0.2487339 |
| O | -1.4235478 | 2.3082526  | 0.7749573  |
| C | -1.3927346 | 2.8536483  | -1.5379180 |
| C | 2.8594129  | 1.9385955  | 0.9884446  |
| C | 1.3924835  | -0.5469577 | 0.7091133  |
| S | 2.4748873  | -0.8757771 | -0.6496401 |
| C | -0.0023692 | -0.7853827 | 0.4667628  |
| C | 4.0704845  | -1.1191334 | 0.1576979  |
| C | 2.1737355  | -2.5962655 | -1.1488085 |
| C | -0.8506956 | -1.0903476 | 1.5621056  |
| C | -2.2168119 | -1.1880863 | 1.4086043  |
| C | -2.7956464 | -0.9869160 | 0.1386946  |
| C | -1.9784030 | -0.7101695 | -0.9641663 |
| C | -0.6044548 | -0.6121719 | -0.8036734 |
| H | 0.8112213  | 1.6050075  | 1.7358871  |
| C | -4.2132840 | -1.0877457 | -0.0274450 |
| N | -5.3637758 | -1.1698524 | -0.1601057 |
| H | 1.2261457  | 2.3644231  | -1.2170025 |
| H | -1.5693039 | 3.9347414  | -1.4904481 |
| H | -0.7890701 | 2.6410490  | -2.4242688 |
| H | -2.3668800 | 2.3648182  | -1.6314276 |
| H | 3.3112688  | 1.2803762  | 1.7348206  |
| H | 2.9971616  | 2.9713070  | 1.3329596  |
| H | 3.4031597  | 1.8457837  | 0.0410590  |
| H | 1.8057722  | -0.9295271 | 1.6420696  |
| H | 4.7309062  | -1.5717149 | -0.5840671 |
| H | 4.4683735  | -0.1544606 | 0.4646162  |
| H | 3.9373957  | -1.7832971 | 1.0138228  |
| H | 2.9023414  | -2.8491388 | -1.9222203 |
| H | 1.1639512  | -2.6559367 | -1.5570379 |
| H | 2.2793043  | -3.2431537 | -0.2759412 |
| H | -0.4080309 | -1.2405091 | 2.5433131  |
| H | -2.8507279 | -1.4207637 | 2.2588739  |
| H | -2.4243527 | -0.5683843 | -1.9442921 |
| H | 0.0019707  | -0.4003712 | -1.6802315 |

e\_pent\_ss\_oz\_9\_ts1.log

E = -1110.793003

H = -1110.468527

G = -1110.537945

NImag=1

|   |            |            |            |
|---|------------|------------|------------|
| C | 0.9383541  | -2.1625469 | 0.2260745  |
| C | 1.6184155  | -1.6134594 | -0.8513783 |
| C | -0.4653660 | -2.4740370 | 0.1461394  |
| O | -1.1428404 | -2.3828994 | -0.8915006 |
| C | -1.1418437 | -2.9953031 | 1.4039949  |
| C | 3.1177379  | -1.7046943 | -0.9774315 |
| C | 1.3612420  | 0.5817953  | -0.9010292 |
| S | 2.6409865  | 1.3135989  | 0.0404498  |
| C | -0.0317857 | 0.7720005  | -0.5703195 |
| C | 2.1329051  | 2.9940407  | 0.4963928  |
| C | 2.7071537  | 0.5755738  | 1.6974321  |
| C | -0.5341880 | 0.6304521  | 0.7425140  |
| C | -1.8974290 | 0.6843483  | 0.9976721  |
| C | -2.7997605 | 0.8726151  | -0.0561758 |
| C | -2.3227313 | 1.0237250  | -1.3722685 |
| C | -0.9651802 | 0.9735534  | -1.6155376 |
| H | 1.0727444  | -1.6182105 | -1.7937089 |
| C | -4.2068481 | 0.9224605  | 0.2076239  |
| N | -5.3470166 | 0.9629757  | 0.4200437  |
| H | 1.4466250  | -2.3262738 | 1.1738946  |
| H | -1.3570139 | -4.0629543 | 1.2806963  |
| H | -0.5312430 | -2.8634502 | 2.3009204  |
| H | -2.0993229 | -2.4817088 | 1.5359845  |
| H | 3.5186357  | -0.9864424 | -1.6980211 |
| H | 3.3782320  | -2.7089543 | -1.3346042 |
| H | 3.6244172  | -1.5663146 | -0.0163034 |
| H | 1.6265939  | 0.7417222  | -1.9450275 |
| H | 2.8917441  | 3.3968113  | 1.1717068  |
| H | 2.0934549  | 3.5815953  | -0.4218938 |
| H | 1.1566870  | 2.9645582  | 0.9843052  |
| H | 3.7322921  | 0.6964118  | 2.0516235  |
| H | 2.4575703  | -0.4818717 | 1.6203398  |
| H | 2.0157168  | 1.0881475  | 2.3671225  |
| H | 0.1383969  | 0.4624017  | 1.5755131  |
| H | -2.2681663 | 0.5683765  | 2.0117556  |
| H | -3.0241685 | 1.1813225  | -2.1858277 |
| H | -0.5989312 | 1.0861522  | -2.6325410 |

e\_pentenone\_1.log

E = -270.451269

H = -270.324733

G = -270.363874

NImag=0

|   |            |           |            |
|---|------------|-----------|------------|
| C | -0.9707749 | 2.2759810 | -0.2626491 |
| C | 0.4412793  | 2.4800984 | -0.6567463 |
| O | 0.7125269  | 2.7393357 | -1.8226089 |
| H | -1.6949708 | 2.3746264 | -1.0701755 |
| C | 1.5271344  | 2.3655465 | 0.3851386  |
| H | 2.4950448  | 2.5457623 | -0.0836721 |
| H | 1.3669263  | 3.0939514 | 1.1860017  |
| H | 1.5192683  | 1.3690650 | 0.8374624  |
| C | -2.7930094 | 1.7830553 | 1.3871947  |
| H | -3.4733961 | 1.8931624 | 0.5392944  |
| H | -2.9224062 | 0.7849671 | 1.8205712  |

|   |            |           |           |
|---|------------|-----------|-----------|
| H | -3.0741212 | 2.5017619 | 2.1651400 |
| C | -1.3706979 | 1.9897177 | 0.9839214 |
| H | -0.6274074 | 1.8959299 | 1.7755724 |

e\_pentenone\_2.log

E = -270.450203  
H = -270.323838  
G = -270.363528

NImag=0

|   |            |            |            |
|---|------------|------------|------------|
| C | 0.2826329  | -0.5694403 | 0.0225924  |
| C | -1.1561512 | -0.1984753 | -0.0376791 |
| O | -1.7485811 | -0.0458695 | -1.0966970 |
| H | 0.7271237  | -0.6841974 | 1.0097144  |
| C | -1.8462335 | -0.0210207 | 1.2886643  |
| H | -2.8930611 | 0.2485209  | 1.1446260  |
| H | -1.7745800 | -0.9488894 | 1.8668054  |
| H | -1.3354490 | 0.7567556  | 1.8670142  |
| C | 2.4559307  | -1.1295124 | -1.1036430 |
| H | 2.8605842  | -1.2342384 | -0.0939888 |
| H | 2.5970505  | -2.0728065 | -1.6433567 |
| H | 3.0355820  | -0.3715368 | -1.6426205 |
| C | 1.0115344  | -0.7571796 | -1.0848745 |
| H | 0.5176179  | -0.6296945 | -2.0486166 |

sy\_1.log

E = -840.355846  
H = -840.159278  
G = -840.212336

NImag=0

|   |            |            |            |
|---|------------|------------|------------|
| C | -1.3829606 | 0.7429653  | 0.0412540  |
| C | -0.0082717 | 0.4247907  | 0.0212764  |
| C | 0.5319224  | -0.8983921 | -0.0415589 |
| C | 1.8911289  | -1.1267858 | -0.0574160 |
| C | 2.8072370  | -0.0561436 | -0.0119478 |
| C | 2.3030377  | 1.2604721  | 0.0504374  |
| C | 0.9460058  | 1.4913085  | 0.0664098  |
| S | -2.5907470 | -0.4601193 | -0.0088824 |
| C | -3.7126159 | -0.0083922 | -1.3581369 |
| C | -3.7019147 | -0.1333726 | 1.3845396  |
| C | 4.2093317  | -0.2985481 | -0.0286471 |
| N | 5.3557420  | -0.4965890 | -0.0422978 |
| H | -1.7259171 | 1.7717229  | 0.0900533  |
| H | -0.1364541 | -1.7533864 | -0.0781379 |
| H | 2.2629799  | -2.1464756 | -0.1056469 |
| H | 2.9941440  | 2.0980814  | 0.0861084  |
| H | 0.5806283  | 2.5134717  | 0.1147337  |
| H | -3.1637921 | -0.1411144 | -2.2913086 |
| H | -4.5777426 | -0.6745161 | -1.3283540 |
| H | -4.0178224 | 1.0328182  | -1.2335648 |
| H | -3.1458824 | -0.3501682 | 2.2974787  |
| H | -4.5674532 | -0.7943713 | 1.3010192  |
| H | -4.0077970 | 0.9147199  | 1.3575526  |

sy\_2.log

E = -840.354449  
H = -840.157694  
G = -840.210628

NImag=0

|   |            |           |            |
|---|------------|-----------|------------|
| C | -1.2652149 | 0.5735965 | -0.0594590 |
|---|------------|-----------|------------|

|   |            |            |            |
|---|------------|------------|------------|
| C | -0.4068833 | 0.8501953  | 1.0314815  |
| C | -0.6581586 | 0.5084452  | 2.3927205  |
| C | 0.2393256  | 0.8189430  | 3.3969019  |
| C | 1.4411112  | 1.4882996  | 3.1068782  |
| C | 1.7178874  | 1.8396922  | 1.7684086  |
| C | 0.8237483  | 1.5302261  | 0.7687981  |
| S | -2.7735625 | -0.2115660 | -0.0482776 |
| C | -3.9207917 | 0.5891272  | 1.1128567  |
| C | -2.6549596 | -1.8482061 | 0.7345935  |
| C | 2.3632592  | 1.8062118  | 4.1461424  |
| N | 3.1160702  | 2.0659921  | 4.9931483  |
| H | -0.9850866 | 0.8744336  | -1.0614153 |
| H | -1.5690572 | -0.0081854 | 2.6719923  |
| H | 0.0140802  | 0.5427216  | 4.4230003  |
| H | 2.6426979  | 2.3571617  | 1.5295926  |
| H | 1.0538475  | 1.8086989  | -0.2560149 |
| H | -4.0551744 | 1.6140531  | 0.7645014  |
| H | -4.8680368 | 0.0479775  | 1.0581770  |
| H | -3.5350635 | 0.5770165  | 2.1318819  |
| H | -1.9538115 | -2.4318945 | 0.1366157  |
| H | -3.6485106 | -2.3001918 | 0.6936186  |
| H | -2.3129432 | -1.7763933 | 1.7666873  |

z\_pent\_sr\_oe\_1\_ts1.log

E = -1110.786849

H = -1110.462291

G = -1110.531722

NImag=1

|   |            |            |            |
|---|------------|------------|------------|
| C | 2.5705298  | -1.4405756 | 0.8005425  |
| C | 1.2328532  | -1.3993124 | 0.3839752  |
| C | 3.7755455  | -1.3547417 | 0.0305567  |
| O | 4.8969584  | -1.3885710 | 0.5784246  |
| C | 3.7374239  | -1.2034182 | -1.4831823 |
| C | 0.7413293  | -1.7196089 | -1.0100323 |
| C | 0.3039763  | 0.5291943  | 0.6666143  |
| S | 1.0907578  | 1.7221636  | -0.3653228 |
| C | -1.1017811 | 0.3043151  | 0.4158193  |
| C | 0.3297822  | 3.3278825  | 0.0072351  |
| C | 2.6690341  | 1.9568574  | 0.4717024  |
| C | -1.7522241 | 0.5840894  | -0.8113647 |
| C | -3.0751133 | 0.2362398  | -1.0196397 |
| C | -3.8026568 | -0.4084848 | -0.0056298 |
| C | -3.1811003 | -0.6942482 | 1.2216553  |
| C | -1.8597609 | -0.3398179 | 1.4251381  |
| C | -5.1717789 | -0.7654838 | -0.2191434 |
| N | -6.2820339 | -1.0560392 | -0.3925527 |
| H | 2.7433357  | -1.4645651 | 1.8756239  |
| H | 0.5331359  | -1.7198259 | 1.1562679  |
| H | 3.1855918  | -0.3048446 | -1.7825515 |
| H | 4.7629248  | -1.1236935 | -1.8486260 |
| H | 3.2529180  | -2.0597321 | -1.9611802 |
| H | -0.3498468 | -1.7515996 | -1.0284815 |
| H | 1.1081933  | -2.7073293 | -1.3110987 |
| H | 1.0716230  | -1.0025478 | -1.7659707 |
| H | 0.5808024  | 0.6833530  | 1.7091761  |
| H | 0.9074009  | 4.0980059  | -0.5096443 |
| H | -0.6926421 | 3.3106539  | -0.3731752 |
| H | 0.3412968  | 3.4817692  | 1.0879375  |
| H | 3.1870596  | 2.7674801  | -0.0430415 |
| H | 3.2416840  | 1.0339775  | 0.3977973  |
| H | 2.4819733  | 2.2132288  | 1.5165376  |

|   |            |            |            |
|---|------------|------------|------------|
| H | -1.2171210 | 1.0706738  | -1.6231859 |
| H | -3.5542452 | 0.4610237  | -1.9675760 |
| H | -3.7425029 | -1.1874500 | 2.0092100  |
| H | -1.3892178 | -0.5562909 | 2.3804252  |

z\_pent\_sr\_oe\_2\_ts1.log

E = -1110.791650  
H = -1110.466426  
G = -1110.533101

NImag=1

|   |            |            |            |
|---|------------|------------|------------|
| C | 1.0367038  | -2.0922250 | -0.4188877 |
| C | 1.5688385  | -1.6208965 | 0.7903589  |
| C | -0.2982811 | -2.5057141 | -0.7441759 |
| O | -0.5792468 | -2.9342173 | -1.8832654 |
| C | -1.4142103 | -2.4863157 | 0.2901281  |
| C | 0.9905565  | -1.9024009 | 2.1615346  |
| C | 1.4436043  | 0.5018968  | 0.9528234  |
| S | 2.8020213  | 1.2007645  | 0.0792044  |
| C | 0.0778481  | 0.7939052  | 0.5748002  |
| C | 3.1653959  | 0.2734286  | -1.4330987 |
| C | 2.2720216  | 2.7696372  | -0.6519717 |
| C | -0.3866362 | 0.6911163  | -0.7546147 |
| C | -1.7351438 | 0.8282874  | -1.0548223 |
| C | -2.6592579 | 1.0607409  | -0.0284055 |
| C | -2.2210991 | 1.1723863  | 1.3037373  |
| C | -0.8750540 | 1.0409292  | 1.5916591  |
| C | -4.0528087 | 1.1934280  | -0.3376089 |
| N | -5.1809120 | 1.3006692  | -0.5855728 |
| H | 1.7079564  | -2.1219830 | -1.2748249 |
| H | 2.6586829  | -1.6038292 | 0.8044791  |
| H | -1.4855038 | -1.5257248 | 0.8059211  |
| H | -2.3587624 | -2.6928833 | -0.2181248 |
| H | -1.2484687 | -3.2600106 | 1.0482292  |
| H | 1.6593380  | -1.5236391 | 2.9384324  |
| H | 0.8826893  | -2.9839179 | 2.3031939  |
| H | 0.0068758  | -1.4513311 | 2.3130029  |
| H | 1.6695286  | 0.6617616  | 2.0055986  |
| H | 3.9679484  | 0.8301051  | -1.9222548 |
| H | 3.5313726  | -0.7127092 | -1.1492512 |
| H | 2.2994425  | 0.2042385  | -2.0898982 |
| H | 3.1362905  | 3.1932657  | -1.1678269 |
| H | 1.9668975  | 3.4210834  | 0.1683354  |
| H | 1.4485033  | 2.6081826  | -1.3486383 |
| H | 0.3051292  | 0.4931979  | -1.5649803 |
| H | -2.0782654 | 0.7413685  | -2.0811543 |
| H | -2.9387390 | 1.3624377  | 2.0956074  |
| H | -0.5366017 | 1.1276622  | 2.6206334  |

z\_pent\_sr\_oe\_3\_ts1.log

E = -1110.789976  
H = -1110.465272  
G = -1110.532492

NImag=1

|   |            |            |            |
|---|------------|------------|------------|
| C | 0.9111032  | -2.0841652 | -0.1642298 |
| C | 1.4725430  | -1.3894912 | 0.9096158  |
| C | -0.4339748 | -2.5532012 | -0.3656201 |
| O | -0.7400203 | -3.1923349 | -1.3918737 |
| C | -1.5208543 | -2.3301906 | 0.6741401  |
| C | 0.9295017  | -1.3648345 | 2.3205168  |
| C | 1.3831367  | 0.7654612  | 0.6193785  |



|   |            |            |            |
|---|------------|------------|------------|
| S | 2.5032284  | 1.3158794  | -0.6416422 |
| C | -0.0069770 | 0.9842238  | 0.3214386  |
| C | 3.9650517  | 1.7080009  | 0.3370164  |
| C | 3.1537002  | -0.0939960 | -1.5813422 |
| C | -0.5409639 | 0.6796155  | -0.9530776 |
| C | -1.9047075 | 0.7515844  | -1.1949373 |
| C | -2.7788849 | 1.1183249  | -0.1621567 |
| C | -2.2706461 | 1.4297022  | 1.1142054  |
| C | -0.9103871 | 1.3606973  | 1.3460754  |
| C | -4.1882887 | 1.1831112  | -0.4073146 |
| N | -5.3308300 | 1.2360017  | -0.6038655 |
| H | 1.5586837  | -2.2856578 | -1.0148913 |
| H | 2.5606530  | -1.3467260 | 0.8894550  |
| H | -1.3106228 | -2.9078671 | 1.5809650  |
| H | -1.6049944 | -1.2792212 | 0.9617934  |
| H | -2.4725312 | -2.6661260 | 0.2566717  |
| H | 1.6041316  | -0.8079600 | 2.9757795  |
| H | 0.8538122  | -2.3892697 | 2.7039426  |
| H | -0.0625754 | -0.9143790 | 2.3944923  |
| H | 1.7474889  | 1.1229916  | 1.5804468  |
| H | 4.7770117  | 1.9341345  | -0.3557033 |
| H | 3.7327231  | 2.5834572  | 0.9444589  |
| H | 4.2158076  | 0.8503546  | 0.9647705  |
| H | 3.9295411  | 0.3239632  | -2.2270672 |
| H | 2.3470809  | -0.4964342 | -2.1942581 |
| H | 3.5699797  | -0.8541793 | -0.9202191 |
| H | 0.1164698  | 0.3722308  | -1.7630330 |
| H | -2.3004851 | 0.5101077  | -2.1768044 |
| H | -2.9496196 | 1.7260336  | 1.9077291  |
| H | -0.5196410 | 1.6050880  | 2.3301595  |

z\_pent\_sr\_oe\_4\_ts1.log

E = -1110.782538

H = -1110.457586

G = -1110.525927

NImag=1

|   |            |            |            |
|---|------------|------------|------------|
| C | -2.5146126 | -1.0801486 | -0.9770885 |
| C | -1.1608543 | -1.1964420 | -0.6258704 |
| C | -3.7058696 | -1.2442984 | -0.1982449 |
| O | -4.8265897 | -0.9611294 | -0.6741515 |
| C | -3.6771274 | -1.8365362 | 1.2053273  |
| C | -0.6419838 | -1.7914743 | 0.6593896  |
| C | -0.1865925 | 0.7117444  | -0.7038532 |
| S | -0.9040500 | 2.0656891  | 0.1982085  |
| C | 1.2154301  | 0.4755903  | -0.4427918 |
| C | -2.2572847 | 2.5374006  | -0.8956445 |
| C | -1.8485013 | 1.3666572  | 1.5747673  |
| C | 1.8361053  | 0.7409355  | 0.8017772  |
| C | 3.1507476  | 0.3814854  | 1.0405204  |
| C | 3.8913969  | -0.2776762 | 0.0450429  |
| C | 3.2944096  | -0.5606078 | -1.1951988 |
| C | 1.9840970  | -0.1853934 | -1.4323842 |
| C | 5.2487649  | -0.6569377 | 0.2928556  |
| N | 6.3497009  | -0.9643925 | 0.4943150  |
| H | -2.7165688 | -0.7603996 | -1.9992186 |
| H | -0.4987729 | -1.4007888 | -1.4678533 |
| H | -3.2621508 | -1.1381541 | 1.9406019  |
| H | -4.7043436 | -2.0661737 | 1.4957562  |
| H | -3.0772508 | -2.7490712 | 1.2497923  |
| H | 0.4440819  | -1.6871633 | 0.7184788  |
| H | -0.8686204 | -2.8644698 | 0.6774326  |

|   |            |            |            |
|---|------------|------------|------------|
| H | -1.0819107 | -1.3432424 | 1.5514363  |
| H | -0.4524688 | 0.8451794  | -1.7503716 |
| H | -2.8668457 | 3.2714189  | -0.3658726 |
| H | -1.8191899 | 2.9856172  | -1.7885284 |
| H | -2.8376755 | 1.6466729  | -1.1439457 |
| H | -2.3502870 | 2.2026805  | 2.0662496  |
| H | -1.1429475 | 0.9001523  | 2.2636652  |
| H | -2.5676353 | 0.6490758  | 1.1879021  |
| H | 1.2832718  | 1.2280272  | 1.6016903  |
| H | 3.6110021  | 0.6006167  | 1.9990884  |
| H | 3.8677406  | -1.0645124 | -1.9672913 |
| H | 1.5353107  | -0.3920556 | -2.4002224 |

z\_pent\_sr\_oe\_5\_ts1.log

E = -1110.794017  
H = -1110.469431  
G = -1110.537694

NImag=1

|   |            |            |            |
|---|------------|------------|------------|
| C | 0.9171778  | -2.1648707 | -0.3460901 |
| C | 1.4139850  | -1.5900077 | 0.8276613  |
| C | -0.4217839 | -2.5612196 | -0.6862180 |
| O | -0.6813567 | -3.0583804 | -1.8008408 |
| C | -1.5627656 | -2.4483904 | 0.3153153  |
| C | 0.7686000  | -1.6463060 | 2.1920712  |
| C | 1.4278867  | 0.5799260  | 0.6611042  |
| S | 2.5353989  | 0.8669219  | -0.6760432 |
| C | 0.0467261  | 0.8681747  | 0.3769866  |
| C | 2.8241518  | 2.6548169  | -0.6884044 |
| C | 4.1276284  | 0.3036014  | -0.0467581 |
| C | -0.5363212 | 0.6555871  | -0.8973276 |
| C | -1.9027009 | 0.7877100  | -1.0915727 |
| C | -2.7356547 | 1.1340859  | -0.0187658 |
| C | -2.1784714 | 1.3656041  | 1.2539660  |
| C | -0.8161038 | 1.2371564  | 1.4407587  |
| C | -4.1469854 | 1.2657718  | -0.2192197 |
| N | -5.2915651 | 1.3718079  | -0.3798315 |
| H | 1.6246232  | -2.2919408 | -1.1655576 |
| H | 2.4995435  | -1.6066924 | 0.9006805  |
| H | -1.6618154 | -1.4364248 | 0.7170224  |
| H | -2.4913359 | -2.7241464 | -0.1894277 |
| H | -1.4046222 | -3.1285052 | 1.1594285  |
| H | 1.3953819  | -1.1325934 | 2.9257108  |
| H | 0.6692938  | -2.6924439 | 2.5060475  |
| H | -0.2261240 | -1.1988059 | 2.2230081  |
| H | 1.8334779  | 0.9585079  | 1.5998494  |
| H | 3.5619808  | 2.8755474  | -1.4627718 |
| H | 1.8728253  | 3.1319099  | -0.9313287 |
| H | 3.1761998  | 2.9689081  | 0.2961068  |
| H | 4.8968244  | 0.7936172  | -0.6466874 |
| H | 4.1953186  | -0.7755278 | -0.1814785 |
| H | 4.2222930  | 0.5818479  | 1.0048327  |
| H | 0.0818534  | 0.3821920  | -1.7463575 |
| H | -2.3322009 | 0.6136315  | -2.0736629 |
| H | -2.8217976 | 1.6470579  | 2.0818977  |
| H | -0.3910326 | 1.4164946  | 2.4246897  |

z\_pent\_sr\_oz\_1\_ts1.log

E = -1110.793767  
H = -1110.469501  
G = -1110.539544

NImag=1

|   |            |            |            |
|---|------------|------------|------------|
| C | 0.8462386  | -2.1515313 | -0.2853957 |
| C | 1.4413319  | -1.6049228 | 0.8510179  |
| C | -0.5332922 | -2.5344434 | -0.4045631 |
| O | -1.3501555 | -2.5929107 | 0.5337599  |
| C | -1.0154268 | -2.9533680 | -1.7874923 |
| C | 0.8196845  | -1.6420603 | 2.2208502  |
| C | 1.4439357  | 0.6004193  | 0.6465806  |
| S | 2.5338049  | 0.8681355  | -0.7047030 |
| C | 0.0581344  | 0.8668852  | 0.3771709  |
| C | 2.8138914  | 2.6577109  | -0.7585201 |
| C | 4.1379240  | 0.3305357  | -0.0825758 |
| C | -0.7908252 | 1.2586669  | 1.4446686  |
| C | -2.1539867 | 1.3900846  | 1.2720818  |
| C | -2.7280859 | 1.1356780  | 0.0107539  |
| C | -1.9098483 | 0.7631342  | -1.0647314 |
| C | -0.5419215 | 0.6286358  | -0.8854826 |
| C | -4.1395251 | 1.2784142  | -0.1775316 |
| N | -5.2845256 | 1.3949255  | -0.3290623 |
| H | 1.4487911  | -2.2170232 | -1.1889167 |
| H | 2.5289529  | -1.6024068 | 0.8669918  |
| H | -0.2645546 | -2.8098398 | -2.5683619 |
| H | -1.3062927 | -4.0094268 | -1.7642704 |
| H | -1.9105269 | -2.3750355 | -2.0392282 |
| H | 1.4369375  | -1.0993717 | 2.9421220  |
| H | 0.7354818  | -2.6846284 | 2.5513722  |
| H | -0.1926908 | -1.2347911 | 2.2156383  |
| H | 1.8583460  | 0.9867418  | 1.5779672  |
| H | 3.5428897  | 2.8663857  | -1.5445544 |
| H | 1.8574675  | 3.1247572  | -1.0010073 |
| H | 3.1739809  | 2.9932322  | 0.2160618  |
| H | 4.8963816  | 0.8156653  | -0.6999186 |
| H | 4.2144449  | -0.7502712 | -0.1965866 |
| H | 4.2411157  | 0.6300591  | 0.9623234  |
| H | -0.3521852 | 1.4566755  | 2.4190579  |
| H | -2.7859742 | 1.6924079  | 2.1014355  |
| H | -2.3525892 | 0.5758518  | -2.0385775 |
| H | 0.0655164  | 0.3434987  | -1.7386578 |

z\_pent\_sr\_oz\_2\_ts1.log

E = -1110.792782  
H = -1110.468236  
G = -1110.538747

NImag=1

|   |            |            |            |
|---|------------|------------|------------|
| C | 2.3802928  | -1.5933459 | 0.4912856  |
| C | 1.1917182  | -1.3139068 | -0.1850907 |
| C | 3.7088585  | -1.4025972 | -0.0081060 |
| O | 3.9948220  | -0.8957756 | -1.1124208 |
| C | 4.8552665  | -1.8432397 | 0.8870353  |
| C | 1.0974958  | -1.0736108 | -1.6687823 |
| C | 0.2211152  | 0.5417583  | 0.5549922  |
| S | 0.8639852  | 1.9295222  | -0.2879253 |
| C | -1.1851023 | 0.2743025  | 0.3668046  |
| C | 0.5057076  | 3.3723796  | 0.7519851  |
| C | 2.6391172  | 1.7993933  | -0.0200840 |
| C | -1.9324197 | 0.6728440  | -0.7696437 |
| C | -3.2527485 | 0.2909606  | -0.9330720 |
| C | -3.8810686 | -0.5133752 | 0.0315617  |
| C | -3.1595702 | -0.9297369 | 1.1634205  |
| C | -1.8420308 | -0.5418615 | 1.3230126  |
| C | -5.2466992 | -0.9048971 | -0.1374307 |

|   |            |            |            |
|---|------------|------------|------------|
| N | -6.3544901 | -1.2232355 | -0.2747869 |
| H | 2.2944033  | -1.9933471 | 1.4983010  |
| H | 0.3071071  | -1.7840432 | 0.2430715  |
| H | 4.5262891  | -2.4182378 | 1.7553338  |
| H | 5.5637958  | -2.4377996 | 0.3028135  |
| H | 5.3875905  | -0.9513556 | 1.2381873  |
| H | 0.0761664  | -0.8050116 | -1.9540969 |
| H | 1.3618984  | -1.9998230 | -2.1953004 |
| H | 1.7938877  | -0.3102003 | -2.0182387 |
| H | 0.5960521  | 0.4791698  | 1.5753169  |
| H | 0.9847032  | 4.2455136  | 0.3029845  |
| H | -0.5779330 | 3.5020560  | 0.7616064  |
| H | 0.8850480  | 3.1882064  | 1.7591820  |
| H | 3.0717776  | 2.7579603  | -0.3138555 |
| H | 3.0266738  | 0.9978681  | -0.6522247 |
| H | 2.8321686  | 1.5966501  | 1.0361286  |
| H | -1.4768193 | 1.2916808  | -1.5375363 |
| H | -3.8065216 | 0.6129652  | -1.8096808 |
| H | -3.6409224 | -1.5516055 | 1.9120097  |
| H | -1.2939287 | -0.8627468 | 2.2049297  |

z\_pent\_sr\_oz\_3\_ts1.log

E = -1110.789926

H = -1110.465630

G = -1110.535578

NImag=1

|   |            |            |            |
|---|------------|------------|------------|
| C | -0.8299791 | 2.0549354  | -0.1888550 |
| C | -1.5178079 | 1.4398131  | 0.8539084  |
| C | 0.5407164  | 2.4887112  | -0.1465500 |
| O | 1.2581657  | 2.5130035  | 0.8697859  |
| C | 1.1445519  | 2.9947223  | -1.4498947 |
| C | -1.0457119 | 1.4555510  | 2.2839598  |
| C | -1.4050361 | -0.7614243 | 0.6116586  |
| S | -2.4970938 | -1.3397674 | -0.6570496 |
| C | -0.0094293 | -0.9695205 | 0.3512405  |
| C | -3.9880203 | -1.6829992 | 0.2954988  |
| C | -3.1080278 | 0.0449060  | -1.6600879 |
| C | 0.8783083  | -1.2881411 | 1.4097707  |
| C | 2.2408453  | -1.3711486 | 1.2042542  |
| C | 2.7718883  | -1.1324898 | -0.0794524 |
| C | 1.9152735  | -0.8180552 | -1.1436562 |
| C | 0.5484374  | -0.7261629 | -0.9274339 |
| C | 4.1832937  | -1.2234045 | -0.2995323 |
| N | 5.3280209  | -1.2989140 | -0.4765543 |
| H | -1.3347306 | 2.1533689  | -1.1454252 |
| H | -2.5987523 | 1.3762604  | 0.7461563  |
| H | 0.4640116  | 2.9146165  | -2.3009760 |
| H | 1.4433388  | 4.0415495  | -1.3285480 |
| H | 2.0524545  | 2.4200648  | -1.6629307 |
| H | -1.7335822 | 0.8998222  | 2.9268064  |
| H | -0.9969147 | 2.4916830  | 2.6398704  |
| H | -0.0372034 | 1.0481921  | 2.3793778  |
| H | -1.7927353 | -1.0745421 | 1.5783962  |
| H | -4.7859292 | -1.9190945 | -0.4101037 |
| H | -3.7831223 | -2.5425113 | 0.9347283  |
| H | -4.2418503 | -0.8032234 | 0.8905590  |
| H | -3.8558128 | -0.3891410 | -2.3278545 |
| H | -2.2761865 | 0.4317599  | -2.2490630 |
| H | -3.5523464 | 0.8220140  | -1.0382457 |
| H | 0.4711684  | -1.4818351 | 2.3985115  |
| H | 2.9059525  | -1.6265125 | 2.0234332  |

|   |            |            |            |
|---|------------|------------|------------|
| H | 2.3269506  | -0.6337453 | -2.1314984 |
| H | -0.0933766 | -0.4641591 | -1.7656697 |

z\_pent\_sr\_oz\_4\_ts1.log

E = -1110.791960  
H = -1110.466948  
G = -1110.534964

NImag=1

|   |            |            |            |
|---|------------|------------|------------|
| C | 0.8969805  | -2.0615681 | -0.4635282 |
| C | 1.5896648  | -1.6981092 | 0.6952893  |
| C | -0.4947918 | -2.4036445 | -0.5246704 |
| O | -1.2483482 | -2.5460931 | 0.4570808  |
| C | -1.0812975 | -2.6577746 | -1.9078177 |
| C | 1.0997313  | -2.0255220 | 2.0841553  |
| C | 1.4903679  | 0.4560074  | 0.9389904  |
| S | 2.8381460  | 1.1460968  | 0.0513221  |
| C | 0.1200925  | 0.7637380  | 0.6032410  |
| C | 3.1206531  | 0.2749752  | -1.5126268 |
| C | 2.3452789  | 2.7634645  | -0.5982262 |
| C | -0.3693356 | 0.7526934  | -0.7217536 |
| C | -1.7208175 | 0.9226039  | -0.9887812 |
| C | -2.6257201 | 1.0910033  | 0.0662147  |
| C | -2.1632458 | 1.1063564  | 1.3954844  |
| C | -0.8151866 | 0.9455057  | 1.6502035  |
| C | -4.0214472 | 1.2622207  | -0.2099517 |
| N | -5.1516984 | 1.4016704  | -0.4320426 |
| H | 1.4184357  | -1.9875815 | -1.4138114 |
| H | 2.6756754  | -1.6822954 | 0.6084397  |
| H | -0.4118279 | -2.3640296 | -2.7204041 |
| H | -1.3121392 | -3.7241884 | -2.0114842 |
| H | -2.0246705 | -2.1099793 | -2.0000040 |
| H | 1.8065063  | -1.6703838 | 2.8387592  |
| H | 0.9974252  | -3.1124137 | 2.1868609  |
| H | 0.1116617  | -1.5999022 | 2.2701007  |
| H | 1.7469567  | 0.5591887  | 1.9911946  |
| H | 3.9483989  | 0.8049295  | -1.9891733 |
| H | 3.4278677  | -0.7460654 | -1.2887579 |
| H | 2.2426224  | 0.2942359  | -2.1567370 |
| H | 3.2057700  | 3.1742354  | -1.1305625 |
| H | 2.0972999  | 3.3918569  | 0.2584235  |
| H | 1.4902382  | 2.6629126  | -1.2678657 |
| H | 0.3061352  | 0.6140565  | -1.5577456 |
| H | -2.0807470 | 0.9138687  | -2.0131344 |
| H | -2.8657851 | 1.2485713  | 2.2107270  |
| H | -0.4586410 | 0.9617766  | 2.6766206  |

z\_pent\_sr\_oz\_5\_ts1.log

E = -1110.789497  
H = -1110.464619  
G = -1110.535227

NImag=1

|   |            |            |            |
|---|------------|------------|------------|
| C | -2.7742094 | -1.0769127 | -0.8904812 |
| C | -1.3976719 | -1.3300917 | -0.9070076 |
| C | -3.6281011 | -1.1758010 | 0.2534129  |
| O | -3.2457282 | -1.4598634 | 1.4081188  |
| C | -5.1094171 | -0.9108168 | 0.0408563  |
| C | -0.6587932 | -2.0243091 | 0.2071690  |
| C | -0.2407385 | 0.5632290  | -1.0343755 |
| S | -1.3130055 | 1.7637849  | -0.3540465 |
| C | 1.1123429  | 0.3411616  | -0.5928960 |

|   |            |            |            |
|---|------------|------------|------------|
| C | -1.7166782 | 1.3426426  | 1.3617249  |
| C | -0.3750354 | 3.2905357  | -0.0945936 |
| C | 1.5716040  | 0.5120194  | 0.7353380  |
| C | 2.8599556  | 0.1611543  | 1.1028274  |
| C | 3.7416972  | -0.3838790 | 0.1565255  |
| C | 3.3104308  | -0.5647340 | -1.1699969 |
| C | 2.0272296  | -0.2030541 | -1.5319965 |
| C | 5.0706722  | -0.7503796 | 0.5384314  |
| N | 6.1491328  | -1.0483803 | 0.8475997  |
| H | -3.2407104 | -0.7865897 | -1.8281514 |
| H | -0.9765819 | -1.5118597 | -1.8931932 |
| H | -5.3800742 | -0.8040705 | -1.0118951 |
| H | -5.6917717 | -1.7233913 | 0.4856700  |
| H | -5.3788990 | 0.0118556  | 0.5682881  |
| H | 0.3839315  | -2.1974106 | -0.0691131 |
| H | -1.1350582 | -2.9940256 | 0.3953916  |
| H | -0.6905163 | -1.4741937 | 1.1493918  |
| H | -0.3713732 | 0.6238099  | -2.1121321 |
| H | -2.6460672 | 1.8691284  | 1.5910252  |
| H | -1.8834176 | 0.2669253  | 1.4319975  |
| H | -0.9271932 | 1.6771206  | 2.0345131  |
| H | -1.0365881 | 3.9975488  | 0.4114108  |
| H | -0.0976606 | 3.6723480  | -1.0781003 |
| H | 0.5118789  | 3.0924531  | 0.5094534  |
| H | 0.9139316  | 0.9087601  | 1.5001419  |
| H | 3.1890386  | 0.3011464  | 2.1279700  |
| H | 3.9905742  | -0.9819470 | -1.9063540 |
| H | 1.7042469  | -0.3416098 | -2.5603082 |

z\_pent\_ss\_oe\_1\_ts1.log

E = -1110.783853

H = -1110.459435

G = -1110.529109

NImag=1

|   |            |            |            |
|---|------------|------------|------------|
| C | -2.8189920 | -0.5979550 | -0.9202550 |
| C | -1.4481340 | -0.6265480 | -1.1822180 |
| C | -3.5985230 | -1.4686940 | -0.0836770 |
| O | -4.8273930 | -1.3100990 | 0.0440380  |
| C | -2.9377830 | -2.5952670 | 0.6913510  |
| C | -0.5751400 | -1.8599730 | -1.1715280 |
| C | -0.3637200 | 0.4353370  | 0.4104050  |
| S | -0.8602130 | 2.1373090  | 0.4524940  |
| C | 1.0651290  | 0.2403680  | 0.3384050  |
| C | -1.5255630 | 2.6256110  | -1.1644280 |
| C | -2.3833200 | 2.0612170  | 1.4138340  |
| C | 1.6595610  | -0.8599000 | 1.0070740  |
| C | 3.0068600  | -1.1383750 | 0.8817610  |
| C | 3.8230640  | -0.3170290 | 0.0815830  |
| C | 3.2600510  | 0.7824830  | -0.5859600 |
| C | 1.9071220  | 1.0492970  | -0.4640270 |
| H | -1.1247750 | 0.1004670  | -1.9259390 |
| C | 5.2192470  | -0.5982120 | -0.0491540 |
| N | 6.3525930  | -0.8264640 | -0.1551770 |
| H | -3.3895070 | 0.2434710  | -1.3084770 |
| H | -2.0880030 | -2.2289930 | 1.2776050  |
| H | -3.6759100 | -3.0380960 | 1.3627750  |
| H | -2.5625660 | -3.3701820 | 0.0152910  |
| H | 0.4256590  | -1.6186780 | -1.5364450 |
| H | -1.0075690 | -2.6114600 | -1.8428560 |
| H | -0.4716810 | -2.3168150 | -0.1855920 |
| H | -0.8822900 | -0.1008390 | 1.2023190  |

|   |            |            |            |
|---|------------|------------|------------|
| H | -1.7850620 | 3.6826950  | -1.0736660 |
| H | -0.7291940 | 2.5061320  | -1.9009650 |
| H | -2.4016800 | 2.0354370  | -1.4277850 |
| H | -2.8516550 | 3.0461450  | 1.3689850  |
| H | -2.1104910 | 1.8194530  | 2.4419640  |
| H | -3.0336890 | 1.2947220  | 0.9880650  |
| H | 1.0381140  | -1.4920630 | 1.6355950  |
| H | 3.4427290  | -1.9832170 | 1.4062640  |
| H | 3.8874910  | 1.4160480  | -1.2054600 |
| H | 1.4953380  | 1.8907070  | -1.0166520 |

z\_pent\_ss\_oe\_2\_ts1.log

E = -1110.788299

H = -1110.463812

G = -1110.534080

NImag=1

|   |            |            |            |
|---|------------|------------|------------|
| C | -2.4475718 | -0.9822038 | -1.0498724 |
| C | -1.2295769 | -1.2681832 | -0.4228716 |
| C | -3.7884833 | -1.1332784 | -0.5564752 |
| O | -4.7739587 | -0.8748485 | -1.2736803 |
| C | -4.0477899 | -1.6016503 | 0.8663424  |
| C | -1.0223228 | -2.2444917 | 0.7116769  |
| C | -0.2865743 | 0.4258805  | 0.6009695  |
| S | -1.0355141 | 1.7755693  | -0.2502124 |
| C | 1.1191710  | 0.2228113  | 0.3546673  |
| C | -2.5675054 | 1.9685464  | 0.6747021  |
| C | -0.1713701 | 3.2712889  | 0.2963092  |
| C | 1.9176128  | -0.3901510 | 1.3532116  |
| C | 3.2462602  | -0.6968947 | 1.1286587  |
| C | 3.8371576  | -0.3968886 | -0.1122177 |
| C | 3.0681853  | 0.2074226  | -1.1189369 |
| C | 1.7355629  | 0.5059850  | -0.8901562 |
| H | -0.3857477 | -1.2417112 | -1.1134289 |
| C | 5.2146119  | -0.7044061 | -0.3464857 |
| N | 6.3322091  | -0.9544828 | -0.5358505 |
| H | -2.3965826 | -0.5468381 | -2.0466083 |
| H | -3.4987559 | -0.9945644 | 1.5945624  |
| H | -5.1179118 | -1.5256168 | 1.0686015  |
| H | -3.7341059 | -2.6417258 | 1.0005158  |
| H | 0.0394218  | -2.3060438 | 0.9637639  |
| H | -1.3495241 | -3.2441051 | 0.3996823  |
| H | -1.5702694 | -1.9806312 | 1.6166650  |
| H | -0.6067130 | 0.3979207  | 1.6423547  |
| H | -3.0655207 | 2.8626172  | 0.2962707  |
| H | -3.1837007 | 1.0909380  | 0.4878412  |
| H | -2.3305640 | 2.0701675  | 1.7357953  |
| H | -0.7018812 | 4.1322907  | -0.1171170 |
| H | 0.8426034  | 3.2339470  | -0.1057938 |
| H | -0.1558429 | 3.3022244  | 1.3871522  |
| H | 1.4715210  | -0.6163434 | 2.3178484  |
| H | 3.8395818  | -1.1617096 | 1.9100829  |
| H | 3.5204043  | 0.4369473  | -2.0789356 |
| H | 1.1636080  | 0.9638435  | -1.6939675 |

z\_pent\_ss\_oe\_3\_ts1.log

E = -1110.785720

H = -1110.460391

G = -1110.528312

NImag=1

|   |            |            |           |
|---|------------|------------|-----------|
| C | -1.1573116 | -1.7567446 | 0.5537667 |
|---|------------|------------|-----------|

|   |            |            |            |
|---|------------|------------|------------|
| C | -1.4597739 | -0.7036998 | 1.4349209  |
| C | -1.9711750 | -2.4412449 | -0.4076839 |
| O | -1.4871019 | -3.3236862 | -1.1479753 |
| C | -3.4687759 | -2.1830856 | -0.5254951 |
| C | -2.8531787 | -0.2264949 | 1.7787946  |
| C | -0.5583620 | 1.1362150  | 0.9025570  |
| S | -1.6023272 | 2.0566197  | -0.1653010 |
| C | 0.7926577  | 0.7722763  | 0.5228203  |
| C | -0.6217774 | 3.3377059  | -0.9936451 |
| C | -2.0348979 | 1.0001856  | -1.5787365 |
| C | 1.1647169  | 0.3736432  | -0.7791251 |
| C | 2.4426448  | -0.0951731 | -1.0490569 |
| C | 3.3849315  | -0.1962756 | -0.0172665 |
| C | 3.0332461  | 0.1782430  | 1.2909706  |
| C | 1.7603031  | 0.6547031  | 1.5479557  |
| H | -0.7835733 | -0.6504196 | 2.2875870  |
| C | 4.7036536  | -0.6834191 | -0.2952071 |
| N | 5.7716238  | -1.0772201 | -0.5188609 |
| H | -0.1318195 | -2.1235017 | 0.5797810  |
| H | -3.6861764 | -1.1767295 | -0.8972213 |
| H | -3.8833950 | -2.9084924 | -1.2282826 |
| H | -3.9716666 | -2.2912510 | 0.4395104  |
| H | -2.8042764 | 0.6438623  | 2.4386652  |
| H | -3.3937212 | -1.0196638 | 2.3091399  |
| H | -3.4479127 | 0.0400771  | 0.9014962  |
| H | -0.6490886 | 1.6004714  | 1.8833192  |
| H | -1.2805623 | 3.8356852  | -1.7093005 |
| H | -0.2968388 | 4.0413953  | -0.2258641 |
| H | 0.2337155  | 2.8897004  | -1.5009163 |
| H | -3.0965490 | 1.1433981  | -1.7827787 |
| H | -1.8301304 | -0.0338135 | -1.3003657 |
| H | -1.4393970 | 1.2876117  | -2.4466634 |
| H | 0.4572630  | 0.4258141  | -1.5993062 |
| H | 2.7120169  | -0.3918489 | -2.0579336 |
| H | 3.7626811  | 0.0987174  | 2.0910309  |
| H | 1.4942365  | 0.9481462  | 2.5598951  |

z\_pent\_ss\_oe\_4\_ts1.log

E = -1110.786007

H = -1110.460950

G = -1110.530420

NImag=1

|   |            |            |            |
|---|------------|------------|------------|
| C | -2.8521031 | -0.5640462 | -1.0105929 |
| C | -1.5282737 | -1.0030855 | -0.9161145 |
| C | -3.9848638 | -0.9155106 | -0.1998853 |
| O | -5.1132366 | -0.4378154 | -0.4236591 |
| C | -3.8341182 | -1.8719998 | 0.9710921  |
| C | -1.0698495 | -2.3434309 | -0.3886608 |
| C | -0.3878773 | 0.1736957  | 0.5355006  |
| S | -1.2141783 | 1.7169899  | 0.4600492  |
| C | 1.0377097  | 0.0432795  | 0.3432974  |
| C | -0.1955993 | 2.9410533  | 1.3185624  |
| C | -1.1282117 | 2.3760123  | -1.2316012 |
| C | 1.7819037  | 0.7714273  | -0.6165002 |
| C | 3.1331970  | 0.5359831  | -0.8124037 |
| C | 3.7944688  | -0.4479836 | -0.0623972 |
| C | 3.0772876  | -1.1925241 | 0.8915570  |
| C | 1.7322555  | -0.9452297 | 1.0879327  |
| H | -0.8900628 | -0.6433077 | -1.7241086 |
| C | 5.1894125  | -0.6917549 | -0.2670126 |
| N | 6.3209961  | -0.8900141 | -0.4327743 |



|   |            |            |            |
|---|------------|------------|------------|
| H | -3.0619786 | 0.2306781  | -1.7252926 |
| H | -3.0221967 | -1.5613415 | 1.6371759  |
| H | -4.7717905 | -1.8908830 | 1.5298168  |
| H | -3.6087177 | -2.8853120 | 0.6234527  |
| H | 0.0149213  | -2.4335885 | -0.4817023 |
| H | -1.5239293 | -3.1396633 | -0.9911996 |
| H | -1.3379270 | -2.5199294 | 0.6534389  |
| H | -0.7860340 | -0.3347306 | 1.4122044  |
| H | -0.6687293 | 3.9163179  | 1.1822038  |
| H | -0.1862280 | 2.6712884  | 2.3756913  |
| H | 0.8158987  | 2.9418694  | 0.9079761  |
| H | -2.0200458 | 2.9882061  | -1.3750898 |
| H | -1.1286203 | 1.5468953  | -1.9378279 |
| H | -0.2319684 | 2.9858050  | -1.3473954 |
| H | 1.3020882  | 1.5271001  | -1.2280953 |
| H | 3.6823709  | 1.1091881  | -1.5530930 |
| H | 3.5856206  | -1.9523776 | 1.4772020  |
| H | 1.1887265  | -1.5187590 | 1.8339921  |

z\_pent\_ss\_oe\_7\_ts1.log

E = -1110.786640

H = -1110.462316

G = -1110.531785

NImag=1

|   |            |            |            |
|---|------------|------------|------------|
| C | 2.4493108  | -1.1789337 | -0.8665472 |
| C | 1.4192595  | -0.5178228 | -1.5311087 |
| C | 2.2386031  | -2.1955308 | 0.1158105  |
| O | 3.1707878  | -2.6869792 | 0.7815255  |
| C | 0.8197886  | -2.6803177 | 0.3770402  |
| C | 1.7426301  | 0.2601366  | -2.7854574 |
| C | 0.5204309  | 1.1272910  | -0.4275011 |
| S | 1.4092819  | 1.7483440  | 0.9830062  |
| C | -0.8683490 | 0.7980186  | -0.1939240 |
| C | 2.1116067  | 0.3641180  | 1.9399112  |
| C | 2.9017507  | 2.3660318  | 0.1834784  |
| C | -1.4131787 | 0.4665035  | 1.0703296  |
| C | -2.7341977 | 0.0741122  | 1.2054587  |
| C | -3.5622425 | -0.0153060 | 0.0754419  |
| C | -3.0434008 | 0.3013638  | -1.1928274 |
| C | -1.7261970 | 0.6999046  | -1.3195828 |
| H | 0.4398968  | -0.9952187 | -1.5368602 |
| C | -4.9259591 | -0.4244020 | 0.2137112  |
| N | -6.0328444 | -0.7558160 | 0.3251958  |
| H | 3.4760608  | -0.8374269 | -0.9984815 |
| H | 0.1542714  | -1.8453598 | 0.6236230  |
| H | 0.4053498  | -3.1746152 | -0.5086552 |
| H | 0.8308860  | -3.3882419 | 1.2077571  |
| H | 0.8955693  | 0.8507320  | -3.1424828 |
| H | 2.0146745  | -0.4473214 | -3.5780539 |
| H | 2.5951662  | 0.9287118  | -2.6280000 |
| H | 0.6928810  | 1.8497400  | -1.2227690 |
| H | 2.4154826  | 0.8048760  | 2.8913658  |
| H | 1.3274894  | -0.3753343 | 2.1097958  |
| H | 2.9608239  | -0.0776490 | 1.4233380  |
| H | 3.5905642  | 2.6746985  | 0.9716487  |
| H | 2.6220983  | 3.2249647  | -0.4283266 |
| H | 3.3331551  | 1.5685012  | -0.4238968 |
| H | -0.8033379 | 0.5161765  | 1.9687798  |
| H | -3.1326915 | -0.1656609 | 2.1864845  |
| H | -3.6821965 | 0.2375529  | -2.0684161 |
| H | -1.3361903 | 0.9501668  | -2.3026902 |

z\_pent\_ss\_oe\_8\_fr\_ts1.log

E = -1110.795242

H = -1110.470413

G = -1110.537716

NImag=1

|   |            |            |            |
|---|------------|------------|------------|
| C | -0.2523780 | 2.4933497  | -0.5231505 |
| C | -1.2461488 | 1.8511157  | 0.2271492  |
| C | 1.1525594  | 2.6380787  | -0.2681201 |
| O | 1.8896765  | 3.2664627  | -1.0560693 |
| C | 1.7929346  | 2.0761492  | 0.9933109  |
| C | -1.1716226 | 1.5619186  | 1.7092582  |
| C | -1.4692914 | -0.1300757 | -0.5243117 |
| S | -2.7804191 | -0.9854735 | 0.2791182  |
| C | -0.1531094 | -0.7043646 | -0.3686364 |
| C | -4.1742950 | 0.1401379  | 0.0791361  |
| C | -3.2979104 | -2.3000226 | -0.8582793 |
| C | 0.2609371  | -1.4625108 | 0.7543482  |
| C | 1.5828607  | -1.8334351 | 0.9212393  |
| C | 2.5461164  | -1.4480363 | -0.0285779 |
| C | 2.1588517  | -0.7099341 | -1.1562973 |
| C | 0.8308029  | -0.3522579 | -1.3239369 |
| H | -2.2529728 | 2.0942633  | -0.1087439 |
| C | 3.9175825  | -1.8202482 | 0.1502306  |
| N | 5.0285841  | -2.1213007 | 0.2973022  |
| H | -0.5589108 | 2.9013124  | -1.4855966 |
| H | 1.4527649  | 2.6267701  | 1.8773300  |
| H | 1.5509507  | 1.0210312  | 1.1447599  |
| H | 2.8763135  | 2.1866212  | 0.9082208  |
| H | -2.1267944 | 1.1740926  | 2.0772149  |
| H | -0.9589416 | 2.4833319  | 2.2632172  |
| H | -0.3947255 | 0.8371141  | 1.9649795  |
| H | -1.7567489 | 0.1345367  | -1.5420646 |
| H | -5.0788569 | -0.4258502 | 0.3092856  |
| H | -4.0649703 | 0.9609257  | 0.7884584  |
| H | -4.1980587 | 0.5059103  | -0.9495127 |
| H | -4.1833694 | -2.7837404 | -0.4398145 |
| H | -2.4740800 | -3.0129443 | -0.9217582 |
| H | -3.5111747 | -1.8619114 | -1.8354930 |
| H | -0.4582282 | -1.7588789 | 1.5129652  |
| H | 1.8819020  | -2.4135773 | 1.7886623  |
| H | 2.9009505  | -0.4217685 | -1.8947236 |
| H | 0.5347366  | 0.2046034  | -2.2070829 |

z\_pent\_ss\_oz\_1\_ts1.log

E = -1110.787994

H = -1110.463052

G = -1110.534438

NImag=1

|   |            |            |            |
|---|------------|------------|------------|
| C | 2.8215228  | -0.6528717 | 0.9304239  |
| C | 1.4955376  | -1.0781916 | 0.8641717  |
| C | 3.8796048  | -1.0873227 | 0.0613401  |
| O | 3.7492377  | -1.8996281 | -0.8724475 |
| C | 5.2571606  | -0.4874233 | 0.2985752  |
| C | 1.0631475  | -2.3904268 | 0.2654021  |
| C | 0.3450581  | 0.1838177  | -0.5748445 |
| S | 1.1948503  | 1.7051249  | -0.4514047 |
| C | -1.0736277 | 0.0528368  | -0.3605129 |
| C | 0.1932013  | 2.9843579  | -1.2493413 |
| C | 1.1474330  | 2.3028992  | 1.2655863  |

|   |            |            |            |
|---|------------|------------|------------|
| C | -1.8066829 | 0.7798017  | 0.6100602  |
| C | -3.1555298 | 0.5457623  | 0.8211239  |
| C | -3.8283677 | -0.4343813 | 0.0758095  |
| C | -3.1230693 | -1.1776169 | -0.8882321 |
| C | -1.7799958 | -0.9331453 | -1.0992892 |
| H | 0.8507052  | -0.7315501 | 1.6724260  |
| C | -5.2212932 | -0.6748620 | 0.2947241  |
| N | -6.3517651 | -0.8705699 | 0.4717425  |
| H | 3.0683019  | 0.1405364  | 1.6317966  |
| H | 5.5124532  | 0.1583761  | -0.5493129 |
| H | 5.3160527  | 0.1009663  | 1.2170161  |
| H | 5.9997327  | -1.2902399 | 0.3336712  |
| H | -0.0256805 | -2.4807813 | 0.2662865  |
| H | 1.4667127  | -3.2034882 | 0.8831759  |
| H | 1.4509405  | -2.5265034 | -0.7435177 |
| H | 0.7418463  | -0.3209455 | -1.4528911 |
| H | 0.6861344  | 3.9439062  | -1.0766269 |
| H | 0.1716378  | 2.7587235  | -2.3165024 |
| H | -0.8153238 | 2.9876042  | -0.8318088 |
| H | 2.0589029  | 2.8821188  | 1.4219251  |
| H | 1.1289119  | 1.4484155  | 1.9407885  |
| H | 0.2720865  | 2.9352053  | 1.4154962  |
| H | -1.3193633 | 1.5329555  | 1.2188394  |
| H | -3.6948027 | 1.1181629  | 1.5697243  |
| H | -3.6394967 | -1.9346913 | -1.4704551 |
| H | -1.2466689 | -1.5049425 | -1.8539224 |

z\_pent\_ss\_oz\_2\_ts1.log

E = -1110.785855

H = -1110.461551

G = -1110.532473

NImag=1

|   |            |            |            |
|---|------------|------------|------------|
| C | 2.7804232  | -0.6683202 | 0.9151485  |
| C | 1.4260997  | -0.6693099 | 1.2378541  |
| C | 3.4135679  | -1.6030039 | 0.0270429  |
| O | 2.8261380  | -2.5271692 | -0.5640230 |
| C | 4.8996963  | -1.4134989 | -0.2321307 |
| C | 0.5568380  | -1.8973822 | 1.1901610  |
| C | 0.3400952  | 0.4341711  | -0.3842119 |
| S | 0.8466085  | 2.1264635  | -0.3987647 |
| C | -1.0851236 | 0.2360932  | -0.3264249 |
| C | 1.5641910  | 2.5827418  | 1.2053293  |
| C | 2.3414383  | 2.0675817  | -1.4050134 |
| C | -1.6697589 | -0.8768891 | -0.9850157 |
| C | -3.0193011 | -1.1510641 | -0.8795710 |
| C | -3.8504208 | -0.3143375 | -0.1107313 |
| C | -3.2973512 | 0.7959402  | 0.5480293  |
| C | -1.9423750 | 1.0586553  | 0.4473073  |
| H | 1.1175088  | 0.0615944  | 1.9839155  |
| C | -5.2484302 | -0.5922544 | -0.0002886 |
| N | -6.3839445 | -0.8178740 | 0.0889694  |
| H | 3.3970717  | 0.1555955  | 1.2632140  |
| H | 5.0354069  | -1.0439691 | -1.2553759 |
| H | 5.3662055  | -0.7065909 | 0.4578457  |
| H | 5.4076529  | -2.3798051 | -0.1627523 |
| H | -0.4594585 | -1.6707714 | 1.5202995  |
| H | 0.9775473  | -2.6488253 | 1.8705114  |
| H | 0.5315333  | -2.3455208 | 0.1964601  |
| H | 0.8858508  | -0.1225243 | -1.1416917 |
| H | 1.8378960  | 3.6369224  | 1.1212400  |
| H | 0.7861721  | 2.4662169  | 1.9616654  |

|   |            |            |            |
|---|------------|------------|------------|
| H | 2.4371857  | 1.9752206  | 1.4381421  |
| H | 2.8177002  | 3.0482100  | -1.3499769 |
| H | 2.0393858  | 1.8506459  | -2.4304162 |
| H | 2.9995059  | 1.2875451  | -1.0160554 |
| H | -1.0381282 | -1.5214120 | -1.5899794 |
| H | -3.4459269 | -2.0053977 | -1.3963670 |
| H | -3.9348986 | 1.4410572  | 1.1449682  |
| H | -1.5393026 | 1.9089962  | 0.9925022  |

z\_pent\_ss\_oz\_3\_ts1.log

E = -1110.793031  
H = -1110.468581  
G = -1110.539616

NImag=1

|   |            |            |            |
|---|------------|------------|------------|
| C | -1.8622635 | -1.5599724 | -0.3128028 |
| C | -1.1290244 | -1.2444655 | 0.8319793  |
| C | -3.2894888 | -1.5010620 | -0.4444001 |
| O | -4.0725153 | -1.1200319 | 0.4490049  |
| C | -3.8838636 | -1.9391569 | -1.7723083 |
| C | -1.7164621 | -1.1047725 | 2.2130922  |
| C | -0.2030955 | 0.8031366  | 0.7142271  |
| S | -1.1665176 | 1.5412759  | -0.5441105 |
| C | 1.1569239  | 0.4752522  | 0.3900060  |
| C | -2.7209139 | 1.8396273  | 0.3107864  |
| C | -0.5726754 | 3.2444976  | -0.7165888 |
| C | 2.0731651  | 0.2530484  | 1.4510489  |
| C | 3.3650830  | -0.1739773 | 1.2130257  |
| C | 3.8006294  | -0.3995725 | -0.1059528 |
| C | 2.9112258  | -0.1937023 | -1.1726696 |
| C | 1.6161822  | 0.2310197  | -0.9294708 |
| H | -0.1026036 | -1.6052663 | 0.8227919  |
| C | 5.1390256  | -0.8350386 | -0.3582251 |
| N | 6.2257122  | -1.1897100 | -0.5614254 |
| H | -1.3052900 | -1.8833562 | -1.1884499 |
| H | -4.3337767 | -1.0670513 | -2.2605286 |
| H | -3.1469992 | -2.3783578 | -2.4481341 |
| H | -4.6856290 | -2.6609042 | -1.5892881 |
| H | -0.9332370 | -0.8661200 | 2.9374359  |
| H | -2.1750210 | -2.0589798 | 2.5030601  |
| H | -2.5001987 | -0.3487565 | 2.2646248  |
| H | -0.3953772 | 1.2424143  | 1.6917292  |
| H | -3.3468612 | 2.4343240  | -0.3571917 |
| H | -3.1930737 | 0.8751419  | 0.5091732  |
| H | -2.5171853 | 2.3836514  | 1.2358197  |
| H | -1.2309302 | 3.7614486  | -1.4188818 |
| H | 0.4398718  | 3.1978478  | -1.1220812 |
| H | -0.5772587 | 3.7303931  | 0.2606726  |
| H | 1.7467597  | 0.4281884  | 2.4726369  |
| H | 4.0493269  | -0.3323229 | 2.0411018  |
| H | 3.2424247  | -0.3696737 | -2.1916221 |
| H | 0.9533996  | 0.3758296  | -1.7787747 |

z\_pent\_ss\_oz\_6\_ts1.log

E = -1110.795465  
H = -1110.470924  
G = -1110.539590

NImag=1

|   |            |            |            |
|---|------------|------------|------------|
| C | 0.1587420  | -2.4356926 | -0.5256883 |
| C | 1.2569959  | -1.9016147 | 0.1523988  |
| C | -1.1781554 | -2.5232889 | -0.0135048 |

|   |            |            |            |
|---|------------|------------|------------|
| O | -1.5225118 | -2.2703763 | 1.1574468  |
| C | -2.2536225 | -3.0172741 | -0.9729094 |
| C | 1.2662631  | -1.6714014 | 1.6412901  |
| C | 1.4730153  | 0.1408728  | -0.5517496 |
| S | 2.8012933  | 0.9407755  | 0.2722839  |
| C | 0.1633031  | 0.7080883  | -0.3572638 |
| C | 4.1865875  | -0.1656391 | -0.0512744 |
| C | 3.2851813  | 2.3394625  | -0.7771400 |
| C | -0.2299805 | 1.4431043  | 0.7889172  |
| C | -1.5428949 | 1.8332925  | 0.9746993  |
| C | -2.5201363 | 1.4941622  | 0.0204756  |
| C | -2.1544849 | 0.7770922  | -1.1281997 |
| C | -0.8358598 | 0.3943366  | -1.3120083 |
| H | 2.2271585  | -2.1325233 | -0.2844467 |
| C | -3.8799157 | 1.8989866  | 0.2122467  |
| N | -4.9820417 | 2.2277585  | 0.3683505  |
| H | 0.3022623  | -2.7263450 | -1.5634885 |
| H | -3.0989471 | -2.3218783 | -0.9456819 |
| H | -1.9013168 | -3.1151352 | -2.0027790 |
| H | -2.6224259 | -3.9910413 | -0.6314301 |
| H | 2.2321200  | -1.2839850 | 1.9816288  |
| H | 1.0798827  | -2.6165689 | 2.1638039  |
| H | 0.4697919  | -0.9872495 | 1.9433773  |
| H | 1.7461272  | -0.0993591 | -1.5792320 |
| H | 5.0988683  | 0.3775018  | 0.2019398  |
| H | 4.0903571  | -1.0418435 | 0.5902995  |
| H | 4.1838778  | -0.4462754 | -1.1066230 |
| H | 4.1845193  | 2.7916326  | -0.3529598 |
| H | 2.4602416  | 3.0538696  | -0.7576676 |
| H | 3.4639383  | 1.9793161  | -1.7922295 |
| H | 0.5003807  | 1.7082548  | 1.5485020  |
| H | -1.8251462 | 2.3971062  | 1.8584047  |
| H | -2.9058815 | 0.5284497  | -1.8717497 |
| H | -0.5551153 | -0.1387100 | -2.2148809 |

z\_pent\_ss\_oz\_9\_ts1.log

E = -1110.791776

H = -1110.466907

G = -1110.536726

NImag=1

|   |            |            |            |
|---|------------|------------|------------|
| C | -1.1697692 | -1.6914926 | 0.6791286  |
| C | -1.4306025 | -0.6384261 | 1.5573078  |
| C | -2.0906474 | -2.2760904 | -0.2501352 |
| O | -3.2714748 | -1.9085415 | -0.4175734 |
| C | -1.5785832 | -3.4269763 | -1.0998752 |
| C | -2.8090757 | -0.1592628 | 1.9383832  |
| C | -0.5338331 | 1.2579989  | 0.8624417  |
| S | -1.6190840 | 2.0767136  | -0.2303042 |
| C | 0.7930858  | 0.8302216  | 0.4908848  |
| C | -0.6621576 | 3.1694100  | -1.3172449 |
| C | -2.2791098 | 0.9280744  | -1.4657114 |
| C | 1.1303591  | 0.3046045  | -0.7768614 |
| C | 2.3943297  | -0.2066258 | -1.0325694 |
| C | 3.3618106  | -0.2284862 | -0.0192200 |
| C | 3.0452757  | 0.2685546  | 1.2579696  |
| C | 1.7870089  | 0.7868219  | 1.5002349  |
| H | -0.6977414 | -0.5262568 | 2.3549216  |
| C | 4.6653643  | -0.7594003 | -0.2824937 |
| N | 5.7219792  | -1.1893862 | -0.4949430 |
| H | -0.1675659 | -2.1115387 | 0.6934653  |
| H | -1.4907142 | -3.0819794 | -2.1369604 |

|   |            |            |            |
|---|------------|------------|------------|
| H | -0.6054285 | -3.8004069 | -0.7736169 |
| H | -2.3071774 | -4.2428880 | -1.0865896 |
| H | -2.7470104 | 0.7241110  | 2.5794392  |
| H | -3.3120347 | -0.9547216 | 2.5037106  |
| H | -3.4437210 | 0.0553858  | 1.0784703  |
| H | -0.6140367 | 1.7677709  | 1.8199547  |
| H | -1.3663305 | 3.6342365  | -2.0108973 |
| H | -0.1996070 | 3.9283675  | -0.6848688 |
| H | 0.0944238  | 2.6020693  | -1.8605984 |
| H | -3.0163039 | 1.5038727  | -2.0303887 |
| H | -2.7700232 | 0.1027713  | -0.9472007 |
| H | -1.5018822 | 0.5638000  | -2.1372826 |
| H | 0.4025520  | 0.2856882  | -1.5791915 |
| H | 2.6331071  | -0.6002585 | -2.0157951 |
| H | 3.7922869  | 0.2492809  | 2.0456209  |
| H | 1.5509162  | 1.1747353  | 2.4875577  |

z\_pentenone\_1.log

E = -270.444870  
H = -270.318028  
G = -270.357441

NImag=0

|   |            |           |            |
|---|------------|-----------|------------|
| C | -0.9665714 | 2.1951186 | -0.3124226 |
| C | -1.4700192 | 1.8548770 | 0.8862951  |
| C | 0.4407546  | 2.4584489 | -0.7037180 |
| O | 0.6940137  | 2.6256513 | -1.8908361 |
| H | -1.6581461 | 2.3059247 | -1.1452241 |
| H | -2.5531989 | 1.7404753 | 0.9180238  |
| C | 1.5378763  | 2.5444180 | 0.3258116  |
| H | 2.4241246  | 2.9805068 | -0.1378490 |
| H | 1.2319874  | 3.1424884 | 1.1878754  |
| H | 1.7851182  | 1.5394526 | 0.6846742  |
| C | -0.7798172 | 1.6078209 | 2.1949098  |
| H | -0.6493985 | 2.5512738 | 2.7397037  |
| H | -1.3993832 | 0.9594790 | 2.8186540  |
| H | 0.2017447  | 1.1463136 | 2.0854122  |

z\_pentenone\_2.log

E = -270.446077  
H = -270.319551  
G = -270.359906

NImag=0

|   |            |            |            |
|---|------------|------------|------------|
| C | 0.2035076  | -0.8864519 | 0.0909151  |
| C | 0.8367243  | -1.5404241 | -0.8972380 |
| C | -0.9676227 | 0.0089218  | -0.0823360 |
| O | -1.2981795 | 0.4666039  | -1.1682053 |
| H | 0.5375335  | -1.0334077 | 1.1156421  |
| H | 1.6796361  | -2.1652954 | -0.6029121 |
| C | -1.7290807 | 0.3368543  | 1.1766645  |
| H | -2.5826791 | 0.9768225  | 0.9505163  |
| H | -2.0686419 | -0.5863543 | 1.6584035  |
| H | -1.0630928 | 0.8426636  | 1.8845959  |
| C | 0.5225575  | -1.5265525 | -2.3599534 |
| H | 1.1186074  | -0.7527803 | -2.8606287 |
| H | 0.7947506  | -2.4847340 | -2.8101870 |
| H | -0.5267716 | -1.3053222 | -2.5565521 |

## References

---

- (S1) G. R. Fulmer, A. J. M. Miller, N. H. Sherden, H. E. Gottlieb, A. Nudelman, B. M. Stoltz, J. E. Bercaw and K. I. Goldberg, *Organometallics*, 2010, **29**, 2176-2179.
- (S2) B. Schmidt, F. Wolf and C. Ehlert, *J. Org. Chem.*, 2016, **81**, 11235-11249.
- (S3) Y. Tamura, Y. Sumida, S.-I. Haruki and M. Ikeda, *J. Chem. Soc., Perkin Trans. 1*, 1975, 575-579.
- (S4) D. S. Allgäuer, H. Jangra, H. Asahara, Z. Li, Q. Chen, H. Zipse, A. R. Ofial and H. Mayr, *J. Am. Chem. Soc.*, 2017, **139**, 13318-13329.
- (S5) (a) T. Zincke and H. Rollhäuser, *Chem. Ber.*, 1912, **45**, 1495-1511. (b) F. von Nussbaum, V. M.-J. Li, S. Allerheiligen, S. Anlauf, L. Bärfacker, M. Bechem, M. Delbeck, M. F. Fitzgerald, M. Gerisch, H. Gielen-Haertwig, H. Haning, D. Karthaus, D. Lang, K. Lustig, D. Meibom, J. Mittendorf, U. Rosentreter, M. Schäfer, S. Schäfer, J. Schamberger, L. A. Telan and A. Tersteegen, *ChemMedChem*, 2015, **10**, 1163-1173.
- (S6) (a) For the chemoassay setup: A. Böhme, D. Thaens, A. Paschke and G. Schüürmann, *Chem. Res. Toxicol.*, 2009, **22**, 742-750. (b) For the evaluation of  $k_{\text{GSH}}$ : K. Umezawa, M. Yoshida, M. Kamiya, T. Yamasoba, Y. Urano, *Nat. Chem.* 2017, **9**, 279-286. (c) H. Esterbauer, H. Zollner and N. Scholz, *Z. Naturforsch. C*, 1975, **30**, 466-473.
- (S7) Bruker: SAINT. Bruker AXS Inc., Madison, Wisconsin, USA, 2012.
- (S8) G. M. Sheldrick, SADABS (1996), University of Göttingen, Germany.
- (S9) G. M. Sheldrick, *Acta Cryst.*, 2015, **A71**, 3-8.
- (S10) E. Harder, W. Damm, J. Maple, C. Wu, M. Reboul, J. Y. Xiang, L. Wang, D. Lupyan, M. K. Dahlgren, J. L. Knight, J. W. Kaus, D. S. Cerutti, G. Krilov, W. L. Jorgensen, R. Abel and R. A. Friesner, *J. Chem. Theory Comput.*, 2016, **12**, 281-296.
- (S11) Schrödinger Release 2019-4: MacroModel, Schrödinger, LLC, New York, NY, 2019.
- (S12) Gaussian 16, Revision A.03, M. J. Frisch, G. W. Trucks, H. B. Schlegel, G. E. Scuseria, M. A. Robb, J. R. Cheeseman, G. Scalmani, V. Barone, G. A. Petersson, H. Nakatsuji, X. Li, M. Caricato, A. V. Marenich, J. Bloino, B. G. Janesko, R. Gomperts, B. Mennucci, H. P. Hratchian, J. V. Ortiz, A. F. Izmaylov, J. L. Sonnenberg, D. Williams-Young, F. Ding, F. Lipparini, F. Egidi, J. Goings, B. Peng, A. Petrone, T. Henderson, D. Ranasinghe, V. G. Zakrzewski, J. Gao, N. Rega, G. Zheng, W. Liang, M. Hada, M. Ehara, K. Toyota, R. Fukuda, J. Hasegawa, M. Ishida, T. Nakajima, Y. Honda, O. Kitao, H. Nakai, T. Vreven, K. Throssell, J. A. Montgomery, Jr., J. E. Peralta, F. Ogliaro, M. J. Bearpark, J. J. Heyd, E. N. Brothers, K. N. Kudin, V. N. Staroverov, T. A. Keith, R. Kobayashi, J. Normand, K. Raghavachari, A. P. Rendell, J. C. Burant, S. S. Iyengar, J. Tomasi, M. Cossi, J. M. Millam, M. Klene, C. Adamo, R. Cammi, J. W. Ochterski, R. L. Martin, K. Morokuma, O. Farkas, J. B. Foresman and D. J. Fox, Gaussian Inc., Wallingford CT, 2016.
- (S13) Y. Zhao and D. G. Truhlar, *Theor. Chem. Acc.*, 2008, **120**, 215-241.
- (S14) A. V. Marenich, C. J. Cramer and D. G. Truhlar, *J. Phys. Chem. B*, 2009, **113**, 6378-6396.
- (S15) D. Svatunek and K. N. Houk, *J. Comput. Chem.*, 2019, **40**, 2509-2515.
- (S16) P. Vermeeren, S. C. C. van der Lubbe, C. F. Guerra, F. M. Bickelhaupt and T. A. Hamlin, *Nat. Protocols*, 2020, **15**, 649-667.
- (S17) a) B. Jeziorski, R. Moszynski and K. Szalewicz, *Chem. Rev.*, 1994, **94**, 1887-1930; b) T. M. Parker, L. A. Burns, R. M. Parrish, A. G. Ryno and C. D. Sherrill, *J. Chem. Phys.*, 2014, **140**, 094106
- (S18) R. M. Parrish, L. A. Burns, D. G. A. Smith, A. C. Simmonett, A. E. DePrince III, E. G. Hohenstein, U. Bozkaya, A. Yu. Sokolov, R. Di Remigio, R. M. Richard, J. F. Gonthier, A. M. James, H. R.

---

McAlexander, A. Kumar, M. Saitow, X. Wang, B. P. Pritchard, P. Verma, H. F. Schaefer III, K. Patkowski, R. A. King, E. F. Valeev, F. A. Evangelista, J. M. Turney, T. D. Crawford and C. D. Sherrill, *J. Chem. Theory Comput.*, 2017, **13**, 3185–3197.
